# Supplementary material for: Photocatalyst-free, visible-light-induced regio- and stereoselective synthesis of phosphorylated enamines from N -allenamides via [1,3]-sulfonyl shift at room temperature
Source: Royal Society of Chemistry journal article supplement (doi:10.1039/d4sc05190d), 2024-01-01
Supplement: d4sc05190d1.pdf [file d4sc05190d1.pdf]

## Supporting Information

### **Photocatalyst-free, visible-light-induced regio- and stereoselective synthesis of phosphorylated enamines from *N*-allenamides via [1,3]-sulfonyl shift at room temperature**

Jia-Dong Guo,<sup>a</sup> Feven-Alemu Korsaye,<sup>b</sup> Dorian Schutz,<sup>a</sup> Ilaria Ciofini<sup>b\*</sup> and Laurence Miesch<sup>a\*</sup>

a. Equipe Synthèse Organique et Phytochimie, Institut de Chimie, CNRS-UdS, UMR 7177, 4 rue Blaise Pascal, CS 90032, 67081, Strasbourg.

b. Chimie ParisTech, PSL University, CNRS, Institute of Chemistry for Life and Health Sciences, Chemical Theory and Modelling Group, F-75005 Paris.

Corresponding authors: [lmiesch@unistra.fr](mailto:lmiesch@unistra.fr)

[ilaria.ciofini@chimieparistech.psl.eu](mailto:ilaria.ciofini@chimieparistech.psl.eu)

## Table of Contents

|                                                                                                         |      |
|---------------------------------------------------------------------------------------------------------|------|
| 1. General information.....                                                                             | S3   |
| 2. Substrates preparation .....                                                                         | S4   |
| 2.1 Synthesis of compounds <b>1a–1o</b> , <b>1q</b> and <b>1s–1y</b> .....                              | S4   |
| 2.2 Synthesis of compound <b>1r</b> .....                                                               | S4   |
| 2.3 Synthesis of compounds <b>3b–3g</b> .....                                                           | S5   |
| 2.4 Synthesis of compounds <b>7a–7q</b> .....                                                           | S5   |
| 2.5 Synthesis of compounds <b>7t</b> .....                                                              | S6   |
| 2.6 Synthesis of compounds <b>7u</b> .....                                                              | S6   |
| 3. Reaction optimization.....                                                                           | S8   |
| 4. General experimental procedure.....                                                                  | S9   |
| 5. Optical spectroscopic data .....                                                                     | S9   |
| 5.1 UV-vis absorption spectra .....                                                                     | S9   |
| 5.2 Fluorescence spectra.....                                                                           | S10  |
| 5.3 Phosphorescence spectra.....                                                                        | S10  |
| 6. Initial results.....                                                                                 | S11  |
| 6.1 Synthesis of compound <b>2</b> .....                                                                | S11  |
| 6.2 Sequential synthesis of compound <b>4a</b> .....                                                    | S11  |
| 7. Scale-up experiment .....                                                                            | S12  |
| 8. Photoreaction with using <b>1s</b> as substrate .....                                                | S12  |
| 9. Sunlight reaction .....                                                                              | S12  |
| 10. Diverse transformations .....                                                                       | S13  |
| 10.1 Synthesis of compound <b>5</b> .....                                                               | S13  |
| 10.2 Synthesis of compound <b>6</b> .....                                                               | S13  |
| 11. Experiments relevant to the mechanism: terminal <i>N</i> -sulfonyl allenamide.....                  | S14  |
| 12. Limitations of the method: terminal <i>N</i> -sulfonyl allenamide .....                             | S15  |
| 13. Light on/off experiment.....                                                                        | S16  |
| 14. Characterization data for compounds.....                                                            | S17  |
| 15. Copies of <sup>1</sup> H NMR, <sup>13</sup> C NMR, <sup>19</sup> F NMR and <sup>31</sup> P NMR..... | S43  |
| 16. X-ray crystallography data.....                                                                     | S192 |
| 16.1 Crystallography data of <b>4I</b> (CCDC 2281377) .....                                             | S193 |
| 16.2 Crystallography data of <b>5</b> (CCDC 2281378) .....                                              | S206 |
| 16.3 Crystallography data of <b>8a</b> (CCDC 2310786) .....                                             | S217 |
| 17. Computational details.....                                                                          | S230 |
| 18. References.....                                                                                     | S275 |

## 1. General information

All required reagents were purchased from commercial suppliers (TCI, Alfa Aesar, Acros and Aladdin) and were used directly without purification. NMR Spectra ( $^1\text{H}$ ,  $^{13}\text{C}$ ,  $^{19}\text{F}$ ,  $^{31}\text{P}$ ) were performed at 298 K.  $^1\text{H}$  (500 MHz, 400 MHz or 300 MHz) and  $^{13}\text{C}$  (126 MHz) NMR chemical shifts are reported relative to residual solvent. DEPT (Distortionless Enhancement by Polarization Transfer) shows positive peaks for primary carbons ( $\text{CH}_3$ ) and tertiary carbons ( $\text{CH}$ ), and negative peaks for secondary carbons ( $\text{CH}_2$ ). However, quaternary carbons ( $\text{C}$ ) do not generate a peak.  $^{19}\text{F}$  (282 MHz or 471 MHz) and  $^{31}\text{P}$  (121 MHz, 162 MHz or 202 MHz) NMR chemical shifts are reported without any calibration. Data are presented as follows: chemical shift (ppm), multiplicity (s = singlet, d = doublet, t = triplet, q = quartet, m = multiplet), coupling constant  $J$  (Hz) and integration. HRMS data were recorded on a microTOF spectrometer equipped with an orthogonal electrospray (ESI) interface. Thin layer chromatography was performed using Merck TLC silica gel 60 F254 aluminum sheets using petroleum ether/ethyl acetate as eluant and visualized using permanganate stain, ninhydrin stain, vanillin stain and/or UV light. Merck Geduran<sup>®</sup> 40–63  $\mu\text{m}$  silica gel was used for column chromatography. Biotage<sup>®</sup> Isolera<sup>™</sup> One system was used for flash chromatography. The wavelength of the UV-detector was calibrated at 254 and 365 nm. Infrared spectra were reported in frequency of absorption using Alpha Bruker Optics spectrometer. Melting points were recorded with a SMP3 Stuart Scientific microscope in open capillary tubes and are uncorrected. UV-vis-NIR absorption spectra were recorded with a Cary 5000 UV-vis-NIR spectrophotometer. Photoluminescence spectra (PL) were obtained using a fluorescence spectrophotometer at 298 K or a phosphorescence spectrophotometer at 77 K (Edinburgh Instrument FLS-920). A four-channel LEDs were employed as the irradiation apparatus (4x4 array, for each channel electrical input 3.2 V x 600 mA x 4 blue LEDs,  $420 \pm 10$  nm, light intensity 200–600 mW/cm<sup>2</sup>), and Pyrex tubes were used as the reaction vessel. The distance from the LEDs to Pyrex tubes was less than 5 mm. No filter was used during irradiation.

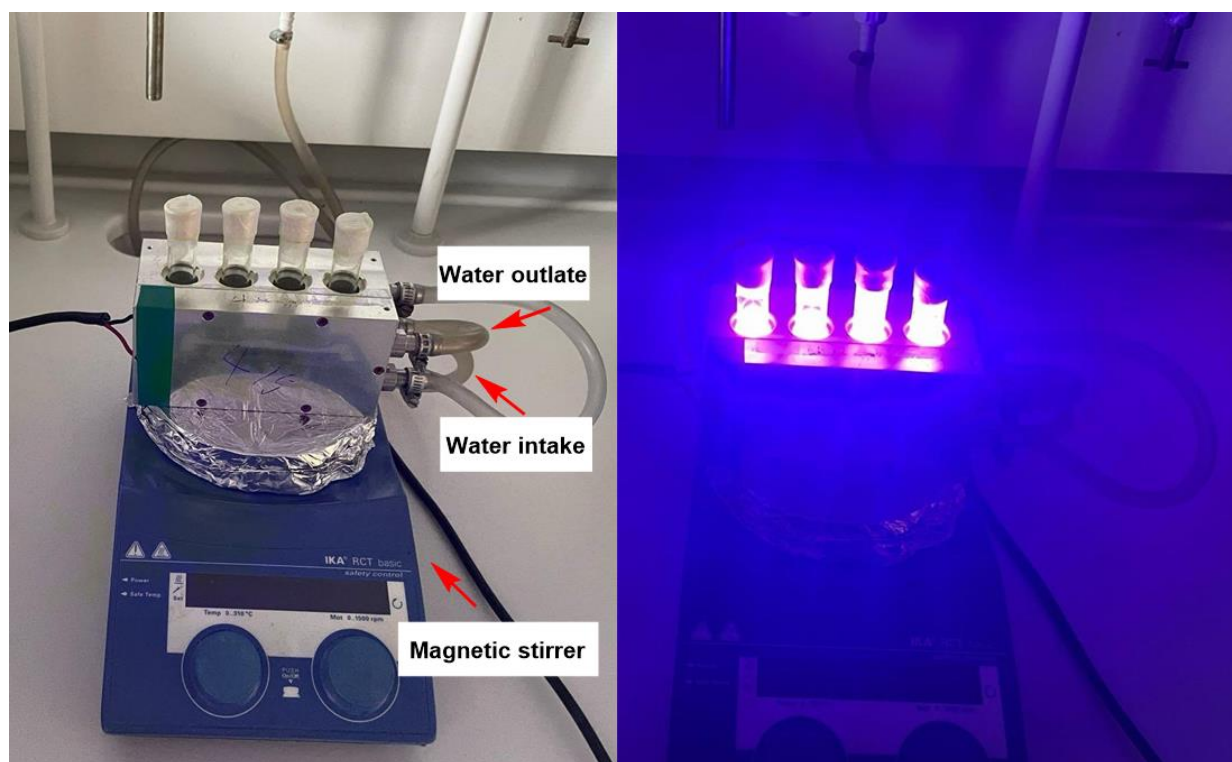

## 2. Substrates preparation

### 2.1 Synthesis of compounds 1a–1o, 1q and 1s–1y

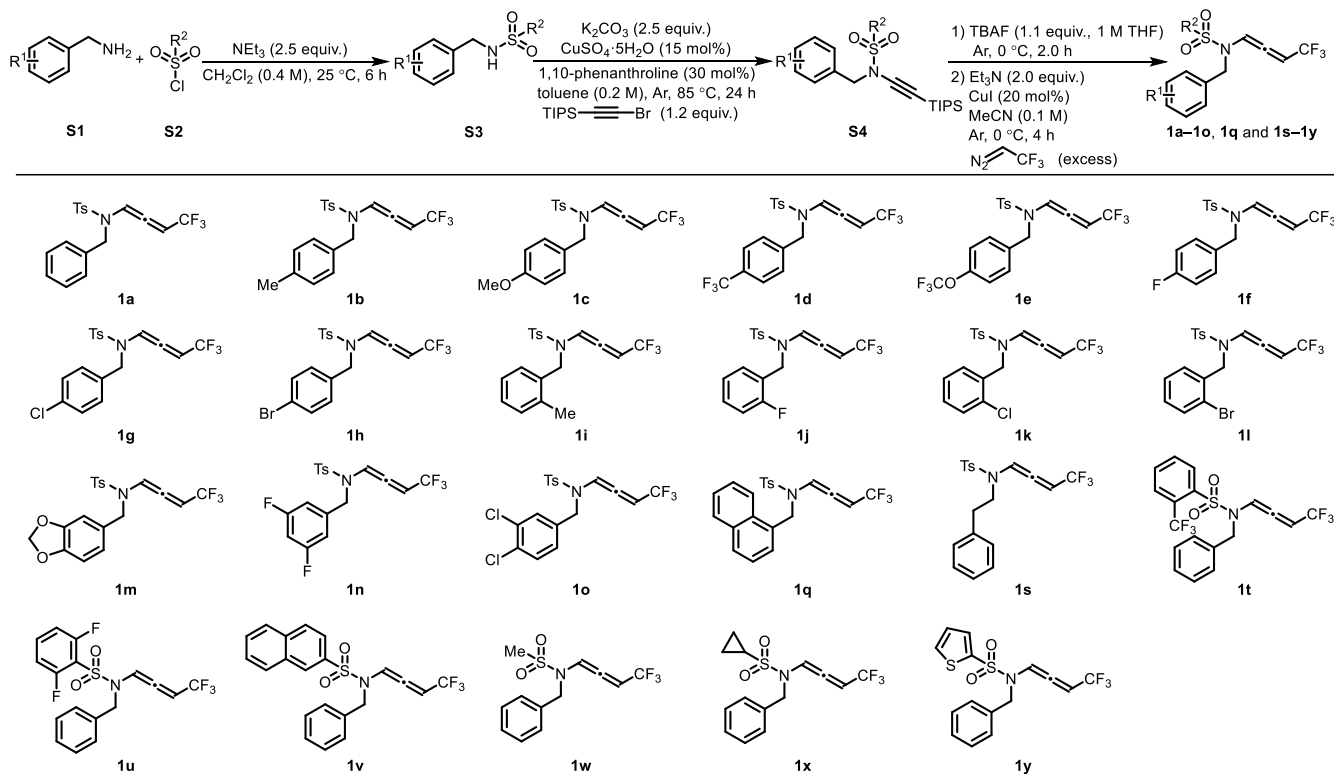

To a solution of amine **S1** (1.0 equiv.) and sulfonyl chloride **S2** (1.2 equiv.) in  $\text{CH}_2\text{Cl}_2$  ( $c = 0.4$  M) was added dropwise  $\text{Et}_3\text{N}$  (2.5 equiv.). The mixture was stirred at 25 °C during 6 h and then hydrolyzed with an aqueous solution of HCl (1.0 N). The aqueous layer was extracted with  $\text{CH}_2\text{Cl}_2$  ( $3 \times 30$  mL). The organic layers were washed with a saturated solution of NaCl, dried with anhydrous  $\text{Na}_2\text{SO}_4$ , filtered and concentrated under vacuum. The crude sulfonamide **S3** was used without further purification.

In a Schlenk tube was introduced  $\text{CuSO}_4 \cdot 5\text{H}_2\text{O}$  (15 mol%), 1,10-phenanthroline (30 mol%),  $\text{K}_2\text{CO}_3$  (2.5 equiv.), sulfonamide (1.0 equiv.), anhydrous toluene ( $c = 0.2$  M) and the bromoacetylenic derivative (1.2 equiv.), and bubbled with a stream of argon for 0.5 h. The reaction mixture was heated to 85 °C for 24 h and then cooled down to room temperature, filtered through a pad of Celite® and washed with ethyl acetate. The filtrate was then concentrated under vacuum. The crude material was purified by column chromatography to afford TIPS protected ynamide **S4**.<sup>1</sup>

TIPS protected ynamide (1.0 equiv.) was dissolved in anhydrous THF ( $c = 0.1$  M), and bubbled with a stream of argon for 0.5 h, and cooled to 0 °C. A solution of TBAF (1.1 equiv., 1 M in THF) was added dropwise. The mixture was stirred at 0 °C during 2 h, and then hydrolyzed with water. The aqueous layer was extracted with  $\text{Et}_2\text{O}$  ( $3 \times 30$  mL). The organic layers were washed with a saturated solution of NaCl, dried with anhydrous  $\text{Na}_2\text{SO}_4$ , filtered and concentrated under vacuum. The crude ynamide was used without further purification.<sup>2</sup> Ynamide (1.0 equiv.) was dissolved in MeCN ( $c = 0.1$  M) in the presence of CuI (20 mol%), and  $\text{Et}_3\text{N}$  (2.0 equiv.), and bubbled with a stream of argon for 0.5 h. 2-diazo-1,1,1-trifluoroethane<sup>3</sup> was added dropwise (in excess) and the reaction was stirred for 4 h at 0 °C. The mixture was concentrated under vacuum and the crude material was purified by flash chromatography treated with  $\text{Et}_3\text{N}$  using a step gradient of ethyl acetate in petroleum ether (ethyl acetate/petroleum ether 0–20%) to afford compounds **1a–1o, 1q** and **1s–1y**.<sup>4</sup>

### 2.2 Synthesis of compound 1r

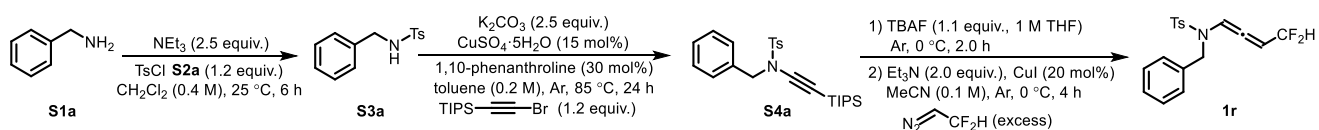

To a solution of phenylmethanamine **S1a** (1.0 equiv.) and 4-methylbenzenesulfonyl chloride **S2a** (1.2 equiv.) in  $\text{CH}_2\text{Cl}_2$  ( $c = 0.4$  M) was added dropwise  $\text{Et}_3\text{N}$  (2.5 equiv.). The mixture was stirred at 25 °C during 6 h and then hydrolyzed with an aqueous solution of HCl (1.0 N). The aqueous layer was extracted with  $\text{CH}_2\text{Cl}_2$  ( $3 \times 30$  mL). The organic layers were washed with a saturated solution of

NaCl, dried with anhydrous Na<sub>2</sub>SO<sub>4</sub>, filtered and concentrated under vacuum. The crude *N*-benzyl-4-methylbenzenesulfonamide **S3a** was used without further purification.

In a Schlenk tube was introduced CuSO<sub>4</sub>·5H<sub>2</sub>O (15 mol%), 1,10-phenanthroline (30 mol%), K<sub>2</sub>CO<sub>3</sub> (2.5 equiv.), *N*-benzyl-4-methylbenzenesulfonamide (1.0 equiv.), anhydrous toluene (c = 0.2 M) and the bromoacetylenic derivative (1.2 equiv.), and bubbled with a stream of argon for 0.5 h. The reaction mixture was heated to 85 °C for 24 h and then cooled down to room temperature, filtered through a pad of Celite® and washed with ethyl acetate. The filtrate was then concentrated under vacuum. The crude material was purified by column chromatography to afford compound **S4a**.<sup>1</sup>

**S4a** (1.0 equiv.) was dissolved in anhydrous THF (c = 0.1 M), and bubbled with a stream of argon for 0.5 h, and cooled to 0 °C. A solution of TBAF (1.1 equiv., 1 M in THF) was added dropwise. The mixture was stirred at 0°C during 2 h, and then hydrolyzed with water. The aqueous layer was extracted with Et<sub>2</sub>O (3 × 30 mL). The organic layers were washed with a saturated solution of NaCl, dried with anhydrous Na<sub>2</sub>SO<sub>4</sub>, filtered and concentrated under vacuum. The crude ynamide was used without further purification.<sup>2</sup> Ynamide (1.0 equiv.) was dissolved in MeCN (c = 0.1 M) in the presence of CuI (20 mol%), and Et<sub>3</sub>N (2.0 equiv.), and bubbled with a stream of argon for 0.5 h. 2-diazo-1,1-difluoroethane<sup>3</sup> was added dropwise (in excess) and the reaction was stirred for 4 h at 0 °C. The mixture was concentrated under vacuum and the crude material was purified by flash chromatography treated with Et<sub>3</sub>N using a step gradient of ethyl acetate in petroleum ether (ethyl acetate/petroleum ether 0–20%) to afford compound **1r**.<sup>4</sup>

### 2.3 Synthesis of compounds 3b–3g

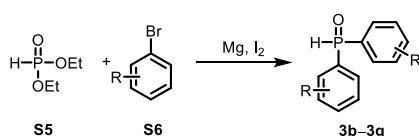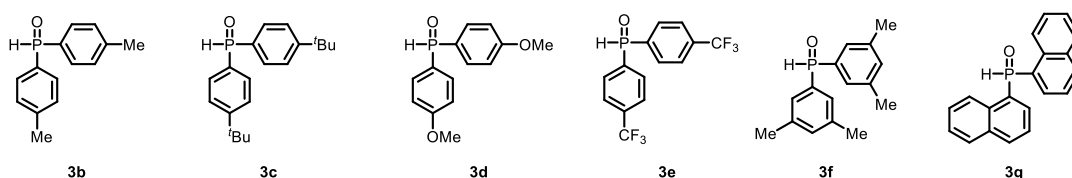

Magnesium chips (30 mmol, 3.0 equiv.), catalytic amount of iodine (10 mol%) and 100 mL anhydrous THF solution were added into a 250 mL dry two-necked flask under argon atmosphere. Afterwards, aryl bromide compound **S6** (5 mmol, 0.5 equiv.) was added dropwise. After the initiation, aryl bromide compound **S6** (25 mmol, 2.5 equiv.) was further added dropwise. The reaction mixture was refluxed for 30 minutes before cooled to 0 °C. The solution of diethyl phosphite **S5** (10 mmol, 1.0 equiv.) in 20 mL THF was added dropwise to the reaction system at 0 °C, and the reaction mixture was kept stirring overnight. The reaction was then quenched with saturated NH<sub>4</sub>Cl, after which the resulting solution was filtered through Celite, washed with diethyl ether (3 × 10 mL). The filtrate was extracted with diethyl ether (3 × 30 mL), and the organic phase was collected, dried with anhydrous Na<sub>2</sub>SO<sub>4</sub>, recrystallized with CH<sub>2</sub>Cl<sub>2</sub> and petroleum ether to obtain the target pure product **3b–3g**.<sup>5</sup>

### 2.4 Synthesis of compounds 7a–7q

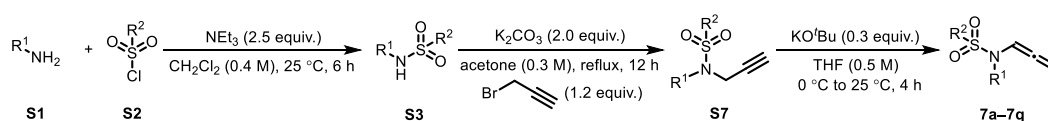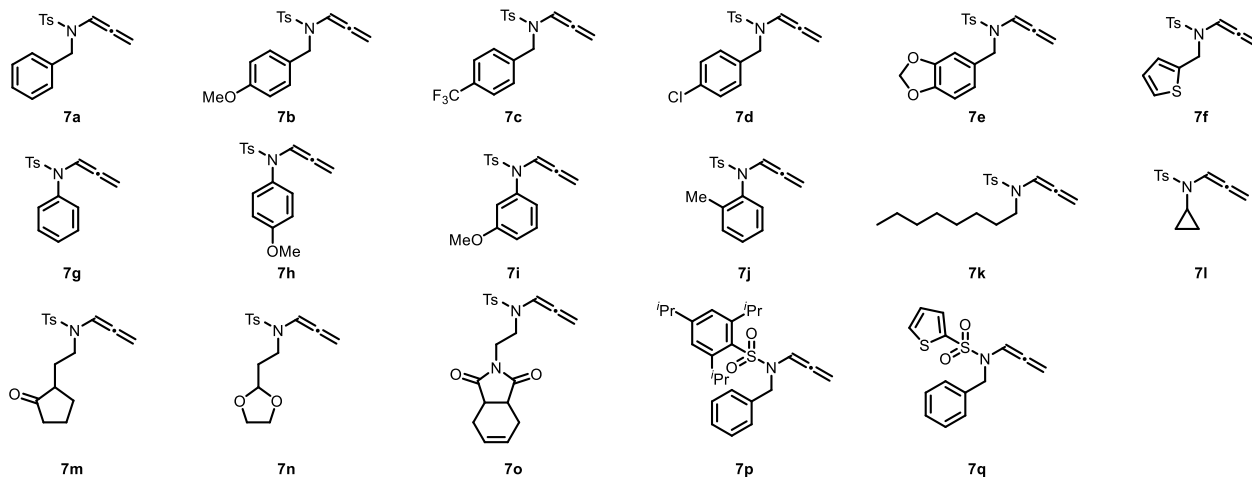

To a solution of amine **S1** (1.0 equiv.) and sulfonyl chloride **S2** (1.2 equiv.) in  $\text{CH}_2\text{Cl}_2$  ( $c = 0.4 \text{ M}$ ) was added dropwise  $\text{Et}_3\text{N}$  (2.5 equiv.). The mixture was stirred at  $25^\circ\text{C}$  during 6 h and then hydrolyzed with an aqueous solution of  $\text{HCl}$  (1.0 N). The aqueous layer was extracted with  $\text{CH}_2\text{Cl}_2$  ( $3 \times 30 \text{ mL}$ ). The organic layers were washed with a saturated solution of  $\text{NaCl}$ , dried with anhydrous  $\text{Na}_2\text{SO}_4$ , filtered and concentrated under vacuum. The crude sulfonamide **S3** was used without further purification.

A flame-dried two-neck 100 mL round-bottomed flask equipped with a magnetic stir bar was charged with sulfonamide **S3** (1.0 equiv.),  $\text{K}_2\text{CO}_3$  (2.0 equiv.) and acetone ( $c = 0.3 \text{ M}$ ), capped with a rubber septum and flushed with argon followed by dropwise addition of 3-bromopropyne (1.2 equiv.). The reaction mixture was refluxed with stirring for 12 h. Then the resulting mixture was quenched by addition of water and extracted with ethyl acetate ( $3 \times 50 \text{ mL}$ ). The combined organic fractions were washed with brine (50 mL), dried over  $\text{Na}_2\text{SO}_4$  and filtrated. After the solvent was removed under reduced pressure, the residue was purified by silica gel column chromatography to afford the pure alkynes **S7**.

A flame-dried 100 mL round-bottomed flask equipped with a magnetic stir bar was charged with alkyne (1.0 equiv.), capped with a rubber septum and flushed with argon, was added anhydrous THF ( $c = 0.5 \text{ M}$ ) and cooled to  $0^\circ\text{C}$ . A solution of  $\text{KO}^t\text{Bu}$  (0.3 equiv.) in anhydrous THF was added dropwise. The reaction mixture was warmed to room temperature and stirred for 4 h. The resulting mixture was quenched by addition of water and extracted with ethyl acetate ( $3 \times 50 \text{ mL}$ ). The combined organic fractions were washed with brine (50 mL), dried over  $\text{Na}_2\text{SO}_4$  and filtrated. After the solvent was removed under reduced pressure, the residue was purified by silica gel column chromatography to afford the allenes **7a–7q**.

## 2.5 Synthesis of compounds 7t

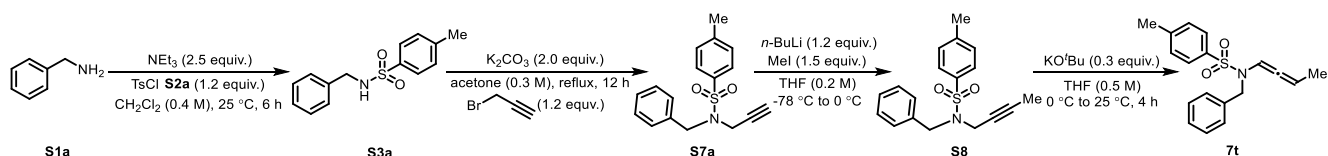

To a solution of phenylmethanamine **S1a** (1.0 equiv.) and 4-methylbenzenesulfonyl chloride **S2a** (1.2 equiv.) in  $\text{CH}_2\text{Cl}_2$  ( $c = 0.4 \text{ M}$ ) was added dropwise  $\text{Et}_3\text{N}$  (2.5 equiv.). The mixture was stirred at  $25^\circ\text{C}$  during 6 h and then hydrolyzed with an aqueous solution of  $\text{HCl}$  (1.0 N). The aqueous layer was extracted with  $\text{CH}_2\text{Cl}_2$  ( $3 \times 30 \text{ mL}$ ). The organic layers were washed with a saturated solution of  $\text{NaCl}$ , dried with anhydrous  $\text{Na}_2\text{SO}_4$ , filtered and concentrated under vacuum. The crude *N*-benzyl-4-methylbenzenesulfonamide **S3a** was used without further purification.

A flame-dried two-neck 100 mL round-bottomed flask equipped with a magnetic stir bar was charged with sulfonamide **S3a** (1.0 equiv.),  $\text{K}_2\text{CO}_3$  (2.0 equiv.) and acetone ( $c = 0.3 \text{ M}$ ), capped with a rubber septum and flushed with argon followed by dropwise addition of 3-bromopropyne (1.2 equiv.). The reaction mixture was refluxed with stirring for 12 h. Then the resulting mixture was quenched by addition of water and extracted with ethyl acetate ( $3 \times 50 \text{ mL}$ ). The combined organic fractions were washed with brine (50 mL), dried over  $\text{Na}_2\text{SO}_4$  and filtrated. After the solvent was removed under reduced pressure, the residue was purified by silica gel column chromatography to afford the pure alkynes **S7a**.

Under an argon atmosphere, the alkynes **S7a** (1.0 equiv.) was solubilized in THF ( $c = 0.2 \text{ M}$ ) and subsequently added dropwise to a solution of *n*-BuLi (1.2 equiv.) at  $-78^\circ\text{C}$ . Subsequently, the mixture was subjected to stirring for 30 minutes at this cryogenic temperature. Then, MeI (1.5 equiv.) was added dropwise to the reaction system, and the reaction mixture was warmed to  $0^\circ\text{C}$ , and stirred for an additional 12 h. The reaction was quenched with water at  $0^\circ\text{C}$ . The organic phase was extracted with ethyl acetate ( $3 \times 30 \text{ mL}$ ), and the combined organic extracts were dried over  $\text{Na}_2\text{SO}_4$ , filtered, and concentrated under reduced pressure to afford a crude residue. The crude product was purified by silica gel column chromatography to afford the **S8**.

A flame-dried 100 mL round-bottomed flask equipped with a magnetic stir bar was charged with the compound **S8** (1.0 equiv.), capped with a rubber septum and flushed with argon, was added anhydrous THF ( $c = 0.5 \text{ M}$ ) and cooled to  $0^\circ\text{C}$ . A solution of  $\text{KO}^t\text{Bu}$  (0.3 equiv.) in anhydrous THF was added dropwise. The reaction mixture was warmed to room temperature and stirred for 4 h. The resulting mixture was quenched by addition of water and extracted with ethyl acetate ( $3 \times 50 \text{ mL}$ ). The combined organic fractions were washed with brine (50 mL), dried over  $\text{Na}_2\text{SO}_4$  and filtrated. After the solvent was removed under reduced pressure, the residue was purified by silica gel column chromatography to afford compound **7t**.

## 2.6 Synthesis of compounds 7u

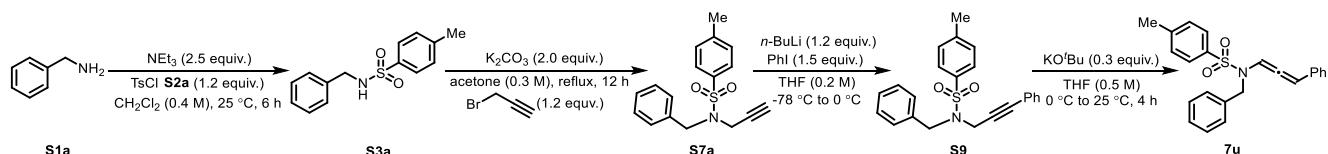

To a solution of phenylmethanamine **S1a** (1.0 equiv.) and 4-methylbenzenesulfonyl chloride **S2a** (1.2 equiv.) in  $\text{CH}_2\text{Cl}_2$  ( $c = 0.4 \text{ M}$ ) was added dropwise  $\text{Et}_3\text{N}$  (2.5 equiv.). The mixture was stirred at  $25^\circ\text{C}$  during 6 h and then hydrolyzed with an aqueous solution of  $\text{HCl}$  (1.0 N). The aqueous layer was extracted with  $\text{CH}_2\text{Cl}_2$  ( $3 \times 30 \text{ mL}$ ). The organic layers were washed with a saturated solution of  $\text{NaCl}$ , dried with anhydrous  $\text{Na}_2\text{SO}_4$ , filtered and concentrated under vacuum. The crude *N*-benzyl-4-methylbenzenesulfonamide **S3a** was used without further purification.

A flame-dried two-neck 100 mL round-bottomed flask equipped with a magnetic stir bar was charged with sulfonamide **S3a** (1.0 equiv.),  $K_2CO_3$  (2.0 equiv.) and acetone (c = 0.3 M), capped with a rubber septum and flushed with argon followed by dropwise addition of 3-bromopropyne (1.2 equiv.). The reaction mixture was refluxed with stirring for 12 h. Then the resulting mixture was quenched by addition of water and extracted with ethyl acetate (3 x 50 mL). The combined organic fractions were washed with brine (50 mL), dried over  $Na_2SO_4$  and filtrated. After the solvent was removed under reduced pressure, the residue was purified by silica gel column chromatography to afford the pure alkynes **S7a**.

Under an argon atmosphere, the alkynes **S7a** (1.0 equiv.) was solubilized in THF (c = 0.2 M) and subsequently added dropwise to a solution of *n*-BuLi (1.2 equiv.) at  $-78^\circ C$ . Subsequently, the mixture was subjected to stirring for 30 minutes at this cryogenic temperature. Then, PhI (1.5 equiv.) was added dropwise to the reaction system, and the reaction mixture was warmed to  $0^\circ C$ , and stirred for an additional 12 h. The reaction was quenched with water at  $0^\circ C$ . The organic phase was extracted with ethyl acetate (3 x 30 mL), and the combined organic extracts were dried over  $Na_2SO_4$ , filtered, and concentrated under reduced pressure to afford a crude residue. The crude product was purified by silica gel column chromatography to afford the **S9**.

A flame-dried 100 mL round-bottomed flask equipped with a magnetic stir bar was charged with the compound **S9** (1.0 equiv.), capped with a rubber septum and flushed with argon, was added anhydrous THF (c = 0.5 M) and cooled to  $0^\circ C$ . A solution of KO<sup>t</sup>Bu (0.3 equiv.) in anhydrous THF was added dropwise. The reaction mixture was warmed to room temperature and stirred for 4 h. The resulting mixture was quenched by addition of water and extracted with ethyl acetate (3 x 50 mL). The combined organic fractions were washed with brine (50 mL), dried over  $Na_2SO_4$  and filtrated. After the solvent was removed under reduced pressure, the residue was purified by silica gel column chromatography to afford compound **7u**.

### 3. Reaction optimization

**Table S1.** Variation from standard conditions<sup>a</sup>

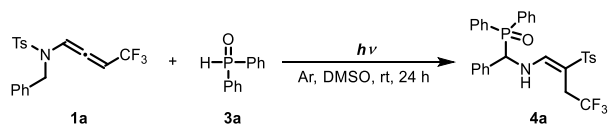

| entry | variation from "standard conditions"               | yield <sup>b</sup> (%) |
|-------|----------------------------------------------------|------------------------|
| 1     | none                                               | 86                     |
| 2     | MeCN                                               | 53                     |
| 3     | THF                                                | 36                     |
| 4     | ethyl acetate                                      | 30                     |
| 5     | CH <sub>2</sub> Cl <sub>2</sub>                    | 32                     |
| 6     | toluene                                            | 60                     |
| 7     | acetone                                            | 14                     |
| 8     | in the dark                                        | n.r.                   |
| 9     | in open air                                        | n.r.                   |
| 10    | <b>3a</b> (0.2 mmol)                               | 91                     |
| 11    | <b>3a</b> (0.3 mmol)                               | 90                     |
| 12    | UV ( $\lambda = 360$ nm)                           | 73                     |
| 13    | 12 h                                               | 58                     |
| 14    | DMSO (8 mL)                                        | 86                     |
| 15    | <i>fac</i> -Ir(ppy) <sub>3</sub> as photocatalyst  | n.d. <sup>c</sup>      |
| 16    | dimethyl(phenyl)silane instead of <b>3a</b>        | n.d. <sup>d</sup>      |
| 17    | 1,3-diphenylpropane-1,3-dione instead of <b>3a</b> | n.d. <sup>d</sup>      |
| 18    | dibenzyl phosphonate instead of <b>3a</b>          | n.d. <sup>e</sup>      |

<sup>a</sup>Standard conditions: **1a** (0.2 mmol), **3a** (0.2 mmol, 1.0 equiv.) in DMSO (2 mL) was irradiated for 24 h with blue LEDs ( $\lambda = 420$  nm) under argon atmosphere at room temperature. <sup>b</sup>Isolated yields, n.r. = no reaction, n.d.=not detected. <sup>c</sup>Decomposition of starting material. <sup>d</sup>No corresponding product was detected, and only compound **2** was formed after the reaction. <sup>e</sup>No corresponding product was detected, and only compound **6** was formed after the reaction.



## 4. General experimental procedure

A 10 mL Pyrex tube equipped with a magnetic stirrer was charged with substrate **1** (0.2 mmol, 1.0 equiv.) and H-phosphine oxide **3** (0.2 mmol, 1.0 equiv.) in DMSO (2 mL). The mixture was bubbled with a stream of argon for 0.5 h. The sample was then irradiated by LEDs ( $\lambda = 420 \pm 10$  nm) for 24 h. After reaction, the solution was extracted with  $\text{CH}_2\text{Cl}_2$  and washed with brine and dried with anhydrous  $\text{Na}_2\text{SO}_4$ . Upon removal of solvent under vacuum, the residue was purified by column chromatography on silica gel using a mixture petroleum ether/ethyl acetate as eluent or just by washing with diethyl ether and then recrystallization using  $\text{CH}_2\text{Cl}_2$  and hexane afford the corresponding products **4**.

A 10 mL Pyrex tube equipped with a magnetic stirrer was charged with substrate **7** (0.2 mmol, 1.0 equiv.) and H-phosphine oxide **3** (0.6 mmol, 3.0 equiv.) in DMSO (2 mL). The mixture was bubbled with a stream of argon for 0.5 h. The sample was then irradiated by LEDs ( $\lambda = 420 \pm 10$  nm) for 48 h. After reaction, the solution was extracted with  $\text{CH}_2\text{Cl}_2$  and washed with brine and dried with anhydrous  $\text{Na}_2\text{SO}_4$ . Upon removal of solvent under vacuum, the residue was purified by column chromatography on silica gel using a mixture petroleum ether/ethyl acetate as eluent afford the corresponding products **8**.

The identity and purity of the product was confirmed by  $^1\text{H}$  NMR,  $^{13}\text{C}$  NMR,  $^{19}\text{F}$  NMR and  $^{31}\text{P}$  NMR spectroscopic analysis.

## 5. Optical spectroscopic data

### 5.1 UV-vis absorption spectra

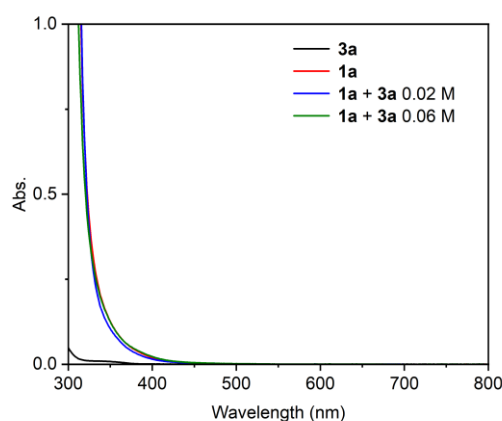

**Figure S1.** UV-vis absorption spectra of **3a** ( $2.0 \times 10^{-2}$  M) in DMSO (black); **1a** ( $2.0 \times 10^{-2}$  M) in DMSO (red); **1a** ( $2.0 \times 10^{-2}$  M) and **3a** ( $2.0 \times 10^{-2}$  M) in DMSO under argon atmosphere (blue); **1a** ( $2.0 \times 10^{-2}$  M) and **3a** ( $6.0 \times 10^{-2}$  M) in DMSO under argon atmosphere (green).

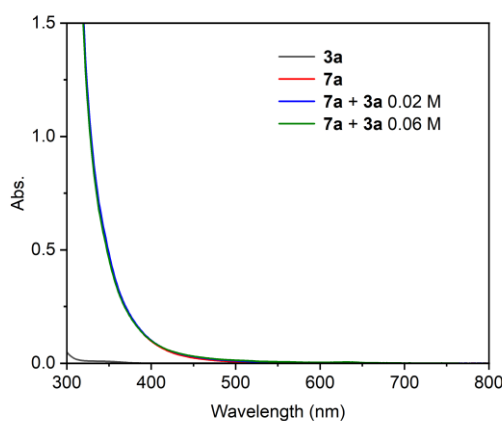

**Figure S2.** UV-vis absorption spectra of **3a** ( $2.0 \times 10^{-2}$  M) in DMSO (black); **7a** ( $2.0 \times 10^{-2}$  M) in DMSO (red); **7a** ( $2.0 \times 10^{-2}$  M) and **3a** ( $2.0 \times 10^{-2}$  M) in DMSO under argon atmosphere (blue); **7a** ( $2.0 \times 10^{-2}$  M) and **3a** ( $6.0 \times 10^{-2}$  M) in DMSO under argon atmosphere (green).

## 5.2 Fluorescence spectra

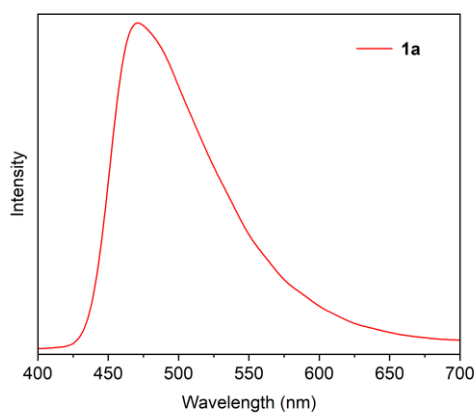

**Figure S3.** Fluorescence spectra of **1a** ( $2.0 \times 10^{-2}$  M) in MeCN under argon atmosphere at 298 K.

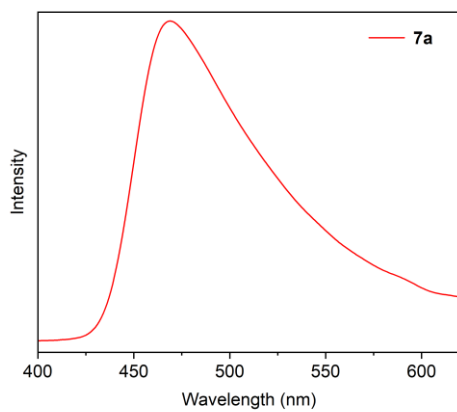

**Figure S4.** Fluorescence spectra of **7a** ( $2.0 \times 10^{-2}$  M) in MeCN under argon atmosphere at 298 K.

## 5.3 Phosphorescence spectra

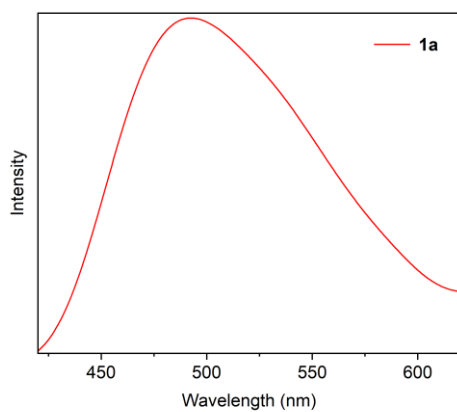

**Figure S5.** Phosphorescence spectra of **1a** ( $2.0 \times 10^{-2}$  M) in 2-methyltetrahydrofuran under argon atmosphere at 77 K with flash delay 1.0 ms.

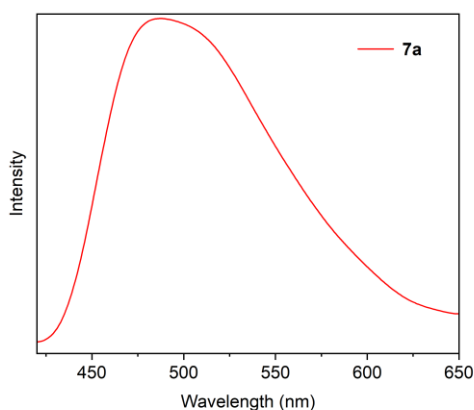

**Figure S6.** Phosphorescence spectra of **7a** ( $2.0 \times 10^{-2}$  M) in 2-methyltetrahydrofuran under argon atmosphere at 77 K with flash delay 1.0 ms.

## 6. Initial results

### 6.1 Synthesis of compound 2

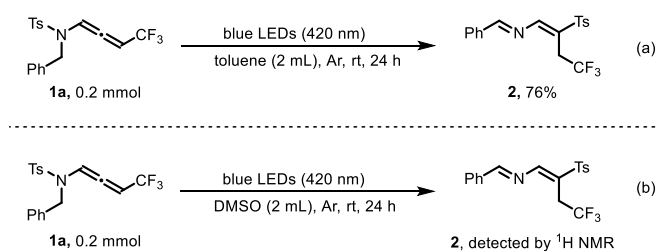

**Scheme S1.** Synthesis of (*E*)-1-phenyl-*N*-((*E*)-4,4,4-trifluoro-2-tosylbut-1-en-1-yl)methanimine (**2**)

**Scheme S1a:** A 10 mL Pyrex tube equipped with a magnetic stirrer was charged with substrate **1a** (0.2 mmol, 1.0 equiv.) in toluene (2 mL). The sample was bubbled with a stream of argon for 0.5 h, and then irradiated by LEDs ( $\lambda = 420 \pm 10$  nm) for 24 h. Upon completion of the reaction, the solvent was then removed under vacuum. The residue was purified by flash chromatography afford the corresponding product **2**.  $^1\text{H NMR}$  yield with hydroquinone as internal standard. White solid; **Melting point:** 98–100 °C; **R<sub>f</sub>** = 0.26 (petroleum ether : ethyl acetate = 5:1);  **$^1\text{H NMR}$  (500 MHz, DMSO)**  $\delta$  8.88 (s, 1H), 8.28 (s, 1H), 7.94 (dd,  $J = 8.5$  Hz,  $J = 1.5$  Hz, 2H), 7.82 (dt,  $J = 8.5$  Hz,  $J = 2.0$  Hz, 2H), 7.64–7.60 (m, 1H), 7.56–7.53 (m, 2H), 7.46–7.45 (m, 2H), 3.62 (q,  $J = 11.0$  Hz, 2H), 2.40 (s, 3H);  **$^{13}\text{C NMR}$  (126 MHz, DMSO)**  $\delta$  172.2, 154.6, 144.6, 136.9, 135.0, 133.6, 130.1, 129.9, 129.2, 128.8 (q,  $J_{\text{C-F}} = 2.6$  Hz), 127.8, 125.1 (q,  $J_{\text{C-F}} = 279.3$  Hz), 30.4 (q,  $J_{\text{C-F}} = 31.8$  Hz), 21.1;  **$^{19}\text{F NMR}$  (282 MHz, DMSO)**  $\delta$  -61.60 (s, 3F); **ESI-HRMS (ESI-TOF):**  $m/z$  calcd for  $\text{C}_{18}\text{H}_{16}\text{F}_3\text{NNaO}_2\text{S}^+ [\text{M}+\text{Na}]^+$ : 390.0747, found 390.0738.

**Scheme S1b:** A 10 mL Pyrex tube equipped with a magnetic stirrer was charged with substrate **1a** (0.2 mmol, 1.0 equiv.) in DMSO (2 mL). The sample was bubbled with a stream of argon for 0.5 h, and then irradiated by LEDs ( $\lambda = 420 \pm 10$  nm) for 24 h. After reaction, the solution was extracted with  $\text{CH}_2\text{Cl}_2$  and washed with brine and dried with anhydrous  $\text{Na}_2\text{SO}_4$ , the solvent was then removed under vacuum. The product **2** was detected by  $^1\text{H NMR}$ .

### 6.2 Sequential synthesis of compound 4a

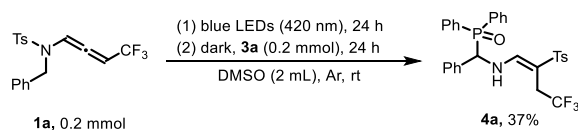

**Scheme S2.** Sequential synthesis of (*E*)-diphenyl(phenyl((4,4,4-trifluoro-2-tosylbut-1-en-1-yl)amino)methyl)phosphine oxide (**4a**)

A 10 mL Pyrex tube equipped with a magnetic stirrer was charged with substrate **1a** (0.2 mmol, 1.0 equiv.) in DMSO (2 mL). The sample was bubbled with a stream of argon for 0.5 h, and then irradiated by LEDs ( $\lambda = 420 \pm 10$  nm) for 24 h. Upon completion of the reaction, compound **3a** (0.2 mmol, 1.0 equiv.) were added. The mixture was then stirred for 24 h in the dark. After reaction, the solution was extracted with  $\text{CH}_2\text{Cl}_2$  and washed with brine and dried with anhydrous  $\text{Na}_2\text{SO}_4$ . Upon removal of solvent under vacuum, the

residue was purified just by washing with diethyl ether and then recrystallization using  $\text{CH}_2\text{Cl}_2$  and hexane afford the corresponding product **4a** (42.2 mg, 37% yield).

## 7. Scale-up experiment

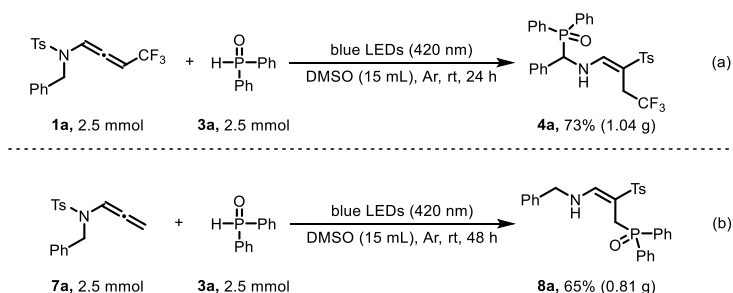

**Scheme S3a:** A 25 mL eggplant-type flask equipped with a magnetic stirrer was charged with substrate **1a** (2.5 mmol, 1.0 equiv.) and **3a** (2.5 mmol, 1.0 equiv.) in DMSO (15 mL). The mixture was bubbled with a stream of argon for 0.5 h. The sample was then irradiated by blue LEDs ( $\lambda = 420$  nm) 24 h. After reaction, the solution was extracted with  $\text{CH}_2\text{Cl}_2$  and washed with brine and dried with anhydrous  $\text{Na}_2\text{SO}_4$ . Upon removal of solvent under vacuum, the residue was purified just by washing with diethyl ether and then recrystallization using  $\text{CH}_2\text{Cl}_2$  and hexane afford the corresponding product **4a** (73%, 1.04 g).

**Scheme S3b:** A 25 mL eggplant-type flask equipped with a magnetic stirrer was charged with substrate **7a** (2.5 mmol, 1.0 equiv.) and **3a** (2.5 mmol, 1.0 equiv.) in DMSO (15 mL). The mixture was bubbled with a stream of argon for 0.5 h. The sample was then irradiated by blue LEDs ( $\lambda = 420$  nm) 48 h. After reaction, the solution was extracted with  $\text{CH}_2\text{Cl}_2$  and washed with brine and dried with anhydrous  $\text{Na}_2\text{SO}_4$ . Upon removal of solvent under vacuum, the residue was purified by column chromatography on silica gel using a mixture petroleum ether/ethyl acetate as eluent afford the corresponding products **8a** (65%, 0.81 g).

## 8. Photoreaction with using **1s** as substrate

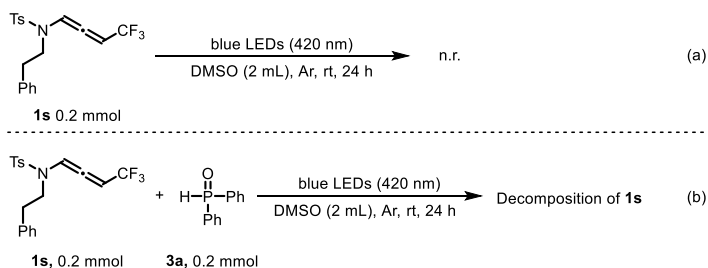

**Scheme S4a:** A 10 mL Pyrex tube equipped with a magnetic stirrer was charged with substrate **1s** (0.2 mmol, 1.0 equiv.) in DMSO (2 mL). The sample was bubbled with a stream of argon for 0.5 h, and then irradiated by LEDs ( $\lambda = 420 \pm 10$  nm) for 24 h. After reaction, the solution was extracted with  $\text{CH}_2\text{Cl}_2$  and washed with brine and dried with anhydrous  $\text{Na}_2\text{SO}_4$ . The residue was purified with chromatography column on silica gel using mixtures of ethyl acetate and petroleum to give the starting material **1s**.

**Scheme S4b:** A 10 mL Pyrex tube equipped with a magnetic stirrer was charged with substrate **1s** (0.2 mmol, 1.0 equiv.) and H-phosphine oxide **3a** (0.2 mmol, 1.0 equiv.) in DMSO (2 mL). The mixture was bubbled with a stream of argon for 0.5 h. The sample was then irradiated by LEDs ( $\lambda = 420 \pm 10$  nm) for 24 h. After reaction, the solution was extracted with  $\text{CH}_2\text{Cl}_2$  and washed with brine and dried with anhydrous  $\text{Na}_2\text{SO}_4$ . The starting material **1s** decomposition detected by TLC, and no obvious products that can be separated.

## 9. Sunlight reaction

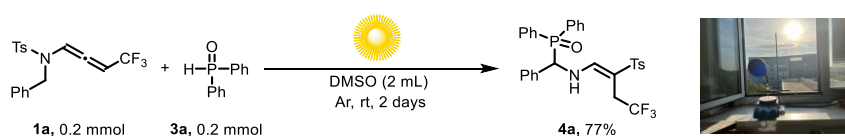

### Scheme S5. Sunlight reaction.

A 10 mL Pyrex tube equipped with a magnetic stirrer was charged with substrate **1a** (0.2 mmol, 1.0 equiv.) and **3a** (0.2 mmol, 1.0 equiv.) in DMSO (2 mL). The mixture was bubbled with a stream of argon for 0.5 h. The sample was then irradiated by sunlight for 2 days. After reaction, the solution was extracted with CH<sub>2</sub>Cl<sub>2</sub> and washed with brine and dried with anhydrous Na<sub>2</sub>SO<sub>4</sub>. Upon removal of solvent under vacuum, the residue was purified just by washing with diethyl ether and then recrystallization using CH<sub>2</sub>Cl<sub>2</sub> and hexane afford the corresponding product **4a** (87.7 mg, 77% yield). The irradiation was maintained on July 8 and 9, 2023, from 5:00 a.m. till 9:00 p.m. (Longitude: 7.766209, Latitude: 48.580251).

## 10. Diverse transformations

### 10.1 Synthesis of compound 5

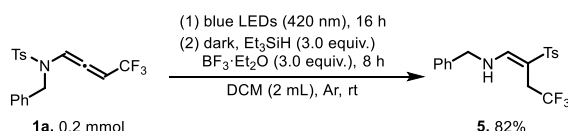

Scheme S6. Synthesis of (*E*)-*N*-benzyl-4,4,4-trifluoro-2-tosylbut-1-en-1-amine (**5**)

A 10 mL Pyrex tube equipped with a magnetic stirrer was charged with substrate **1a** (0.2 mmol, 1.0 equiv.) in CH<sub>2</sub>Cl<sub>2</sub> (2 mL). The sample was bubbled with a stream of argon for 0.5 h, and then irradiated by LEDs ( $\lambda = 420 \pm 10$  nm) for 16 h. Upon completion of the reaction, compound Et<sub>3</sub>SiH (3.0 equiv.) and BF<sub>3</sub>·Et<sub>2</sub>O (3.0 equiv.) were added by syringe under argon. The mixture was then stirred for 8 h in the dark. Upon completion of the reaction, the solvent was then removed under vacuum. The residue was purified with chromatography column on silica gel using mixtures of ethyl acetate and petroleum to give the corresponding products **5** (60.6 mg, 82% yield). White solid; **Melting point**: 88–90°C; **<sup>1</sup>H NMR (500 MHz, C<sub>6</sub>D<sub>6</sub>)**  $\delta$  7.81 (dt,  $J = 8.5$  Hz,  $J = 2.0$  Hz, 2H), 7.72 (d,  $J = 14.5$  Hz, 1H), 7.08–7.02 (m, 3H), 6.87 (d,  $J = 7.0$  Hz, 2H), 6.81 (d,  $J = 8.5$  Hz, 2H), 4.53–4.47 (m, 1H), 3.62 (d,  $J = 5.5$  Hz, 2H), 2.91 (q,  $J = 11.0$  Hz, 2H), 1.88 (s, 3H); **<sup>13</sup>C NMR (126 MHz, C<sub>6</sub>D<sub>6</sub>)**  $\delta$  149.9, 142.4, 141.3, 138.4, 129.6, 129.0, 127.6, 127.5, 127.2, 126.8 (q,  $J_{C-F} = 279.8$  Hz), 97.1 (q,  $J_{C-F} = 2.8$  Hz), 52.2, 30.3 (q,  $J_{C-F} = 31.8$  Hz), 21.1; **<sup>19</sup>F NMR (282 MHz, C<sub>6</sub>D<sub>6</sub>)**  $\delta$  -63.27 (s, 3F); **ESI-HRMS (ESI-TOF)**:  $m/z$  calcd for C<sub>18</sub>H<sub>18</sub>F<sub>3</sub>NNaO<sub>2</sub>S<sup>+</sup> [M+Na]<sup>+</sup>: 392.0903, found 392.0897.

### 10.2 Synthesis of compound 6

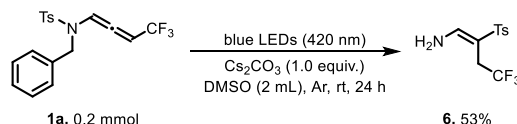

Scheme S7. (*E*)-4,4,4-trifluoro-2-tosylbut-1-en-1-amine (**6**)

A 10 mL Pyrex tube equipped with a magnetic stirrer was charged with substrate **1a** (0.2 mmol, 1.0 equiv.) and Cs<sub>2</sub>CO<sub>3</sub> (0.2 mmol, 1.0 equiv.) in DMSO (2 mL). The mixture was bubbled with a stream of argon for 0.5 h. The sample was then irradiated by LEDs ( $\lambda = 420 \pm 10$  nm) for 24 h. After reaction, the solution was extracted with CH<sub>2</sub>Cl<sub>2</sub> and washed with brine and dried with anhydrous Na<sub>2</sub>SO<sub>4</sub>. Upon removal of solvent under vacuum, the residue was purified with chromatography column on silica gel using mixtures of ethyl acetate and petroleum to give the corresponding products **6** (29.6 mg, 53% yield). Yellow solid; **Melting point**: 92–94°C; **<sup>1</sup>H NMR (500 MHz, DMSO)**  $\delta$  7.61 (dt,  $J = 9.0$  Hz,  $J = 2.5$  Hz, 2H), 7.53 (t,  $J = 12.0$  Hz, 1H), 7.31 (d,  $J = 8.5$  Hz, 2H), 6.94 (s, 2H), 3.15 (q,  $J = 11.0$  Hz, 2H), 2.34 (s, 3H); **<sup>13</sup>C NMR (126 MHz, DMSO)**  $\delta$  149.4, 142.0, 141.2, 129.4, 126.4 (q,  $J_{C-F} = 280.0$  Hz), 126.3, 93.7 (q,  $J_{C-F} = 2.6$  Hz), 28.6 (q,  $J_{C-F} = 31.0$  Hz), 20.9; **<sup>19</sup>F NMR (471 MHz, DMSO)**  $\delta$  -63.09 (s, 3F); **IR (neat)**:  $\nu = 3503, 3392, 1645, 1270, 1127, 681, 581$  cm<sup>-1</sup>; **ESI-HRMS (ESI-TOF)**:  $m/z$  calcd for C<sub>11</sub>H<sub>12</sub>F<sub>3</sub>KNO<sub>2</sub>S<sup>+</sup> [M+K]<sup>+</sup>: 318.0172, found 318.0160.

## 11. Experiments relevant to the mechanism: terminal *N*-sulfonyl allenamide

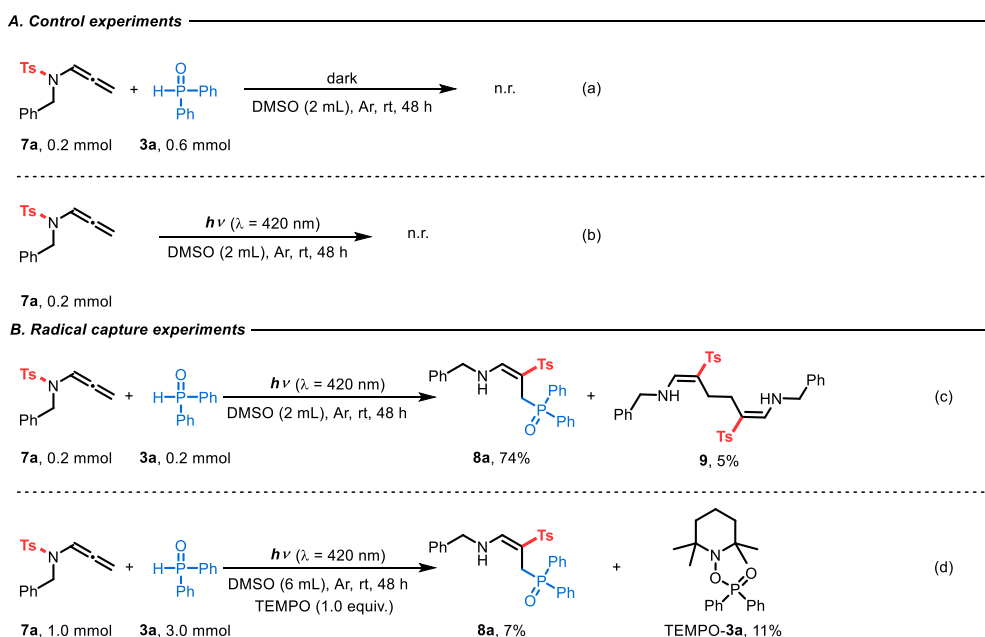

**Scheme S8.** Experiments relevant to the mechanism: terminal *N*-sulfonyl allenamide

**Scheme S8(a):** A 10 mL Pyrex tube equipped with a magnetic stirrer was charged with substrate **7a** (0.2 mmol, 1.0 equiv.) and H-phosphine oxide **3a** (0.6 mmol, 3.0 equiv.) in DMSO (2 mL). The mixture was bubbled with a stream of argon for 0.5 h. The sample was then stirred for 48 h in the dark. After reaction, the solution was extracted with CH<sub>2</sub>Cl<sub>2</sub> and washed with brine and dried with anhydrous Na<sub>2</sub>SO<sub>4</sub>. The residue was purified with chromatography column on silica gel using mixtures of ethyl acetate and petroleum to give the starting material **7a**.

**Scheme S8(b):** A 10 mL Pyrex tube equipped with a magnetic stirrer was charged with substrate **7a** (0.2 mmol) in DMSO (2 mL). The sample was bubbled with a stream of argon for 0.5 h, and then irradiated by LEDs ( $\lambda = 420 \pm 10$  nm) for 48 h. After reaction, the solution was extracted with CH<sub>2</sub>Cl<sub>2</sub> and washed with brine and dried with anhydrous Na<sub>2</sub>SO<sub>4</sub>. The residue was purified with chromatography column on silica gel using mixtures of ethyl acetate and petroleum to give the starting material **7a**.

**Scheme S8(c):** A 10 mL Pyrex tube equipped with a magnetic stirrer was charged with substrate **7a** (0.2 mmol, 1.0 equiv.) and H-phosphine oxide **3a** (0.2 mmol, 1.0 equiv.) in DMSO (2 mL). The mixture was bubbled with a stream of argon for 0.5 h. The sample was then irradiated by LEDs ( $\lambda = 420 \pm 10$  nm) for 48 h. After reaction, the solution was extracted with CH<sub>2</sub>Cl<sub>2</sub> and washed with brine and dried with anhydrous Na<sub>2</sub>SO<sub>4</sub>. Upon removal of solvent under vacuum, the residue was purified by column chromatography on silica gel using petroleum ether/ethyl acetate mixture as eluent affording the corresponding products **8a** (74.0 mg, 74% yield) and **9** (6.0 mg, 5% yield).

**Scheme S8(d):** A 10 mL Pyrex tube equipped with a magnetic stirrer was charged with substrate **7a** (1.0 mmol, 1.0 equiv.), H-phosphine oxide **3a** (3.0 mmol, 3.0 equiv.) and TEMPO (1.0 mmol, 1.0 equiv.) in DMSO (6 mL). The mixture was bubbled with a stream of argon for 0.5 h. The sample was then irradiated by LEDs ( $\lambda = 420 \pm 10$  nm) for 48 h. After reaction, the solution was extracted with CH<sub>2</sub>Cl<sub>2</sub> and washed with brine and dried with anhydrous Na<sub>2</sub>SO<sub>4</sub>. Upon removal of solvent under vacuum, the residue was purified by column chromatography on silica gel using petroleum ether/ethyl acetate mixture as eluent affording the corresponding products **8a** (35.0 mg, 7% yield) and TEMPO-**3a** (39.5 mg, 11% yield).

## 12. Limitations of the method: terminal *N*-sulfonyl allenamide

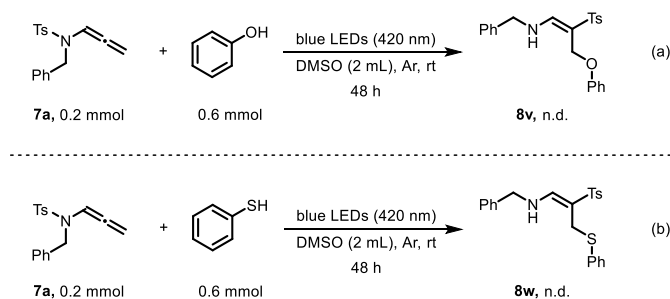

**Scheme S9.** Experiments relevant to the mechanism: terminal *N*-sulfonyl allenamide

**Scheme S9(a):** A 10 mL Pyrex tube equipped with a magnetic stirrer was charged with substrate **7a** (0.2 mmol, 1.0 equiv.) and phenol (0.6 mmol, 3.0 equiv.) in DMSO (2 mL). The mixture was bubbled with a stream of argon for 0.5 h, and then irradiated by LEDs ( $\lambda = 420 \pm 10$  nm) for 48 h. After reaction, the solution was extracted with  $\text{CH}_2\text{Cl}_2$  and washed with brine and dried with anhydrous  $\text{Na}_2\text{SO}_4$ . No corresponding product **8v** were formed.

**Scheme S9(b):** A 10 mL Pyrex tube equipped with a magnetic stirrer was charged with substrate **7a** (0.2 mmol, 1.0 equiv.) and thiophenol (0.6 mmol, 3.0 equiv.) in DMSO (2 mL). The mixture was bubbled with a stream of argon for 0.5 h, and then irradiated by LEDs ( $\lambda = 420 \pm 10$  nm) for 48 h. After reaction, the solution was extracted with  $\text{CH}_2\text{Cl}_2$  and washed with brine and dried with anhydrous  $\text{Na}_2\text{SO}_4$ . No corresponding product **8w** were formed.

### 13. Light on/off experiment

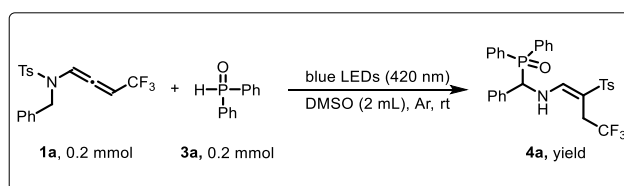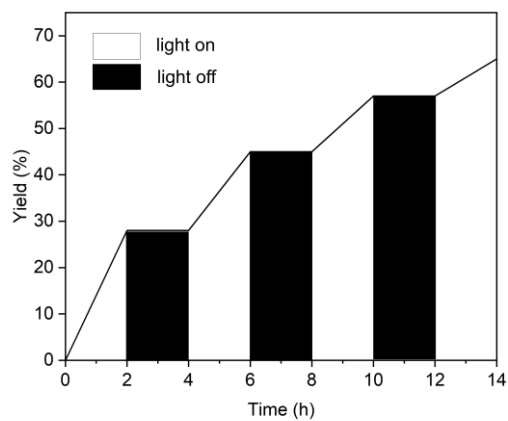

Figure S7. Light on/off experiment.

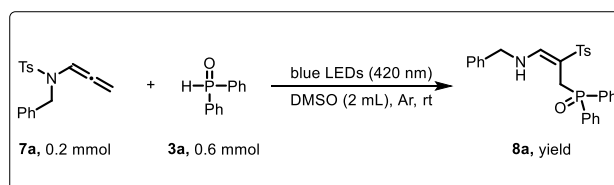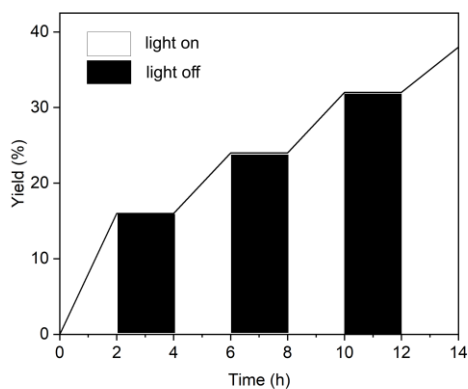

Figure S8. Light on/off experiment.



## 14. Characterization data for compounds

### Compound 1a *N*-benzyl-4-methyl-*N*-(4,4,4-trifluorobuta-1,2-dien-1-yl)benzenesulfonamide

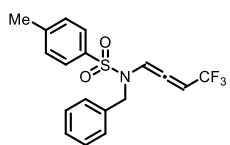

Chemical formula: C<sub>18</sub>H<sub>16</sub>F<sub>3</sub>NO<sub>2</sub>S

Molecular weight: 367.39 g.mol<sup>-1</sup>

White solid

Melting point: 88–90 °C

<sup>1</sup>H NMR (300 MHz, CDCl<sub>3</sub>) δ 7.79–7.67 (m, 2H), 7.45–7.38 (m, 1H), 7.38–7.32 (m, 2H), 7.30–7.18 (m, 5H), 5.68 (p, *J* = 5.6 Hz, 1H), 4.46 (d, *J* = 15.3 Hz, 1H), 4.12 (d, *J* = 15.3 Hz, 1H), 2.46 (s, 3H).

Data match with those described in the literature.<sup>6</sup>

### Compound 1b 4-Methyl-*N*-(4-methylbenzyl)-*N*-(4,4,4-trifluorobuta-1,2-dien-1-yl)benzenesulfonamide

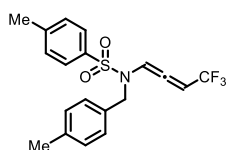

Chemical formula: C<sub>19</sub>H<sub>18</sub>F<sub>3</sub>NO<sub>2</sub>S

Molecular weight: 381.41 g.mol<sup>-1</sup>

White solid

Melting point: 86–88 °C

<sup>1</sup>H NMR (500 MHz, CDCl<sub>3</sub>) δ 7.73–7.71 (m, 2H), 7.41–7.37 (m, 1H), 7.36–7.30 (m, 2H), 7.18–7.05 (m, 4H), 5.70 (p, *J* = 5.5 Hz, 1H), 4.47 (d, *J* = 15.0 Hz, 1H), 4.06 (d, *J* = 15.0 Hz, 1H), 2.46 (s, 3H), 2.32 (s, 3H).

<sup>13</sup>C NMR (126 MHz, CDCl<sub>3</sub>) δ 199.2 (q, *J*<sub>C-F</sub> = 6.0 Hz), 144.6, 137.7, 135.2, 131.7, 130.1, 129.3, 127.8, 127.3, 121.3 (q, *J*<sub>C-F</sub> = 272.2 Hz), 106.9, 96.4 (q, *J*<sub>C-F</sub> = 39.3 Hz), 50.9, 21.7, 21.2.

<sup>19</sup>F NMR (282 MHz, CDCl<sub>3</sub>) δ -62.68 (s, 3F).

IR (neat): ν = 3032, 1428, 1362, 1119, 898, 745, 540 cm<sup>-1</sup>.

ESI-HRMS (ESI-TOF): *m/z* calcd for C<sub>19</sub>H<sub>18</sub>F<sub>3</sub>NNaO<sub>2</sub>S<sup>+</sup> [M+Na]<sup>+</sup>: 404.0903, found 404.0904.

### Compound 1c *N*-(4-methoxybenzyl)-4-methyl-*N*-(4,4,4-trifluorobuta-1,2-dien-1-yl)benzenesulfonamide

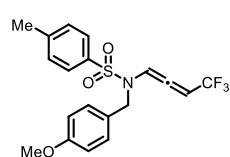

Chemical formula: C<sub>19</sub>H<sub>18</sub>F<sub>3</sub>NO<sub>3</sub>S

Molecular weight: 397.41 g.mol<sup>-1</sup>

White solid

Melting point: 97–99 °C

<sup>1</sup>H NMR (500 MHz, CDCl<sub>3</sub>) δ 7.72–7.70 (m, 2H), 7.39–7.33 (m, 3H), 7.18–7.15 (m, 2H), 6.82 (dt, *J* = 9.0 Hz, *J* = 3.0 Hz, 2H), 5.72 (p, *J* = 5.5 Hz, 1H), 4.42 (d, *J* = 16.0 Hz, 1H), 4.04 (d, *J* = 15.0 Hz, 1H), 3.78 (s, 3H), 2.45 (s, 3H).

<sup>13</sup>C NMR (126 MHz, CDCl<sub>3</sub>) δ 199.0 (q, *J*<sub>C-F</sub> = 5.9 Hz), 159.3, 144.5, 135.1, 130.0, 129.1, 127.2, 126.6, 121.2 (q, *J*<sub>C-F</sub> = 272.2 Hz), 113.9, 106.6, 96.2 (q, *J*<sub>C-F</sub> = 39.3 Hz), 55.3, 50.5, 21.6.

<sup>19</sup>F NMR (282 MHz, CDCl<sub>3</sub>) δ -62.64 (s, 3F).

IR (neat): ν = 3032, 1429, 1362, 1041, 898, 783, 538 cm<sup>-1</sup>.

ESI-HRMS (ESI-TOF): *m/z* calcd for C<sub>19</sub>H<sub>18</sub>F<sub>3</sub>NNaO<sub>3</sub>S<sup>+</sup> [M+Na]<sup>+</sup>: 420.0852, found 420.0848.

### Compound 1d 4-Methyl-*N*-(4,4,4-trifluorobuta-1,2-dien-1-yl)-*N*-(4-(trifluoromethyl)benzyl)benzenesulfonamide

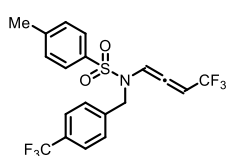

Chemical formula: C<sub>19</sub>H<sub>15</sub>F<sub>6</sub>NO<sub>2</sub>S

Molecular weight: 435.38 g.mol<sup>-1</sup>

White solid

Melting point: 102–104 °C

<sup>1</sup>H NMR (500 MHz, CDCl<sub>3</sub>) δ 7.72 (d, *J* = 8.0 Hz, 2H), 7.54 (d, *J* = 8.0 Hz, 2H), 7.45–7.43 (m, 1H), 7.36 (d, *J* = 8.0 Hz, 4H), 5.71 (p, *J* = 5.5 Hz, 1H), 4.45 (d, *J* = 16.0 Hz, 1H), 4.26 (d, *J* = 15.5 Hz, 1H), 2.46 (s, 3H).

<sup>13</sup>C NMR (126 MHz, CDCl<sub>3</sub>) δ 198.8 (q, *J*<sub>C-F</sub> = 5.8 Hz), 145.0, 139.0, 134.9, 130.3 (q, *J*<sub>C-F</sub> = 32.6 Hz), 130.3, 127.9, 127.3, 125.7 (q, *J*<sub>C-F</sub> = 3.8 Hz), 124.1 (q, *J*<sub>C-F</sub> = 272.5 Hz), 120.6 (q, *J*<sub>C-F</sub> = 272.2 Hz), 106.9, 96.9 (q, *J*<sub>C-F</sub> = 39.6 Hz), 50.6, 21.8.

<sup>19</sup>F NMR (471 MHz, CDCl<sub>3</sub>) δ -62.65 (s, 3F), -62.84 (s, 3F).

IR (neat): ν = 3043, 1451, 1351, 1124, 959, 704, 544 cm<sup>-1</sup>.

ESI-HRMS (ESI-TOF): *m/z* calcd for C<sub>19</sub>H<sub>15</sub>F<sub>6</sub>NNaO<sub>2</sub>S<sup>+</sup> [M+Na]<sup>+</sup>: 458.0620, found 458.0613.

**Compound 1e** 4-Methyl-*N*-(4,4,4-trifluorobuta-1,2-dien-1-yl)-*N*-(4-(trifluoromethoxy)benzyl)benzenesulfonamide

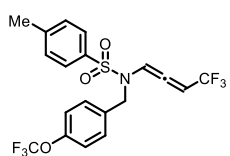

Chemical formula: C<sub>19</sub>H<sub>15</sub>F<sub>6</sub>NO<sub>3</sub>S

Molecular weight: 451.38 g.mol<sup>-1</sup>

White solid

Melting point: 79–81 °C

**<sup>1</sup>H NMR (500 MHz, C<sub>6</sub>D<sub>6</sub>)** δ 7.51 (dt, *J* = 8.5 Hz, *J* = 2.0 Hz, 2H), 7.24–7.21 (m, 1H), 6.95 (dt, *J* = 9.0 Hz, *J* = 3.0 Hz, 2H), 6.83 (d, *J* = 8.0 Hz, 2H), 6.75 (d, *J* = 8.5 Hz, 2H), 5.11 (p, *J* = 5.5 Hz, 1H), 3.97 (d, *J* = 15.5 Hz, 1H), 3.88 (d, *J* = 15.5 Hz, 1H), 1.86 (s, 3H).

**<sup>13</sup>C NMR (126 MHz, C<sub>6</sub>D<sub>6</sub>)** δ 199.0 (q, *J*<sub>C-F</sub> = 5.9 Hz), 149.0 (q, *J*<sub>C-F</sub> = 1.6 Hz), 144.4, 135.8, 134.0, 130.1, 129.3, 127.4, 121.7 (q, *J*<sub>C-F</sub> = 272.2 Hz), 121.3, 121.2 (q, *J*<sub>C-F</sub> = 257.3 Hz), 107.1, 96.2 (q, *J*<sub>C-F</sub> = 39.1 Hz), 50.3, 21.1.

**<sup>19</sup>F NMR (282 MHz, C<sub>6</sub>D<sub>6</sub>)** δ -57.85 (s, 3F), -62.84 (s, 3F).

**IR (neat):** ν = 3049, 1452, 1342, 1122, 949, 810, 543 cm<sup>-1</sup>.

**ESI-HRMS (ESI-TOF):** m/z calcd for C<sub>19</sub>H<sub>16</sub>F<sub>6</sub>NO<sub>3</sub>S<sup>+</sup> [M+H]<sup>+</sup>: 452.0750, found 452.0755.

**Compound 1f** *N*-(4-fluorobenzyl)-4-methyl-*N*-(4,4,4-trifluorobuta-1,2-dien-1-yl)benzenesulfonamide

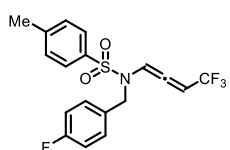

Chemical formula: C<sub>18</sub>H<sub>15</sub>F<sub>4</sub>NO<sub>2</sub>S

Molecular weight: 385.38 g.mol<sup>-1</sup>

White solid

Melting point: 99–101 °C

**<sup>1</sup>H NMR (500 MHz, CDCl<sub>3</sub>)** δ 7.72 (dt, *J* = 8.0 Hz, *J* = 2.5 Hz, 2H), 7.42–7.39 (m, 1H), 7.36 (d, *J* = 11.0 Hz, 2H), 7.23–7.20 (m, 2H), 7.00–6.95 (m, 2H), 5.71 (p, *J* = 6.0 Hz, 1H), 4.37 (d, *J* = 15.0 Hz, 1H), 4.14 (d, *J* = 15.0 Hz, 1H), 2.46 (s, 3H).

Data match with those described in the literature.<sup>7</sup>

**Compound 1g** *N*-(4-chlorobenzyl)-4-methyl-*N*-(4,4,4-trifluorobuta-1,2-dien-1-yl)benzenesulfonamide

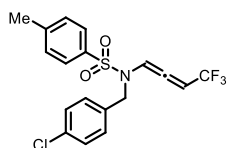

Chemical formula: C<sub>18</sub>H<sub>15</sub>ClF<sub>3</sub>NO<sub>2</sub>S

Molecular weight: 401.83 g.mol<sup>-1</sup>

White solid

Melting point: 94–96 °C

**<sup>1</sup>H NMR (500 MHz, CDCl<sub>3</sub>)** δ 7.72 (dt, *J* = 8.5 Hz, *J* = 2.0 Hz, 2H), 7.42–7.39 (m, 1H), 7.35 (d, *J* = 8.0 Hz, 2H), 7.25 (dt, *J* = 8.5 Hz, *J* = 2.5 Hz, 2H), 7.18 (dt, *J* = 8.5 Hz, *J* = 2.5 Hz, 2H), 5.71 (p, *J* = 5.5 Hz, 1H), 4.39 (d, *J* = 15.5 Hz, 1H), 4.12 (d, *J* = 15.5 Hz, 1H), 2.46 (s, 3H).

**<sup>13</sup>C NMR (126 MHz, CDCl<sub>3</sub>)** δ 198.9 (q, *J*<sub>C-F</sub> = 5.8 Hz), 144.9, 135.0, 133.8, 133.4, 130.3, 129.1, 128.8, 127.3, 121.1 (q, *J*<sub>C-F</sub> = 272.2 Hz), 106.8, 96.7 (q, *J*<sub>C-F</sub> = 39.4 Hz), 50.4, 21.7.

**<sup>19</sup>F NMR (282 MHz, CDCl<sub>3</sub>)** δ -62.73 (s, 3F).

**IR (neat):** ν = 3046, 1452, 1342, 1122, 947, 815, 542 cm<sup>-1</sup>.

**ESI-HRMS (ESI-TOF):** m/z calcd for C<sub>18</sub>H<sub>15</sub>ClF<sub>3</sub>NNaO<sub>2</sub>S<sup>+</sup> [M+Na]<sup>+</sup>: 424.0357, found 424.0353.

**Compound 1h** *N*-(4-bromobenzyl)-4-methyl-*N*-(4,4,4-trifluorobuta-1,2-dien-1-yl)benzenesulfonamide

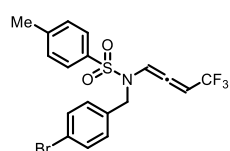

Chemical formula: C<sub>18</sub>H<sub>15</sub>BrF<sub>3</sub>NO<sub>2</sub>S

Molecular weight: 446.28 g.mol<sup>-1</sup>

White solid

Melting point: 95–97 °C

**<sup>1</sup>H NMR (500 MHz, CDCl<sub>3</sub>)** δ 7.71 (dt, *J* = 8.5 Hz, *J* = 2.0 Hz, 2H), 7.42–7.40 (m, 3H), 7.36–7.34 (m, 2H), 7.12 (dt, *J* = 8.5 Hz, *J* = 2.0 Hz, 2H), 5.71 (p, *J* = 5.5 Hz, 1H), 4.38 (d, *J* = 15.5 Hz, 1H), 4.09 (d, *J* = 15.5 Hz, 1H), 2.46 (s, 3H).

**<sup>13</sup>C NMR (126 MHz, CDCl<sub>3</sub>)** δ 198.9 (q, *J*<sub>C-F</sub> = 5.9 Hz), 144.9, 135.0, 133.9, 131.8, 130.3, 129.4, 127.3, 121.9, 121.1 (q, *J*<sub>C-F</sub> = 272.3 Hz), 106.9, 96.7 (q, *J*<sub>C-F</sub> = 39.4 Hz), 50.5, 21.8.

**<sup>19</sup>F NMR (282 MHz, CDCl<sub>3</sub>)** δ -62.71 (s, 3F).

**IR (neat):** ν = 3039, 1430, 1312, 1119, 898, 665, 595 cm<sup>-1</sup>.

**ESI-HRMS (ESI-TOF):** m/z calcd for C<sub>18</sub>H<sub>15</sub>BrF<sub>3</sub>NNaO<sub>2</sub>S<sup>+</sup> [M+Na]<sup>+</sup>: 467.9851, found 467.9851.

**Compound 1i** 4-Methyl-*N*-(2-methylbenzyl)-*N*-(4,4,4-trifluorobuta-1,2-dien-1-yl)benzenesulfonamide

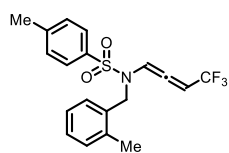

Chemical formula: C<sub>19</sub>H<sub>18</sub>F<sub>3</sub>NO<sub>2</sub>S

Molecular weight: 381.41 g.mol<sup>-1</sup>

White solid

Melting point: 112–114 °C

**<sup>1</sup>H NMR (500 MHz, CDCl<sub>3</sub>)** δ 7.73 (d, *J* = 8.5 Hz, 2H), 7.44–7.40 (m, 1H), 7.36 (d, *J* = 8.0 Hz, 2H), 7.26–7.24 (m, 1H), 7.17–7.08 (m, 3H), 5.61 (p, *J* = 5.5 Hz, 1H), 4.46 (d, *J* = 16.0 Hz, 1H), 4.17 (d, *J* = 15.5 Hz, 1H), 2.47 (s, 3H), 2.22 (s, 3H).

**<sup>13</sup>C NMR (126 MHz, CDCl<sub>3</sub>)** δ 199.0 (q, *J*<sub>C-F</sub> = 5.9 Hz), 144.7, 135.5, 135.0, 132.2, 130.5, 130.2, 127.7, 127.3, 127.0, 126.2, 121.2 (q, *J*<sub>C-F</sub> = 272.2 Hz), 106.8, 96.1 (q, *J*<sub>C-F</sub> = 39.4 Hz), 48.7, 21.7, 19.2.

**<sup>19</sup>F NMR (471 MHz, CDCl<sub>3</sub>)** δ -62.68 (s, 3F).

**IR (neat):** ν = 3045, 1450, 1343, 1118, 948, 764, 599 cm<sup>-1</sup>.

**ESI-HRMS (ESI-TOF):** m/z calcd for C<sub>19</sub>H<sub>18</sub>F<sub>3</sub>NNaO<sub>2</sub>S<sup>+</sup> [M+Na]<sup>+</sup>: 404.0903, found 404.0901.

**Compound 1j** *N*-(2-fluorobenzyl)-4-methyl-*N*-(4,4,4-trifluorobuta-1,2-dien-1-yl)benzenesulfonamide

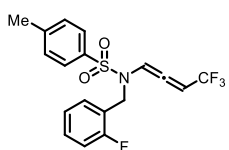

Chemical formula: C<sub>18</sub>H<sub>15</sub>F<sub>4</sub>NO<sub>2</sub>S

Molecular weight: 385.38 g.mol<sup>-1</sup>

White solid

Melting point: 85–87 °C

**<sup>1</sup>H NMR (300 MHz, CDCl<sub>3</sub>)** δ 7.74 (dt, *J* = 8.4 Hz, *J* = 1.8 Hz, 2H), 7.45–7.34 (m, 4H), 7.28–7.21 (m, 1H), 7.14–7.08 (m, 1H), 7.00–6.94 (m, 1H), 5.71 (p, *J* = 5.4 Hz, 1H), 4.44–4.30 (m, 2H), 2.46 (s, 3H).

**<sup>13</sup>C NMR (126 MHz, CDCl<sub>3</sub>)** δ 198.3 (q, *J*<sub>C-F</sub> = 5.8 Hz), 160.4 (d, *J*<sub>C-F</sub> = 247.1 Hz), 144.9, 135.0, 130.3, 129.6 (d, *J*<sub>C-F</sub> = 8.3 Hz), 129.0 (d, *J*<sub>C-F</sub> = 3.4 Hz), 127.3, 124.5 (d, *J*<sub>C-F</sub> = 3.7 Hz), 121.9 (d, *J*<sub>C-F</sub> = 13.4 Hz), 121.1 (q, *J*<sub>C-F</sub> = 272.3 Hz), 115.4 (d, *J*<sub>C-F</sub> = 21.4 Hz), 106.6, 96.6 (q, *J*<sub>C-F</sub> = 39.6 Hz), 44.1 (d, *J*<sub>C-F</sub> = 5.3 Hz), 21.8.

**<sup>19</sup>F NMR (282 MHz, CDCl<sub>3</sub>)** δ -62.90 (s, 3F), -118.63 (s, 1F).

**IR (neat):** ν = 3036, 1429, 1355, 1102, 945, 759, 545 cm<sup>-1</sup>.

**ESI-HRMS (ESI-TOF):** m/z calcd for C<sub>18</sub>H<sub>15</sub>F<sub>4</sub>NNaO<sub>2</sub>S<sup>+</sup> [M+Na]<sup>+</sup>: 408.0652, found 408.0648.

**Compound 1k** *N*-(2-chlorobenzyl)-4-methyl-*N*-(4,4,4-trifluorobuta-1,2-dien-1-yl)benzenesulfonamide

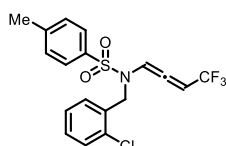

Chemical formula: C<sub>18</sub>H<sub>15</sub>ClF<sub>3</sub>NO<sub>2</sub>S

Molecular weight: 401.83 g.mol<sup>-1</sup>

White solid

Melting point: 86–88 °C

**<sup>1</sup>H NMR (400 MHz, CDCl<sub>3</sub>)** δ 7.75 (dt, *J* = 8.4 Hz, *J* = 2.0 Hz, 2H), 7.46–7.42 (m, 2H), 7.38 (d, *J* = 8.0 Hz, 2H), 7.30 (dd, *J* = 7.6 Hz, *J* = 1.6 Hz, 1H), 7.24–7.17 (m, 2H), 5.68 (p, *J* = 5.6 Hz, 1H), 4.43 (s, 2H), 2.47 (s, 3H).

**<sup>13</sup>C NMR (126 MHz, CDCl<sub>3</sub>)** δ 198.4 (q, *J*<sub>C-F</sub> = 5.9 Hz), 144.9, 135.0, 132.6, 132.1, 130.3, 129.5, 129.0, 128.1, 127.3, 127.2, 121.0 (q, *J*<sub>C-F</sub> = 272.4 Hz), 106.8, 96.6 (q, *J*<sub>C-F</sub> = 39.6 Hz), 48.2, 21.8.

**<sup>19</sup>F NMR (282 MHz, CDCl<sub>3</sub>)** δ -62.80 (s, 3F).

**IR (neat):** ν = 3019, 1446, 1351, 1110, 921, 753, 540 cm<sup>-1</sup>.

**ESI-HRMS (ESI-TOF):** m/z calcd for C<sub>18</sub>H<sub>15</sub>ClF<sub>3</sub>NNaO<sub>2</sub>S<sup>+</sup> [M+Na]<sup>+</sup>: 424.0357, found 424.0353.

**Compound 1l** *N*-(2-bromobenzyl)-4-methyl-*N*-(4,4,4-trifluorobuta-1,2-dien-1-yl)benzenesulfonamide

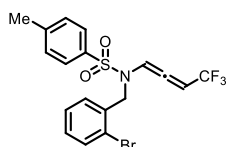

Chemical formula: C<sub>18</sub>H<sub>15</sub>BrF<sub>3</sub>NO<sub>2</sub>S

Molecular weight: 446.28 g.mol<sup>-1</sup>

White solid

Melting point: 94–96 °C

**<sup>1</sup>H NMR (500 MHz, CDCl<sub>3</sub>)** δ 7.75 (dt, *J* = 8.5 Hz, *J* = 2.0 Hz, 2H), 7.49 (dd, *J* = 8.0 Hz, *J* = 1.5 Hz, 1H), 7.46–7.44 (m, 1H), 7.42–7.41 (m, 1H), 7.39–7.36 (m, 2H), 7.30–7.27 (m, 1H), 7.14–7.10 (m, 1H), 5.69 (p, *J* = 5.5 Hz, 1H), 4.41 (s, 2H), 2.47 (s, 3H).

Data match with those described in the literature.<sup>7</sup>

**Compound 1m** *N*-(benzo[d][1,3]dioxol-5-ylmethyl)-4-methyl-*N*-(4,4,4-trifluorobuta-1,2-dien-1-yl)benzenesulfonamide

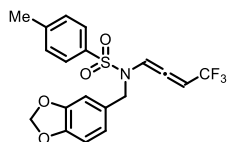

Chemical formula: C<sub>19</sub>H<sub>16</sub>F<sub>3</sub>NO<sub>4</sub>S  
Molecular weight: 411.39 g.mol<sup>-1</sup>  
White solid  
Melting point: 110–112 °C

**<sup>1</sup>H NMR (400 MHz, CDCl<sub>3</sub>)** δ 7.71 (d, *J* = 8.1 Hz, 2H), 7.41–7.37 (m, 1H), 7.35 (d, *J* = 8.1 Hz, 2H), 6.77 (d, *J* = 1.7 Hz, 1H), 6.73–6.62 (m, 2H), 5.93 (s, 2H), 5.75 (p, *J* = 5.6 Hz, 1H), 4.34 (d, *J* = 15.0 Hz, 1H), 4.06 (d, *J* = 15.0 Hz, 1H), 2.45 (s, 3H).  
Data match with those described in the literature.<sup>6</sup>

**Compound 1n** *N*-(3,5-difluorobenzyl)-4-methyl-*N*-(4,4,4-trifluorobuta-1,2-dien-1-yl)benzenesulfonamide

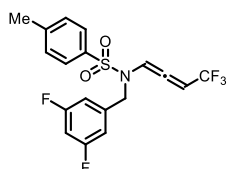

Chemical formula: C<sub>18</sub>H<sub>14</sub>F<sub>5</sub>NO<sub>2</sub>S  
Molecular weight: 403.37 g.mol<sup>-1</sup>  
White solid  
Melting point: 84–86 °C

**<sup>1</sup>H NMR (300 MHz, CDCl<sub>3</sub>)** δ 7.72 (dt, *J* = 8.4 Hz, *J* = 1.8 Hz, 2H), 7.46–7.41 (m, 1H), 7.39–7.35 (m, 2H), 6.79–6.66 (m, 3H), 5.75 (p, *J* = 5.4 Hz, 1H), 4.34–4.19 (m, 2H), 2.47 (s, 3H).

**<sup>13</sup>C NMR (126 MHz, CDCl<sub>3</sub>)** δ 198.7 (q, *J*<sub>C-F</sub> = 5.7 Hz), 163.3 (dd, *J*<sub>C-F</sub> = 249.7 Hz, *J*<sub>C-F</sub> = 12.7 Hz), 145.1, 138.9 (t, *J*<sub>C-F</sub> = 9.1 Hz), 134.9, 130.4, 127.3, 121.0 (q, *J*<sub>C-F</sub> = 272.3 Hz), 110.4 (dd, *J*<sub>C-F</sub> = 20.0 Hz, *J*<sub>C-F</sub> = 6.3 Hz), 106.8, 103.5 (t, *J*<sub>C-F</sub> = 25.3 Hz), 96.9 (q, *J*<sub>C-F</sub> = 39.4 Hz), 50.3 (t, *J*<sub>C-F</sub> = 2.4 Hz), 21.8.

**<sup>19</sup>F NMR (282 MHz, CDCl<sub>3</sub>)** δ -62.91 (s, 3F), -109.28 (s, 2F).

**IR (neat):** ν = 3020, 1445, 1353, 1119, 917, 684, 541 cm<sup>-1</sup>.

**ESI-HRMS (ESI-TOF):** *m/z* calcd for C<sub>18</sub>H<sub>14</sub>F<sub>5</sub>NNaO<sub>2</sub>S<sup>+</sup> [*M*+*Na*]<sup>+</sup>: 426.0558, found 426.0549.

**Compound 1o** *N*-(3,4-dichlorobenzyl)-4-methyl-*N*-(4,4,4-trifluorobuta-1,2-dien-1-yl)benzenesulfonamide

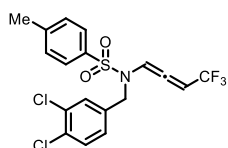

Chemical formula: C<sub>18</sub>H<sub>14</sub>Cl<sub>2</sub>F<sub>3</sub>NO<sub>2</sub>S  
Molecular weight: 436.27 g.mol<sup>-1</sup>  
White solid  
Melting point: 100–102 °C

**<sup>1</sup>H NMR (500 MHz, CDCl<sub>3</sub>)** δ 7.70 (dt, *J* = 8.5 Hz, *J* = 2.0 Hz, 2H), 7.44–7.41 (m, 1H), 7.36–7.34 (m, 3H), 7.27 (d, *J* = 2.5 Hz, 1H), 7.07 (dd, *J* = 8.5 Hz, *J* = 2.5 Hz, 1H), 5.75 (p, *J* = 5.5 Hz, 1H), 4.34 (d, *J* = 15.5 Hz, 1H), 4.18 (d, *J* = 15.5 Hz, 1H), 2.46 (s, 3H).

**<sup>13</sup>C NMR (126 MHz, CDCl<sub>3</sub>)** δ 198.7 (q, *J*<sub>C-F</sub> = 5.9 Hz), 145.1, 135.2, 134.9, 132.9, 132.1, 130.6, 130.3, 129.6, 127.2, 127.0, 121.1 (q, *J*<sub>C-F</sub> = 272.3 Hz), 106.9, 96.9 (q, *J*<sub>C-F</sub> = 39.3 Hz), 49.9, 21.7.

**<sup>19</sup>F NMR (471 MHz, CDCl<sub>3</sub>)** δ -62.75 (s, 3F).

**IR (neat):** ν = 3013, 1428, 1359, 1098, 919, 662, 586 cm<sup>-1</sup>.

**ESI-HRMS (ESI-TOF):** *m/z* calcd for C<sub>18</sub>H<sub>14</sub>Cl<sub>2</sub>F<sub>3</sub>NNaO<sub>2</sub>S<sup>+</sup> [*M*+*Na*]<sup>+</sup>: 457.9967, found 457.9961.

**Compound 1q** 4-Methyl-*N*-(naphthalen-1-ylmethyl)-*N*-(4,4,4-trifluorobuta-1,2-dien-1-yl)benzenesulfonamide

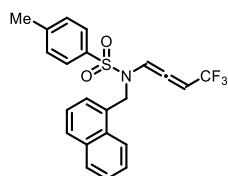

Chemical formula: C<sub>22</sub>H<sub>18</sub>F<sub>3</sub>NO<sub>2</sub>S  
Molecular weight: 417.45 g.mol<sup>-1</sup>  
White solid  
Melting point: 108–110 °C

**<sup>1</sup>H NMR (500 MHz, CDCl<sub>3</sub>)** δ 8.01–7.99 (m, 1H), 7.87–7.85 (m, 1H), 7.79–7.75 (m, 3H), 7.53–7.45 (m, 4H), 7.41–7.38 (m, 1H), 7.35–7.33 (m, 2H), 5.55 (p, *J* = 5.5 Hz, 1H), 4.95 (d, *J* = 15.5 Hz, 1H), 4.67 (d, *J* = 15.5 Hz, 1H), 2.46 (s, 3H).

**<sup>13</sup>C NMR (126 MHz, CDCl<sub>3</sub>)** δ 199.1 (q, *J*<sub>C-F</sub> = 5.9 Hz), 144.7, 134.7, 133.8, 130.9, 130.1, 129.3, 128.9, 128.7, 127.4, 126.4, 125.9, 125.9, 125.2, 122.7, 121.1 (q, *J*<sub>C-F</sub> = 272.4 Hz), 106.8, 96.2 (q, *J*<sub>C-F</sub> = 39.3 Hz), 49.1, 21.7.

**<sup>19</sup>F NMR (471 MHz, CDCl<sub>3</sub>)** δ -62.53 (s, 3F).

**IR (neat):** ν = 3031, 1442, 1353, 1114, 903, 778, 545 cm<sup>-1</sup>.

**ESI-HRMS (ESI-TOF):** *m/z* calcd for C<sub>22</sub>H<sub>18</sub>F<sub>3</sub>NNaO<sub>2</sub>S<sup>+</sup> [*M*+*Na*]<sup>+</sup>: 440.0903, found 440.0896.

**Compound 1r** *N*-benzyl-*N*-(4,4-difluorobuta-1,2-dien-1-yl)-4-methylbenzenesulfonamide

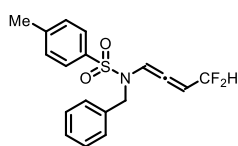

Chemical formula: C<sub>18</sub>H<sub>17</sub>F<sub>2</sub>NO<sub>2</sub>S  
Molecular weight: 349.40 g.mol<sup>-1</sup>  
Colorless oil

<sup>1</sup>H NMR (CDCl<sub>3</sub>, 500 MHz) δ 7.76 (d, *J* = 8.3 Hz, 2H), 7.39 (d, *J* = 8.0 Hz, 2H), 7.35–7.26 (m, 5H), 7.23 (dd, *J* = 11.0 Hz, *J* = 5.7 Hz, 1H), 5.68 (p, *J* = 6.0 Hz, 1H), 5.39 (td, *J* = 56.0 Hz, *J* = 6.0 Hz, 1H), 4.48 (d, *J* = 15.1 Hz, 1H), 4.18 (d, *J* = 15.1 Hz, 1H), 2.49 (s, 3H).  
Data match with those described in the literature.<sup>4</sup>

**Compound 1s** 4-Methyl-*N*-phenethyl-*N*-(4,4,4-trifluorobuta-1,2-dien-1-yl)benzenesulfonamide

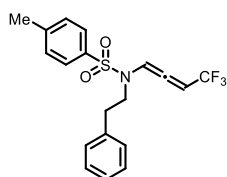

Chemical formula: C<sub>19</sub>H<sub>18</sub>F<sub>3</sub>NO<sub>2</sub>S  
Molecular weight: 381.41 g.mol<sup>-1</sup>  
White solid  
Melting point: 90–92 °C

<sup>1</sup>H NMR (500 MHz, CDCl<sub>3</sub>) δ 7.74–7.63 (m, 2H), 7.46 (dq, *J* = 6.2 Hz, *J* = 3.1 Hz, 1H), 7.32 (d, *J* = 8.1 Hz, 2H), 7.31–7.27 (m, 2H), 7.24–7.18 (m, 1H), 7.17–7.09 (m, 2H), 5.99 (p, *J* = 5.6 Hz, 1H), 3.37–3.23 (m, 2H), 2.90–2.77 (m, 2H), 2.43 (s, 3H).  
Data match with those described in the literature.<sup>6</sup>

**Compound 1t** *N*-benzyl-*N*-(4,4,4-trifluorobuta-1,2-dien-1-yl)-2-(trifluoromethyl)benzenesulfonamide

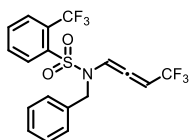

Chemical formula: C<sub>18</sub>H<sub>13</sub>F<sub>6</sub>NO<sub>2</sub>S  
Molecular weight: 421.36 g.mol<sup>-1</sup>  
White solid  
Melting point: 99–101 °C

<sup>1</sup>H NMR (500 MHz, CDCl<sub>3</sub>) δ 7.97 (d, *J* = 7.5 Hz, 1H), 7.86 (d, *J* = 6.0 Hz, 1H), 7.68–7.61 (m, 2H), 7.37–7.34 (m, 1H), 7.22–7.15 (m, 5H), 5.68 (p, *J* = 5.5 Hz, 1H), 4.57 (d, *J* = 15.5 Hz, 1H), 4.30 (d, *J* = 15.5 Hz, 1H).

<sup>13</sup>C NMR (126 MHz, CDCl<sub>3</sub>) δ 198.2 (q, *J*<sub>C-F</sub> = 5.9 Hz), 137.9, 134.4, 133.5, 132.7, 131.1, 129.0 (q, *J*<sub>C-F</sub> = 6.4 Hz), 128.7, 128.3 (q, *J*<sub>C-F</sub> = 33.5 Hz), 128.1, 127.6, 122.5 (q, *J*<sub>C-F</sub> = 274.7 Hz), 121.2 (q, *J*<sub>C-F</sub> = 272.2 Hz), 106.8, 96.9 (q, *J*<sub>C-F</sub> = 39.4 Hz), 51.5.

<sup>19</sup>F NMR (282 MHz, CDCl<sub>3</sub>) δ -57.64 (s, 3F), -62.73 (s, 3F).

IR (neat): ν = 3018, 1455, 1350, 1028, 878, 734, 646 cm<sup>-1</sup>.

ESI-HRMS (ESI-TOF): *m/z* calcd for C<sub>18</sub>H<sub>13</sub>F<sub>6</sub>NNaO<sub>2</sub>S<sup>+</sup> [*M*+Na]<sup>+</sup>: 444.0463, found 444.0464.

**Compound 1u** *N*-benzyl-2,6-difluoro-*N*-(4,4,4-trifluorobuta-1,2-dien-1-yl)benzenesulfonamide

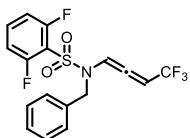

Chemical formula: C<sub>17</sub>H<sub>12</sub>F<sub>5</sub>NO<sub>2</sub>S  
Molecular weight: 389.34 g.mol<sup>-1</sup>  
Colorless oil

<sup>1</sup>H NMR (500 MHz, CDCl<sub>3</sub>) δ 7.56–7.50 (m, 1H), 7.43–7.41 (m, 1H), 7.27–7.23 (m, 5H), 7.04–7.00 (m, 2H), 5.77 (p, *J* = 5.5 Hz, 1H), 4.67 (d, *J* = 15.5 Hz, 1H), 4.41 (d, *J* = 15.5 Hz, 1H).

<sup>13</sup>C NMR (126 MHz, CDCl<sub>3</sub>) δ 198.4 (q, *J*<sub>C-F</sub> = 6.0 Hz), 159.6 (dd, *J*<sub>C-F</sub> = 260.8 Hz, *J*<sub>C-F</sub> = 3.7 Hz), 135.6 (t, *J*<sub>C-F</sub> = 11.1 Hz), 134.4, 128.7, 128.1, 127.8, 121.2 (q, *J*<sub>C-F</sub> = 272.2 Hz), 116.8 (t, *J*<sub>C-F</sub> = 16.0 Hz), 113.5 (dd, *J*<sub>C-F</sub> = 22.9 Hz, *J*<sub>C-F</sub> = 4.2 Hz), 106.5, 96.9 (q, *J*<sub>C-F</sub> = 39.4 Hz), 51.2 (t, *J*<sub>C-F</sub> = 1.5 Hz).

<sup>19</sup>F NMR (282 MHz, CDCl<sub>3</sub>) δ -62.70 (s, 3F), -105.45 (s, 2F).

IR (neat): ν = 3062, 1469, 1374, 1124, 933, 789, 597 cm<sup>-1</sup>.

ESI-HRMS (ESI-TOF): *m/z* calcd for C<sub>17</sub>H<sub>12</sub>F<sub>5</sub>NNaO<sub>2</sub>S<sup>+</sup> [*M*+Na]<sup>+</sup>: 412.0402, found 412.0395.

**Compound 1v** *N*-benzyl-*N*-(4,4,4-trifluorobuta-1,2-dien-1-yl)naphthalene-2-sulfonamide

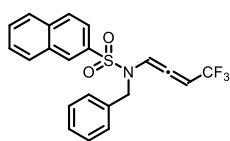

Chemical Formula: C<sub>21</sub>H<sub>16</sub>F<sub>3</sub>NO<sub>2</sub>S

Molecular weight: 403.42 g.mol<sup>-1</sup>

White solid

Melting point: 100–102 °C

**<sup>1</sup>H NMR (500 MHz, CDCl<sub>3</sub>)** δ 8.42 (d, *J* = 2.0 Hz, 1H), 8.01–7.93 (m, 3H), 7.79 (dd, *J* = 8.5 Hz, *J* = 2.0 Hz, 1H), 7.71–7.63 (m, 2H), 7.52–7.49 (m, 1H), 7.29–7.22 (m, 5H), 5.69 (p, *J* = 5.5 Hz, 1H), 4.52 (d, *J* = 15.0 Hz, 1H), 4.23 (d, *J* = 15.0 Hz, 1H).

**<sup>13</sup>C NMR (126 MHz, CDCl<sub>3</sub>)** δ 199.0 (q, *J*<sub>C-F</sub> = 5.9 Hz), 135.2, 135.0, 134.7, 132.3, 130.0, 129.5, 129.5, 129.0, 128.7, 128.1, 128.0, 128.0, 127.7, 122.0, 121.2 (q, *J*<sub>C-F</sub> = 272.3 Hz), 106.9, 96.6 (q, *J*<sub>C-F</sub> = 39.3 Hz), 51.2.

**<sup>19</sup>F NMR (471 MHz, CDCl<sub>3</sub>)** δ -62.71 (s, 3F).

**IR (neat):** ν = 3034, 1446, 1353, 1114, 923, 743, 587 cm<sup>-1</sup>.

**ESI-HRMS (ESI-TOF):** m/z calcd for C<sub>21</sub>H<sub>16</sub>F<sub>3</sub>NNaO<sub>2</sub>S<sup>+</sup> [M+Na]<sup>+</sup>: 426.0747, found 426.0739.

**Compound 1w** *N*-benzyl-*N*-(4,4,4-trifluorobuta-1,2-dien-1-yl)methanesulfonamide

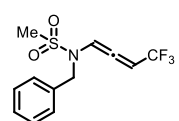

Chemical formula: C<sub>12</sub>H<sub>12</sub>F<sub>3</sub>NO<sub>2</sub>S

Molecular weight: 291.29 g.mol<sup>-1</sup>

White solid

Melting point: 64–67 °C

**<sup>1</sup>H NMR (500 MHz, CDCl<sub>3</sub>)** δ 7.56–7.13 (m, 6H), 5.85 (p, *J* = 5.6 Hz, 1H), 4.66 (d, *J* = 15.3 Hz, 1H), 4.41 (d, *J* = 15.3 Hz, 1H), 2.93 (s, 3H).

Data match with those described in the literature.<sup>6</sup>

**Compound 1x** *N*-benzyl-*N*-(4,4,4-trifluorobuta-1,2-dien-1-yl)cyclopropanesulfonamide

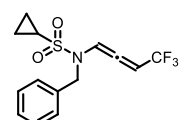

Chemical formula: C<sub>14</sub>H<sub>14</sub>F<sub>3</sub>NO<sub>2</sub>S

Molecular weight: 317.33 g.mol<sup>-1</sup>

White solid

Melting point: 73–75 °C

**<sup>1</sup>H NMR (500 MHz, CDCl<sub>3</sub>)** δ 7.30–7.25 (m, 4H), 7.24–7.20 (m, 2H), 5.73 (p, *J* = 5.5 Hz, 1H), 4.64 (d, *J* = 15.5 Hz, 1H), 4.38 (d, *J* = 15.5 Hz, 1H), 2.35–2.30 (m, 1H), 1.22–1.18 (m, 2H), 1.00–0.96 (m, 2H).

Data match with those described in the literature.<sup>7</sup>

**Compound 1y** *N*-benzyl-*N*-(4,4,4-trifluorobuta-1,2-dien-1-yl)thiophene-2-sulfonamide

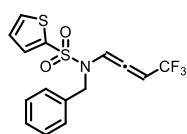

Chemical formula: C<sub>15</sub>H<sub>12</sub>F<sub>3</sub>NO<sub>2</sub>S<sub>2</sub>

Molecular weight: 359.38 g.mol<sup>-1</sup>

White solid

Melting point: 68–70 °C

**<sup>1</sup>H NMR (500 MHz, CDCl<sub>3</sub>)** δ 7.67 (dd, *J* = 5.0 Hz, *J* = 1.5 Hz, 1H), 7.62 (dd, *J* = 4.0 Hz, *J* = 1.5 Hz, 1H), 7.35–7.32 (m, 1H), 7.31–7.24 (m, 5H), 7.14 (dd, *J* = 5.0 Hz, *J* = 3.5 Hz, 1H), 5.72 (p, *J* = 6.0 Hz, 1H), 4.53 (d, *J* = 15.0 Hz, 1H), 4.21 (d, *J* = 15.0 Hz, 1H).

Data match with those described in the literature.<sup>7</sup>

**Compound 4a** (*E*)-diphenyl(phenyl)((4,4,4-trifluoro-2-tosylbut-1-en-1-yl)amino)methyl)phosphine oxide

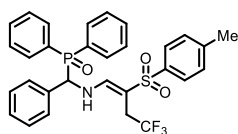

Chemical formula: C<sub>30</sub>H<sub>27</sub>F<sub>3</sub>NO<sub>3</sub>PS

Molecular weight: 569.58 g.mol<sup>-1</sup>

White solid

Melting point: 242–244 °C

Yield: 86%

**<sup>1</sup>H NMR (500 MHz, DMSO)** δ 8.10–8.04 (m, 3H), 7.83–7.75 (m, 3H), 7.65–7.62 (m, 1H), 7.57–7.54 (m, 2H), 7.50–7.40 (m, 5H), 7.32–7.28 (m, 4H), 7.24–7.19 (m, 3H), 6.17 (dd, *J* = 9.5 Hz, *J* = 7.0 Hz, 1H), 3.32–3.25 (m, 1H), 3.10–3.00 (m, 1H), 2.37 (s, 3H).

**<sup>13</sup>C NMR (126 MHz, DMSO)** δ 151.5 (d, *J*<sub>C-P</sub> = 5.8 Hz), 141.9, 140.7, 135.5, 131.9 (d, *J*<sub>C-P</sub> = 2.5 Hz), 131.8 (d, *J*<sub>C-P</sub> = 2.5 Hz), 131.4 (d, *J*<sub>C-P</sub> = 94.5 Hz), 131.3 (d, *J*<sub>C-P</sub> = 94.5 Hz), 131.1 (d, *J*<sub>C-P</sub> = 8.7 Hz), 130.9 (d, *J*<sub>C-P</sub> = 8.9 Hz), 129.2, 128.9 (d, *J*<sub>C-P</sub> = 4.9 Hz), 128.6 (d, *J*<sub>C-P</sub>

= 11.3 Hz), 128.4 (d,  $J_{C-P}$  = 11.3 Hz), 127.9, 127.7, 126.0, 125.9 (q,  $J_{C-F}$  = 280.5 Hz), 94.1, 61.5 (d,  $J_{C-P}$  = 74.1 Hz), 28.4 (q,  $J_{C-F}$  = 30.9 Hz), 20.9.

**<sup>19</sup>F NMR (471 MHz, DMSO)**  $\delta$  -63.12 (s, 3F).

**<sup>31</sup>P NMR (202 MHz, DMSO)**  $\delta$  29.16 (s, 1P).

**IR (neat):**  $\nu$  = 3270, 1638, 1254, 1131, 1082, 700, 546  $\text{cm}^{-1}$ .

**ESI-HRMS (ESI-TOF):**  $m/z$  calcd for  $\text{C}_{30}\text{H}_{27}\text{F}_3\text{NNaO}_3\text{PS}^+$  [M+Na]<sup>+</sup>: 592.1294, found 592.1289.

**Compound 4b** (*E*)-diphenyl(*p*-tolyl((4,4,4-trifluoro-2-tosylbut-1-en-1-yl)amino)methyl)phosphine oxide

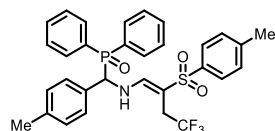

Chemical Formula:  $\text{C}_{31}\text{H}_{29}\text{F}_3\text{NO}_3\text{PS}$

Molecular weight: 583.61  $\text{g}\cdot\text{mol}^{-1}$

White solid

Melting point: 265–267 °C

Yield: 93%

**<sup>1</sup>H NMR (500 MHz, DMSO)**  $\delta$  8.06–7.99 (m, 3H), 7.85–7.81 (m, 2H), 7.74 (d,  $J$  = 13.5 Hz, 1H), 7.64–7.61 (m, 1H), 7.56–7.52 (m, 2H), 7.50–7.41 (m, 3H), 7.35–7.28 (m, 6H), 7.02 (d,  $J$  = 8.0 Hz, 2H), 6.12 (dd,  $J$  = 9.5 Hz,  $J$  = 7.0 Hz, 1H), 3.31–3.23 (m, 1H), 3.09–3.00 (m, 1H), 2.36 (s, 3H), 2.20 (s, 3H).

**<sup>13</sup>C NMR (126 MHz, DMSO)**  $\delta$  151.4 (d,  $J_{C-P}$  = 5.8 Hz), 142.0, 140.7, 137.0, 132.5, 131.9 (d,  $J_{C-P}$  = 2.5 Hz), 131.8 (d,  $J_{C-P}$  = 2.5 Hz), 131.6 (d,  $J_{C-P}$  = 96.3 Hz), 131.5 (d,  $J_{C-P}$  = 96.3 Hz), 131.1 (d,  $J_{C-P}$  = 8.9 Hz), 130.9 (d,  $J_{C-P}$  = 8.9 Hz), 129.3, 128.9 (d,  $J_{C-P}$  = 4.9 Hz), 128.6, 128.5 (d,  $J_{C-P}$  = 4.5 Hz), 128.4, 126.1, 125.9 (q,  $J_{C-F}$  = 280.1 Hz), 94.0, 61.1 (d,  $J_{C-P}$  = 74.6 Hz), 28.4 (q,  $J_{C-F}$  = 31.4 Hz), 21.0, 20.7.

**<sup>19</sup>F NMR (282 MHz, DMSO)**  $\delta$  -63.11 (s, 3F).

**<sup>31</sup>P NMR (121 MHz, DMSO)**  $\delta$  29.01 (s, 1P).

**IR (neat):**  $\nu$  = 3228, 1634, 1270, 1123, 1087, 660, 538  $\text{cm}^{-1}$ .

**ESI-HRMS (ESI-TOF):**  $m/z$  calcd for  $\text{C}_{31}\text{H}_{29}\text{F}_3\text{NNaO}_3\text{PS}^+$  [M+Na]<sup>+</sup>: 606.1450, found 606.1437.

**Compound 4c** (*E*)-((4-methoxyphenyl)((4,4,4-trifluoro-2-tosylbut-1-en-1-yl)amino)methyl)diphenylphosphine oxide

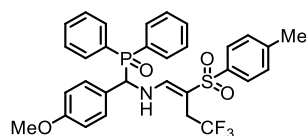

Chemical formula:  $\text{C}_{31}\text{H}_{29}\text{F}_3\text{NO}_4\text{PS}$

Molecular weight: 599.61  $\text{g}\cdot\text{mol}^{-1}$

White solid

Melting point: 233–235 °C

Yield: 68%

**<sup>1</sup>H NMR (500 MHz, DMSO)**  $\delta$  8.08–8.02 (m, 3H), 7.86–7.82 (m, 2H), 7.77 (d,  $J$  = 13.5 Hz, 1H), 7.64–7.61 (m, 1H), 7.57–7.53 (m, 2H), 7.49–7.40 (m, 5H), 7.33–7.28 (m, 4H), 6.79 (d,  $J$  = 8.5 Hz, 2H), 6.12 (dd,  $J$  = 9.5 Hz,  $J$  = 6.5 Hz, 1H), 3.67 (s, 3H), 3.34–3.27 (m, 1H), 3.11–3.01 (m, 1H), 2.36 (s, 3H).

**<sup>13</sup>C NMR (126 MHz, DMSO)**  $\delta$  158.7 (d,  $J_{C-P}$  = 1.6 Hz), 151.5 (d,  $J_{C-P}$  = 5.8 Hz), 141.9, 140.8, 131.8 (d,  $J_{C-P}$  = 2.5 Hz), 131.7 (d,  $J_{C-P}$  = 95.8 Hz), 131.7 (d,  $J_{C-P}$  = 2.5 Hz), 131.7 (d,  $J_{C-P}$  = 94.4 Hz), 131.0 (d,  $J_{C-P}$  = 8.9 Hz), 130.9 (d,  $J_{C-P}$  = 8.8 Hz), 130.3 (d,  $J_{C-P}$  = 5.0 Hz), 129.2, 128.5 (d,  $J_{C-P}$  = 11.2 Hz), 128.4 (d,  $J_{C-P}$  = 11.3 Hz), 127.5, 126.0, 125.9 (q,  $J_{C-F}$  = 280.4 Hz), 113.4, 93.8, 60.7 (d,  $J_{C-P}$  = 75.6 Hz), 55.0, 28.4 (q,  $J_{C-F}$  = 30.9 Hz), 20.9.

**<sup>19</sup>F NMR (471 MHz, DMSO)**  $\delta$  -63.09 (s, 3F).

**<sup>31</sup>P NMR (202 MHz, DMSO)**  $\delta$  29.09 (s, 1P).

**IR (neat):**  $\nu$  = 3236, 1639, 1249, 1125, 1085, 692, 545  $\text{cm}^{-1}$ .

**ESI-HRMS (ESI-TOF):**  $m/z$  calcd for  $\text{C}_{31}\text{H}_{29}\text{F}_3\text{NNaO}_4\text{PS}^+$  [M+Na]<sup>+</sup>: 622.1399, found 622.1394.

**Compound 4d** (*E*)-diphenyl(((4,4,4-trifluoro-2-tosylbut-1-en-1-yl)amino)(4-(trifluoromethyl)phenyl)methyl)phosphine oxide

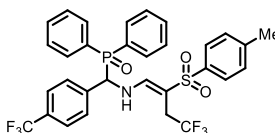

Chemical formula:  $\text{C}_{31}\text{H}_{26}\text{F}_6\text{NO}_3\text{PS}$

Molecular weight: 637.58  $\text{g}\cdot\text{mol}^{-1}$

White solid

Melting point: 237–239 °C

Yield: 91%

**<sup>1</sup>H NMR (500 MHz, DMSO)**  $\delta$  8.22–8.17 (m, 1H), 8.11–8.07 (m, 2H), 7.86–7.82 (m, 2H), 7.79 (d,  $J$  = 13.5 Hz, 1H), 7.68–7.56 (m, 7H), 7.52–7.43 (m, 3H), 7.32 (dd,  $J$  = 22.0 Hz,  $J$  = 8.5 Hz, 4H), 6.37 (dd,  $J$  = 9.5 Hz,  $J$  = 7.0 Hz, 1H), 3.38–3.31 (m, 1H), 3.11–3.02 (m, 1H), 2.36 (s, 3H).

**<sup>13</sup>C NMR (126 MHz, DMSO)**  $\delta$  151.3 (d,  $J_{C-P}$  = 5.7 Hz), 142.0, 140.5, 140.2, 132.1 (d,  $J_{C-P}$  = 2.5 Hz), 132.0 (d,  $J_{C-P}$  = 2.5 Hz), 131.1 (d,  $J_{C-P}$  = 9.1 Hz), 131.0 (d,  $J_{C-P}$  = 97.8 Hz), 131.0 (d,  $J_{C-P}$  = 94.5 Hz), 130.9 (d,  $J_{C-P}$  = 9.1 Hz), 129.6 (d,  $J_{C-P}$  = 4.5 Hz), 129.3, 128.7 (d,  $J_{C-P}$  = 11.5 Hz), 128.6 (d,  $J_{C-P}$  = 11.3 Hz), 128.3 (q,  $J_{C-F}$  = 32.3 Hz), 126.1, 125.9 (q,  $J_{C-F}$  = 280.1 Hz), 124.9 (q,  $J_{C-F}$  = 3.9 Hz), 124.1 (q,  $J_{C-F}$  = 272.7 Hz), 94.8, 61.3 (d,  $J_{C-P}$  = 72.6 Hz), 28.4 (q,  $J_{C-F}$  = 30.7 Hz), 20.9.

**<sup>19</sup>F NMR (471 MHz, DMSO)**  $\delta$  -61.05 (s, 3F), -63.13 (s, 3F).

**<sup>31</sup>P NMR (202 MHz, DMSO)**  $\delta$  29.25 (s, 1P).

**IR (neat):**  $\nu$  = 3256, 1643, 1328, 1115, 1070, 720, 653, 550  $\text{cm}^{-1}$ .

**ESI-HRMS (ESI-TOF):**  $m/z$  calcd for  $\text{C}_{31}\text{H}_{26}\text{F}_6\text{KNO}_3\text{PS}^+$  [M+K]<sup>+</sup>: 676.0907, found 676.0885.

**Compound 4e** (*E*)-diphenyl(((4,4,4-trifluoro-2-tosylbut-1-en-1-yl)amino)(4-(trifluoromethoxy)phenyl)methyl)phosphine oxide

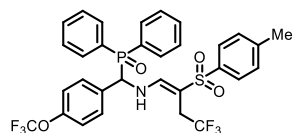

Chemical formula: C<sub>31</sub>H<sub>26</sub>F<sub>6</sub>NO<sub>4</sub>PS

Molecular weight: 653.58 g.mol<sup>-1</sup>

White solid

Melting point: 210–212 °C

Yield: 95%

**<sup>1</sup>H NMR (500 MHz, DMSO)** δ 8.14–8.06 (m, 3H), 7.83–7.75 (m, 3H), 7.67–7.64 (m, 1H), 7.59–7.56 (m, 4H), 7.51–7.47 (m, 1H), 7.45–7.41 (m, 2H), 7.33–7.24 (m, 6H), 6.28 (dd, *J* = 9.5 Hz, *J* = 6.5 Hz, 1H), 3.45–3.29 (m, 1H), 3.10–3.00 (m, 1H), 2.36 (s, 3H).

**<sup>13</sup>C NMR (126 MHz, DMSO)** δ 151.3 (d, *J*<sub>C-P</sub> = 5.7 Hz), 147.9, 142.1, 140.6, 135.0, 132.1 (d, *J*<sub>C-P</sub> = 2.5 Hz), 132.0 (d, *J*<sub>C-P</sub> = 2.5 Hz), 131.1 (d, *J*<sub>C-P</sub> = 8.9 Hz), 131.1 (d, *J*<sub>C-P</sub> = 94.8 Hz), 131.0 (d, *J*<sub>C-P</sub> = 97.3 Hz), 130.9 (d, *J*<sub>C-P</sub> = 2.6 Hz), 130.8 (d, *J*<sub>C-P</sub> = 2.6 Hz), 129.3, 128.7 (d, *J*<sub>C-P</sub> = 11.5 Hz), 128.6 (d, *J*<sub>C-P</sub> = 11.3 Hz), 126.1, 125.9 (q, *J*<sub>C-F</sub> = 280.2 Hz), 120.6, 120.0 (q, *J*<sub>C-F</sub> = 256.9 Hz), 94.6, 60.9 (d, *J*<sub>C-P</sub> = 73.6 Hz), 28.4 (q, *J*<sub>C-F</sub> = 30.9 Hz), 20.9.

**<sup>19</sup>F NMR (282 MHz, DMSO)** δ -56.81 (s, 3F), -63.12 (s, 3F).

**<sup>31</sup>P NMR (121 MHz, DMSO)** δ 29.15 (s, 1P).

**IR (neat):** ν = 3250, 1640, 1249, 1171, 1126, 692, 548 cm<sup>-1</sup>.

**ESI-HRMS (ESI-TOF):** m/z calcd for C<sub>31</sub>H<sub>26</sub>F<sub>6</sub>KNO<sub>4</sub>PS<sup>+</sup> [M+K]<sup>+</sup>: 692.0856, found 692.0840.

**Compound 4f** (*E*)-((4-fluorophenyl)((4,4,4-trifluoro-2-tosylbut-1-en-1-yl)amino)methyl)diphenylphosphine oxide

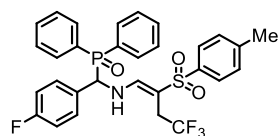

Chemical formula: C<sub>30</sub>H<sub>26</sub>F<sub>4</sub>NO<sub>3</sub>PS

Molecular weight: 587.57 g.mol<sup>-1</sup>

White solid

Melting point: 250–252 °C

Yield: 81%

**<sup>1</sup>H NMR (500 MHz, DMSO)** δ 8.08–8.04 (m, 3H), 7.82–7.74 (m, 3H), 7.66–7.63 (m, 1H), 7.58–7.41 (m, 7H), 7.30 (dd, *J* = 15.0 Hz, 8.5 Hz, 4H), 7.07 (t, *J* = 8.5 Hz, 2H), 6.21 (dd, *J* = 10.0 Hz, *J* = 7.0 Hz, 1H), 3.36–3.26 (m, 1H), 3.08–3.02 (m, 1H), 2.36 (s, 3H).

**<sup>13</sup>C NMR (126 MHz, DMSO)** δ 161.7 (d, *J*<sub>C-F</sub> = 245.2 Hz), 151.4 (d, *J*<sub>C-P</sub> = 5.8 Hz), 142.1, 140.6, 132.0, 131.8 (d, *J*<sub>C-F</sub> = 3.0 Hz), 131.2 (d, *J*<sub>C-P</sub> = 96.6 Hz), 131.2 (d, *J*<sub>C-P</sub> = 96.6 Hz), 131.1 (d, *J*<sub>C-P</sub> = 8.9 Hz), 131.0 (d, *J*<sub>C-F</sub> = 5.0 Hz), 130.9 (d, *J*<sub>C-P</sub> = 8.9 Hz), 129.3, 128.7 (d, *J*<sub>C-P</sub> = 11.3 Hz), 128.6 (d, *J*<sub>C-P</sub> = 11.3 Hz), 126.1, 125.9 (q, *J*<sub>C-F</sub> = 280.1 Hz), 115.0 (d, *J*<sub>C-F</sub> = 21.4 Hz), 94.4, 60.8 (d, *J*<sub>C-P</sub> = 74.3 Hz), 28.5 (q, *J*<sub>C-F</sub> = 30.6 Hz), 21.0.

**<sup>19</sup>F NMR (471 MHz, DMSO)** δ -63.11 (s, 3F), -114.13 (s, 1F).

**<sup>31</sup>P NMR (121 MHz, DMSO)** δ 29.18 (s, 1P).

**IR (neat):** ν = 3231, 1639, 1279, 1134, 1086, 659, 537 cm<sup>-1</sup>.

**ESI-HRMS (ESI-TOF):** m/z calcd for C<sub>30</sub>H<sub>26</sub>F<sub>4</sub>KNO<sub>3</sub>PS<sup>+</sup> [M+K]<sup>+</sup>: 626.0939, found 626.0932.

**Compound 4g** (*E*)-((4-chlorophenyl)((4,4,4-trifluoro-2-tosylbut-1-en-1-yl)amino)methyl)diphenylphosphine oxide

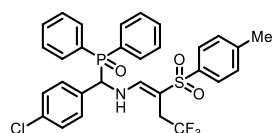

Chemical formula: C<sub>30</sub>H<sub>26</sub>ClF<sub>3</sub>NO<sub>3</sub>PS

Molecular weight: 604.02 g.mol<sup>-1</sup>

White solid

Melting point: 257–259 °C

Yield: 73%

**<sup>1</sup>H NMR (500 MHz, DMSO)** δ 8.13–8.05 (m, 3H), 7.85–7.81 (m, 2H), 7.76 (d, *J* = 13.0 Hz, 1H), 7.66–7.63 (m, 1H), 7.59–7.55 (m, 2H), 7.51–7.42 (m, 5H), 7.33–7.28 (m, 6H), 6.24 (dd, *J* = 9.5 Hz, *J* = 7.0 Hz, 1H), 3.38–3.29 (m, 1H), 3.11–3.01 (m, 1H), 2.36 (s, 3H).

**<sup>13</sup>C NMR (126 MHz, DMSO)** δ 151.3 (d, *J*<sub>C-P</sub> = 5.7 Hz), 142.0, 140.6, 134.6, 132.1 (d, *J*<sub>C-P</sub> = 137.7 Hz), 132.1 (d, *J*<sub>C-P</sub> = 137.5 Hz), 132.0 (d, *J*<sub>C-P</sub> = 2.6 Hz), 131.9 (d, *J*<sub>C-P</sub> = 2.4 Hz), 131.1 (d, *J*<sub>C-P</sub> = 8.9 Hz), 130.9 (d, *J*<sub>C-P</sub> = 9.1 Hz), 130.7, 130.7 (d, *J*<sub>C-P</sub> = 8.3 Hz), 129.3, 128.7 (d, *J*<sub>C-P</sub> = 11.5 Hz), 128.5 (d, *J*<sub>C-P</sub> = 11.3 Hz), 128.0, 126.1, 125.9 (q, *J*<sub>C-F</sub> = 280.4 Hz), 94.5, 60.9 (d, *J*<sub>C-P</sub> = 73.8 Hz), 28.4 (q, *J*<sub>C-F</sub> = 30.5 Hz), 20.9.

**<sup>19</sup>F NMR (471 MHz, DMSO)** δ -63.11 (s, 3F).

**<sup>31</sup>P NMR (202 MHz, DMSO)** δ 29.16 (s, 1P).

**IR (neat):** ν = 3230, 1639, 1250, 1129, 1087, 660, 542 cm<sup>-1</sup>.

**ESI-HRMS (ESI-TOF):** m/z calcd for C<sub>30</sub>H<sub>26</sub>ClF<sub>3</sub>KNO<sub>3</sub>PS<sup>+</sup> [M+K]<sup>+</sup>: 642.0644, found 642.0623.

**Compound 4h** (*E*)-((4-bromophenyl)((4,4,4-trifluoro-2-tosylbut-1-en-1-yl)amino)methyl)diphenylphosphine oxide

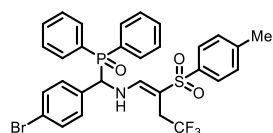

Chemical formula: C<sub>30</sub>H<sub>26</sub>BrF<sub>3</sub>NO<sub>3</sub>PS

Molecular weight: 648.48 g.mol<sup>-1</sup>

White solid

Melting point: 251–253 °C

Yield: 78%



**<sup>1</sup>H NMR (500 MHz, DMSO)** δ 8.10–8.03 (m, 3H), 7.84–7.80 (m, 2H), 7.74 (d, *J* = 13.0 Hz, 1H), 7.66–7.63 (m, 1H), 7.58–7.55 (m, 2H), 7.52–7.39 (m, 7H), 7.32–7.28 (m, 4H), 6.22 (dd, *J* = 9.5 Hz, *J* = 7.0 Hz, 1H), 3.44–3.27 (m, 1H), 3.09–3.00 (m, 1H), 2.36 (s, 3H).

**<sup>13</sup>C NMR (126 MHz, DMSO)** δ 151.3 (d, *J*<sub>C-P</sub> = 5.8 Hz), 142.1, 140.6, 135.0, 132.1 (d, *J*<sub>C-P</sub> = 2.4 Hz), 132.0 (d, *J*<sub>C-P</sub> = 2.4 Hz), 131.1 (d, *J*<sub>C-P</sub> = 97.6 Hz), 131.1 (d, *J*<sub>C-P</sub> = 94.2 Hz), 131.1 (d, *J*<sub>C-P</sub> = 4.0 Hz), 131.0 (d, *J*<sub>C-P</sub> = 5.4 Hz), 130.9 (d, *J*<sub>C-P</sub> = 8.9 Hz), 129.3, 128.7, 128.6, 128.5, 126.1, 125.9 (q, *J*<sub>C-F</sub> = 280.4 Hz), 121.3 (d, *J*<sub>C-P</sub> = 2.4 Hz), 94.6, 60.9 (d, *J*<sub>C-P</sub> = 73.7 Hz), 28.4 (q, *J*<sub>C-F</sub> = 30.7 Hz), 20.9.

**<sup>19</sup>F NMR (282 MHz, DMSO)** δ -63.11 (s, 3F).

**<sup>31</sup>P NMR (121 MHz, DMSO)** δ 28.92 (s, 1P).

**IR (neat):** ν = 3266, 1641, 1251, 1124, 1076, 685, 596, 541 cm<sup>-1</sup>.

**ESI-HRMS (ESI-TOF):** *m/z* calcd for C<sub>30</sub>H<sub>26</sub>BrF<sub>3</sub>KNO<sub>3</sub>PS<sup>+</sup> [M+K]<sup>+</sup>: 686.0138, found 686.0120.

**Compound 4i** (*E*)-diphenyl(*o*-tolyl)((4,4,4-trifluoro-2-tosylbut-1-en-1-yl)amino)methyl)phosphine oxide

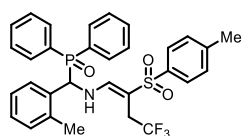

Chemical formula: C<sub>31</sub>H<sub>29</sub>F<sub>3</sub>NO<sub>3</sub>PS

Molecular weight: 583.61 g.mol<sup>-1</sup>

White solid

Melting point: 252–254 °C

Yield: 76%

**<sup>1</sup>H NMR (500 MHz, DMSO)** δ 8.14–8.10 (m, 2H), 8.01–7.99 (m, 1H), 7.93–7.88 (m, 1H), 7.84 (d, *J* = 13.5 Hz, 1H), 7.68–7.62 (m, 3H), 7.59–7.55 (m, 2H), 7.49–7.46 (m, 1H), 7.40–7.37 (m, 4H), 7.30 (d, *J* = 8.0 Hz, 2H), 7.17–7.12 (m, 2H), 7.04–7.03 (m, 1H), 5.84 (dd, *J* = 8.5 Hz, *J* = 7.0 Hz, 1H), 3.27–3.17 (m, 1H), 3.08–2.99 (m, 1H), 2.37 (s, 3H), 2.11 (s, 3H).

**<sup>13</sup>C NMR (126 MHz, DMSO)** δ 151.3 (d, *J*<sub>C-P</sub> = 4.7 Hz), 141.9, 140.7, 136.7 (d, *J*<sub>C-P</sub> = 7.3 Hz), 133.8, 132.0 (d, *J*<sub>C-P</sub> = 2.6 Hz), 131.7 (d, *J*<sub>C-P</sub> = 93.7 Hz), 131.7 (d, *J*<sub>C-P</sub> = 8.9 Hz), 130.8 (d, *J*<sub>C-P</sub> = 9.1 Hz), 130.8 (d, *J*<sub>C-P</sub> = 97.8 Hz), 130.2, 130.2, 129.2, 128.6, 128.5 (d, *J*<sub>C-P</sub> = 1.8 Hz), 128.4, 128.0, 126.2, 125.9 (q, *J*<sub>C-F</sub> = 280.1 Hz), 125.6, 94.2, 57.4 (d, *J*<sub>C-P</sub> = 75.2 Hz), 28.4 (q, *J*<sub>C-F</sub> = 30.9 Hz), 20.9, 19.2.

**<sup>19</sup>F NMR (471 MHz, DMSO)** δ -63.14 (s, 3F).

**<sup>31</sup>P NMR (202 MHz, DMSO)** δ 29.75 (s, 1P).

**IR (neat):** ν = 3245, 1634, 1252, 1132, 1085, 663, 546 cm<sup>-1</sup>.

**ESI-HRMS (ESI-TOF):** *m/z* calcd for C<sub>31</sub>H<sub>29</sub>F<sub>3</sub>KNO<sub>3</sub>PS<sup>+</sup> [M+K]<sup>+</sup>: 622.1189, found 622.1165.

**Compound 4j** (*E*)-((2-fluorophenyl)((4,4,4-trifluoro-2-tosylbut-1-en-1-yl)amino)methyl)diphenylphosphine oxide

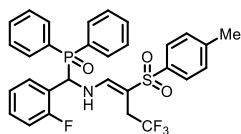

Chemical formula: C<sub>30</sub>H<sub>26</sub>F<sub>4</sub>NO<sub>3</sub>PS

Molecular weight: 587.57 g.mol<sup>-1</sup>

White solid

Melting point: 219–221 °C

Yield: 87%

**<sup>1</sup>H NMR (500 MHz, DMSO)** δ 8.15 (dd, *J* = 11.0 Hz, *J* = 7.5 Hz, 2H), 8.06–7.97 (m, 2H), 7.90 (d, *J* = 13.5 Hz, 1H), 7.79–7.75 (m, 2H), 7.62 (t, *J* = 7.5 Hz, 1H), 7.55–7.47 (m, 3H), 7.43–7.39 (m, 4H), 7.32–7.26 (m, 3H), 7.18 (t, *J* = 7.5 Hz, 1H), 7.00 (t, *J* = 9.5 Hz, 1H), 6.29 (dd, *J* = 9.5 Hz, *J* = 7.0 Hz, 1H), 3.36–3.26 (m, 1H), 3.11–3.02 (m, 1H), 2.37 (s, 3H).

**<sup>13</sup>C NMR (126 MHz, DMSO)** δ 159.0 (d, *J*<sub>C-F</sub> = 247.2 Hz), 151.5 (d, *J*<sub>C-P</sub> = 5.5 Hz), 142.0, 140.7, 132.1 (d, *J*<sub>C-P</sub> = 2.5 Hz), 132.0 (d, *J*<sub>C-P</sub> = 2.5 Hz), 131.5 (d, *J*<sub>C-F</sub> = 3.3 Hz), 131.4 (d, *J*<sub>C-P</sub> = 8.7 Hz), 131.0 (d, *J*<sub>C-P</sub> = 98.4 Hz), 130.8 (d, *J*<sub>C-P</sub> = 9.1 Hz), 130.7 (d, *J*<sub>C-P</sub> = 98.4 Hz), 130.2 (d, *J*<sub>C-P</sub> = 8.2 Hz), 129.2, 128.6 (d, *J*<sub>C-P</sub> = 11.6 Hz), 128.4 (d, *J*<sub>C-P</sub> = 11.5 Hz), 126.2, 125.9 (q, *J*<sub>C-F</sub> = 280.2 Hz), 124.2, 122.5 (d, *J*<sub>C-F</sub> = 14.9 Hz), 115.0 (d, *J*<sub>C-F</sub> = 22.1 Hz), 95.0, 54.6 (d, *J*<sub>C-P</sub> = 75.5 Hz), 28.4 (q, *J*<sub>C-F</sub> = 30.9 Hz), 20.9.

**<sup>19</sup>F NMR (471 MHz, DMSO)** δ -63.20 (s, 3F), -115.07 (s, 1F).

**<sup>31</sup>P NMR (202 MHz, DMSO)** δ 29.33 (s, 1P).

**IR (neat):** ν = 3226, 1637, 1260, 1135, 1083, 694, 658, 549 cm<sup>-1</sup>.

**ESI-HRMS (ESI-TOF):** *m/z* calcd for C<sub>30</sub>H<sub>26</sub>F<sub>4</sub>KNO<sub>3</sub>PS<sup>+</sup> [M+K]<sup>+</sup>: 626.0939, found 626.0923.

**Compound 4k** (*E*)-((2-chlorophenyl)((4,4,4-trifluoro-2-tosylbut-1-en-1-yl)amino)methyl)diphenylphosphine oxide

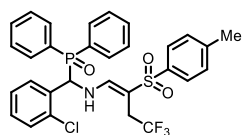

Chemical formula: C<sub>30</sub>H<sub>26</sub>ClF<sub>3</sub>NO<sub>3</sub>PS

Molecular weight: 604.02 g.mol<sup>-1</sup>

White solid

Melting point: 224–226 °C

Yield: 82%

**<sup>1</sup>H NMR (500 MHz, DMSO)** δ 8.17 (d, *J* = 8.0 Hz, 1H), 8.13–8.09 (m, 2H), 8.06–8.02 (m, 1H), 7.79 (d, *J* = 13.5 Hz, 1H), 7.69–7.65 (m, 3H), 7.60–7.56 (m, 2H), 7.50–7.47 (m, 1H), 7.41–7.25 (m, 9H), 6.03 (dd, *J* = 9.0 Hz, *J* = 7.0 Hz, 1H), 3.34–3.24 (m, 1H), 3.08–2.98 (m, 1H), 2.36 (s, 3H).

**<sup>13</sup>C NMR (126 MHz, DMSO)** δ 151.1 (d, *J*<sub>C-P</sub> = 5.0 Hz), 142.1, 140.5, 133.1 (d, *J*<sub>C-P</sub> = 2.8 Hz), 132.9 (d, *J*<sub>C-P</sub> = 7.4 Hz), 132.2 (d, *J*<sub>C-P</sub> = 2.6 Hz), 131.8 (d, *J*<sub>C-P</sub> = 3.8 Hz), 131.6 (d, *J*<sub>C-P</sub> = 9.1 Hz), 130.9 (d, *J*<sub>C-P</sub> = 9.2 Hz), 130.9 (d, *J*<sub>C-P</sub> = 95.0 Hz), 130.3 (d, *J*<sub>C-P</sub> = 99.0 Hz), 130.0, 129.3, 129.3, 128.7 (d, *J*<sub>C-P</sub> = 11.6 Hz), 128.5 (d, *J*<sub>C-P</sub> = 11.5 Hz), 127.1, 126.3, 125.9 (q, *J*<sub>C-F</sub> = 280.4 Hz), 95.2, 57.9 (d, *J*<sub>C-P</sub> = 75.0 Hz), 28.5 (q, *J*<sub>C-F</sub> = 30.8 Hz), 21.0.

**<sup>19</sup>F NMR (471 MHz, DMSO)** δ -63.09 (s, 3F).

**<sup>31</sup>P NMR (202 MHz, DMSO)** δ 29.73 (s, 1P).

**IR (neat):** ν = 3236, 1637, 1251, 1122, 1090, 662, 565 cm<sup>-1</sup>.

**ESI-HRMS (ESI-TOF):** m/z calcd for C<sub>30</sub>H<sub>26</sub>ClF<sub>3</sub>KNO<sub>3</sub>PS<sup>+</sup> [M+K]<sup>+</sup>: 642.0643, found 642.0631.

**Compound 4l** (*E*)-((2-bromophenyl)((4,4,4-trifluoro-2-tosylbut-1-en-1-yl)amino)methyl)diphenylphosphine oxide

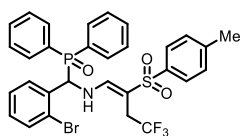

Chemical formula: C<sub>30</sub>H<sub>26</sub>BrF<sub>3</sub>NO<sub>3</sub>PS

Molecular weight: 648.48 g.mol<sup>-1</sup>

White solid

Melting point: 225–227 °C

Yield: 82%

**<sup>1</sup>H NMR (500 MHz, DMSO)** δ 8.18 (d, *J* = 7.5 Hz, 1H), 8.08–8.03 (m, 3H), 7.73–7.58 (m, 6H), 7.49 (t, *J* = 8.5 Hz, 2H), 7.41–7.37 (m, 5H), 7.30 (d, *J* = 8.0 Hz, 2H), 7.20 (t, *J* = 8.0 Hz, 1H), 5.88–5.85 (m, 1H), 3.33–3.24 (m, 1H), 3.07–2.97 (m, 1H), 2.36 (s, 3H).

**<sup>13</sup>C NMR (126 MHz, DMSO)** δ 150.8 (d, *J*<sub>C-P</sub> = 4.8 Hz), 142.1, 140.4, 134.7 (d, *J*<sub>C-P</sub> = 3.0 Hz), 132.7, 132.3 (d, *J*<sub>C-P</sub> = 2.6 Hz), 132.3 (d, *J*<sub>C-P</sub> = 2.5 Hz), 131.8 (d, *J*<sub>C-P</sub> = 3.6 Hz), 131.5 (d, *J*<sub>C-P</sub> = 8.9 Hz), 130.9 (d, *J*<sub>C-P</sub> = 9.1 Hz), 130.7 (d, *J*<sub>C-P</sub> = 95.4 Hz), 130.4, 130.1 (d, *J*<sub>C-P</sub> = 99.0 Hz), 129.3, 128.8 (d, *J*<sub>C-P</sub> = 11.6 Hz), 128.6 (d, *J*<sub>C-P</sub> = 15.2 Hz), 127.8, 126.3, 125.9 (q, *J*<sub>C-F</sub> = 280.2 Hz), 124.1 (d, *J*<sub>C-P</sub> = 8.2 Hz), 95.4, 60.5 (d, *J*<sub>C-P</sub> = 75.0 Hz), 28.4 (q, *J*<sub>C-F</sub> = 30.9 Hz), 20.9.

**<sup>19</sup>F NMR (471 MHz, DMSO)** δ -63.04 (s, 3F).

**<sup>31</sup>P NMR (202 MHz, DMSO)** δ 29.76 (s, 1P).

**IR (neat):** ν = 3242, 1639, 1252, 1134, 1090, 690, 545 cm<sup>-1</sup>.

**ESI-HRMS (ESI-TOF):** m/z calcd for C<sub>30</sub>H<sub>26</sub>BrF<sub>3</sub>KNO<sub>3</sub>PS<sup>+</sup> [M+K]<sup>+</sup>: 686.0138, found 686.0122.

**Compound 4m** (*E*)-(benzo[*d*][1,3]dioxol-5-yl)((4,4,4-trifluoro-2-tosylbut-1-en-1-yl)amino)methyl)diphenylphosphine oxide

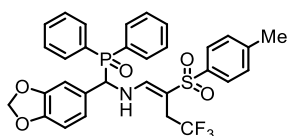

Chemical formula: C<sub>31</sub>H<sub>27</sub>F<sub>3</sub>NO<sub>5</sub>PS

Molecular weight: 613.59 g.mol<sup>-1</sup>

White solid

Melting point: 242–244 °C

Yield: 53%

**<sup>1</sup>H NMR (500 MHz, DMSO)** δ 8.05–8.01 (m, 2H), 7.99–7.94 (m, 1H), 7.85–7.81 (m, 2H), 7.72 (d, *J* = 13.0 Hz, 1H), 7.65–7.61 (m, 1H), 7.57–7.53 (m, 2H), 7.50–7.42 (m, 3H), 7.32–7.28 (m, 4H), 7.19–7.18 (m, 1H), 6.88–6.86 (m, 1H), 6.74 (d, *J* = 8.0 Hz, 1H), 6.08 (dd, *J* = 9.5 Hz, *J* = 6.5 Hz, 1H), 5.95 (dd, *J* = 3.5 Hz, *J* = 1.0 Hz, 2H), 3.35–3.25 (m, 1H), 3.08–2.99 (m, 1H), 2.36 (s, 3H).

**<sup>13</sup>C NMR (126 MHz, DMSO)** δ 151.4 (d, *J*<sub>C-P</sub> = 5.9 Hz), 147.0 (d, *J*<sub>C-P</sub> = 1.1 Hz), 146.8 (d, *J*<sub>C-P</sub> = 1.8 Hz), 142.0, 140.7, 131.9 (d, *J*<sub>C-P</sub> = 1.0 Hz), 131.9 (d, *J*<sub>C-P</sub> = 1.0 Hz), 131.5 (d, *J*<sub>C-P</sub> = 95.0 Hz), 131.4 (d, *J*<sub>C-P</sub> = 94.8 Hz), 131.1 (d, *J*<sub>C-P</sub> = 8.9 Hz), 130.9 (d, *J*<sub>C-P</sub> = 8.8 Hz), 129.3, 129.2, 128.7 (d, *J*<sub>C-P</sub> = 11.5 Hz), 128.5 (d, *J*<sub>C-P</sub> = 11.3 Hz), 126.1, 126.0 (q, *J*<sub>C-F</sub> = 280.4 Hz), 122.7 (d, *J*<sub>C-P</sub> = 6.0 Hz), 109.4 (d, *J*<sub>C-P</sub> = 4.3 Hz), 107.8, 101.1, 94.1, 61.1 (d, *J*<sub>C-P</sub> = 75.5 Hz), 28.5 (q, *J*<sub>C-F</sub> = 31.0 Hz), 21.0.

**<sup>19</sup>F NMR (282 MHz, DMSO)** δ -63.09 (s, 3F).

**<sup>31</sup>P NMR (121 MHz, DMSO)** δ 29.18 (s, 1P).

**IR (neat):** ν = 3226, 1635, 1274, 1250, 1181, 1123, 1083, 694, 583, 545, 520 cm<sup>-1</sup>.

**ESI-HRMS (ESI-TOF):** m/z calcd for C<sub>31</sub>H<sub>27</sub>F<sub>3</sub>KNO<sub>5</sub>PS<sup>+</sup> [M+K]<sup>+</sup>: 652.0931, found 652.0923.

**Compound 4n** (*E*)-((3,5-difluorophenyl)((4,4,4-trifluoro-2-tosylbut-1-en-1-yl)amino)methyl)diphenylphosphine oxide

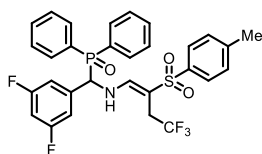

Chemical formula: C<sub>30</sub>H<sub>25</sub>F<sub>5</sub>NO<sub>3</sub>PS

Molecular weight: 605.56 g.mol<sup>-1</sup>

White solid

Melting point: 227–229 °C

Yield: 75%

**<sup>1</sup>H NMR (500 MHz, DMSO)** δ 8.11–8.03 (m, 3H), 7.83–7.79 (m, 2H), 7.71–7.66 (m, 2H), 7.61–7.57 (m, 2H), 7.55–7.51 (m, 1H), 7.49–7.46 (m, 2H), 7.32–7.28 (m, 4H), 7.14–7.07 (m, 3H), 6.27 (dd, *J* = 9.5 Hz, *J* = 7.0 Hz, 1H), 3.39–3.31 (m, 1H), 3.09–3.00 (m, 1H), 2.36 (s, 3H).

**<sup>13</sup>C NMR (126 MHz, DMSO)** δ 161.8 (d, *J*<sub>C-F</sub> = 246.8 Hz), 151.1 (d, *J*<sub>C-P</sub> = 5.5 Hz), 142.2, 140.4, 139.7 (t, *J*<sub>C-F</sub> = 9.3 Hz), 132.3 (d, *J*<sub>C-P</sub> = 2.6 Hz), 132.2 (d, *J*<sub>C-P</sub> = 2.6 Hz), 131.1 (d, *J*<sub>C-P</sub> = 9.1 Hz), 130.9 (d, *J*<sub>C-P</sub> = 9.3 Hz), 130.6 (d, *J*<sub>C-P</sub> = 95.0 Hz), 130.5 (d, *J*<sub>C-P</sub> = 95.0 Hz), 129.4, 128.8 (d, *J*<sub>C-P</sub> = 11.6 Hz), 128.7 (d, *J*<sub>C-P</sub> = 11.5 Hz), 126.1, 125.9 (q, *J*<sub>C-F</sub> = 280.2 Hz), 112.1 (d, *J*<sub>C-F</sub> = 26.1 Hz), 103.4 (t, *J*<sub>C-F</sub> = 25.8 Hz), 95.2, 61.2 (d, *J*<sub>C-P</sub> = 72.6 Hz), 28.5 (q, *J*<sub>C-F</sub> = 30.9 Hz), 21.0.

**<sup>19</sup>F NMR (471 MHz, DMSO)** δ -63.10 (s, 3F), -109.81 (s, 2F).

**<sup>31</sup>P NMR (202 MHz, DMSO)** δ 29.30 (s, 1P).

**IR (neat):** ν = 3245, 1642, 1275, 1119, 1089, 695, 660, 582, 552 cm<sup>-1</sup>.

**ESI-HRMS (ESI-TOF):** m/z calcd for C<sub>30</sub>H<sub>25</sub>F<sub>5</sub>KNO<sub>3</sub>PS<sup>+</sup> [M+K]<sup>+</sup>: 644.0845, found 644.0838.

**Compound 4o** (*E*)-((3,4-dichlorophenyl)((4,4,4-trifluoro-2-tosylbut-1-en-1-yl)amino)methyl)diphenylphosphine oxide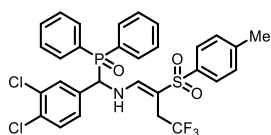Chemical formula: C<sub>30</sub>H<sub>25</sub>Cl<sub>2</sub>F<sub>3</sub>NO<sub>3</sub>PSMolecular weight: 638.46 g.mol<sup>-1</sup>

White solid

Melting point: 245–247 °C

Yield: 76%

**<sup>1</sup>H NMR (500 MHz, DMSO)** δ 8.13–8.02 (m, 3H), 7.83–7.77 (m, 3H), 7.72–7.65 (m, 2H), 7.60–7.45 (m, 6H), 7.32–7.28 (m, 5H), 6.27 (dd, *J* = 9.5 Hz, *J* = 7.0 Hz, 1H), 3.44–3.30 (m, 1H), 3.07–2.98 (m, 1H), 2.36 (s, 3H).

**<sup>13</sup>C NMR (126 MHz, DMSO)** δ 151.1 (d, *J*<sub>C-P</sub> = 5.7 Hz), 142.1, 140.5, 136.5, 132.3 (d, *J*<sub>C-P</sub> = 2.5 Hz), 132.2 (d, *J*<sub>C-P</sub> = 2.5 Hz), 131.1 (d, *J*<sub>C-P</sub> = 9.1 Hz), 130.9 (d, *J*<sub>C-P</sub> = 9.1 Hz), 130.8 (d, *J*<sub>C-P</sub> = 1.9 Hz), 130.8, 130.7 (d, *J*<sub>C-P</sub> = 95.0 Hz), 130.7 (d, *J*<sub>C-P</sub> = 97.8 Hz), 130.6 (d, *J*<sub>C-P</sub> = 2.3 Hz), 130.2, 129.3, 129.0 (d, *J*<sub>C-P</sub> = 4.6 Hz), 128.7 (d, *J*<sub>C-P</sub> = 22.4 Hz), 128.7, 126.1, 125.9 (q, *J*<sub>C-F</sub> = 280.2 Hz), 95.0, 60.7 (d, *J*<sub>C-P</sub> = 73.08 Hz), 28.5 (q, *J*<sub>C-F</sub> = 29.4 Hz), 21.0.

**<sup>19</sup>F NMR (471 MHz, DMSO)** δ -63.11 (s, 3F).

**<sup>31</sup>P NMR (202 MHz, DMSO)** δ 29.32 (s, 1P).

**IR (neat):** ν = 3222, 1637, 1279, 1131, 1088, 693, 661, 561 cm<sup>-1</sup>.

**ESI-HRMS (ESI-TOF):** m/z calcd for C<sub>30</sub>H<sub>25</sub>Cl<sub>2</sub>F<sub>3</sub>KNO<sub>3</sub>PS<sup>+</sup> [M+K]<sup>+</sup>: 676.0253, found 676.0246.

**Compound 4p** (*E*)-*N*-((3,4-dichlorophenyl)(methoxy)methyl)-4,4,4-trifluoro-2-tosylbut-1-en-1-amine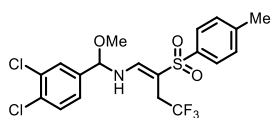Chemical formula: C<sub>19</sub>H<sub>18</sub>Cl<sub>2</sub>F<sub>3</sub>NO<sub>3</sub>SMolecular weight: 468.31 g.mol<sup>-1</sup>

White solid

*R*<sub>f</sub> = 0.18 (petroleum ether : ethyl acetate = 5:1)

Yield: 95%

**<sup>1</sup>H NMR (500 MHz, DMSO)** δ 8.00–7.96 (m, 1H), 7.80 (d, *J* = 13.5 Hz, 1H), 7.69 (d, *J* = 8.0 Hz, 1H), 7.64–7.62 (m, 3H), 7.39 (dd, *J* = 8.5 Hz, *J* = 2.0 Hz, 1H), 7.35 (d, *J* = 8.0 Hz, 2H), 5.68 (d, *J* = 8.0 Hz, 1H), 3.35 (s, 3H), 3.25 (q, *J* = 10.5 Hz, 2H), 2.36 (s, 3H).

**<sup>13</sup>C NMR (126 MHz, DMSO)** δ 149.4, 142.4, 140.4, 140.3, 131.0, 130.9, 130.6, 129.5, 128.3, 126.8, 126.4, 126.2 (q, *J*<sub>C-F</sub> = 280.1 Hz), 96.3 (q, *J*<sub>C-F</sub> = 2.8 Hz), 88.5, 54.5, 28.9 (q, *J*<sub>C-F</sub> = 30.9 Hz), 20.9.

**<sup>19</sup>F NMR (471 MHz, DMSO)** δ -63.10 (s, 3F).

**ESI-HRMS (ESI-TOF):** m/z calcd for C<sub>19</sub>H<sub>18</sub>Cl<sub>2</sub>F<sub>3</sub>NNaO<sub>3</sub>S<sup>+</sup> [M+Na]<sup>+</sup>: 490.0229, found 490.0224.

**Compound 4q** (*E*)-(naphthalen-1-yl)((4,4,4-trifluoro-2-tosylbut-1-en-1-yl)amino)methyl)diphenylphosphine oxide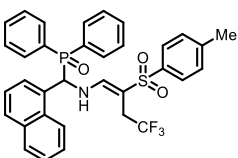Chemical formula: C<sub>34</sub>H<sub>29</sub>F<sub>3</sub>NO<sub>3</sub>PSMolecular weight: 619.64 g.mol<sup>-1</sup>

White solid

Melting point: 248–250 °C

Yield: 39%

**<sup>1</sup>H NMR (500 MHz, DMSO)** δ 8.44–8.42 (m, 1H), 8.33 (d, *J* = 7.5 Hz, 1H), 8.21–8.17 (m, 2H), 8.06–8.01 (m, 1H), 7.93 (d, *J* = 13.5 Hz, 1H), 7.87–7.83 (m, 2H), 7.71–7.65 (m, 3H), 7.60–7.56 (m, 2H), 7.49–7.45 (m, 3H), 7.35–7.22 (m, 7H), 6.60 (dd, *J* = 9.0 Hz, *J* = 6.5 Hz, 1H), 3.24–3.14 (m, 1H), 3.03–2.93 (m, 1H), 2.36 (s, 3H).

**<sup>13</sup>C NMR (126 MHz, DMSO)** δ 151.1 (d, *J*<sub>C-P</sub> = 4.4 Hz), 142.0, 140.7, 133.3, 132.1, 131.9, 131.7 (d, *J*<sub>C-P</sub> = 9.1 Hz), 131.6, 131.5 (d, *J*<sub>C-P</sub> = 93.7 Hz), 131.2 (d, *J*<sub>C-P</sub> = 98.4 Hz), 130.9 (d, *J*<sub>C-P</sub> = 7.1 Hz), 130.7 (d, *J*<sub>C-P</sub> = 8.9 Hz), 129.3, 128.9, 128.7 (d, *J*<sub>C-P</sub> = 4.8 Hz), 128.6, 128.6 (d, *J*<sub>C-P</sub> = 11.5 Hz), 128.4 (d, *J*<sub>C-P</sub> = 11.3 Hz), 126.2, 126.2, 125.9 (q, *J*<sub>C-F</sub> = 280.6 Hz), 125.8, 125.1, 123.9, 94.3, 56.2 (d, *J*<sub>C-P</sub> = 74.8 Hz), 28.5 (q, *J*<sub>C-F</sub> = 30.7 Hz), 21.0.

**<sup>19</sup>F NMR (471 MHz, DMSO)** δ -63.13 (s, 3F).

**<sup>31</sup>P NMR (202 MHz, DMSO)** δ 30.14 (s, 1P).

**IR (neat):** ν = 3219, 1637, 1261, 1129, 1088, 695, 665, 546 cm<sup>-1</sup>.

**ESI-HRMS (ESI-TOF):** m/z calcd for C<sub>34</sub>H<sub>29</sub>F<sub>3</sub>KNO<sub>3</sub>PS<sup>+</sup> [M+K]<sup>+</sup>: 658.1189, found 658.1174.

**Compound 4r** (*E*)-(((4,4-difluoro-2-tosylbut-1-en-1-yl)amino)(phenyl)methyl)diphenylphosphine oxide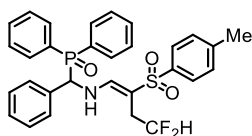Chemical formula: C<sub>30</sub>H<sub>28</sub>F<sub>2</sub>NO<sub>3</sub>PSMolecular weight: 551.59 g.mol<sup>-1</sup>

White solid

Melting point: 193–195 °C

Yield: 84%

**<sup>1</sup>H NMR (500 MHz, DMSO)** δ 8.07–8.02 (m, 2H), 7.88–7.79 (m, 3H), 7.64–7.60 (m, 2H), 7.57–7.53 (m, 2H), 7.49–7.40 (m, 5H), 7.33–7.29 (m, 4H), 7.23–7.17 (m, 3H), 6.10 (dd, *J* = 9.5 Hz, *J* = 6.5 Hz, 1H), 5.59–5.34 (m, 1H), 2.72–2.56 (m, 2H), 2.36 (s, 3H).

**<sup>13</sup>C NMR (126 MHz, DMSO)** δ 149.5 (d,  $J_{C-P}$  = 5.3 Hz), 142.4, 139.9, 135.6, 132.0, 131.6 (d,  $J_{C-P}$  = 94.2 Hz), 131.3 (d,  $J_{C-P}$  = 94.2 Hz), 131.1 (d,  $J_{C-P}$  = 8.6 Hz), 131.0 (d,  $J_{C-P}$  = 8.9 Hz), 129.5, 129.0 (d,  $J_{C-P}$  = 4.9 Hz), 128.7 (d,  $J_{C-P}$  = 11.3 Hz), 128.5 (d,  $J_{C-P}$  = 11.3 Hz), 128.1, 127.8, 126.4, 115.7 (t,  $J_{C-F}$  = 241.7 Hz), 96.4, 61.3 (d,  $J_{C-P}$  = 73.7 Hz), 29.0 (t,  $J_{C-F}$  = 24.2 Hz), 21.0.

**<sup>19</sup>F NMR (471 MHz, DMSO)** δ -113.80 (d,  $J$  = 274.1 Hz, 1F), -114.19 (d,  $J$  = 274.1 Hz, 1F).

**<sup>31</sup>P NMR (202 MHz, DMSO)** δ 29.62 (s, 1P).

**IR (neat):**  $\nu$  = 3197, 1639, 1268, 1105, 722, 694, 543  $\text{cm}^{-1}$ .

**ESI-HRMS (ESI-TOF):**  $m/z$  calcd for  $\text{C}_{30}\text{H}_{28}\text{F}_2\text{KNO}_3\text{PS}^+$  [M+K]<sup>+</sup>: 590.1127, found 590.1104.

**Compound 4t** (*E*)-diphenyl(phenyl)((4,4,4-trifluoro-2-((2-(trifluoromethyl)phenyl)sulfonyl)but-1-en-1-yl)amino)methyl)phosphine oxide

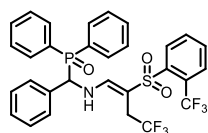

Chemical formula:  $\text{C}_{30}\text{H}_{24}\text{F}_6\text{NO}_3\text{PS}$

Molecular weight: 623.55  $\text{g}\cdot\text{mol}^{-1}$

White solid

Melting point: 236–238 °C

Yield: 55%

**<sup>1</sup>H NMR (500 MHz, DMSO)** δ 8.32–8.27 (m, 1H), 8.07–8.03 (m, 2H), 7.88–7.86 (m, 1H), 7.83–7.71 (m, 6H), 7.62–7.59 (m, 1H), 7.55–7.51 (m, 2H), 7.49–7.45 (m, 3H), 7.43–7.39 (m, 2H), 7.23–7.18 (m, 3H), 6.21 (dd,  $J$  = 9.5 Hz,  $J$  = 7.5 Hz, 1H), 3.53–3.42 (m, 1H), 3.13–3.03 (m, 1H).

**<sup>13</sup>C NMR (126 MHz, DMSO)** δ 152.8 (d,  $J_{C-P}$  = 6.9 Hz), 141.9, 135.6, 132.9, 132.6, 131.9 (d,  $J_{C-P}$  = 2.5 Hz), 131.9 (d,  $J_{C-P}$  = 2.5 Hz), 131.4 (d,  $J_{C-P}$  = 95.6 Hz), 131.3 (d,  $J_{C-P}$  = 95.6 Hz), 131.1 (d,  $J_{C-P}$  = 6.5 Hz), 131.0 (d,  $J_{C-P}$  = 6.5 Hz), 130.9, 129.0 (d,  $J_{C-P}$  = 4.8 Hz), 128.6 (d,  $J_{C-P}$  = 11.5 Hz), 128.5 (d,  $J_{C-P}$  = 11.5 Hz), 128.0 (q,  $J_{C-F}$  = 6.7 Hz), 128.0, 127.8, 126.0 (q,  $J_{C-F}$  = 280.4 Hz), 125.8 (q,  $J_{C-F}$  = 32.8 Hz), 122.9 (q,  $J_{C-F}$  = 274.7 Hz), 93.5, 61.6 (d,  $J_{C-P}$  = 74.2 Hz), 28.5 (q,  $J_{C-F}$  = 30.6 Hz).

**<sup>19</sup>F NMR (282 MHz, DMSO)** δ -55.74 (s, 3F), -63.30 (s, 3F).

**<sup>31</sup>P NMR (121 MHz, DMSO)** δ 29.14 (s, 1P).

**IR (neat):**  $\nu$  = 3065, 1634, 1308, 1127, 1035, 695, 603, 542  $\text{cm}^{-1}$ .

**ESI-HRMS (ESI-TOF):**  $m/z$  calcd for  $\text{C}_{30}\text{H}_{24}\text{F}_6\text{KNO}_3\text{PS}^+$  [M+K]<sup>+</sup>: 662.0750, found 662.0747.

**Compound 4u** (*E*)-(((2-((2,6-difluorophenyl)sulfonyl)-4,4,4-trifluorobut-1-en-1-yl)amino)(phenyl)methyl)diphenylphosphine oxide

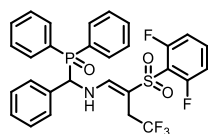

Chemical formula:  $\text{C}_{29}\text{H}_{23}\text{F}_5\text{NO}_3\text{PS}$

Molecular weight: 591.53  $\text{g}\cdot\text{mol}^{-1}$

White solid

Melting point: 257–259 °C

Yield: 85%

**<sup>1</sup>H NMR (500 MHz, DMSO)** δ 8.40–8.35 (m, 1H), 8.03–7.99 (m, 2H), 7.84–7.80 (m, 3H), 7.63–7.58 (m, 1H), 7.55–7.45 (m, 6H), 7.43–7.39 (m, 2H), 7.23–7.14 (m, 5H), 6.25 (dd,  $J$  = 9.5 Hz,  $J$  = 7.0 Hz, 1H), 3.59–3.50 (m, 1H), 3.26–3.16 (m, 1H).

**<sup>13</sup>C NMR (126 MHz, DMSO)** δ 158.7 (d,  $J_{C-F}$  = 256.8 Hz), 153.1 (d,  $J_{C-P}$  = 6.4 Hz), 135.5, 134.7 (t,  $J_{C-F}$  = 11.2 Hz), 131.8 (d,  $J_{C-P}$  = 2.5 Hz), 131.7 (d,  $J_{C-P}$  = 2.5 Hz), 131.3 (d,  $J_{C-P}$  = 96.9 Hz), 131.2 (d,  $J_{C-P}$  = 96.9 Hz), 131.0, 130.9, 128.9 (d,  $J_{C-P}$  = 4.8 Hz), 128.5 (d,  $J_{C-P}$  = 11.5 Hz), 128.4 (d,  $J_{C-P}$  = 11.5 Hz), 127.9, 127.7, 126.1 (q,  $J_{C-F}$  = 280.1 Hz), 120.6 (t,  $J_{C-F}$  = 15.5 Hz), 113.1 (d,  $J_{C-F}$  = 23.7 Hz), 95.4, 61.7 (d,  $J_{C-P}$  = 74.0 Hz), 28.3 (q,  $J_{C-F}$  = 30.9 Hz).

**<sup>19</sup>F NMR (282 MHz, DMSO)** δ -63.90 (s, 3F), -108.33 (s, 2F).

**<sup>31</sup>P NMR (121 MHz, DMSO)** δ 29.02 (s, 1P).

**IR (neat):**  $\nu$  = 3216, 1639, 1464, 1184, 1125, 1098, 725 692, 546  $\text{cm}^{-1}$ .

**ESI-HRMS (ESI-TOF):**  $m/z$  calcd for  $\text{C}_{29}\text{H}_{23}\text{F}_5\text{KNO}_3\text{PS}^+$  [M+K]<sup>+</sup>: 630.0688, found 630.0665.

**Compound 4v** (*E*)-diphenyl(phenyl)((4,4,4-trifluoro-2-(naphthalen-2-yl)sulfonyl)but-1-en-1-yl)amino)methyl)phosphine oxide

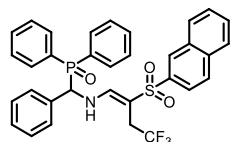

Chemical formula:  $\text{C}_{33}\text{H}_{27}\text{F}_3\text{NO}_3\text{PS}$

Molecular weight: 605.61  $\text{g}\cdot\text{mol}^{-1}$

White solid

Melting point: 233–235 °C

Yield: 69%

**<sup>1</sup>H NMR (500 MHz, DMSO)** δ 8.34 (s, 1H), 8.27–8.22 (m, 1H), 8.15–8.02 (m, 5H), 7.97 (d,  $J$  = 13.0 Hz, 1H), 7.88–7.84 (m, 2H), 7.68–7.36 (m, 11H), 7.25–7.17 (m, 3H), 6.26 (dd,  $J$  = 9.5 Hz,  $J$  = 7.0 Hz, 1H), 3.47–3.37 (m, 1H), 3.24–3.14 (m, 1H).

**<sup>13</sup>C NMR (126 MHz, DMSO)** δ 152.0 (d,  $J_{C-P}$  = 5.9 Hz), 140.4, 135.5, 133.9, 132.0 (d,  $J_{C-P}$  = 2.5 Hz), 131.9 (d,  $J_{C-P}$  = 2.5 Hz), 131.7, 131.4 (d,  $J_{C-P}$  = 96.6 Hz), 131.4 (d,  $J_{C-P}$  = 96.6 Hz), 131.2 (d,  $J_{C-P}$  = 8.9 Hz), 131.0 (d,  $J_{C-P}$  = 8.9 Hz), 129.2, 129.0 (d,  $J_{C-P}$  = 4.8 Hz), 128.7, 128.6, 128.6, 128.5, 128.5, 128.1, 127.8, 127.5, 126.7, 126.1 (q,  $J_{C-F}$  = 280.4 Hz), 122.3, 94.1, 61.6 (d,  $J_{C-P}$  = 74.0 Hz), 28.5 (q,  $J_{C-F}$  = 30.7 Hz).

**<sup>19</sup>F NMR (471 MHz, DMSO)** δ -63.15 (s, 3F).

**<sup>31</sup>P NMR (202 MHz, DMSO)** δ 29.48 (s, 1P).

**IR (neat):**  $\nu$  = 3300, 1639, 1287, 1143, 1115, 694, 656, 546  $\text{cm}^{-1}$ .

**ESI-HRMS (ESI-TOF):**  $m/z$  calcd for  $\text{C}_{33}\text{H}_{27}\text{F}_3\text{KNO}_3\text{PS}^+$  [M+K]<sup>+</sup>: 644.1033, found 644.1021.

**Compound 4w** (*E*)-diphenyl(phenyl)((4,4,4-trifluoro-2-(methylsulfonyl)but-1-en-1-yl)amino)methyl)phosphine oxide

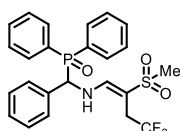

Chemical formula: C<sub>24</sub>H<sub>23</sub>F<sub>3</sub>NO<sub>3</sub>PS

Molecular weight: 493.48 g.mol<sup>-1</sup>

White solid

Melting point: 205–207 °C

Yield: 70%

**<sup>1</sup>H NMR (500 MHz, DMSO)** δ 8.05–8.01 (m, 2H), 7.89–7.79 (m, 3H), 7.59–7.52 (m, 3H), 7.49–7.40 (m, 6H), 7.22–7.16 (m, 3H), 6.06 (dd, *J* = 9.5 Hz, *J* = 6.5 Hz, 1H), 3.51–3.44 (m, 1H), 3.24–3.14 (m, 1H), 2.62 (s, 3H).

**<sup>13</sup>C NMR (126 MHz, DMSO)** δ 150.8 (d, *J*<sub>C-P</sub> = 5.2 Hz), 135.4, 131.9 (d, *J*<sub>C-P</sub> = 2.6 Hz), 131.9 (d, *J*<sub>C-P</sub> = 2.6 Hz), 131.5 (d, *J*<sub>C-P</sub> = 96.4 Hz), 131.2 (d, *J*<sub>C-P</sub> = 94.0 Hz), 131.2 (d, *J*<sub>C-P</sub> = 9.1 Hz), 131.0 (d, *J*<sub>C-P</sub> = 8.9 Hz), 129.0 (d, *J*<sub>C-P</sub> = 4.9 Hz), 128.6 (d, *J*<sub>C-P</sub> = 8.1 Hz), 128.5 (d, *J*<sub>C-P</sub> = 8.1 Hz), 128.0 (d, *J*<sub>C-P</sub> = 1.3 Hz), 127.8 (d, *J*<sub>C-P</sub> = 1.9 Hz), 126.4 (q, *J*<sub>C-F</sub> = 280.0 Hz), 95.2, 61.7 (d, *J*<sub>C-P</sub> = 73.5 Hz), 44.4, 28.5 (q, *J*<sub>C-F</sub> = 30.4 Hz).

**<sup>19</sup>F NMR (471 MHz, DMSO)** δ -63.21 (s, 3F).

**<sup>31</sup>P NMR (202 MHz, DMSO)** δ 29.52 (s, 1P).

**IR (neat):** ν = 3224, 1637, 1248, 1115, 1025, 693, 543 cm<sup>-1</sup>.

**ESI-HRMS (ESI-TOF):** *m/z* calcd for C<sub>24</sub>H<sub>23</sub>F<sub>3</sub>KNO<sub>3</sub>PS<sup>+</sup> [M+K]<sup>+</sup>: 532.0720, found 532.0711.

**Compound 4x** (*E*)-((2-(cyclopropylsulfonyl)-4,4,4-trifluorobut-1-en-1-yl)amino)(phenyl)methyl)diphenylphosphine oxide

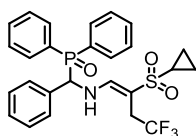

Chemical formula: C<sub>26</sub>H<sub>25</sub>F<sub>3</sub>NO<sub>3</sub>PS

Molecular weight: 519.52 g.mol<sup>-1</sup>

White solid

Melting point: 161–163 °C

Yield: 76%

**<sup>1</sup>H NMR (500 MHz, DMSO)** δ 8.04–8.00 (m, 2H), 7.90–7.85 (m, 1H), 7.81–7.77 (m, 2H), 7.58–7.52 (m, 3H), 7.49–7.45 (m, 1H), 7.43–7.37 (m, 5H), 7.22–7.17 (m, 3H), 6.05 (dd, *J* = 9.5 Hz, *J* = 7.5 Hz, 1H), 3.53–3.43 (m, 1H), 3.25–3.14 (m, 1H), 2.28–2.23 (m, 1H), 0.89–0.79 (m, 2H), 0.78–0.68 (m, 2H).

**<sup>13</sup>C NMR (126 MHz, DMSO)** δ 150.7 (d, *J*<sub>C-P</sub> = 6.0 Hz), 135.6, 131.8 (d, *J*<sub>C-P</sub> = 2.6 Hz), 131.7 (d, *J*<sub>C-P</sub> = 2.6 Hz), 131.5 (d, *J*<sub>C-P</sub> = 96.5 Hz), 131.4 (d, *J*<sub>C-P</sub> = 93.9 Hz), 131.1 (d, *J*<sub>C-P</sub> = 9.1 Hz), 130.9 (d, *J*<sub>C-P</sub> = 8.9 Hz), 128.9 (d, *J*<sub>C-P</sub> = 4.9 Hz), 128.5 (d, *J*<sub>C-P</sub> = 11.5 Hz), 128.4 (d, *J*<sub>C-P</sub> = 11.3 Hz), 127.9, 127.6 (d, *J*<sub>C-P</sub> = 1.8 Hz), 126.3 (q, *J*<sub>C-F</sub> = 279.7 Hz), 94.7, 61.4 (d, *J*<sub>C-P</sub> = 74.1 Hz), 32.7, 28.7 (q, *J*<sub>C-F</sub> = 31.2 Hz), 5.2, 5.1.

**<sup>19</sup>F NMR (471 MHz, DMSO)** δ -63.34 (s, 3F).

**<sup>31</sup>P NMR (202 MHz, DMSO)** δ 29.38 (s, 1P).

**IR (neat):** ν = 3228, 2927, 1637, 1253, 1116, 692, 540 cm<sup>-1</sup>.

**ESI-HRMS (ESI-TOF):** *m/z* calcd for C<sub>26</sub>H<sub>25</sub>F<sub>3</sub>KNO<sub>3</sub>PS<sup>+</sup> [M+K]<sup>+</sup>: 558.0876, found 558.0855.

**Compound 4y** (*E*)-diphenyl(phenyl)((4,4,4-trifluoro-2-(thiophen-2-ylsulfonyl)but-1-en-1-yl)amino)methyl)phosphine oxide

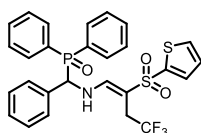

Chemical formula: C<sub>27</sub>H<sub>23</sub>F<sub>3</sub>NO<sub>3</sub>PS<sub>2</sub>

Molecular weight: 561.57 g.mol<sup>-1</sup>

White solid

Melting point: 242–244 °C

Yield: 87%

**<sup>1</sup>H NMR (500 MHz, DMSO)** δ 8.20–8.15 (m, 1H), 8.04–8.00 (m, 2H), 7.84–7.76 (m, 4H), 7.60–7.40 (m, 8H), 7.23–7.17 (m, 4H), 7.09–7.07 (m, 1H), 6.17 (dd, *J* = 9.5 Hz, *J* = 7.0 Hz, 1H), 3.38–3.31 (m, 1H), 3.19–3.09 (m, 1H).

**<sup>13</sup>C NMR (126 MHz, DMSO)** δ 151.6 (d, *J*<sub>C-P</sub> = 6.2 Hz), 145.8, 135.5, 132.2, 131.9, 131.4 (d, *J*<sub>C-P</sub> = 95.0 Hz), 131.3 (d, *J*<sub>C-P</sub> = 95.0 Hz), 131.1 (d, *J*<sub>C-P</sub> = 8.9 Hz), 130.9 (d, *J*<sub>C-P</sub> = 8.9 Hz), 130.9, 128.9 (d, *J*<sub>C-P</sub> = 4.8 Hz), 128.7 (d, *J*<sub>C-P</sub> = 11.5 Hz), 128.5 (d, *J*<sub>C-P</sub> = 11.3 Hz), 128.0, 127.8, 127.5, 126.0 (q, *J*<sub>C-F</sub> = 280.5 Hz), 95.3, 61.5 (d, *J*<sub>C-P</sub> = 73.7 Hz), 28.5 (q, *J*<sub>C-F</sub> = 30.6 Hz).

**<sup>19</sup>F NMR (471 MHz, DMSO)** δ -63.31 (s, 3F).

**<sup>31</sup>P NMR (202 MHz, DMSO)** δ 29.30 (s, 1P).

**IR (neat):** ν = 3307, 3063, 1639, 1117, 684, 606, 539 cm<sup>-1</sup>.

**ESI-HRMS (ESI-TOF):** *m/z* calcd for C<sub>27</sub>H<sub>24</sub>F<sub>3</sub>NO<sub>3</sub>PS<sub>2</sub><sup>+</sup> [M+H]<sup>+</sup>: 562.0882, found 562.0875.

**Compound 4z** (*E*)-(phenyl((4,4,4-trifluoro-2-tosylbut-1-en-1-yl)amino)methyl)di-*p*-tolylphosphine oxide

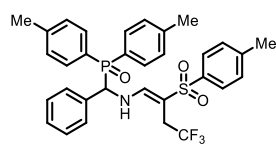

Chemical formula: C<sub>32</sub>H<sub>31</sub>F<sub>3</sub>NO<sub>3</sub>PS

Molecular weight: 597.63 g.mol<sup>-1</sup>

White solid

Melting point: 253–255 °C

Yield: 79%

**<sup>1</sup>H NMR (300 MHz, DMSO)** δ 8.07–7.99 (m, 1H), 7.93–7.87 (m, 2H), 7.77 (d, *J* = 13.2 Hz, 1H), 7.67–7.61 (m, 2H), 7.45–7.41 (m, 2H), 7.37–7.32 (m, 4H), 7.29–7.20 (m, 7H), 6.09 (dd, *J* = 9.3 Hz, *J* = 6.9 Hz, 1H), 3.27–3.15 (m, 1H), 3.12–2.99 (m, 1H), 2.37 (s, 3H), 2.35 (s, 3H), 2.28 (s, 3H).

**<sup>13</sup>C NMR (126 MHz, DMSO)** δ 151.5 (d, *J*<sub>C-P</sub> = 5.7 Hz), 141.8, 141.7 (d, *J*<sub>C-P</sub> = 2.6 Hz), 141.5 (d, *J*<sub>C-P</sub> = 2.6 Hz), 140.8, 135.7, 131.0 (d, *J*<sub>C-P</sub> = 9.2 Hz), 130.8 (d, *J*<sub>C-P</sub> = 9.3 Hz), 129.2, 129.1 (d, *J*<sub>C-P</sub> = 11.7 Hz), 128.9 (d, *J*<sub>C-P</sub> = 12.2 Hz), 128.5 (d, *J*<sub>C-P</sub> = 100.0 Hz) x 2, 127.9, 127.6, 126.1, 125.9 (q, *J*<sub>C-F</sub> = 280.2 Hz), 94.1, 61.5 (d, *J*<sub>C-P</sub> = 74.0 Hz), 28.3 (q, *J*<sub>C-F</sub> = 30.4 Hz), 21.1, 21.0, 20.9.

**<sup>19</sup>F NMR (471 MHz, DMSO)** δ -63.12 (s, 3F).

**<sup>31</sup>P NMR (202 MHz, DMSO)** δ 29.77 (s, 1P).

**IR (neat):** ν = 3224, 2970, 1638, 1247, 1133, 1024, 660, 537 cm<sup>-1</sup>.

**ESI-HRMS (ESI-TOF):** m/z calcd for C<sub>32</sub>H<sub>31</sub>F<sub>3</sub>KNO<sub>3</sub>PS<sup>+</sup> [M+K]<sup>+</sup>: 636.1346, found 636.1360.

**Compound 4aa** (*E*)-bis(4-(*tert*-butyl)phenyl)(phenyl((4,4,4-trifluoro-2-tosylbut-1-en-1-yl)amino)methyl)phosphine oxide

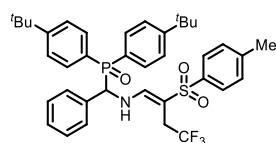

Chemical formula: C<sub>38</sub>H<sub>43</sub>F<sub>3</sub>NO<sub>3</sub>PS

Molecular weight: 681.79 g.mol<sup>-1</sup>

White solid

Melting point: 230–232 °C

Yield: 72%

**<sup>1</sup>H NMR (500 MHz, DMSO)** δ 8.01–7.96 (m, 1H), 7.92–7.88 (m, 2H), 7.86 (d, *J* = 13.0 Hz, 1H), 7.73–7.69 (m, 2H), 7.53–7.51 (m, 2H), 7.46–7.43 (m, 4H), 7.41–7.39 (m, 2H), 7.34–7.32 (m, 2H), 7.22–7.21 (m, 3H), 6.12 (dd, *J* = 9.5 Hz, *J* = 7.5 Hz, 1H), 3.33–3.28 (m, 1H), 3.07–2.97 (m, 1H), 1.23 (s, 10H), 1.20 (s, 10H).

**<sup>13</sup>C NMR (126 MHz, DMSO)** δ 154.7 (d, *J*<sub>C-P</sub> = 2.6 Hz), 154.4 (d, *J*<sub>C-P</sub> = 2.6 Hz), 151.7 (d, *J*<sub>C-P</sub> = 6.5 Hz), 141.8, 141.2, 135.9, 130.8 (d, *J*<sub>C-P</sub> = 9.1 Hz), 130.7 (d, *J*<sub>C-P</sub> = 9.3 Hz), 129.3, 128.9 (d, *J*<sub>C-P</sub> = 4.7 Hz), 128.7 (d, *J*<sub>C-P</sub> = 97.3 Hz), 128.5 (d, *J*<sub>C-P</sub> = 99.7 Hz), 128.0, 127.7, 126.3, 125.9 (q, *J*<sub>C-F</sub> = 280.5 Hz), 125.4 (d, *J*<sub>C-P</sub> = 4.5 Hz), 125.3 (d, *J*<sub>C-P</sub> = 4.5 Hz), 94.8, 61.2 (d, *J*<sub>C-P</sub> = 73.8 Hz), 34.7, 34.6, 30.8, 30.7, 28.4 (q, *J*<sub>C-F</sub> = 31.2 Hz), 20.9.

**<sup>19</sup>F NMR (471 MHz, DMSO)** δ -63.50 (s, 3F).

**<sup>31</sup>P NMR (202 MHz, DMSO)** δ 29.48 (s, 1P).

**IR (neat):** ν = 3220, 2965, 1638, 1251, 1128, 663, 588 cm<sup>-1</sup>.

**ESI-HRMS (ESI-TOF):** m/z calcd for C<sub>38</sub>H<sub>44</sub>F<sub>3</sub>NO<sub>3</sub>PS<sup>+</sup> [M+H]<sup>+</sup>: 682.2726, found 682.2705.

**Compound 4ab** (*E*)-bis(4-methoxyphenyl)(phenyl((4,4,4-trifluoro-2-tosylbut-1-en-1-yl)amino)methyl)phosphine oxide

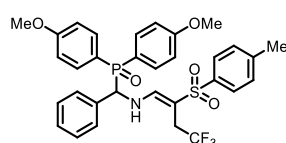

Chemical formula: C<sub>32</sub>H<sub>31</sub>F<sub>3</sub>NO<sub>5</sub>PS

Molecular weight: 629.63 g.mol<sup>-1</sup>

White solid

Melting point: 227–229 °C

Yield: 66%

**<sup>1</sup>H NMR (500 MHz, DMSO)** δ 8.00–7.90 (m, 3H), 7.74 (d, *J* = 13.0 Hz, 1H), 7.68–7.64 (m, 2H), 7.44–7.41 (m, 2H), 7.35–7.33 (m, 2H), 7.27–7.18 (m, 5H), 7.08–7.05 (m, 2H), 6.97–6.94 (m, 2H), 6.02 (dd, *J* = 9.5 Hz, *J* = 7.0 Hz, 1H), 3.79 (s, 3H), 3.74 (s, 3H), 3.32–3.22 (m, 1H), 3.14–3.04 (m, 1H), 2.35 (s, 3H).

**<sup>13</sup>C NMR (126 MHz, DMSO)** δ 161.9 (d, *J*<sub>C-P</sub> = 2.6 Hz), 161.9 (d, *J*<sub>C-P</sub> = 2.8 Hz), 151.6 (d, *J*<sub>C-P</sub> = 5.5 Hz), 142.0, 140.9, 135.9, 133.0 (d, *J*<sub>C-P</sub> = 10.2 Hz), 132.8 (d, *J*<sub>C-P</sub> = 10.3 Hz), 129.3, 128.9 (d, *J*<sub>C-P</sub> = 4.8 Hz), 128.0, 127.7, 126.2, 126.0 (q, *J*<sub>C-F</sub> = 280.5 Hz), 122.8 (d, *J*<sub>C-P</sub> = 103.4 Hz), 122.7 (d, *J*<sub>C-P</sub> = 101.9 Hz), 114.3 (d, *J*<sub>C-P</sub> = 12.3 Hz), 114.1 (d, *J*<sub>C-P</sub> = 12.3 Hz), 94.1, 61.9 (d, *J*<sub>C-P</sub> = 74.1 Hz), 55.4, 55.4, 28.5 (q, *J*<sub>C-F</sub> = 31.0 Hz), 21.0.

**<sup>19</sup>F NMR (282 MHz, DMSO)** δ -63.08 (s, 3F).

**<sup>31</sup>P NMR (121 MHz, DMSO)** δ 29.60 (s, 1P).

**IR (neat):** ν = 3214, 1638, 1598, 1250, 1171, 1130, 1080, 772, 661, 541 cm<sup>-1</sup>.

**ESI-HRMS (ESI-TOF):** m/z calcd for C<sub>32</sub>H<sub>32</sub>F<sub>3</sub>NO<sub>5</sub>PS<sup>+</sup> [M+H]<sup>+</sup>: 630.1685, found 630.1668.

**Compound 4ac** (*E*)-(phenyl((4,4,4-trifluoro-2-tosylbut-1-en-1-yl)amino)methyl)bis(4-(trifluoromethyl)phenyl)phosphine oxide

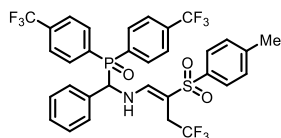

Chemical formula: C<sub>32</sub>H<sub>25</sub>F<sub>9</sub>NO<sub>3</sub>PS

Molecular weight: 705.57 g.mol<sup>-1</sup>

White solid

Melting point: 228–230 °C

Yield: 84%

<sup>1</sup>H NMR (500 MHz, DMSO) δ 8.34–8.31 (m, 2H), 8.22–8.17 (m, 1H), 8.10–8.07 (m, 2H), 7.91–7.89 (m, 2H), 7.86–7.83 (m, 3H), 7.46–7.43 (m, 4H), 7.31–7.21 (m, 5H), 6.42 (dd, *J* = 9.5 Hz, *J* = 7.5 Hz, 1H), 3.39–3.30 (m, 1H), 3.09–3.00 (m, 1H), 2.34 (s, 3H).

<sup>13</sup>C NMR (126 MHz, DMSO) δ 151.2 (d, *J*<sub>C-P</sub> = 6.7 Hz), 142.1, 140.7, 135.7 (d, *J*<sub>C-P</sub> = 91.4 Hz), 135.7 (d, *J*<sub>C-P</sub> = 94.1 Hz), 134.6, 132.2 (q, *J*<sub>C-F</sub> = 32.3 Hz), 132.1 (q, *J*<sub>C-F</sub> = 32.3 Hz), 132.1 (d, *J*<sub>C-P</sub> = 9.3 Hz), 131.9 (d, *J*<sub>C-P</sub> = 9.4 Hz), 129.3, 128.9 (d, *J*<sub>C-P</sub> = 4.9 Hz), 128.3, 128.2, 126.2, 125.9 (q, *J*<sub>C-F</sub> = 280.4 Hz), 125.6 (q, *J*<sub>C-F</sub> = 3.9 Hz), 125.5 (q, *J*<sub>C-F</sub> = 4.8 Hz), 123.7 (q, *J*<sub>C-F</sub> = 273.4 Hz), 123.6 (q, *J*<sub>C-F</sub> = 273.4 Hz), 95.7, 61.2 (d, *J*<sub>C-P</sub> = 75.8 Hz), 28.4 (q, *J*<sub>C-F</sub> = 31.1 Hz), 20.9.

<sup>19</sup>F NMR (471 MHz, DMSO) δ -61.77 (s, 3F), -61.82 (s, 3F), -63.50 (s, 3F).

<sup>31</sup>P NMR (202 MHz, DMSO) δ 27.86 (s, 1P).

IR (neat): ν = 3250, 1638, 1391, 1127, 1016, 700, 546 cm<sup>-1</sup>.

ESI-HRMS (ESI-TOF): *m/z* calcd for C<sub>32</sub>H<sub>25</sub>F<sub>9</sub>KNO<sub>3</sub>PS<sup>+</sup> [M+K]<sup>+</sup>: 744.0781, found 744.0759.

**Compound 4ad** (*E*)-bis(3,5-dimethylphenyl)(phenyl((4,4,4-trifluoro-2-tosylbut-1-en-1-yl)amino)methyl)phosphine oxide

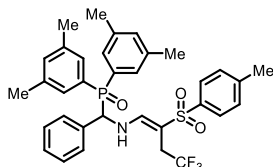

Chemical formula: C<sub>34</sub>H<sub>35</sub>F<sub>3</sub>NO<sub>3</sub>PS

Molecular weight: 625.69 g.mol<sup>-1</sup>

White solid

Melting point: 248–250 °C

Yield: 81%

<sup>1</sup>H NMR (500 MHz, DMSO) δ 7.96–7.91 (m, 1H), 7.70 (d, *J* = 13.5 Hz, 1H), 7.60–7.58 (m, 2H), 7.49–7.47 (m, 2H), 7.43–7.41 (m, 2H), 7.31–7.29 (m, 2H), 7.26–7.17 (m, 6H), 7.09 (s, 1H), 6.06 (dd, *J* = 9.5 Hz, *J* = 6.5 Hz, 1H), 3.30–3.21 (m, 1H), 3.14–3.04 (m, 1H), 2.35 (s, 3H), 2.29 (s, 6H), 2.23 (s, 6H).

<sup>13</sup>C NMR (126 MHz, DMSO) δ 151.4 (d, *J*<sub>C-P</sub> = 5.4 Hz), 142.1, 140.7, 137.8 (d, *J*<sub>C-P</sub> = 12.1 Hz), 137.7 (d, *J*<sub>C-P</sub> = 12.1 Hz), 135.8, 133.3 (d, *J*<sub>C-P</sub> = 2.6 Hz), 133.2 (d, *J*<sub>C-P</sub> = 2.6 Hz), 131.4 (d, *J*<sub>C-P</sub> = 95.9 Hz), 131.2 (d, *J*<sub>C-P</sub> = 94.0 Hz), 129.3, 129.1 (d, *J*<sub>C-P</sub> = 4.9 Hz), 128.7 (d, *J*<sub>C-P</sub> = 8.9 Hz), 128.5 (d, *J*<sub>C-P</sub> = 8.8 Hz), 128.0, 127.7, 126.1, 126.0 (q, *J*<sub>C-F</sub> = 280.5 Hz), 94.0, 61.5 (d, *J*<sub>C-P</sub> = 73.5 Hz), 28.5 (q, *J*<sub>C-F</sub> = 31.0 Hz), 21.0, 21.0, 20.9.

<sup>19</sup>F NMR (282 MHz, DMSO) δ -63.07 (s, 3F).

<sup>31</sup>P NMR (121 MHz, DMSO) δ 29.68 (s, 1P).

IR (neat): ν = 3221, 1636, 1251, 1133, 1027, 662, 578 cm<sup>-1</sup>.

ESI-HRMS (ESI-TOF): *m/z* calcd for C<sub>34</sub>H<sub>36</sub>F<sub>3</sub>NO<sub>3</sub>PS<sup>+</sup> [M+H]<sup>+</sup>: 626.2100, found 626.2058.

**Compound 4ae** (*E*)-di(naphthalen-1-yl)(phenyl((4,4,4-trifluoro-2-tosylbut-1-en-1-yl)amino)methyl)phosphine oxide

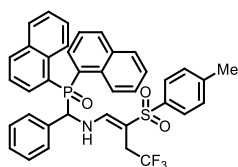

Chemical formula: C<sub>38</sub>H<sub>31</sub>F<sub>3</sub>NO<sub>3</sub>PS

Molecular weight: 669.70 g.mol<sup>-1</sup>

White solid

Melting point: 185–187 °C

Yield: 42%

<sup>1</sup>H NMR (500 MHz, DMSO) δ 8.67 (d, *J* = 9.0 Hz, 1H), 8.61 (d, *J* = 8.5 Hz, 1H), 8.42–8.38 (m, 1H), 8.20 (d, *J* = 8.0 Hz, 1H), 8.10–7.97 (m, 4H), 7.89–7.84 (m, 2H), 7.67–7.63 (m, 1H), 7.49–7.41 (m, 5H), 7.39–7.30 (m, 6H), 7.07–7.03 (m, 3H), 6.48–6.45 (m, 1H), 3.38–3.35 (m, 1H), 3.18–3.08 (m, 1H), 2.37 (s, 3H).

<sup>13</sup>C NMR (126 MHz, DMSO) δ 151.1 (d, *J*<sub>C-P</sub> = 7.7 Hz), 142.2, 140.7, 136.1, 133.6 (d, *J*<sub>C-P</sub> = 8.7 Hz), 133.4 (d, *J*<sub>C-P</sub> = 7.2 Hz), 133.3, 133.2 (d, *J*<sub>C-P</sub> = 1.1 Hz), 133.1 (d, *J*<sub>C-P</sub> = 1.1 Hz), 133.0 (d, *J*<sub>C-P</sub> = 8.9 Hz), 132.5 (d, *J*<sub>C-P</sub> = 10.4 Hz), 132.2 (d, *J*<sub>C-P</sub> = 9.8 Hz), 129.4, 129.2, 128.9 (d, *J*<sub>C-P</sub> = 4.8 Hz), 128.7, 127.9 (d, *J*<sub>C-P</sub> = 93.7 Hz), 127.8 (d, *J*<sub>C-P</sub> = 92.1 Hz), 127.8, 127.7, 127.1, 126.8, 126.3, 126.2, 126.2, 126.1 (q, *J*<sub>C-F</sub> = 280.2 Hz), 125.7 (d, *J*<sub>C-P</sub> = 3.9 Hz), 124.6 (d, *J*<sub>C-P</sub> = 9.2 Hz), 124.5 (d, *J*<sub>C-P</sub> = 9.4 Hz), 95.9, 61.1 (d, *J*<sub>C-P</sub> = 76.2 Hz), 28.5 (q, *J*<sub>C-F</sub> = 30.9 Hz), 21.0.

<sup>19</sup>F NMR (471 MHz, DMSO) δ -62.98 (s, 3F).

<sup>31</sup>P NMR (202 MHz, DMSO) δ 35.59 (s, 1P).

IR (neat): ν = 3318, 3044, 1635, 1252, 1126, 1080, 772, 685, 553 cm<sup>-1</sup>.

ESI-HRMS (ESI-TOF): *m/z* calcd for C<sub>38</sub>H<sub>32</sub>F<sub>3</sub>NO<sub>3</sub>PS<sup>+</sup> [M+H]<sup>+</sup>: 670.1787, found 670.1745.

**Compound 7a** *N*-benzyl-4-methyl-*N*-(propa-1,2-dien-1-yl)benzenesulfonamide

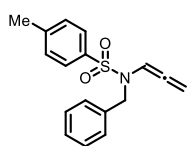

Chemical formula: C<sub>17</sub>H<sub>17</sub>NO<sub>2</sub>S  
Molecular weight: 299.39 g.mol<sup>-1</sup>

<sup>1</sup>H NMR (400 MHz, CDCl<sub>3</sub>) δ 7.73 (d, *J* = 8.0 Hz, 2H), 7.33 (m, 7H), 6.84 (t, *J* = 6.0 Hz, 1H), 5.15 (d, *J* = 6.0 Hz, 2H), 4.30 (s, 2H), 2.45 (s, 3H).

Data match with those described in the literature.<sup>8</sup>

**Compound 7b** *N*-(4-methoxybenzyl)-4-methyl-*N*-(propa-1,2-dien-1-yl)benzenesulfonamide

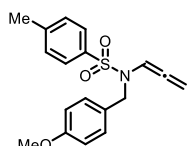

Chemical formula: C<sub>18</sub>H<sub>19</sub>NO<sub>3</sub>S  
Molecular weight: 329.41 g.mol<sup>-1</sup>

<sup>1</sup>H NMR (400 MHz, CDCl<sub>3</sub>) δ 7.72 (d, *J* = 7.6 Hz, 2H), 7.33 (d, *J* = 7.7 Hz, 2H), 7.24 (d, *J* = 8.0 Hz, 2H), 6.83–6.78 (m, 3H), 5.17 (d, *J* = 6.1 Hz, 2H), 4.23 (s, 2H), 3.79 (s, 3H), 2.44 (s, 3H).

Data match with those described in the literature.<sup>8</sup>

**Compound 7c** 4-Methyl-*N*-(propa-1,2-dien-1-yl)-*N*-(4-(trifluoromethyl)benzyl)benzenesulfonamide

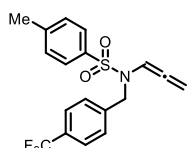

Chemical formula: C<sub>18</sub>H<sub>16</sub>F<sub>3</sub>NO<sub>2</sub>S  
Molecular weight: 367.39 g.mol<sup>-1</sup>

<sup>1</sup>H NMR (400 MHz, CDCl<sub>3</sub>) δ 7.71 (d, *J* = 8.3 Hz, 2H), 7.54 (d, *J* = 8.2 Hz, 2H), 7.41 (d, *J* = 8.1 Hz, 2H), 7.33 (d, *J* = 8.2 Hz, 2H), 6.87 (t, *J* = 6.2 Hz, 1H), 5.15 (d, *J* = 6.2 Hz, 2H), 4.35 (s, 2H), 2.44 (s, 3H).

Data match with those described in the literature.<sup>8</sup>

**Compound 7d** *N*-(4-chlorobenzyl)-4-methyl-*N*-(propa-1,2-dien-1-yl)benzenesulfonamide

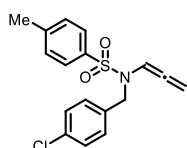

Chemical formula: C<sub>17</sub>H<sub>16</sub>ClNO<sub>2</sub>S  
Molecular weight: 333.83 g.mol<sup>-1</sup>

<sup>1</sup>H NMR (500 MHz, CDCl<sub>3</sub>) δ 7.59–7.57 (m, 2H), 7.19–7.11 (m, 6H), 6.70 (t, *J* = 6.0 Hz, 1H), 5.01 (d, *J* = 6.0 Hz, 2H), 4.13 (s, 2H), 2.28 (s, 3H).

Data match with those described in the literature.<sup>9</sup>

**Compound 7e** *N*-(benzo[*d*][1,3]dioxol-5-ylmethyl)-4-methyl-*N*-(propa-1,2-dien-1-yl)benzenesulfonamide

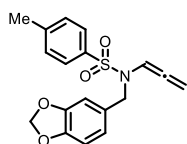

Chemical formula: C<sub>18</sub>H<sub>17</sub>NO<sub>4</sub>S  
Molecular weight: 343.40 g.mol<sup>-1</sup>

<sup>1</sup>H NMR (400 MHz, CDCl<sub>3</sub>) δ 7.71 (d, *J* = 8.2 Hz, 2H), 7.33 (d, *J* = 8.0 Hz, 2H), 6.84 (s, 1H), 6.80 (t, *J* = 6.2 Hz, 1H), 6.72 (q, *J* = 14.4 Hz, *J* = 8.1 Hz, 2H), 5.93 (s, 2H), 5.19 (d, *J* = 6.2 Hz, 2H), 4.19 (s, 2H), 2.44 (s, 3H).

Data match with those described in the literature.<sup>8</sup>



**Compound 7f** 4-Methyl-*N*-(propa-1,2-dien-1-yl)-*N*-(thiophen-2-ylmethyl)benzenesulfonamide

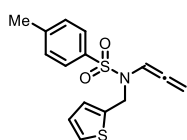

Chemical formula: C<sub>15</sub>H<sub>15</sub>NO<sub>2</sub>S<sub>2</sub>  
Molecular weight: 305.41 g.mol<sup>-1</sup>  
Yellow liquid

**<sup>1</sup>H NMR (500 MHz, CDCl<sub>3</sub>)** δ 7.66–7.64 (m, 2H), 7.28–7.26 (m, 2H), 7.19–7.17 (m, 1H), 6.95–6.94 (m, 1H), 6.89–6.88 (m, 1H), 6.82–6.79 (m, 1H), 5.32 (d, *J* = 6.0 Hz, 2H), 4.54 (s, 2H), 2.42 (s, 3H).

**<sup>13</sup>C NMR (126 MHz, CDCl<sub>3</sub>)** δ 201.6, 143.9, 138.6, 135.6, 129.8, 127.4, 127.3, 126.5, 125.8, 100.0, 88.9, 45.1, 21.7.

**IR (neat):** ν = 2924, 1347, 1158, 1090, 663, 544 cm<sup>-1</sup>.

**ESI-HRMS (ESI-TOF):** *m/z* calcd for C<sub>15</sub>H<sub>15</sub>NNaO<sub>2</sub>S<sub>2</sub><sup>+</sup> [M+Na]<sup>+</sup>: 328.0436, found 328.0441.

**Compound 7g** 4-Methyl-*N*-phenyl-*N*-(propa-1,2-dien-1-yl)benzenesulfonamide

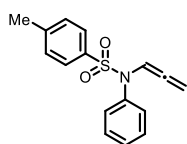

Chemical formula: C<sub>16</sub>H<sub>15</sub>NO<sub>2</sub>S  
Molecular weight: 285.36 g.mol<sup>-1</sup>

**<sup>1</sup>H NMR (300 MHz, CDCl<sub>3</sub>)** δ = 7.56 (d, *J* = 8.3 Hz, 2H), 7.32–7.22 (m, 5H), 7.11 (t, *J* = 6.3 Hz, 1H), 7.06–6.96 (m, 2H), 5.02 (d, *J* = 6.4 Hz, 2H), 2.44 (s, 3H).

Data match with those described in the literature.<sup>10</sup>

**Compound 7h** *N*-(4-methoxyphenyl)-4-methyl-*N*-(propa-1,2-dien-1-yl)benzenesulfonamide

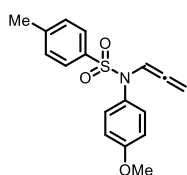

Chemical formula: C<sub>17</sub>H<sub>17</sub>NO<sub>3</sub>S  
Molecular weight: 315.39 g.mol<sup>-1</sup>

**<sup>1</sup>H NMR (300 MHz, CDCl<sub>3</sub>)** δ = 7.55 (d, *J* = 8.0 Hz, 2H), 7.27 (d, *J* = 8.0 Hz, 2H), 7.12 (t, *J* = 6.2 Hz, 1H), 6.93–6.85 (m, 2H), 6.82–6.74 (m, 2H), 5.03 (d, *J* = 6.2 Hz, 2H), 3.79 (s, 3H), 2.44 (s, 3H).

Data match with those described in the literature.<sup>10</sup>

**Compound 7i** *N*-(3-methoxyphenyl)-4-methyl-*N*-(propa-1,2-dien-1-yl)benzenesulfonamide

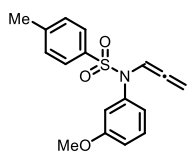

Chemical formula: C<sub>17</sub>H<sub>17</sub>NO<sub>3</sub>S  
Molecular weight: 315.39 g.mol<sup>-1</sup>  
Yellow liquid

**<sup>1</sup>H NMR (500 MHz, CDCl<sub>3</sub>)** δ 7.59–7.57 (m, 2H), 7.29–7.27 (m, 2H), 7.18–7.15 (m, 1H), 7.08 (t, *J* = 6.5 Hz, 1H), 6.86–6.84 (m, 1H), 6.58–6.55 (m, 2H), 5.04 (d, *J* = 6.0 Hz, 2H), 3.71 (s, 3H), 2.44 (s, 3H).

**<sup>13</sup>C NMR (126 MHz, CDCl<sub>3</sub>)** δ 201.3, 159.9, 144.1, 138.4, 135.5, 129.7, 129.4, 127.9, 121.8, 115.1, 114.9, 102.4, 87.6, 55.4, 21.8.

**IR (neat):** ν = 2960, 1601, 1487, 1358, 1167, 691, 578 cm<sup>-1</sup>.

**ESI-HRMS (ESI-TOF):** *m/z* calcd for C<sub>17</sub>H<sub>17</sub>KNO<sub>3</sub>S<sup>+</sup> [M+K]<sup>+</sup>: 354.0561, found 354.0545.

**Compound 7j** 4-Methyl-*N*-(propa-1,2-dien-1-yl)-*N*-(*o*-tolyl)benzenesulfonamide

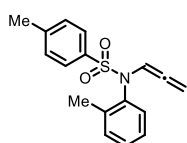

Chemical formula: C<sub>17</sub>H<sub>17</sub>NO<sub>2</sub>S  
Molecular weight: 299.39 g.mol<sup>-1</sup>  
Yellow liquid

**<sup>1</sup>H NMR (500 MHz, CDCl<sub>3</sub>)** δ 7.65–7.63 (m, 2H), 7.30 (d, *J* = 9.0 Hz, 2H), 7.25–7.20 (m, 2H), 7.14 (t, *J* = 6.0 Hz, 1H), 7.03–7.00 (m, 1H), 6.55 (d, *J* = 8.0 Hz, 1H), 4.98 (d, *J* = 7.0 Hz, 2H), 2.45 (s, 3H), 2.27 (s, 3H).

**<sup>13</sup>C NMR (126 MHz, CDCl<sub>3</sub>)** δ 201.2, 144.0, 139.3, 136.4, 136.1, 131.3, 129.8, 129.4, 129.1, 127.8, 126.1, 102.4, 87.4, 21.8, 18.1.

**IR (neat):** ν = 2977, 1491, 1356, 1164, 663, 583 cm<sup>-1</sup>.

**ESI-HRMS (ESI-TOF):** m/z calcd for C<sub>17</sub>H<sub>18</sub>NO<sub>2</sub>S<sup>+</sup> [M+H]<sup>+</sup>: 300.1053, found 300.1040.

**Compound 7k** 4-Methyl-*N*-octyl-*N*-(propa-1,2-dien-1-yl)benzenesulfonamide

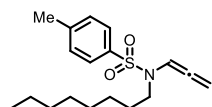

Chemical formula: C<sub>18</sub>H<sub>27</sub>NO<sub>2</sub>S

Molecular weight: 321.48 g.mol<sup>-1</sup>

Yellow liquid

**<sup>1</sup>H NMR (500 MHz, CDCl<sub>3</sub>)** δ 7.68–7.66 (m, 2H), 7.30–7.28 (m, 2H), 6.82–6.80 (m, 1H), 5.27 (d, *J* = 6.5 Hz, 2H), 3.09–3.06 (m, 2H), 2.41 (s, 3H), 1.53–1.50 (m, 2H), 1.28–1.24 (m, 10H), 0.86 (t, *J* = 6.5 Hz, 3H).

**<sup>13</sup>C NMR (126 MHz, CDCl<sub>3</sub>)** δ 201.6, 143.7, 135.7, 129.8, 127.2, 100.2, 87.4, 46.7, 31.9, 29.3, 29.3, 28.0, 26.6, 22.7, 21.6, 14.2.

**IR (neat):** ν = 2925, 2855, 1356, 1163, 1094, 664, 590, 546 cm<sup>-1</sup>.

**ESI-HRMS (ESI-TOF):** m/z calcd for C<sub>18</sub>H<sub>27</sub>KNO<sub>2</sub>S<sup>+</sup> [M+K]<sup>+</sup>: 360.1394, found 360.1374.

**Compound 7l** *N*-cyclopropyl-4-methyl-*N*-(propa-1,2-dien-1-yl)benzenesulfonamide

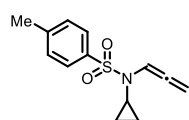

Chemical formula: C<sub>13</sub>H<sub>15</sub>NO<sub>2</sub>S

Molecular weight: 249.33 g.mol<sup>-1</sup>

**<sup>1</sup>H NMR (300 MHz, CDCl<sub>3</sub>)** δ = 7.74 (d, *J* = 8.2 Hz, 2H), 7.33 (d, *J* = 8.0 Hz, 2H), 6.76 (t, *J* = 6.2 Hz, 1H), 5.23 (d, *J* = 6.2 Hz, 2H), 2.44 (s, 3H), 1.73–1.69 (m, 1H), 0.98–0.95 (m, 2H), 0.72–0.69 (m, 2H).

Data match with those described in the literature.<sup>4</sup>

**Compound 7m** 4-Methyl-*N*-(2-(2-oxocyclopentyl)ethyl)-*N*-(propa-1,2-dien-1-yl)benzenesulfonamide

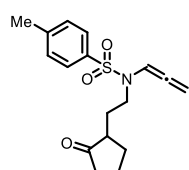

Chemical formula: C<sub>17</sub>H<sub>21</sub>NO<sub>3</sub>S

Molecular weight: 319.42 g.mol<sup>-1</sup>

Yellow liquid

**<sup>1</sup>H NMR (500 MHz, CDCl<sub>3</sub>)** δ 7.68–7.66 (m, 2H), 7.32–7.29 (m, 2H), 6.77 (t, *J* = 6.5 Hz, 1H), 5.33–5.26 (m, 2H), 3.27–3.12 (m, 2H), 2.42 (s, 3H), 2.40–2.27 (m, 2H), 2.17–1.97 (m, 4H), 1.84–1.74 (m, 1H), 1.53–1.36 (m, 2H).

**<sup>13</sup>C NMR (126 MHz, CDCl<sub>3</sub>)** δ 220.8, 201.7, 143.9, 135.2, 129.9, 127.3, 99.9, 87.8, 46.9, 38.0, 29.9, 28.0, 21.7, 20.8.

**IR (neat):** ν = 2961, 1733, 1351, 1162, 1093, 664, 590, 545 cm<sup>-1</sup>.

**ESI-HRMS (ESI-TOF):** m/z calcd for C<sub>17</sub>H<sub>21</sub>NNaO<sub>3</sub>S<sup>+</sup> [M+Na]<sup>+</sup>: 342.1134, found 342.1137.

**Compound 7n** *N*-(2-(1,3-dioxolan-2-yl)ethyl)-4-methyl-*N*-(propa-1,2-dien-1-yl)benzenesulfonamide

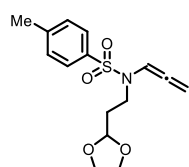

Chemical formula: C<sub>15</sub>H<sub>19</sub>NO<sub>4</sub>S

Molecular weight: 309.38 g.mol<sup>-1</sup>

**<sup>1</sup>H NMR (300 MHz, CDCl<sub>3</sub>)** δ = 7.69 (d, *J* = 8.3 Hz, 2H), 7.30 (d, *J* = 8.1 Hz, 2H), 6.83 (t, *J* = 6.2 Hz, 1H), 5.32 (d, *J* = 6.2 Hz, 2H), 4.90 (t, *J* = 4.7 Hz, 1H), 3.95–3.92 (m, 2H), 3.85–3.82 (m, 2H), 3.27–3.24 (m, 2H), 2.42 (s, 3H), 1.92–1.88 (m, 2H).

Data match with those described in the literature.<sup>4</sup>

**Compound 7o** *N*-(2-(1,3-dioxo-1,3,3a,4,7,7a-hexahydro-2*H*-isoindol-2-yl)ethyl)-4-methyl-*N*-(propa-1,2-dien-1-yl)benzenesulfonamide

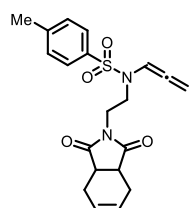

Chemical formula: C<sub>20</sub>H<sub>22</sub>N<sub>2</sub>O<sub>4</sub>S

Molecular weight: 386.47 g.mol<sup>-1</sup>

**<sup>1</sup>H NMR (300 MHz, CDCl<sub>3</sub>)** δ = 7.63 (d, *J* = 7.9 Hz, 2H), 7.29 (d, *J* = 7.7 Hz, 2H), 6.81 (t, *J* = 5.9 Hz, 1H), 5.91–5.89 (m, 2H), 5.39 (d, *J* = 6.1 Hz, 2H), 3.60–3.59 (m, 2H), 3.27–3.24 (m, 2H), 3.18–3.15 (m, 2H), 2.60–2.57 (m, 2H), 2.41 (s, 3H), 2.28–2.26 (m, 2H).

Data match with those described in the literature.<sup>4</sup>

**Compound 7p** *N*-benzyl-2,4,6-triisopropyl-*N*-(propa-1,2-dien-1-yl)benzenesulfonamide

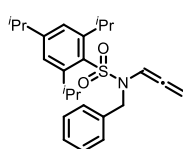

Chemical formula: C<sub>25</sub>H<sub>33</sub>NO<sub>2</sub>S  
Molecular weight: 411.60 g.mol<sup>-1</sup>

**<sup>1</sup>H NMR (400 MHz, CDCl<sub>3</sub>)** δ 7.28–7.22 (m, 5H), 7.19 (s, 2H), 6.68 (t, *J* = 6.2 Hz, 1H), 5.15 (d, *J* = 6.2 Hz, 2H), 4.47 (s, 2H), 4.19–4.13 (m, 2H), 2.95–2.88 (m, 1H), 1.27 (t, *J* = 7.0 Hz, 18H).

Data match with those described in the literature.<sup>8</sup>

**Compound 7q** *N*-benzyl-*N*-(propa-1,2-dien-1-yl)thiophene-2-sulfonamide

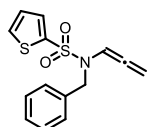

Chemical formula: C<sub>14</sub>H<sub>13</sub>NO<sub>2</sub>S<sub>2</sub>  
Molecular weight: 291.38 g.mol<sup>-1</sup>  
Yellow liquid

**<sup>1</sup>H NMR (500 MHz, CDCl<sub>3</sub>)** δ 7.55 (dd, *J* = 5.5 Hz, *J* = 1.5 Hz, 1H), 7.52 (dd, *J* = 3.5 Hz, *J* = 1.0 Hz, 1H), 7.25–7.18 (m, 5H), 7.06–7.04 (m, 1H), 6.71–6.68 (m, 1H), 5.12 (d, *J* = 6.0 Hz, 2H), 4.29 (s, 2H).

**<sup>13</sup>C NMR (126 MHz, CDCl<sub>3</sub>)** δ 202.6, 138.4, 136.0, 132.5, 132.4, 128.5, 128.1, 127.7, 127.6, 99.7, 88.3, 50.4.

**IR (neat):** ν = 3093, 1358, 1160, 603, 570 cm<sup>-1</sup>.

**ESI-HRMS (ESI-TOF):** *m/z* calcd for C<sub>14</sub>H<sub>14</sub>NO<sub>2</sub>S<sub>2</sub><sup>+</sup> [M+H]<sup>+</sup>: 292.0460, found 292.0447.

**Compound 7t** *N*-benzyl-*N*-(buta-1,2-dien-1-yl)-4-methylbenzenesulfonamide

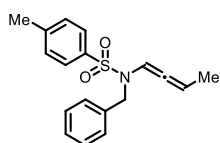

Chemical formula: C<sub>18</sub>H<sub>19</sub>NO<sub>2</sub>S  
Molecular weight: 313.42 g.mol<sup>-1</sup>  
Yellow liquid

**<sup>1</sup>H NMR (500 MHz, CDCl<sub>3</sub>)** δ 7.73–7.70 (m, 2H), 7.33–7.30 (m, 2H), 7.29–7.19 (m, 5H), 6.72–6.69 (m, 1H), 5.48–5.43 (m, 1H), 4.46 (d, *J* = 15.0 Hz, 1H), 4.08 (d, *J* = 15.0 Hz, 1H), 2.43 (s, 3H), 1.32–1.30 (m, 3H).

**<sup>13</sup>C NMR (126 MHz, CDCl<sub>3</sub>)** δ 197.3, 143.8, 136.4, 135.6, 129.8, 128.4, 127.9, 127.4, 127.4, 99.3, 99.1, 50.2, 21.7, 15.8.

**IR (neat):** ν = 3087, 2897, 1349, 1164, 1091, 664, 588 cm<sup>-1</sup>.

**ESI-HRMS (ESI-TOF):** *m/z* calcd for C<sub>18</sub>H<sub>19</sub>NNaO<sub>2</sub>S<sup>+</sup> [M+Na]<sup>+</sup>: 336.1025, found 336.1039.

**Compound 7u** *N*-benzyl-4-methyl-*N*-(3-phenylpropa-1,2-dien-1-yl)benzenesulfonamide

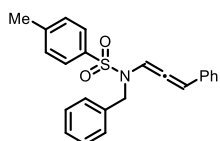

Chemical formula: C<sub>23</sub>H<sub>21</sub>NO<sub>2</sub>S  
Molecular weight: 375.49 g.mol<sup>-1</sup>  
Yellow liquid

Data match with those described in the literature.<sup>11</sup>

**Compound 8a** (*E*)-(3-(benzylamino)-2-tosylallyl)diphenylphosphine oxide

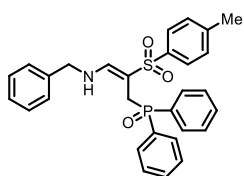

Chemical formula: C<sub>29</sub>H<sub>28</sub>NO<sub>3</sub>PS  
Molecular weight: 501.58 g.mol<sup>-1</sup>  
White solid  
Melting point: 72–74 °C  
Yield: 81%

**<sup>1</sup>H NMR (500 MHz, CDCl<sub>3</sub>)** δ 8.64–8.59 (m, 1H), 7.62–7.58 (m, 4H), 7.47–7.39 (m, 5H), 7.33–7.29 (m, 4H), 7.23–7.16 (m, 3H), 7.11–7.06 (m, 4H), 4.27 (d, *J* = 6.0 Hz, 2H), 3.16 (d, *J* = 13.5 Hz, 2H), 2.28 (s, 3H).

**<sup>13</sup>C NMR (126 MHz, CDCl<sub>3</sub>)** δ 149.9 (d, *J*<sub>C-P</sub> = 2.9 Hz), 142.4, 140.2, 138.6, 132.2 (d, *J*<sub>C-P</sub> = 2.8 Hz), 131.0 (d, *J*<sub>C-P</sub> = 100.3 Hz), 130.9 (d, *J*<sub>C-P</sub> = 9.6 Hz), 129.6, 128.7 (d, *J*<sub>C-P</sub> = 12.1 Hz), 128.7, 127.5, 127.2, 126.6, 94.0 (d, *J*<sub>C-P</sub> = 4.4 Hz), 52.8, 29.2 (d, *J*<sub>C-P</sub> = 68.3 Hz), 21.5.  
**<sup>31</sup>P NMR (121 MHz, CDCl<sub>3</sub>)** δ 35.01 (s, 1P).  
**IR (neat):** ν = 3060, 1647, 1283, 1136, 737, 659 cm<sup>-1</sup>.  
**ESI-HRMS (ESI-TOF):** m/z calcd for C<sub>29</sub>H<sub>28</sub>KNO<sub>3</sub>PS<sup>+</sup> [M+K]<sup>+</sup>: 540.1159, found 540.1120.

**Compound 8b** (*E*)-(3-((4-methoxybenzyl)amino)-2-tosylallyl)diphenylphosphine oxide

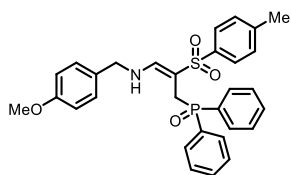

Chemical formula: C<sub>30</sub>H<sub>30</sub>NO<sub>4</sub>PS  
 Molecular weight: 531.61 g.mol<sup>-1</sup>  
 White solid  
 Melting point: 78–80 °C  
 Yield: 83%

**<sup>1</sup>H NMR (500 MHz, CDCl<sub>3</sub>)** δ 8.64–8.59 (m, 1H), 7.69–7.64 (m, 4H), 7.55–7.46 (m, 5H), 7.40–7.36 (m, 4H), 7.15–7.10 (m, 4H), 6.84–6.81 (m, 2H), 4.29 (d, *J* = 6.0 Hz, 2H), 3.79 (s, 3H), 3.22 (d, *J* = 14.0 Hz, 2H), 2.35 (s, 3H).  
**<sup>13</sup>C NMR (126 MHz, CDCl<sub>3</sub>)** δ 159.0, 149.7 (d, *J*<sub>C-P</sub> = 2.8 Hz), 142.3, 140.2, 132.1 (d, *J*<sub>C-P</sub> = 2.8 Hz), 130.9 (d, *J*<sub>C-P</sub> = 9.6 Hz), 130.6, 130.4 (d, *J*<sub>C-P</sub> = 100.3 Hz), 129.6, 128.7 (d, *J*<sub>C-P</sub> = 12.1 Hz), 128.6, 126.6, 114.1, 93.7 (d, *J*<sub>C-P</sub> = 4.3 Hz), 55.3, 52.3, 29.2 (d, *J*<sub>C-P</sub> = 68.3 Hz), 21.5.  
**<sup>31</sup>P NMR (121 MHz, CDCl<sub>3</sub>)** δ 34.96 (s, 1P).  
**IR (neat):** ν = 3059, 1643, 1512, 1135, 735, 658, 515 cm<sup>-1</sup>.  
**ESI-HRMS (ESI-TOF):** m/z calcd for C<sub>30</sub>H<sub>30</sub>NNaO<sub>4</sub>PS<sup>+</sup> [M+Na]<sup>+</sup>: 554.1525, found 554.1533.

**Compound 8c** (*E*)-diphenyl(2-tosyl-3-((4-(trifluoromethyl)benzyl)amino)allyl)phosphine oxide

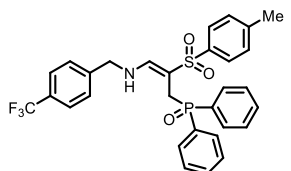

Chemical formula: C<sub>30</sub>H<sub>27</sub>F<sub>3</sub>NO<sub>3</sub>PS  
 Molecular weight: 569.58 g.mol<sup>-1</sup>  
 White solid  
 Melting point: 70–72 °C  
 Yield: 78%

**<sup>1</sup>H NMR (500 MHz, CDCl<sub>3</sub>)** δ 8.80–8.75 (m, 1H), 7.70–7.65 (m, 4H), 7.56–7.49 (m, 7H), 7.43–7.39 (m, 4H), 7.28–7.26 (m, 2H), 7.19–7.17 (m, 2H), 4.41 (d, *J* = 6.0 Hz, 2H), 3.23 (d, *J* = 14.0 Hz, 2H), 2.38 (s, 3H).  
**<sup>13</sup>C NMR (126 MHz, CDCl<sub>3</sub>)** δ 149.6 (d, *J*<sub>C-P</sub> = 3.0 Hz), 142.8, 142.7, 140.0, 132.4 (d, *J*<sub>C-P</sub> = 2.9 Hz), 131.0 (d, *J*<sub>C-P</sub> = 9.7 Hz), 130.9 (d, *J*<sub>C-P</sub> = 100.5 Hz), 129.7, 128.9 (d, *J*<sub>C-P</sub> = 12.1 Hz), 127.5, 126.8, 125.7 (q, *J*<sub>C-F</sub> = 3.8 Hz), 124.2 (q, *J*<sub>C-F</sub> = 272.5 Hz), 95.2 (d, *J*<sub>C-P</sub> = 4.5 Hz), 52.4, 29.2 (d, *J*<sub>C-P</sub> = 67.8 Hz), 21.6.  
**<sup>19</sup>F NMR (471 MHz, CDCl<sub>3</sub>)** δ -62.47 (s, 3F).  
**<sup>31</sup>P NMR (202 MHz, CDCl<sub>3</sub>)** δ 35.43 (s, 1P).  
**IR (neat):** ν = 2925, 1648, 1325, 1067, 738, 660, 543 cm<sup>-1</sup>.  
**ESI-HRMS (ESI-TOF):** m/z calcd for C<sub>30</sub>H<sub>27</sub>F<sub>3</sub>NNaO<sub>3</sub>PS<sup>+</sup> [M+Na]<sup>+</sup>: 592.1294, found 592.1287.

**Compound 8d** (*E*)-(3-((4-chlorobenzyl)amino)-2-tosylallyl)diphenylphosphine oxide

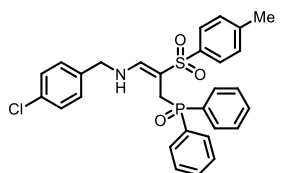

Chemical formula: C<sub>29</sub>H<sub>27</sub>ClNO<sub>3</sub>PS  
 Molecular weight: 536.02 g.mol<sup>-1</sup>  
 White solid  
 Melting point: 70–72 °C  
 Yield: 86%

**<sup>1</sup>H NMR (500 MHz, CDCl<sub>3</sub>)** δ 8.72–8.67 (m, 1H), 7.69–7.65 (m, 4H), 7.55–7.48 (m, 5H), 7.42–7.38 (m, 4H), 7.25–7.23 (m, 2H), 7.18–7.16 (m, 2H), 7.10–7.08 (m, 2H), 4.31 (d, *J* = 5.5 Hz, 2H), 3.22 (d, *J* = 14.0 Hz, 2H), 2.37 (s, 3H).  
**<sup>13</sup>C NMR (126 MHz, CDCl<sub>3</sub>)** δ 149.6 (d, *J*<sub>C-P</sub> = 3.0 Hz), 142.5, 140.0, 137.2, 133.3, 132.3 (d, *J*<sub>C-P</sub> = 2.8 Hz), 130.9 (d, *J*<sub>C-P</sub> = 9.7 Hz), 130.9 (d, *J*<sub>C-P</sub> = 100.5 Hz), 129.7, 128.9, 128.8 (d, *J*<sub>C-P</sub> = 12.1 Hz), 128.6, 126.7, 94.7 (d, *J*<sub>C-P</sub> = 5.8 Hz), 52.2, 29.2 (d, *J*<sub>C-P</sub> = 67.9 Hz), 21.5.  
**<sup>31</sup>P NMR (121 MHz, CDCl<sub>3</sub>)** δ 35.12 (s, 1P).  
**IR (neat):** ν = 3060, 1647, 1137, 659, 514 cm<sup>-1</sup>.  
**ESI-HRMS (ESI-TOF):** m/z calcd for C<sub>29</sub>H<sub>27</sub>ClNNaO<sub>3</sub>PS<sup>+</sup> [M+Na]<sup>+</sup>: 558.1030, found 558.1020.

**Compound 8e** (*E*)-(3-((benzo[*d*][1,3]dioxol-5-ylmethyl)amino)-2-tosylallyl)diphenylphosphine oxide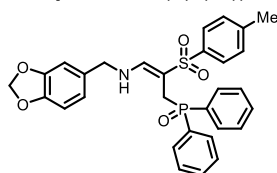

Chemical formula: C<sub>30</sub>H<sub>28</sub>NO<sub>5</sub>PS  
 Molecular weight: 545.59 g.mol<sup>-1</sup>  
 White solid  
 Melting point: 83–85 °C  
 Yield: 57%

<sup>1</sup>H NMR (300 MHz, CDCl<sub>3</sub>) δ 8.66–8.57 (m, 1H), 7.72–7.65 (m, 4H), 7.56–7.37 (m, 9H), 7.18–7.15 (m, 2H), 6.73–6.62 (m, 3H), 5.95 (s, 2H), 4.25 (d, *J* = 5.4 Hz, 2H), 3.22 (d, *J* = 13.5 Hz, 2H), 2.37 (s, 3H).

<sup>13</sup>C NMR (126 MHz, CDCl<sub>3</sub>) δ 149.7 (d, *J*<sub>C-P</sub> = 2.9 Hz), 148.0, 147.1, 142.4, 140.2, 132.5, 132.3 (d, *J*<sub>C-P</sub> = 2.9 Hz), 131.0 (d, *J*<sub>C-P</sub> = 9.7 Hz), 131.0 (d, *J*<sub>C-P</sub> = 100.4 Hz), 129.7, 128.8 (d, *J*<sub>C-P</sub> = 12.1 Hz), 126.7, 120.7, 108.4, 107.9, 101.2, 94.1 (d, *J*<sub>C-P</sub> = 4.4 Hz), 52.7, 29.3 (d, *J*<sub>C-P</sub> = 68.2 Hz), 21.6.

<sup>31</sup>P NMR (121 MHz, CDCl<sub>3</sub>) δ 35.00 (s, 1P).

IR (neat): ν = 3055, 1641, 1437, 1195, 658, 537 cm<sup>-1</sup>.

ESI-HRMS (ESI-TOF): *m/z* calcd for C<sub>30</sub>H<sub>28</sub>KNO<sub>5</sub>PS<sup>+</sup> [M+K]<sup>+</sup>: 584.1057, found 584.1060.

**Compound 8f** (*E*)-diphenyl(3-((thiophen-2-ylmethyl)amino)-2-tosylallyl)phosphine oxide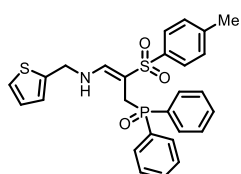

Chemical formula: C<sub>27</sub>H<sub>26</sub>NO<sub>3</sub>PS<sub>2</sub>  
 Molecular weight: 507.60 g.mol<sup>-1</sup>  
 White solid  
 Melting point: 85–87 °C  
 Yield: 62%

<sup>1</sup>H NMR (500 MHz, CDCl<sub>3</sub>) δ 8.76–8.72 (m, 1H), 7.69–7.65 (m, 4H), 7.56–7.48 (m, 5H), 7.42–7.38 (m, 4H), 7.23 (dd, *J* = 5.0 Hz, *J* = 1.0 Hz, 1H), 7.16–7.14 (m, 2H), 6.95–6.93 (m, 1H), 6.91–6.90 (m, 1H), 4.52 (d, *J* = 5.5 Hz, 2H), 3.21 (d, *J* = 13.5 Hz, 2H), 2.37 (s, 3H).

<sup>13</sup>C NMR (126 MHz, CDCl<sub>3</sub>) δ 149.3 (d, *J*<sub>C-P</sub> = 2.9 Hz), 142.5, 141.8, 140.0, 132.2 (d, *J*<sub>C-P</sub> = 2.8 Hz), 131.0 (d, *J*<sub>C-P</sub> = 9.6 Hz), 130.9 (d, *J*<sub>C-P</sub> = 100.4 Hz), 129.7, 128.8 (d, *J*<sub>C-P</sub> = 12.1 Hz), 127.2, 126.8, 125.7, 125.3, 95.0 (d, *J*<sub>C-P</sub> = 4.5 Hz), 47.5, 29.2 (d, *J*<sub>C-P</sub> = 68.2 Hz), 21.6.

<sup>31</sup>P NMR (121 MHz, CDCl<sub>3</sub>) δ 35.01 (s, 1P).

IR (neat): ν = 3072, 1645, 1284, 1136, 737, 659, 541 cm<sup>-1</sup>.

ESI-HRMS (ESI-TOF): *m/z* calcd for C<sub>27</sub>H<sub>26</sub>NNaO<sub>3</sub>PS<sub>2</sub><sup>+</sup> [M+Na]<sup>+</sup>: 530.0984, found 530.0983.

**Compound 8g** (*E*)-diphenyl(3-(phenylamino)-2-tosylallyl)phosphine oxide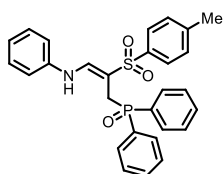

Chemical formula: C<sub>28</sub>H<sub>26</sub>NO<sub>3</sub>PS  
 Molecular weight: 487.55 g.mol<sup>-1</sup>  
 White solid  
 Melting point: 73–75 °C  
 Yield: 70%

<sup>1</sup>H NMR (500 MHz, CDCl<sub>3</sub>) δ 10.78 (d, *J* = 13.0 Hz, 1H), 8.09 (dd, *J* = 13.0 Hz, *J* = 2.5 Hz, 1H), 7.75–7.70 (m, 4H), 7.60–7.58 (m, 2H), 7.53–7.49 (m, 2H), 7.44–7.40 (m, 4H), 7.33–7.29 (m, 2H), 7.18–7.15 (m, 2H), 7.12–7.09 (m, 2H), 7.03–7.00 (m, 1H), 3.36 (d, *J* = 13.5 Hz, 2H), 2.38 (s, 3H).

<sup>13</sup>C NMR (126 MHz, CDCl<sub>3</sub>) δ 142.9, 141.4 (d, *J*<sub>C-P</sub> = 3.3 Hz), 141.2, 139.4, 132.4 (d, *J*<sub>C-P</sub> = 2.9 Hz), 131.0 (d, *J*<sub>C-P</sub> = 9.7 Hz), 130.6 (d, *J*<sub>C-P</sub> = 101.0 Hz), 129.8, 129.7, 128.9 (d, *J*<sub>C-P</sub> = 12.2 Hz), 126.9, 122.8, 115.9, 100.2 (d, *J*<sub>C-P</sub> = 5.3 Hz), 29.4 (d, *J*<sub>C-P</sub> = 67.5 Hz), 21.6.

<sup>31</sup>P NMR (202 MHz, CDCl<sub>3</sub>) δ 35.78 (s, 1P).

IR (neat): ν = 2926, 1655, 1591, 1498, 1286, 1137, 1085, 735, 659, 527 cm<sup>-1</sup>.

ESI-HRMS (ESI-TOF): *m/z* calcd for C<sub>28</sub>H<sub>27</sub>NO<sub>3</sub>PS<sup>+</sup> [M+H]<sup>+</sup>: 488.1444, found 488.1413.

**Compound 8h** (*E*)-(3-((4-methoxyphenyl)amino)-2-tosylallyl)diphenylphosphine oxide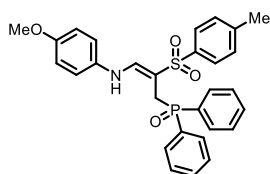

Chemical formula: C<sub>29</sub>H<sub>28</sub>NO<sub>4</sub>PS  
 Molecular weight: 517.58 g.mol<sup>-1</sup>  
 White solid  
 Melting point: 75–77 °C  
 Yield: 80%

<sup>1</sup>H NMR (500 MHz, CDCl<sub>3</sub>) δ 10.65 (d, *J* = 13.5 Hz, 1H), 8.00 (dd, *J* = 13.0 Hz, *J* = 2.5 Hz, 1H), 7.74–7.70 (m, 4H), 7.59–7.57 (m, 2H), 7.52–7.48 (m, 2H), 7.43–7.39 (m, 4H), 7.16–7.14 (m, 2H), 7.04–7.03 (m, 2H), 6.87–6.84 (m, 2H), 3.77 (s, 3H), 3.36 (d, *J* = 13.5 Hz, 2H), 2.36 (s, 3H).

**<sup>13</sup>C NMR (126 MHz, CDCl<sub>3</sub>)** δ 155.7, 142.7, 142.2 (d, *J*<sub>C-P</sub> = 3.0 Hz), 139.6, 134.8, 132.3 (d, *J*<sub>C-P</sub> = 2.9 Hz), 130.9 (d, *J*<sub>C-P</sub> = 9.7 Hz), 130.6 (d, *J*<sub>C-P</sub> = 101.3 Hz), 129.7, 128.8 (d, *J*<sub>C-P</sub> = 12.1 Hz), 126.8, 117.3, 114.9, 98.6 (d, *J*<sub>C-P</sub> = 5.3 Hz), 55.6, 29.4 (d, *J*<sub>C-P</sub> = 67.8 Hz), 21.5.

**<sup>31</sup>P NMR (121 MHz, CDCl<sub>3</sub>)** δ 35.62 (s, 1P).

**IR (neat):** ν = 2933, 1652, 1508, 1287, 1245, 1136, 1084, 733, 585 cm<sup>-1</sup>.

**ESI-HRMS (ESI-TOF):** m/z calcd for C<sub>29</sub>H<sub>28</sub>NNaO<sub>4</sub>PS<sup>+</sup> [M+Na]<sup>+</sup>: 540.1369, found 540.1356.

**Compound 8i** (*E*)-3-((3-methoxyphenyl)amino)-2-tosylallyl)diphenylphosphine oxide

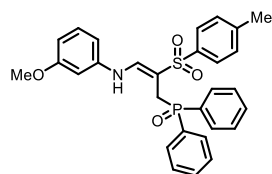

Chemical formula: C<sub>29</sub>H<sub>28</sub>NO<sub>4</sub>PS

Molecular weight: 517.58 g.mol<sup>-1</sup>

White solid

Melting point: 96–98 °C

Yield: 73%

**<sup>1</sup>H NMR (500 MHz, CDCl<sub>3</sub>)** δ 10.76 (d, *J* = 13.0 Hz, 1H), 8.06 (dd, *J* = 12.5 Hz, *J* = 2.0 Hz, 1H), 7.74–7.69 (m, 4H), 7.59–7.57 (m, 2H), 7.53–7.50 (m, 2H), 7.44–7.40 (m, 4H), 7.20 (t, *J* = 8.0 Hz, 1H), 7.17 (d, *J* = 8.0 Hz, 2H), 6.71 (dd, *J* = 8.0 Hz, *J* = 2.0 Hz, 1H), 6.63 (t, *J* = 2.5 Hz, 1H), 6.57 (dd, *J* = 8.5 Hz, *J* = 2.5 Hz, 1H), 3.81 (s, 3H), 3.36 (d, *J* = 13.5 Hz, 2H), 2.38 (s, 3H).

**<sup>13</sup>C NMR (126 MHz, CDCl<sub>3</sub>)** δ 161.0, 142.9, 142.5, 141.4 (d, *J*<sub>C-P</sub> = 3.4 Hz), 139.3, 132.5 (d, *J*<sub>C-P</sub> = 2.8 Hz), 131.0 (d, *J*<sub>C-P</sub> = 9.7 Hz), 130.5 (d, *J*<sub>C-P</sub> = 101.2 Hz), 130.5, 129.8, 128.9 (d, *J*<sub>C-P</sub> = 12.1 Hz), 127.0, 108.5, 108.4, 101.8, 100.4 (d, *J*<sub>C-P</sub> = 5.3 Hz), 55.5, 29.4 (d, *J*<sub>C-P</sub> = 67.5 Hz), 21.6.

**<sup>31</sup>P NMR (202 MHz, CDCl<sub>3</sub>)** δ 35.82 (s, 1P).

**IR (neat):** ν = 2933, 1658, 1594, 1286, 1137, 1084, 733, 659, 527 cm<sup>-1</sup>.

**ESI-HRMS (ESI-TOF):** m/z calcd for C<sub>29</sub>H<sub>28</sub>NNaO<sub>4</sub>PS<sup>+</sup> [M+Na]<sup>+</sup>: 540.1369, found 540.1379.

**Compound 8j** (*E*)-diphenyl(3-(*o*-tolylamino)-2-tosylallyl)phosphine oxide

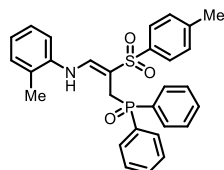

Chemical formula: C<sub>29</sub>H<sub>28</sub>NO<sub>3</sub>PS

Molecular weight: 501.58 g.mol<sup>-1</sup>

White solid

Melting point: 73–75 °C

Yield: 77%

**<sup>1</sup>H NMR (500 MHz, CDCl<sub>3</sub>)** δ 10.25 (d, *J* = 12.5 Hz, 1H), 8.07 (dd, *J* = 12.5 Hz, *J* = 2.5 Hz, 1H), 7.74–7.70 (m, 4H), 7.61–7.58 (m, 2H), 7.54–7.50 (m, 2H), 7.44–7.40 (m, 4H), 7.20–7.16 (m, 4H), 7.03–6.96 (m, 2H), 3.39 (d, *J* = 13.5 Hz, 2H), 2.48 (s, 3H), 2.39 (s, 3H).

**<sup>13</sup>C NMR (126 MHz, CDCl<sub>3</sub>)** δ 142.9 (d, *J*<sub>C-P</sub> = 3.3 Hz), 142.8, 140.3, 139.5, 132.4 (d, *J*<sub>C-P</sub> = 2.9 Hz), 131.2, 131.1 (d, *J*<sub>C-P</sub> = 9.6 Hz), 130.8 (d, *J*<sub>C-P</sub> = 100.7 Hz), 129.8, 128.8 (d, *J*<sub>C-P</sub> = 12.1 Hz), 127.6, 127.1, 127.0, 123.3, 115.8, 100.6 (d, *J*<sub>C-P</sub> = 5.4 Hz), 29.5 (d, *J*<sub>C-P</sub> = 68.2 Hz), 21.6, 18.5.

**<sup>31</sup>P NMR (202 MHz, CDCl<sub>3</sub>)** δ 35.36 (s, 1P).

**IR (neat):** ν = 2933, 1647, 1289, 1138, 1085, 737 cm<sup>-1</sup>.

**ESI-HRMS (ESI-TOF):** m/z calcd for C<sub>29</sub>H<sub>28</sub>NNaO<sub>3</sub>PS<sup>+</sup> [M+Na]<sup>+</sup>: 524.1420, found 524.1418.

**Compound 8k** (*E*)-3-(octylamino)-2-tosylallyl)diphenylphosphine oxide

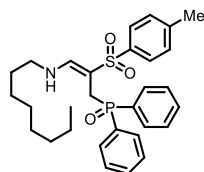

Chemical formula: C<sub>30</sub>H<sub>38</sub>NO<sub>3</sub>PS

Molecular weight: 523.67 g.mol<sup>-1</sup>

Colorless liquid

Yield: 47%

**<sup>1</sup>H NMR (500 MHz, CDCl<sub>3</sub>)** δ 8.23–8.18 (m, 1H), 7.73–7.68 (m, 4H), 7.55–7.53 (m, 2H), 7.50–7.46 (m, 2H), 7.44–7.38 (m, 5H), 7.14 (d, *J* = 8.0 Hz, 2H), 3.20 (d, *J* = 13.5 Hz, 2H), 3.15 (q, *J* = 7.0 Hz, 2H), 2.35 (s, 3H), 1.52–1.46 (m, 2H), 1.29–1.24 (m, 10H), 0.88 (t, *J* = 7.0 Hz, 3H).

**<sup>13</sup>C NMR (126 MHz, CDCl<sub>3</sub>)** δ 150.0 (d, *J*<sub>C-P</sub> = 2.6 Hz), 142.2, 140.5, 132.1 (d, *J*<sub>C-P</sub> = 2.9 Hz), 131.1 (d, *J*<sub>C-P</sub> = 100.0 Hz), 130.9 (d, *J*<sub>C-P</sub> = 9.7 Hz), 129.6, 128.7 (d, *J*<sub>C-P</sub> = 12.1 Hz), 126.5, 92.1 (d, *J*<sub>C-P</sub> = 4.2 Hz), 49.5, 31.9, 31.2, 29.3, 29.3, 29.2 (d, *J*<sub>C-P</sub> = 68.4 Hz), 26.6, 22.7, 21.5, 14.2.

**<sup>31</sup>P NMR (202 MHz, CDCl<sub>3</sub>)** δ 35.13 (s, 1P).

**IR (neat):** ν = 2926, 2855, 1645, 1283, 1136, 738, 657 cm<sup>-1</sup>.

**ESI-HRMS (ESI-TOF):** m/z calcd for C<sub>30</sub>H<sub>39</sub>NO<sub>3</sub>PS<sup>+</sup> [M+H]<sup>+</sup>: 524.2383, found 524.2382.

**Compound 8l** (*E*)-3-(cyclopropylamino)-2-tosylallyldiphenylphosphine oxide

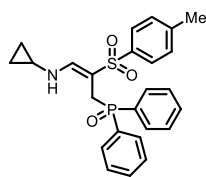

Chemical formula: C<sub>25</sub>H<sub>26</sub>NO<sub>3</sub>PS

Molecular weight: 451.52 g.mol<sup>-1</sup>

White solid

Melting point: 170–172 °C

Yield: 73%

**<sup>1</sup>H NMR (500 MHz, CDCl<sub>3</sub>)** δ 8.38–8.37 (m, 1H), 7.72–7.67 (m, 4H), 7.58–7.54 (m, 3H), 7.52–7.48 (m, 2H), 7.43–7.39 (m, 4H), 7.16 (d, *J* = 8.5 Hz, 2H), 3.17 (d, *J* = 13.5 Hz, 2H), 2.71–2.67 (m, 1H), 2.37 (s, 3H), 0.69–0.63 (m, 2H), 0.62–0.56 (m, 2H).

**<sup>13</sup>C NMR (126 MHz, CDCl<sub>3</sub>)** δ 150.1 (d, *J*<sub>C-P</sub> = 2.9 Hz), 142.4, 140.3, 132.2 (d, *J*<sub>C-P</sub> = 2.9 Hz), 131.1 (d, *J*<sub>C-P</sub> = 100.2 Hz), 130.9 (d, *J*<sub>C-P</sub> = 9.6 Hz), 129.7, 128.8 (d, *J*<sub>C-P</sub> = 12.1 Hz), 126.7, 94.3 (d, *J*<sub>C-P</sub> = 4.5 Hz), 29.2 (d, *J*<sub>C-P</sub> = 68.3 Hz), 29.2, 21.5, 6.9.

**<sup>31</sup>P NMR (202 MHz, CDCl<sub>3</sub>)** δ 35.03 (s, 1P).

**IR (neat):** ν = 3197, 3060, 1644, 1284, 1135, 1086, 737, 656, 584 cm<sup>-1</sup>.

**ESI-HRMS (ESI-TOF):** *m/z* calcd for C<sub>25</sub>H<sub>26</sub>NNaO<sub>3</sub>PS<sup>+</sup> [M+Na]<sup>+</sup>: 474.1263, found 474.1261.

**Compound 8m** (*E*)-2-(2-((3-(diphenylphosphoryl)-2-tosylprop-1-en-1-yl)amino)ethyl)cyclopentan-1-one

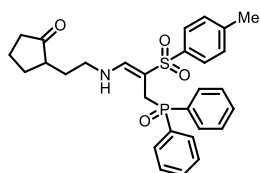

Chemical formula: C<sub>29</sub>H<sub>32</sub>NO<sub>4</sub>PS

Molecular weight: 521.61 g.mol<sup>-1</sup>

White solid

Melting point: 68–70 °C

Yield: 80%

**<sup>1</sup>H NMR (500 MHz, CDCl<sub>3</sub>)** δ 8.31–8.26 (m, 1H), 7.73–7.68 (m, 4H), 7.57–7.54 (m, 2H), 7.52–7.48 (m, 2H), 7.44–7.39 (m, 5H), 7.17–7.16 (m, 2H), 3.34–3.23 (m, 2H), 3.19 (d, *J* = 13.5 Hz, 2H), 2.37 (s, 3H), 2.33–2.16 (m, 2H), 2.13–1.94 (m, 4H), 1.77–1.68 (m, 1H), 1.49–1.41 (m, 2H).

**<sup>13</sup>C NMR (126 MHz, CDCl<sub>3</sub>)** δ 220.4, 149.8 (d, *J*<sub>C-P</sub> = 2.8 Hz), 142.4, 140.4, 132.3 (d, *J*<sub>C-P</sub> = 2.9 Hz), 131.2 (d, *J*<sub>C-P</sub> = 100.3 Hz), 131.0 (d, *J*<sub>C-P</sub> = 9.6 Hz), 129.7, 128.8 (d, *J*<sub>C-P</sub> = 12.0 Hz), 126.6, 93.2 (d, *J*<sub>C-P</sub> = 4.3 Hz), 47.6, 46.3, 38.0, 31.5, 29.9, 29.2 (d, *J*<sub>C-P</sub> = 68.3 Hz), 21.6, 20.9.

**<sup>31</sup>P NMR (202 MHz, CDCl<sub>3</sub>)** δ 35.23 (s, 1P).

**IR (neat):** ν = 2956, 1733, 1646, 1282, 1135, 738, 658 cm<sup>-1</sup>.

**ESI-HRMS (ESI-TOF):** *m/z* calcd for C<sub>29</sub>H<sub>32</sub>NNaO<sub>4</sub>PS<sup>+</sup> [M+Na]<sup>+</sup>: 544.1682, found 544.1680.

**Compound 8n** (*E*)-3-((2-(1,3-dioxolan-2-yl)ethyl)amino)-2-tosylallyldiphenylphosphine oxide

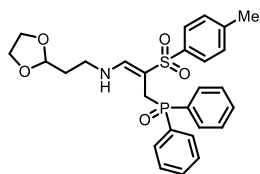

Chemical formula: C<sub>27</sub>H<sub>30</sub>NO<sub>5</sub>PS

Molecular weight: 511.57 g.mol<sup>-1</sup>

White solid

Melting point: 68–70 °C

Yield: 78%

**<sup>1</sup>H NMR (500 MHz, CDCl<sub>3</sub>)** δ 8.25–8.20 (m, 1H), 7.72–7.67 (m, 4H), 7.55–7.52 (m, 2H), 7.50–7.38 (m, 7H), 7.14–7.12 (m, 2H), 4.82 (t, *J* = 4.5 Hz, 1H), 3.96–3.90 (m, 2H), 3.83–3.76 (m, 2H), 3.33 (q, *J* = 6.5 Hz, 2H), 3.20 (d, *J* = 13.5 Hz, 2H), 2.34 (s, 3H), 1.91–1.87 (m, 2H).

**<sup>13</sup>C NMR (126 MHz, CDCl<sub>3</sub>)** δ 150.0 (d, *J*<sub>C-P</sub> = 2.8 Hz), 142.2, 140.4, 132.1 (d, *J*<sub>C-P</sub> = 2.8 Hz), 131.1 (d, *J*<sub>C-P</sub> = 99.9 Hz), 130.9 (d, *J*<sub>C-P</sub> = 9.5 Hz), 129.6, 128.7 (d, *J*<sub>C-P</sub> = 12.0 Hz), 126.5, 102.1, 92.9 (d, *J*<sub>C-P</sub> = 4.4 Hz), 65.0, 44.5, 35.2, 29.2 (d, *J*<sub>C-P</sub> = 68.4 Hz), 21.5.

**<sup>31</sup>P NMR (202 MHz, CDCl<sub>3</sub>)** δ 35.04 (s, 1P).

**IR (neat):** ν = 2959, 1645, 1282, 1135, 738, 657, 540 cm<sup>-1</sup>.

**ESI-HRMS (ESI-TOF):** *m/z* calcd for C<sub>27</sub>H<sub>30</sub>NNaO<sub>5</sub>PS<sup>+</sup> [M+Na]<sup>+</sup>: 534.1475, found 534.1484.

**Compound 8o** (*E*)-2-(2-((3-(diphenylphosphoryl)-2-tosylprop-1-en-1-yl)amino)ethyl)-3a,4,7,7a-tetrahydro-1*H*-isoindole-1,3(2*H*)-dione

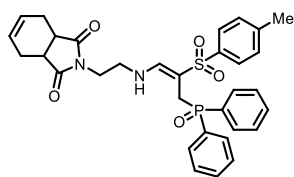

Chemical formula: C<sub>32</sub>H<sub>33</sub>N<sub>2</sub>O<sub>5</sub>PS

Molecular weight: 588.66 g.mol<sup>-1</sup>

White solid

Melting point: 80–82 °C

Yield: 82%

**<sup>1</sup>H NMR (500 MHz, CDCl<sub>3</sub>)** δ 8.36–8.31 (m, 1H), 7.65–7.61 (m, 4H), 7.50–7.44 (m, 4H), 7.39–7.35 (m, 4H), 7.31 (dd, *J* = 13.0 Hz, *J* = 2.0 Hz, 1H), 7.11–7.09 (m, 2H), 5.85–5.83 (m, 2H), 3.61 (t, *J* = 6.0 Hz, 2H), 3.38 (q, *J* = 6.0 Hz, 2H), 3.19 (d, *J* = 13.5 Hz, 2H), 3.09–3.07 (m, 2H), 2.55–2.51 (m, 2H), 2.34 (s, 3H), 2.18–2.14 (m, 2H).

**<sup>13</sup>C NMR (126 MHz, CDCl<sub>3</sub>)** δ 180.2, 149.9 (d, *J*<sub>C-P</sub> = 2.8 Hz), 142.3, 140.1, 132.1 (d, *J*<sub>C-P</sub> = 2.8 Hz), 131.1 (d, *J*<sub>C-P</sub> = 100.0 Hz), 130.9 (d, *J*<sub>C-P</sub> = 9.6 Hz), 129.6, 128.7 (d, *J*<sub>C-P</sub> = 12.0 Hz), 127.9, 126.5, 94.7 (d, *J*<sub>C-P</sub> = 4.8 Hz), 46.0, 39.7, 39.1, 29.1 (d, *J*<sub>C-P</sub> = 68.8 Hz), 23.5, 21.5.

**<sup>31</sup>P NMR (202 MHz, CDCl<sub>3</sub>)** δ 35.06 (s, 1P).

**IR (neat):** ν = 2948, 1698, 1644, 1136, 735, 657 cm<sup>-1</sup>.

**ESI-HRMS (ESI-TOF):** *m/z* calcd for C<sub>32</sub>H<sub>33</sub>N<sub>2</sub>NaO<sub>5</sub>PS<sup>+</sup> [*M*+Na]<sup>+</sup>: 611.1740, found 611.1737.

**Compound 8p** (*E*)-(3-(benzylamino)-2-((2,4,6-triisopropylphenyl)sulfonyl)allyl)diphenylphosphine oxide

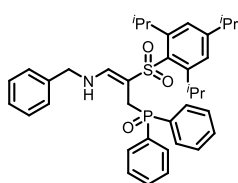

Chemical formula: C<sub>37</sub>H<sub>44</sub>NO<sub>3</sub>PS

Molecular weight: 613.80 g.mol<sup>-1</sup>

White solid

Melting point: 71–73 °C

Yield: 83%

**<sup>1</sup>H NMR (500 MHz, CDCl<sub>3</sub>)** δ 8.53–8.48 (m, 1H), 7.71–7.67 (m, 4H), 7.52–7.48 (m, 2H), 7.42–7.38 (m, 4H), 7.25–7.22 (m, 4H), 7.13–7.11 (m, 2H), 7.07 (s, 2H), 4.28 (d, *J* = 6.0 Hz, 2H), 4.06 (q, *J* = 6.5 Hz, 2H), 3.29 (d, *J* = 13.5 Hz, 2H), 2.88 (q, *J* = 7.0 Hz, 1H), 1.25 (d, *J* = 7.0 Hz, 6H), 1.08 (d, *J* = 7.0 Hz, 12H).

**<sup>13</sup>C NMR (126 MHz, CDCl<sub>3</sub>)** δ 152.6, 150.9, 147.1 (d, *J*<sub>C-P</sub> = 3.2 Hz), 139.0, 133.6, 132.3 (d, *J*<sub>C-P</sub> = 2.8 Hz), 131.3 (d, *J*<sub>C-P</sub> = 100.4 Hz), 131.0 (d, *J*<sub>C-P</sub> = 9.6 Hz), 128.8 (d, *J*<sub>C-P</sub> = 12.1 Hz), 128.7, 127.5, 127.3, 124.1, 97.9 (d, *J*<sub>C-P</sub> = 4.7 Hz), 52.5, 34.2, 29.4, 28.6 (d, *J*<sub>C-P</sub> = 68.2 Hz), 25.0, 23.8.

**<sup>31</sup>P NMR (121 MHz, CDCl<sub>3</sub>)** δ 34.43 (s, 1P).

**IR (neat):** ν = 2957, 1651, 1284, 1129, 737, 695, 582 cm<sup>-1</sup>.

**ESI-HRMS (ESI-TOF):** *m/z* calcd for C<sub>37</sub>H<sub>44</sub>NNaO<sub>3</sub>PS<sup>+</sup> [*M*+Na]<sup>+</sup>: 636.2672, found 636.2663.

**Compound 8q** (*E*)-(3-(benzylamino)-2-(thiophen-2-ylsulfonyl)allyl)diphenylphosphine oxide

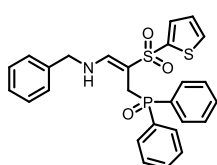

Chemical formula: C<sub>26</sub>H<sub>24</sub>NO<sub>3</sub>PS<sub>2</sub>

Molecular weight: 493.58 g.mol<sup>-1</sup>

White solid

Melting point: 180–182 °C

Yield: 86%

**<sup>1</sup>H NMR (500 MHz, CDCl<sub>3</sub>)** δ 8.76–8.71 (m, 1H), 7.65–7.61 (m, 4H), 7.50–7.42 (m, 3H), 7.37–7.32 (m, 5H), 7.28 (dd, *J* = 4.0 Hz, *J* = 1.5 Hz, 1H), 7.24–7.17 (m, 3H), 7.12–7.10 (m, 2H), 6.86 (dd, *J* = 5.0 Hz, *J* = 3.5 Hz, 1H), 4.29 (d, *J* = 6.0 Hz, 2H), 3.25 (d, *J* = 13.5 Hz, 2H).

**<sup>13</sup>C NMR (126 MHz, CDCl<sub>3</sub>)** δ 150.2 (d, *J*<sub>C-P</sub> = 2.6 Hz), 145.7, 138.4, 132.3 (d, *J*<sub>C-P</sub> = 2.8 Hz), 131.3, 131.0 (d, *J*<sub>C-P</sub> = 9.6 Hz), 130.9 (d, *J*<sub>C-P</sub> = 100.5 Hz), 130.8, 128.8 (d, *J*<sub>C-P</sub> = 12.0 Hz), 128.8, 127.6, 127.4, 127.3, 94.7 (d, *J*<sub>C-P</sub> = 4.0 Hz), 53.0, 29.3 (d, *J*<sub>C-P</sub> = 68.2 Hz).

**<sup>31</sup>P NMR (121 MHz, CDCl<sub>3</sub>)** δ 35.09 (s, 1P).

**IR (neat):** ν = 3058, 1644, 1282, 1197, 1127, 1011, 692, 550 cm<sup>-1</sup>.

**ESI-HRMS (ESI-TOF):** *m/z* calcd for C<sub>26</sub>H<sub>24</sub>NNaO<sub>3</sub>PS<sub>2</sub><sup>+</sup> [*M*+Na]<sup>+</sup>: 516.0827, found 516.0825.



**Compound 8r** (*E*)-(3-(benzylamino)-2-tosylallyl)bis(4-(*tert*-butyl)phenyl)phosphine oxide

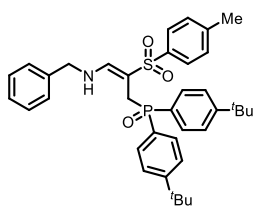

Chemical formula: C<sub>37</sub>H<sub>44</sub>NO<sub>3</sub>PS

Molecular weight: 613.80 g.mol<sup>-1</sup>

White solid

Melting point: 88–90 °C

Yield: 88%

**<sup>1</sup>H NMR (500 MHz, CDCl<sub>3</sub>)** δ 8.79–8.74 (m, 1H), 7.57–7.50 (m, 6H), 7.42 (dd, *J* = 13.5 Hz, *J* = 2.0 Hz, 1H), 7.35–7.33 (m, 4H), 7.20–7.15 (m, 3H), 7.13–7.10 (m, 2H), 7.08–7.06 (m, 2H), 4.27 (d, *J* = 5.5 Hz, 2H), 3.10 (d, *J* = 14.0 Hz, 2H), 2.30 (s, 3H), 1.23 (s, 18H).

**<sup>13</sup>C NMR (126 MHz, CDCl<sub>3</sub>)** δ 155.5 (d, *J*<sub>C-P</sub> = 2.9 Hz), 149.8 (d, *J*<sub>C-P</sub> = 2.9 Hz), 142.3, 140.3, 138.7, 130.8 (d, *J*<sub>C-P</sub> = 9.9 Hz), 129.6, 128.7, 128.0 (d, *J*<sub>C-P</sub> = 101.8 Hz), 127.4, 127.2, 126.8, 125.8 (d, *J*<sub>C-P</sub> = 12.3 Hz), 94.1 (d, *J*<sub>C-P</sub> = 4.2 Hz), 52.8, 35.1, 31.2, 29.4 (d, *J*<sub>C-P</sub> = 67.8 Hz), 21.6.

**<sup>31</sup>P NMR (121 MHz, CDCl<sub>3</sub>)** δ 34.80 (s, 1P).

**IR (neat):** ν = 2963, 1649, 1093, 611 cm<sup>-1</sup>.

**ESI-HRMS (ESI-TOF):** *m/z* calcd for C<sub>37</sub>H<sub>44</sub>NNaO<sub>3</sub>PS<sup>+</sup> [M+Na]<sup>+</sup>: 636.2672, found 636.2675.

**Compound 8s** (*E*)-(3-(benzylamino)-2-tosylallyl)bis(3,5-dimethylphenyl)phosphine oxide

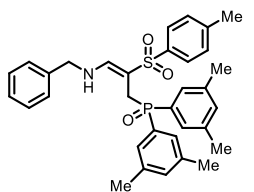

Chemical formula: C<sub>33</sub>H<sub>36</sub>NO<sub>3</sub>PS

Molecular weight: 557.69 g.mol<sup>-1</sup>

White solid

Melting point: 95–97 °C

Yield: 84%

**<sup>1</sup>H NMR (500 MHz, CDCl<sub>3</sub>)** δ 8.78–8.73 (m, 1H), 7.46–7.43 (m, 3H), 7.26–7.18 (m, 7H), 7.13–7.11 (m, 2H), 7.07–7.03 (m, 4H), 4.29 (d, *J* = 6.0 Hz, 2H), 3.13 (d, *J* = 13.5 Hz, 2H), 2.28 (s, 3H), 2.23 (s, 12H).

**<sup>13</sup>C NMR (126 MHz, CDCl<sub>3</sub>)** δ 150.2 (d, *J*<sub>C-P</sub> = 2.9 Hz), 142.2, 140.5, 138.8, 138.5 (d, *J*<sub>C-P</sub> = 12.7 Hz), 134.0 (d, *J*<sub>C-P</sub> = 2.9 Hz), 131.0 (d, *J*<sub>C-P</sub> = 99.4 Hz), 129.5, 128.7, 128.5 (d, *J*<sub>C-P</sub> = 9.6 Hz), 127.5, 127.2, 126.5, 94.1 (d, *J*<sub>C-P</sub> = 4.4 Hz), 52.8, 29.4 (d, *J*<sub>C-P</sub> = 67.7 Hz), 21.5, 21.4.

**<sup>31</sup>P NMR (121 MHz, CDCl<sub>3</sub>)** δ 35.41 (s, 1P).

**IR (neat):** ν = 2921, 1648, 1283, 1196, 1137, 736, 659 cm<sup>-1</sup>.

**ESI-HRMS (ESI-TOF):** *m/z* calcd for C<sub>33</sub>H<sub>36</sub>NNaO<sub>3</sub>PS<sup>+</sup> [M+Na]<sup>+</sup>: 580.2046, found 580.2045.

**Compound 8t** (*E*)-(4-(benzylamino)-3-tosylbut-3-en-2-yl)diphenylphosphine oxide

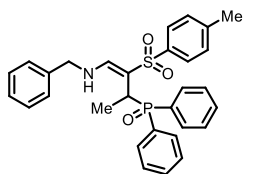

Chemical formula: C<sub>30</sub>H<sub>30</sub>NO<sub>3</sub>PS

Molecular weight: 515.61 g.mol<sup>-1</sup>

White solid

Melting point: 90–92 °C

Yield: 83%

**<sup>1</sup>H NMR (500 MHz, CDCl<sub>3</sub>)** δ 8.69–8.64 (m, 1H), 7.77–7.73 (m, 2H), 7.67–7.63 (m, 2H), 7.57 (d, *J* = 8.5 Hz, 2H), 7.51–7.41 (m, 5H), 7.33–7.27 (m, 5H), 7.20–7.16 (m, 4H), 4.36 (t, *J* = 5.5 Hz, 2H), 3.57–3.50 (m, 1H), 2.39 (s, 3H), 1.06–1.02 (m, 3H).

**<sup>13</sup>C NMR (126 MHz, CDCl<sub>3</sub>)** δ 148.6, 142.4, 140.7, 138.8, 131.9 (d, *J*<sub>C-P</sub> = 16.5 Hz), 131.1 (d, *J*<sub>C-P</sub> = 9.3 Hz), 130.9 (d, *J*<sub>C-P</sub> = 8.9 Hz), 129.3 (d, *J*<sub>C-P</sub> = 108.2 Hz), 129.0 (d, *J*<sub>C-P</sub> = 11.3 Hz), 128.5 (d, *J*<sub>C-P</sub> = 12.0 Hz), 127.6, 127.3, 127.0, 100.5, 53.1, 32.6 (d, *J*<sub>C-P</sub> = 67.0 Hz), 21.6, 11.3.

**<sup>31</sup>P NMR (162 MHz, CDCl<sub>3</sub>)** δ 38.40 (s, 1P).

**IR (neat):** ν = 3034, 2922, 1640, 1077, 663, 540, 452 cm<sup>-1</sup>.

**ESI-HRMS (ESI-TOF):** *m/z* calcd for C<sub>30</sub>H<sub>30</sub>NNaO<sub>3</sub>PS<sup>+</sup> [M+Na]<sup>+</sup>: 538.1585, found 538.1592.

**Compound 8u** (*E*)-3-(benzylamino)-1-phenyl-2-tosylallyl)diphenylphosphine oxide

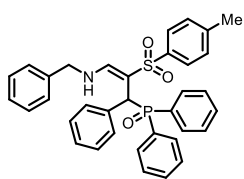

Chemical formula: C<sub>35</sub>H<sub>32</sub>NO<sub>3</sub>PS

Molecular weight: 577.68 g.mol<sup>-1</sup>

White solid

Melting point: 87–89 °C

Yield: 42%

**<sup>1</sup>H NMR (500 MHz, CDCl<sub>3</sub>)** δ 9.35–9.30 (m, 1H), 7.95–7.91 (m, 2H), 7.51–7.49 (m, 2H), 7.43–7.39 (m, 2H), 7.34–7.14 (m, 10H), 7.01–6.99 (m, 2H), 6.85–6.82 (m, 1H), 6.74–6.69 (m, 4H), 6.56–6.54 (m, 2H), 4.68 (d, *J* = 14.5 Hz, 1H), 4.36–4.21 (m, 2H), 2.11 (s, 3H).

**<sup>13</sup>C NMR (126 MHz, CDCl<sub>3</sub>)** δ 149.1 (d, *J*<sub>C-P</sub> = 4.2 Hz), 141.9, 140.1, 138.6, 134.8 (d, *J*<sub>C-P</sub> = 4.5 Hz), 132.3 (d, *J*<sub>C-P</sub> = 2.8 Hz), 131.9 (d, *J*<sub>C-P</sub> = 2.9 Hz), 131.5 (d, *J*<sub>C-P</sub> = 9.1 Hz), 131.3 (d, *J*<sub>C-P</sub> = 9.5 Hz), 129.9 (d, *J*<sub>C-P</sub> = 4.5 Hz), 128.8 (d, *J*<sub>C-P</sub> = 10.2 Hz), 128.6 (d, *J*<sub>C-P</sub> = 92.6 Hz), 127.9 (d, *J*<sub>C-P</sub> = 102.2 Hz), 127.6 (d, *J*<sub>C-P</sub> = 2.1 Hz), 127.3, 127.0, 126.5 (d, *J*<sub>C-P</sub> = 2.6 Hz), 101.1, 53.2, 46.0 (d, *J*<sub>C-P</sub> = 61.5 Hz), 21.3.

**<sup>31</sup>P NMR (121 MHz, CDCl<sub>3</sub>)** δ 35.83 (s, 1P).

**IR (neat):** ν = 3205, 3058, 1646, 1438, 1283, 1139, 1081, 697, 561 cm<sup>-1</sup>.

**ESI-HRMS (ESI-TOF):** *m/z* calcd for C<sub>35</sub>H<sub>32</sub>KNO<sub>3</sub>PS<sup>+</sup> [M+K]<sup>+</sup>: 616.1464, found 616.1478.

**Compound 9** (1*E,5E*)-*N*<sup>1</sup>,*N*<sup>6</sup>-dibenzyl-2,5-ditosylhexa-1,5-diene-1,6-diamine

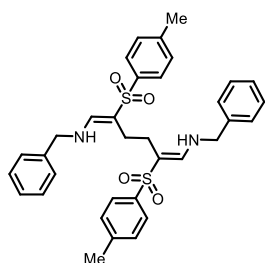

Chemical formula: C<sub>34</sub>H<sub>36</sub>N<sub>2</sub>O<sub>4</sub>S<sub>2</sub>

Molecular weight: 600.79 g.mol<sup>-1</sup>

White solid

Melting point: 110–112 °C

Yield: 5%

**<sup>1</sup>H NMR (500 MHz, CDCl<sub>3</sub>)** δ 7.63–7.61 (m, 4H), 7.40–7.29 (m, 12H), 7.23–7.21 (m, 4H), 6.51–6.46 (m, 2H), 4.32 (d, *J* = 6.0 Hz, 4H), 2.38 (s, 6H), 2.26 (s, 4H).

**<sup>13</sup>C NMR (126 MHz, CDCl<sub>3</sub>)** δ 148.0, 142.9, 138.7, 138.5, 129.6, 128.8, 127.7, 127.7, 127.3, 101.5, 52.2, 24.4, 21.6.

**IR (neat):** ν = 3334, 1640, 1273, 1131, 1080, 726, 664, 571 cm<sup>-1</sup>.

**ESI-HRMS (ESI-TOF):** *m/z* calcd for C<sub>34</sub>H<sub>37</sub>N<sub>2</sub>O<sub>4</sub>S<sub>2</sub><sup>+</sup> [M+H]<sup>+</sup>: 601.2189, found 601.2222.

**Compound TEMPO-3a** 2,2,6,6-Tetramethylpiperidin-1-yl diphenylphosphinate

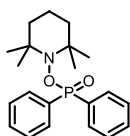

Chemical formula: C<sub>21</sub>H<sub>28</sub>NO<sub>2</sub>P

Molecular weight: 357.43 g.mol<sup>-1</sup>

Light yellow solid

Yield: 11%

**<sup>1</sup>H NMR (500 MHz, CDCl<sub>3</sub>)** δ 7.88–7.83 (m, 4H), 7.49–7.40 (m, 6H), 1.70–1.41 (m, 6H), 1.38–0.85 (m, 12H).

**<sup>13</sup>C NMR (126 MHz, CDCl<sub>3</sub>)** δ 134.0 (d, *J*<sub>C-P</sub> = 135.3 Hz), 131.8 (d, *J*<sub>C-P</sub> = 9.5 Hz), 131.7 (d, *J*<sub>C-P</sub> = 2.8 Hz), 128.4 (d, *J*<sub>C-P</sub> = 13.0 Hz), 61.7, 61.7, 40.2, 17.0.

**<sup>31</sup>P NMR (202 MHz, CDCl<sub>3</sub>)** δ 33.71 (s, 1P).

**ESI-HRMS (ESI-TOF):** *m/z* calcd for C<sub>21</sub>H<sub>29</sub>NO<sub>2</sub>P<sup>+</sup> [M+H]<sup>+</sup>: 358.1930, found 358.1924.

**15. Copies of  $^1\text{H}$  NMR,  $^{13}\text{C}$  NMR,  $^{19}\text{F}$  NMR and  $^{31}\text{P}$  NMR**

**1b** – <sup>1</sup>H NMR (500 MHz, CDCl<sub>3</sub>)

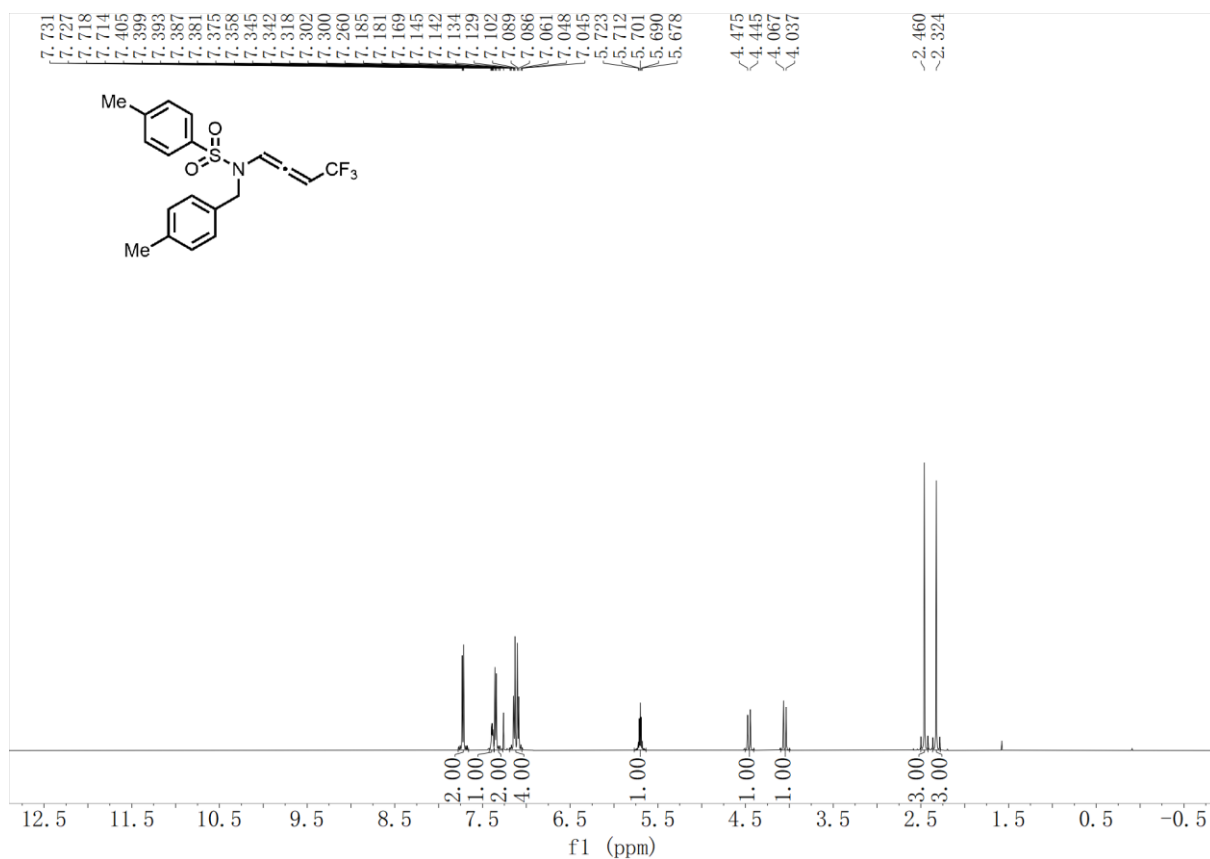

**1b** – <sup>13</sup>C NMR (126 MHz, CDCl<sub>3</sub>)

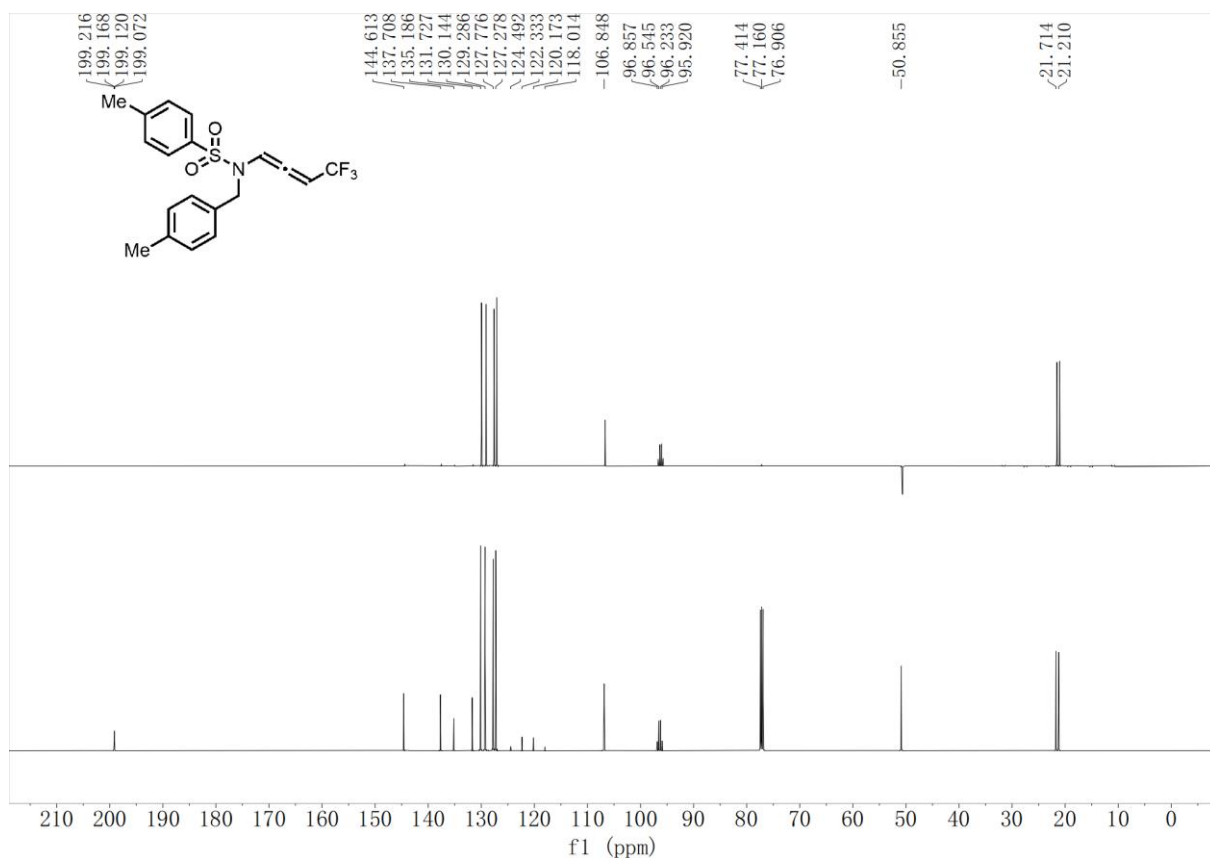

**1b** –  $^{19}\text{F}$  NMR (282 MHz,  $\text{CDCl}_3$ )

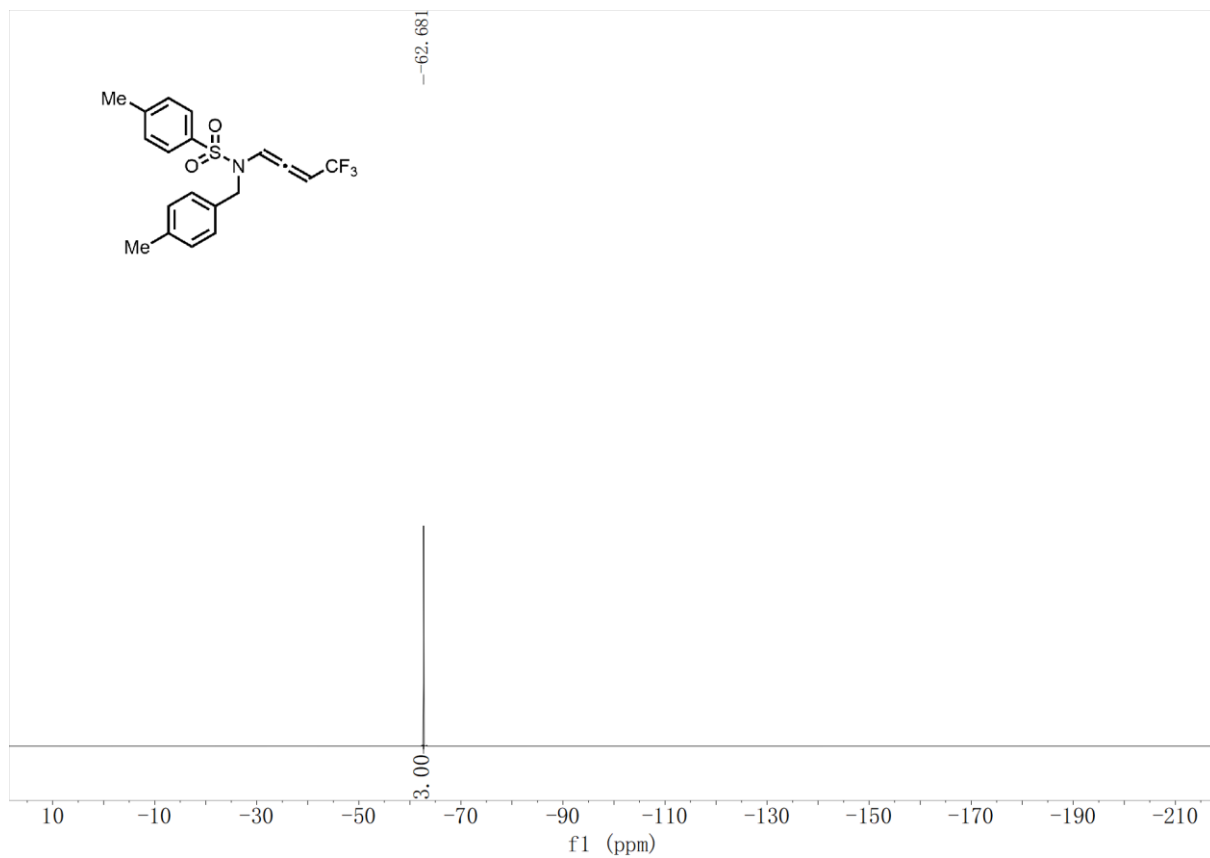

**1c** – <sup>1</sup>H NMR (500 MHz, CDCl<sub>3</sub>)

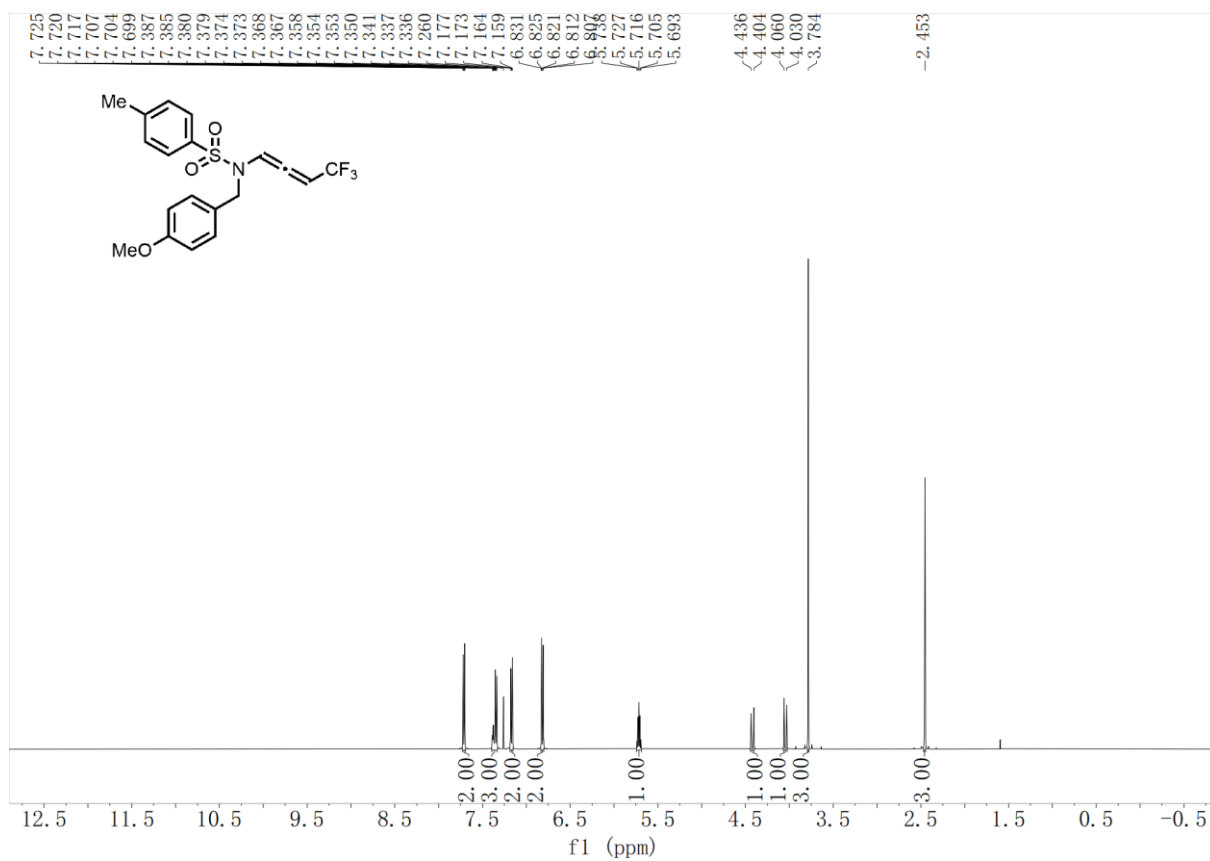

**1c** – <sup>13</sup>C NMR (126 MHz, CDCl<sub>3</sub>)

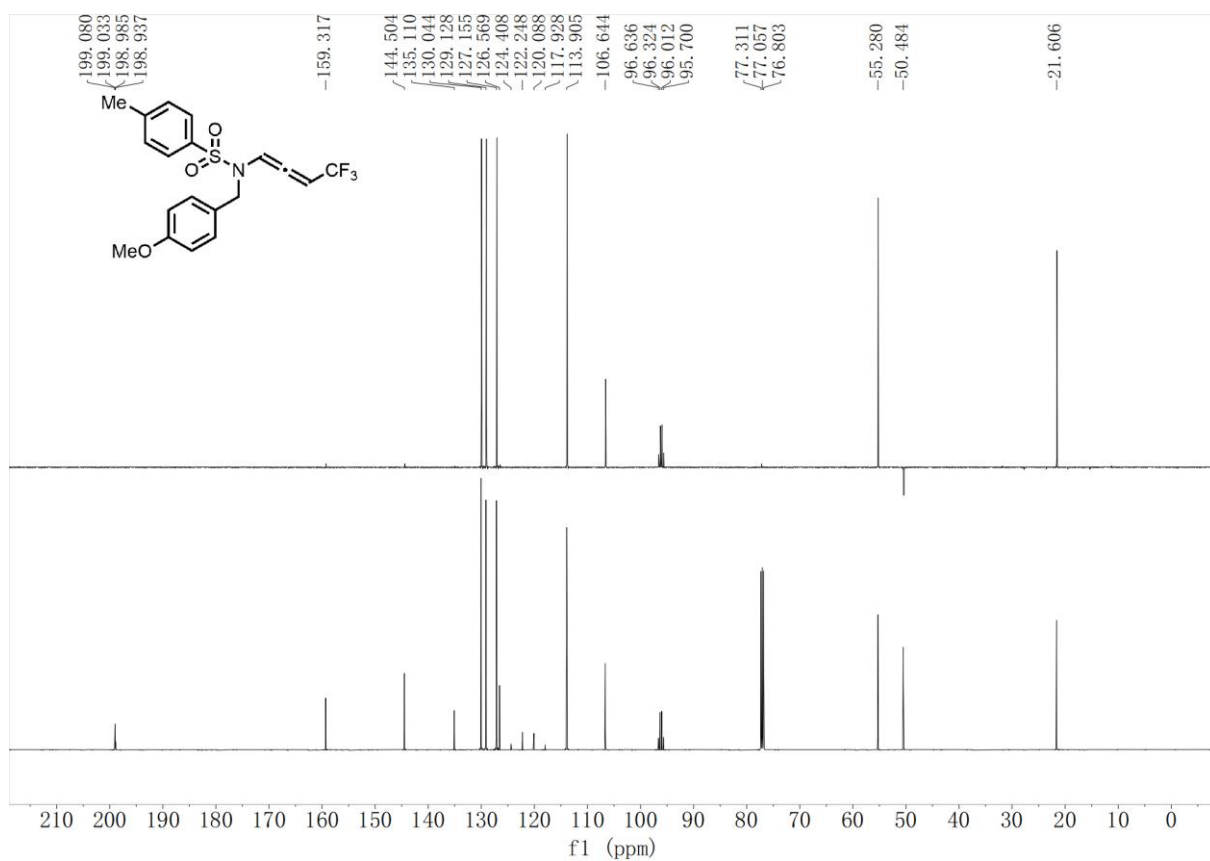

**1c** –  $^{19}\text{F}$  NMR (282 MHz,  $\text{CDCl}_3$ )

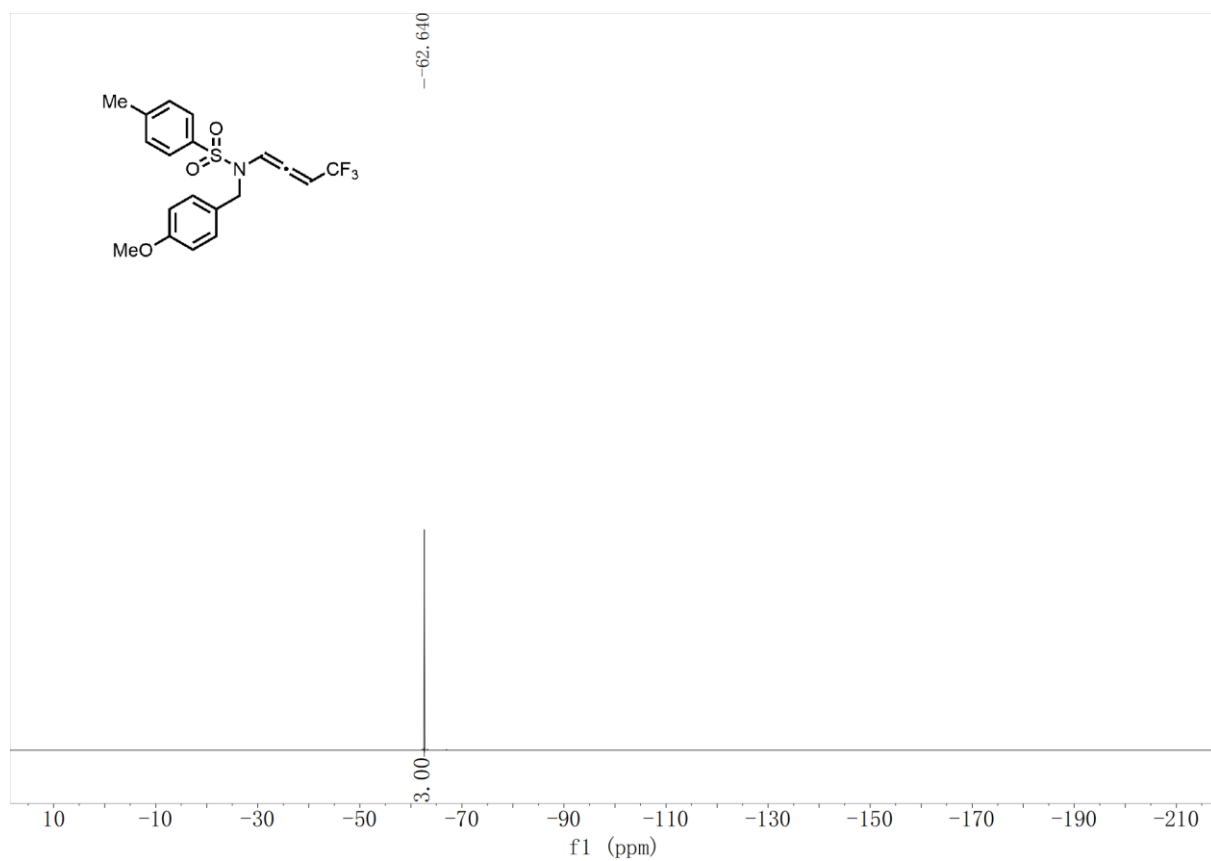

**1d** – <sup>1</sup>H NMR (500 MHz, CDCl<sub>3</sub>)

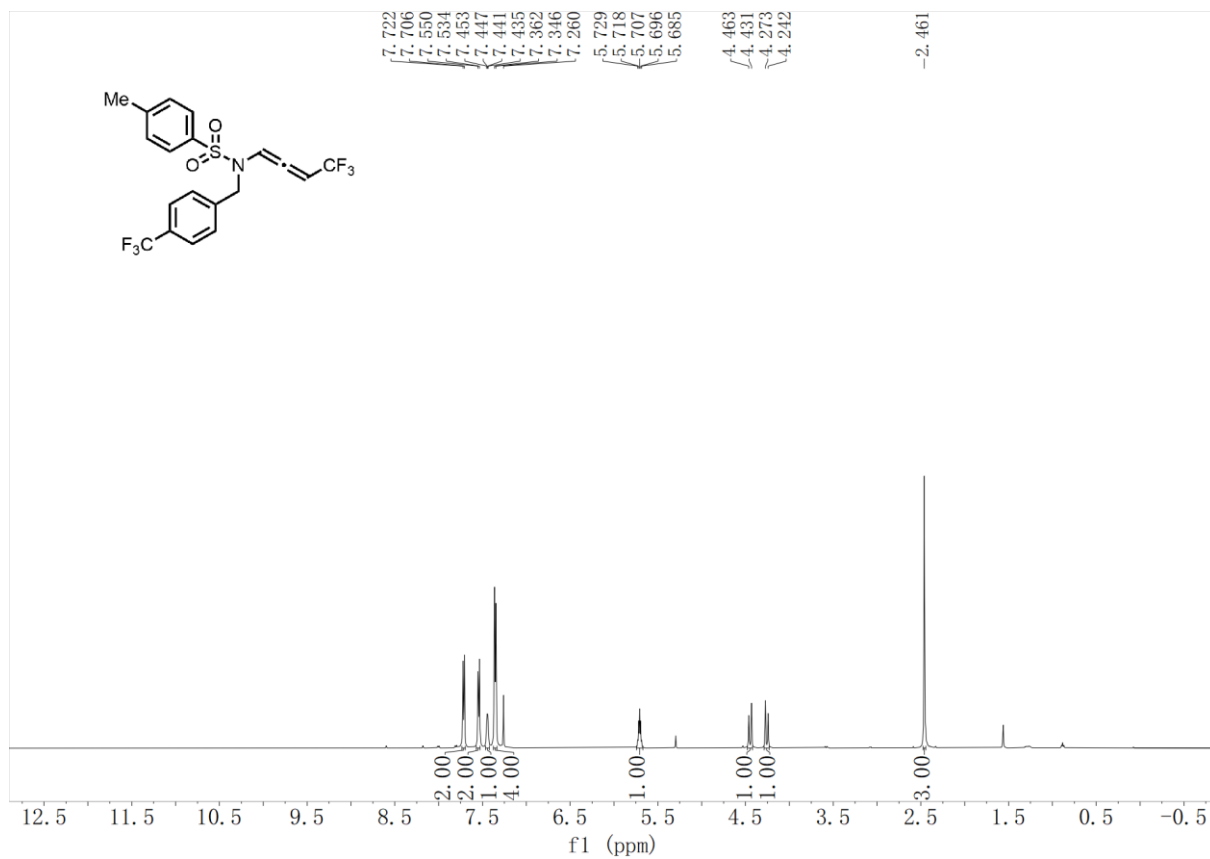

**1d** – <sup>13</sup>C NMR (126 MHz, CDCl<sub>3</sub>)

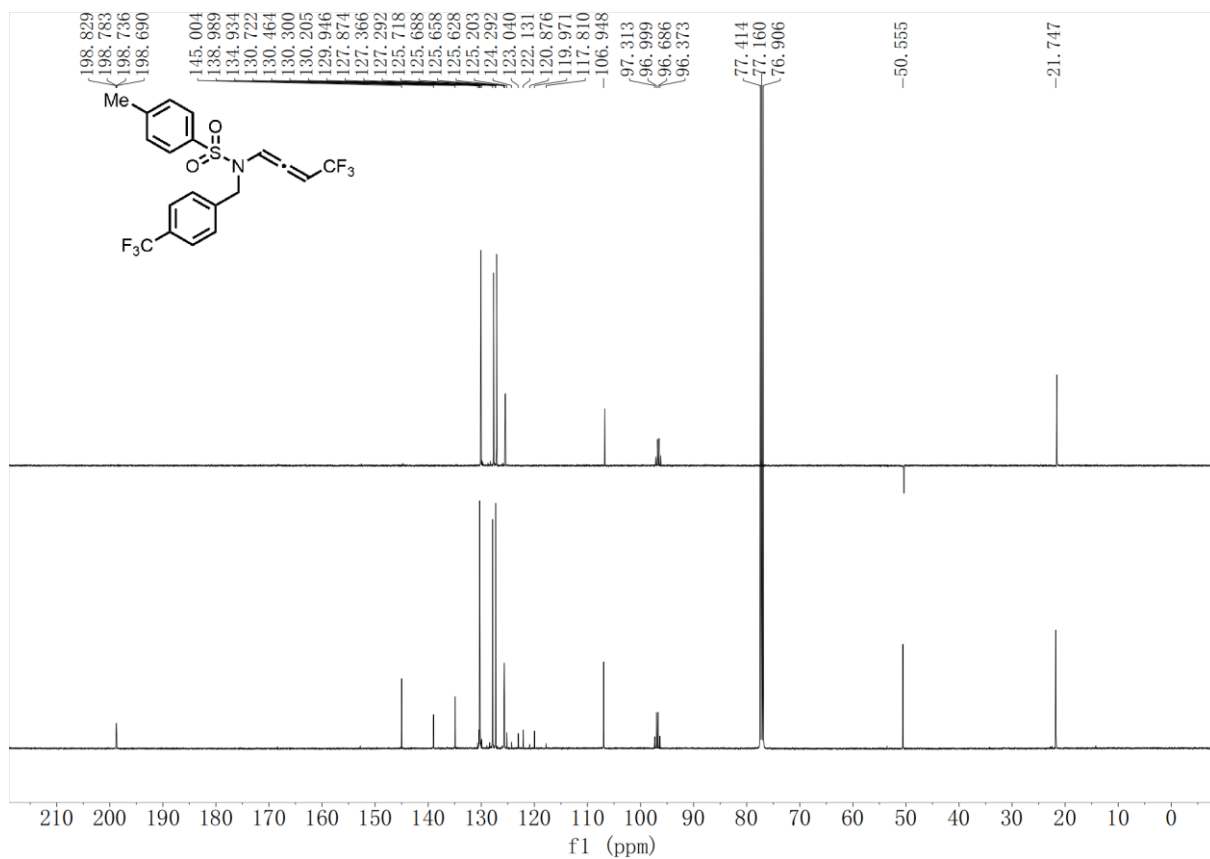



**1d** – <sup>19</sup>F NMR (471 MHz, CDCl<sub>3</sub>)

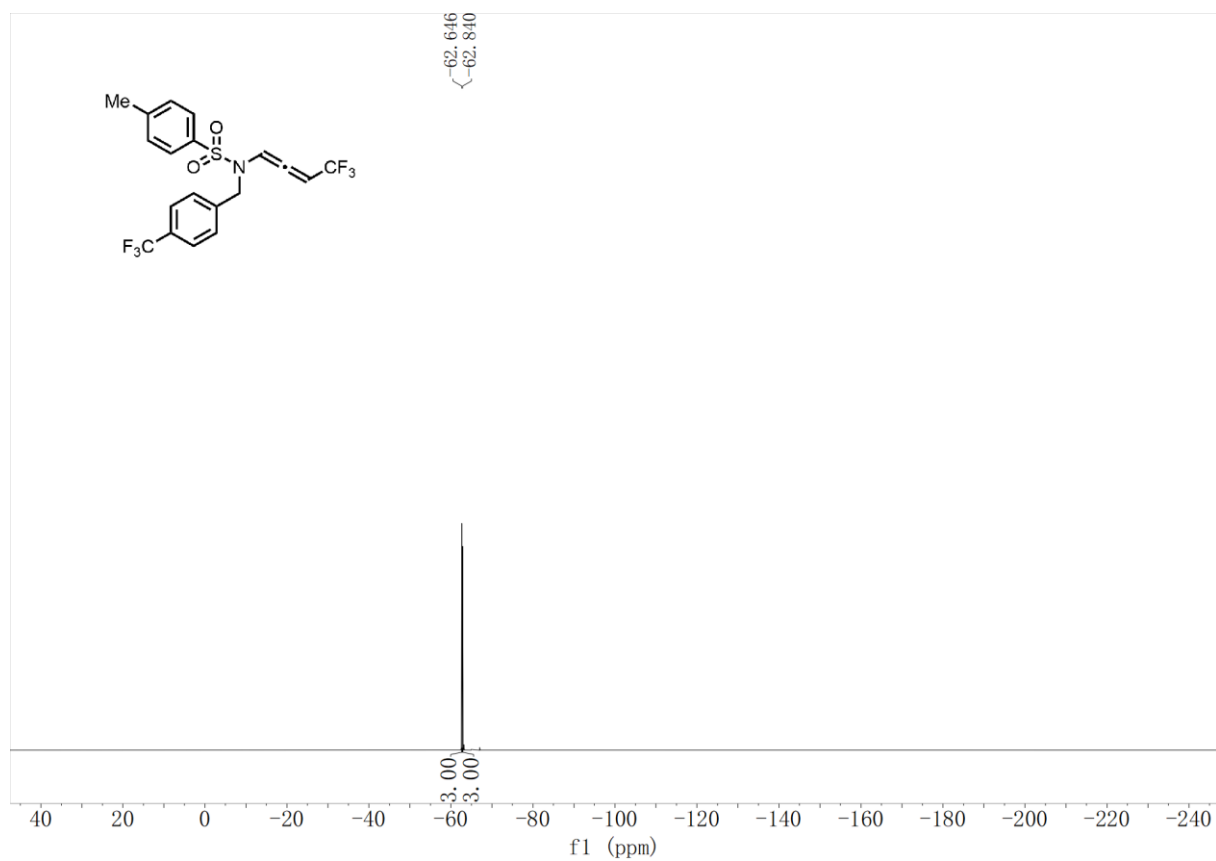

**1e** –  $^1\text{H}$  NMR (500 MHz,  $\text{C}_6\text{D}_6$ )

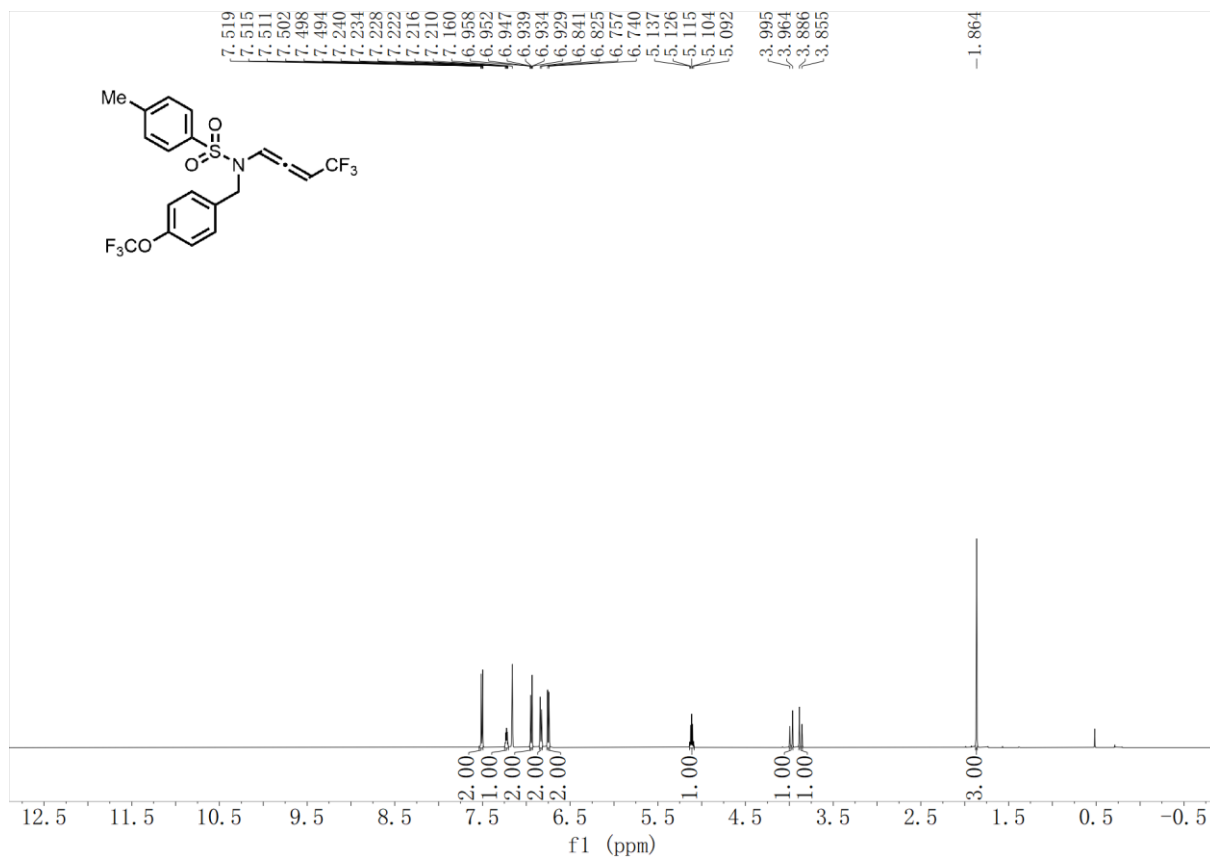

**1e** –  $^{13}\text{C}$  NMR (126 MHz,  $\text{C}_6\text{D}_6$ )

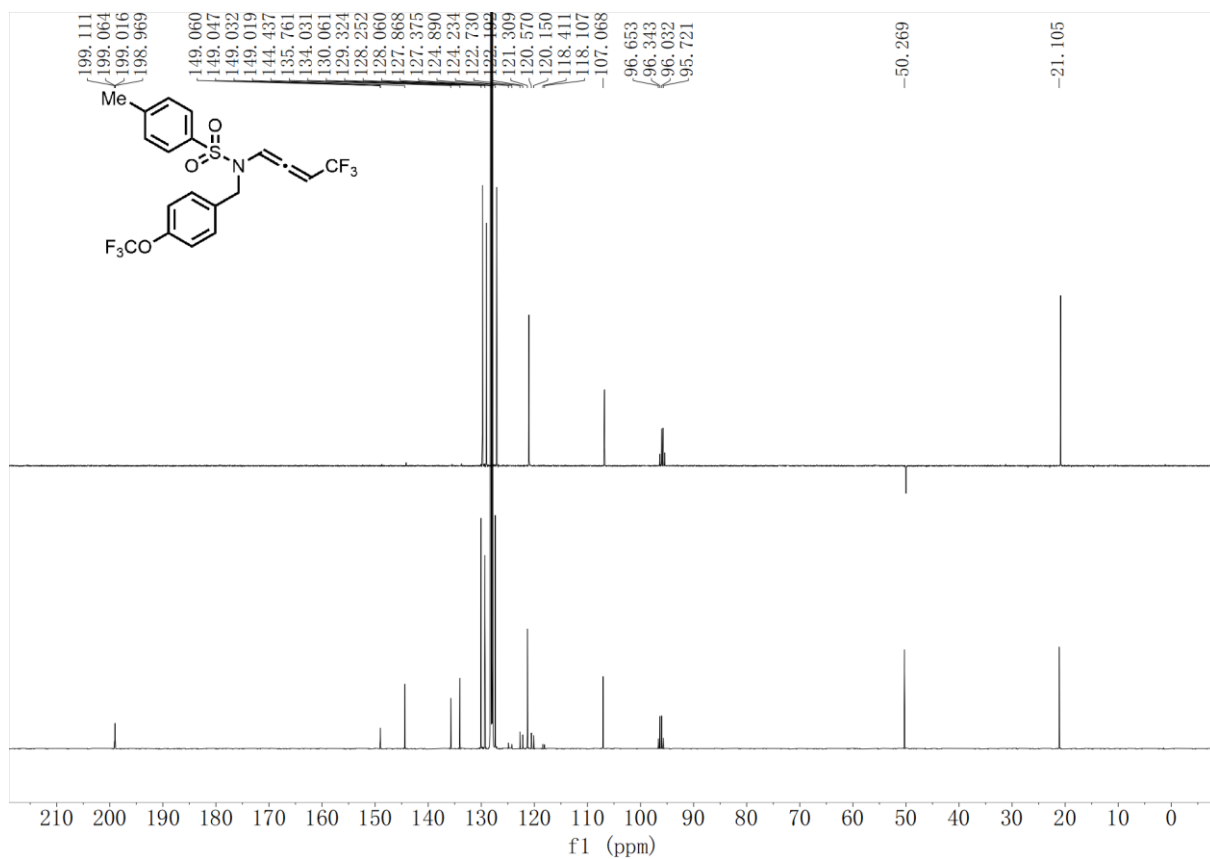

**1e** –  $^{19}\text{F}$  NMR (282 MHz,  $\text{C}_6\text{D}_6$ )

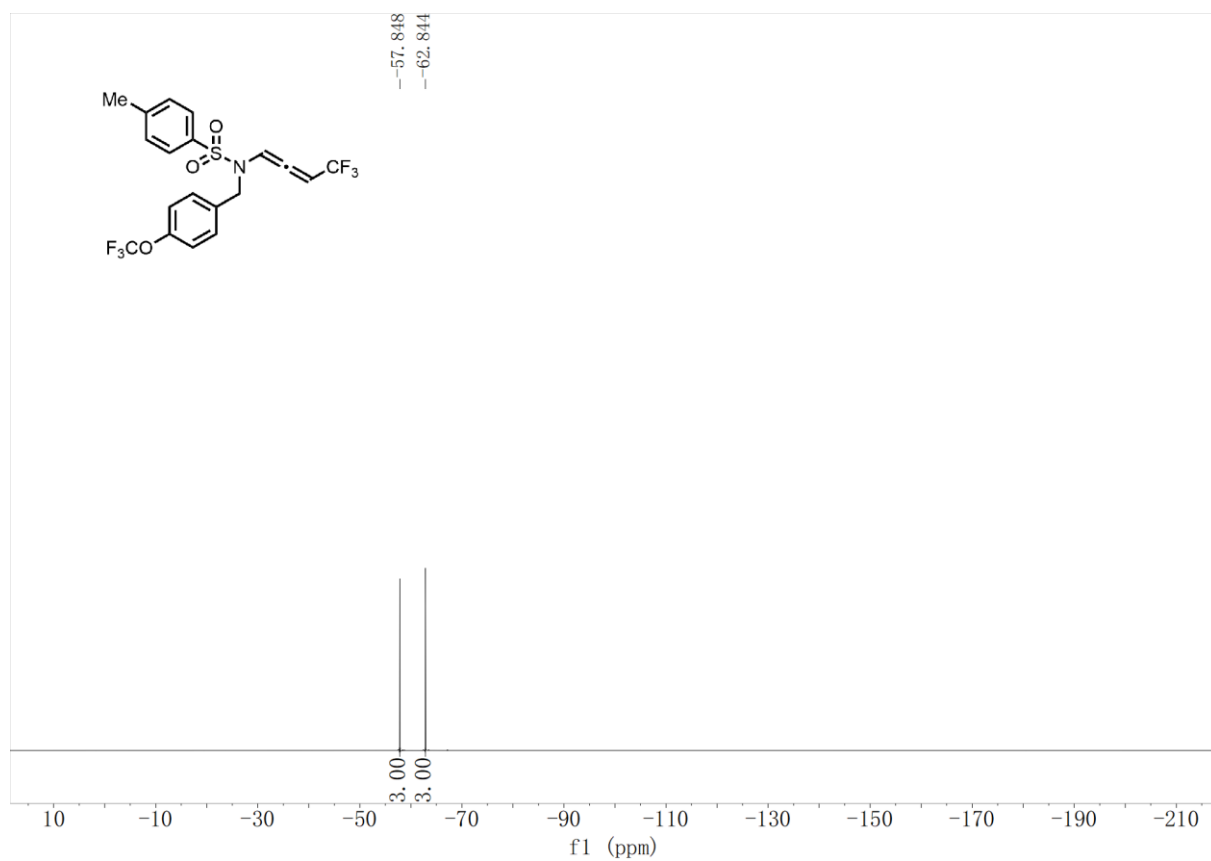

**1g** – <sup>1</sup>H NMR (500 MHz, CDCl<sub>3</sub>)

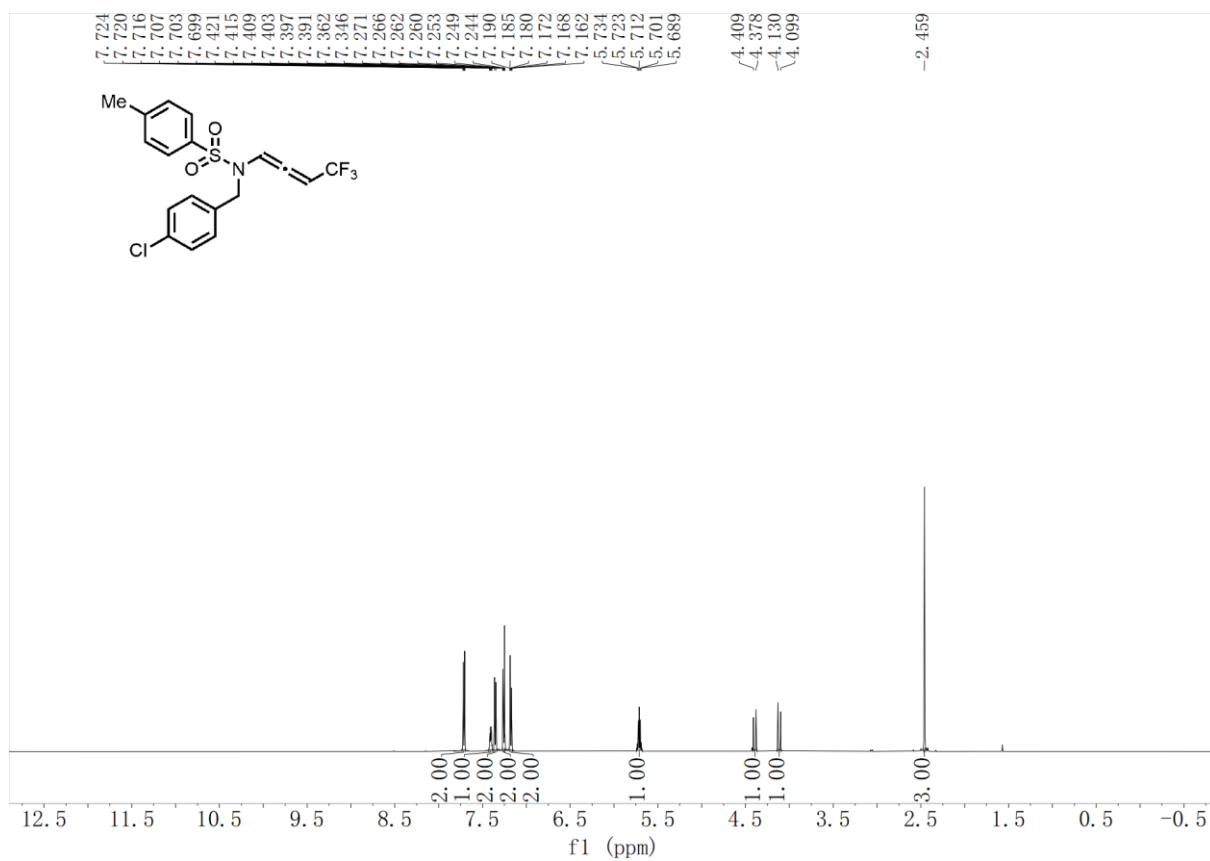

**1g** – <sup>13</sup>C NMR (126 MHz, CDCl<sub>3</sub>)

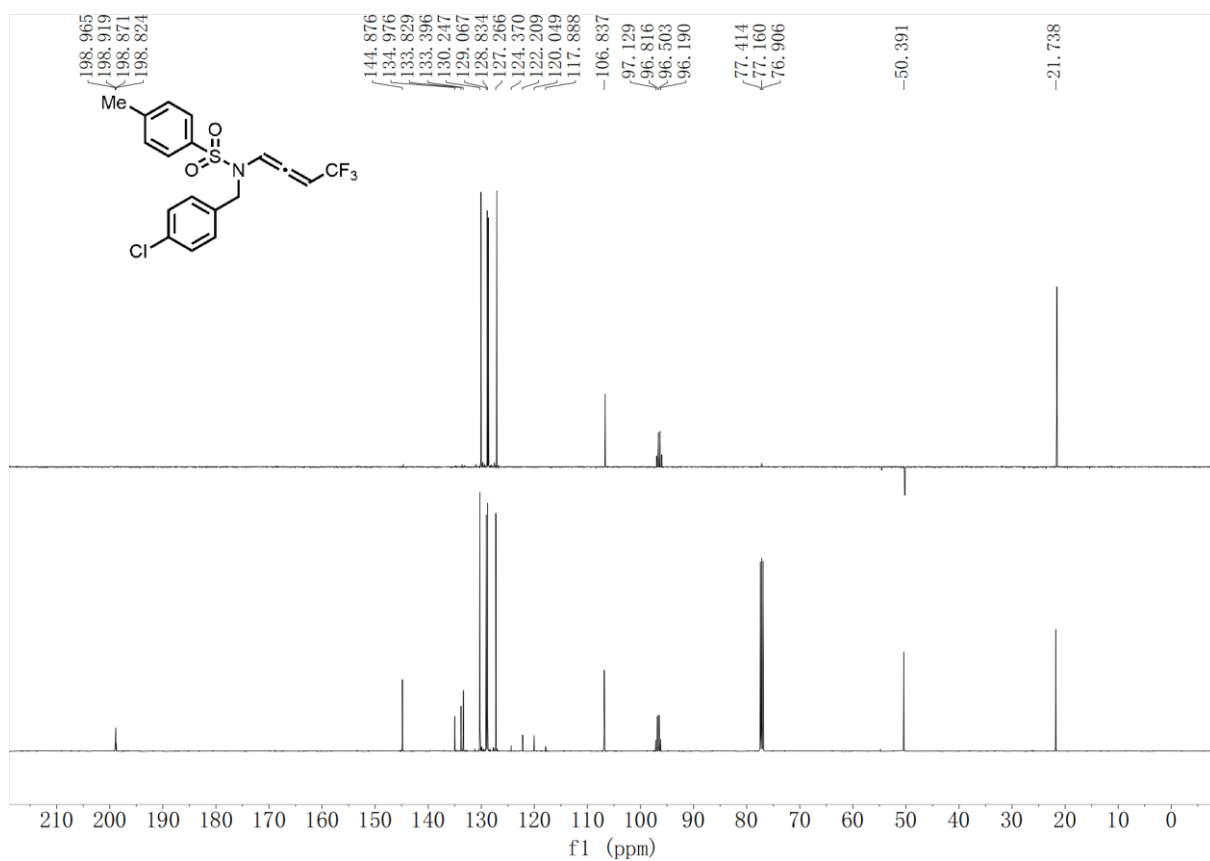

**1g** –  $^{19}\text{F}$  NMR (282 MHz,  $\text{CDCl}_3$ )

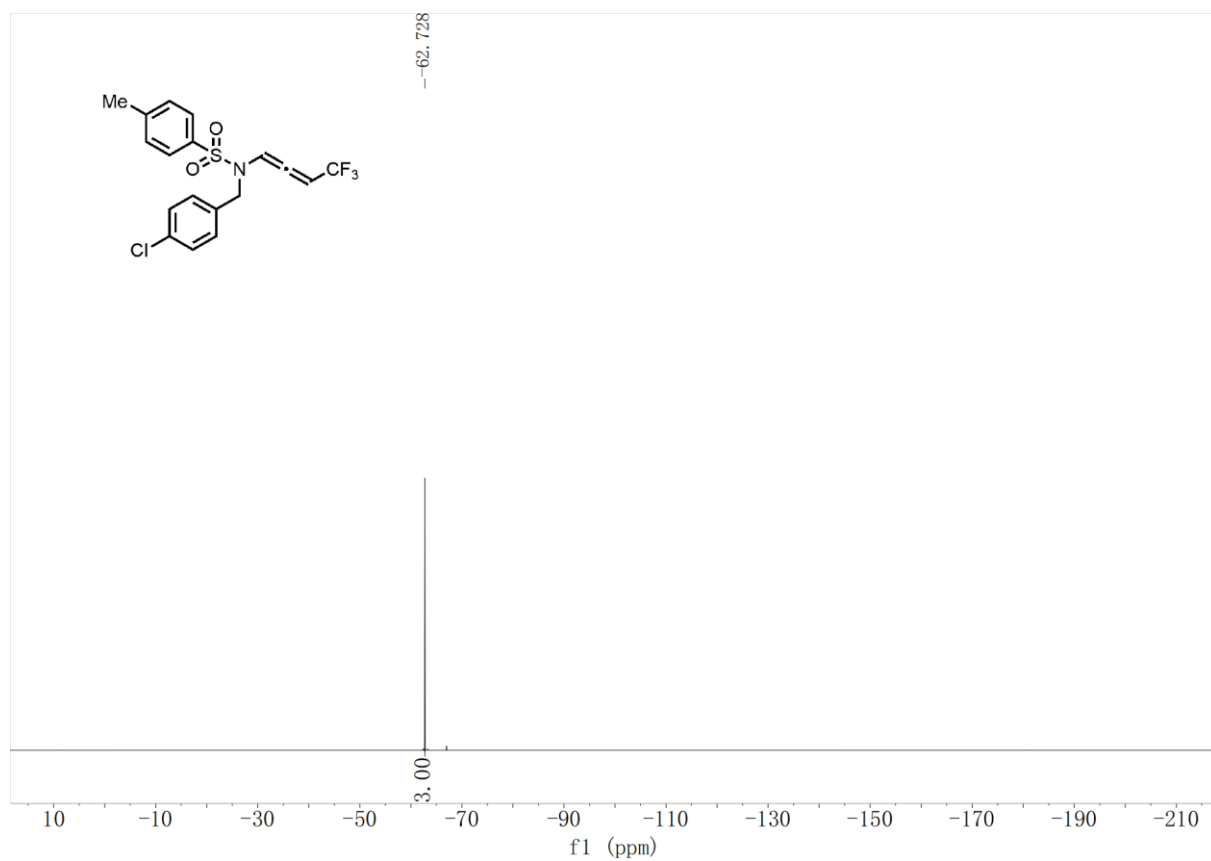

**1h** – <sup>1</sup>H NMR (500 MHz, CDCl<sub>3</sub>)

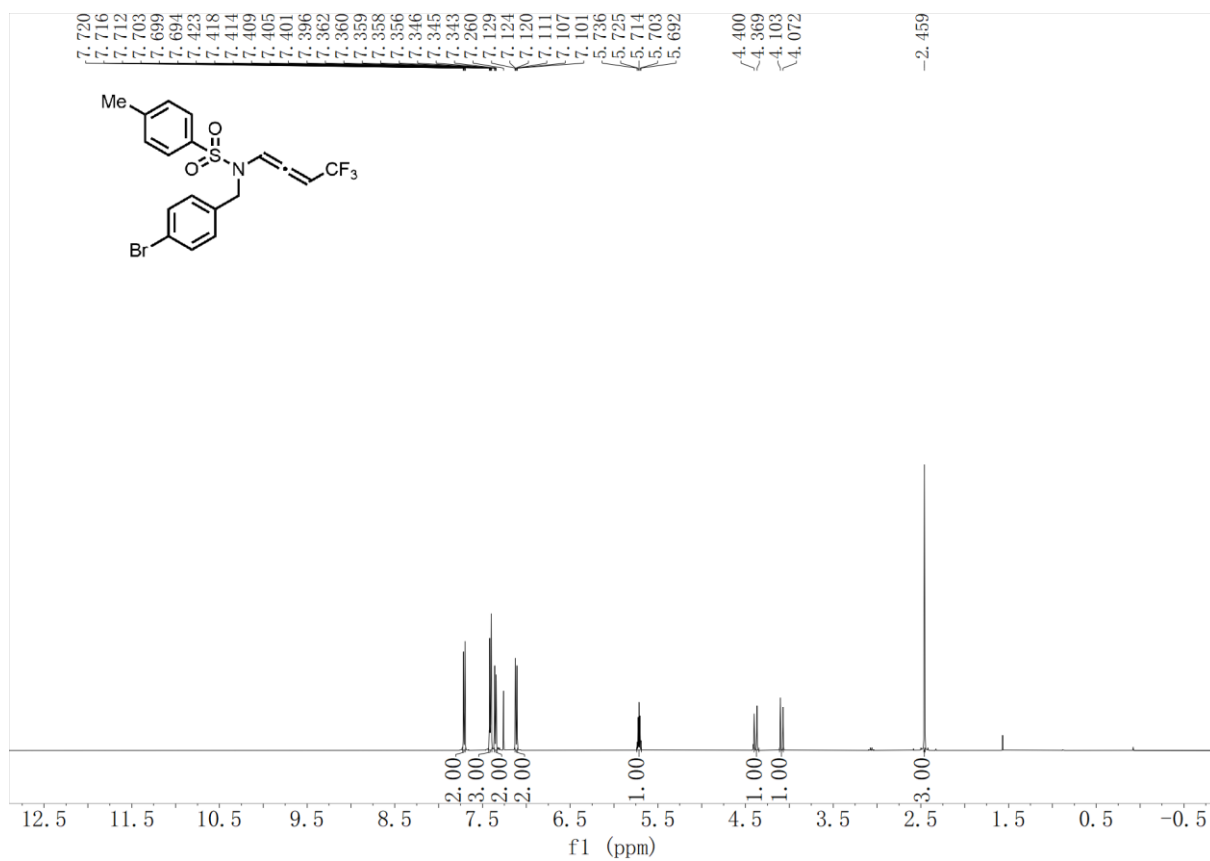

**1h** – <sup>13</sup>C NMR (126 MHz, CDCl<sub>3</sub>)

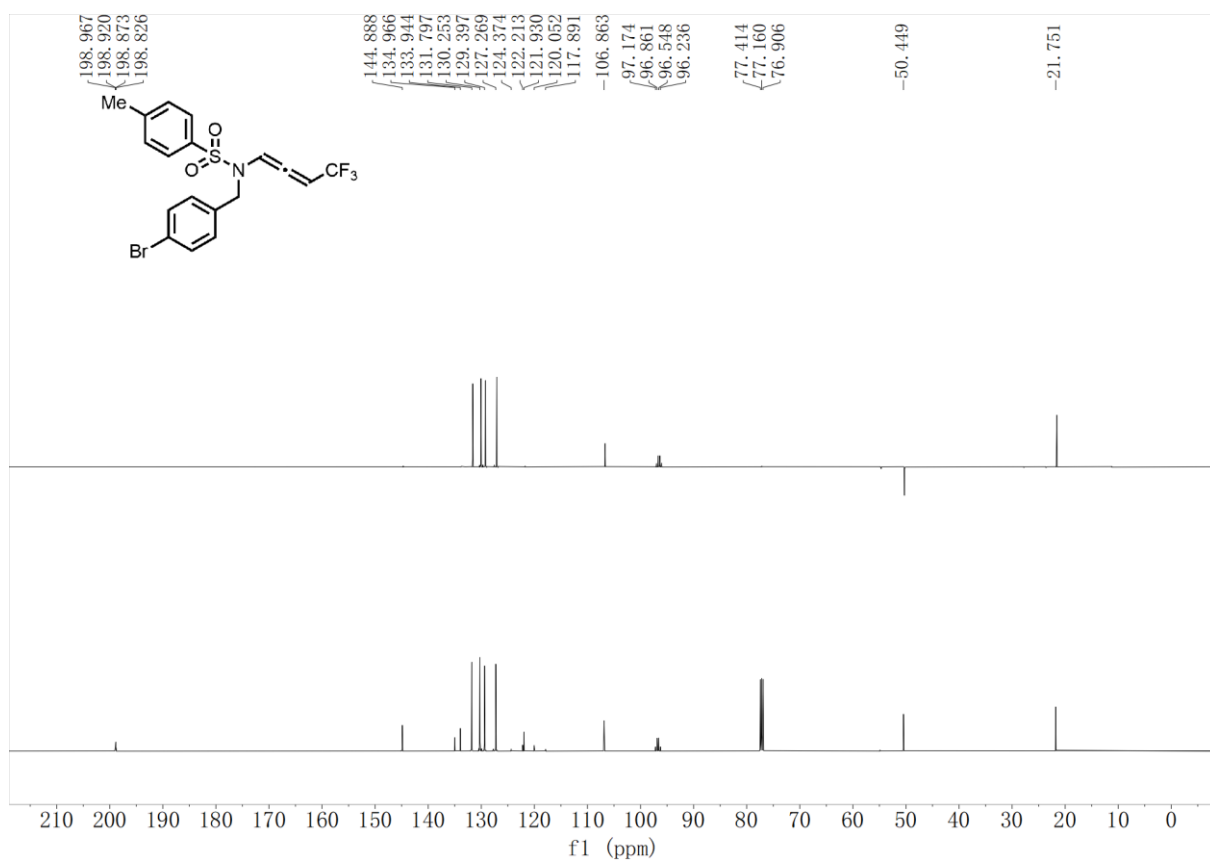

**1h** –  $^{19}\text{F}$  NMR (282 MHz,  $\text{CDCl}_3$ )

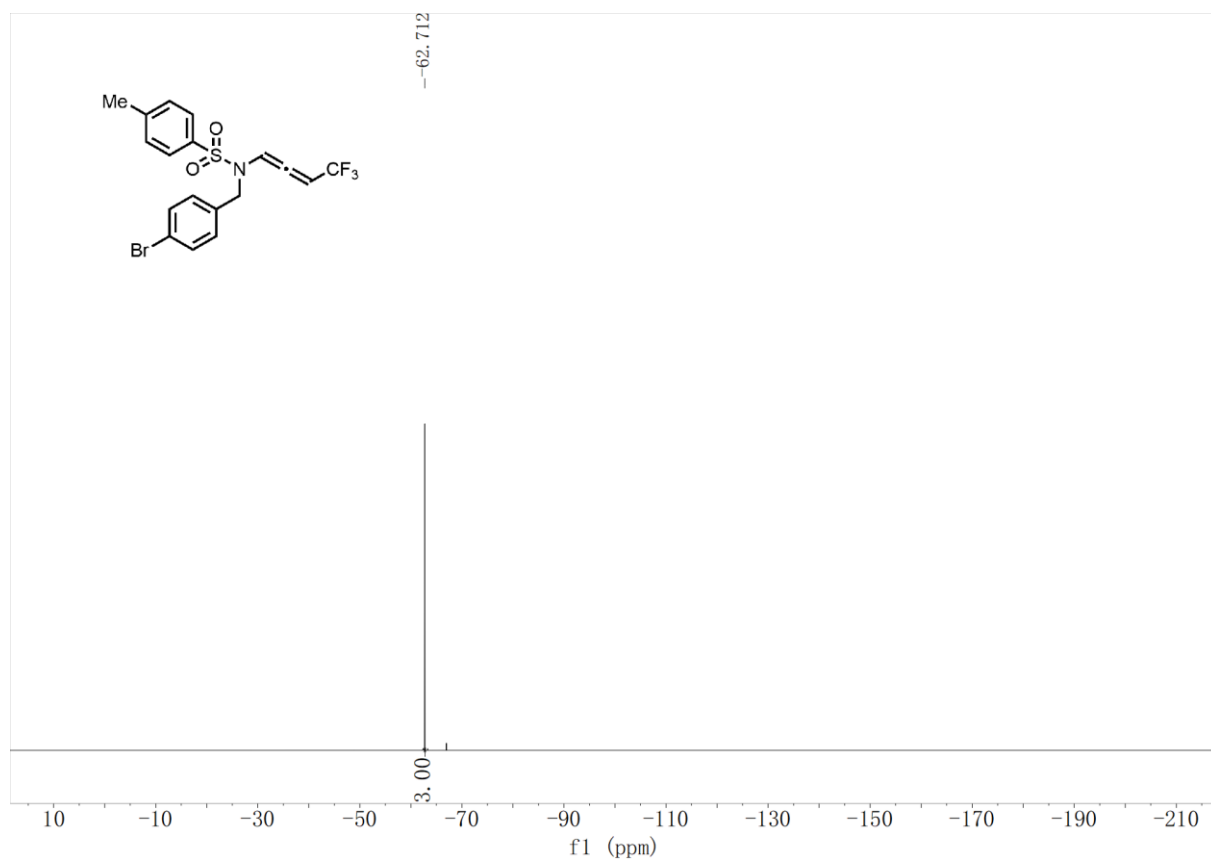

1i – <sup>1</sup>H NMR (500 MHz, CDCl<sub>3</sub>)

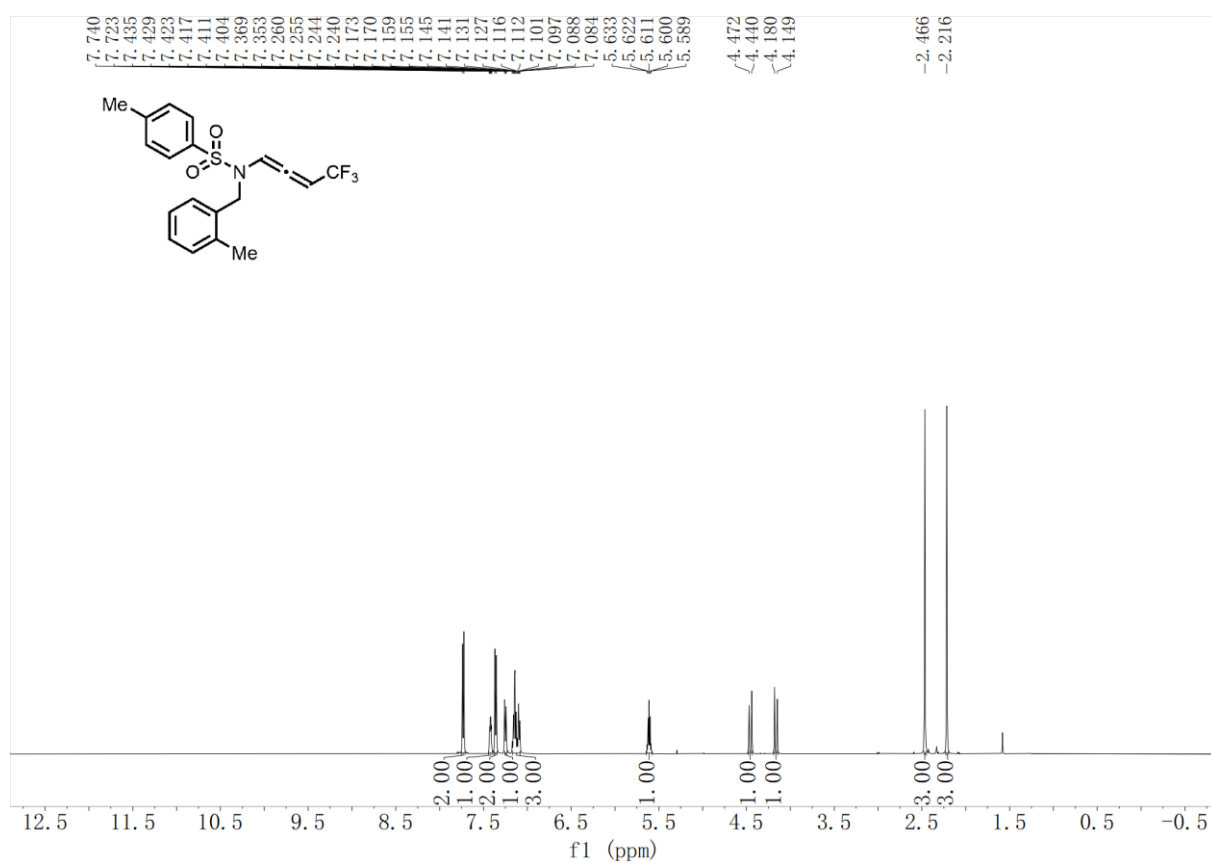

1i – <sup>13</sup>C NMR (126 MHz, CDCl<sub>3</sub>)

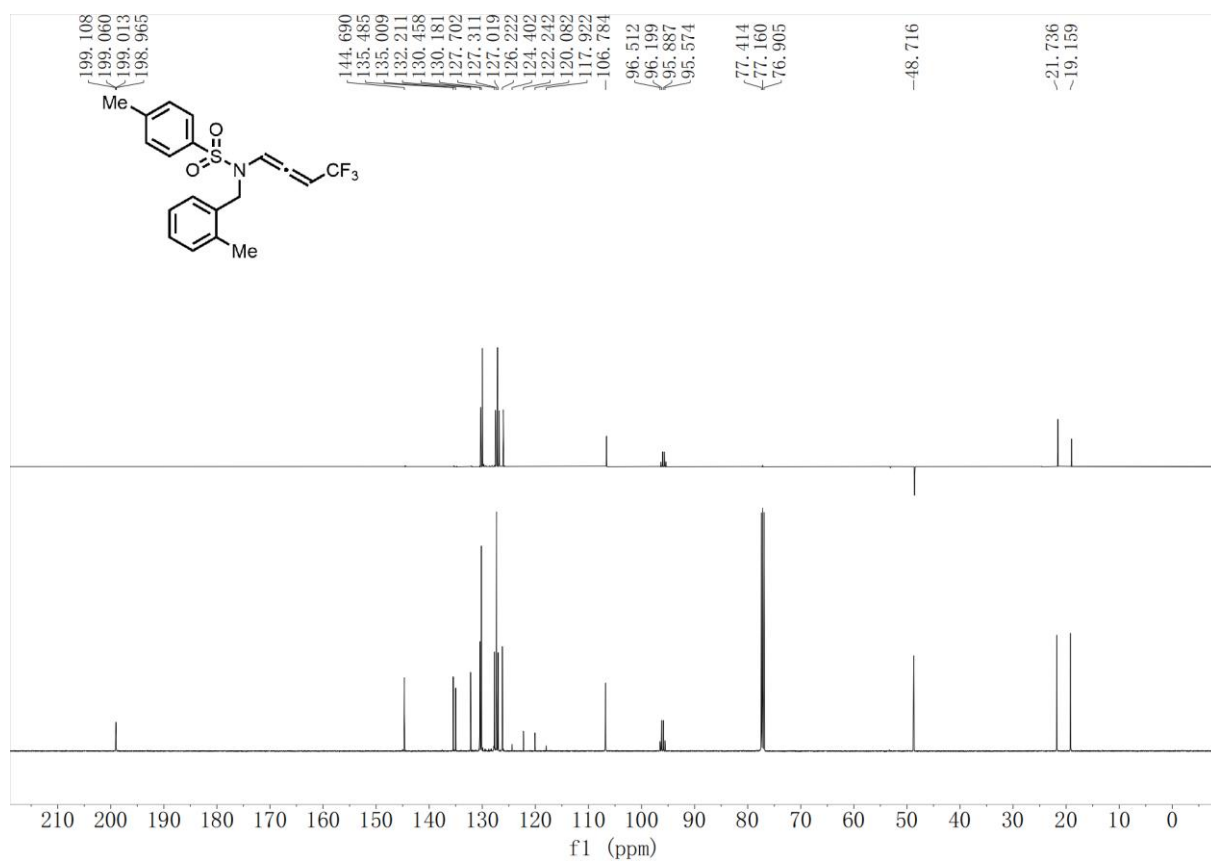



1i –  $^{19}\text{F}$  NMR (471 MHz,  $\text{CDCl}_3$ )

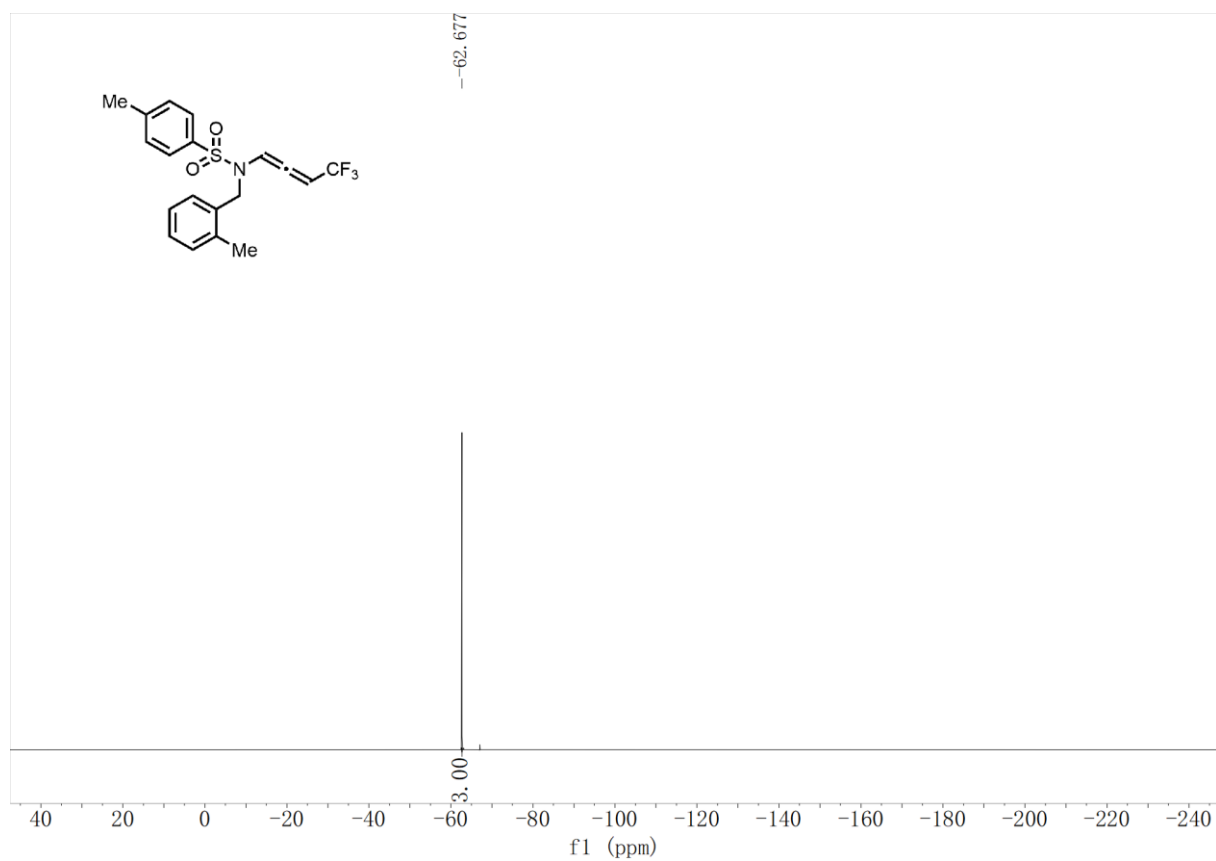

**1j** –  $^1\text{H}$  NMR (300 MHz,  $\text{CDCl}_3$ )

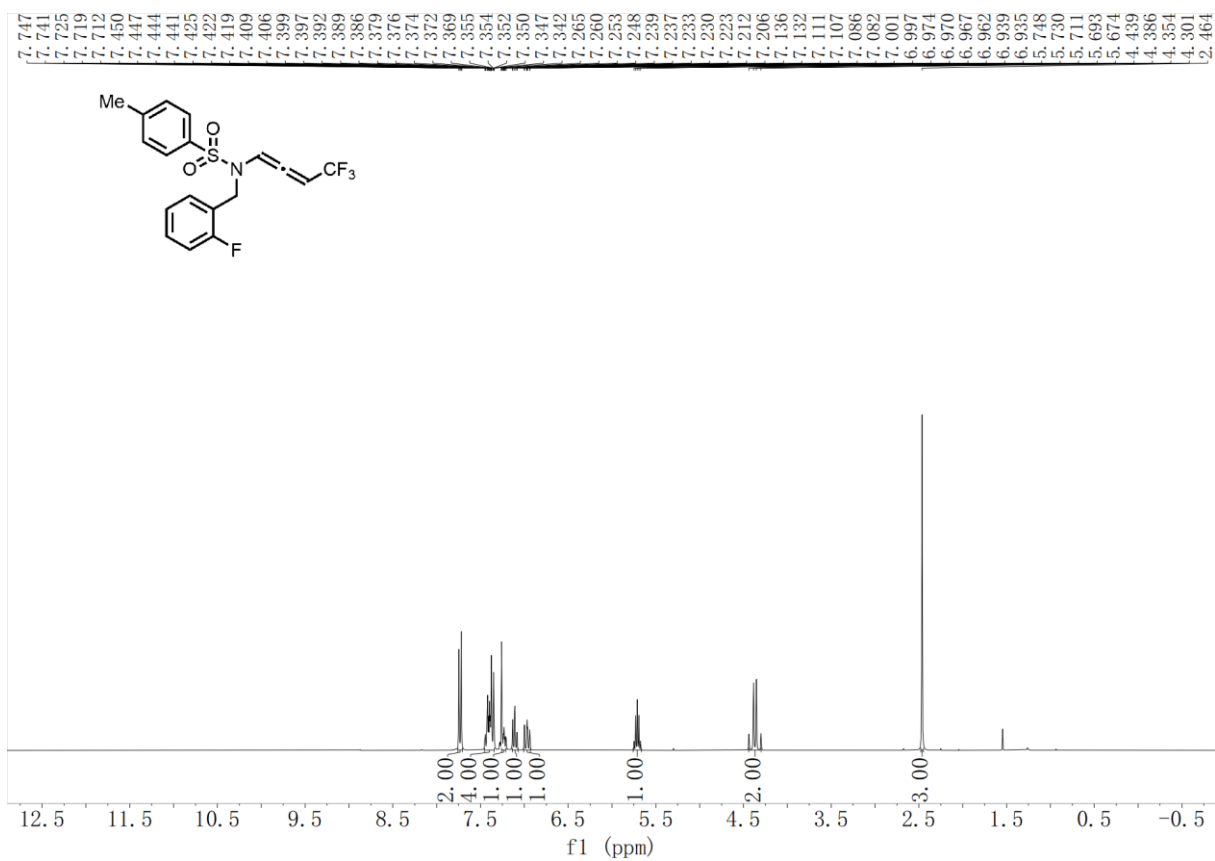

**1j** –  $^{13}\text{C}$  NMR (126 MHz,  $\text{CDCl}_3$ )

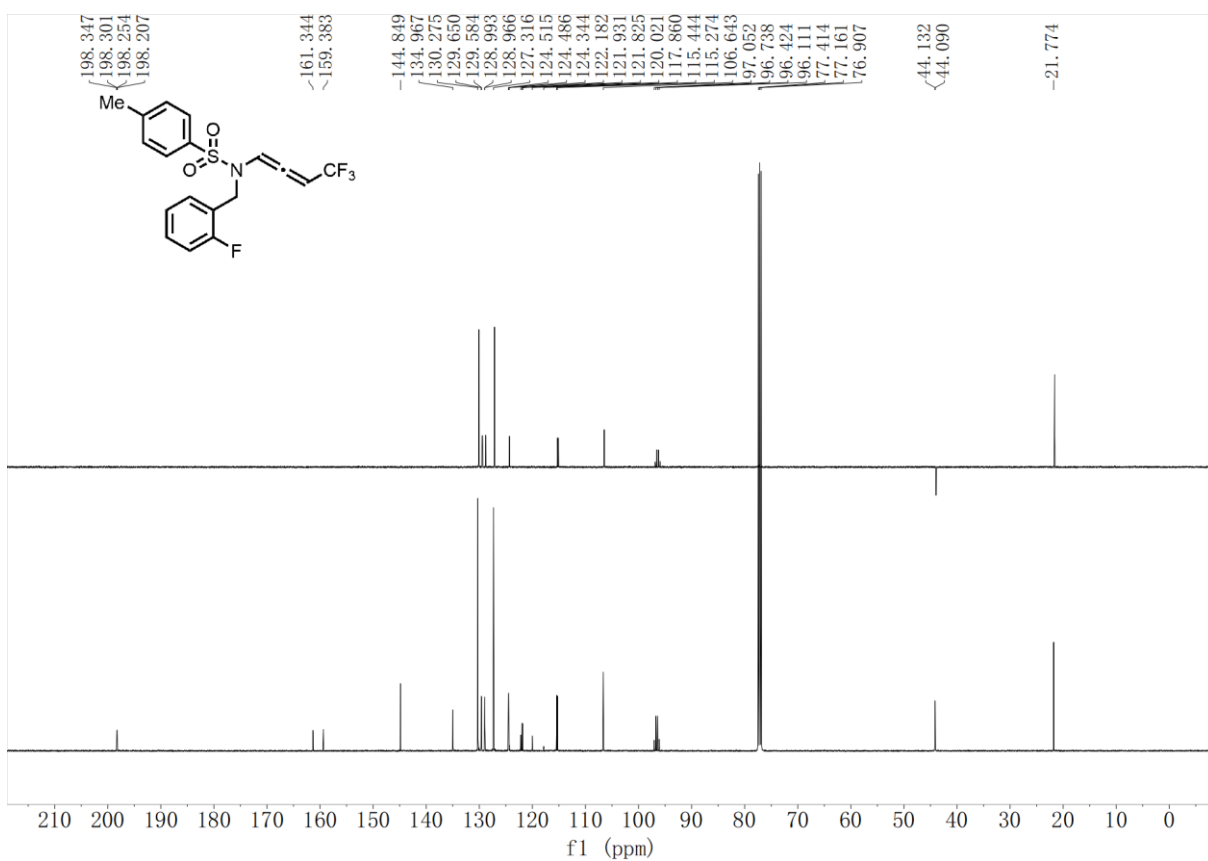

1j –  $^{19}\text{F}$  NMR (282 MHz,  $\text{CDCl}_3$ )

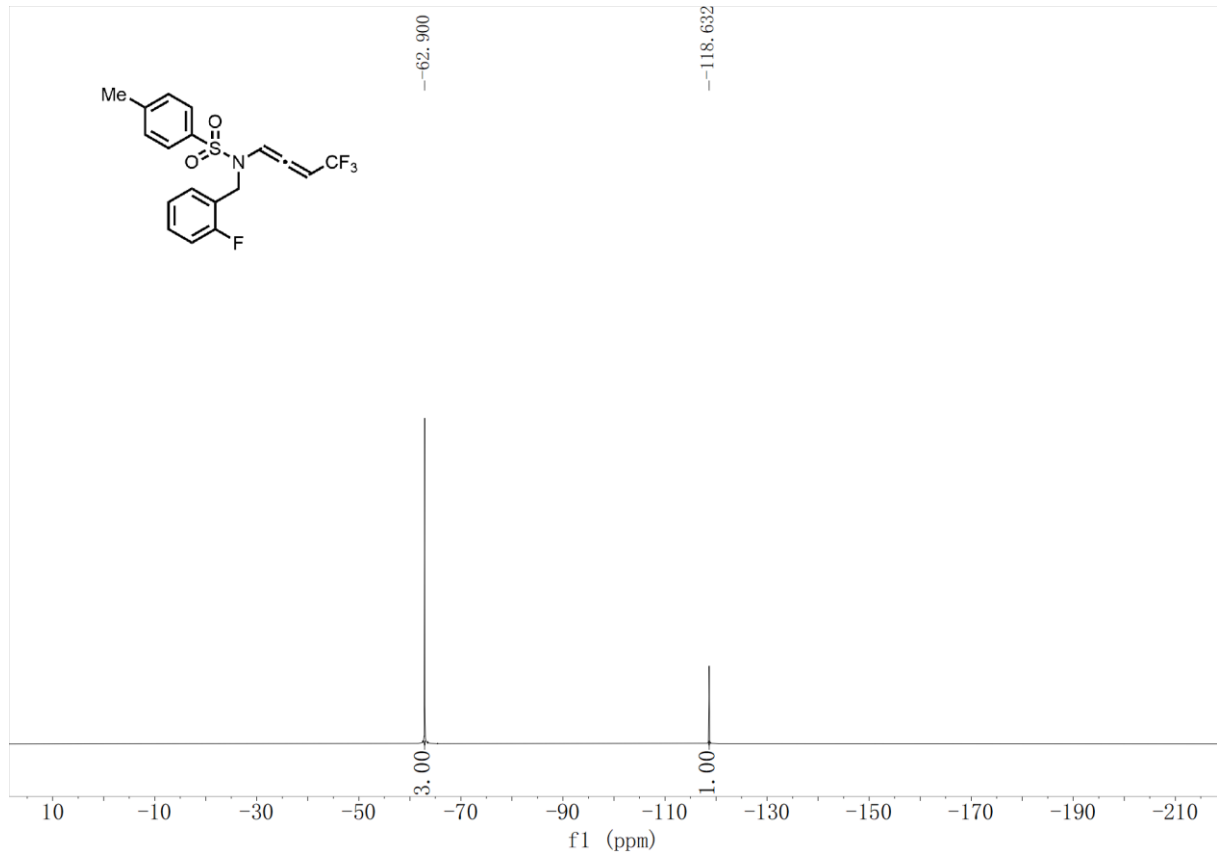

**1k** – <sup>1</sup>H NMR (400 MHz, CDCl<sub>3</sub>)

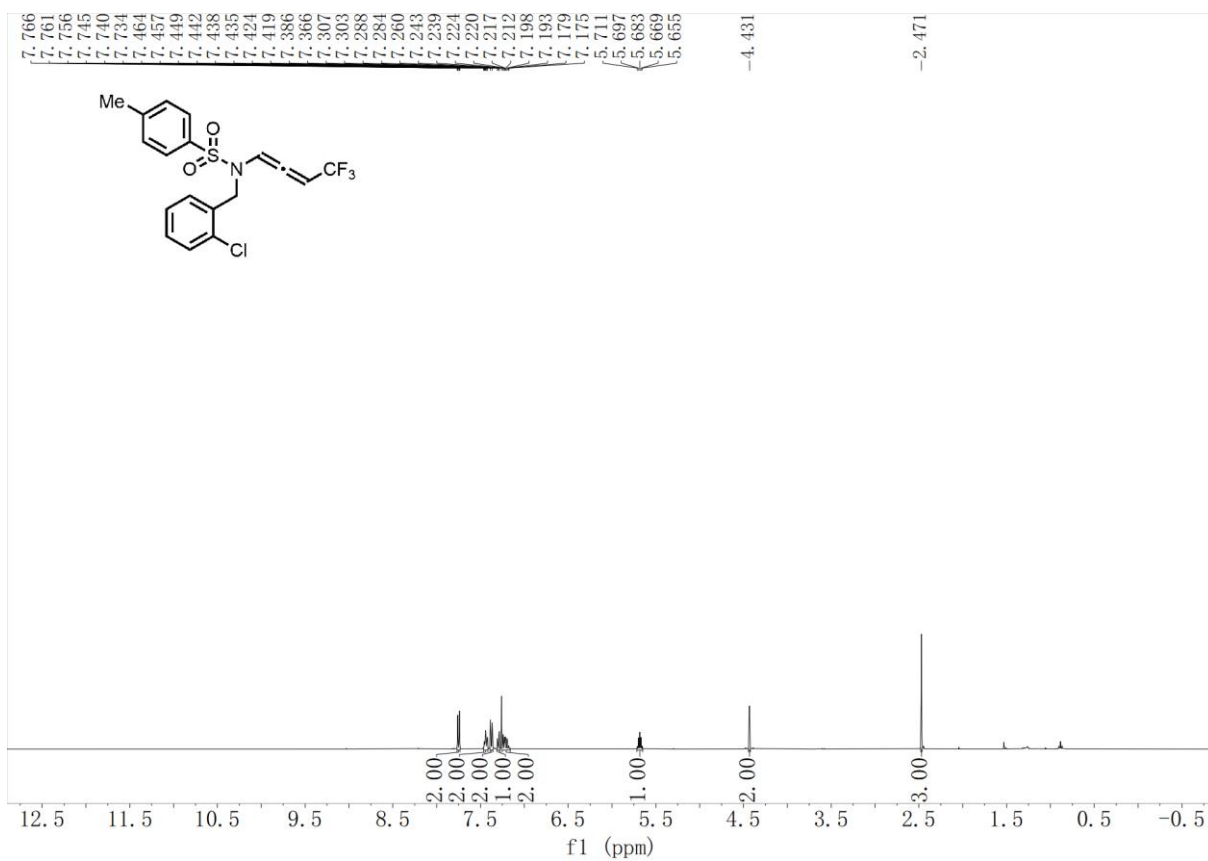

**1k** – <sup>13</sup>C NMR (126 MHz, CDCl<sub>3</sub>)

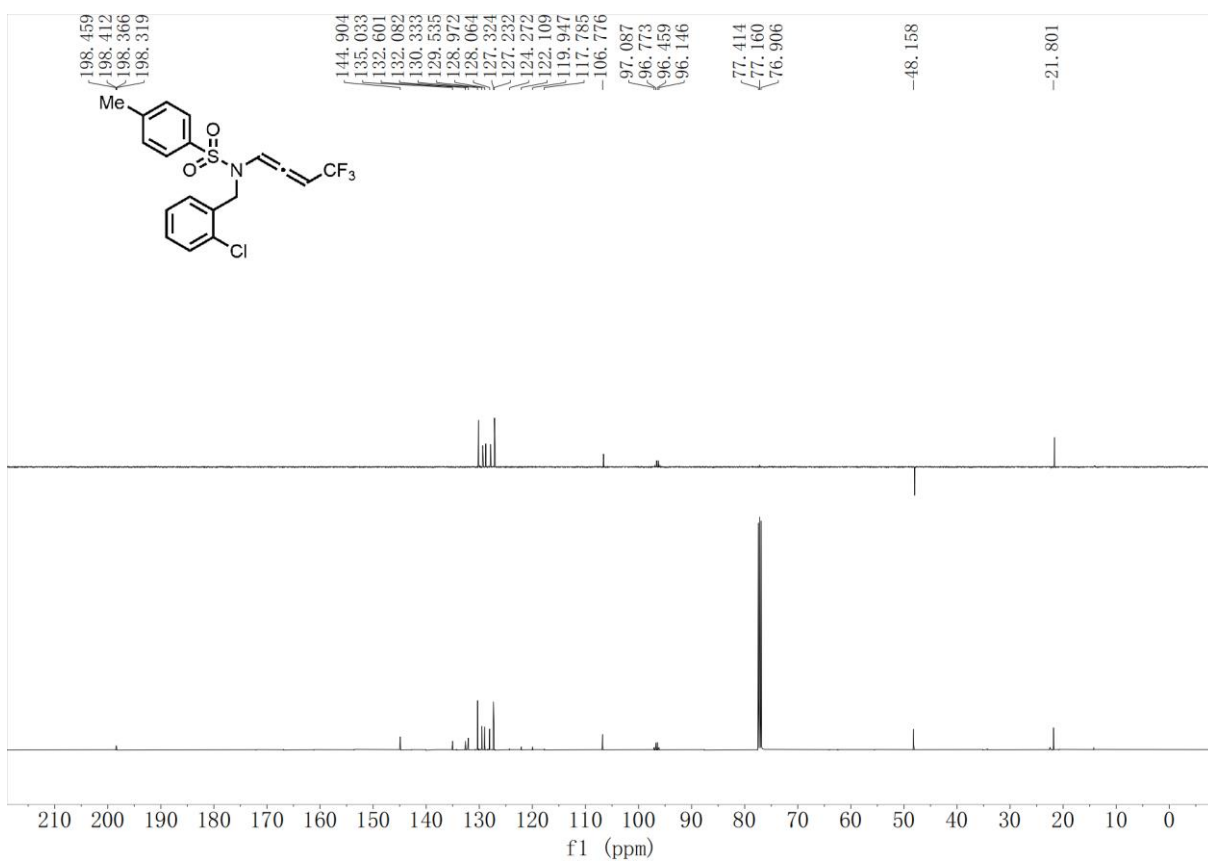

**1k** –  $^{19}\text{F}$  NMR (282 MHz,  $\text{CDCl}_3$ )

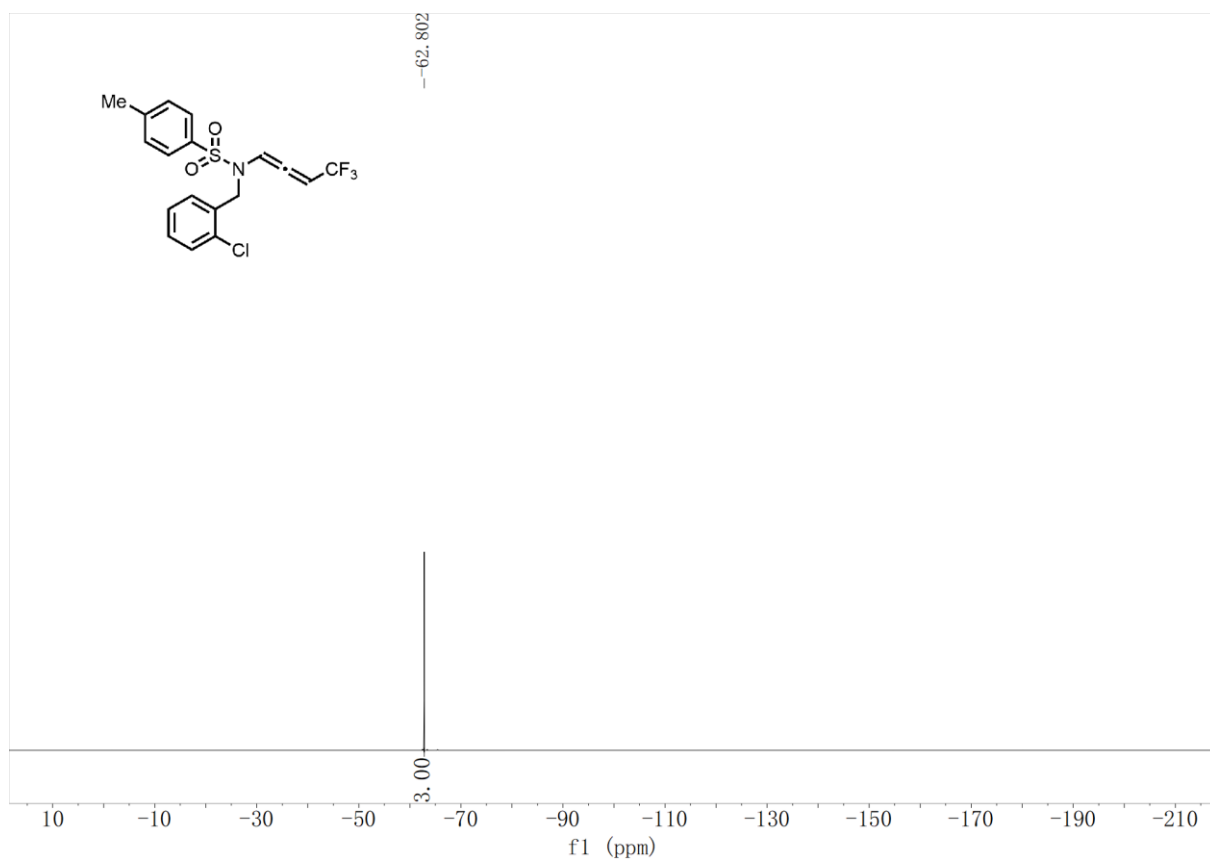

**1n** – <sup>1</sup>H NMR (300 MHz, CDCl<sub>3</sub>)

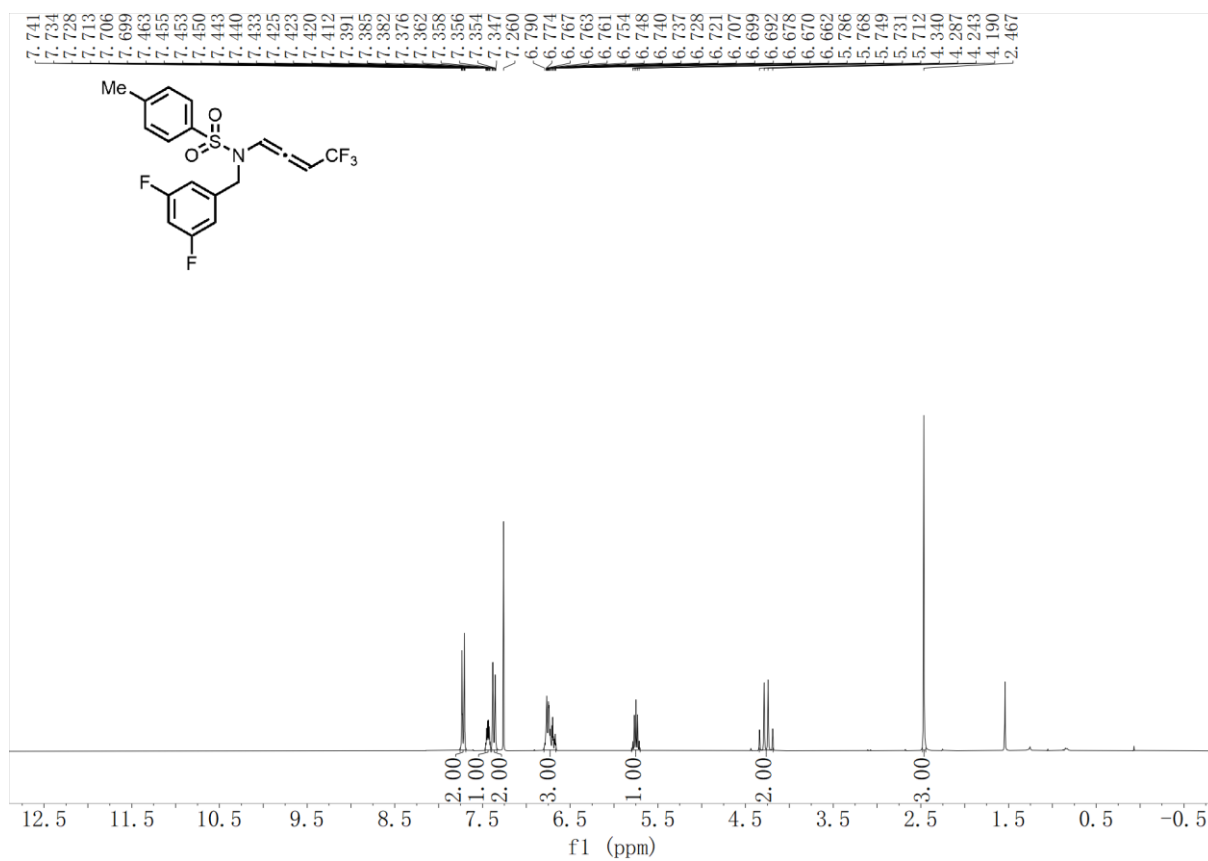

**1n** – <sup>13</sup>C NMR (126 MHz, CDCl<sub>3</sub>)

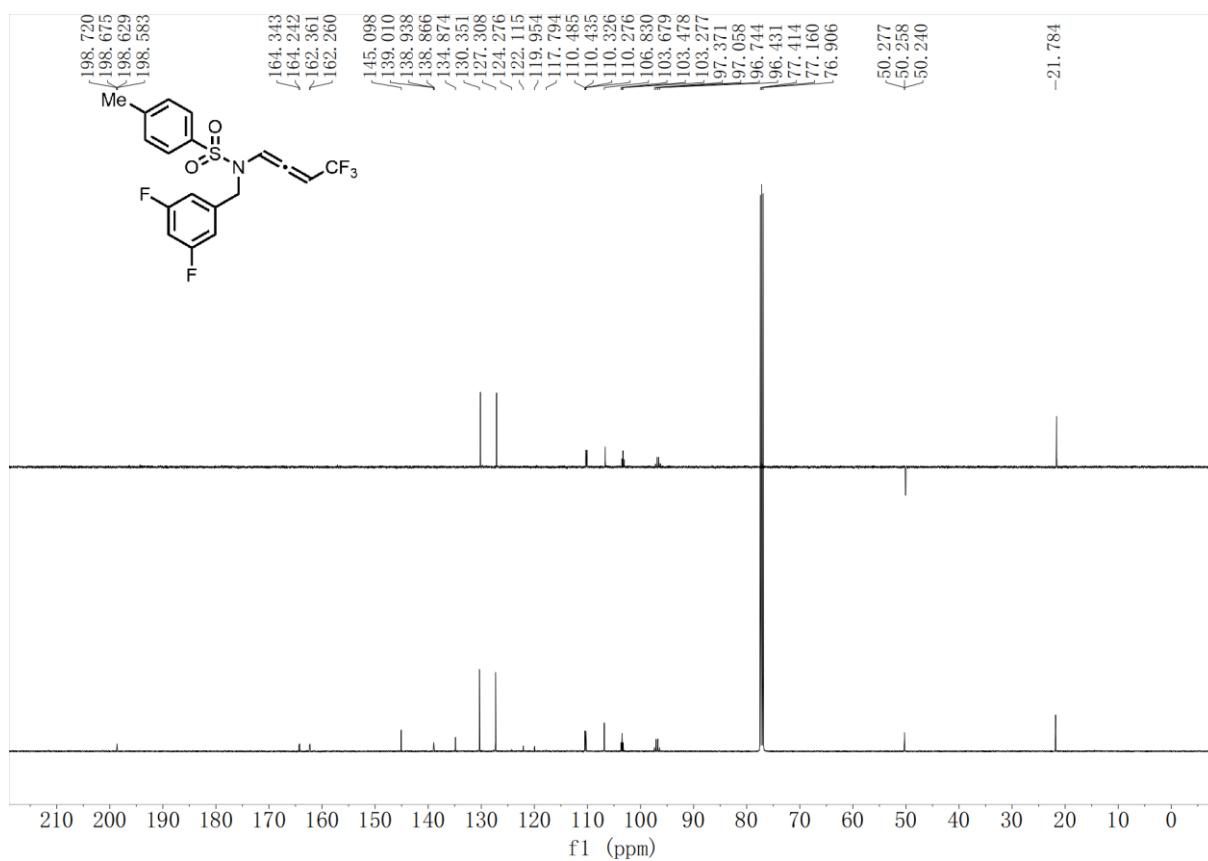

**1n** –  $^{19}\text{F}$  NMR (282 MHz,  $\text{CDCl}_3$ )

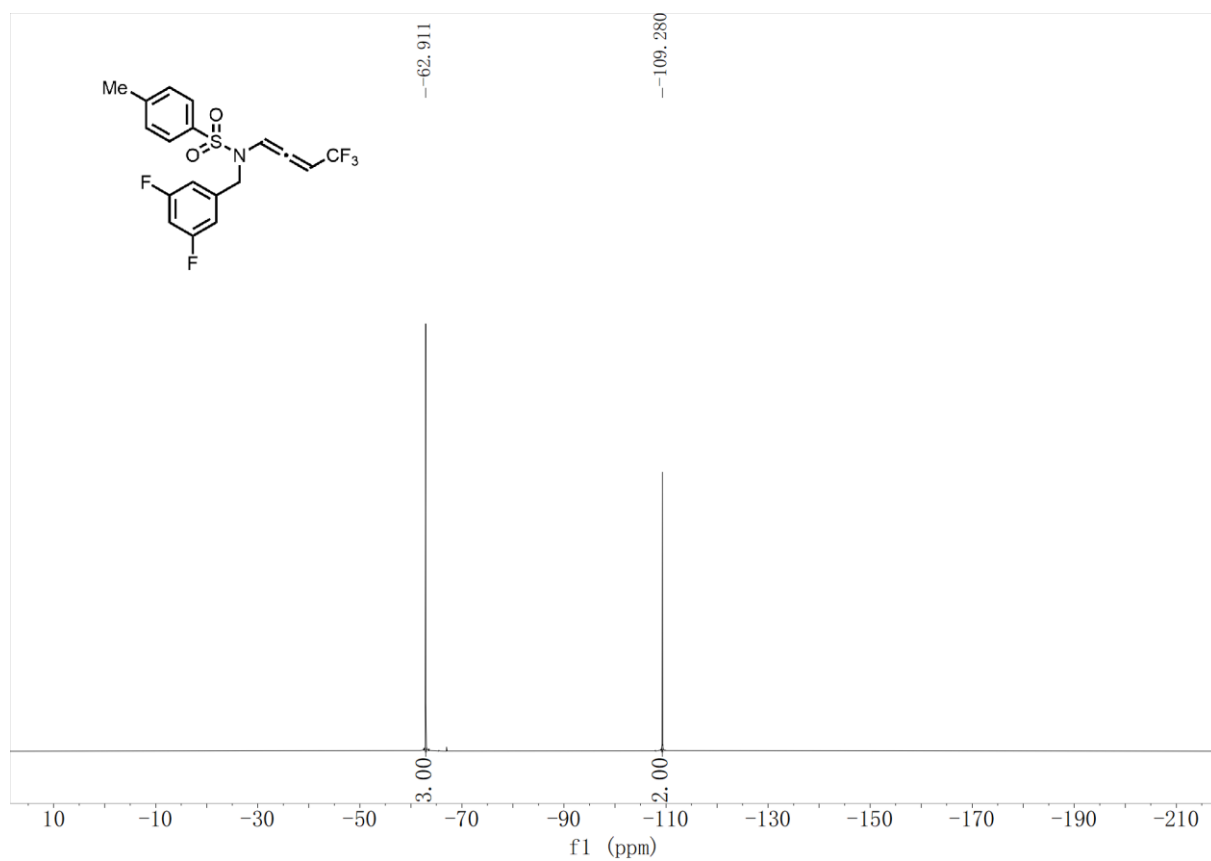

**1o** – <sup>1</sup>H NMR (500 MHz, CDCl<sub>3</sub>)

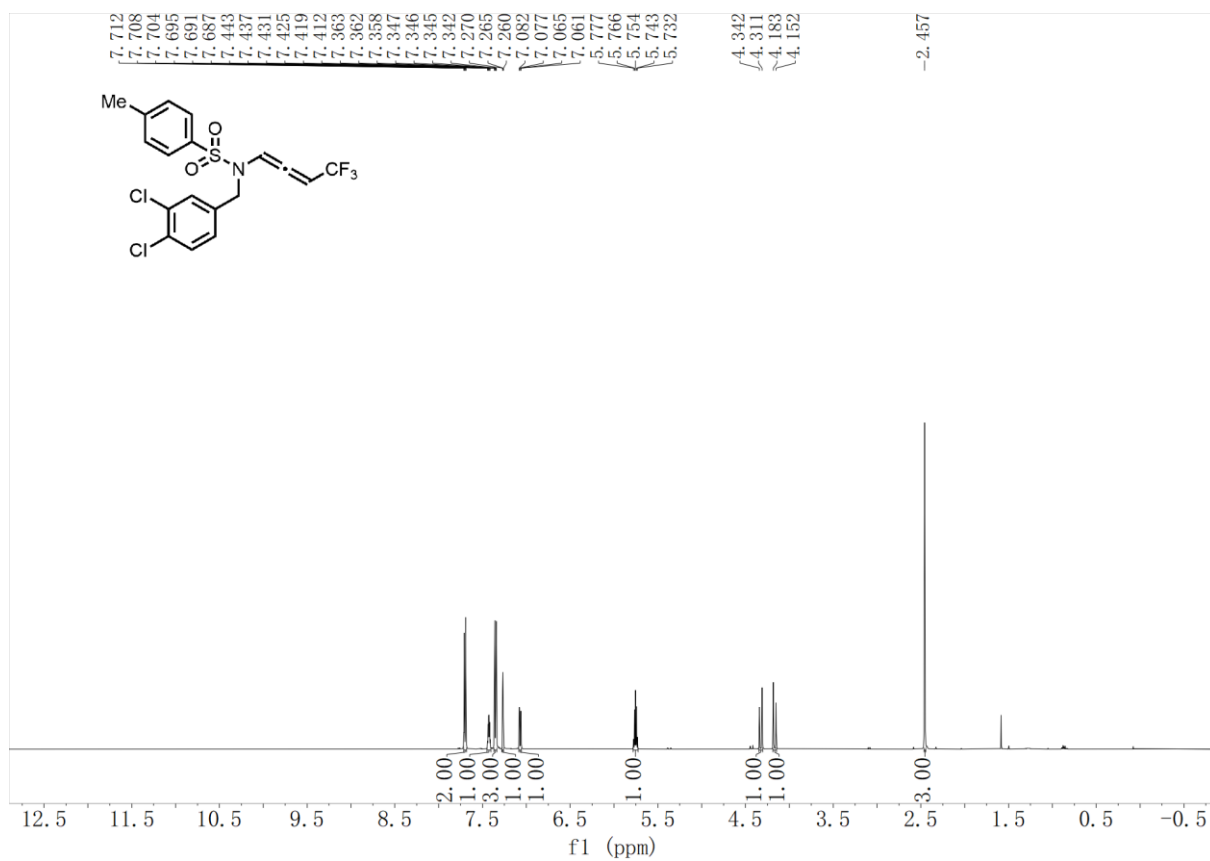

**1o** – <sup>13</sup>C NMR (126 MHz, CDCl<sub>3</sub>)

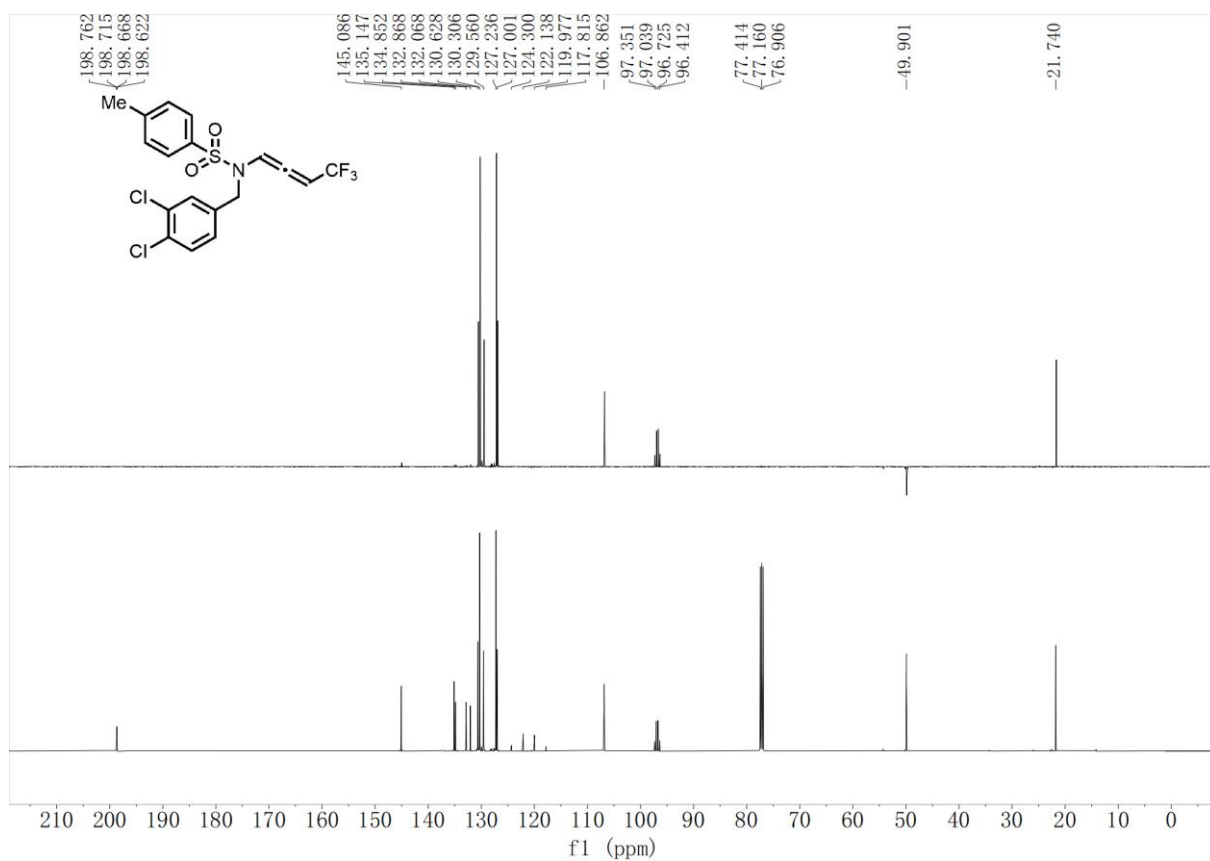



**1o** –  $^{19}\text{F}$  NMR (471 MHz,  $\text{CDCl}_3$ )

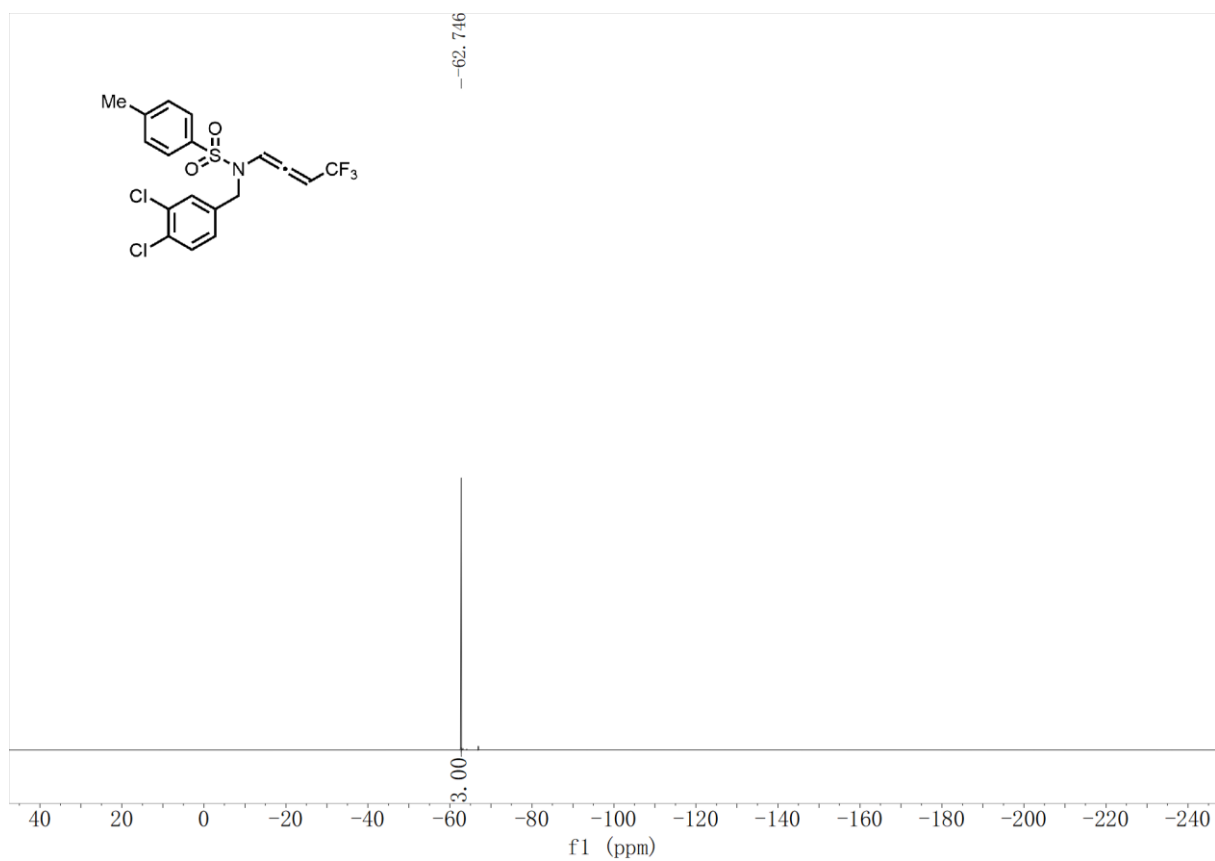

**1q** – <sup>1</sup>H NMR (500 MHz, CDCl<sub>3</sub>)

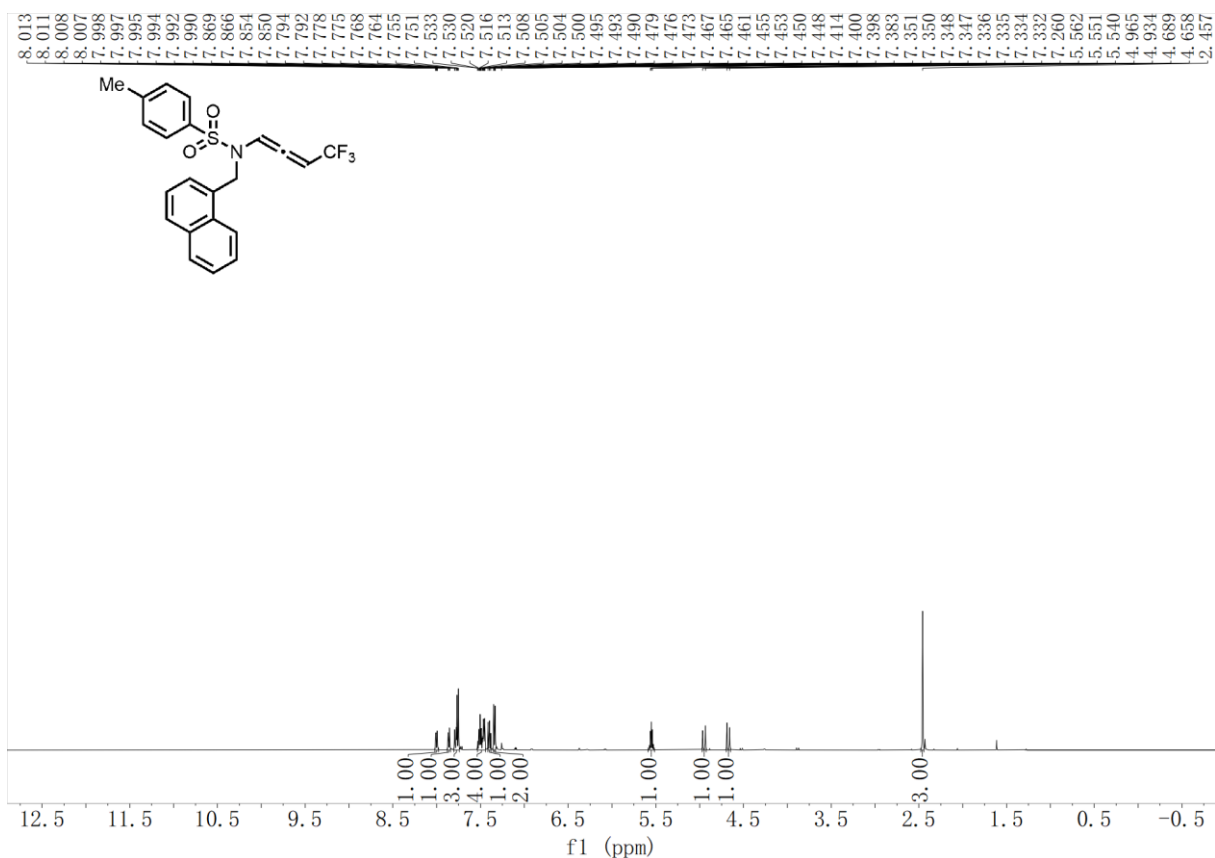

**1q** – <sup>13</sup>C NMR (126 MHz, CDCl<sub>3</sub>)

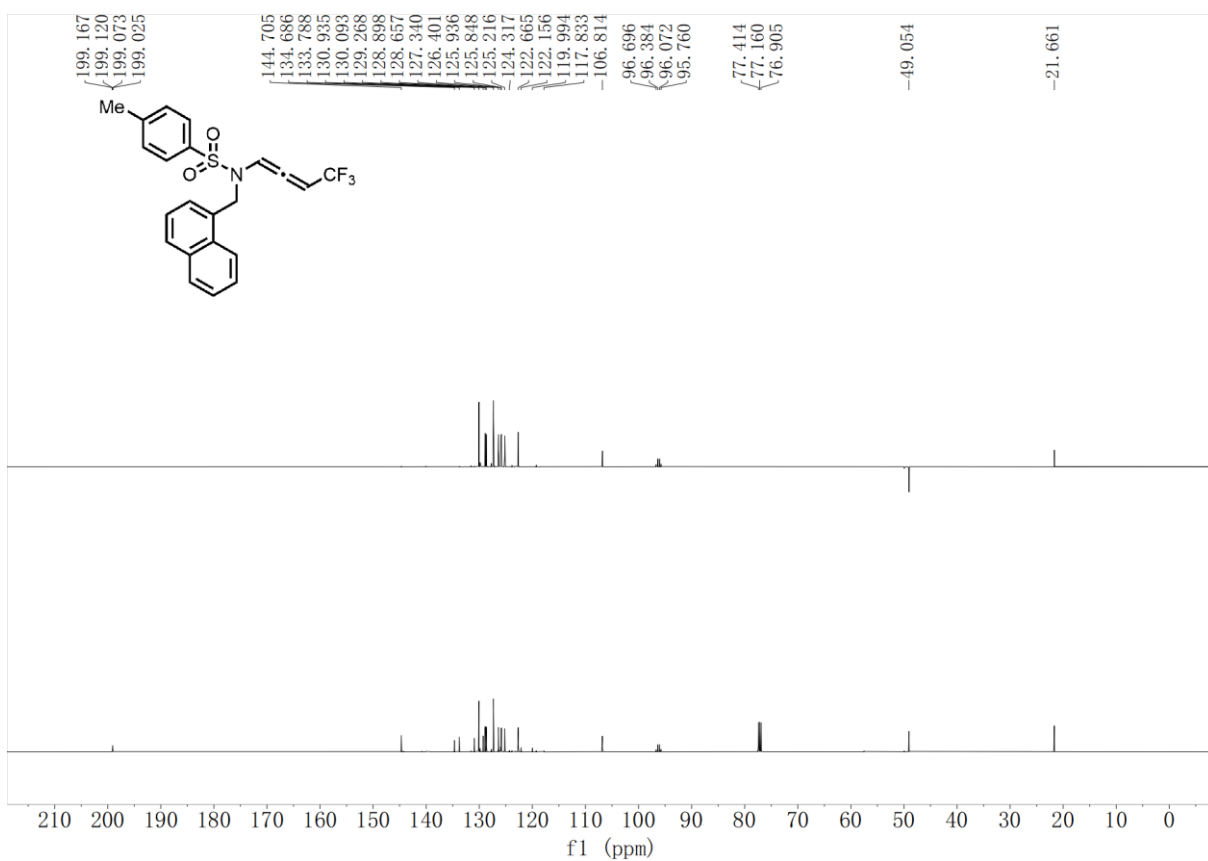

**1q** –  $^{19}\text{F}$  NMR (471 MHz,  $\text{CDCl}_3$ )

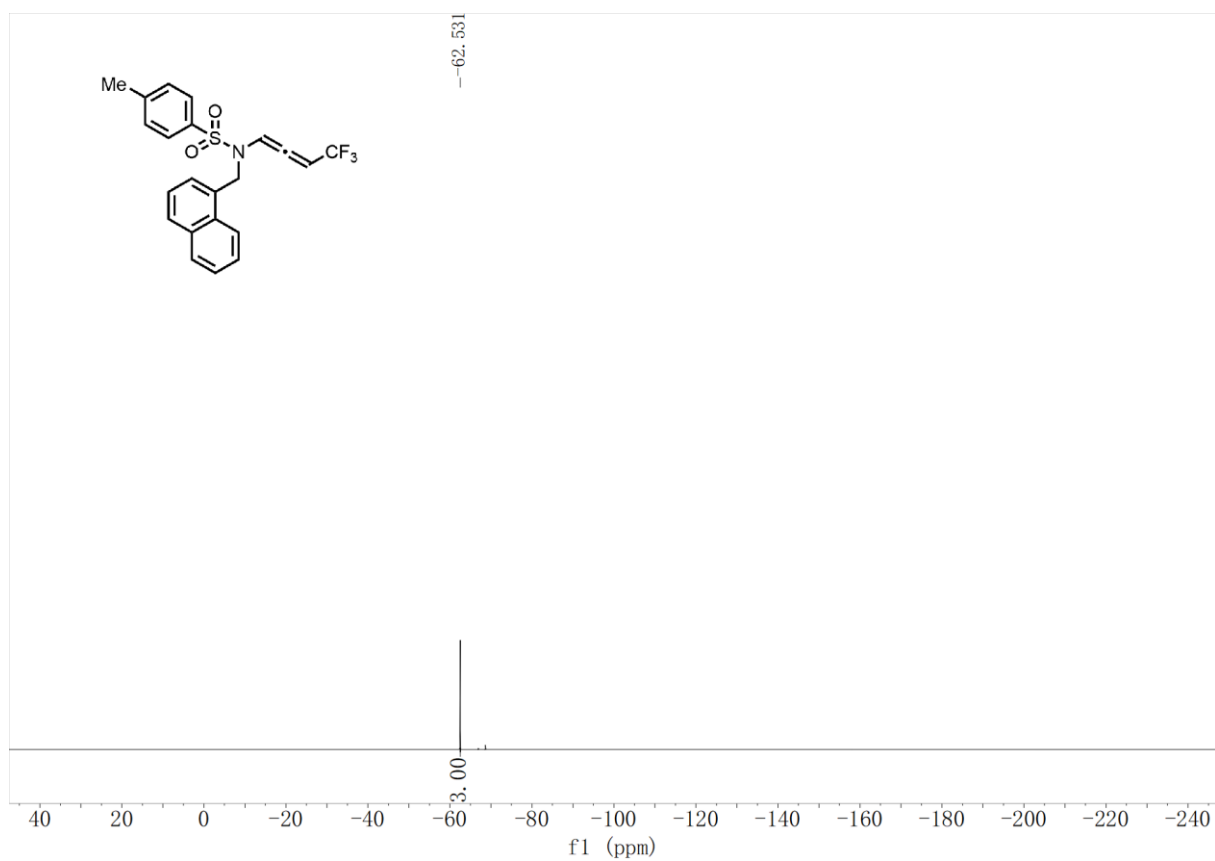

**1t** – <sup>1</sup>H NMR (500 MHz, CDCl<sub>3</sub>)

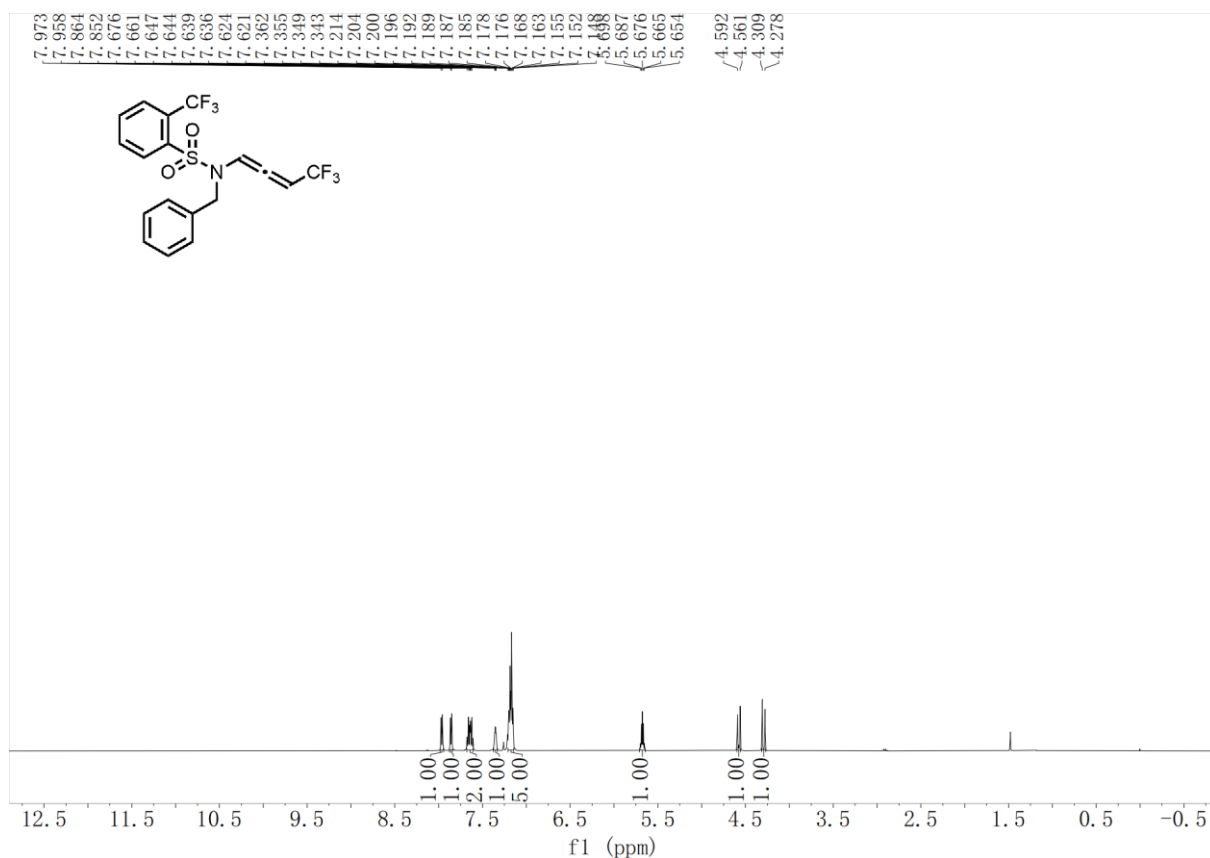

**1t** – <sup>13</sup>C NMR (126 MHz, CDCl<sub>3</sub>)

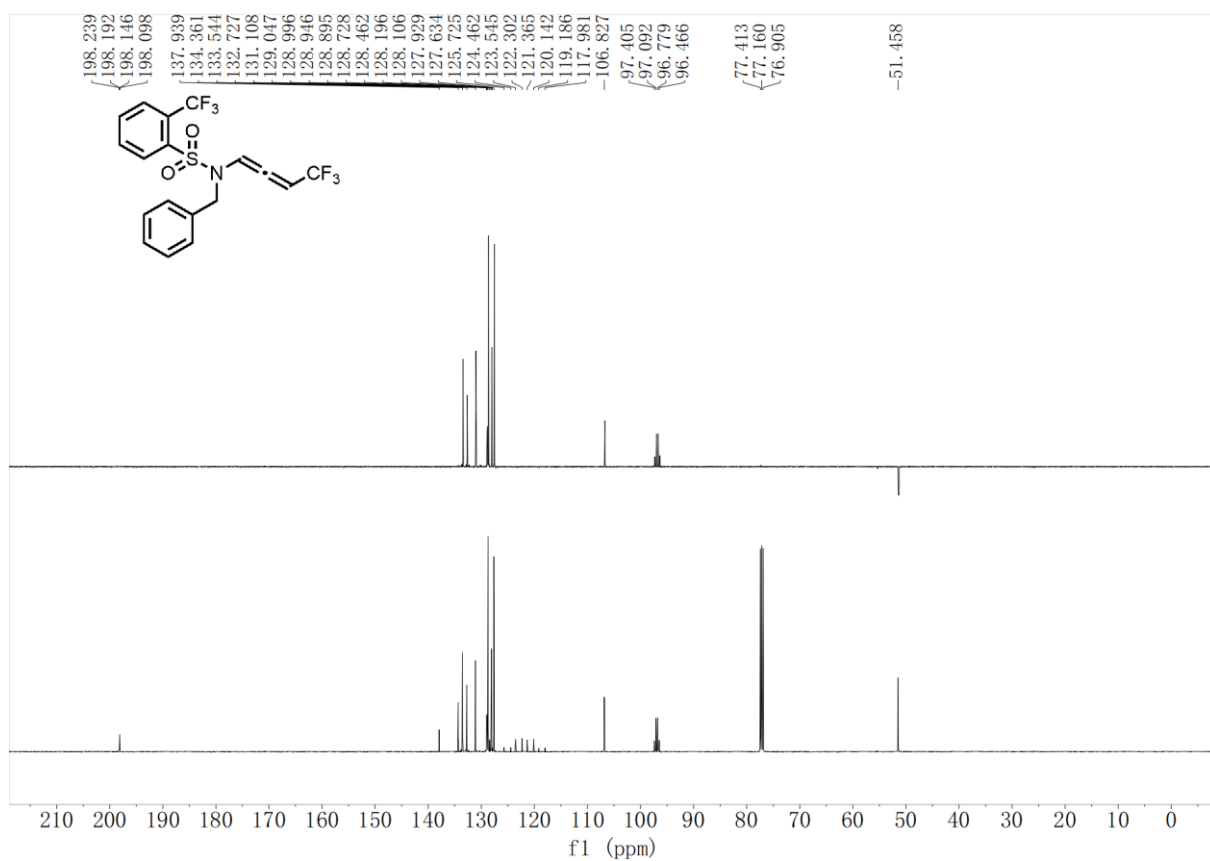

1t – <sup>19</sup>F NMR (282 MHz, CDCl<sub>3</sub>)

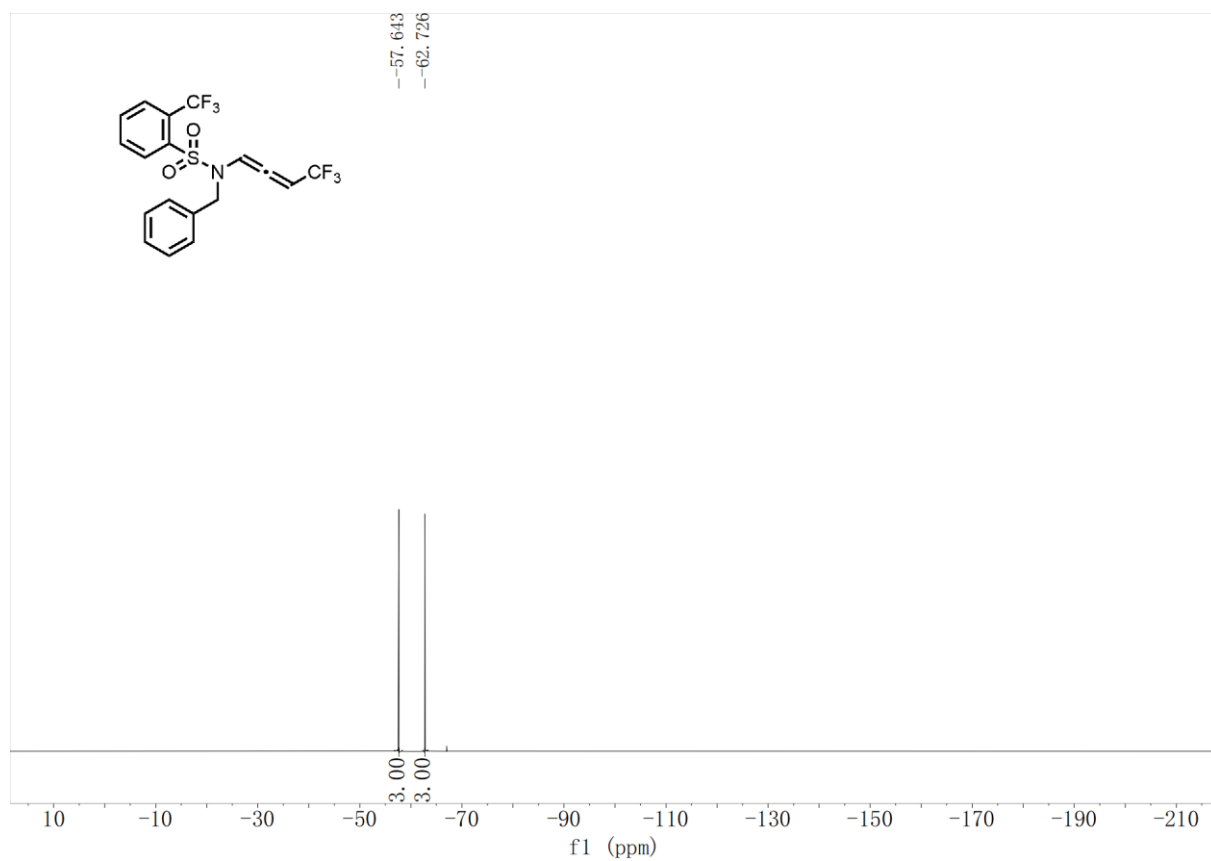

**1u** – <sup>1</sup>H NMR (500 MHz, CDCl<sub>3</sub>)

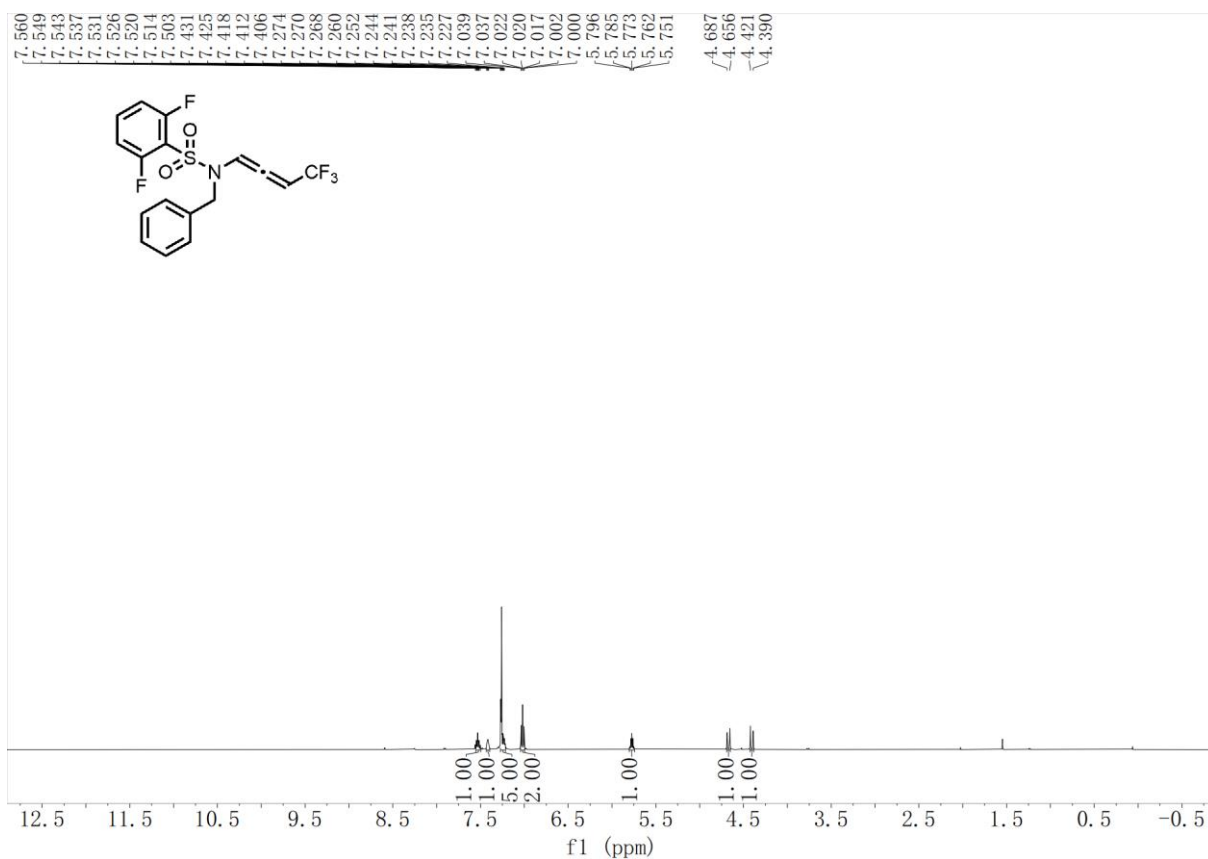

**1u** – <sup>13</sup>C NMR (126 MHz, CDCl<sub>3</sub>)

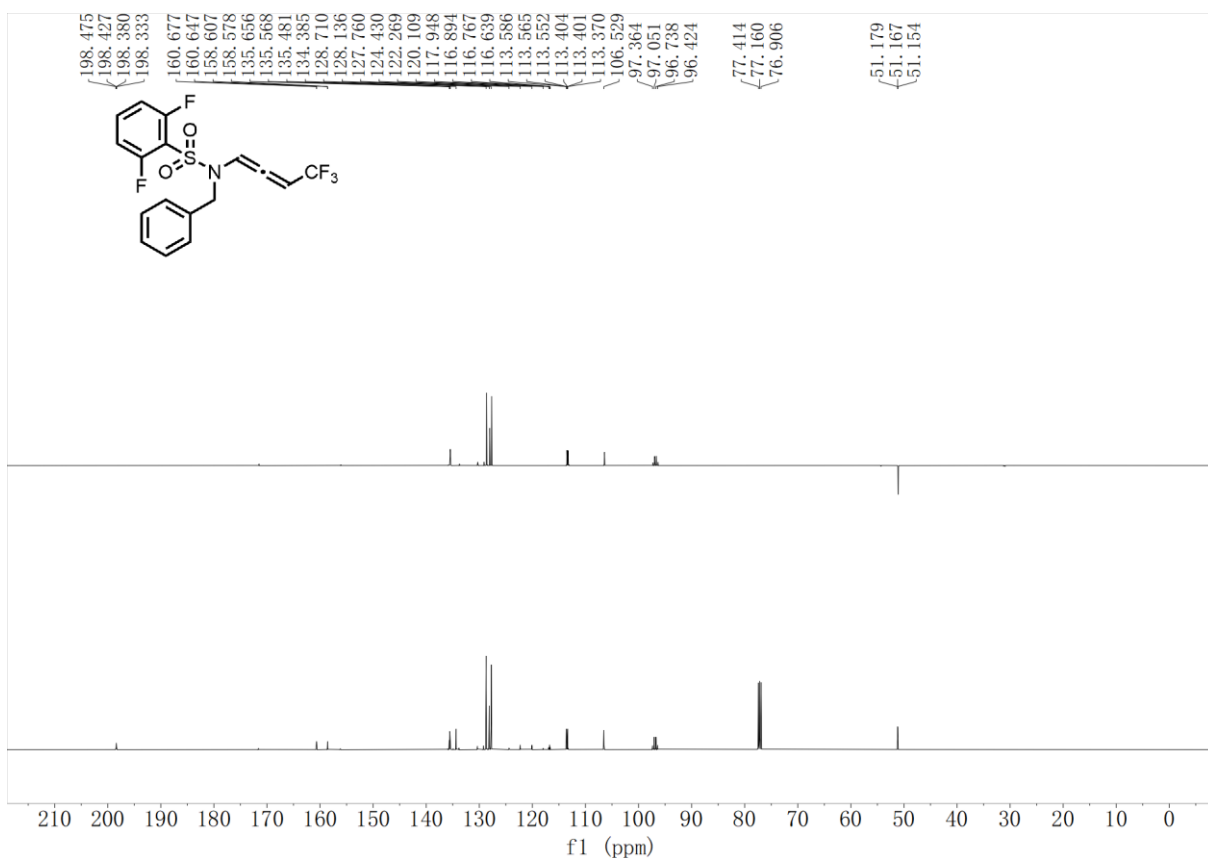

**1u** –  $^{19}\text{F}$  NMR (282 MHz,  $\text{CDCl}_3$ )

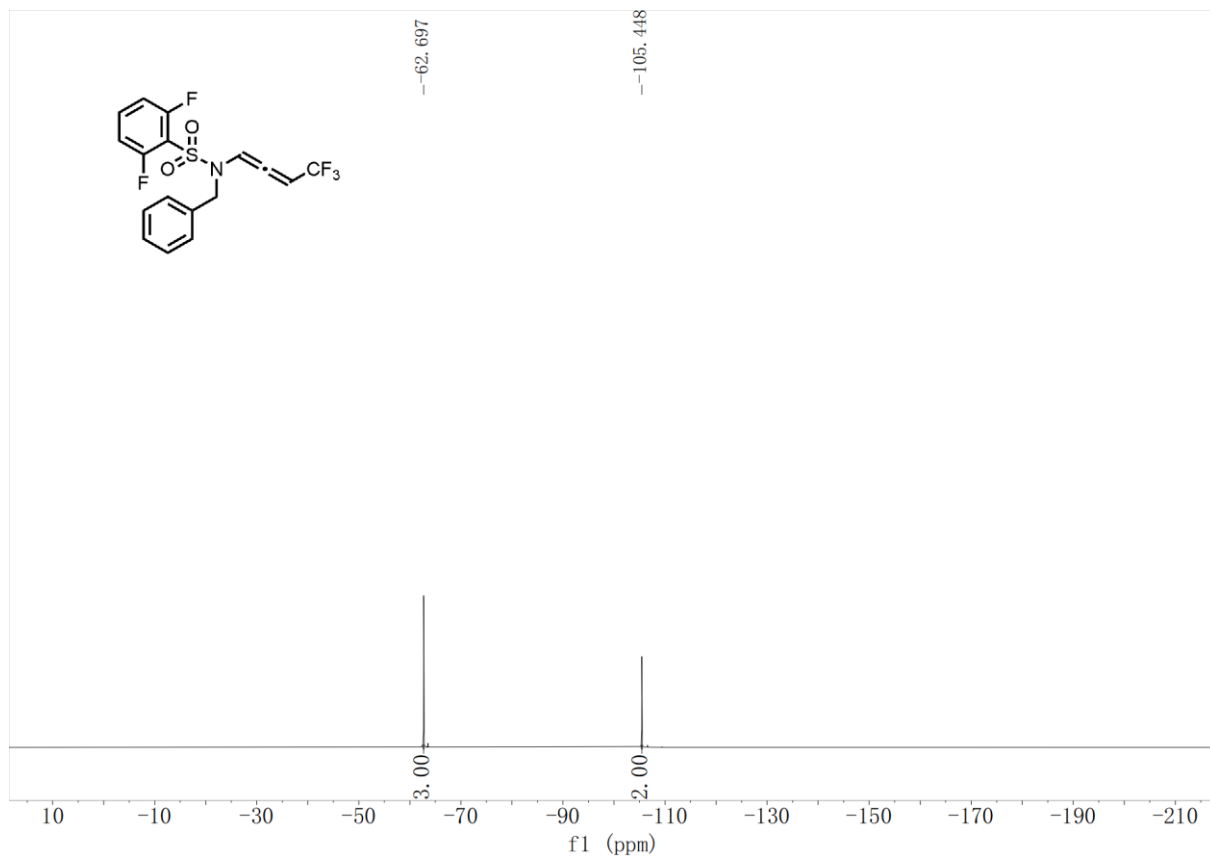

**1v** – <sup>1</sup>H NMR (500 MHz, CDCl<sub>3</sub>)

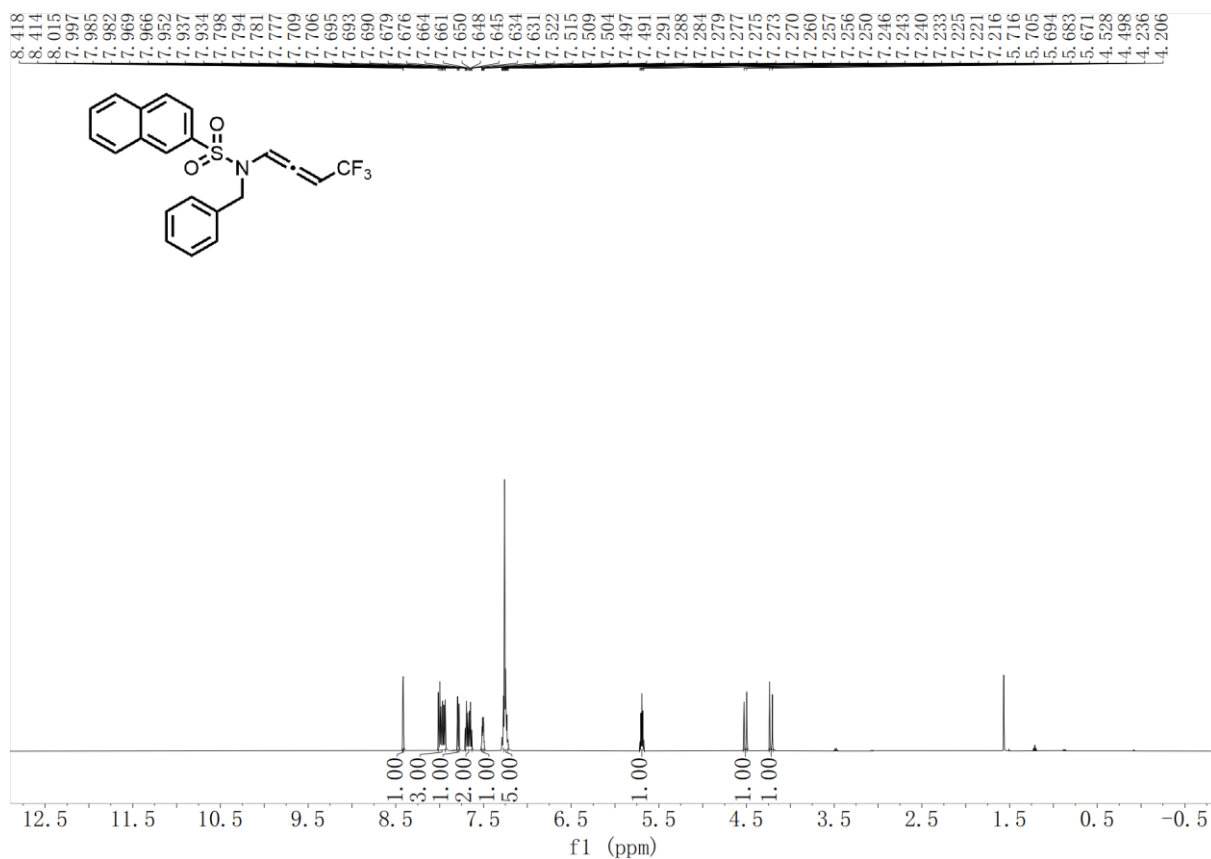

**1v** – <sup>13</sup>C NMR (126 MHz, CDCl<sub>3</sub>)

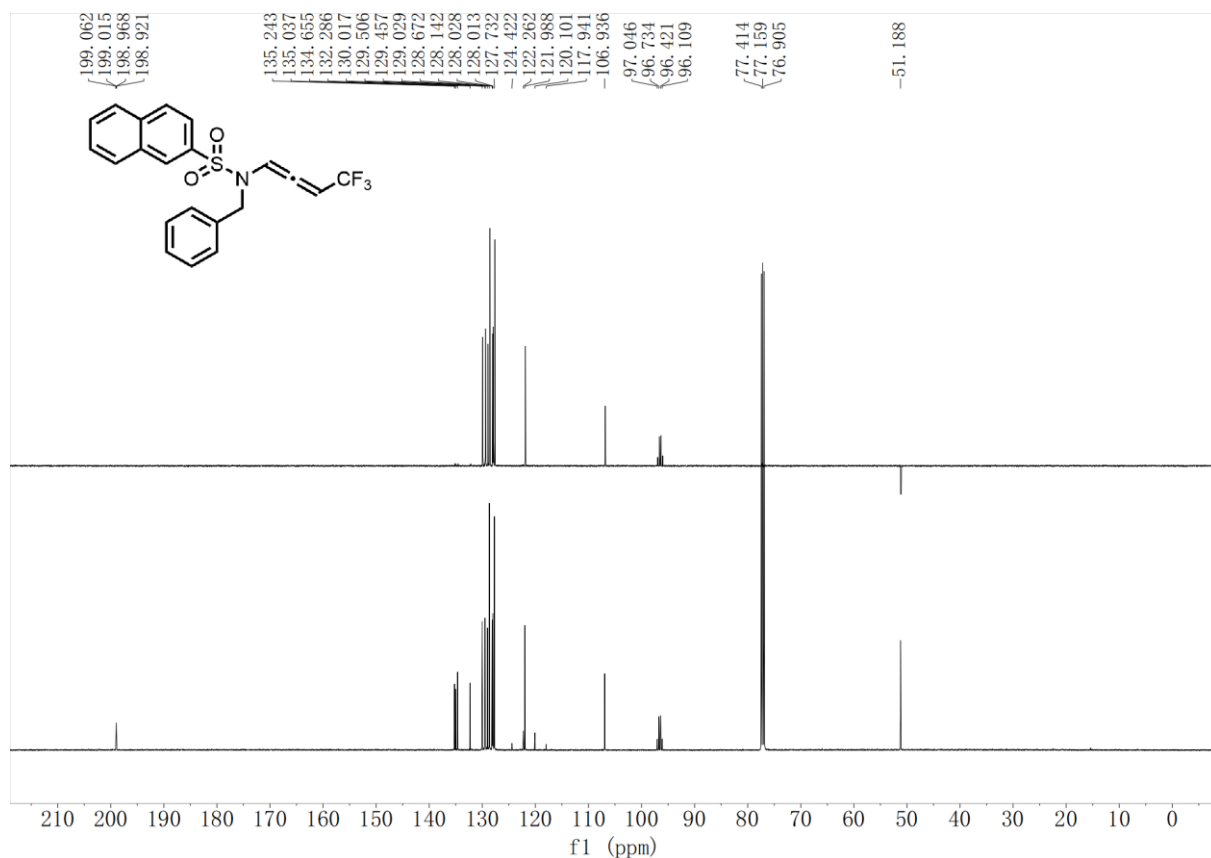



**1v** –  $^{19}\text{F}$  NMR (471 MHz,  $\text{CDCl}_3$ )

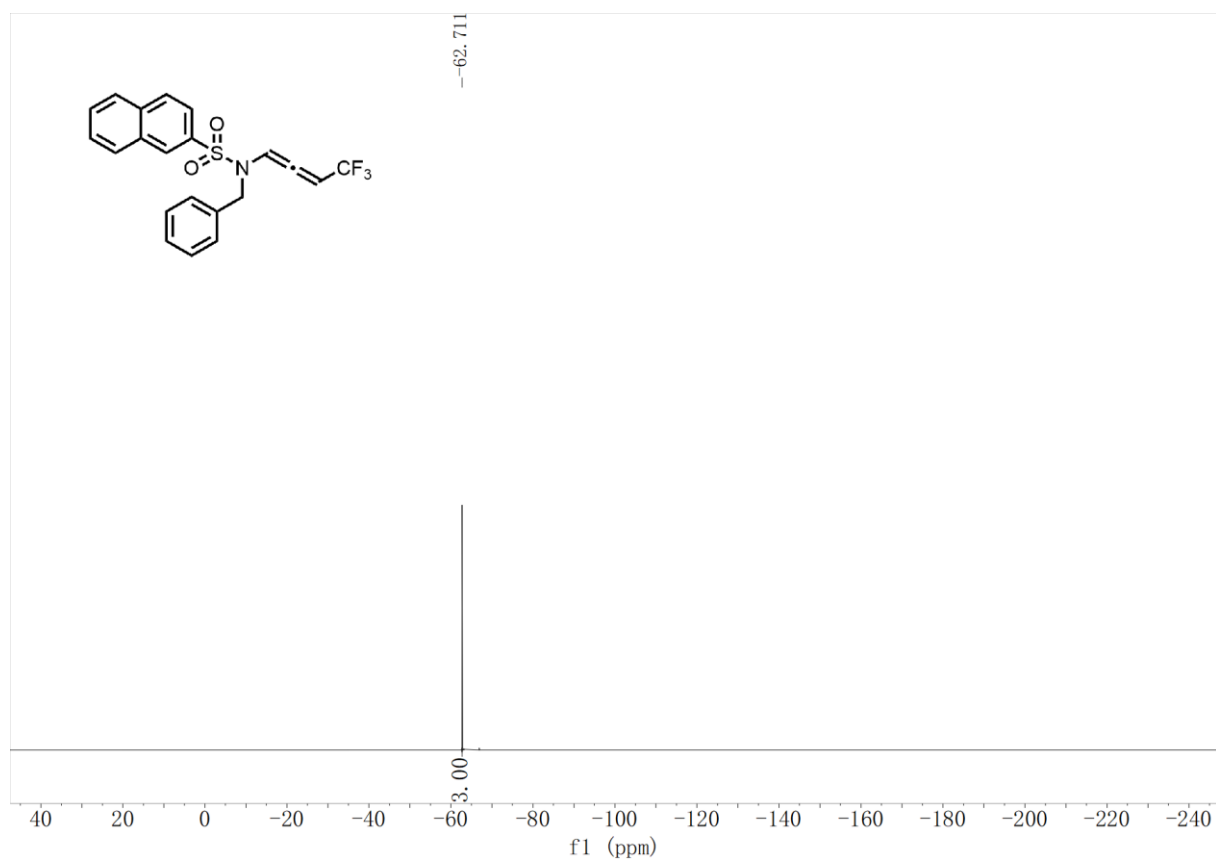

2 – <sup>1</sup>H NMR (500 MHz, DMSO)

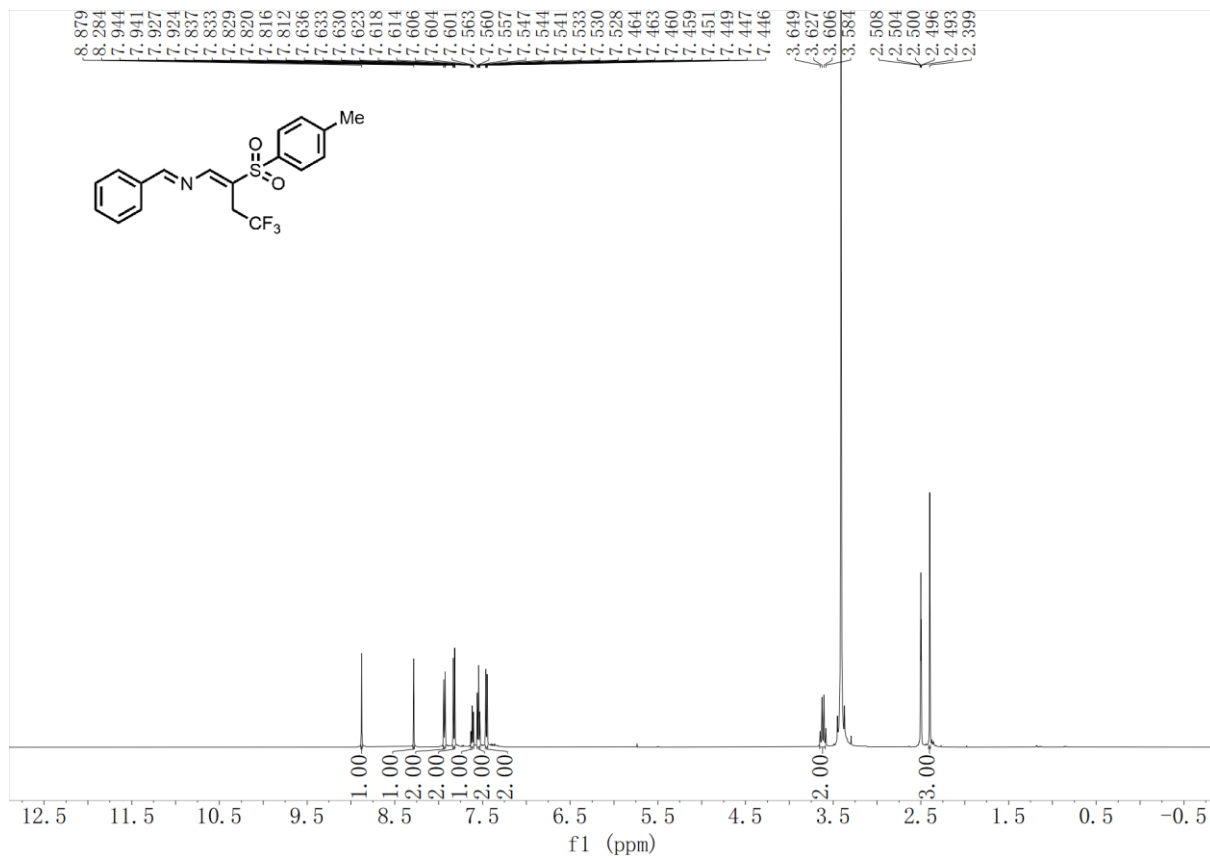

2 – <sup>13</sup>C NMR (126 MHz, DMSO)

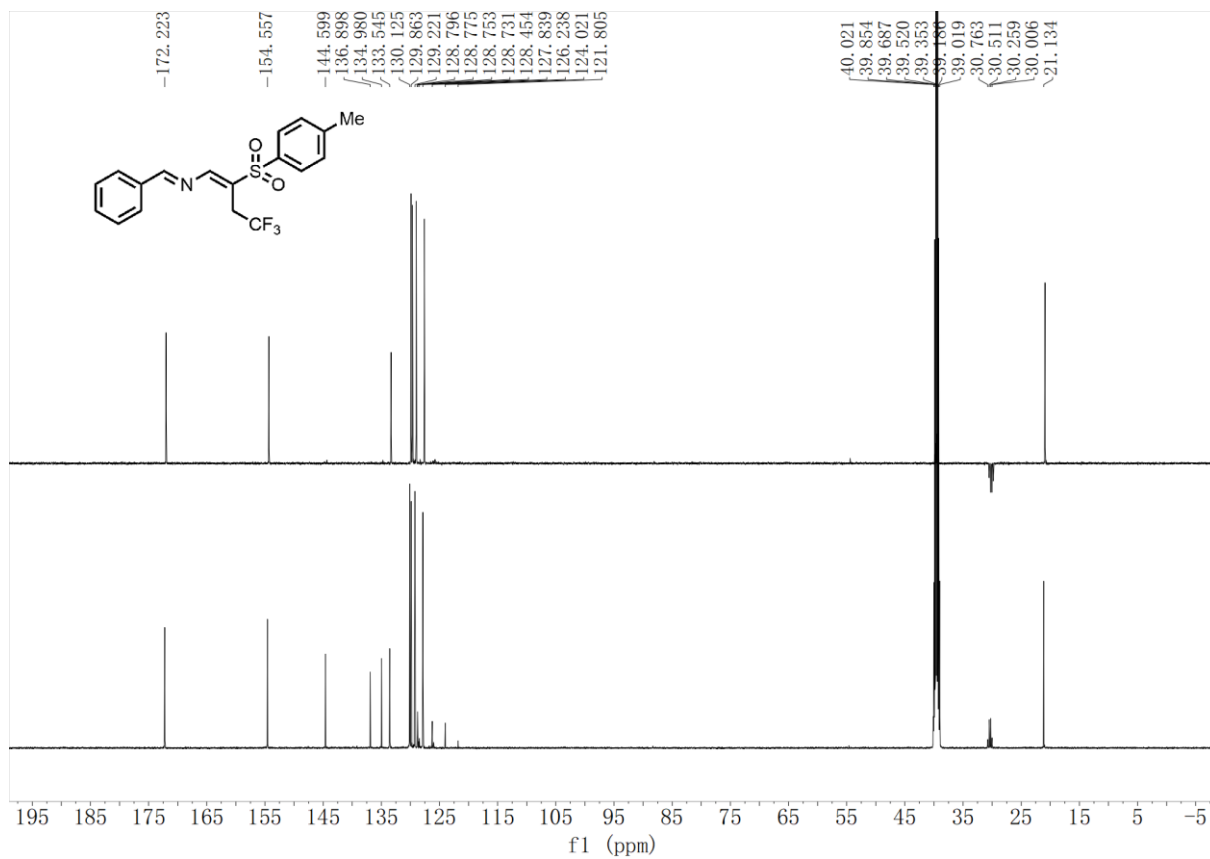

2 – <sup>19</sup>F NMR (282 MHz, DMSO)

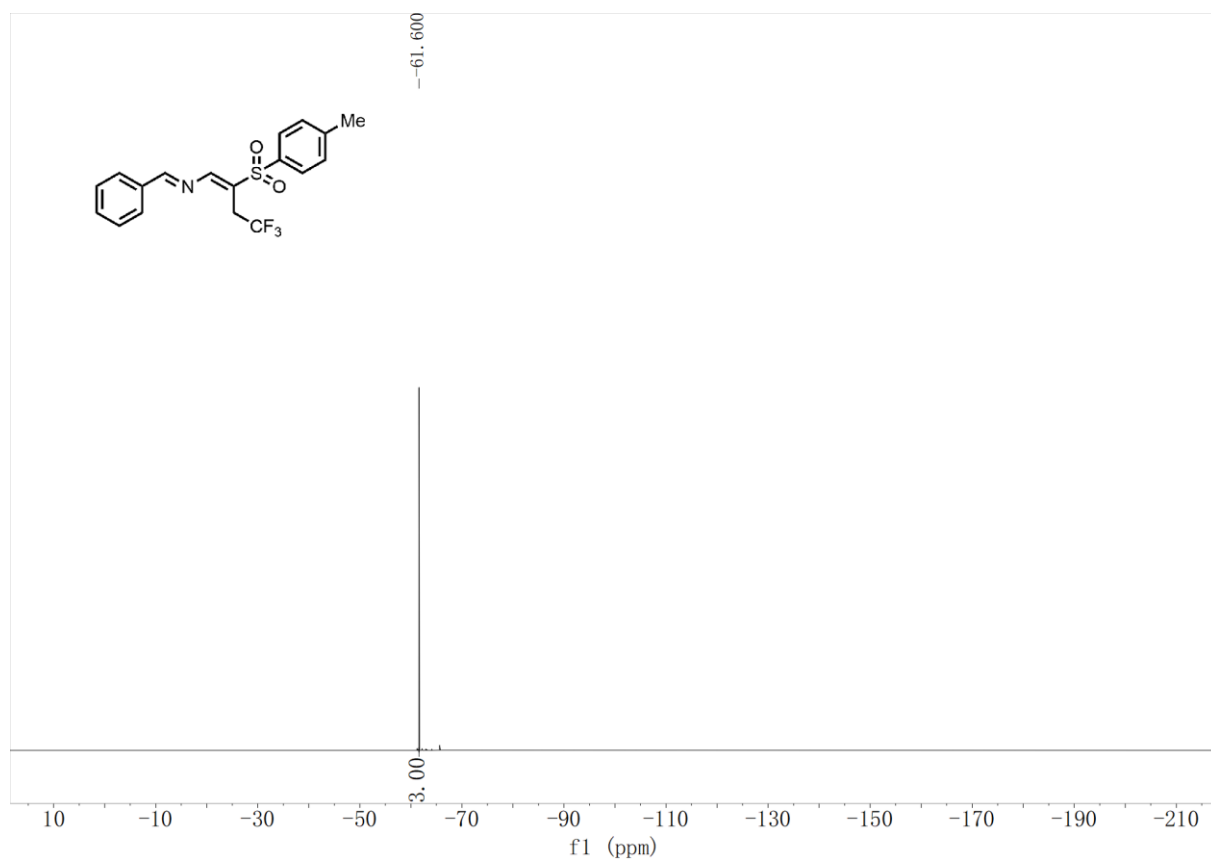

4a – <sup>1</sup>H NMR (500 MHz, DMSO)

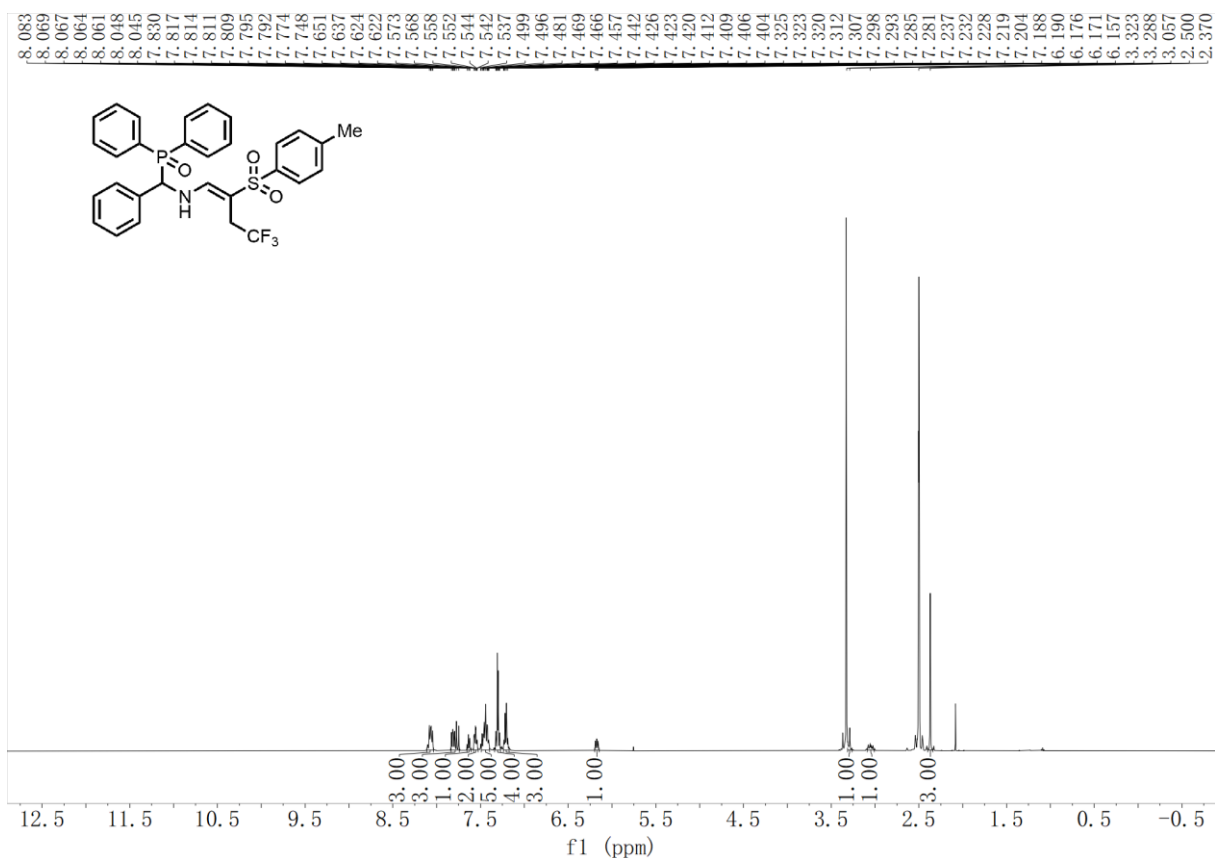

4a – <sup>13</sup>C NMR (126 MHz, DMSO)

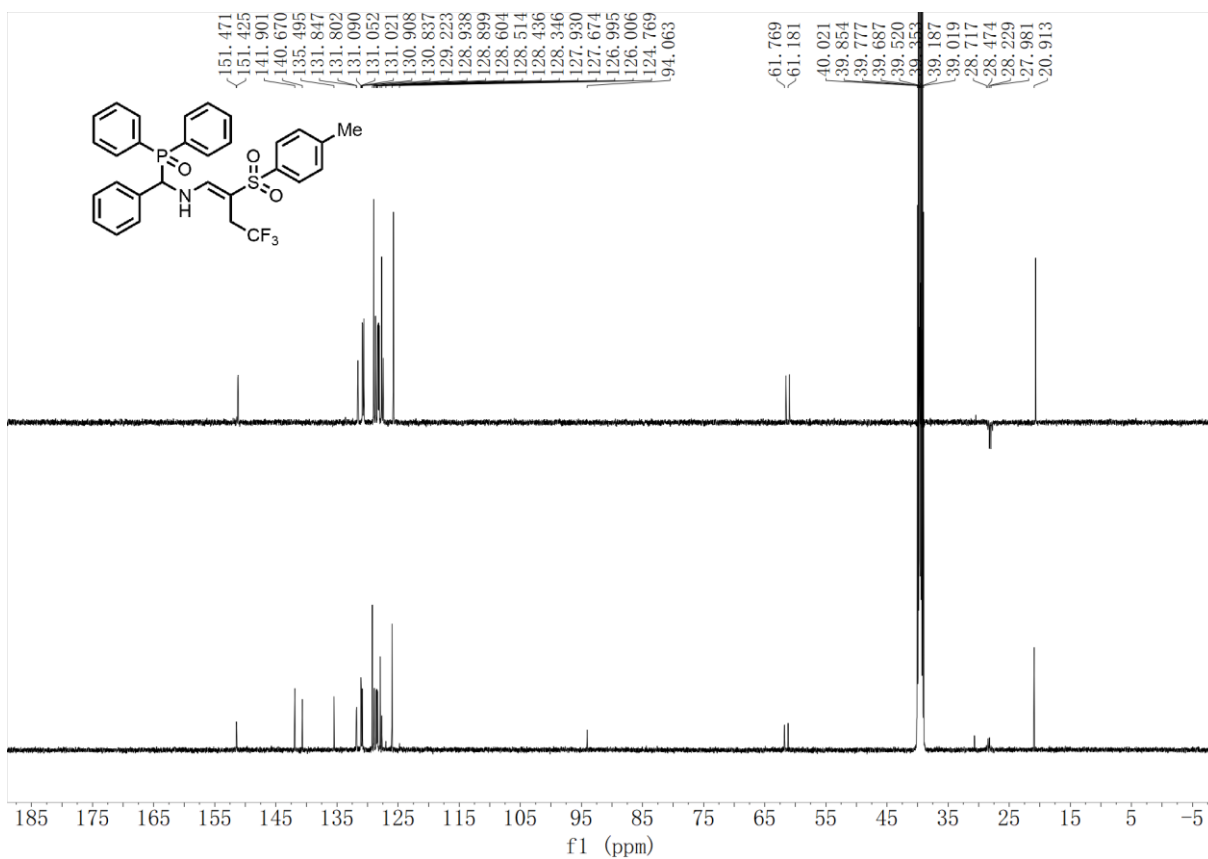

**4a** –  $^{19}\text{F}$  NMR (471 MHz, DMSO)

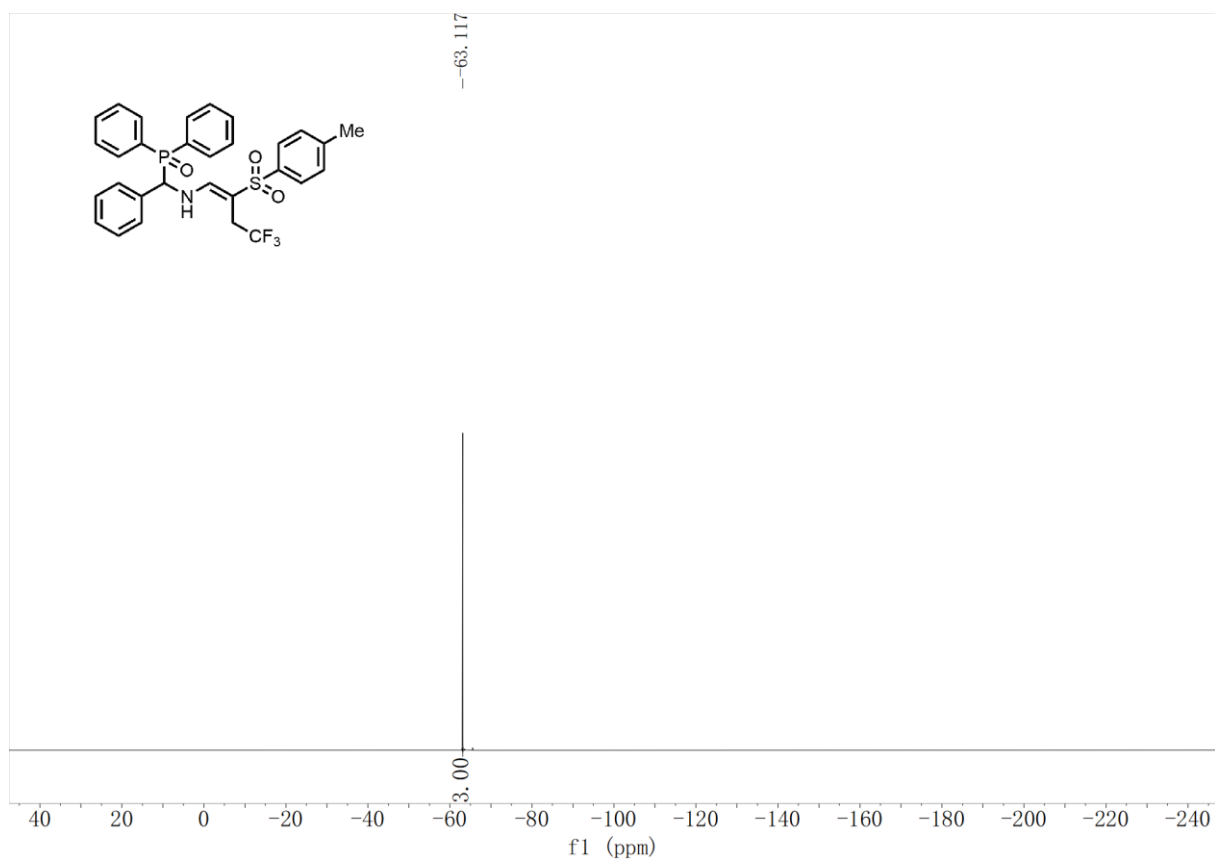

**4a** –  $^{31}\text{P}$  NMR (202 MHz, DMSO)

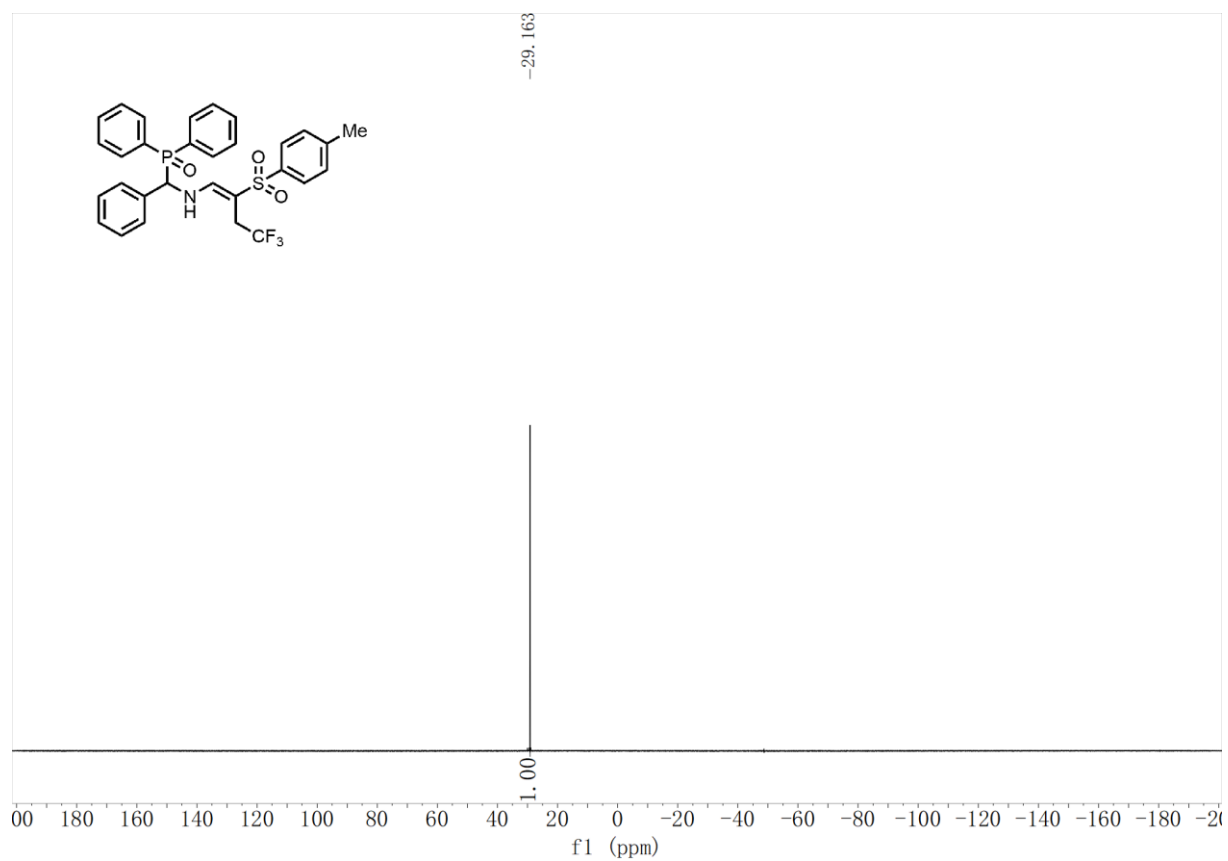

**4b** – <sup>1</sup>H NMR (500 MHz, DMSO)

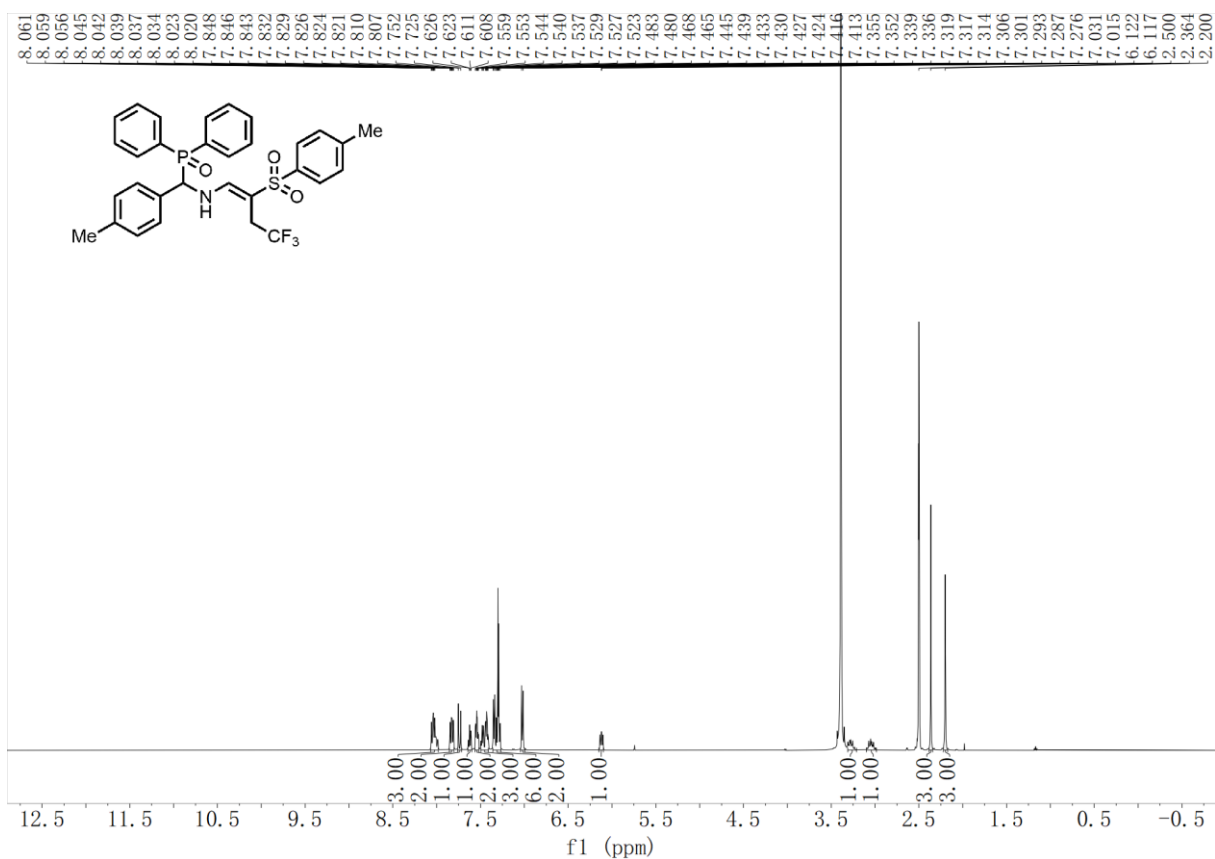

**4b** – <sup>13</sup>C NMR (126 MHz, DMSO)

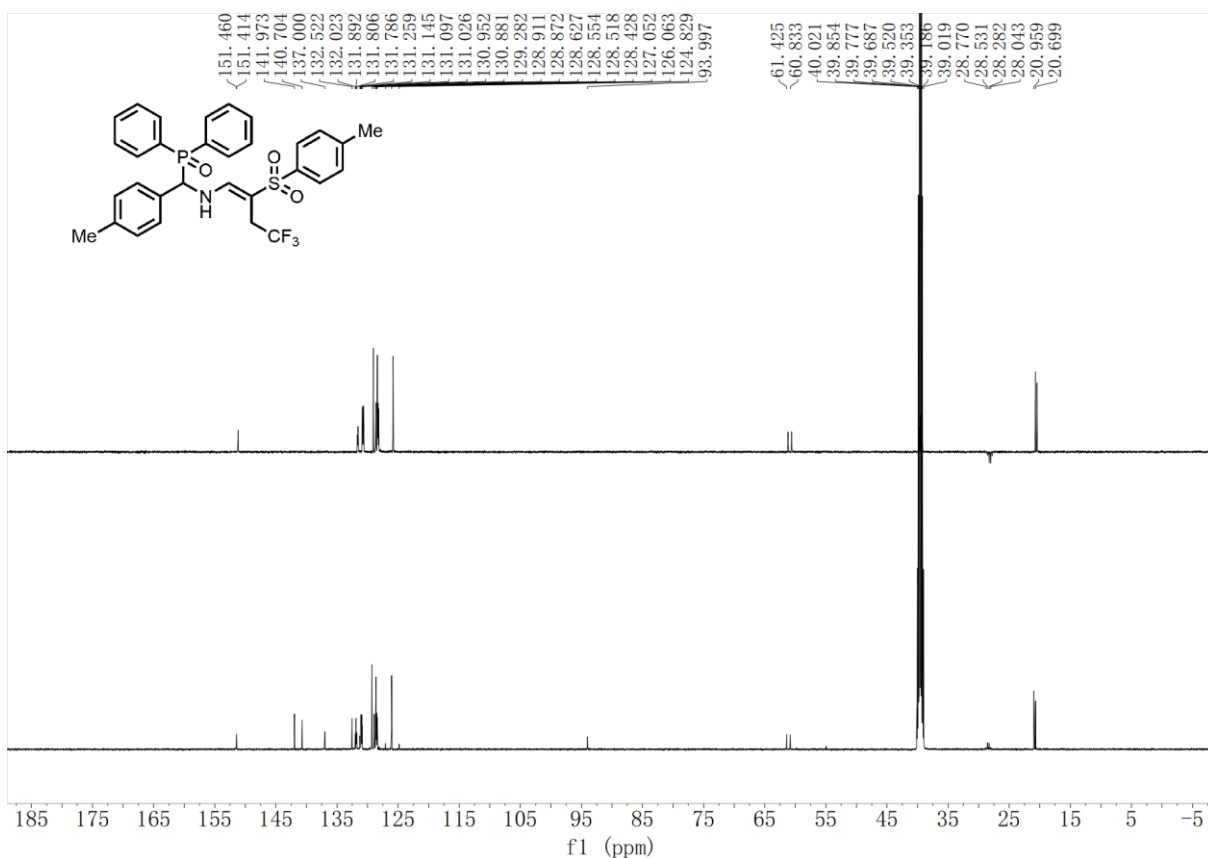

**4b** –  $^{19}\text{F}$  NMR (282 MHz, DMSO)

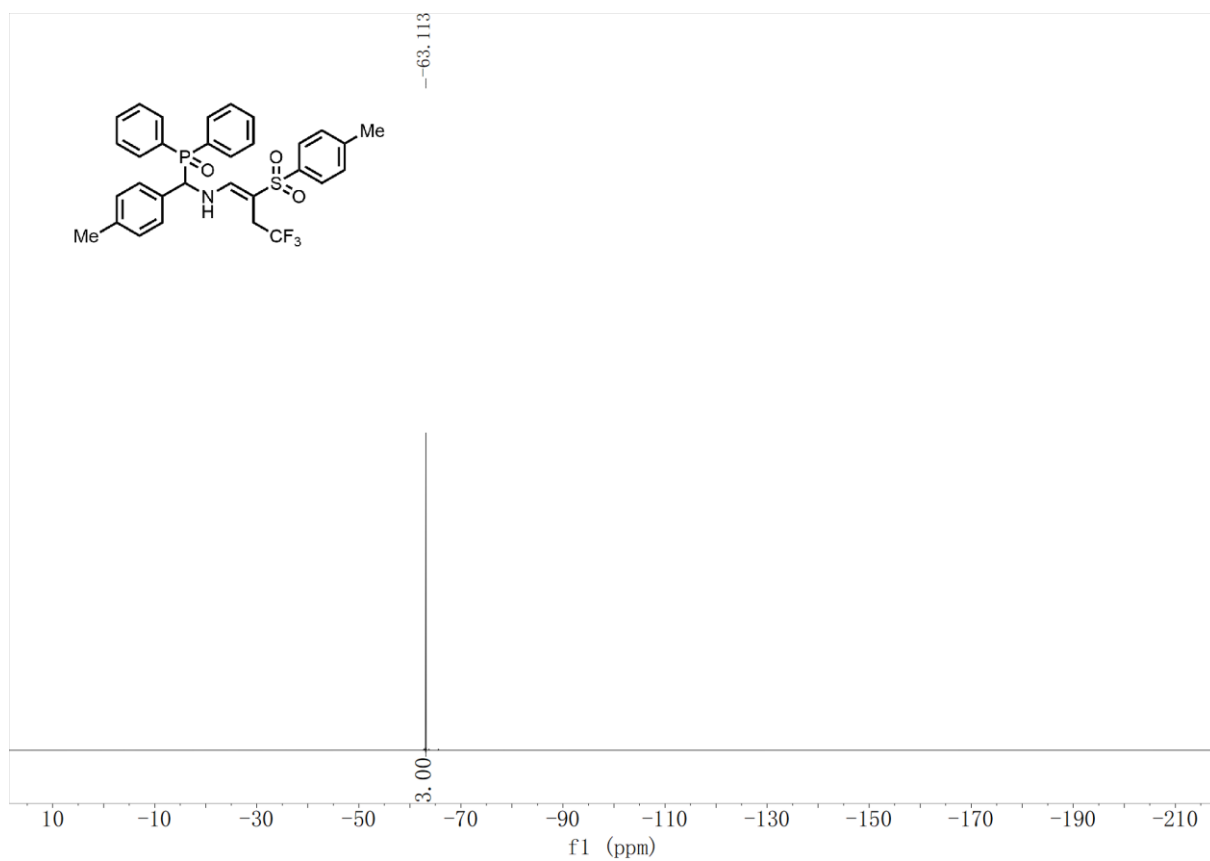

**4b** –  $^{31}\text{P}$  NMR (121 MHz, DMSO)

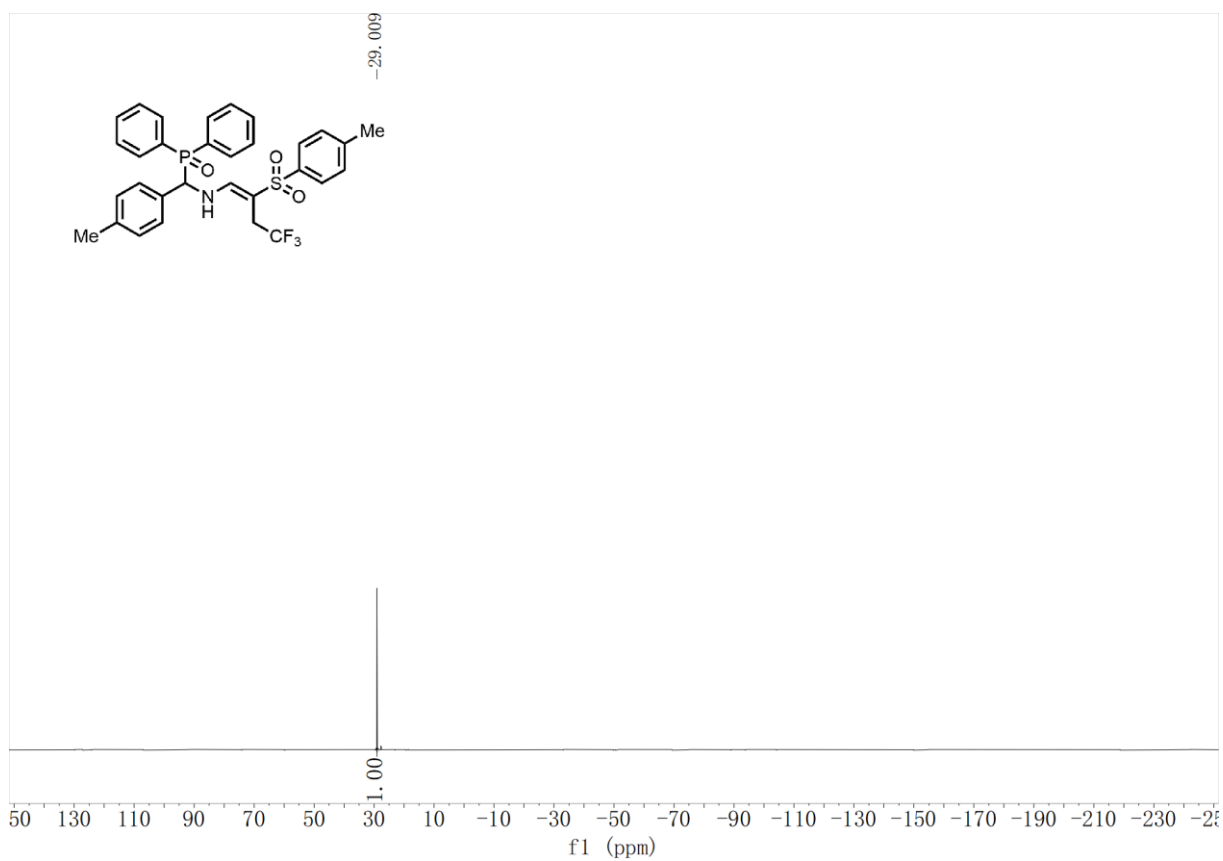

**4c** – <sup>1</sup>H NMR (500 MHz, DMSO)

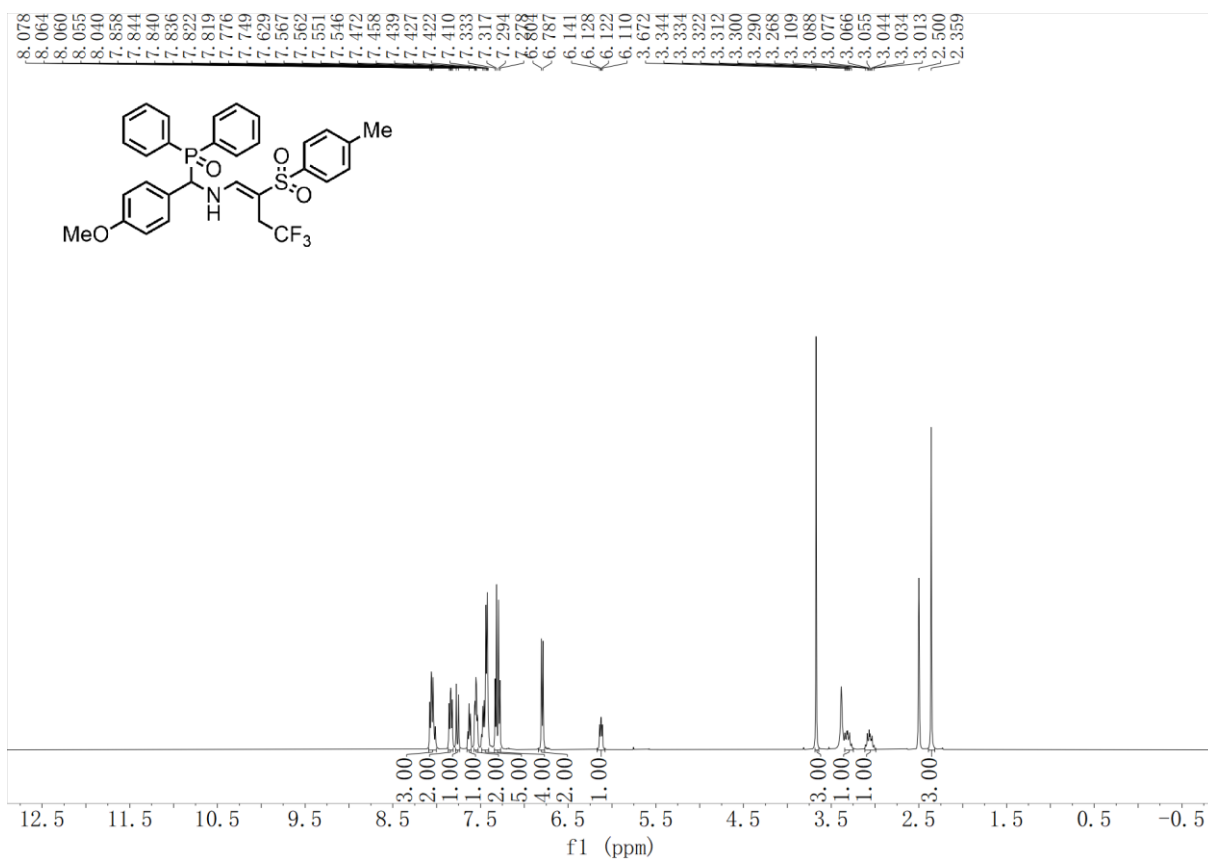

**4c** – <sup>13</sup>C NMR (126 MHz, DMSO)

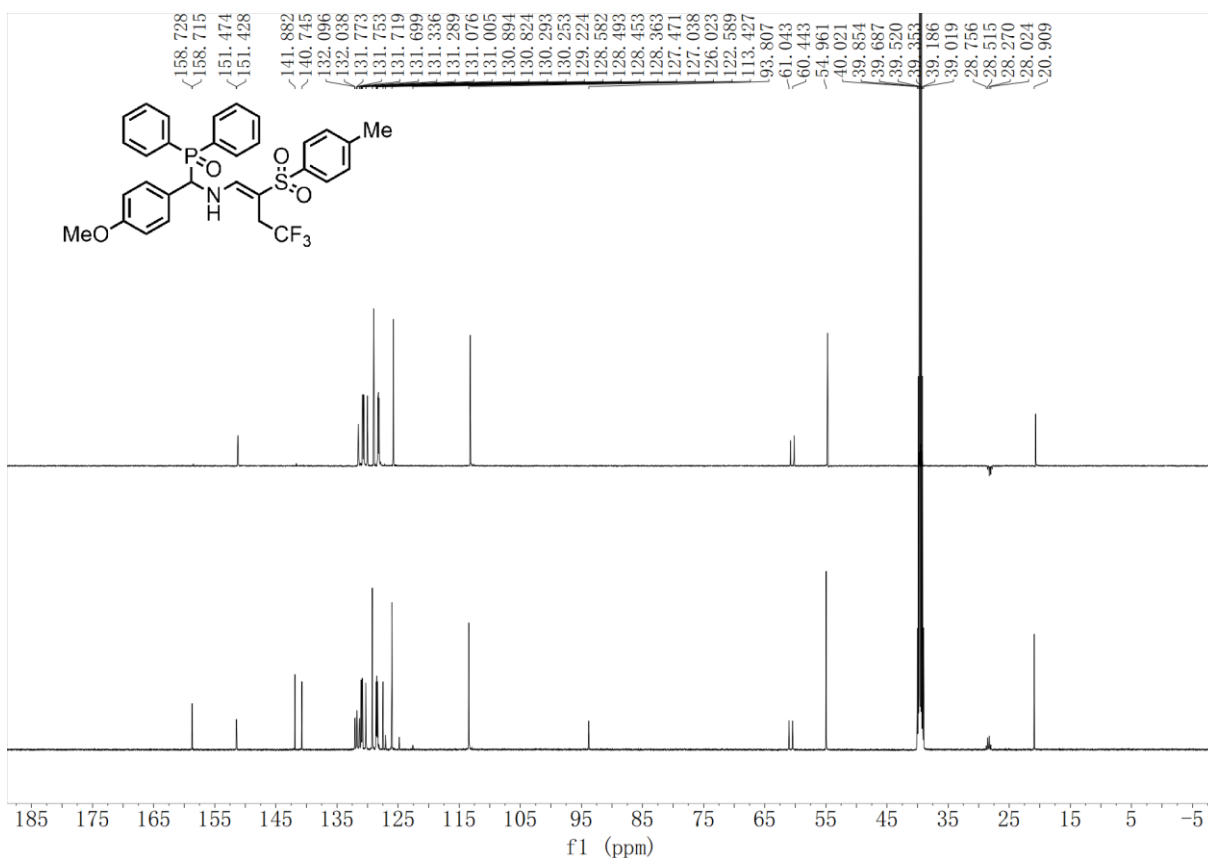



**4c** –  $^{19}\text{F}$  NMR (471 MHz, DMSO)

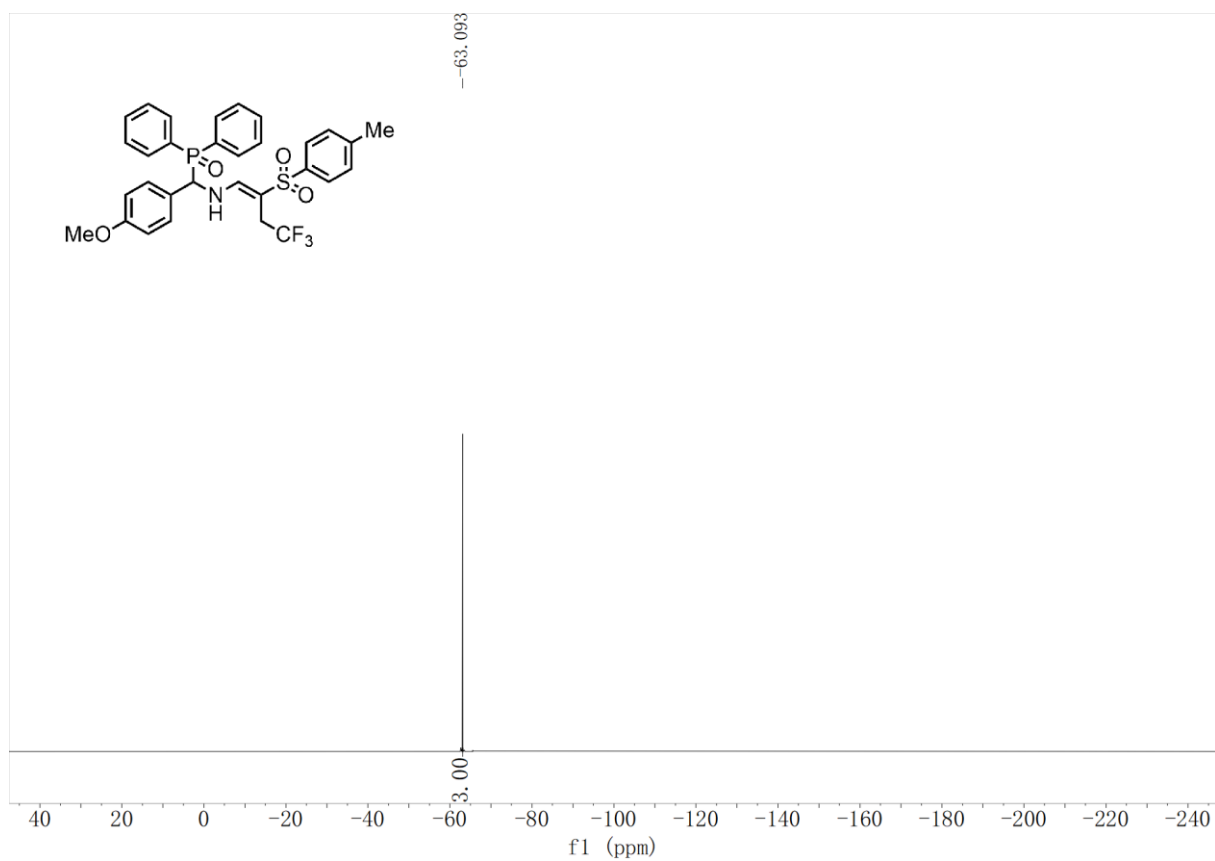

**4c** –  $^{31}\text{P}$  NMR (202 MHz, DMSO)

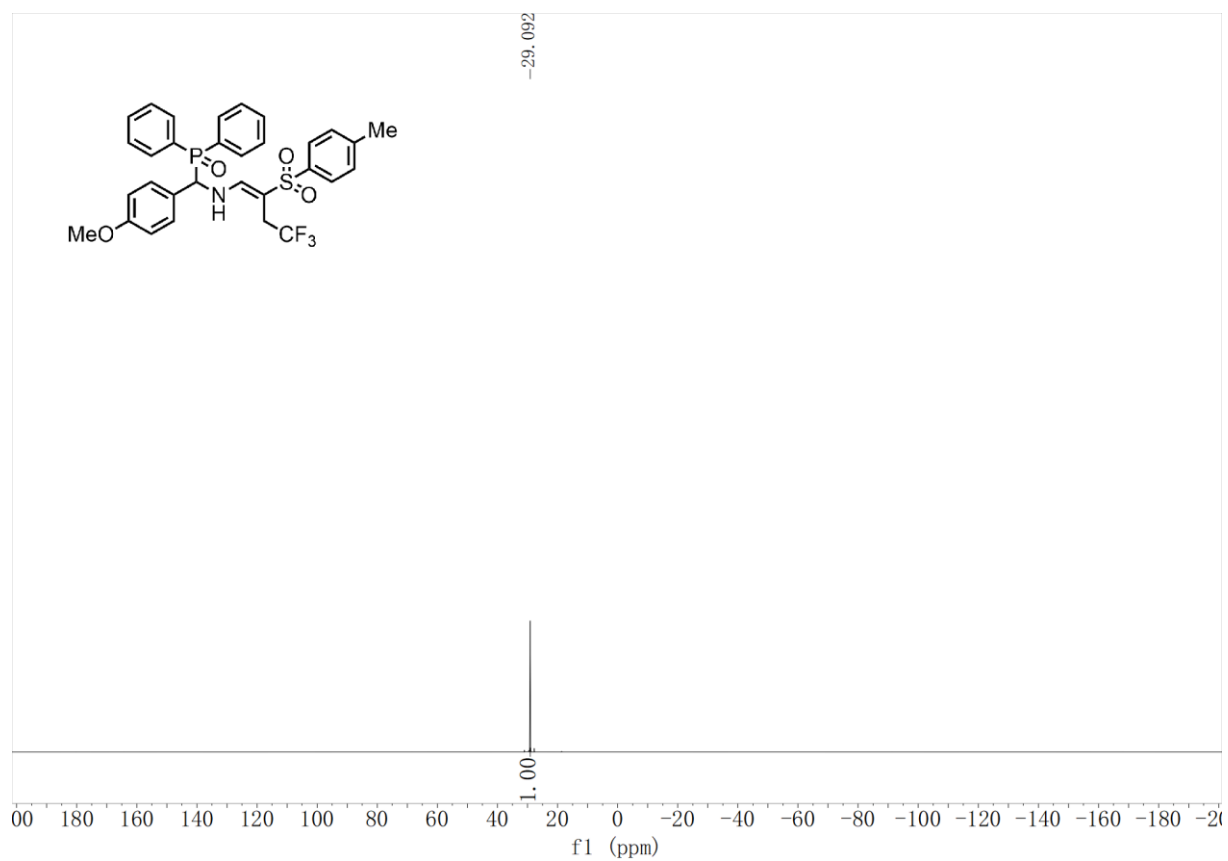

4d – <sup>1</sup>H NMR (500 MHz, DMSO)

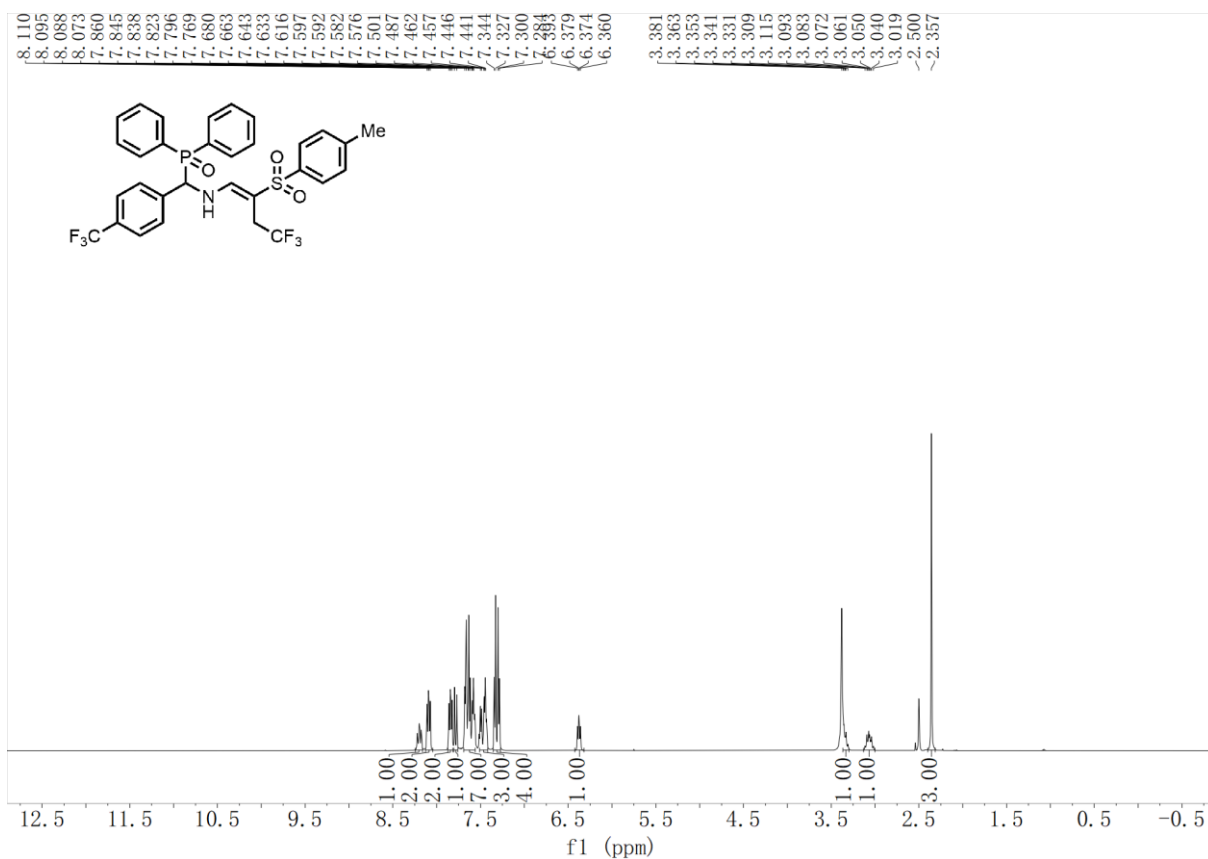

4d – <sup>13</sup>C NMR (126 MHz, DMSO)

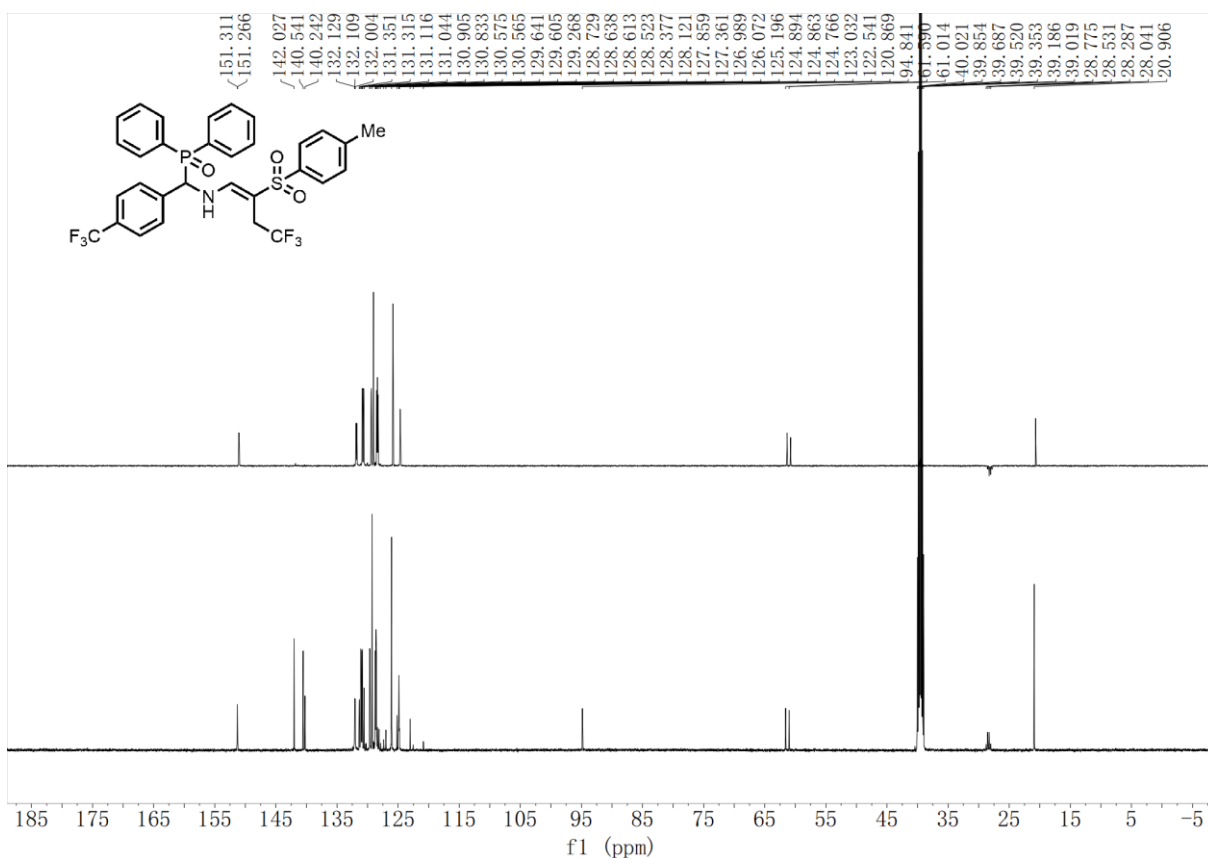

**4d** –  $^{19}\text{F}$  NMR (471 MHz, DMSO)

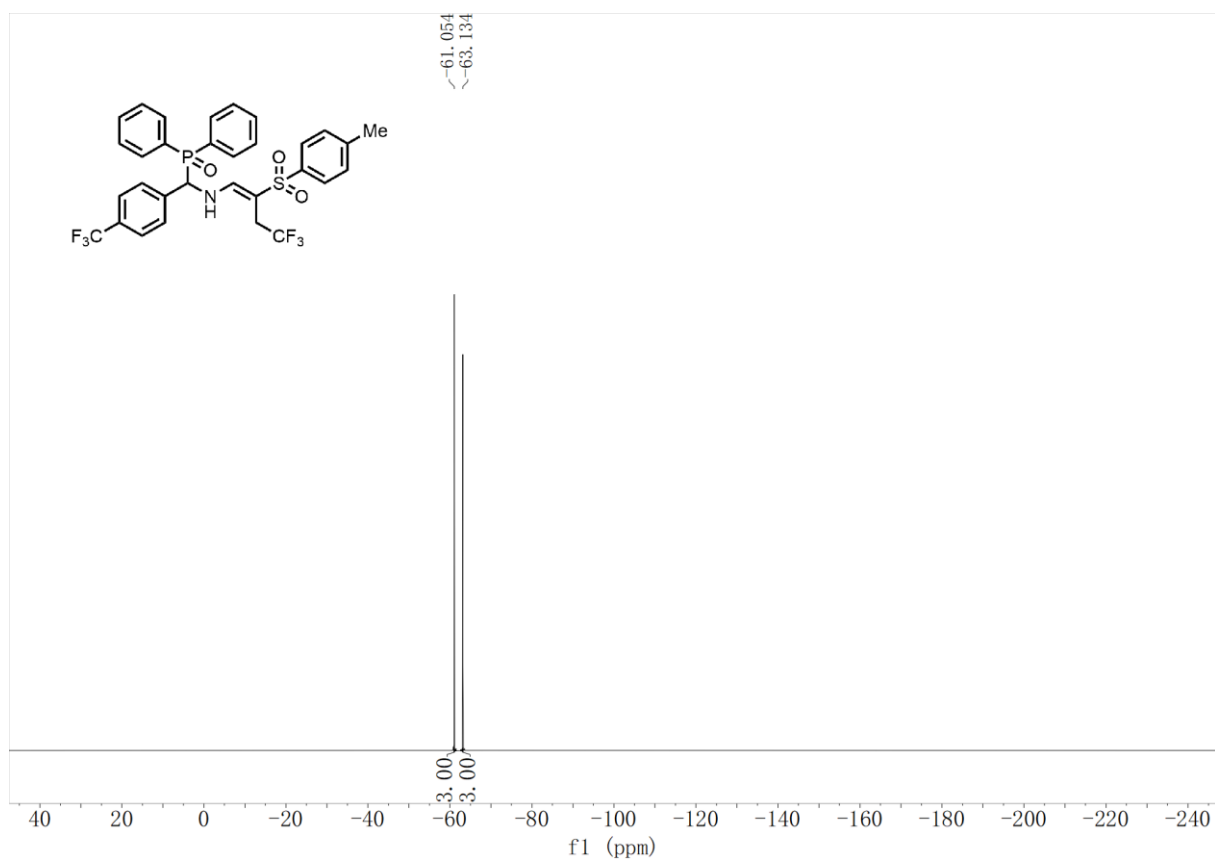

**4d** –  $^{31}\text{P}$  NMR (202 MHz, DMSO)

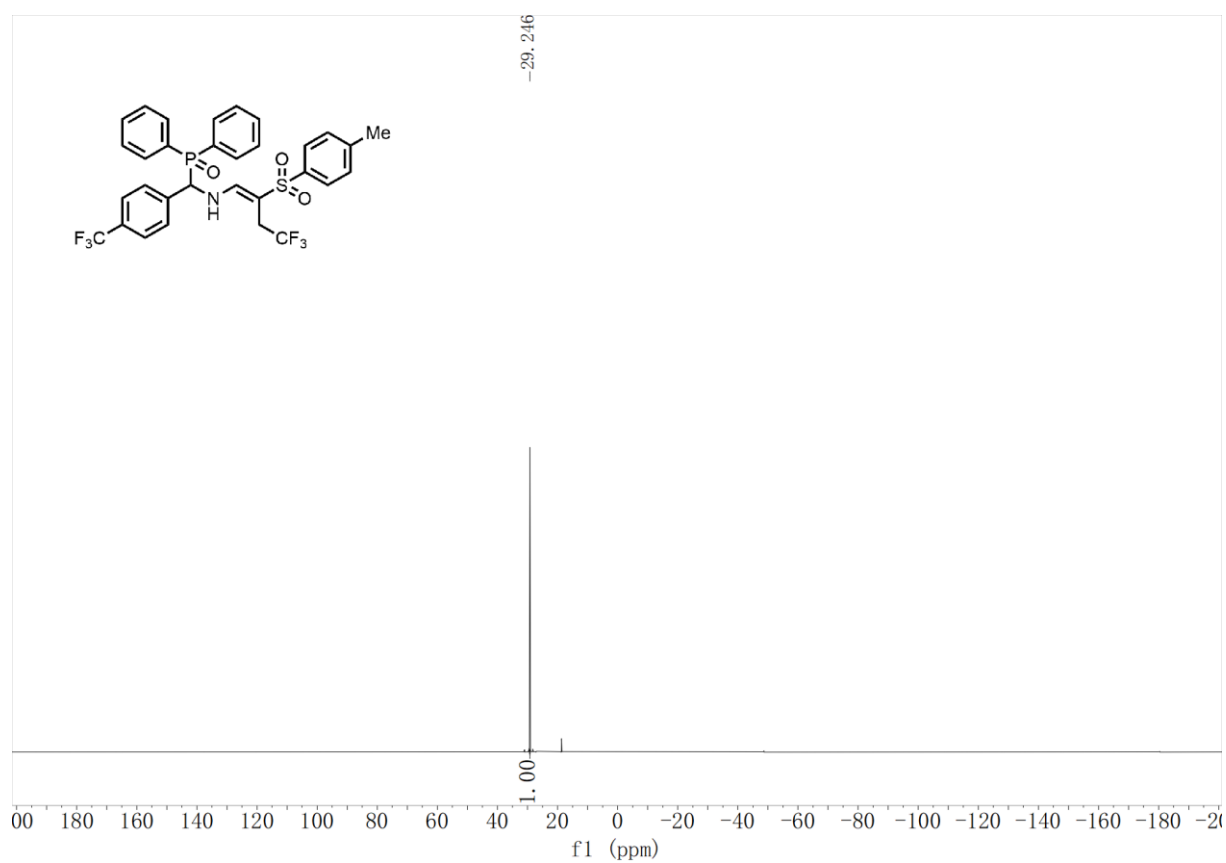

**4e** –  $^1\text{H}$  NMR (500 MHz, DMSO)

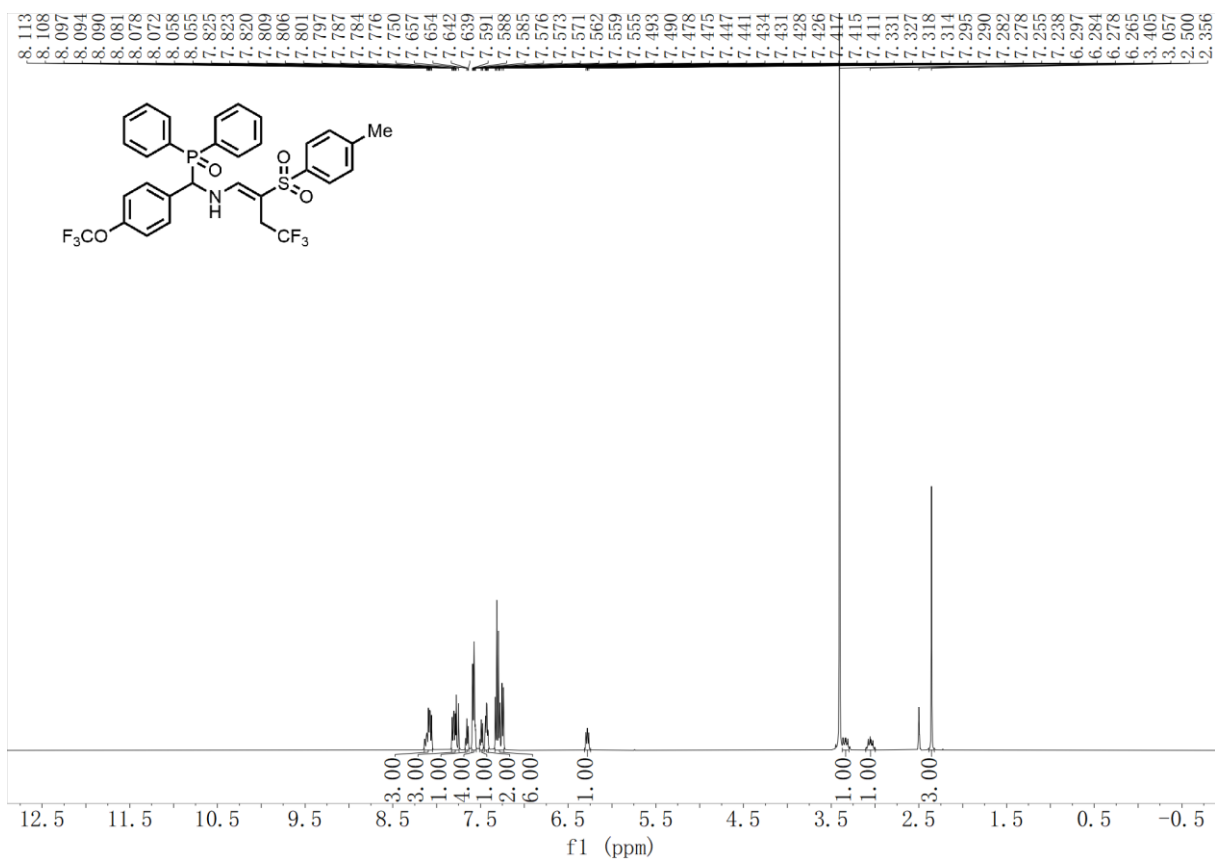

**4e** –  $^{13}\text{C}$  NMR (126 MHz, DMSO)

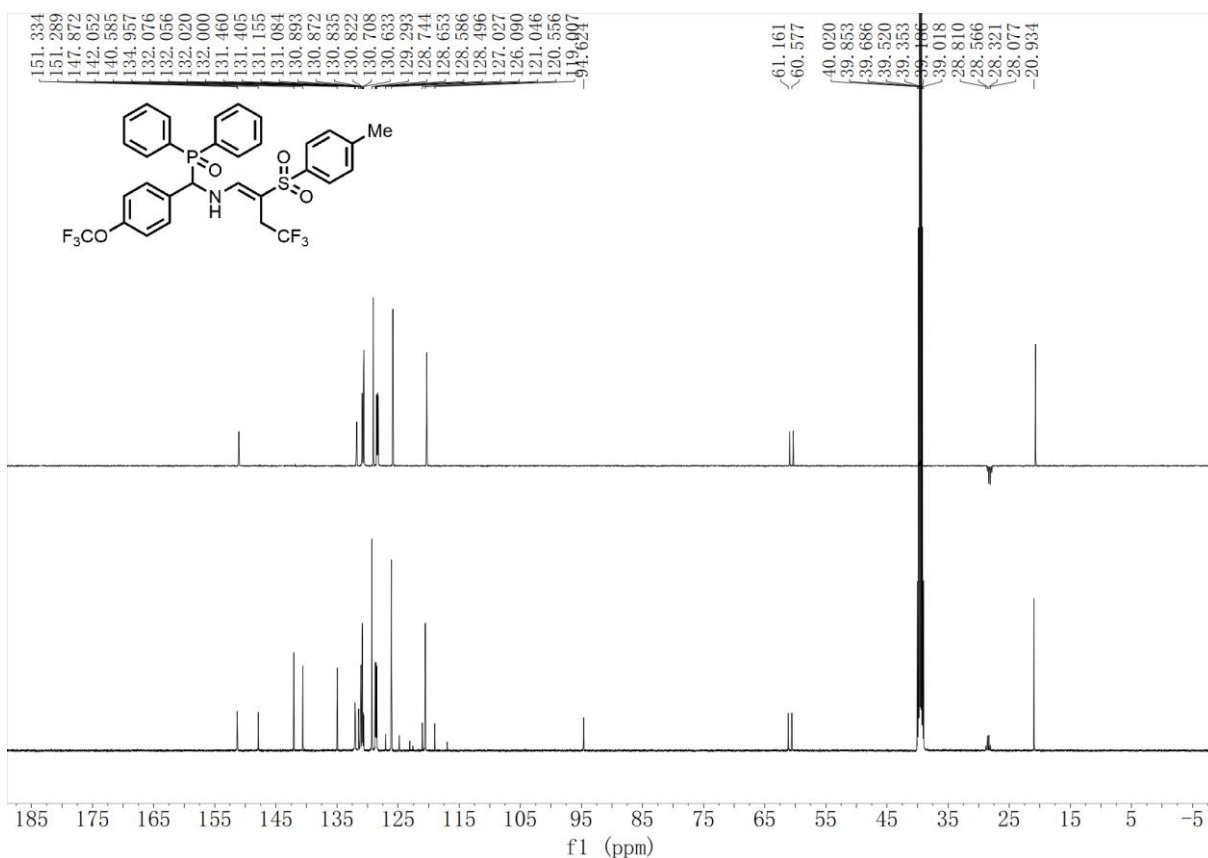

**4e** –  $^{19}\text{F}$  NMR (282 MHz, DMSO)

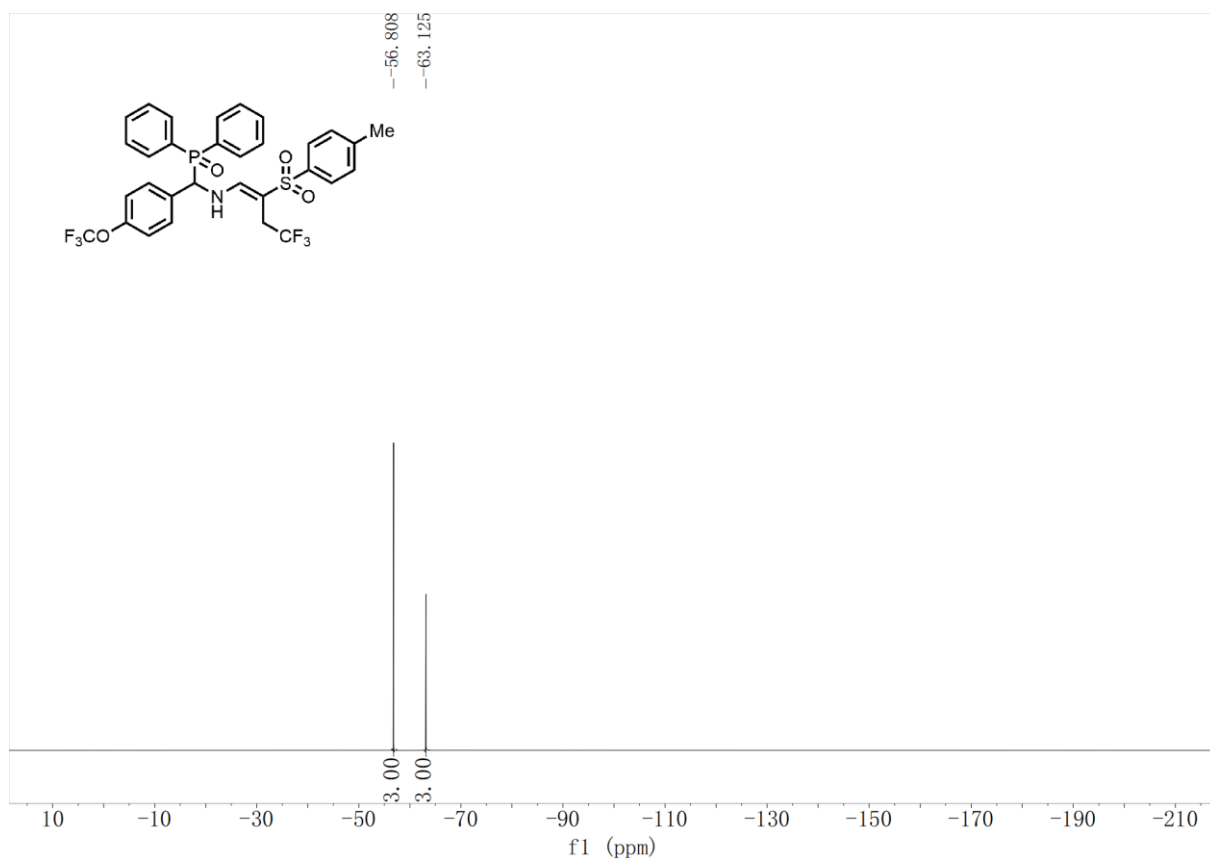

**4e** –  $^{31}\text{P}$  NMR (121 MHz, DMSO)

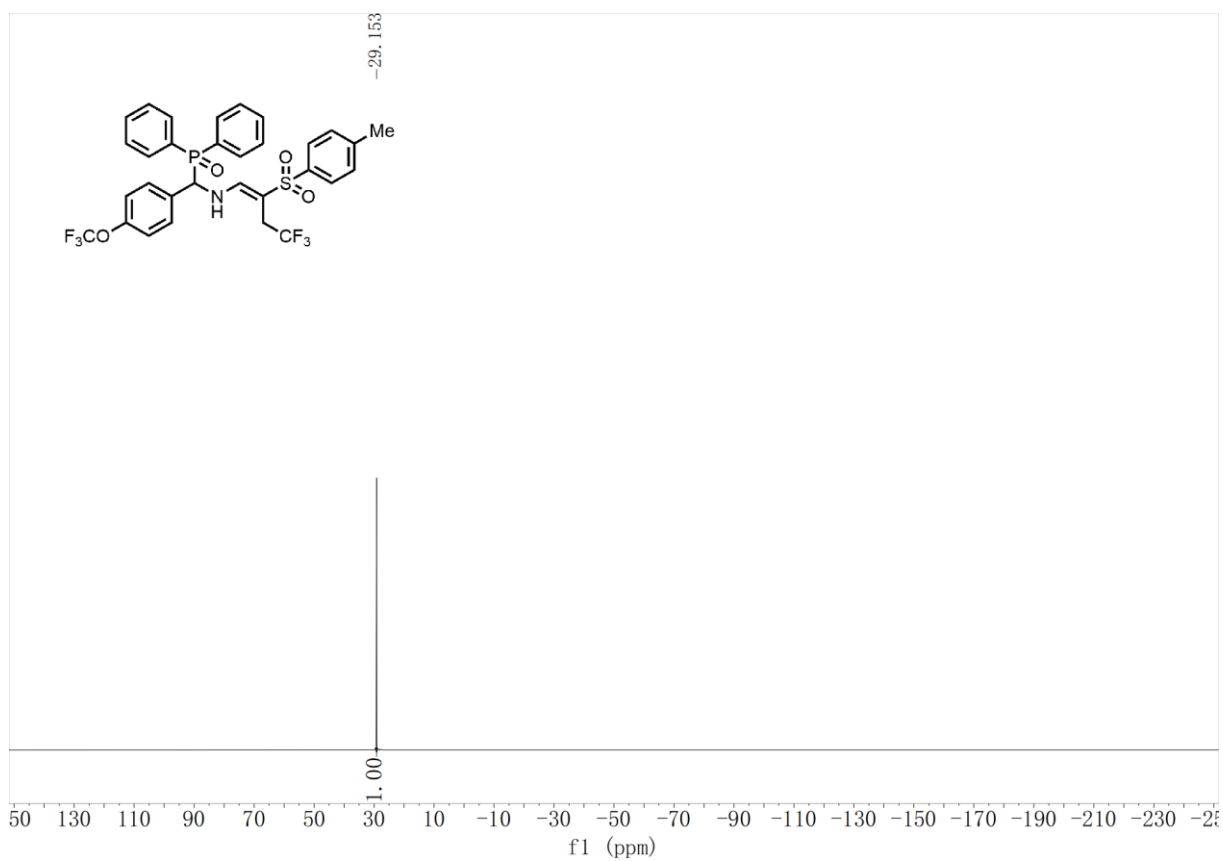

**4f** – <sup>1</sup>H NMR (500 MHz, DMSO)

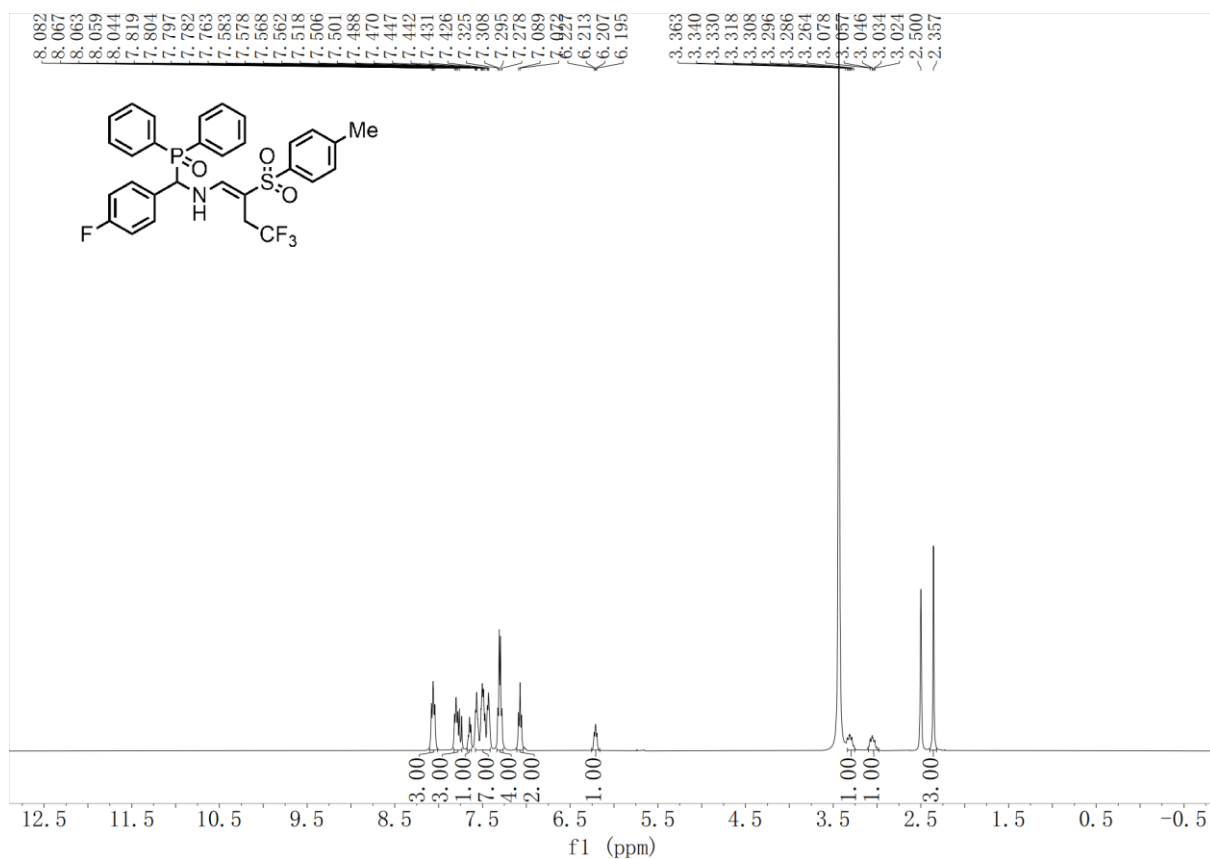

**4f** – <sup>13</sup>C NMR (126 MHz, DMSO)

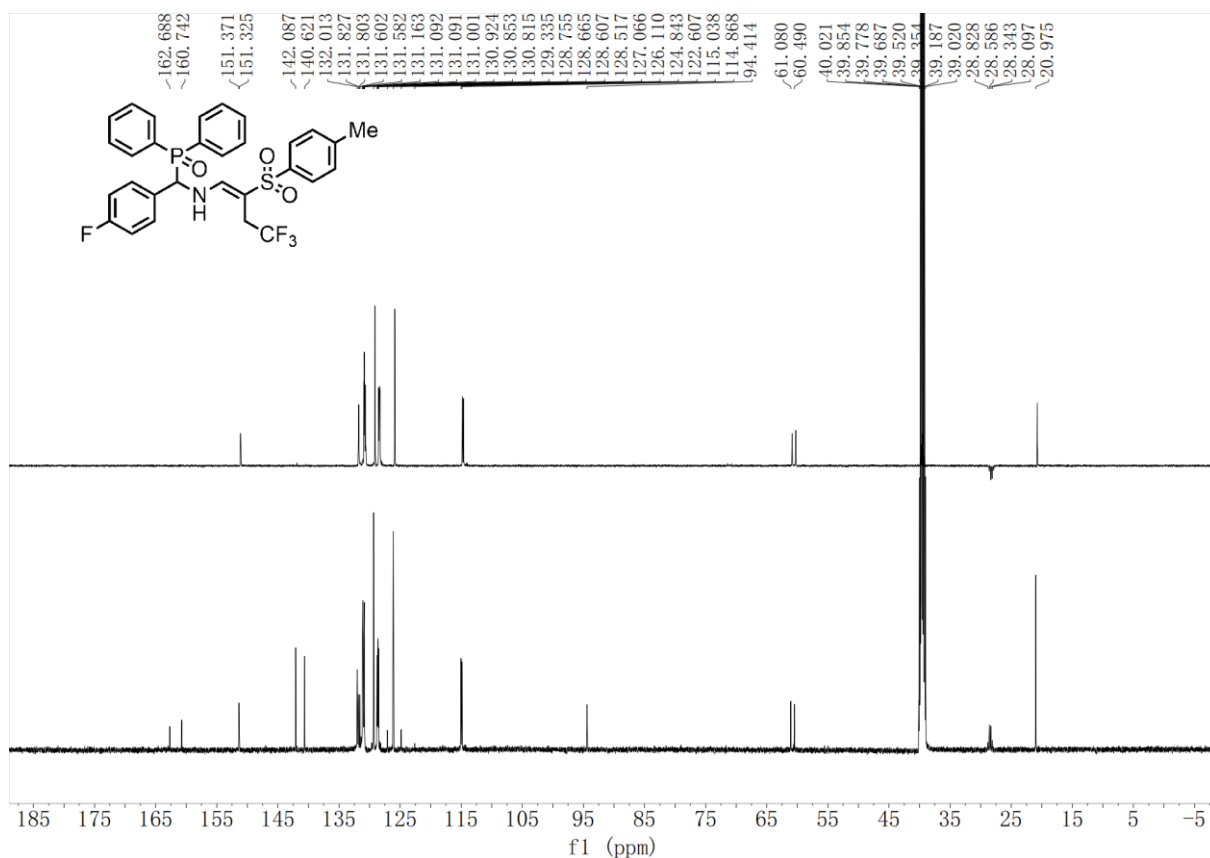

**4f** –  $^{19}\text{F}$  NMR (471 MHz, DMSO)

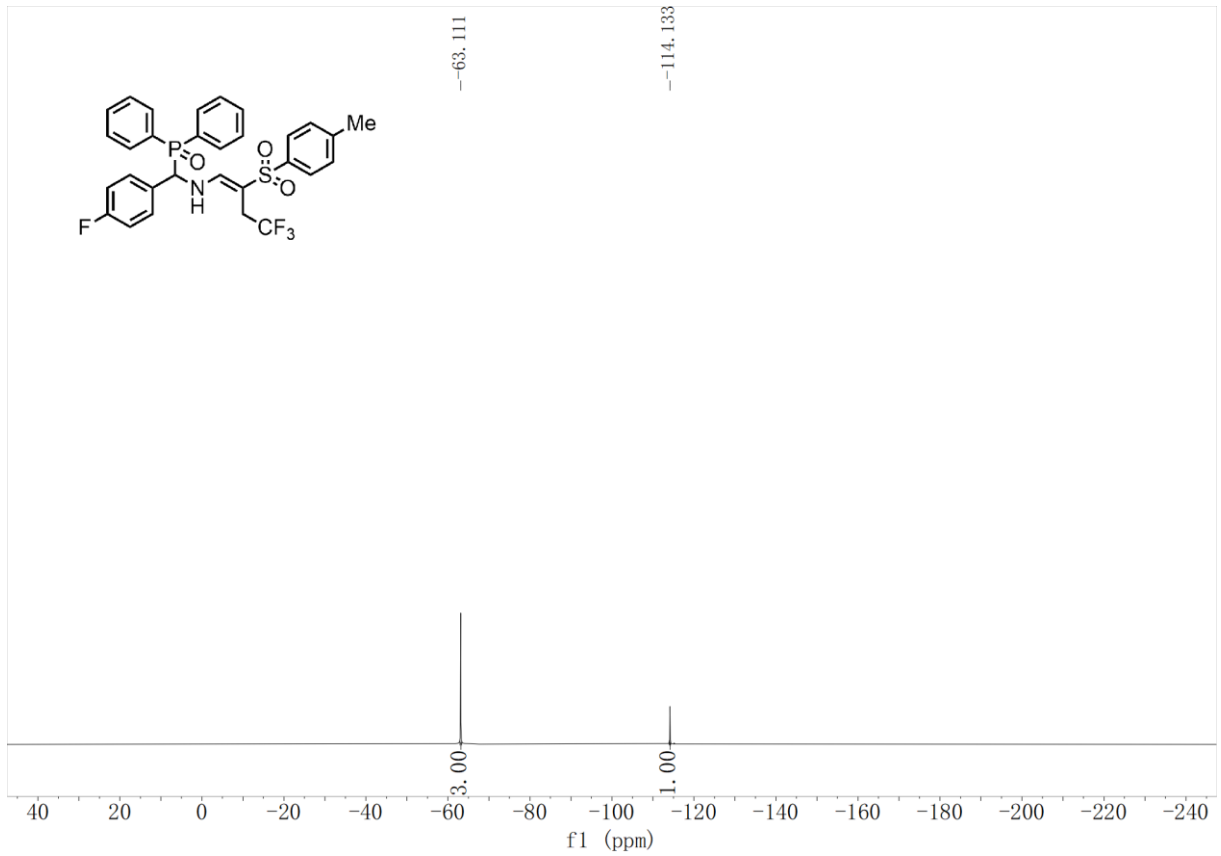

**4f** –  $^{31}\text{P}$  NMR (121 MHz, DMSO)

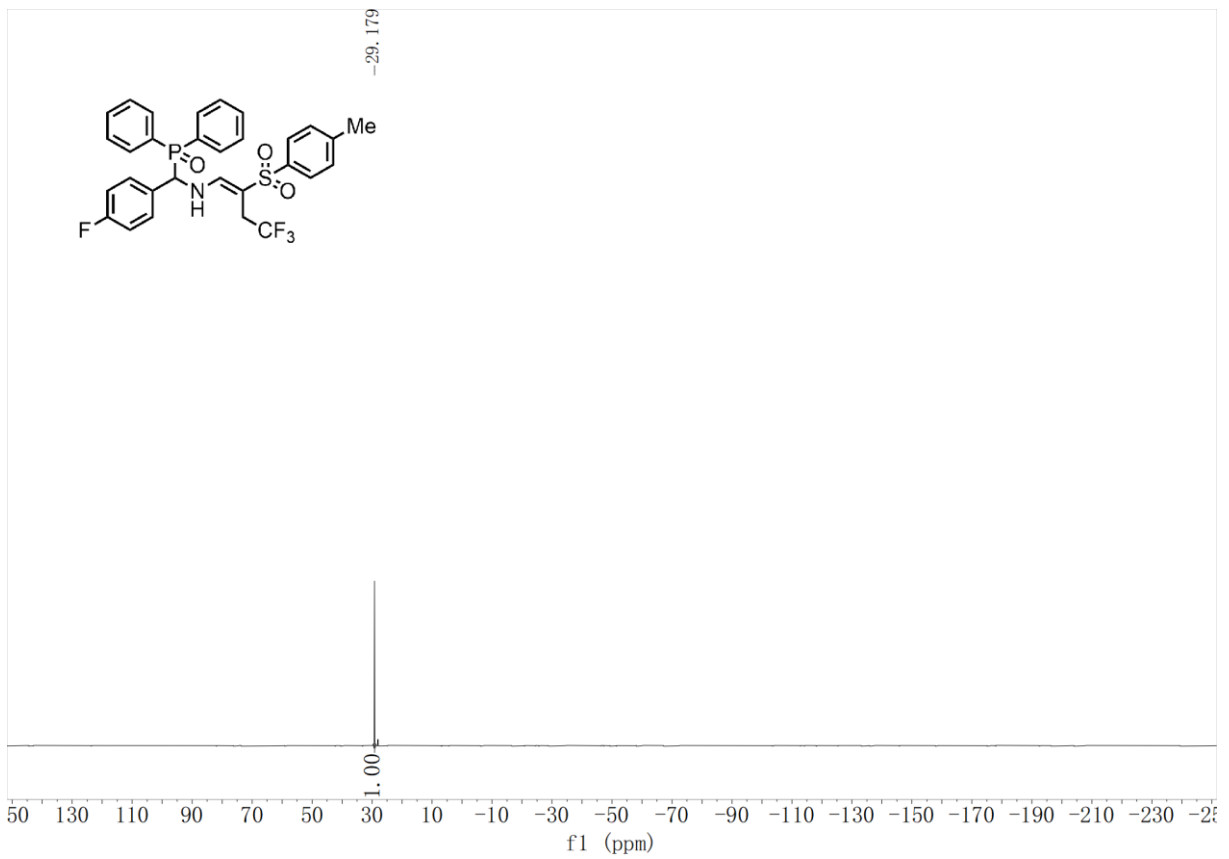

**4g** – <sup>1</sup>H NMR (500 MHz, DMSO)

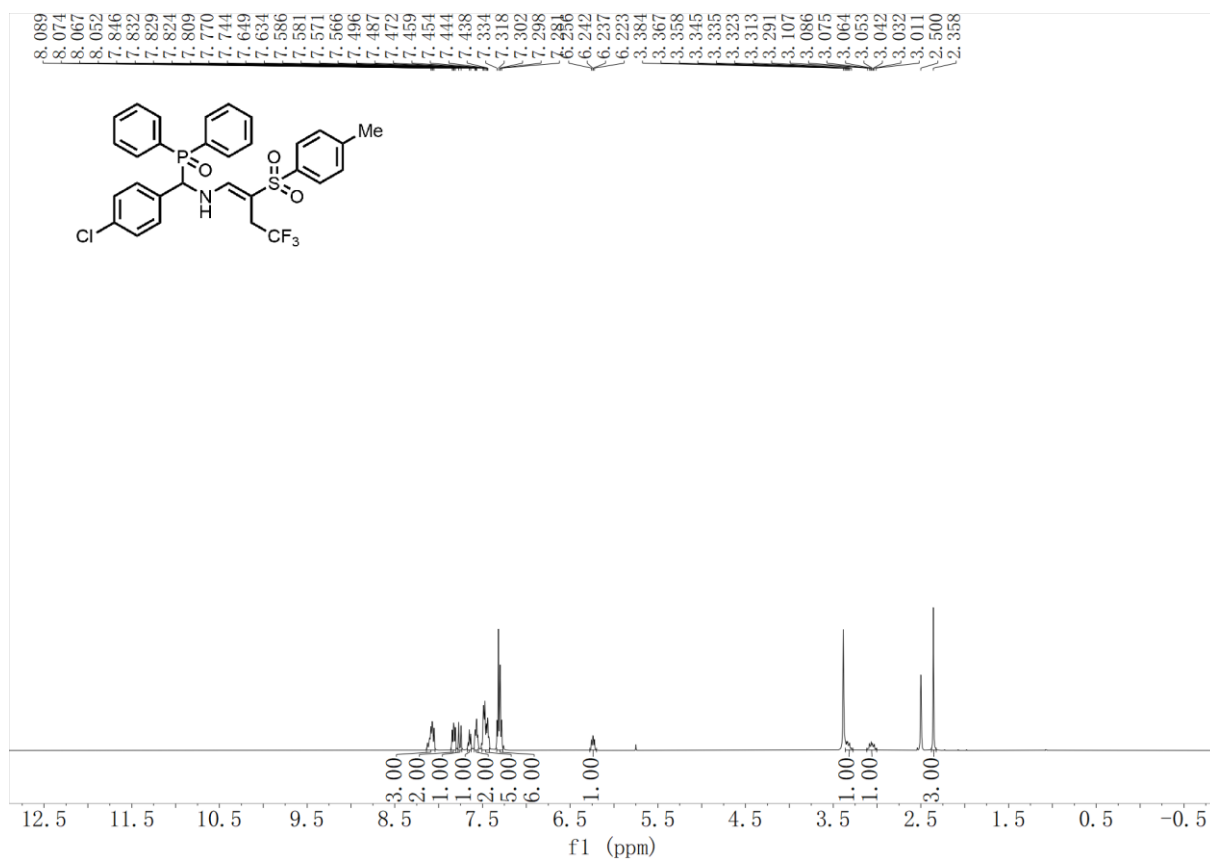

**4g** – <sup>13</sup>C NMR (126 MHz, DMSO)

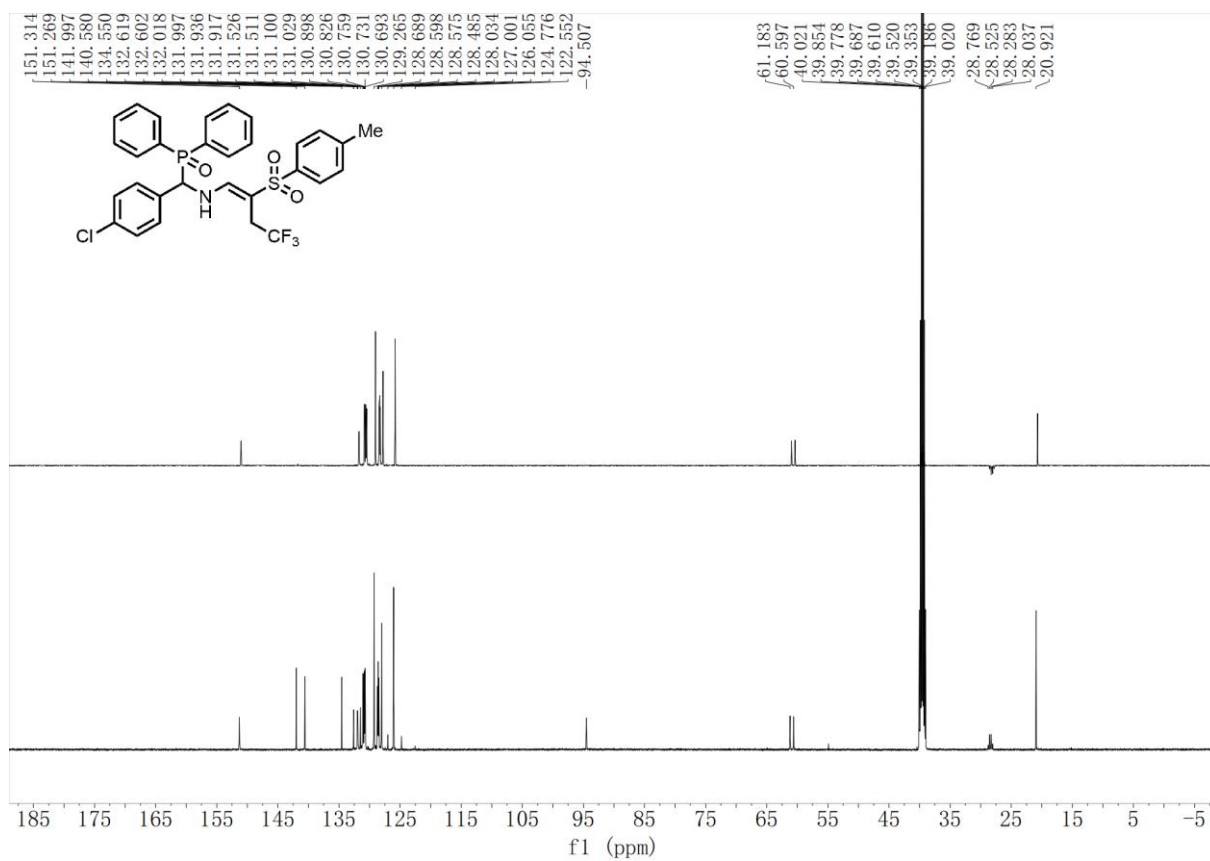



**4g** –  $^{19}\text{F}$  NMR (471 MHz, DMSO)

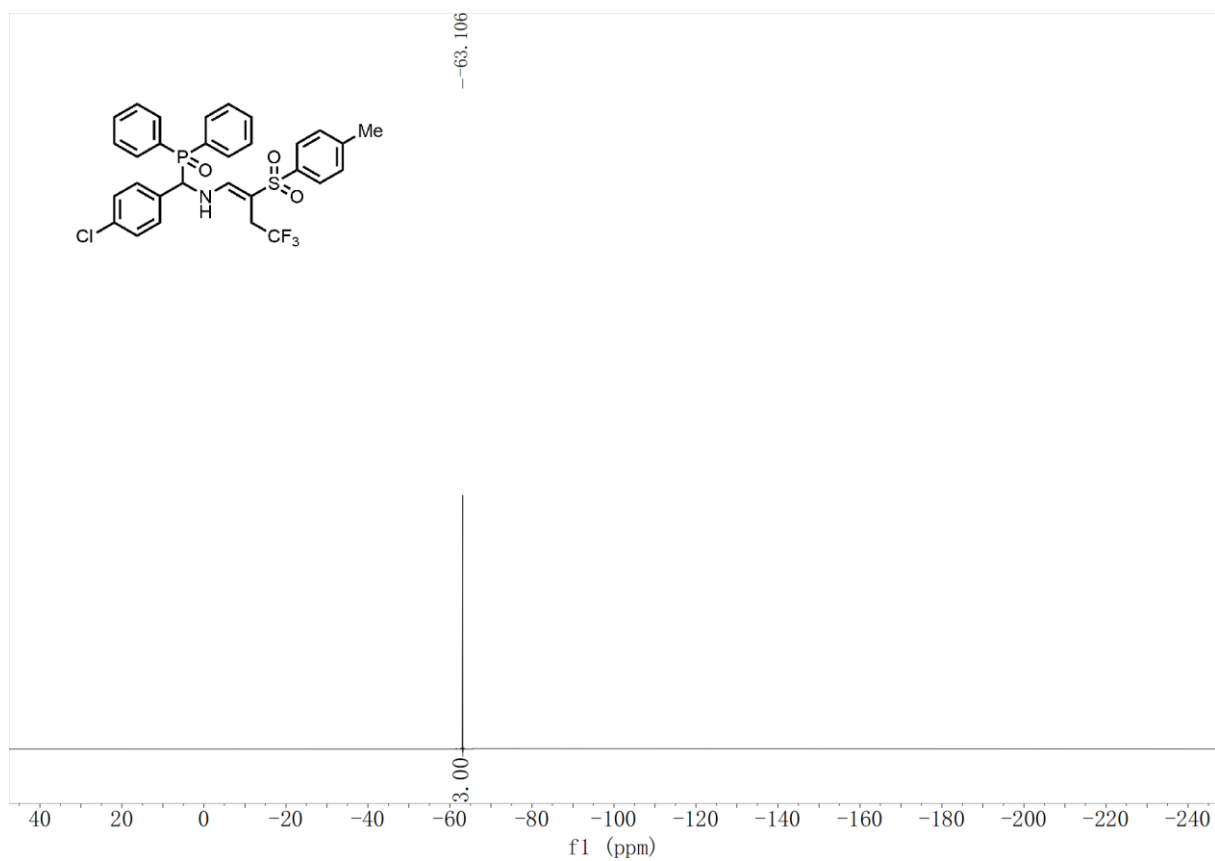

**4g** –  $^{31}\text{P}$  NMR (202 MHz, DMSO)

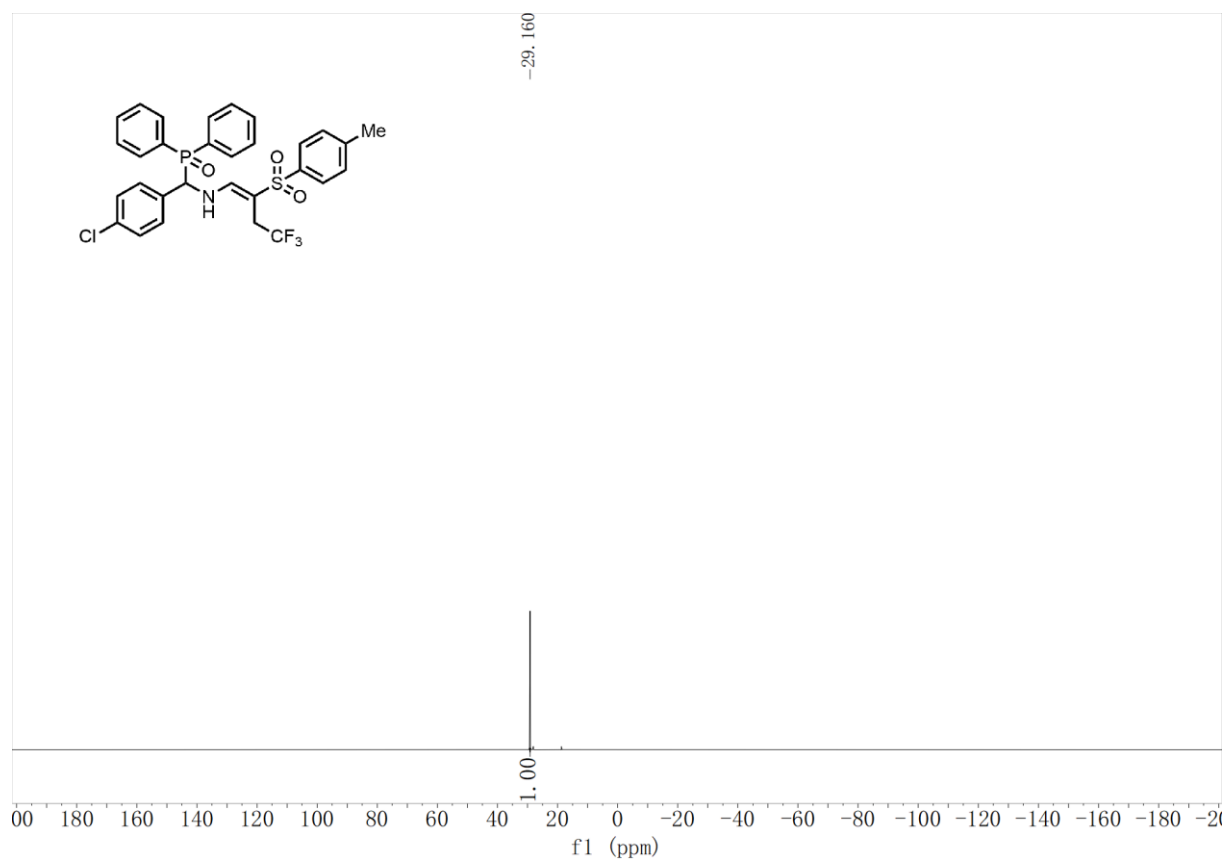

4h – <sup>1</sup>H NMR (500 MHz, DMSO)

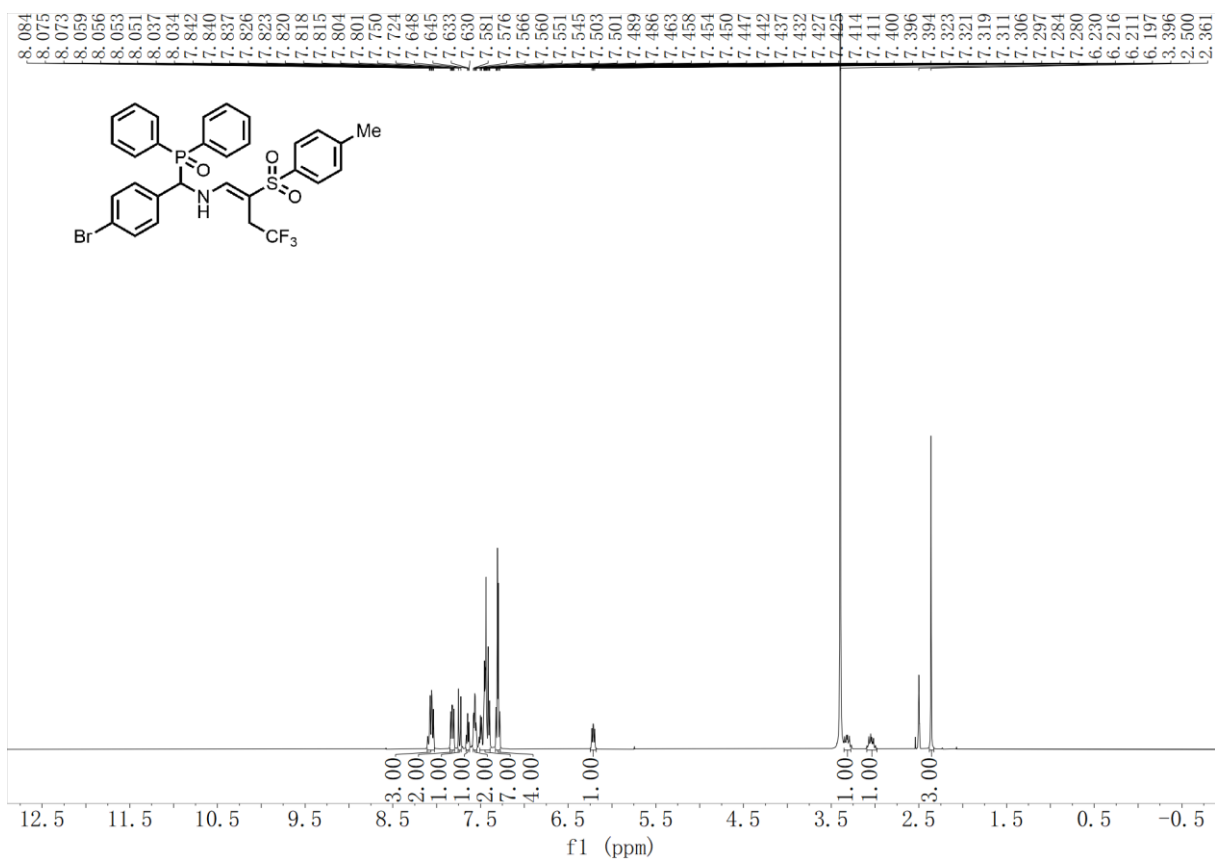

4h – <sup>13</sup>C NMR (126 MHz, DMSO)

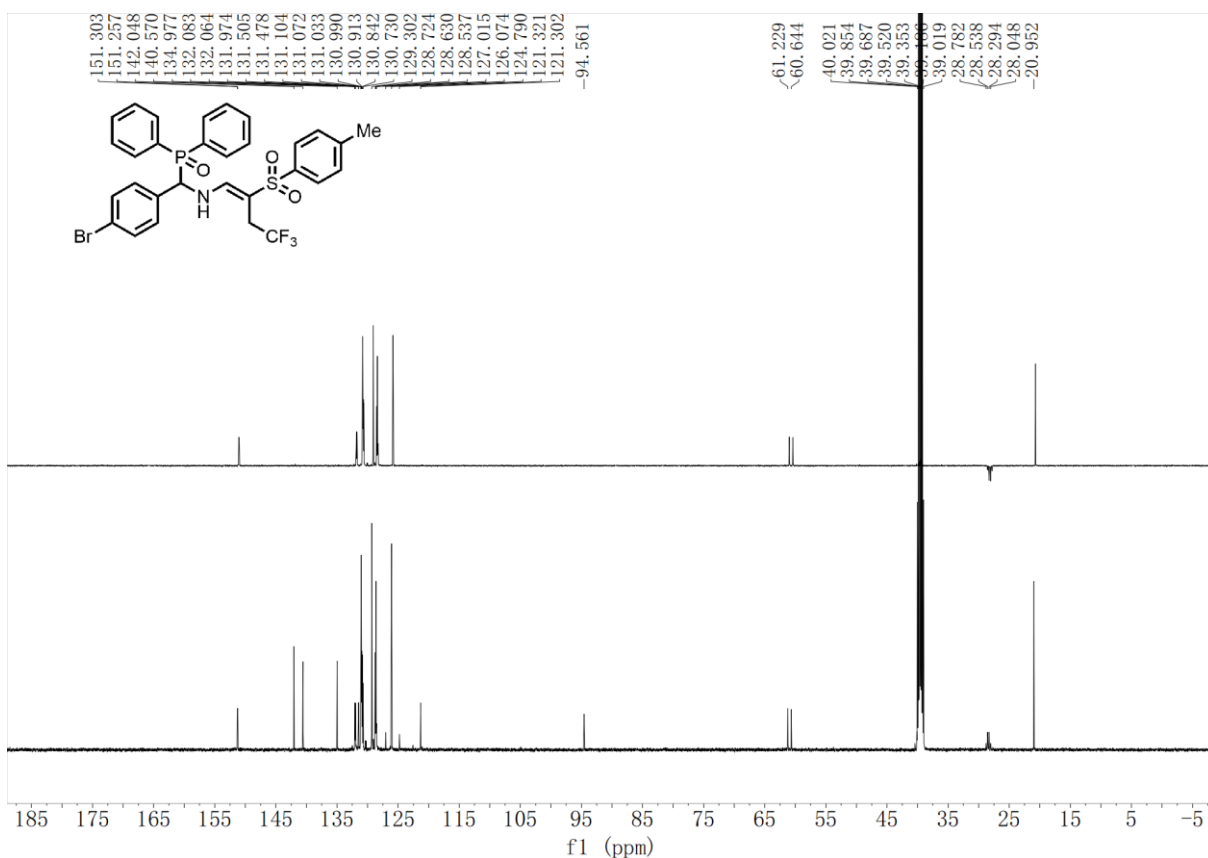

**4h** –  $^{19}\text{F}$  NMR (282 MHz, DMSO)

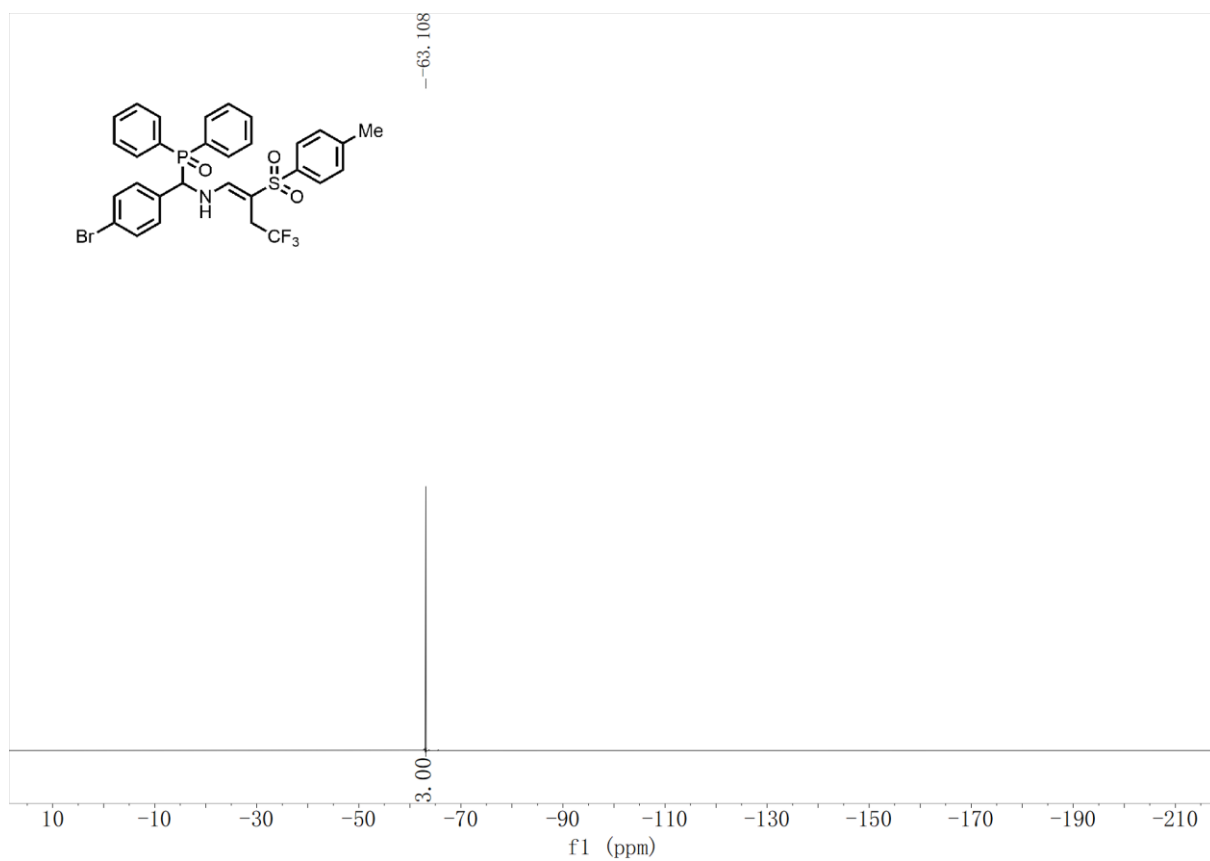

**4h** –  $^{31}\text{P}$  NMR (121 MHz, DMSO)

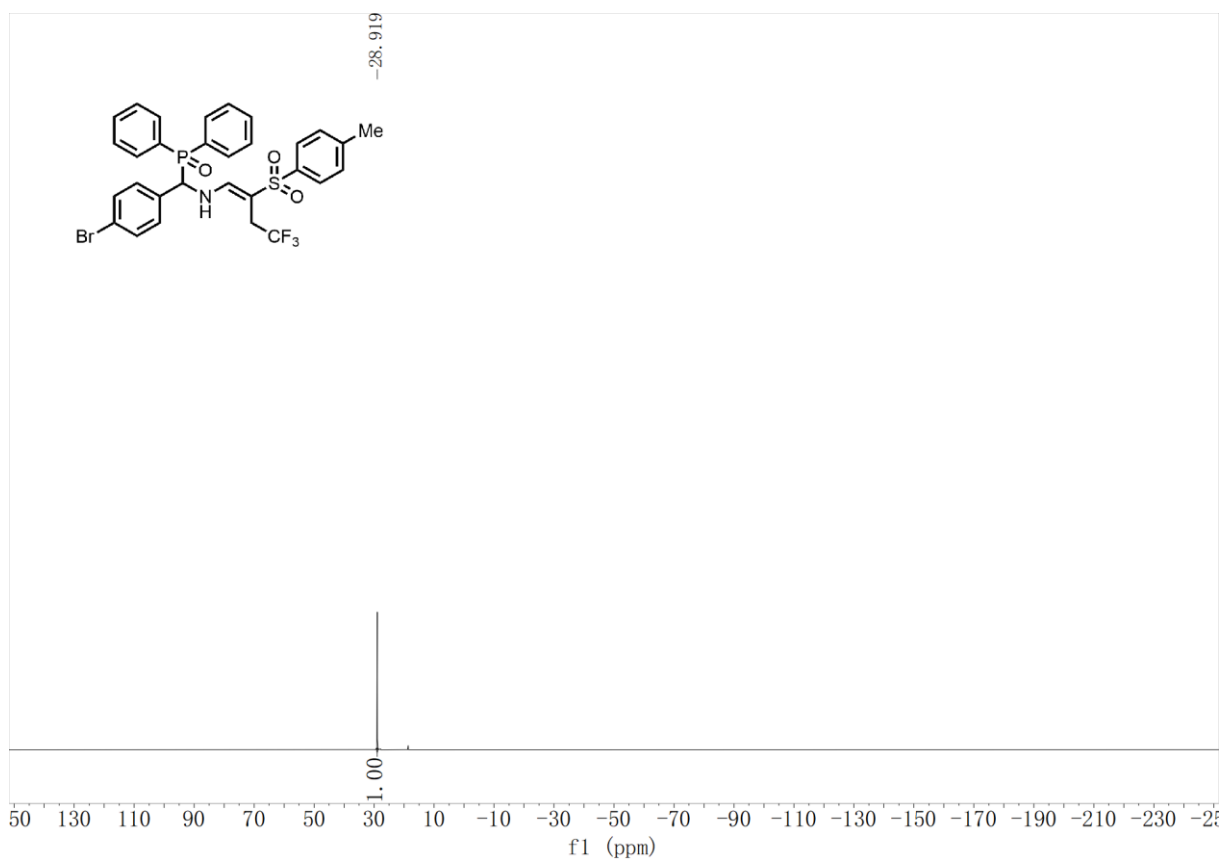

4i – <sup>1</sup>H NMR (500 MHz, DMSO)

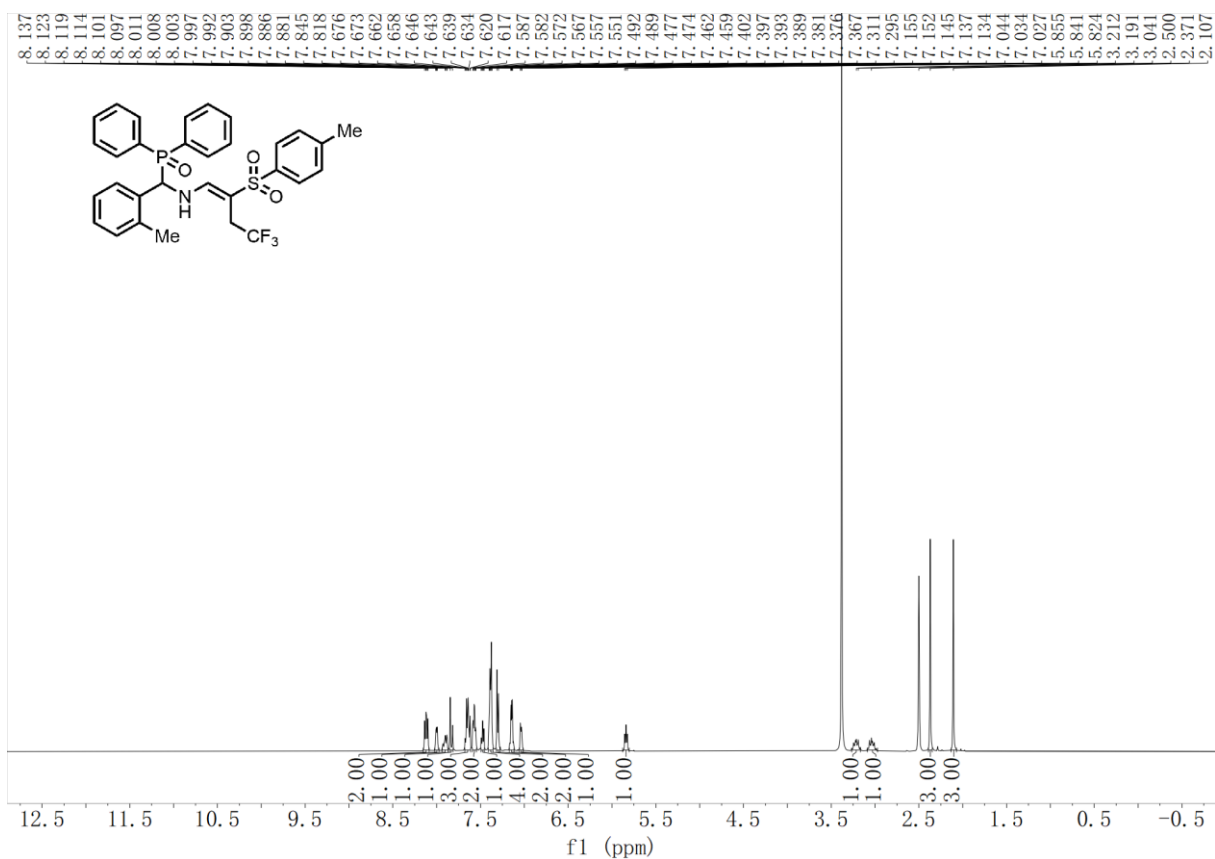

4i – <sup>13</sup>C NMR (126 MHz, DMSO)

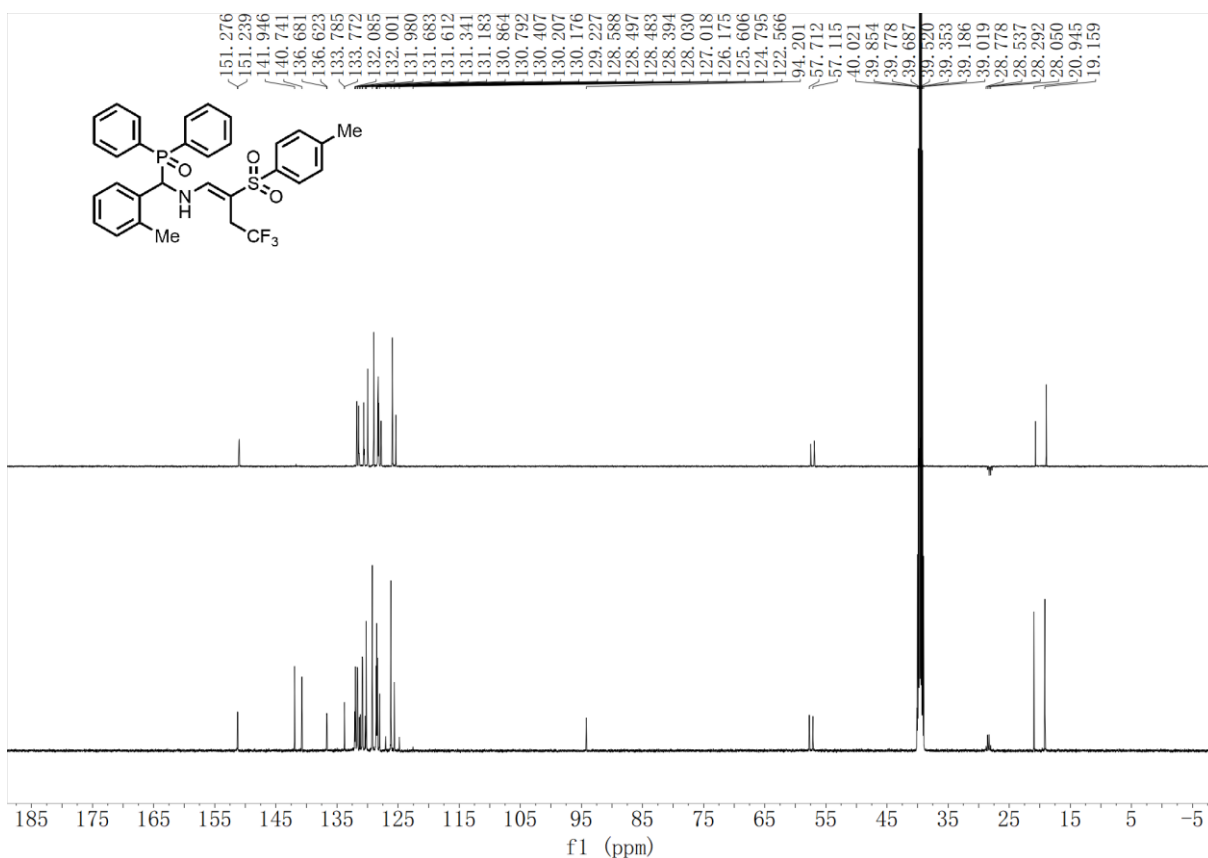

**4i** –  $^{19}\text{F}$  NMR (471 MHz, DMSO)

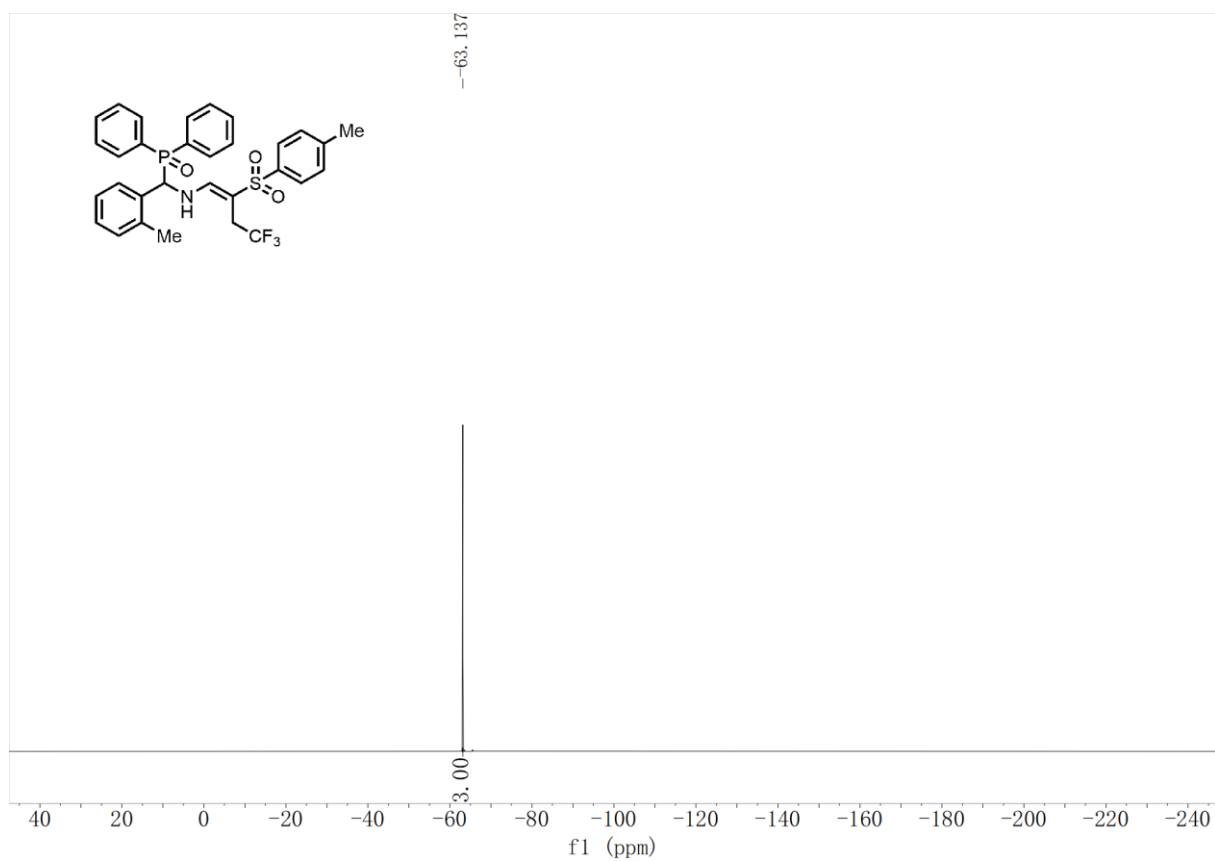

**4i** –  $^{31}\text{P}$  NMR (202 MHz, DMSO)

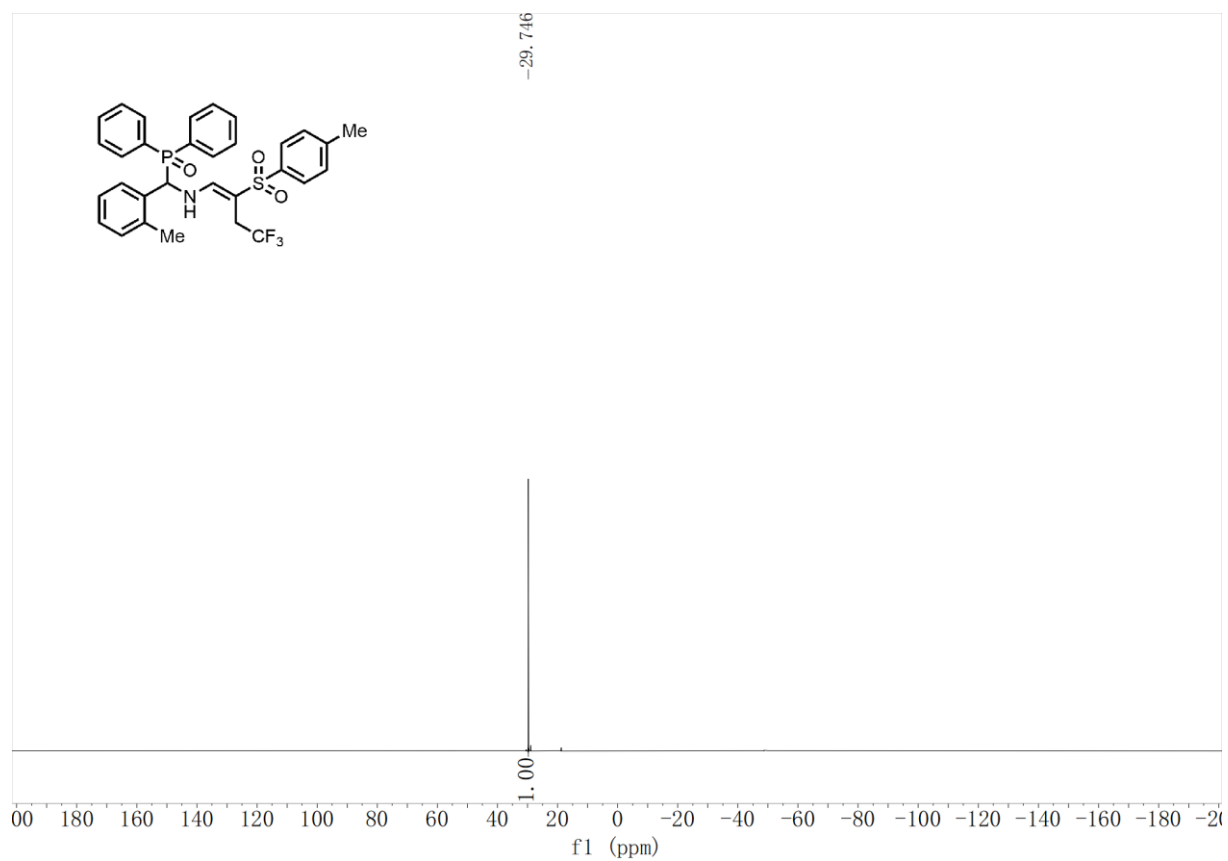

4j – <sup>1</sup>H NMR (500 MHz, DMSO)

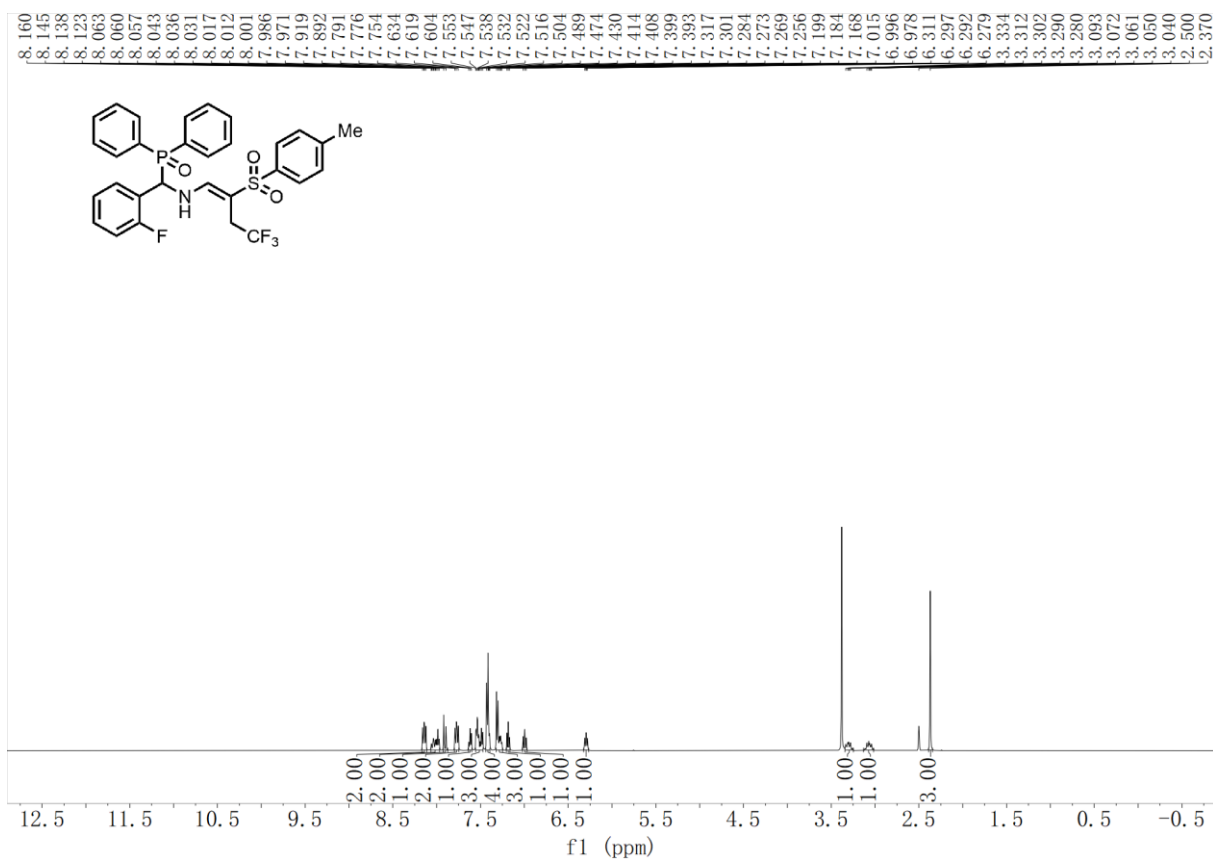

4j – <sup>13</sup>C NMR (126 MHz, DMSO)

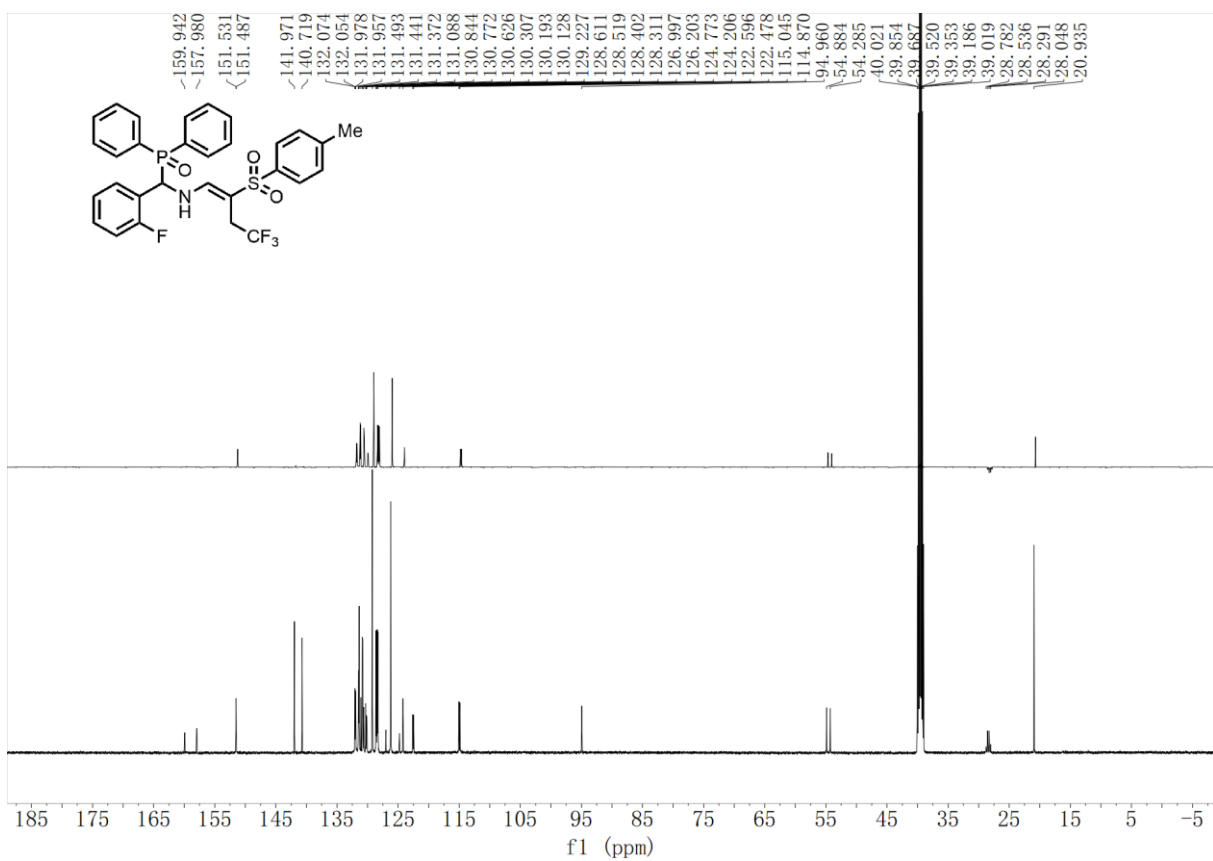

4j – <sup>19</sup>F NMR (471 MHz, DMSO)

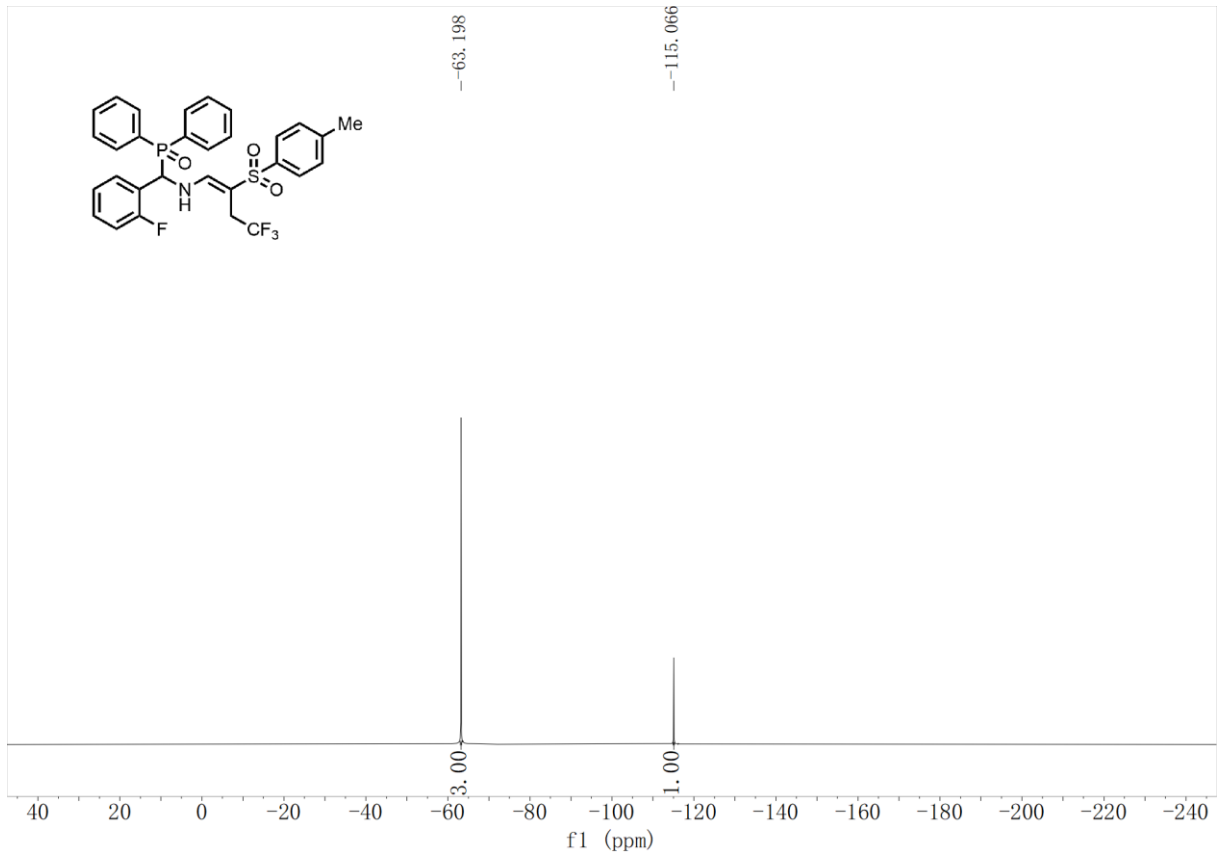

4j – <sup>31</sup>P NMR (202 MHz, DMSO)

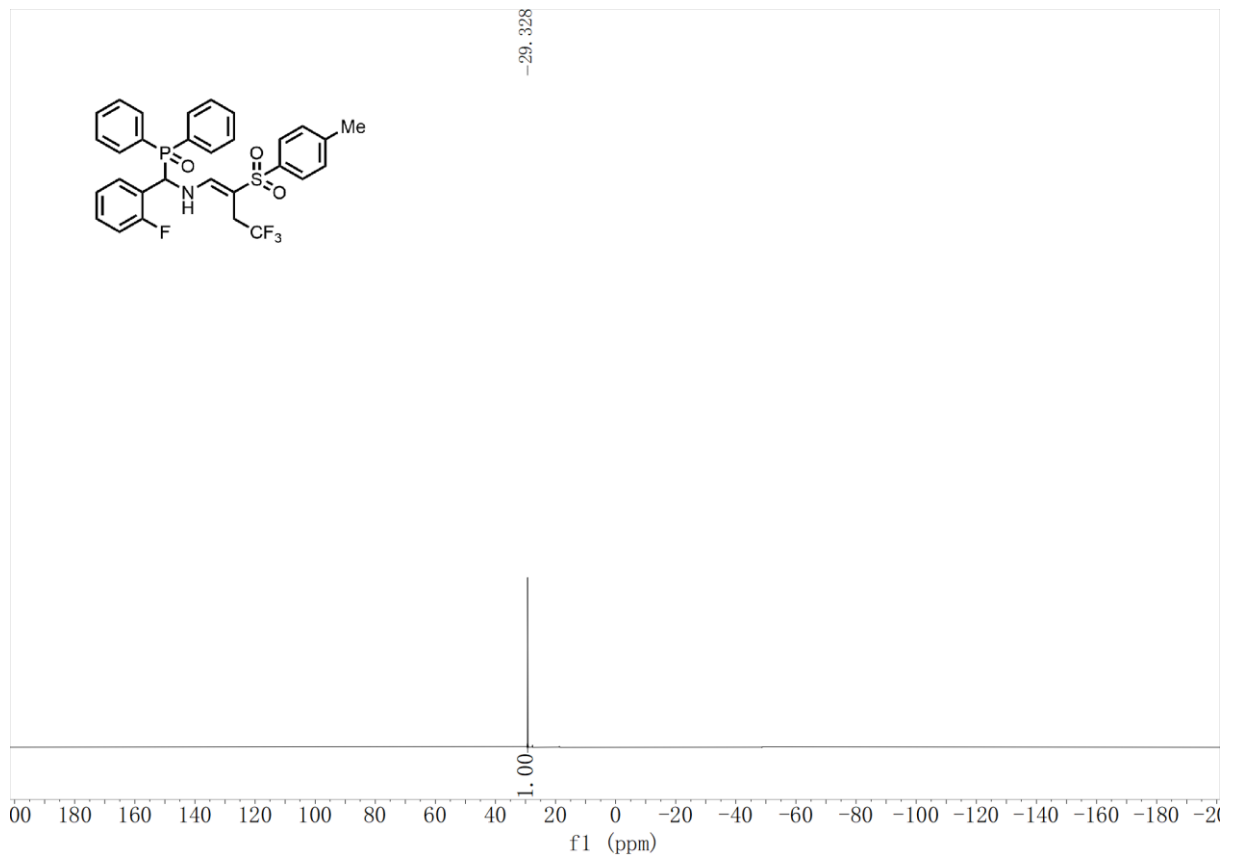

**4k** –  $^1\text{H}$  NMR (500 MHz, DMSO)

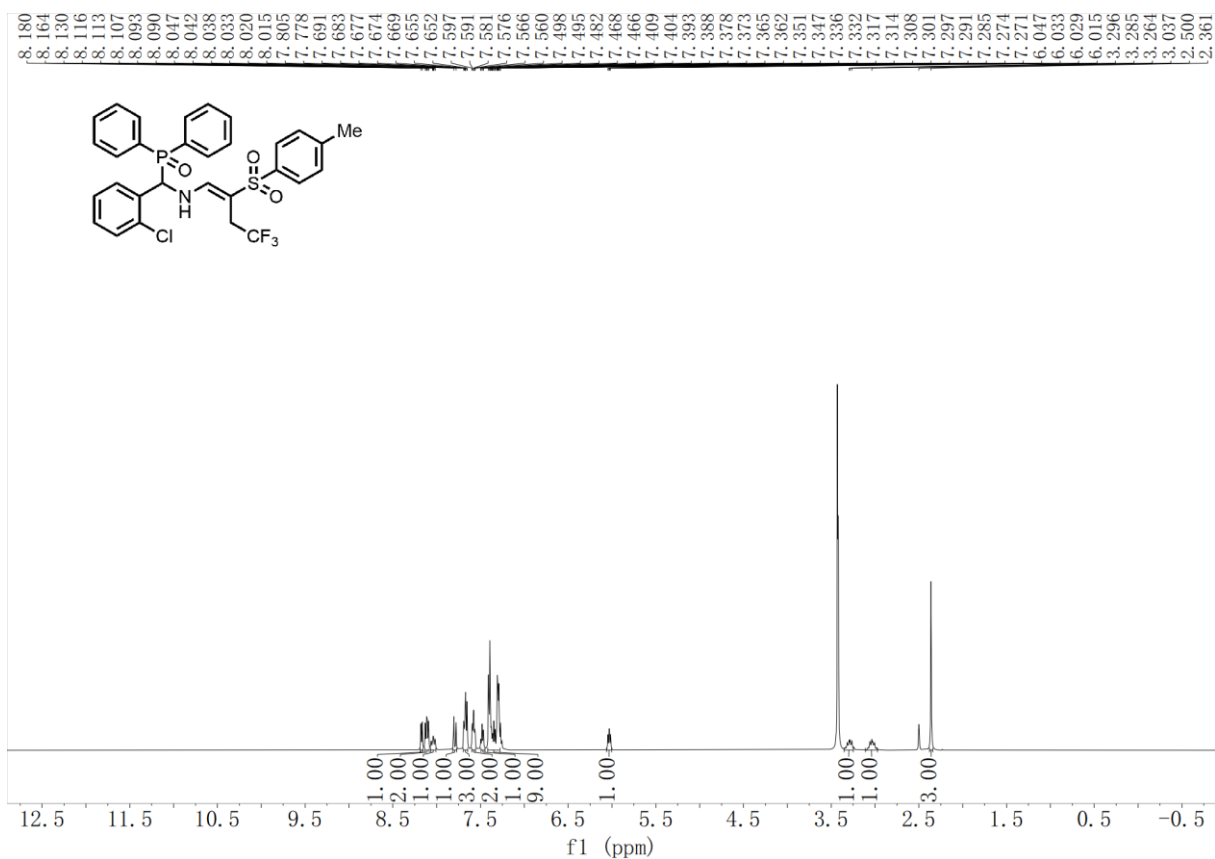

**4k** –  $^{13}\text{C}$  NMR (126 MHz, DMSO)

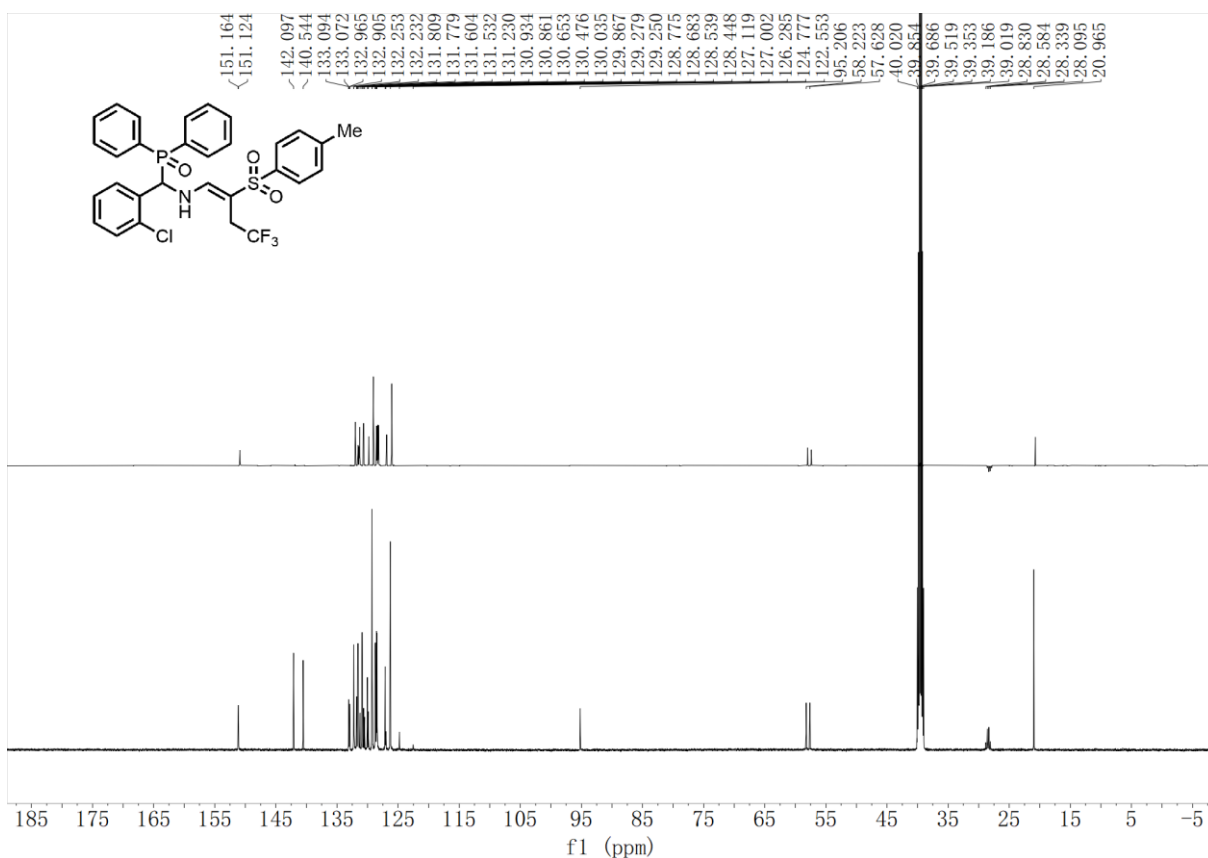



**4k** –  $^{19}\text{F}$  NMR (471 MHz, DMSO)

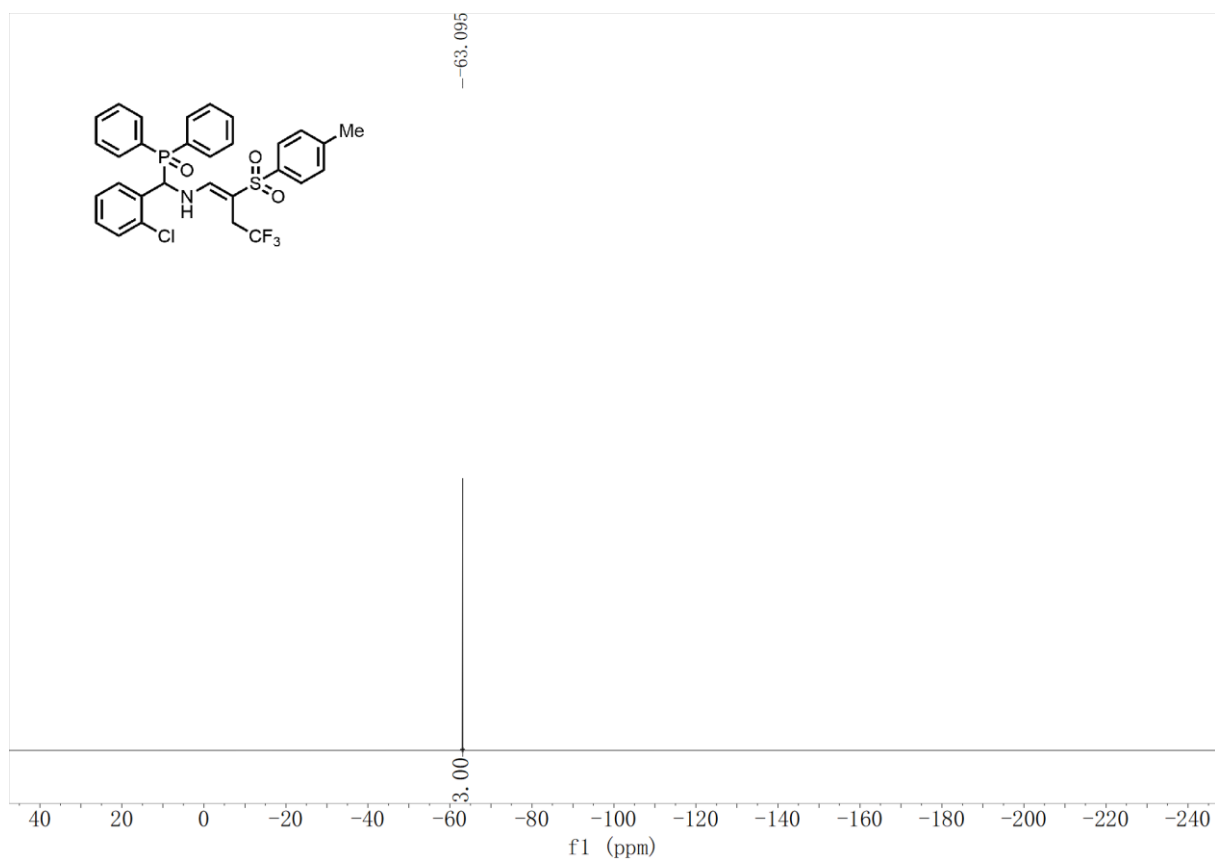

**4k** –  $^{31}\text{P}$  NMR (202 MHz, DMSO)

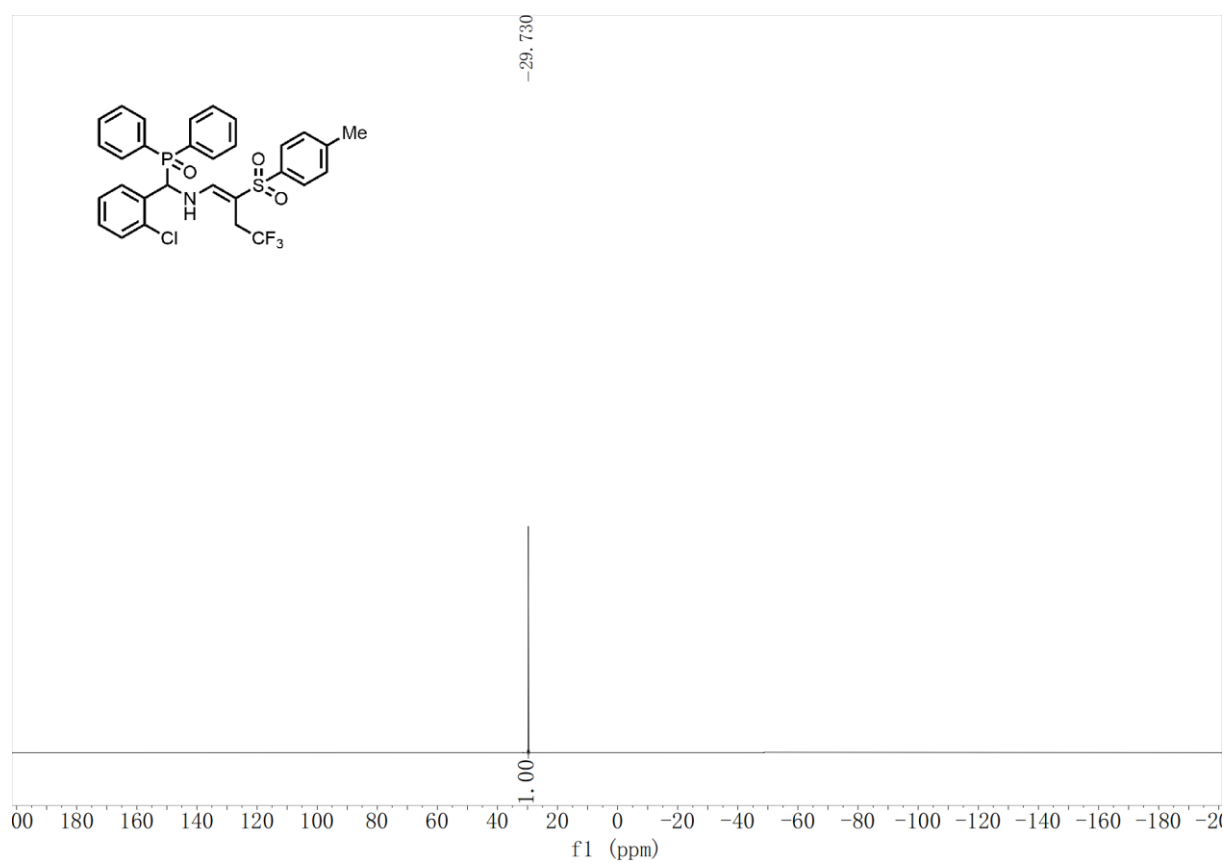

41 – <sup>1</sup>H NMR (500 MHz, DMSO)

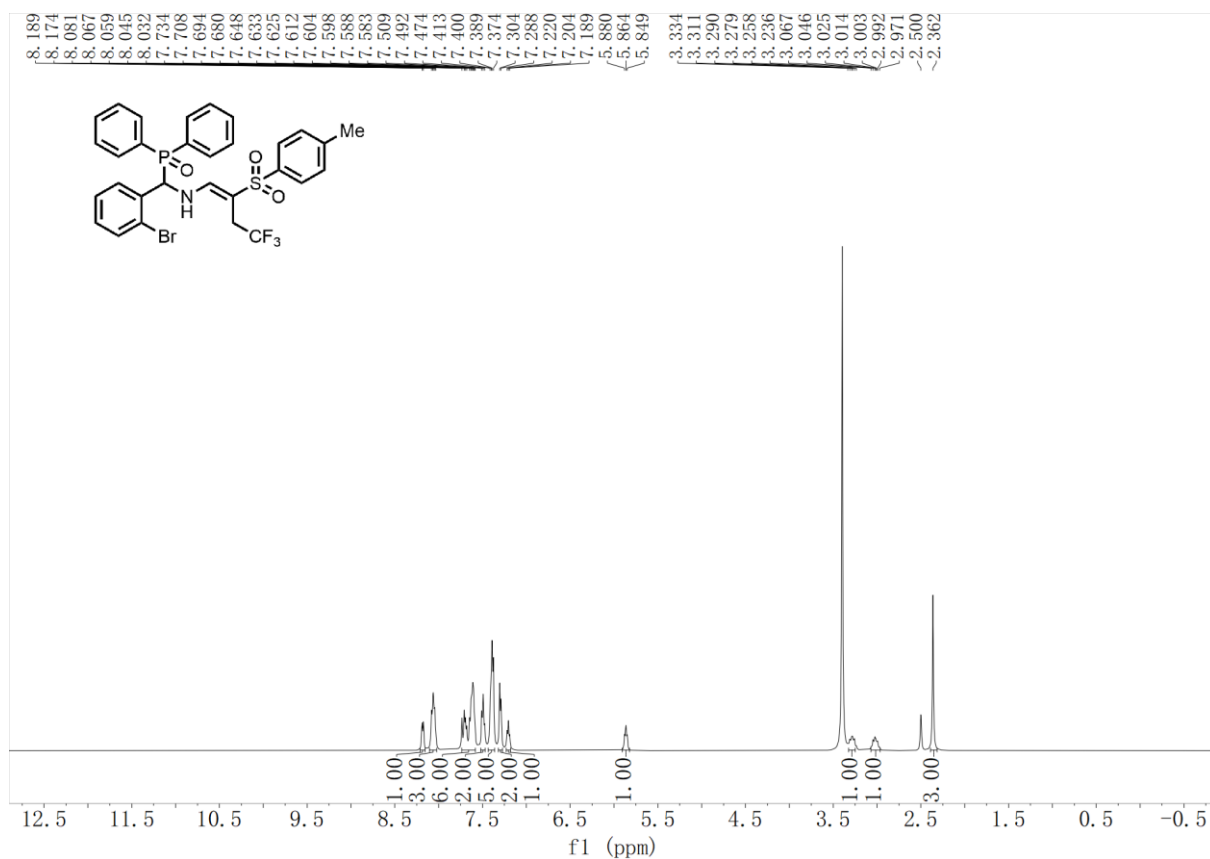

41 – <sup>13</sup>C NMR (126 MHz, DMSO)

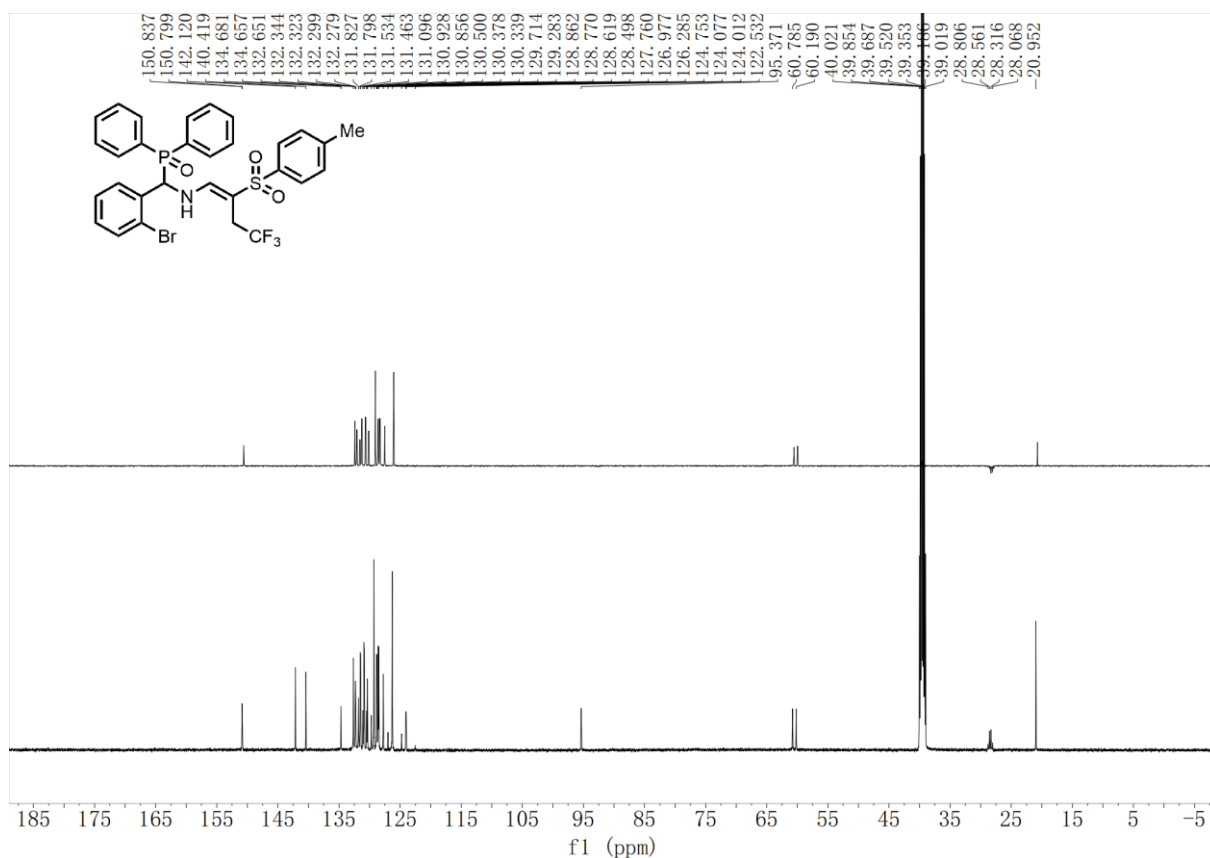

41 –  $^{19}\text{F}$  NMR (471 MHz, DMSO)

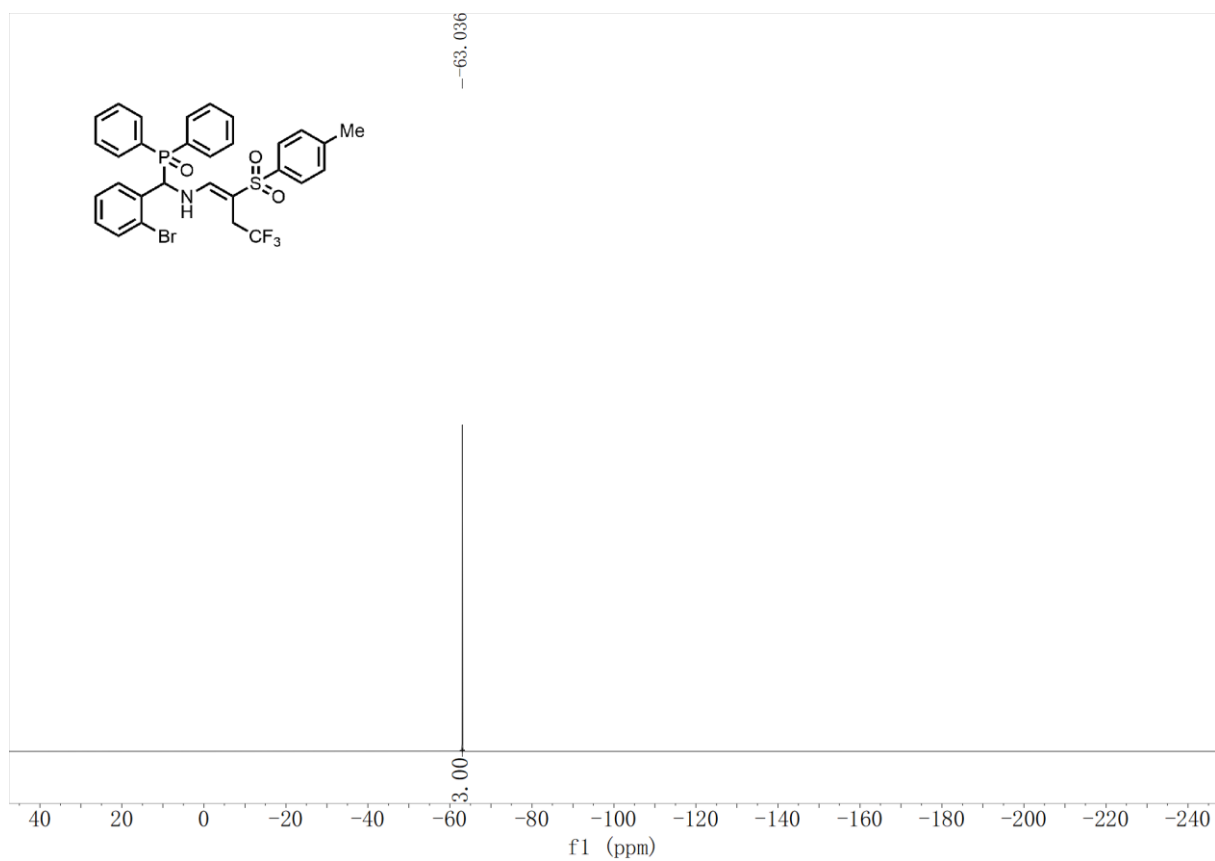

41 –  $^{31}\text{P}$  NMR (202 MHz, DMSO)

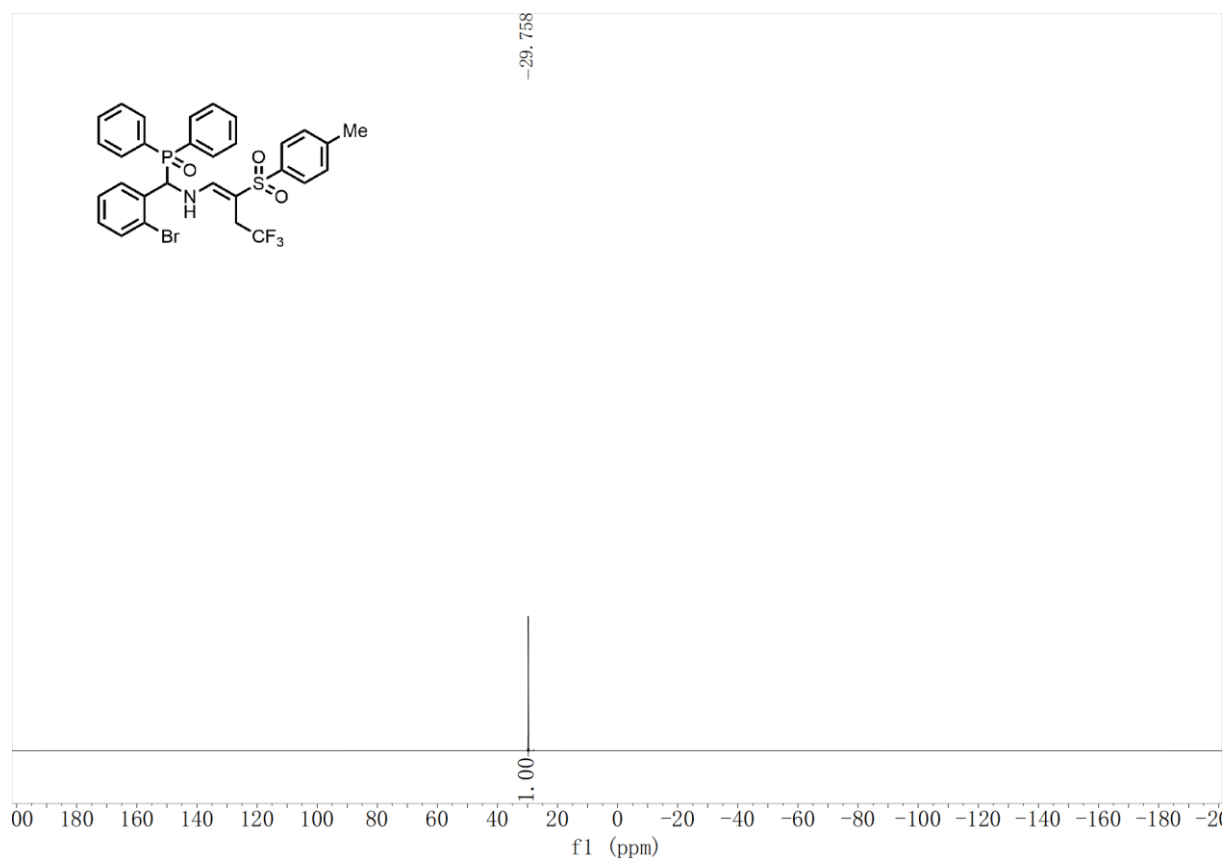

4m – <sup>1</sup>H NMR (500 MHz, DMSO)

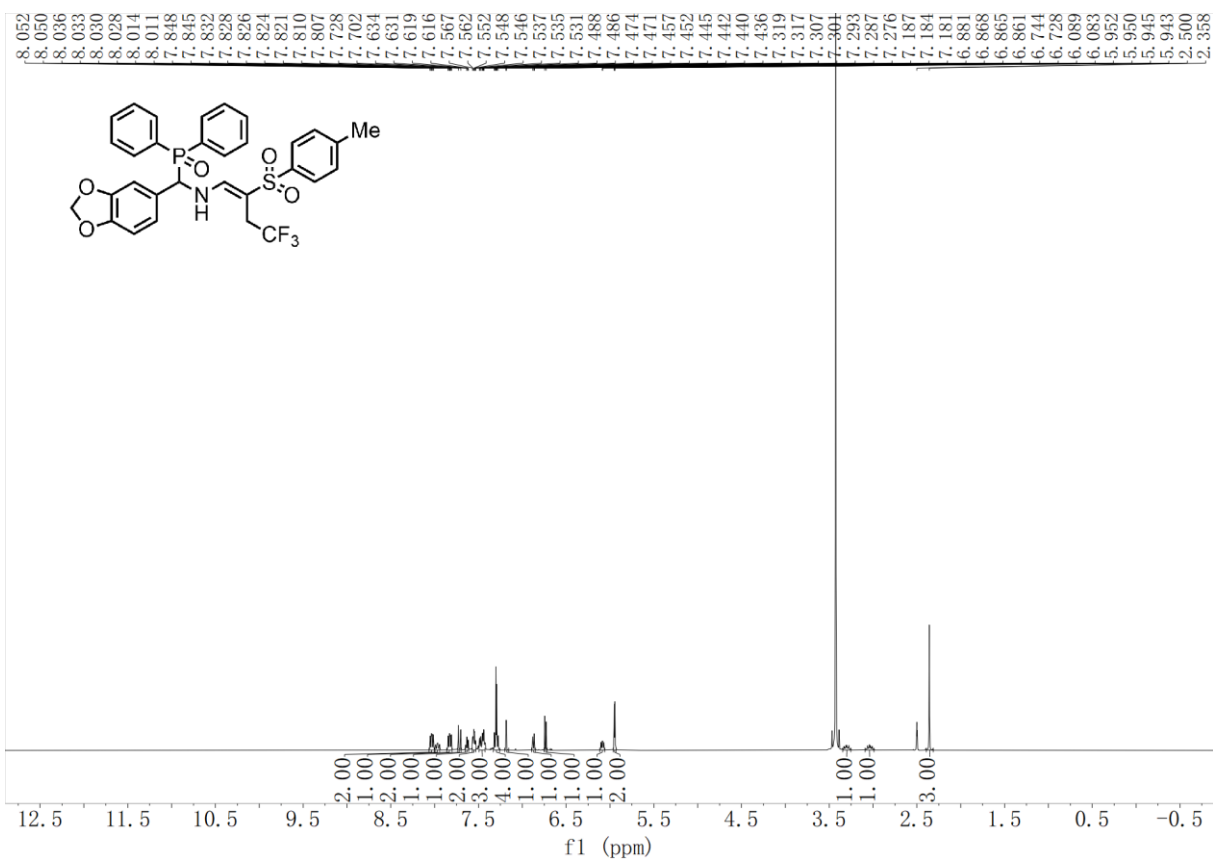

4m – <sup>13</sup>C NMR (126 MHz, DMSO)

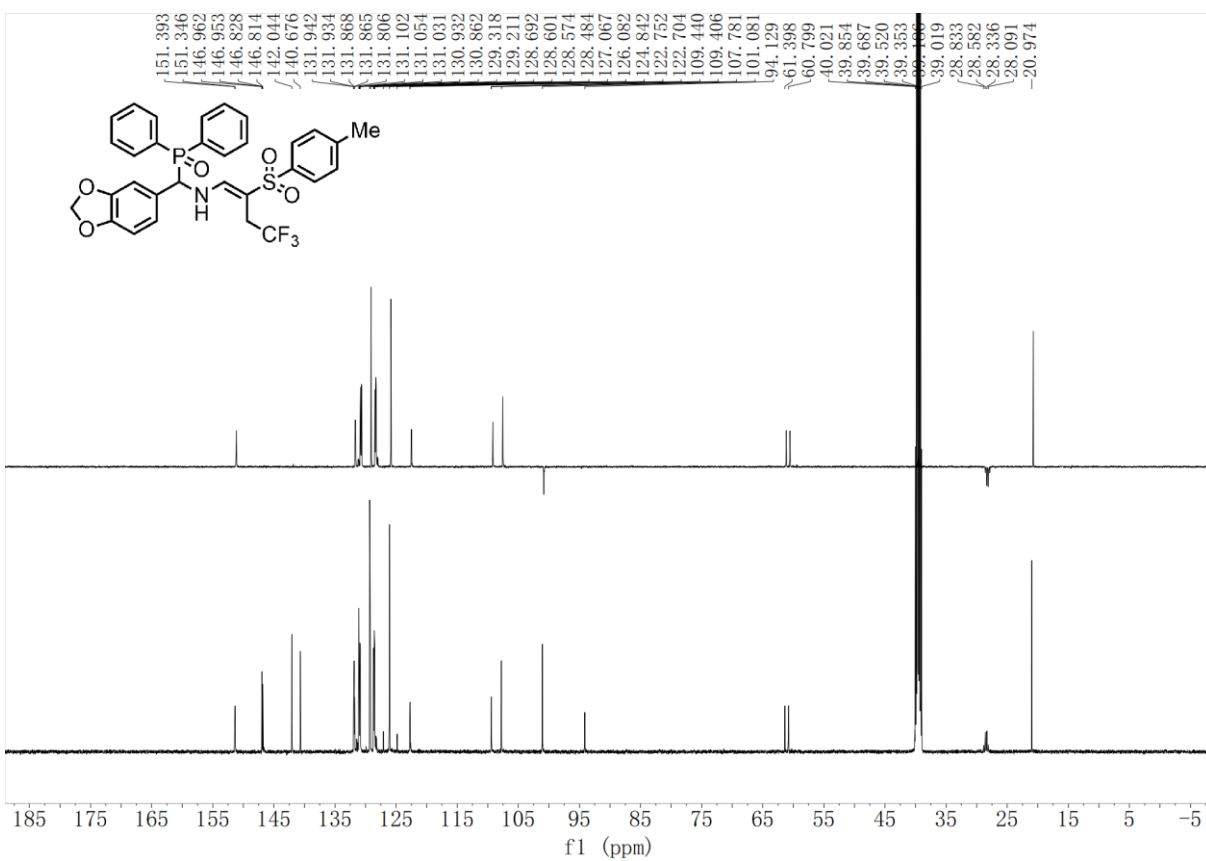

**4m** –  $^{19}\text{F}$  NMR (282 MHz, DMSO)

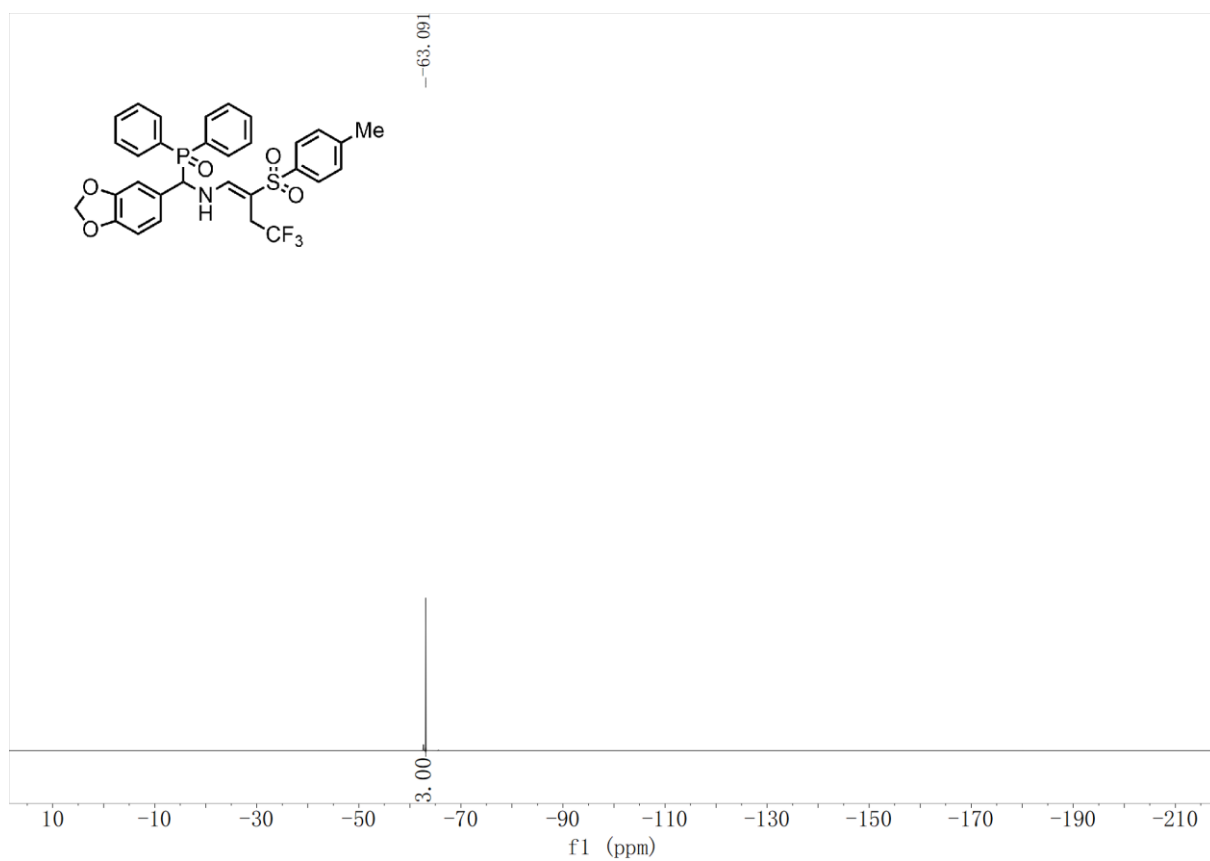

**4m** –  $^{31}\text{P}$  NMR (121 MHz, DMSO)

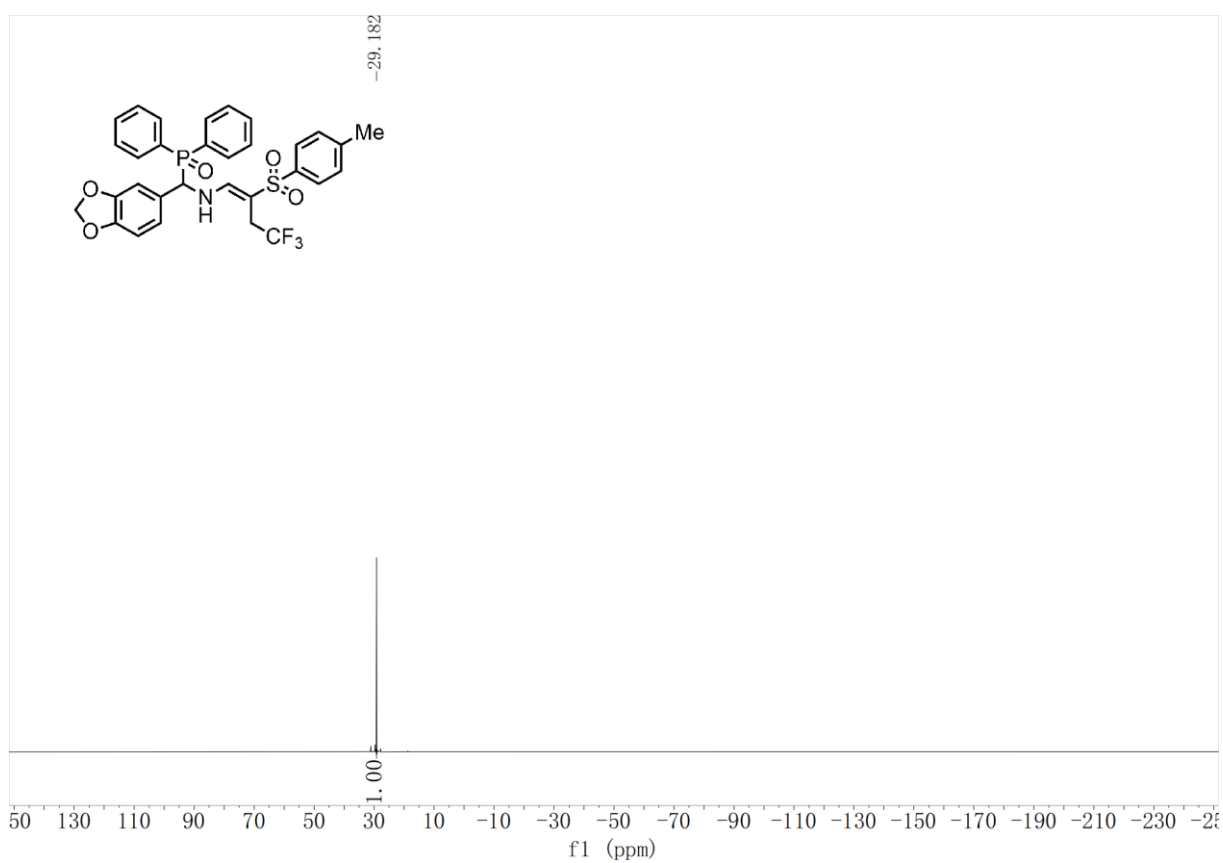

**4n** – <sup>1</sup>H NMR (500 MHz, DMSO)

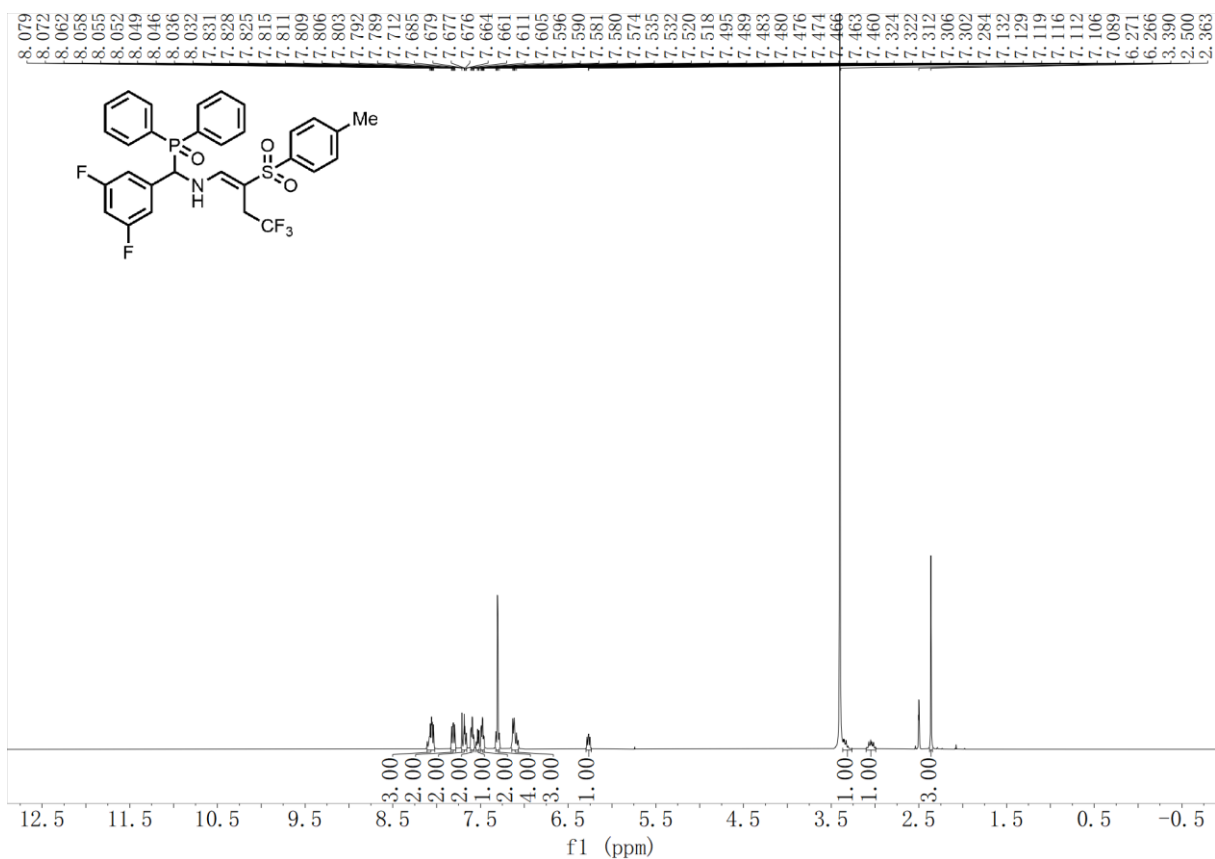

**4n** – <sup>13</sup>C NMR (126 MHz, DMSO)

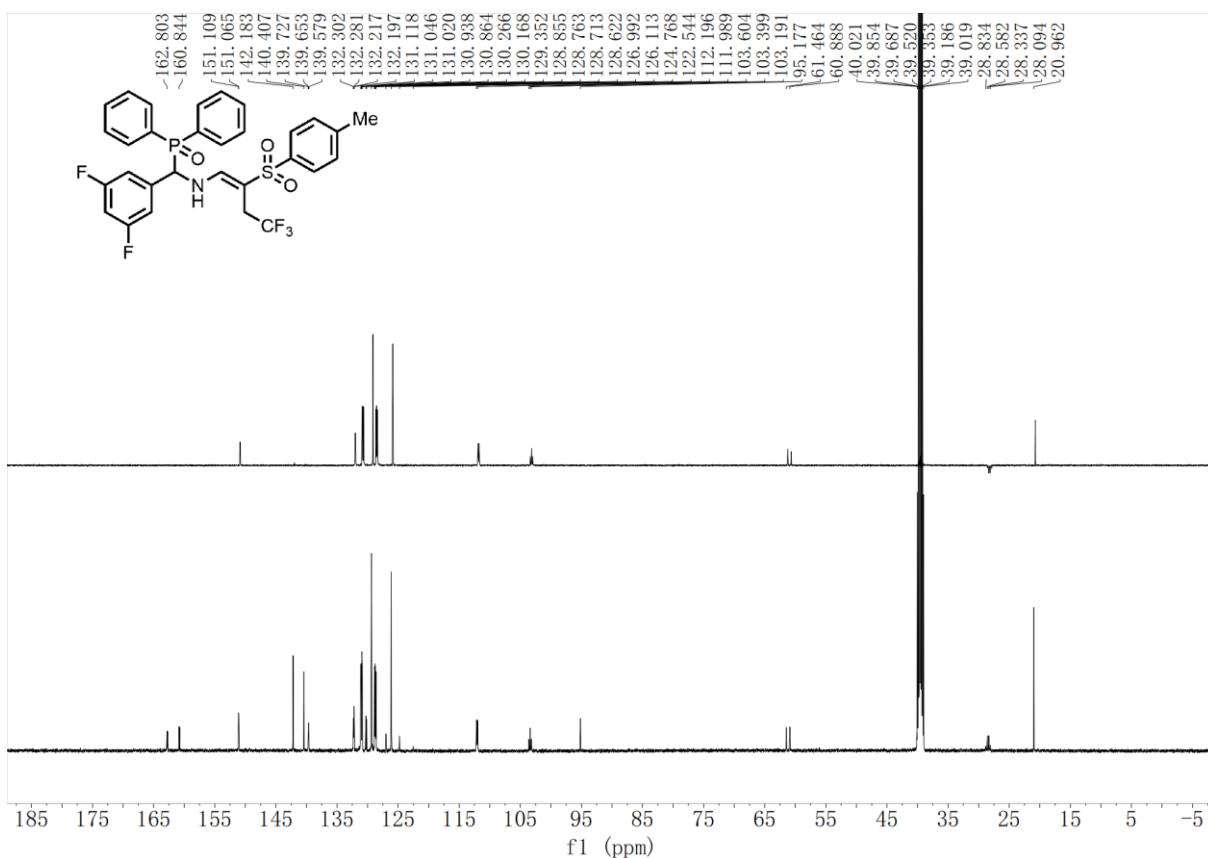

**4n** –  $^{19}\text{F}$  NMR (471 MHz, DMSO)

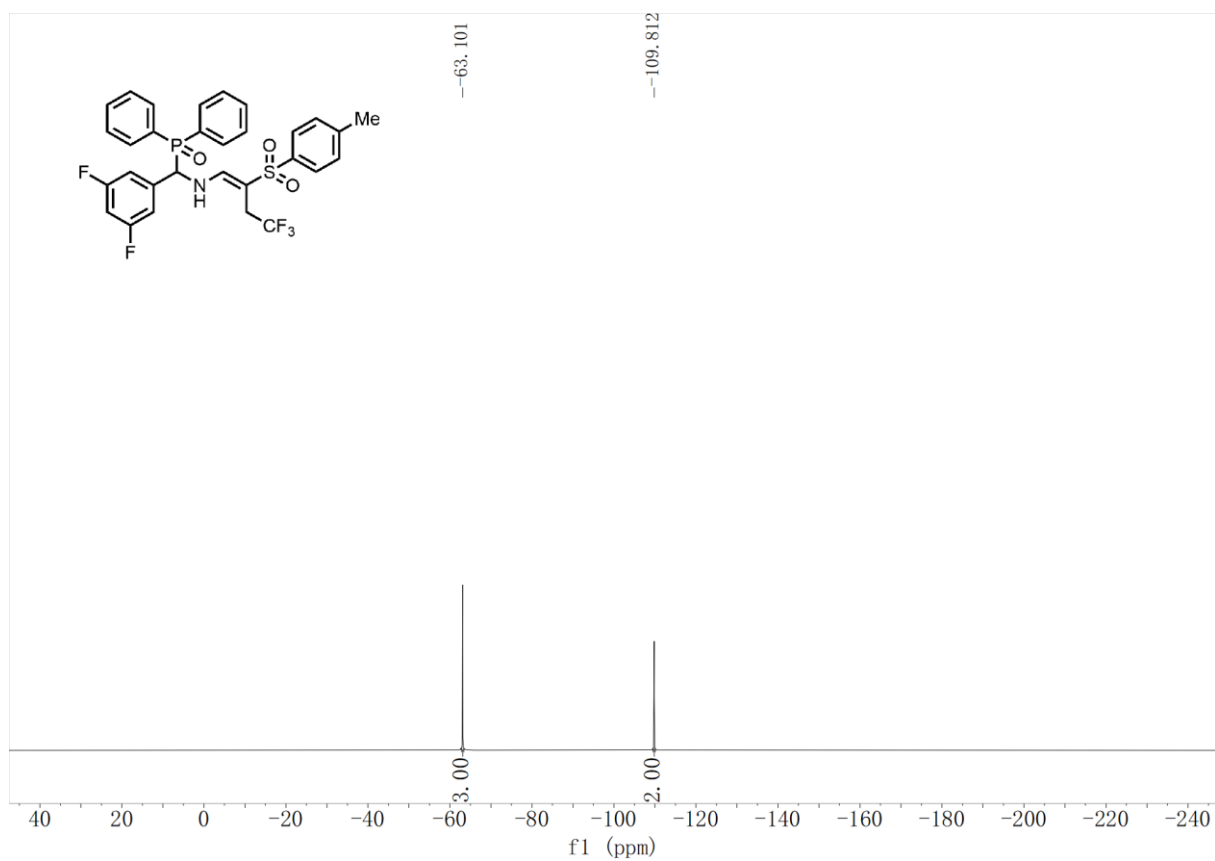

**4n** –  $^{31}\text{P}$  NMR (202 MHz, DMSO)

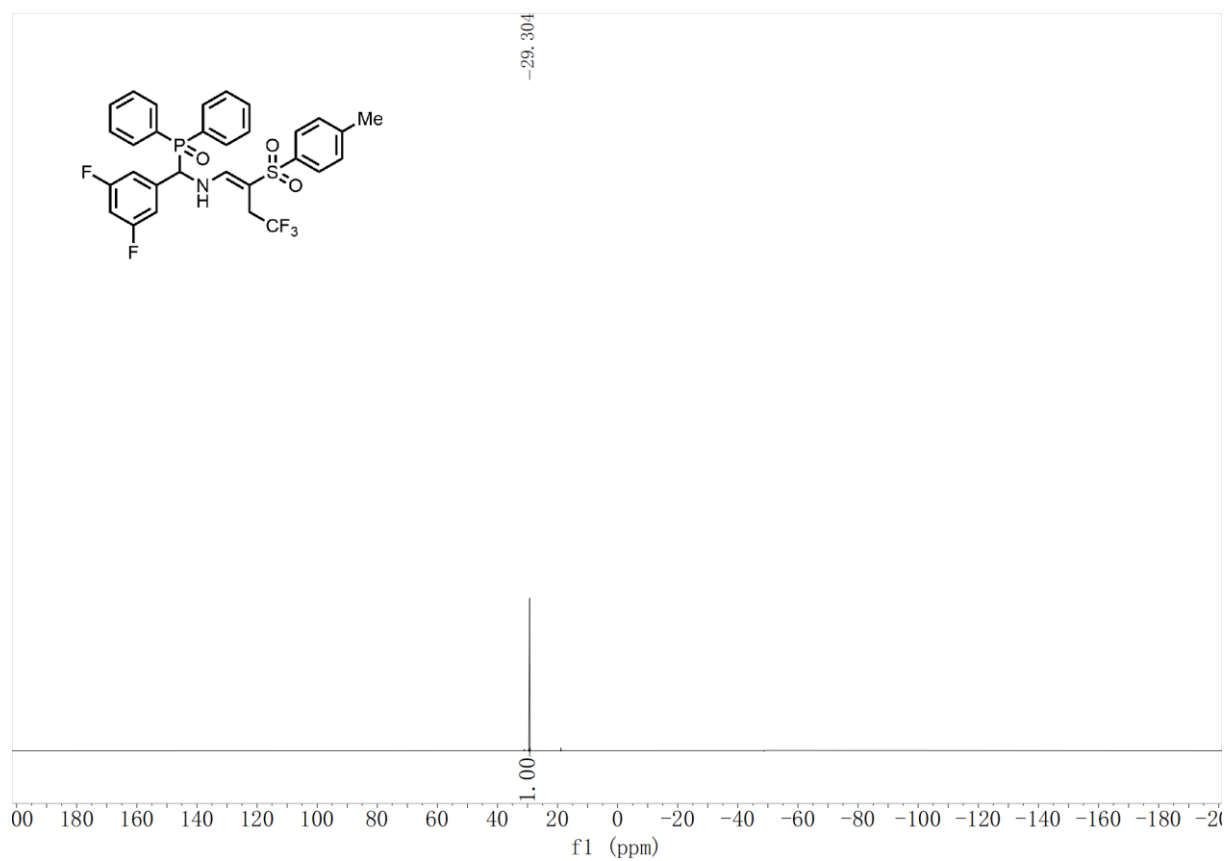

**4o** – <sup>1</sup>H NMR (500 MHz, DMSO)

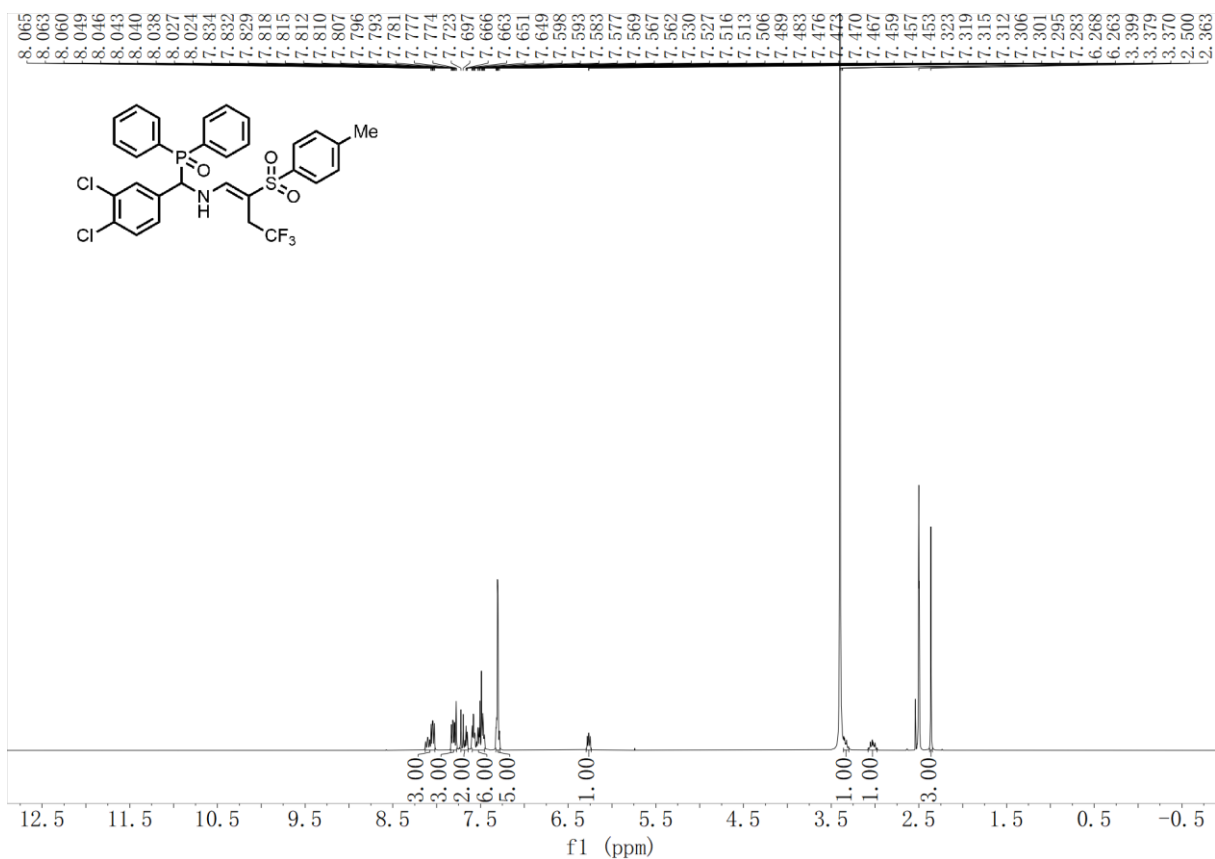

**4o** – <sup>13</sup>C NMR (126 MHz, DMSO)

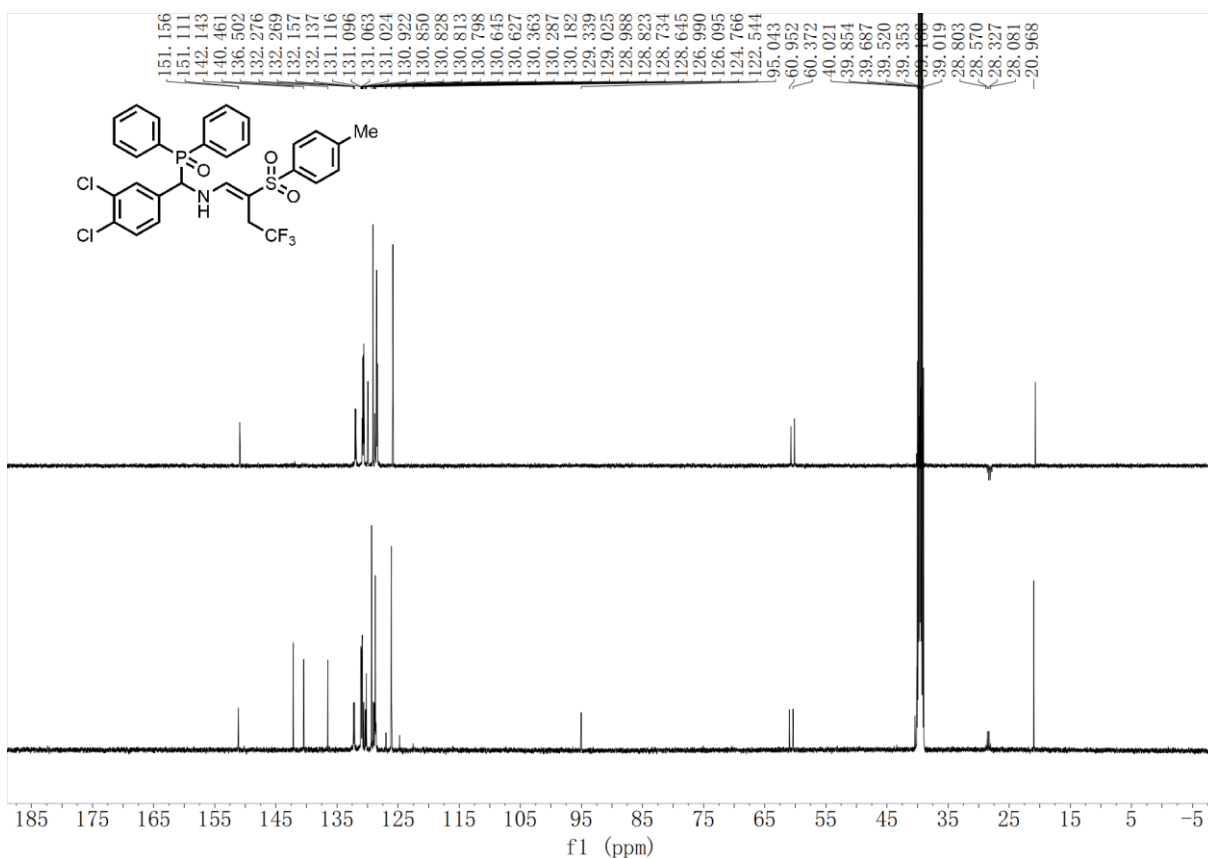



**4o** –  $^{19}\text{F}$  NMR (471 MHz, DMSO)

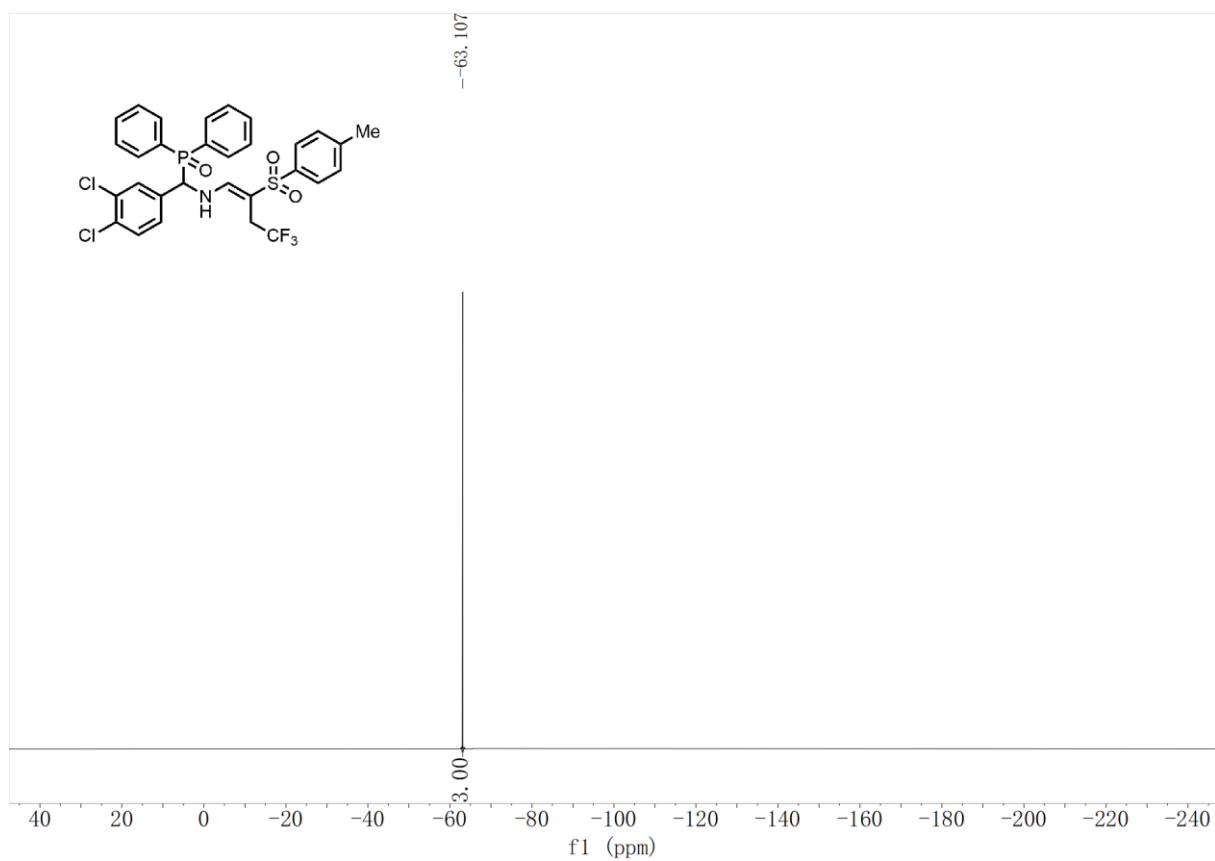

**4o** –  $^{31}\text{P}$  NMR (202 MHz, DMSO)

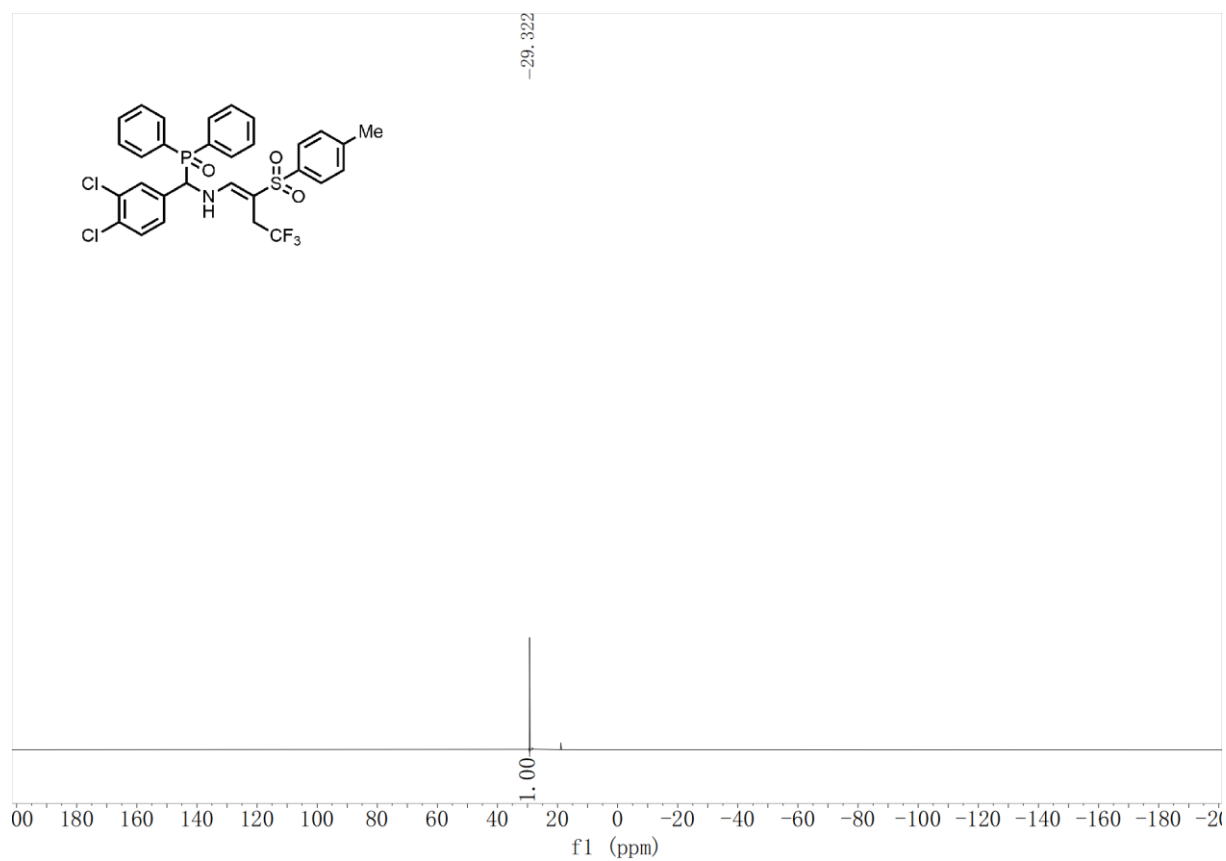

**4p** –  $^1\text{H}$  NMR (500 MHz, DMSO)

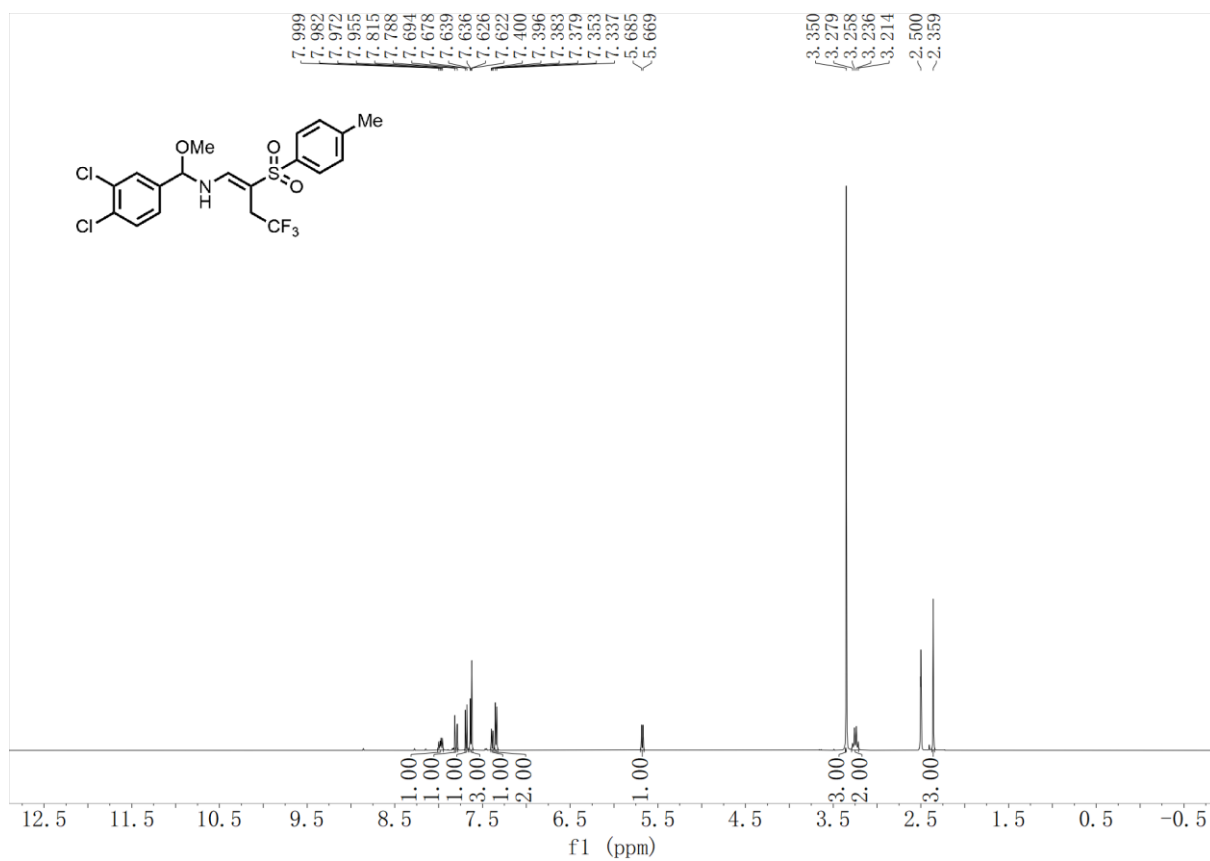

**4p** –  $^{13}\text{C}$  NMR (126 MHz, DMSO)

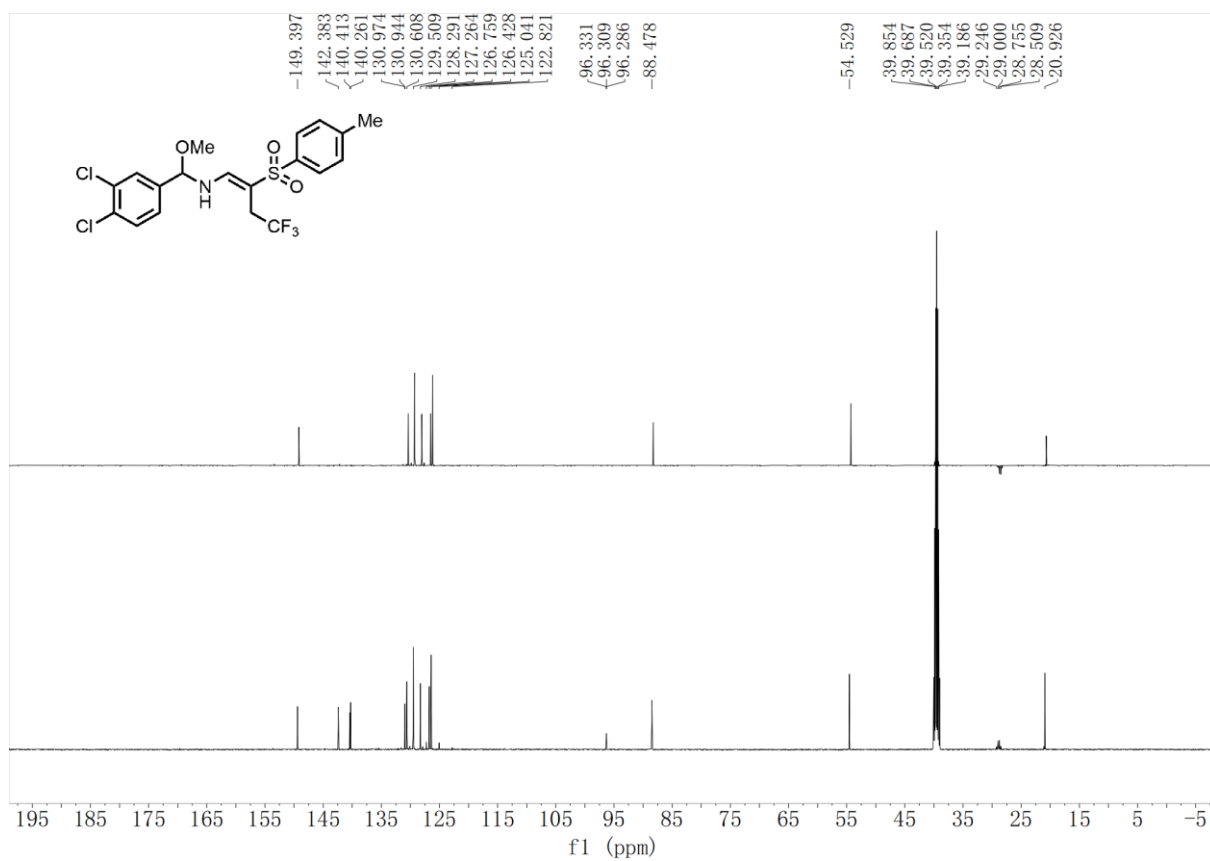

4p – <sup>19</sup>F NMR (471 MHz, DMSO)

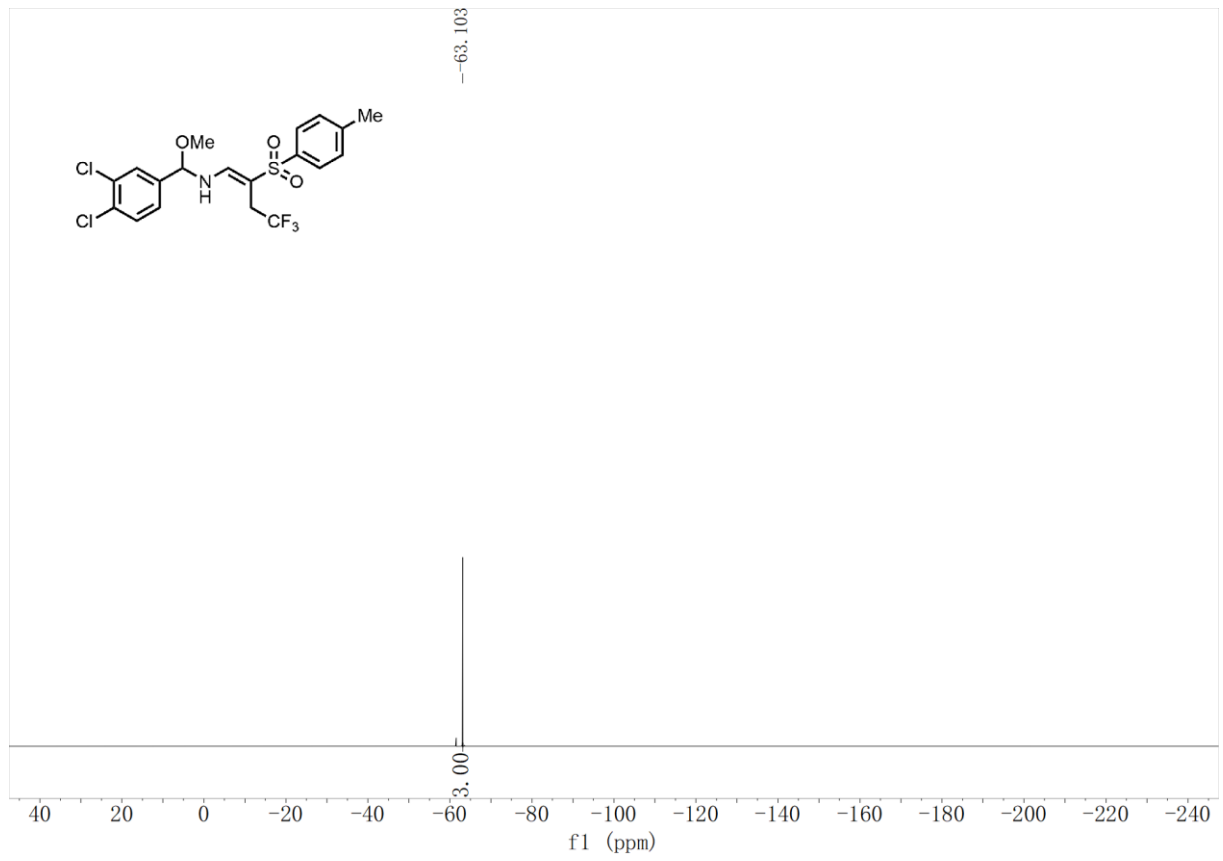

**4q** – <sup>1</sup>H NMR (500 MHz, DMSO)

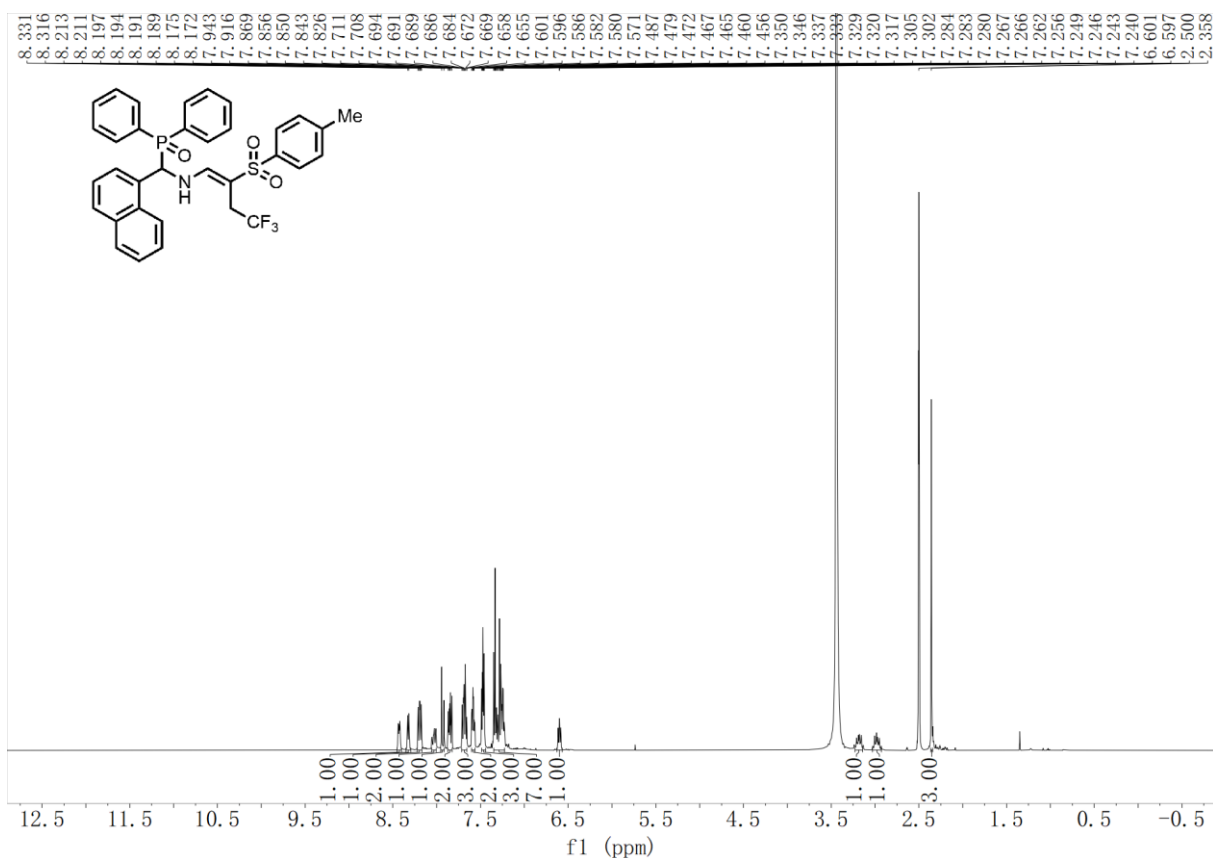

**4q** – <sup>13</sup>C NMR (126 MHz, DMSO)

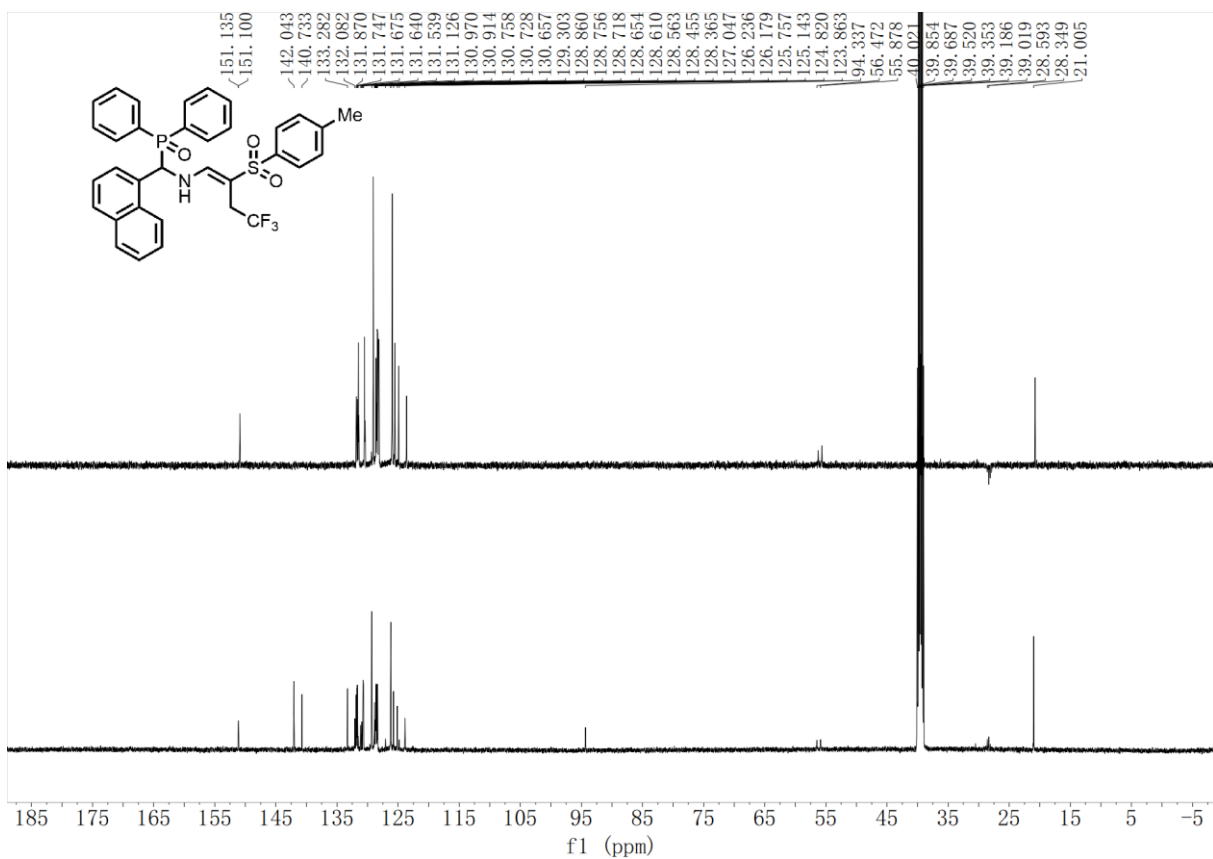

**4q** –  $^{19}\text{F}$  NMR (471 MHz, DMSO)

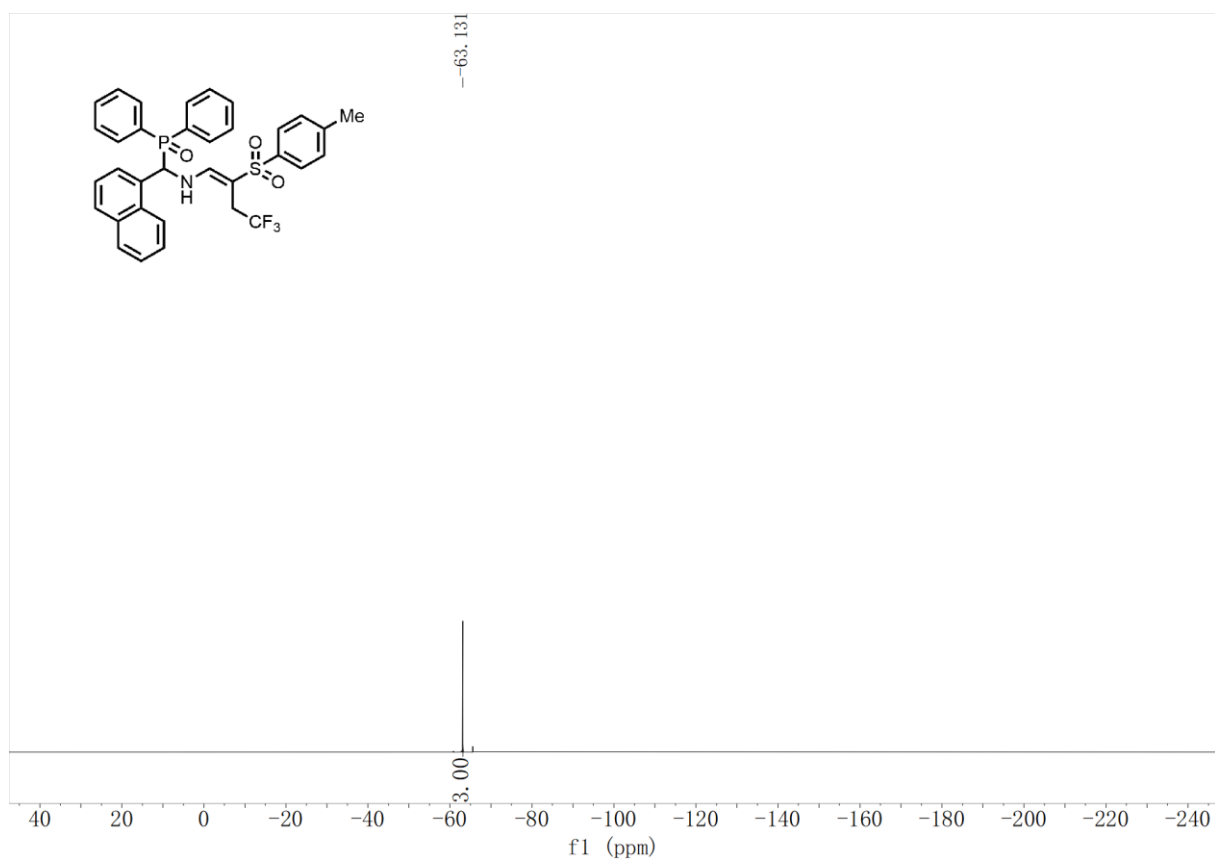

**4q** –  $^{31}\text{P}$  NMR (202 MHz, DMSO)

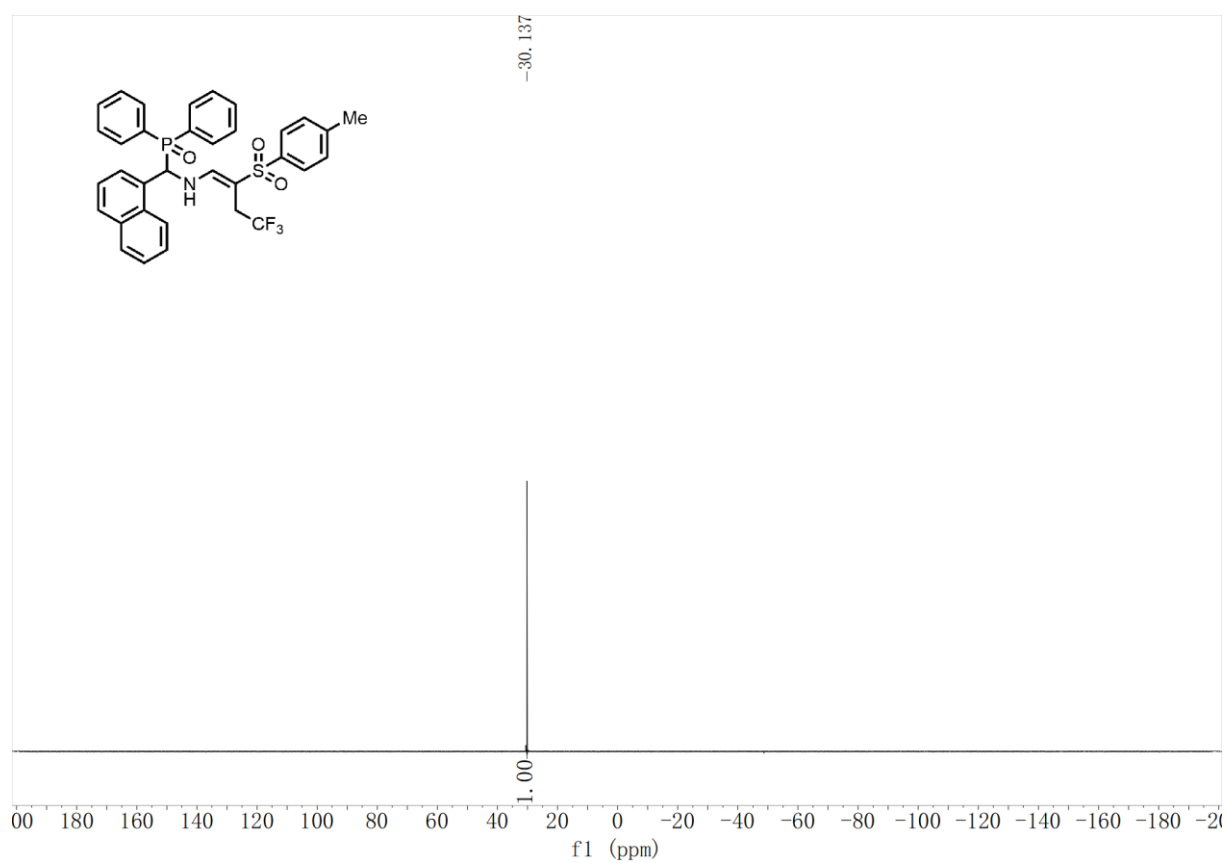

**4r** – <sup>1</sup>H NMR (500 MHz, DMSO)

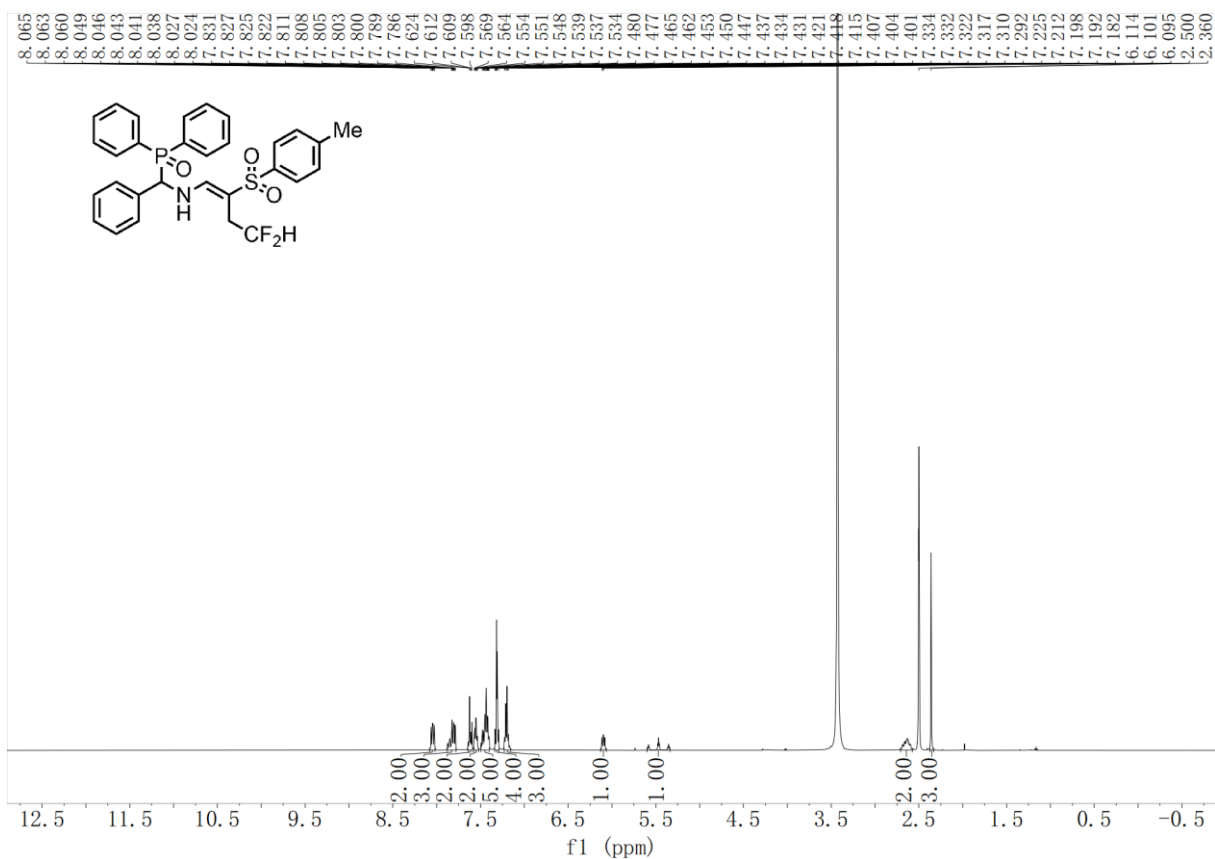

**4r** – <sup>13</sup>C NMR (126 MHz, DMSO)

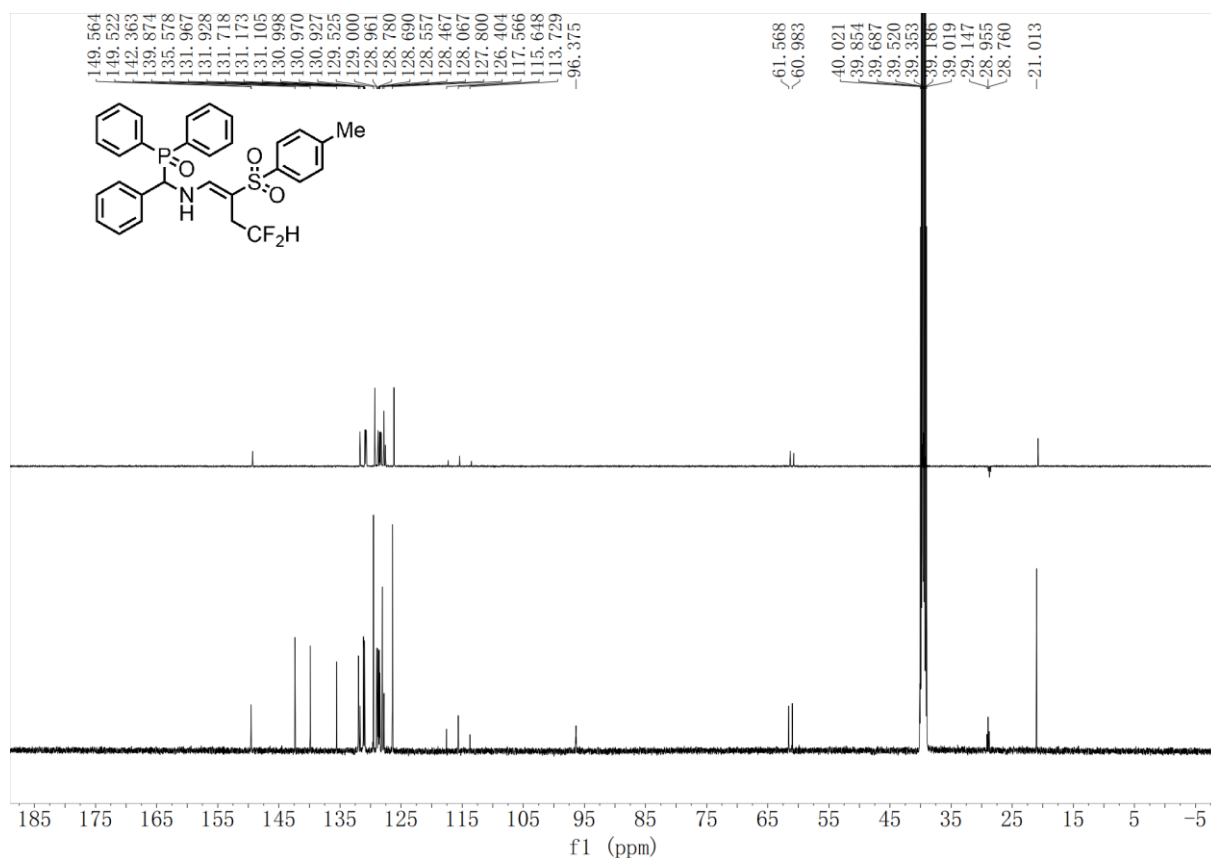

4r –  $^{19}\text{F}$  NMR (471 MHz, DMSO)

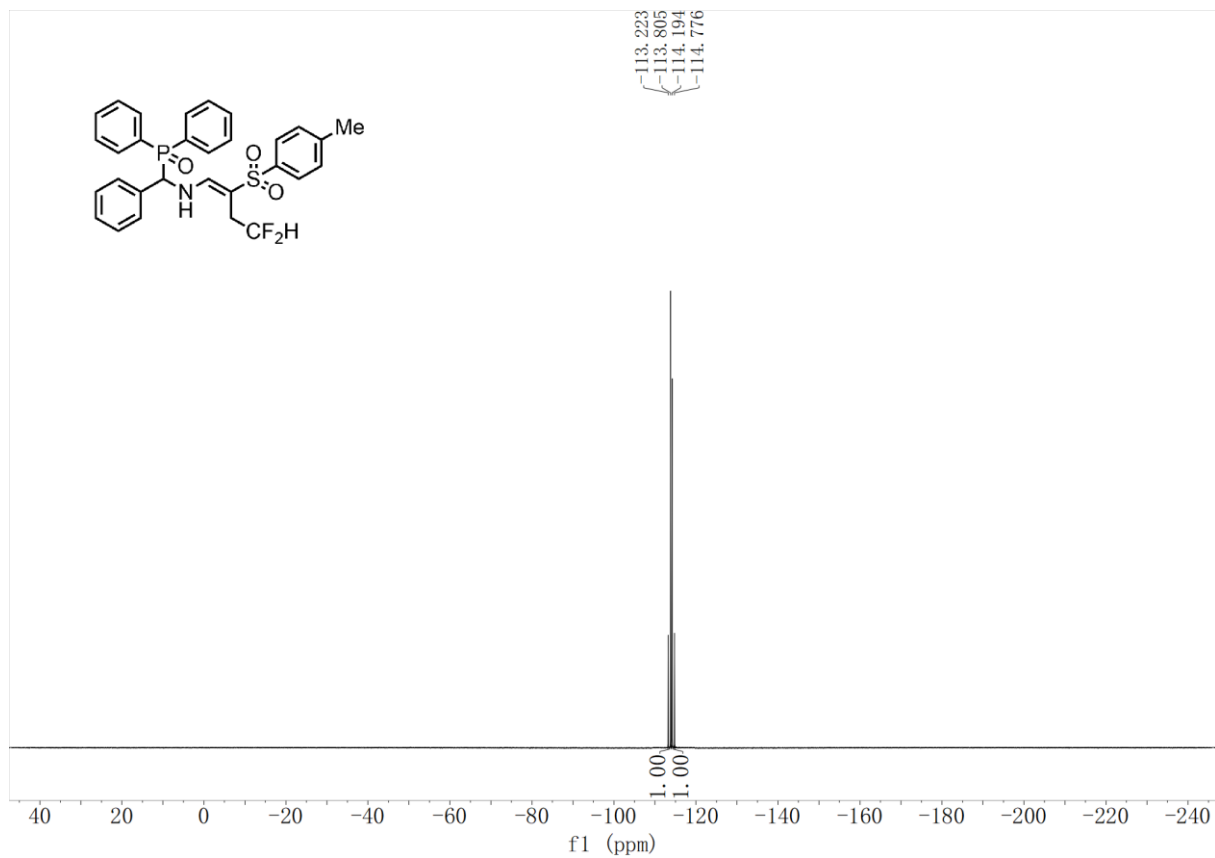

4r –  $^{31}\text{P}$  NMR (202 MHz, DMSO)

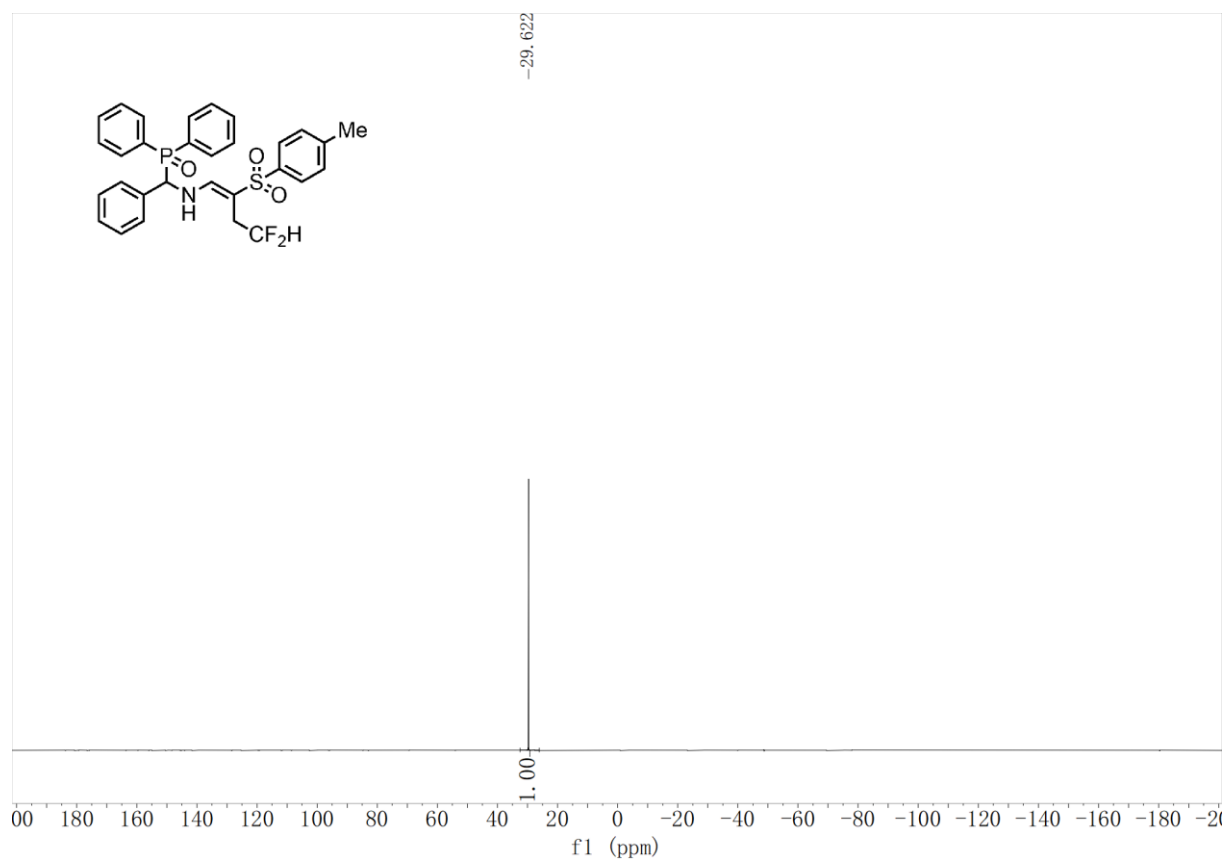

**4t** – <sup>1</sup>H NMR (500 MHz, DMSO)

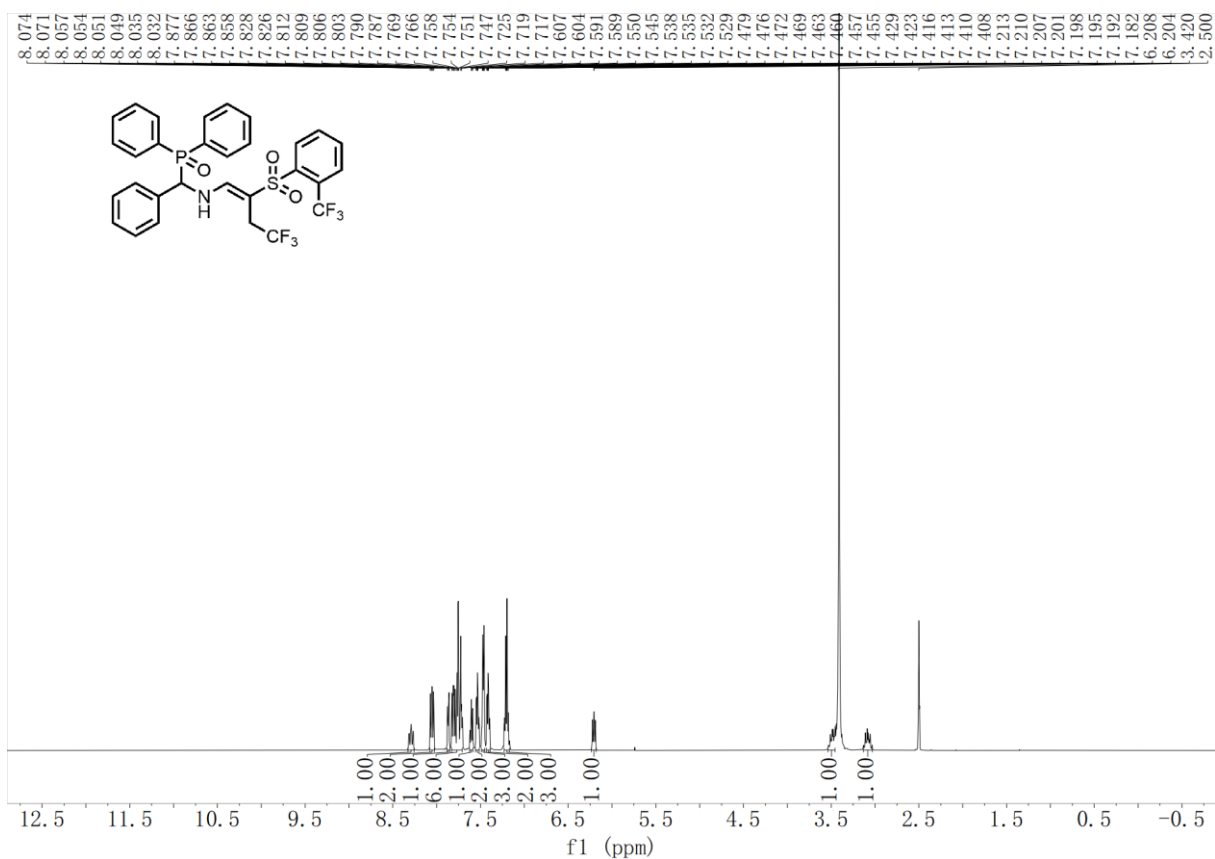

**4t** – <sup>13</sup>C NMR (126 MHz, DMSO)

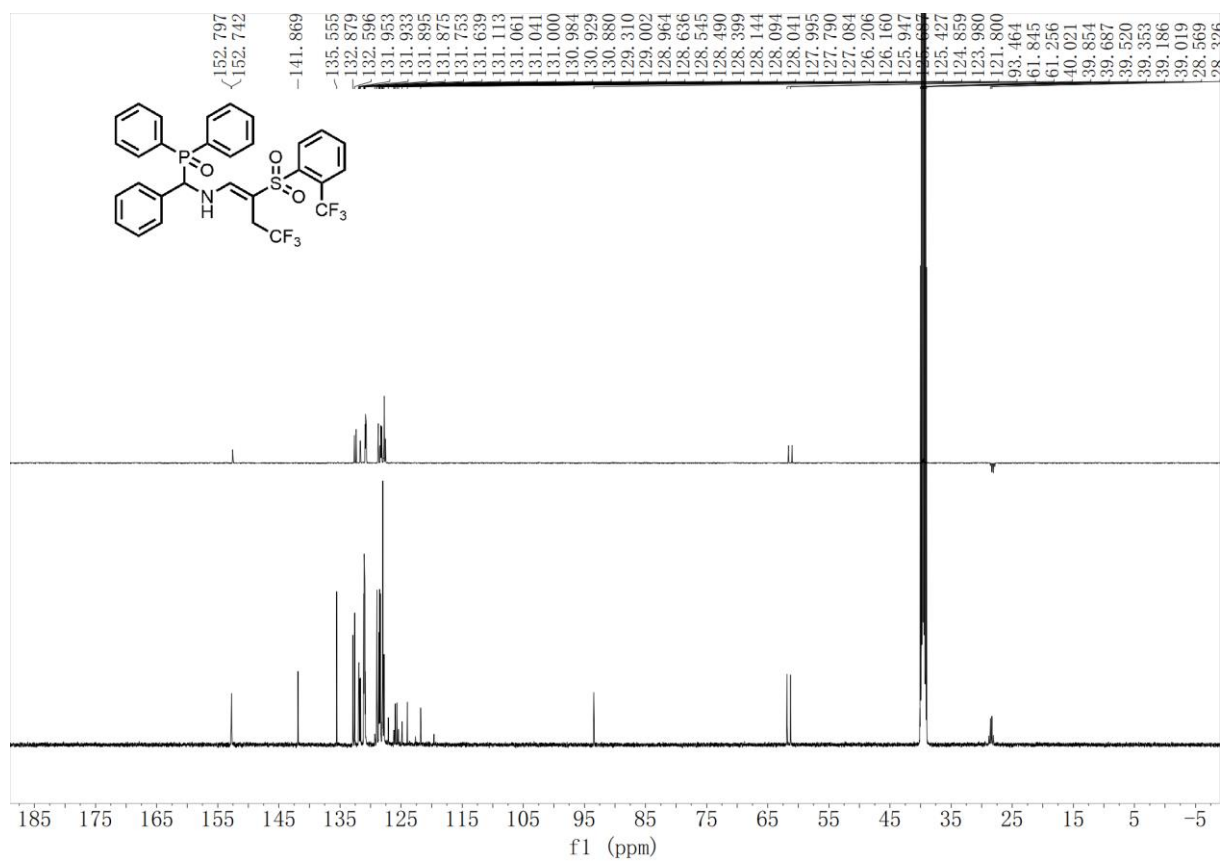



**4t** –  $^{19}\text{F}$  NMR (282 MHz, DMSO)

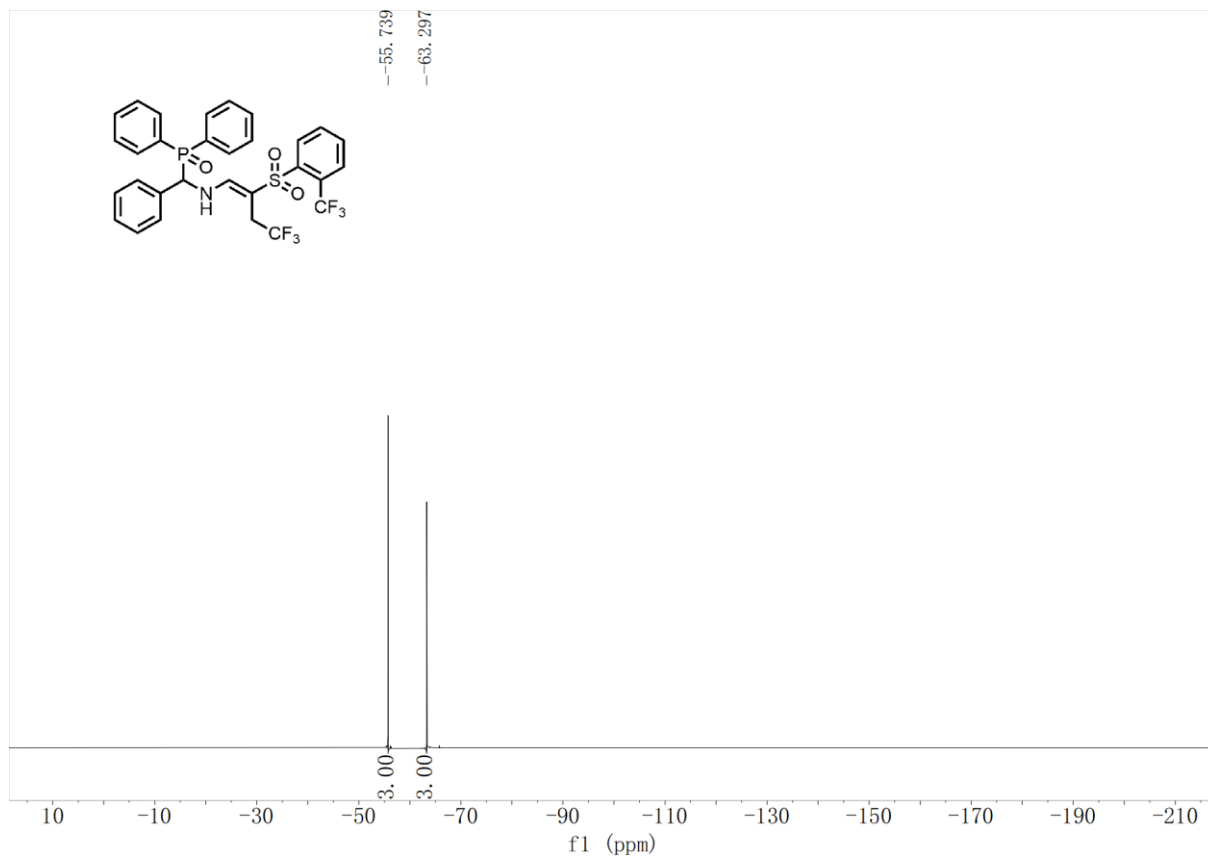

**4t** –  $^{31}\text{P}$  NMR (121 MHz, DMSO)

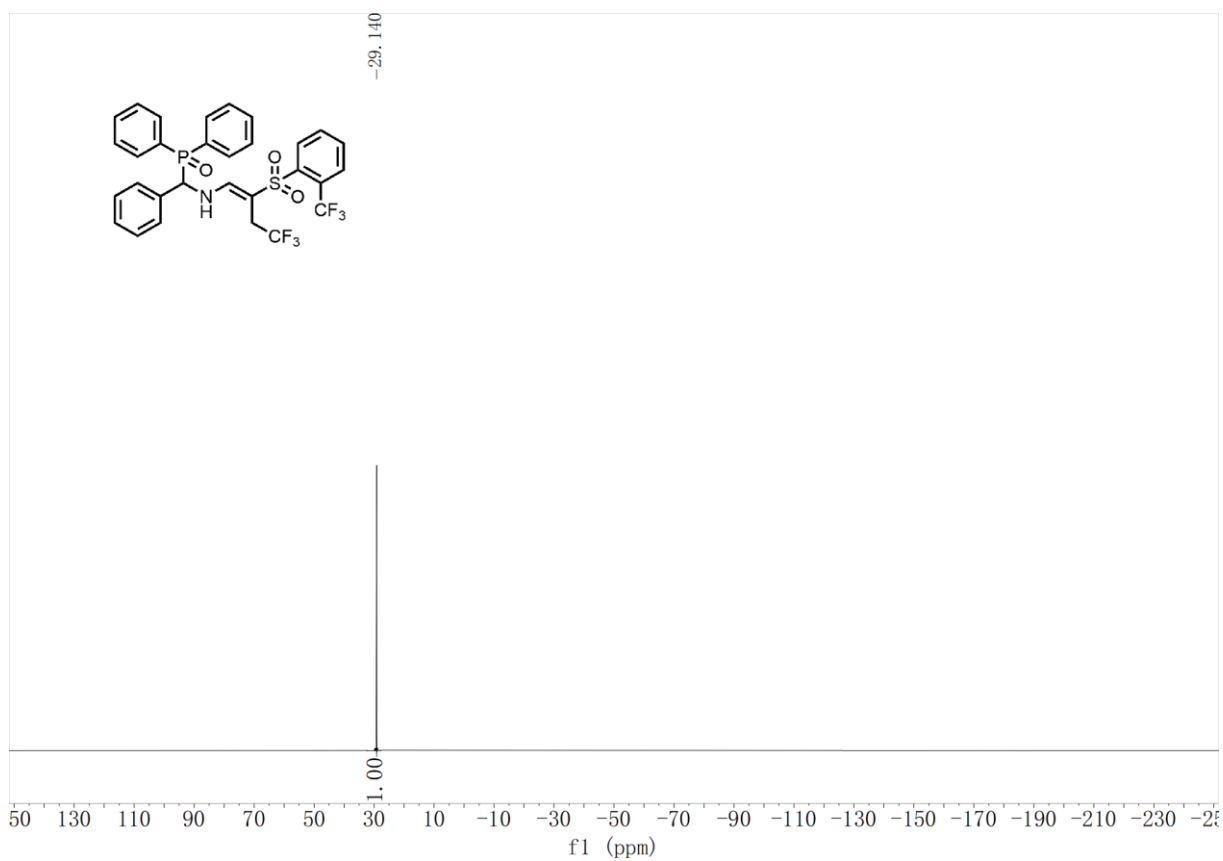

4u – <sup>1</sup>H NMR (500 MHz, DMSO)

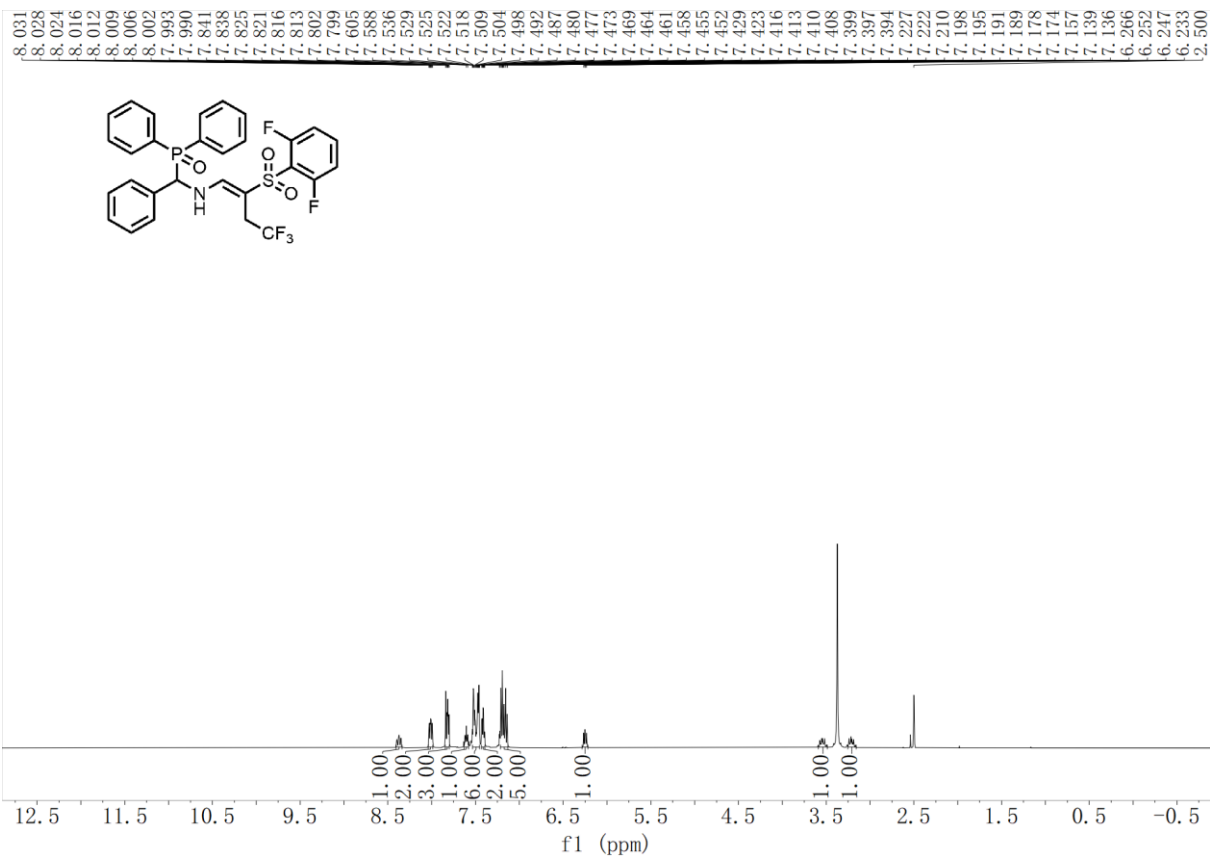

4u – <sup>13</sup>C NMR (126 MHz, DMSO)

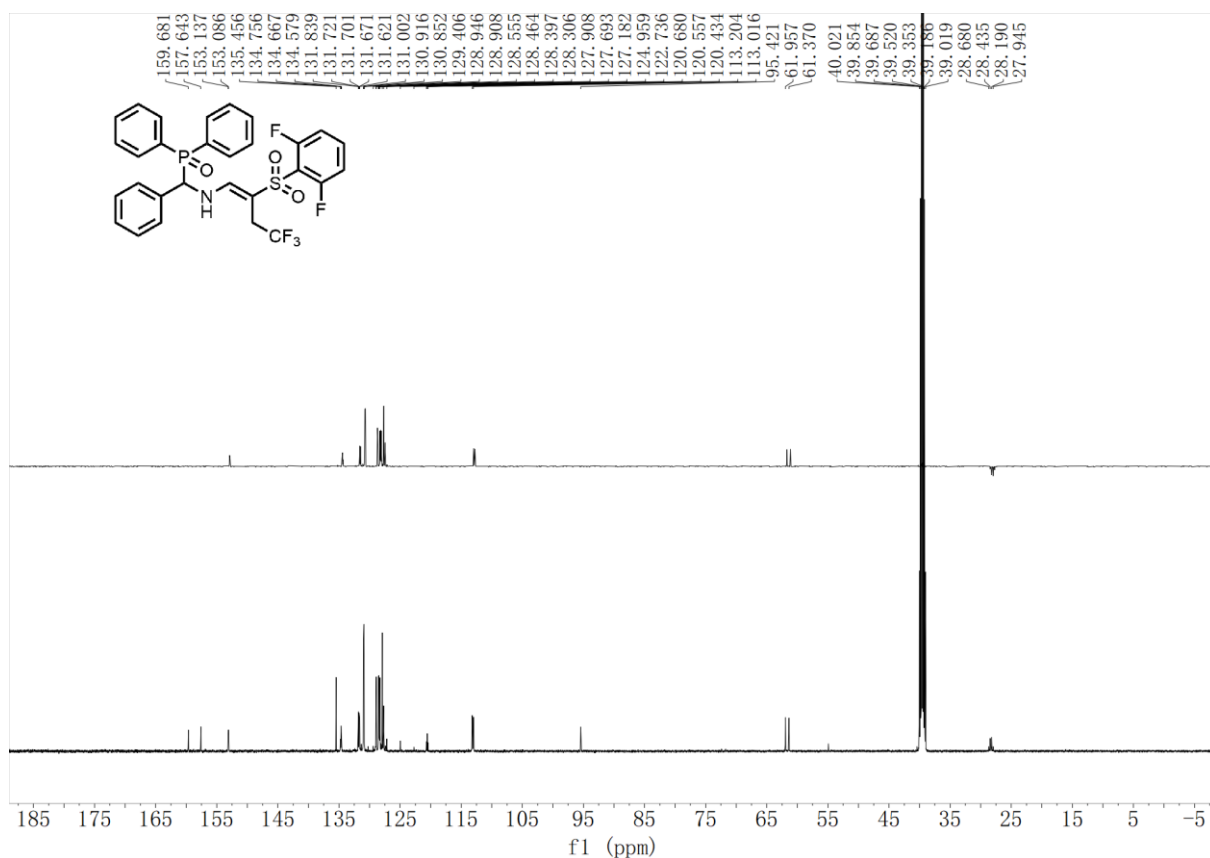

**4u** –  $^{19}\text{F}$  NMR (282 MHz, DMSO)

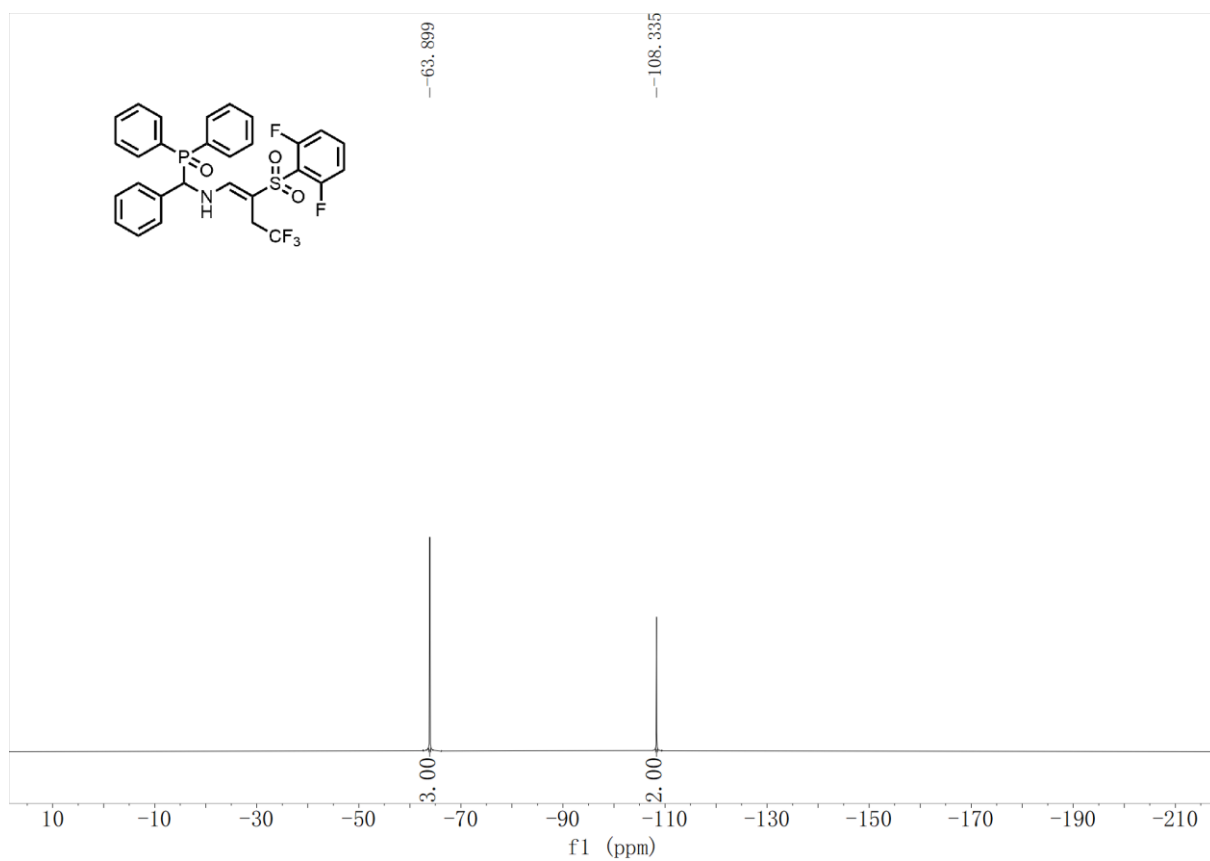

**4u** –  $^{31}\text{P}$  NMR (121 MHz, DMSO)

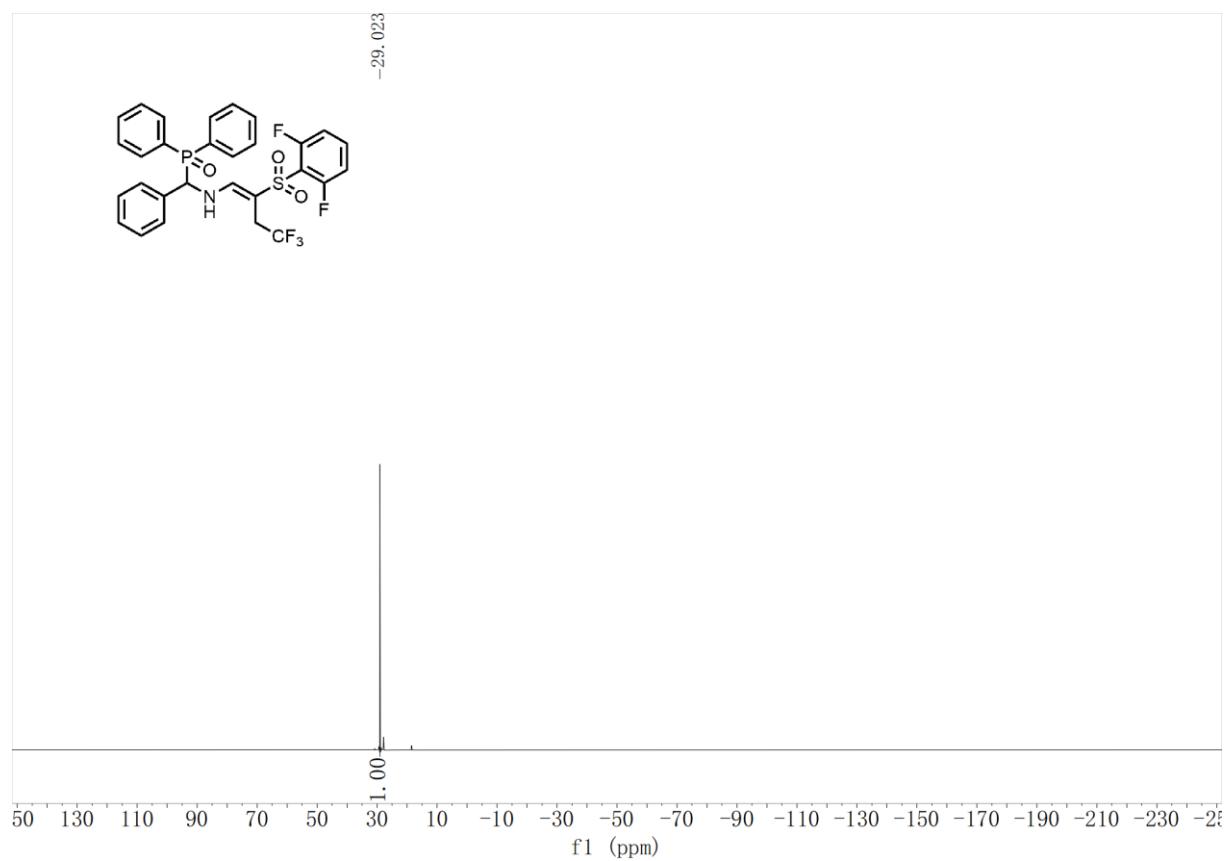

4v – <sup>1</sup>H NMR (500 MHz, DMSO)

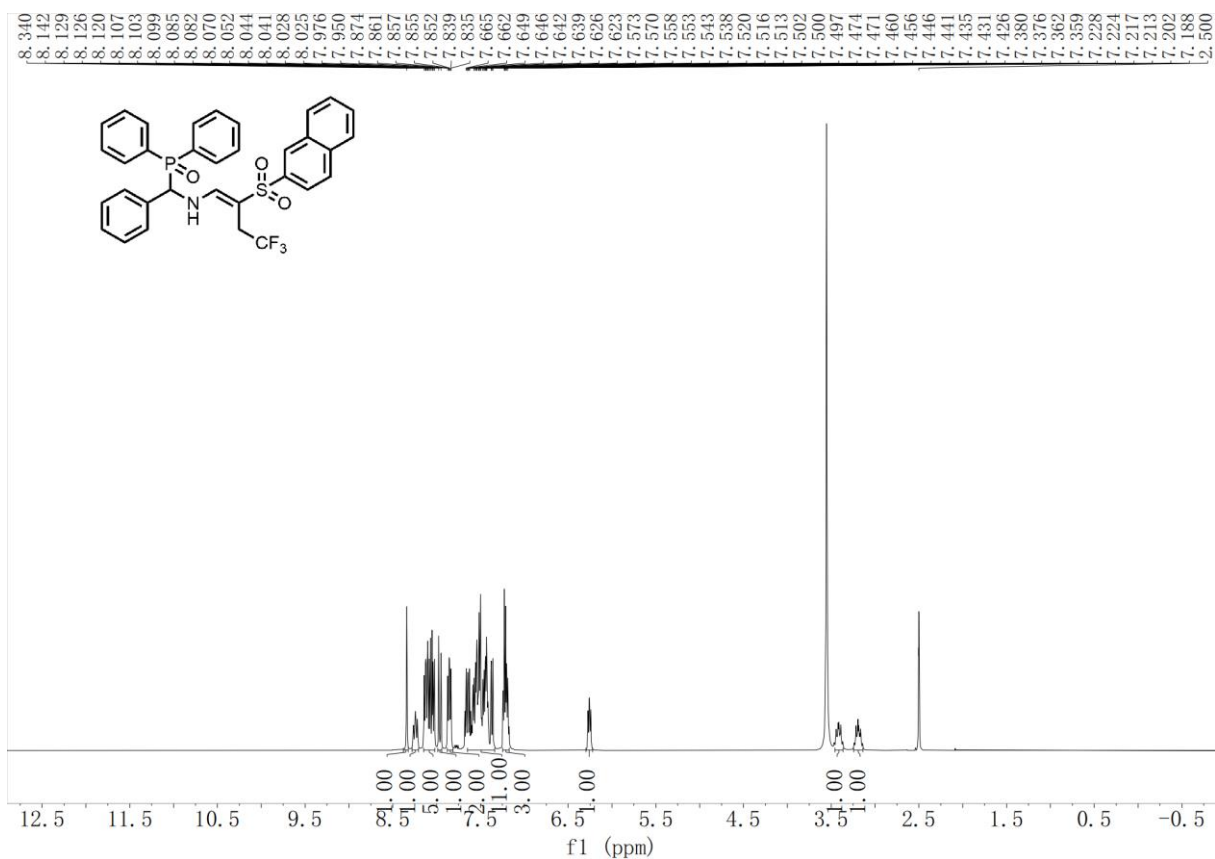

4v – <sup>13</sup>C NMR (126 MHz, DMSO)

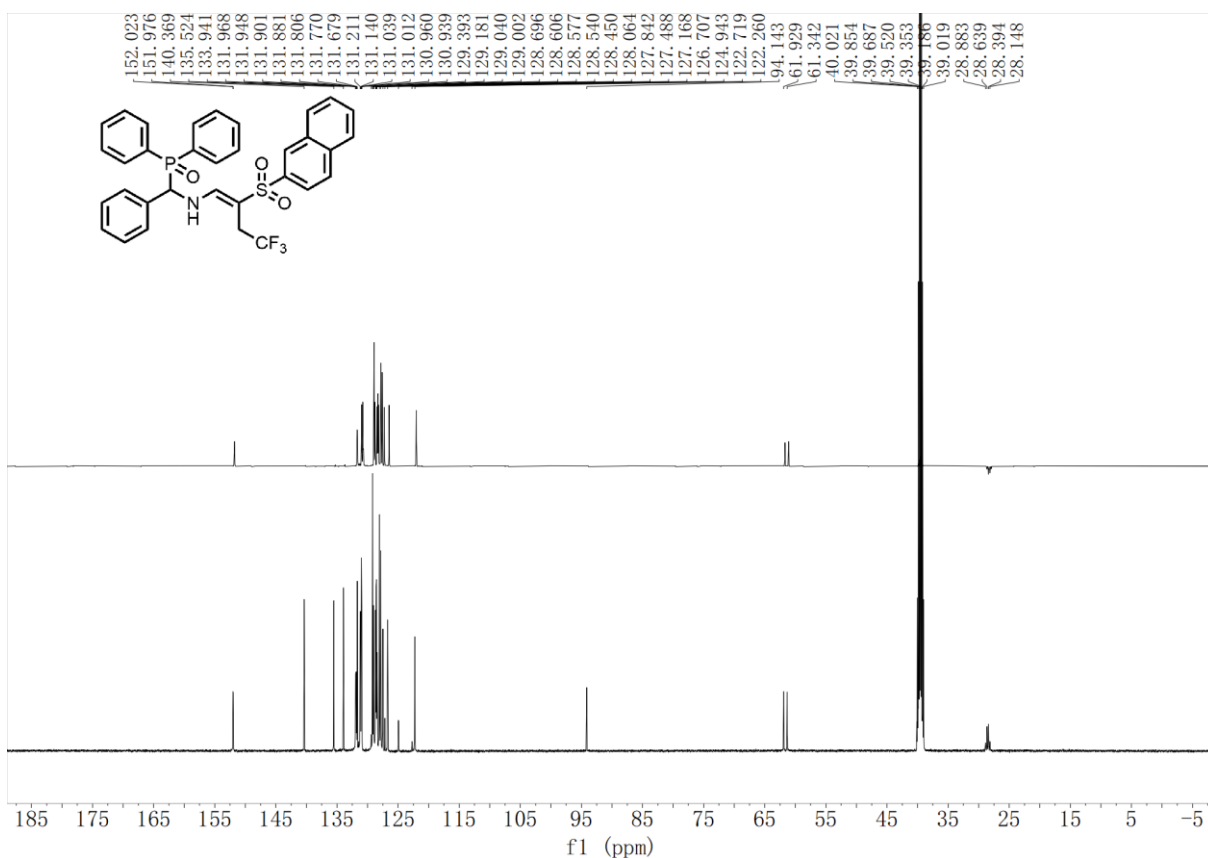

**4v** –  $^{19}\text{F}$  NMR (471 MHz, DMSO)

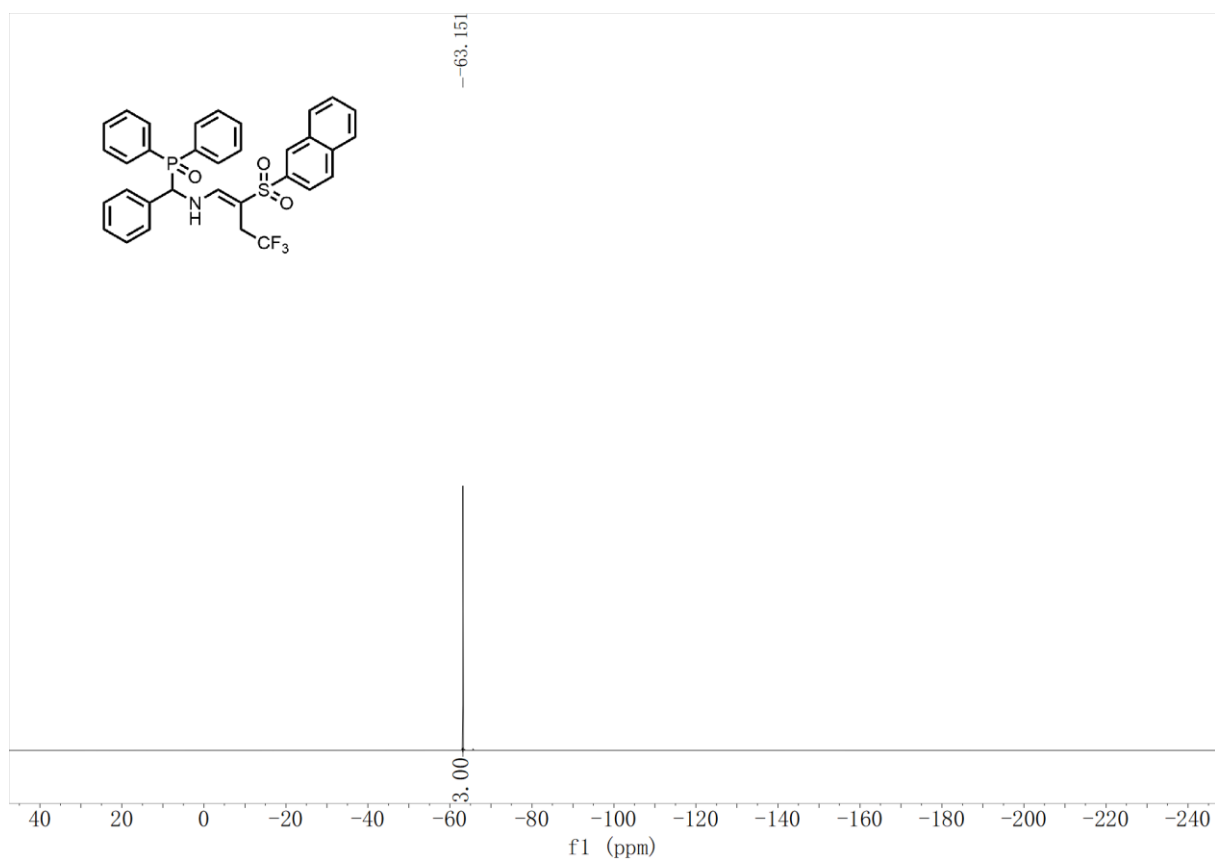

**4v** –  $^{31}\text{P}$  NMR (202 MHz, DMSO)

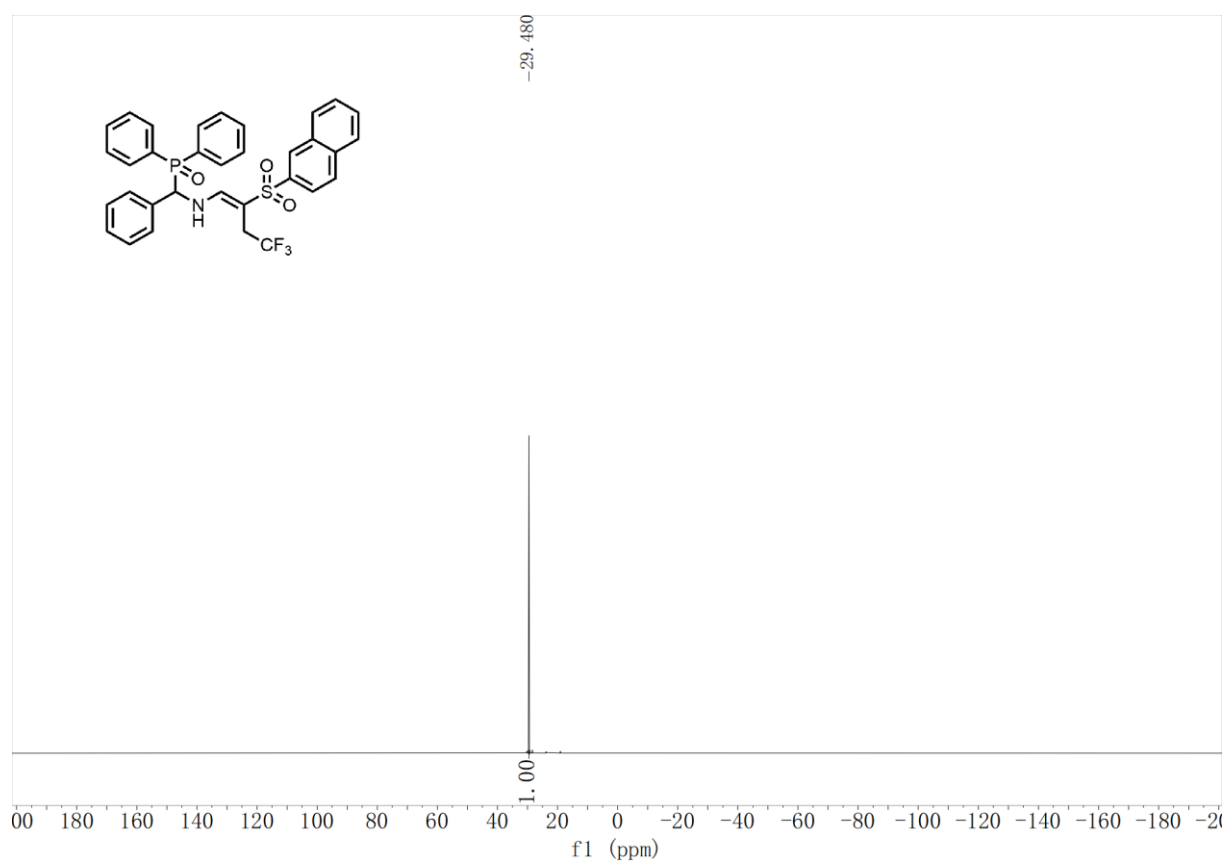

4w – <sup>1</sup>H NMR (500 MHz, DMSO)

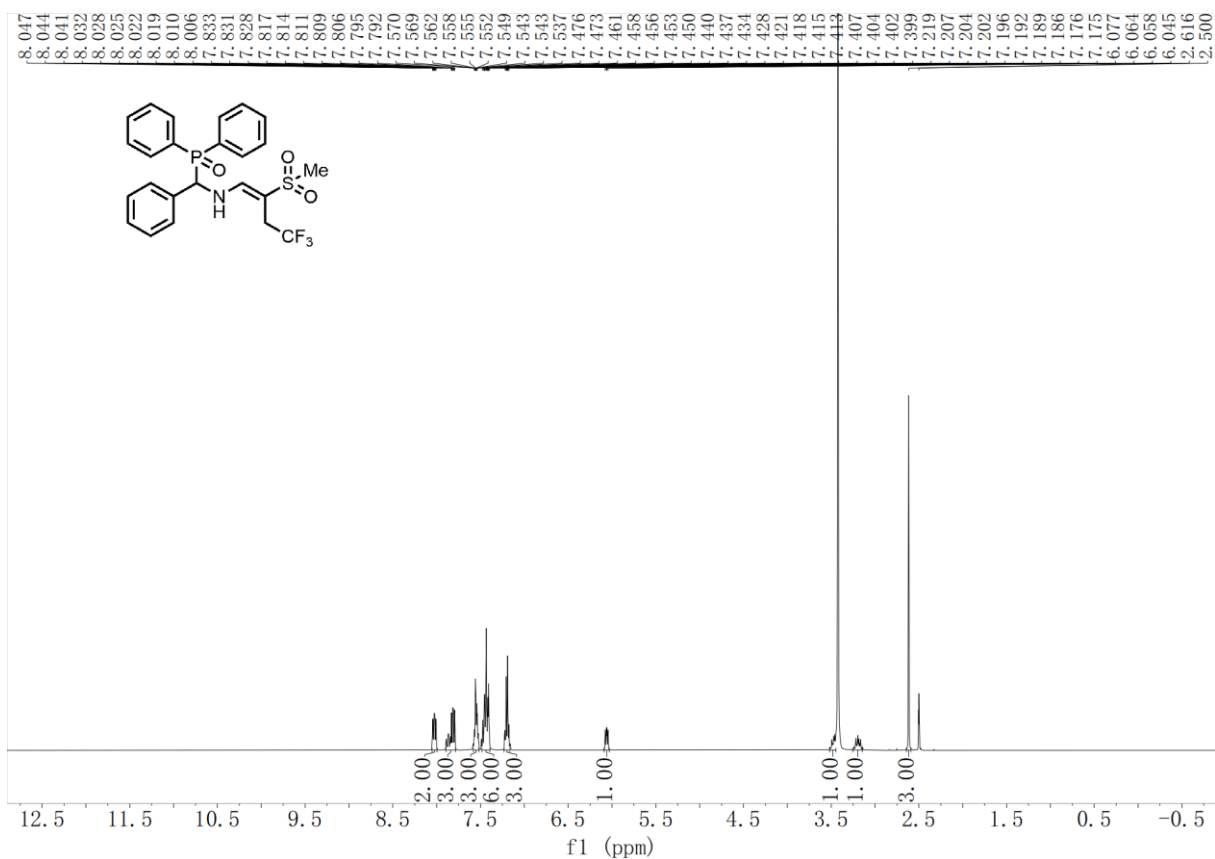

4w – <sup>13</sup>C NMR (126 MHz, DMSO)

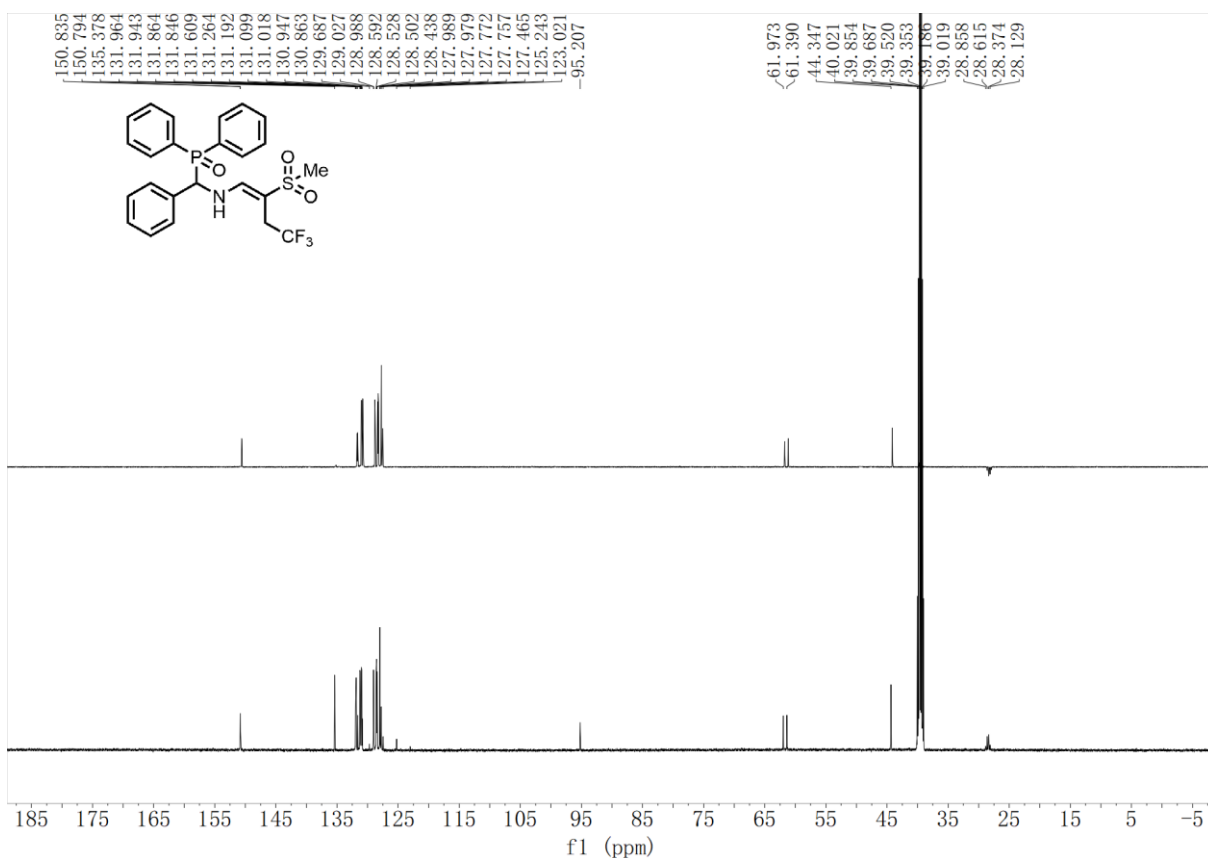

**4w** –  $^{19}\text{F}$  NMR (471 MHz, DMSO)

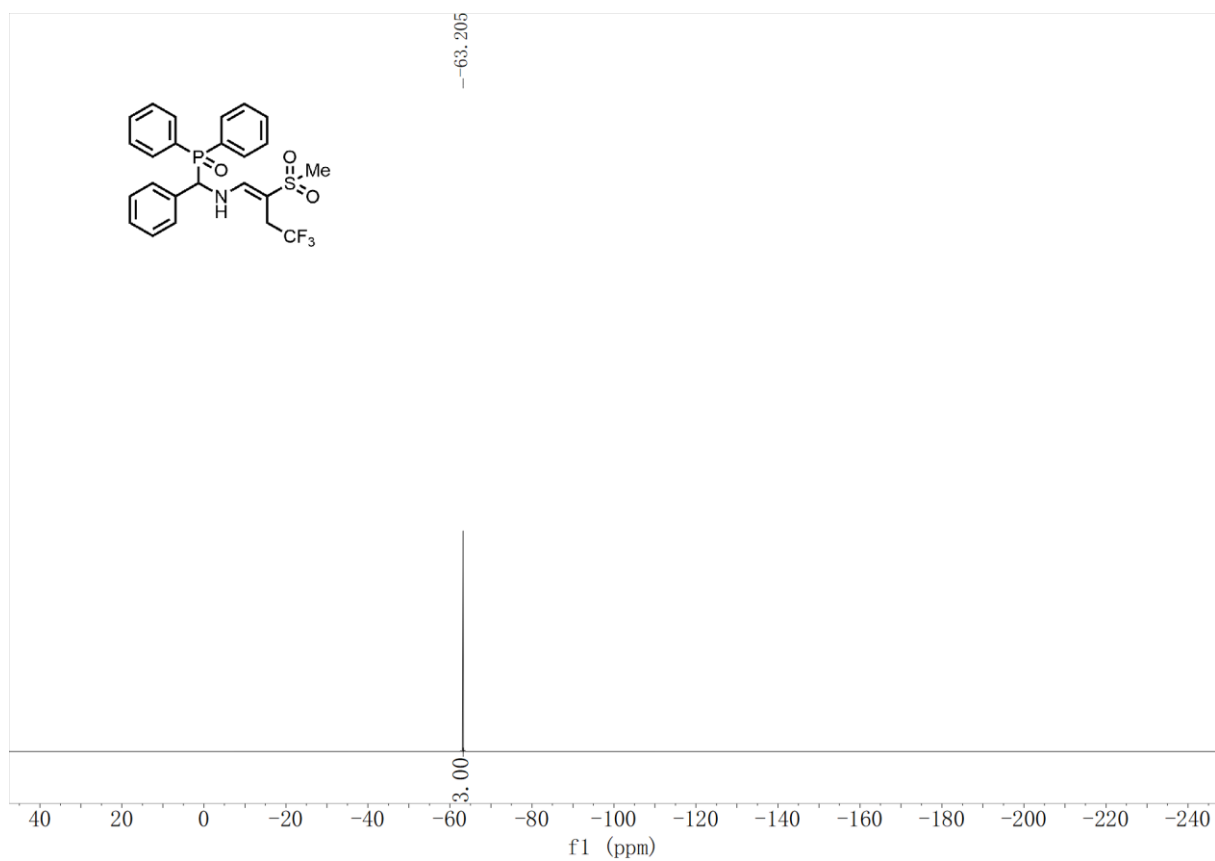

**4w** –  $^{31}\text{P}$  NMR (202 MHz, DMSO)

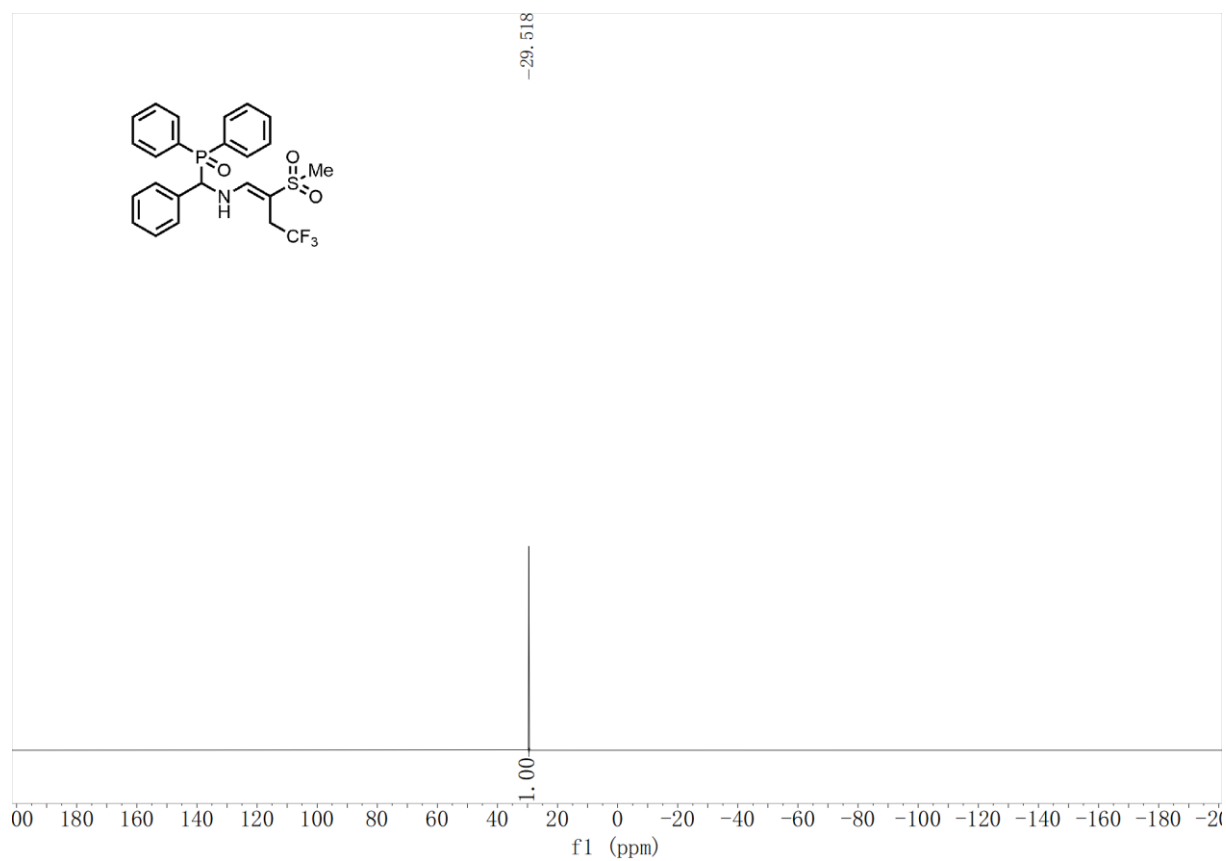

**4x** – <sup>1</sup>H NMR (500 MHz, DMSO)

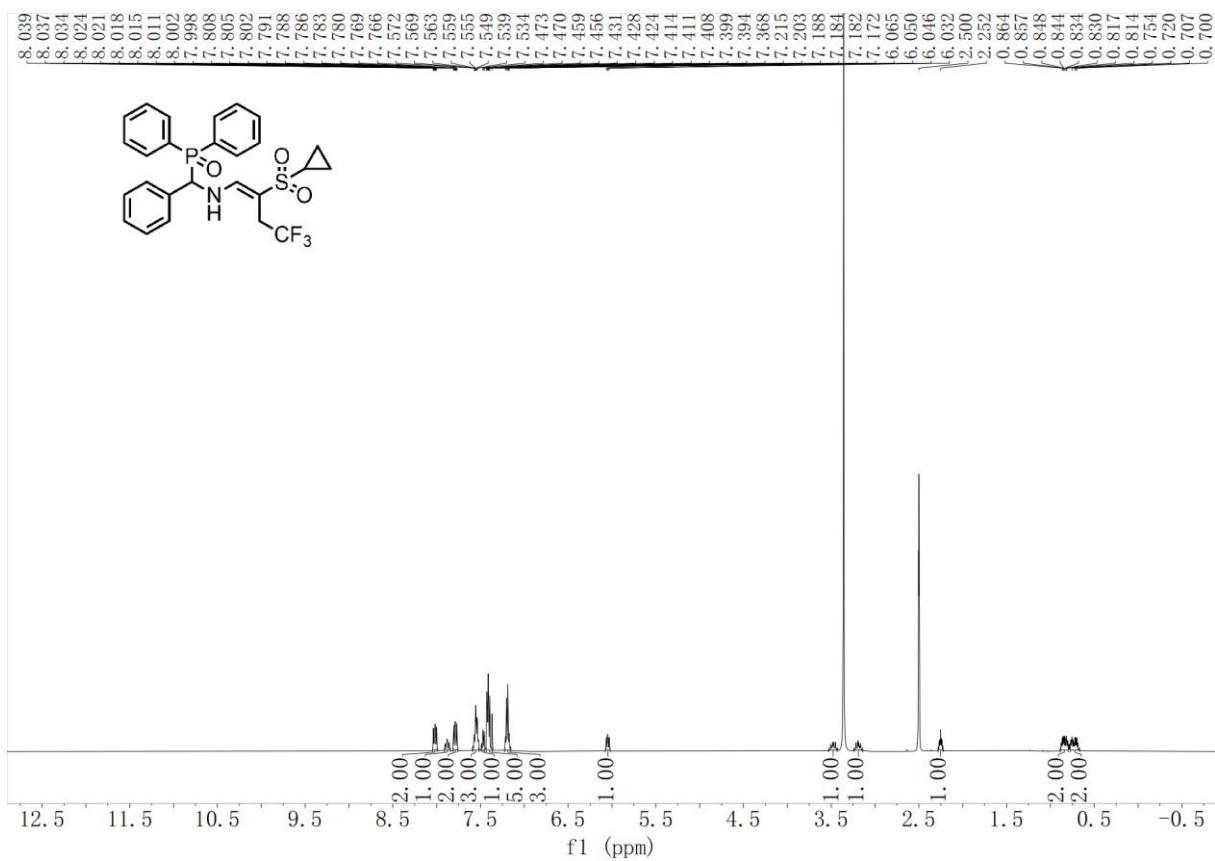

**4x** – <sup>13</sup>C NMR (126 MHz, DMSO)

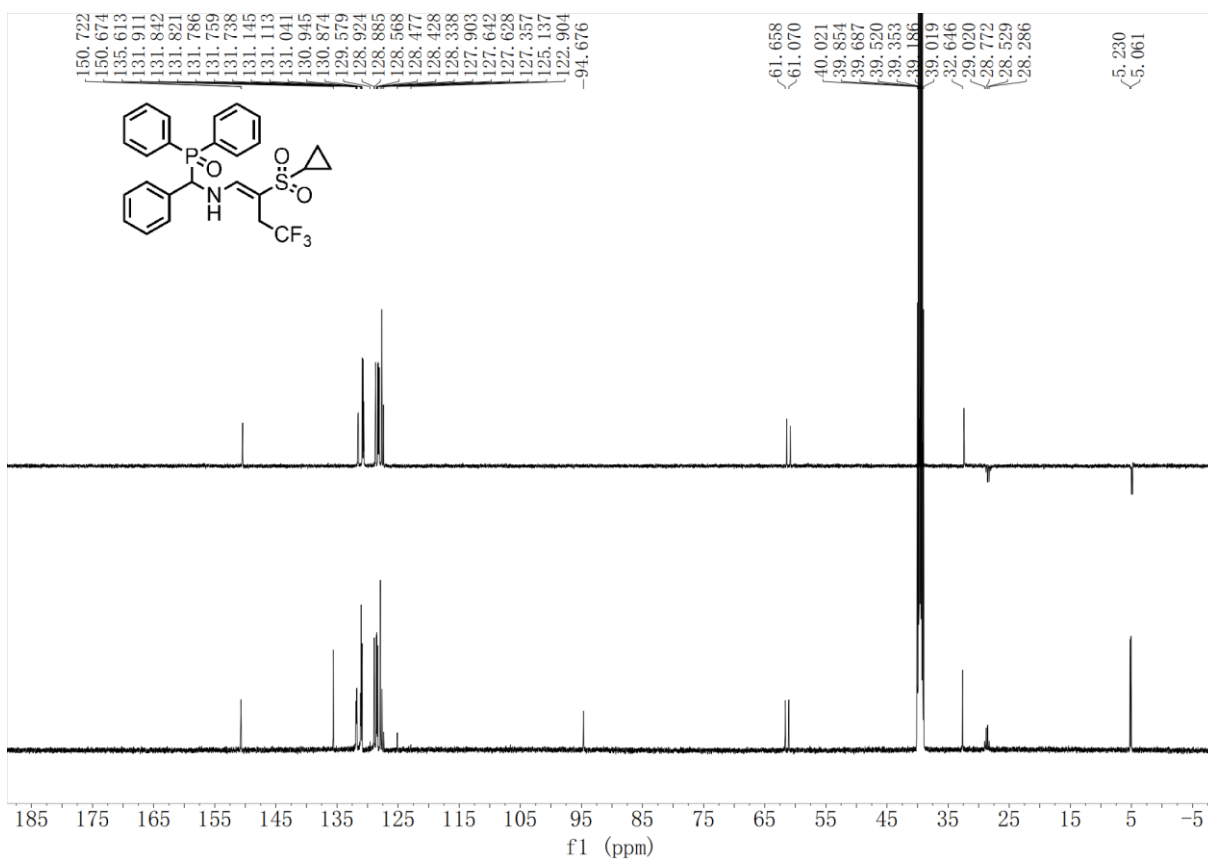



**4x** –  $^{19}\text{F}$  NMR (471 MHz, DMSO)

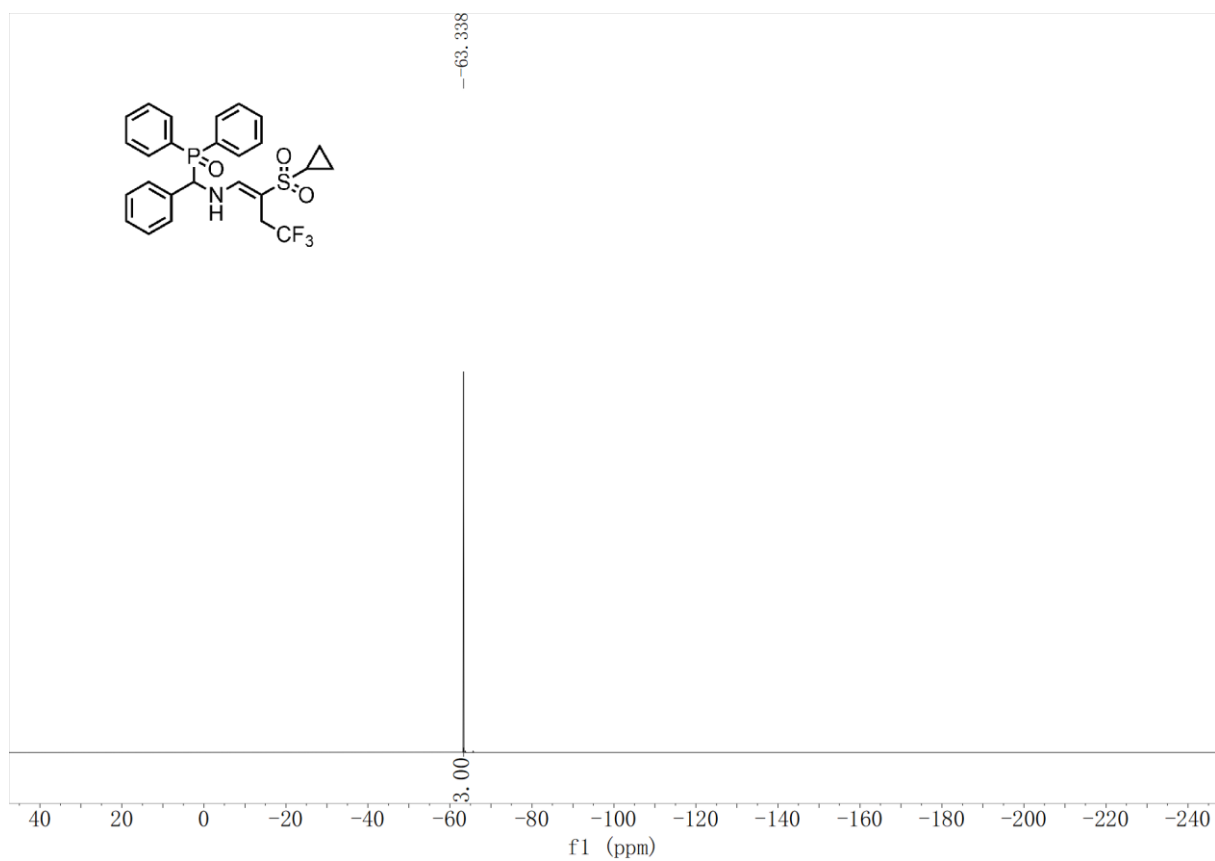

**4x** –  $^{31}\text{P}$  NMR (202 MHz, DMSO)

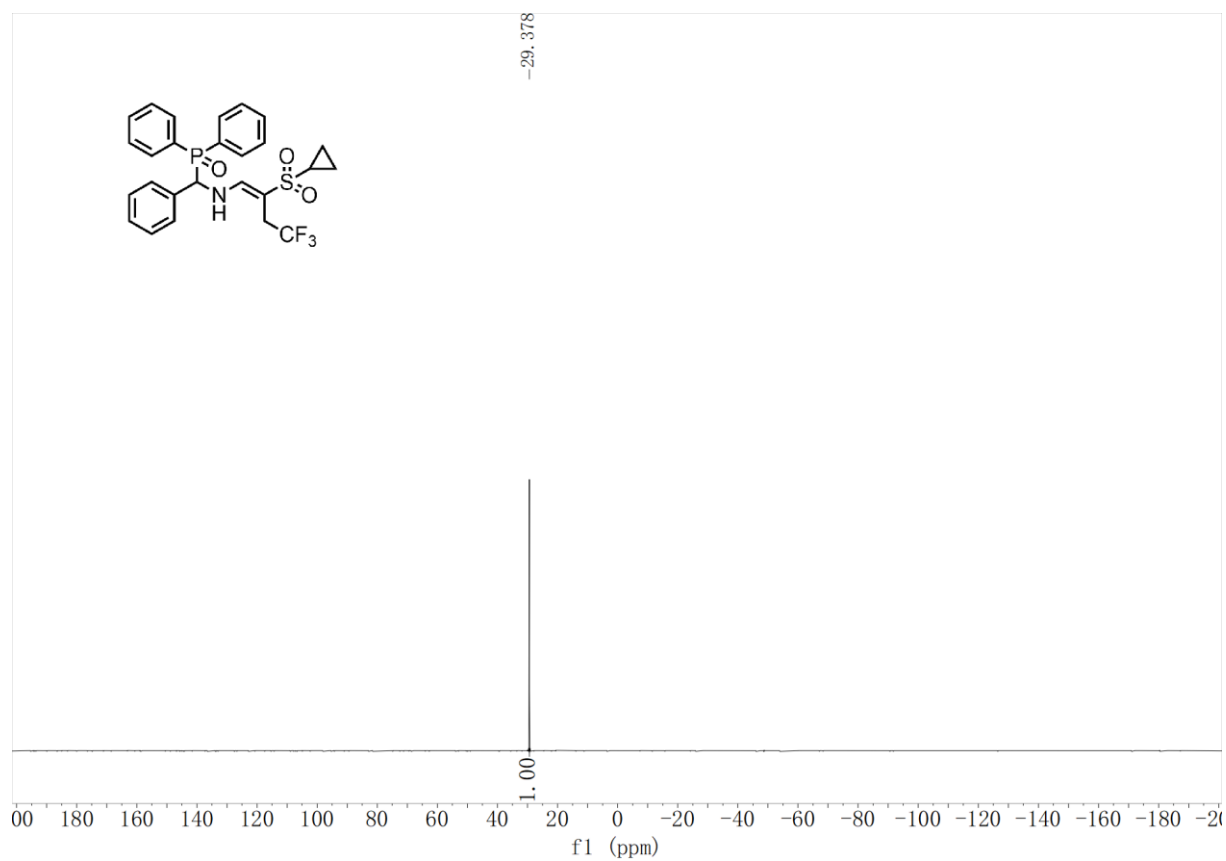

**4y** – <sup>1</sup>H NMR (500 MHz, DMSO)

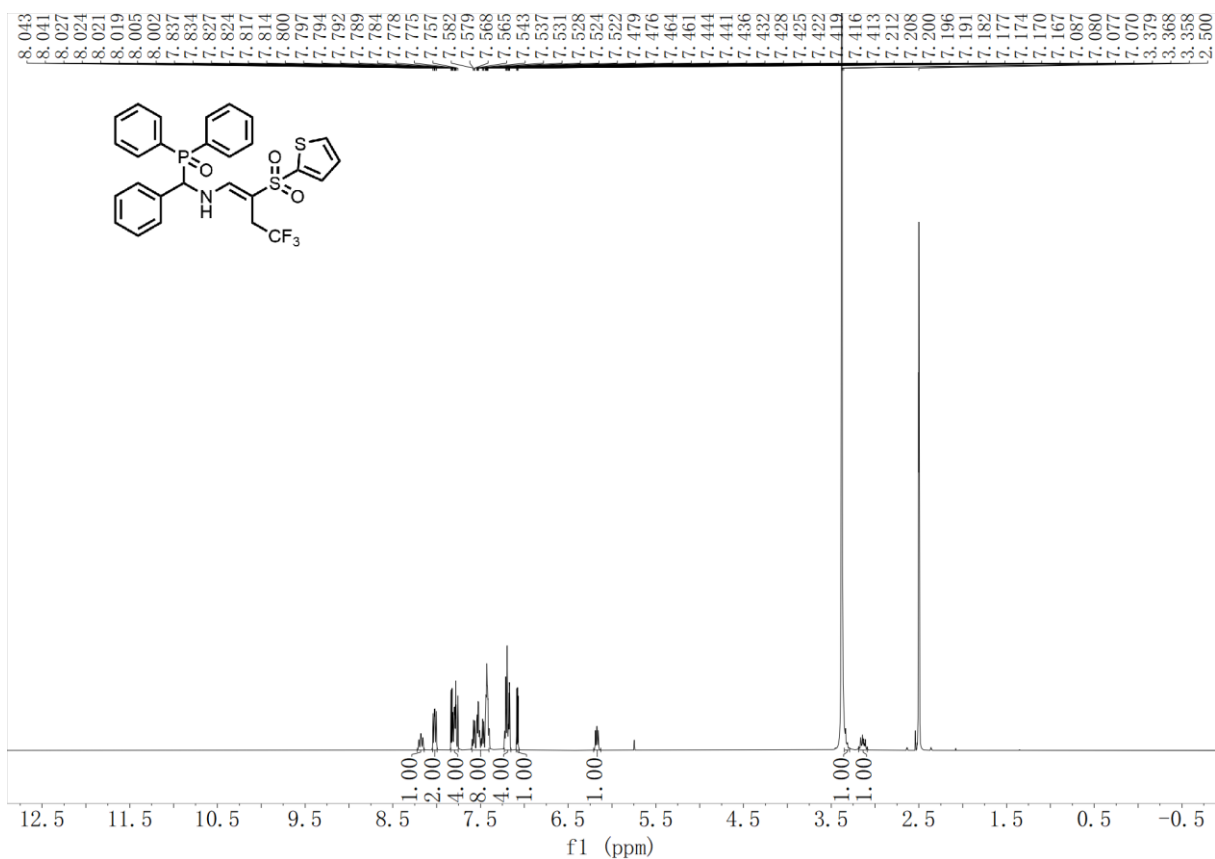

**4y** – <sup>13</sup>C NMR (126 MHz, DMSO)

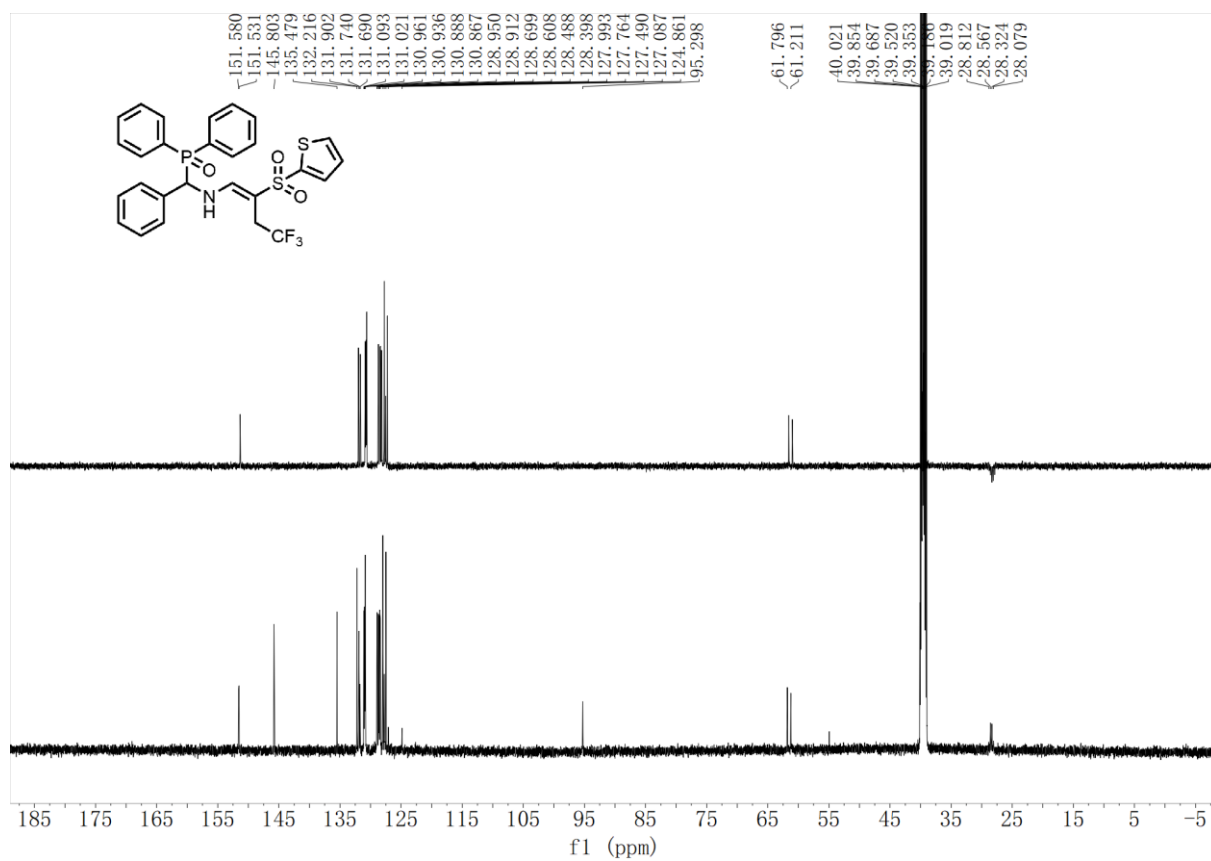

**4y** –  $^{19}\text{F}$  NMR (471 MHz, DMSO)

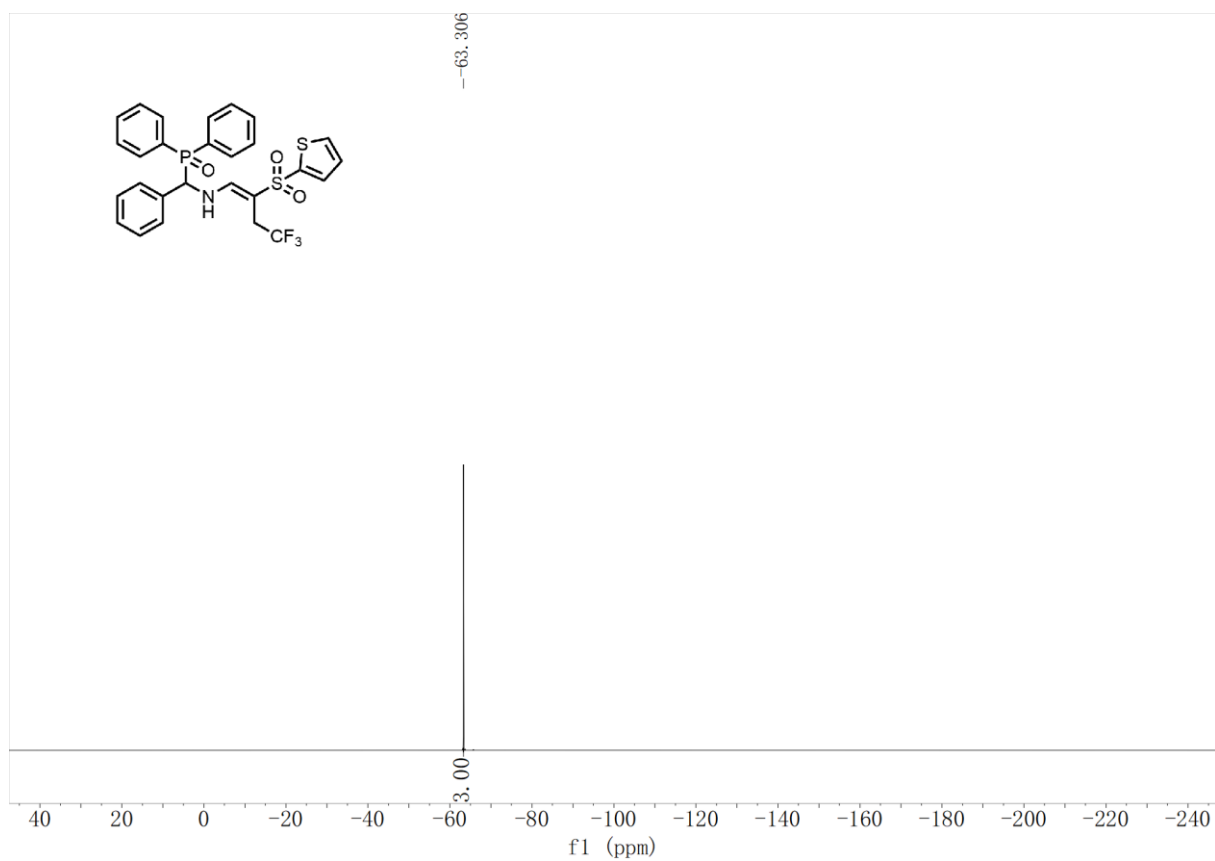

**4y** –  $^{31}\text{P}$  NMR (202 MHz, DMSO)

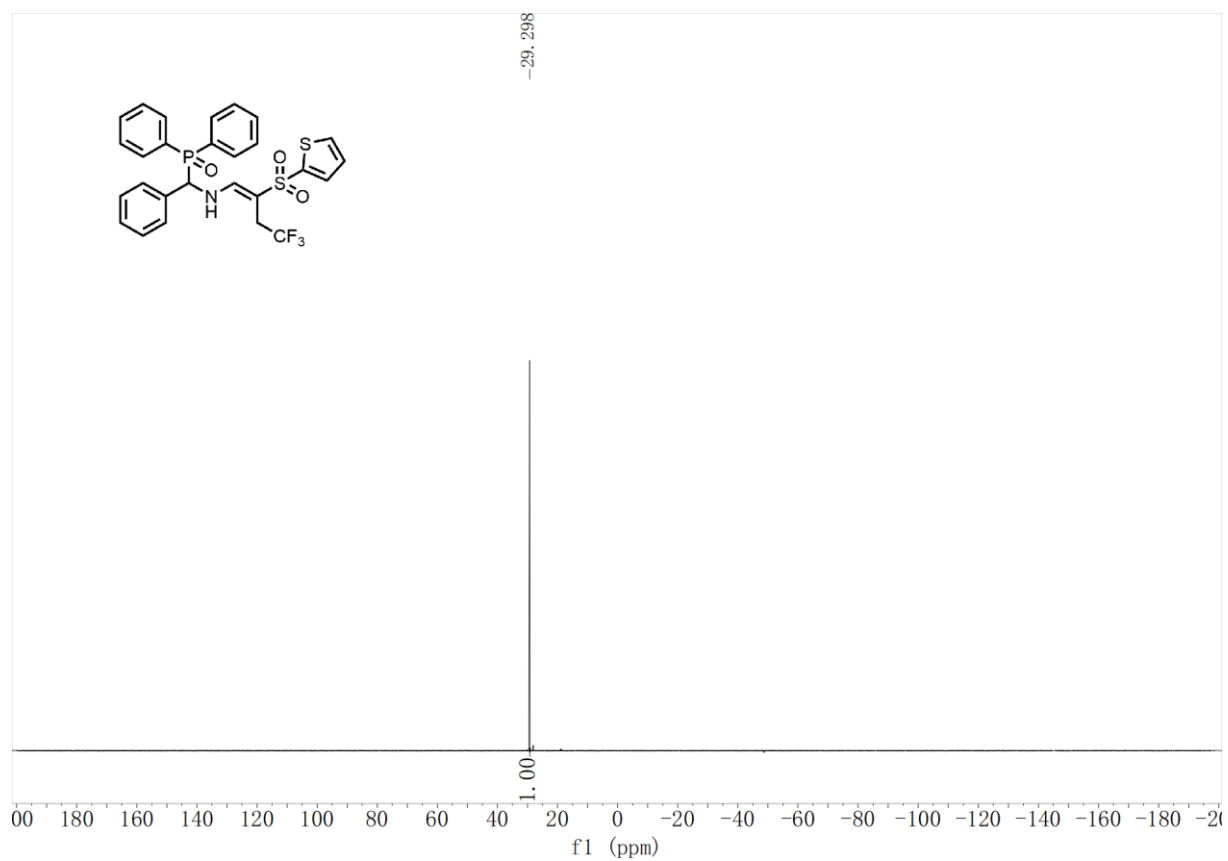

**4z** – <sup>1</sup>H NMR (300 MHz, DMSO)

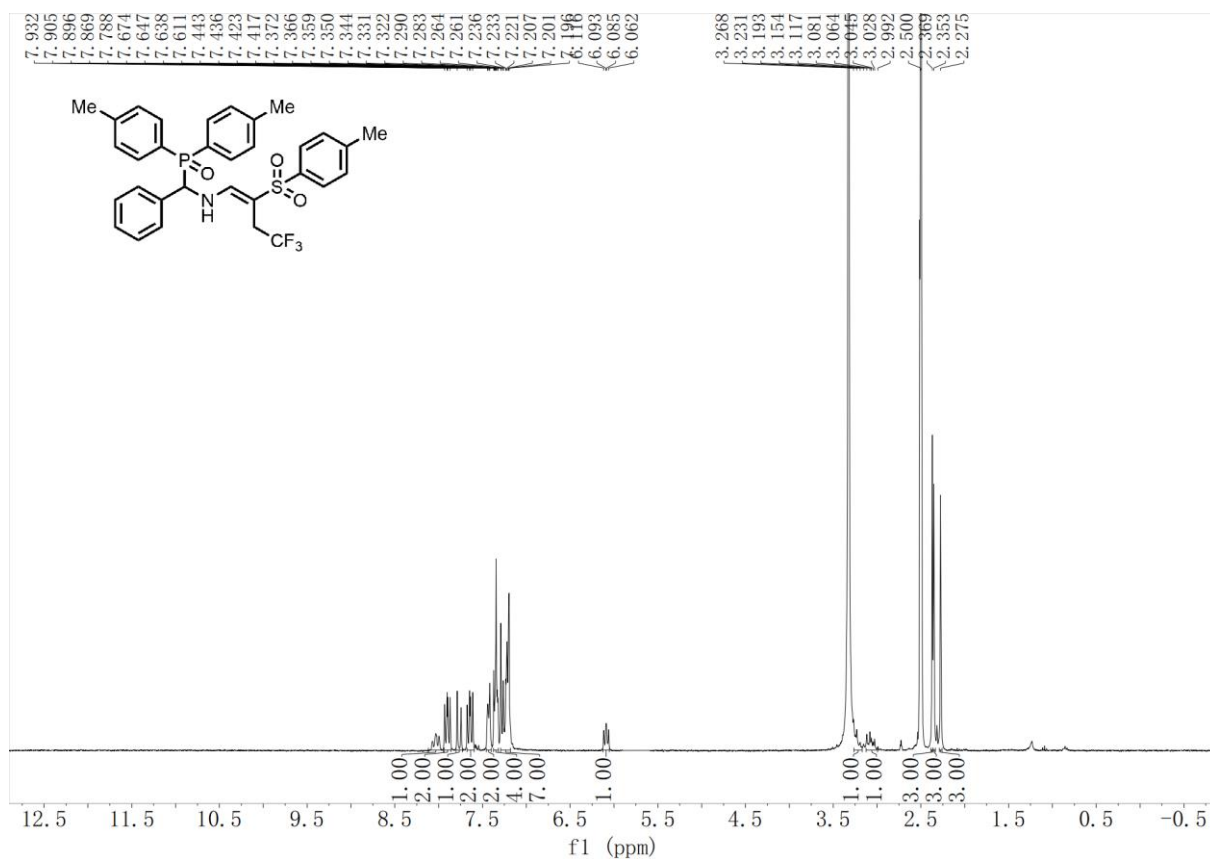

**4z** – <sup>13</sup>C NMR (126 MHz, DMSO)

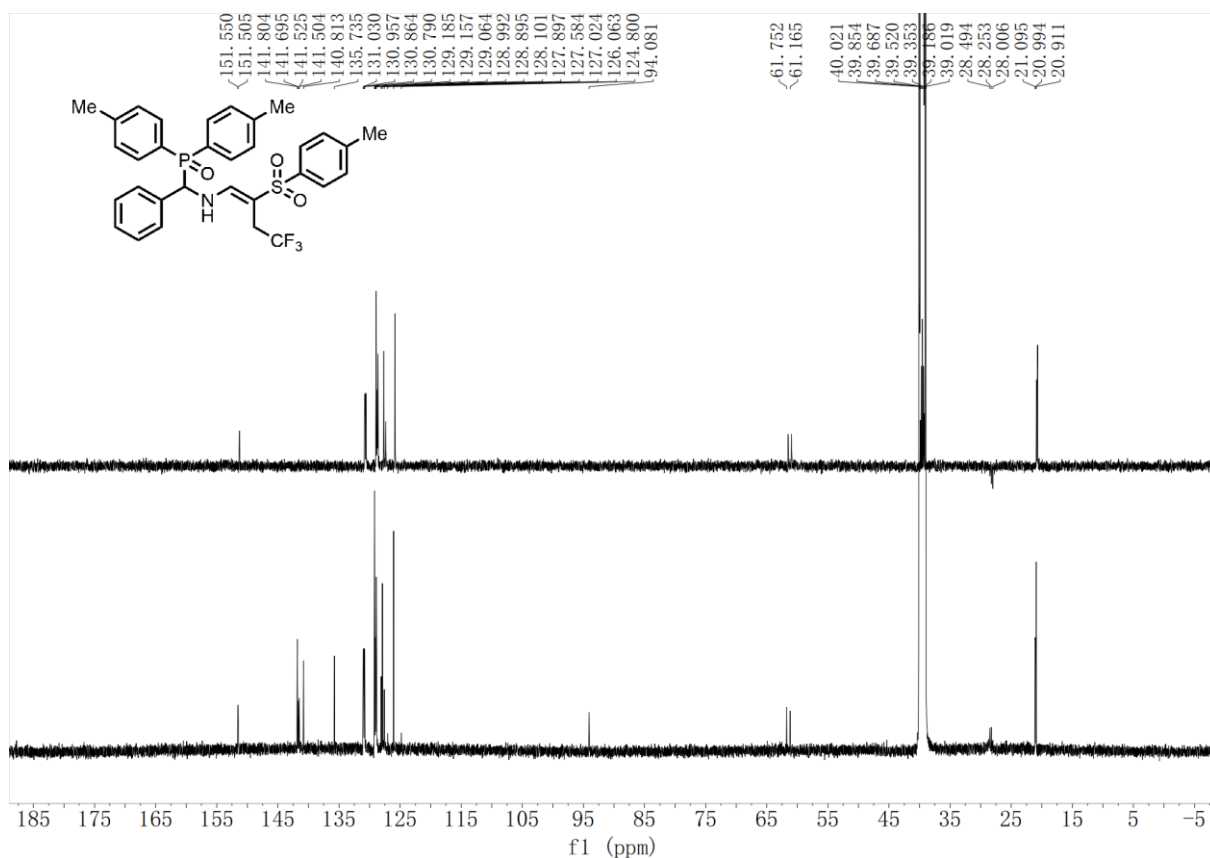

**4z** –  $^{19}\text{F}$  NMR (471 MHz, DMSO)

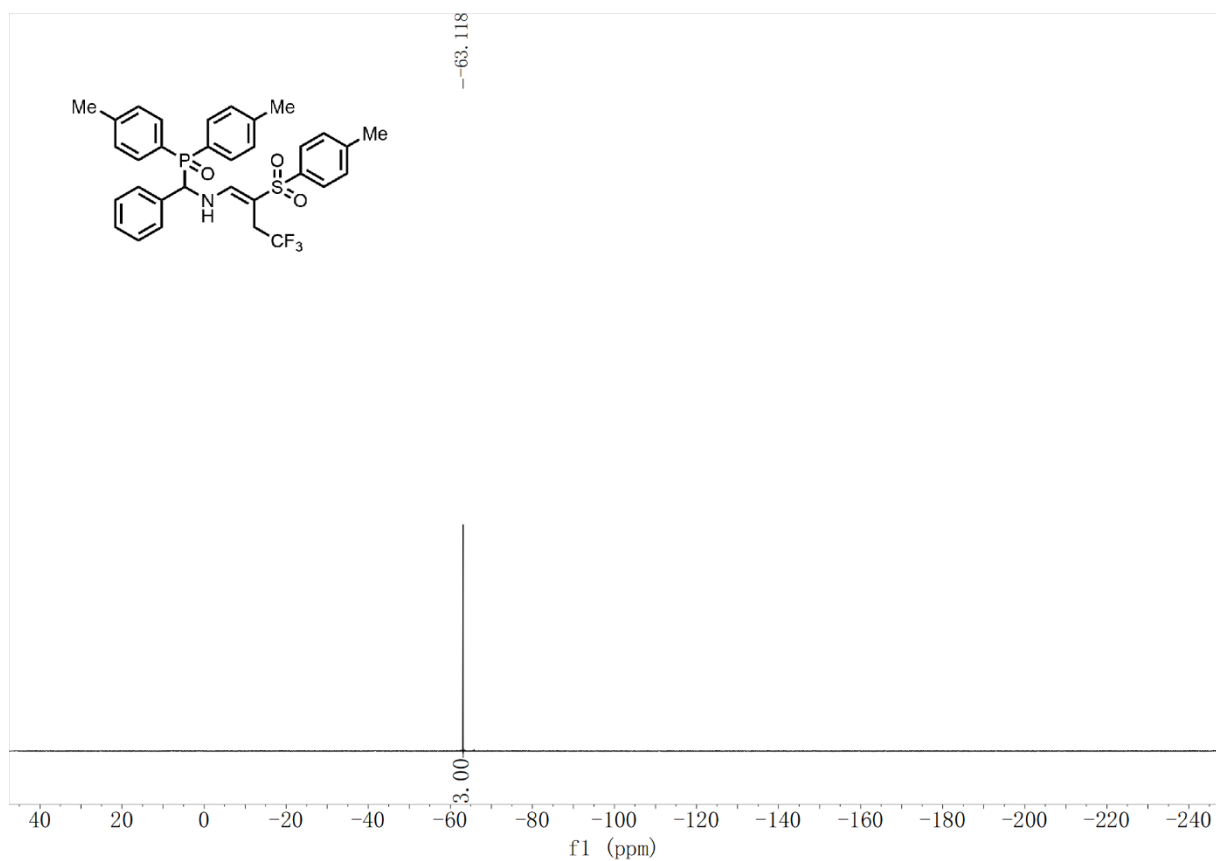

**4z** –  $^{31}\text{P}$  NMR (202 MHz, DMSO)

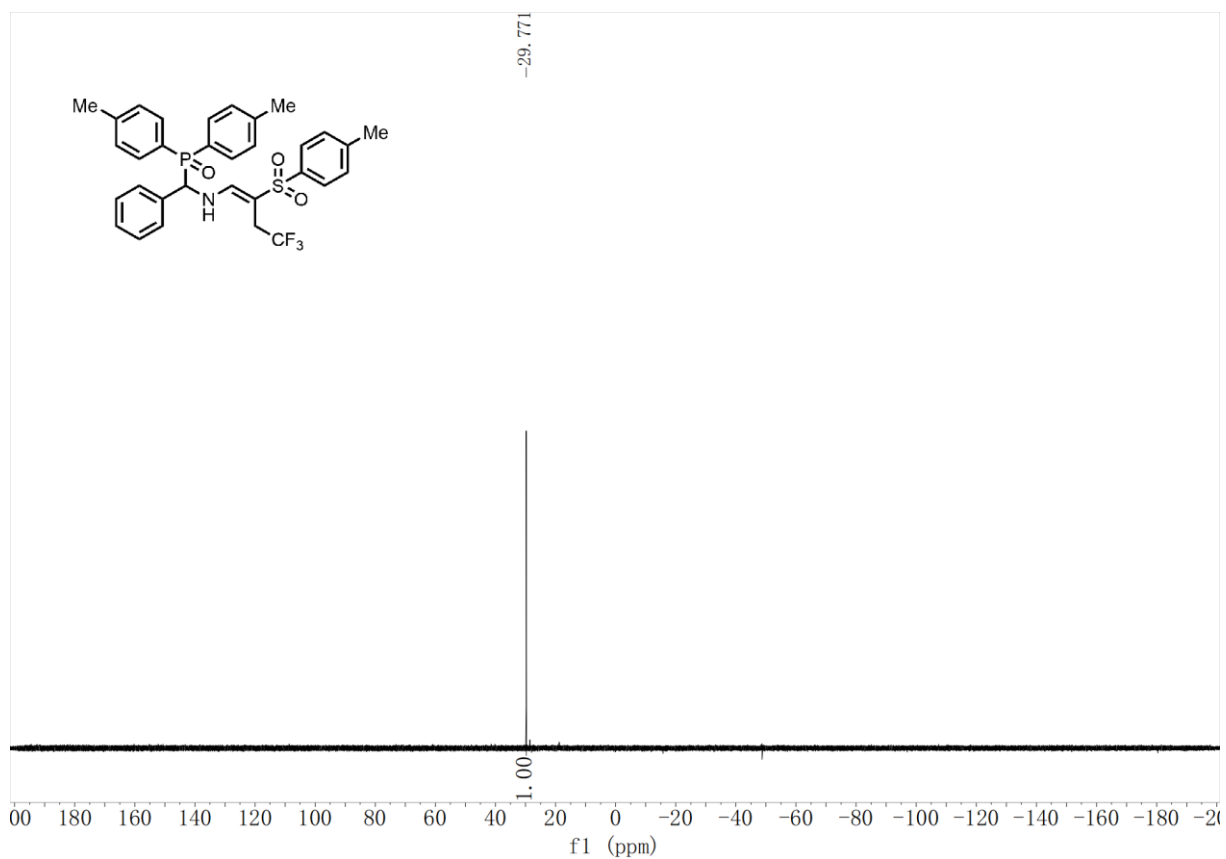

**4aa** – <sup>1</sup>H NMR (500 MHz, DMSO)

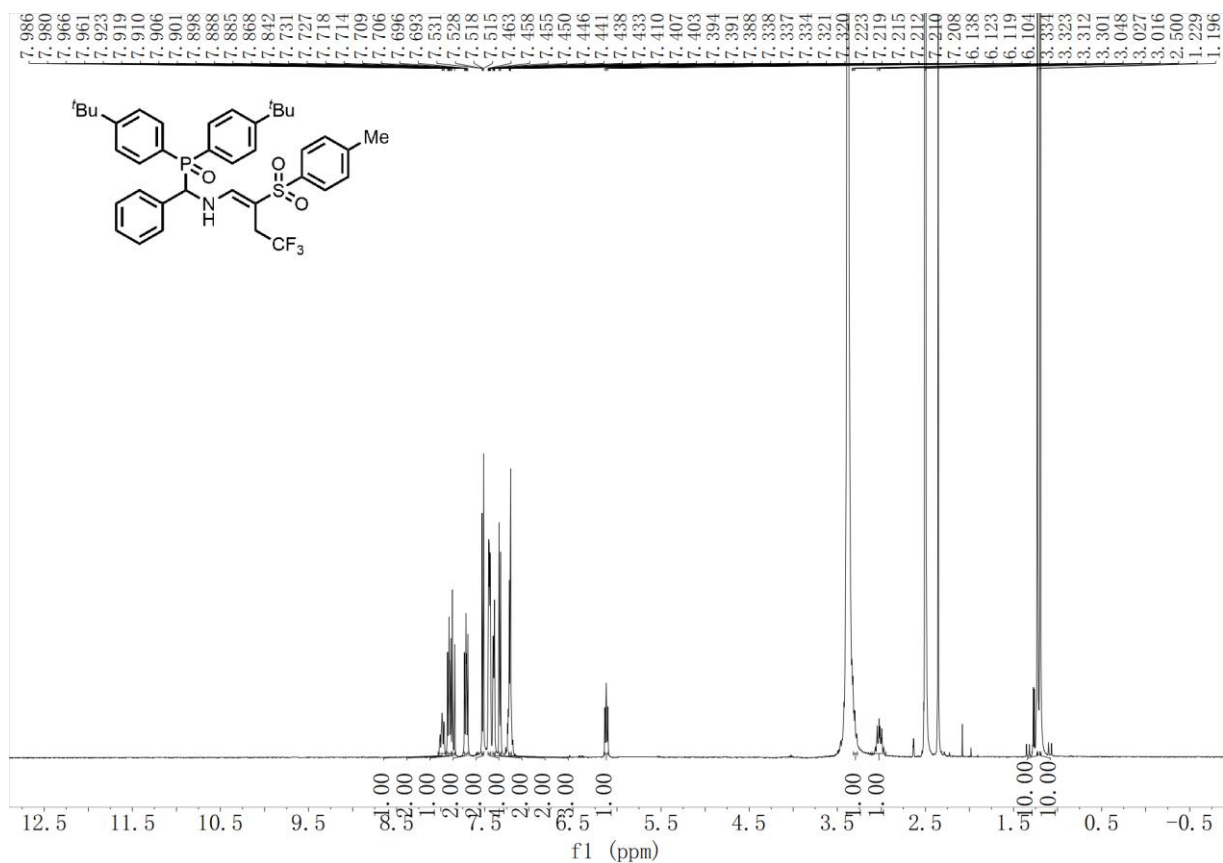

**4aa** – <sup>13</sup>C NMR (126 MHz, DMSO)

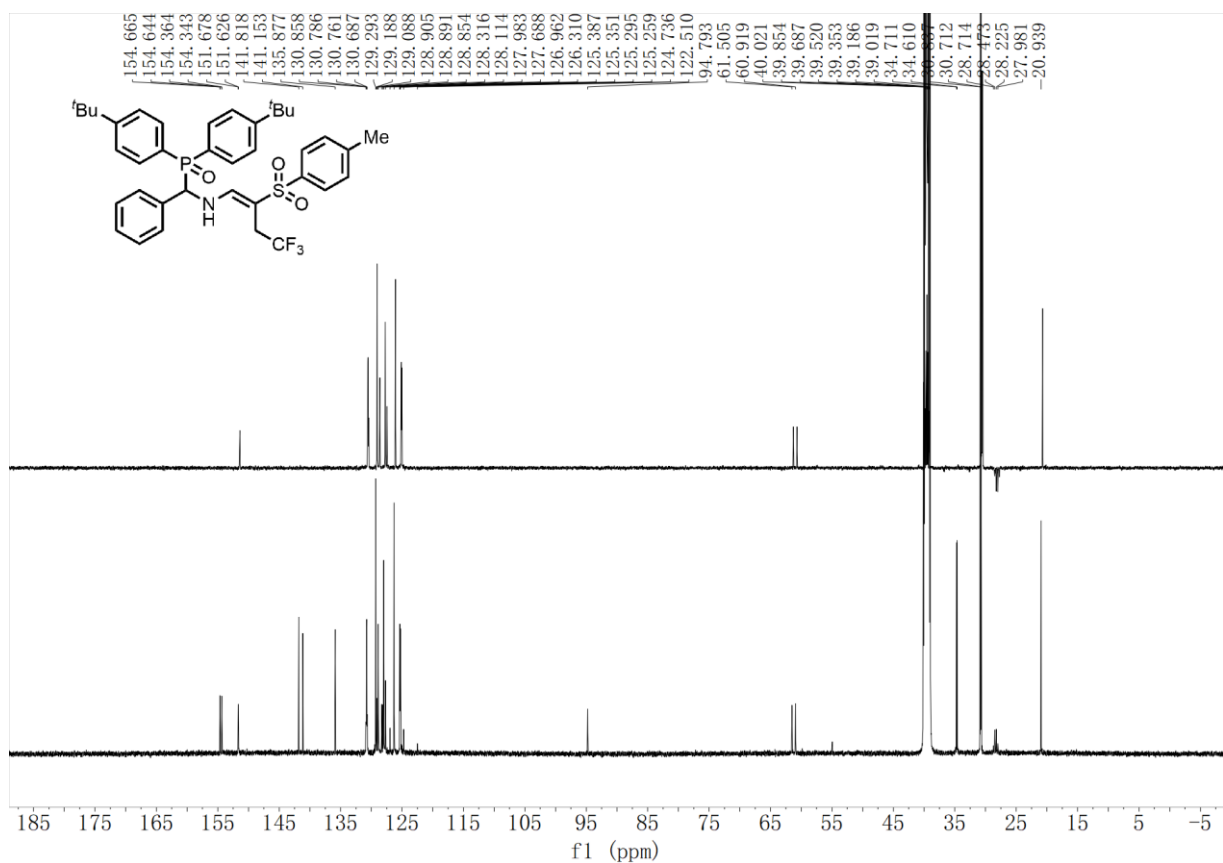

**4aa** –  $^{19}\text{F}$  NMR (471 MHz, DMSO)

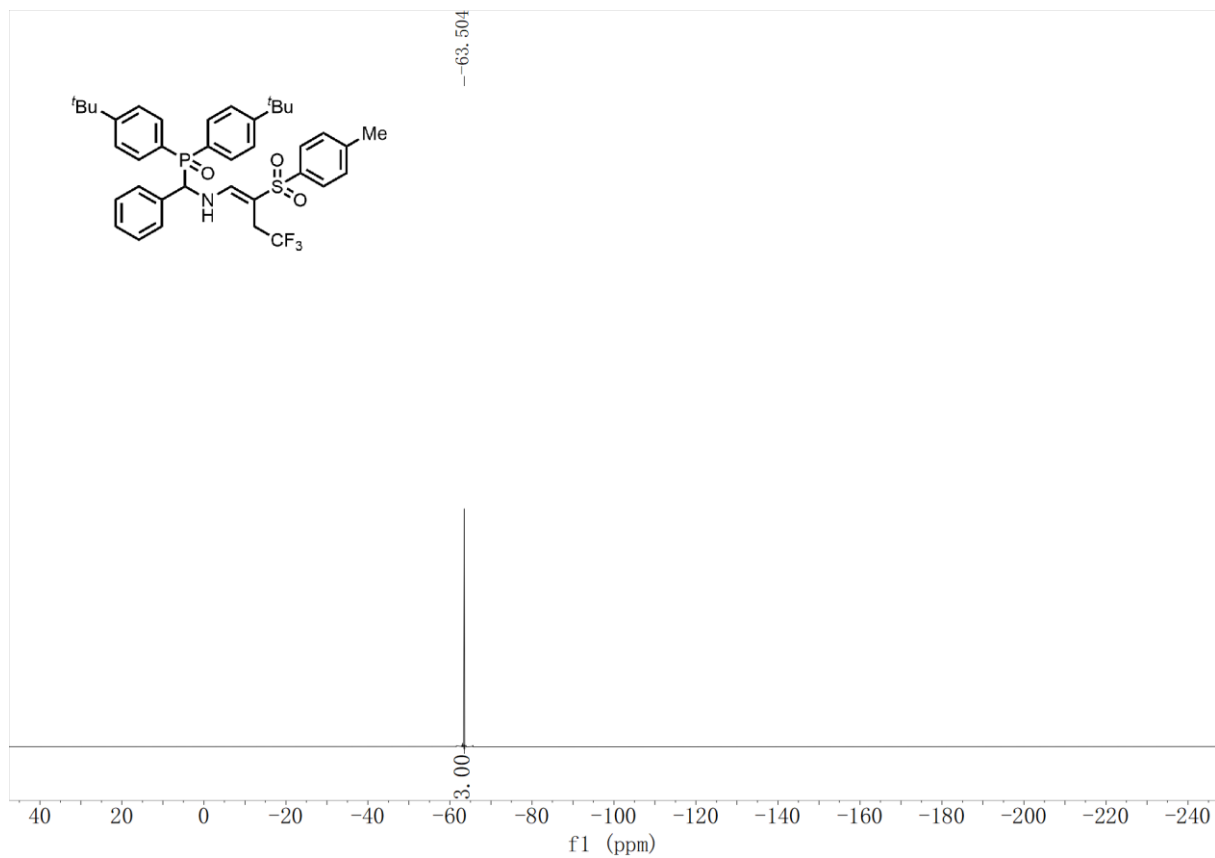

**4aa** –  $^{31}\text{P}$  NMR (202 MHz, DMSO)

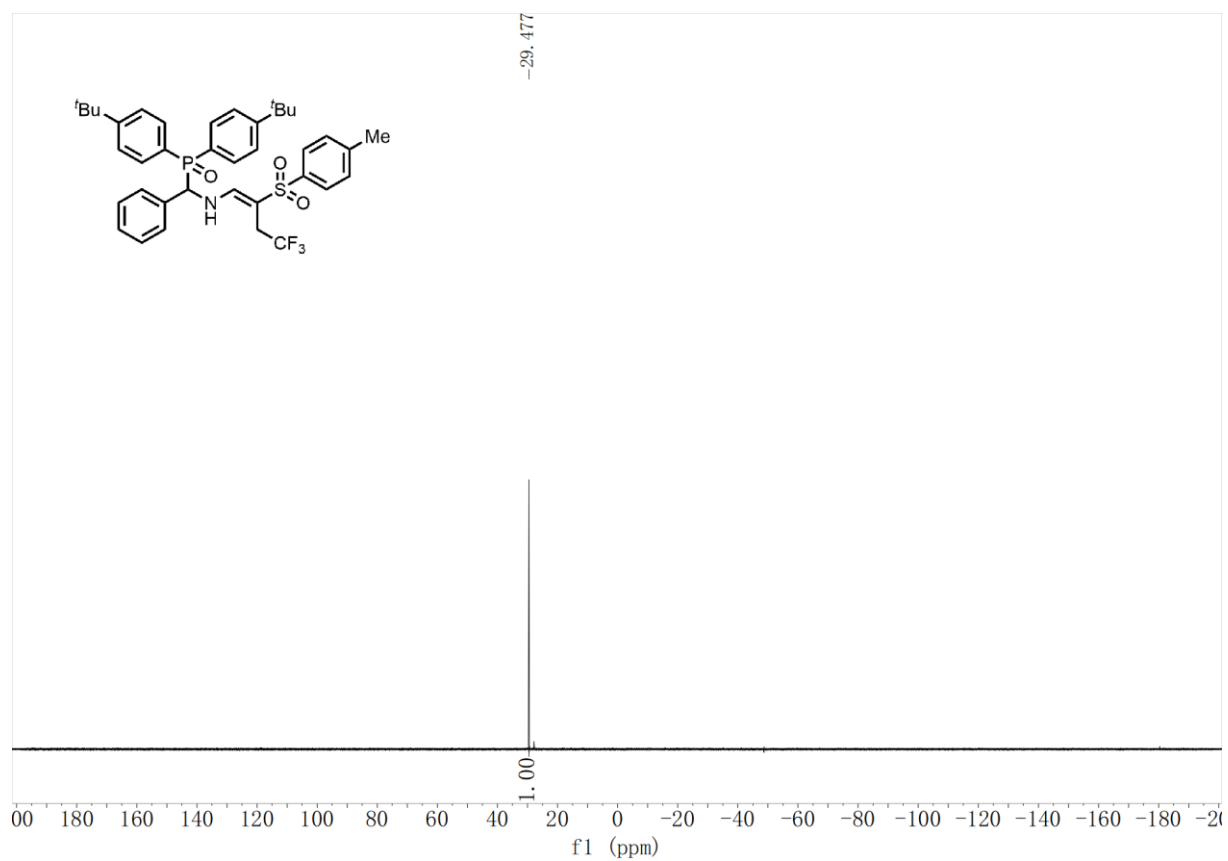

4ab - <sup>1</sup>H NMR (500 MHz, DMSO)

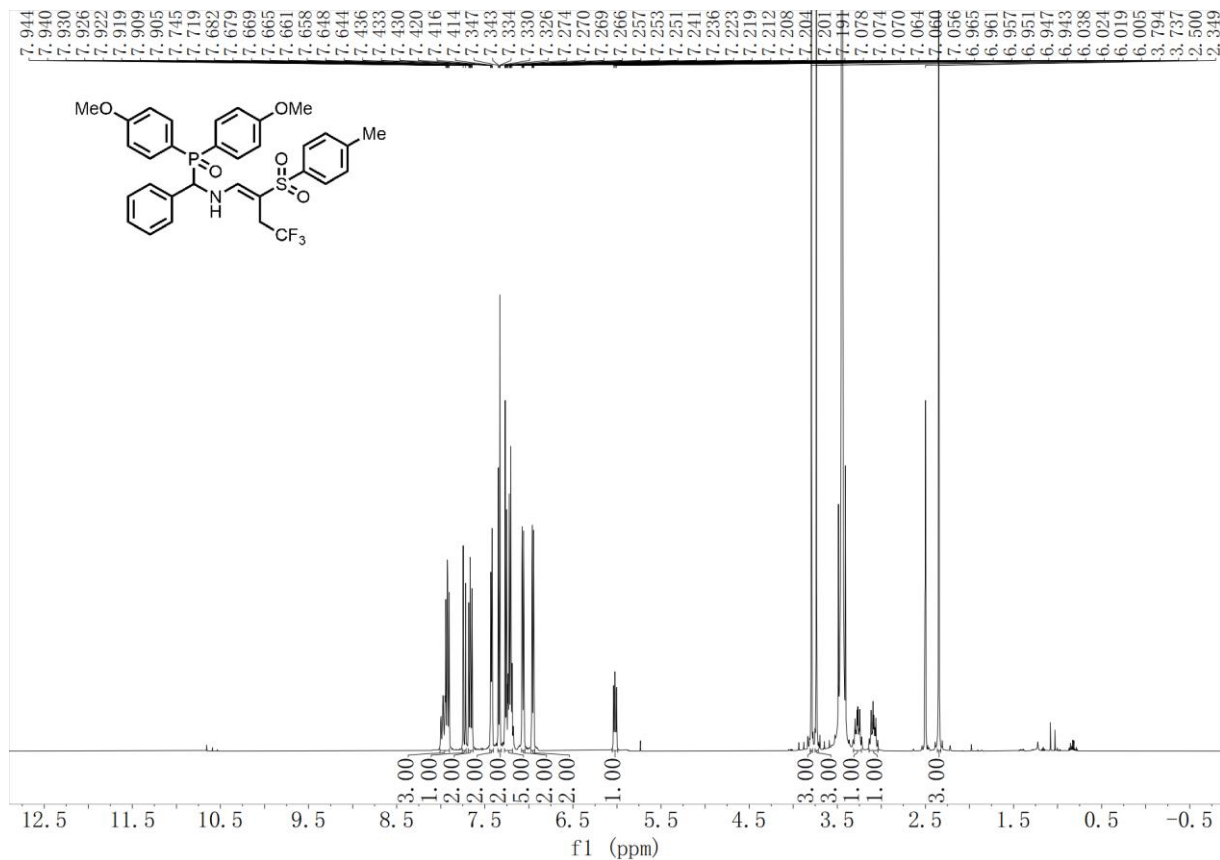

4ab - <sup>13</sup>C NMR (126 MHz, DMSO)

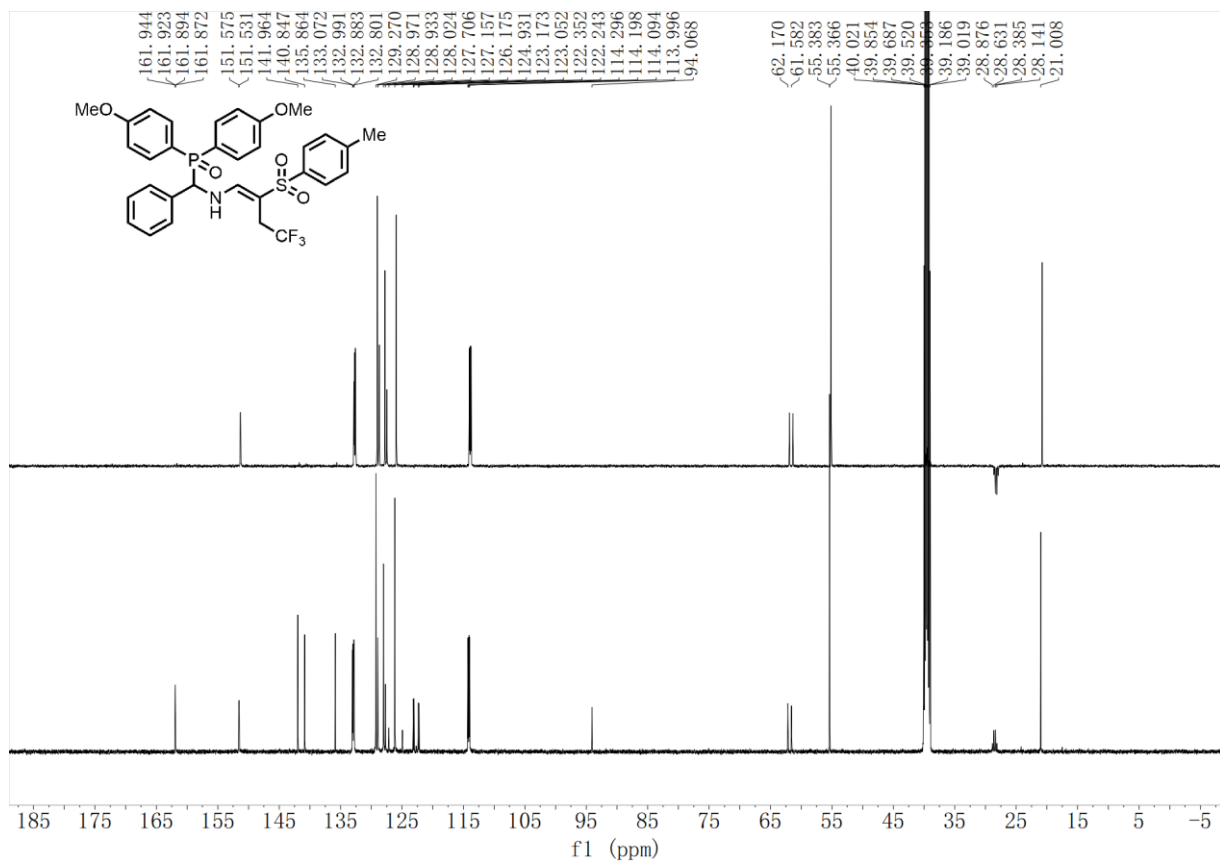



**4ab** –  $^{19}\text{F}$  NMR (282 MHz, DMSO)

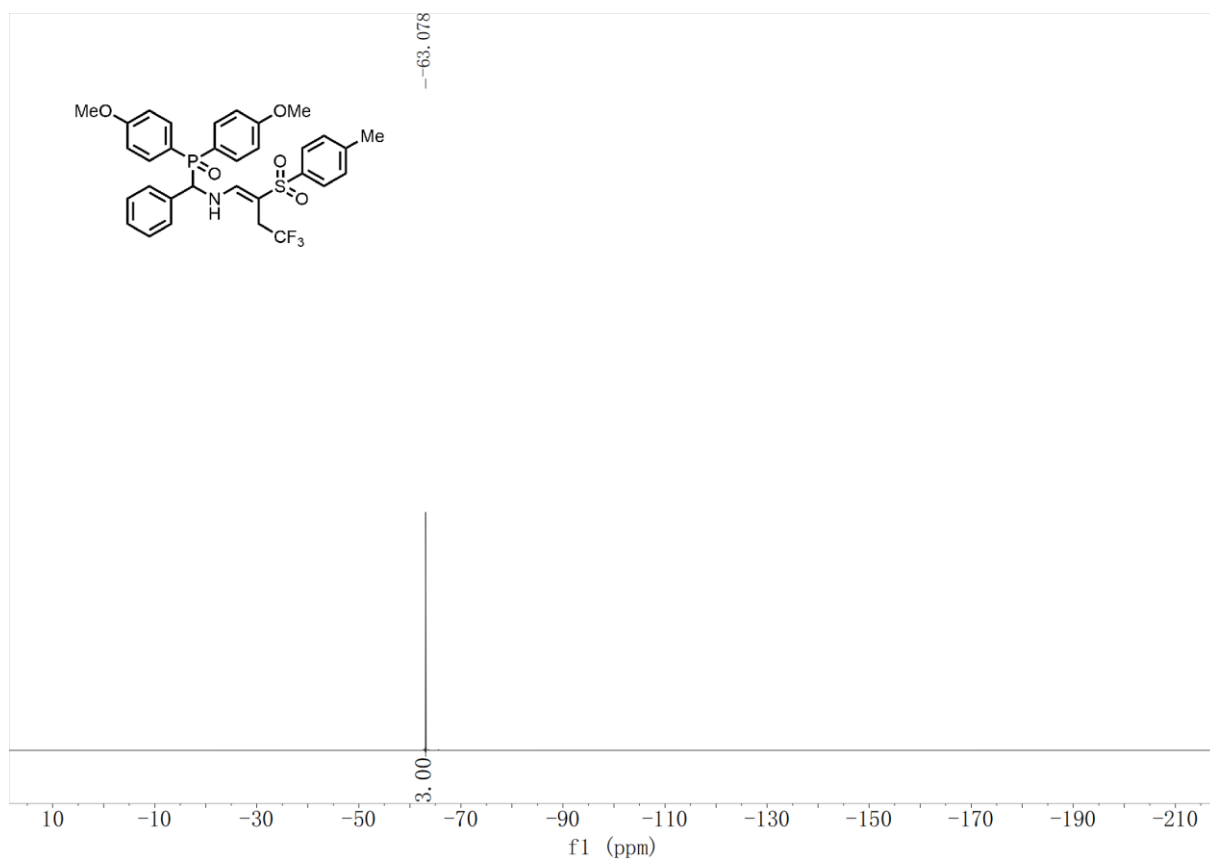

**4ab** –  $^{31}\text{P}$  NMR (121 MHz, DMSO)

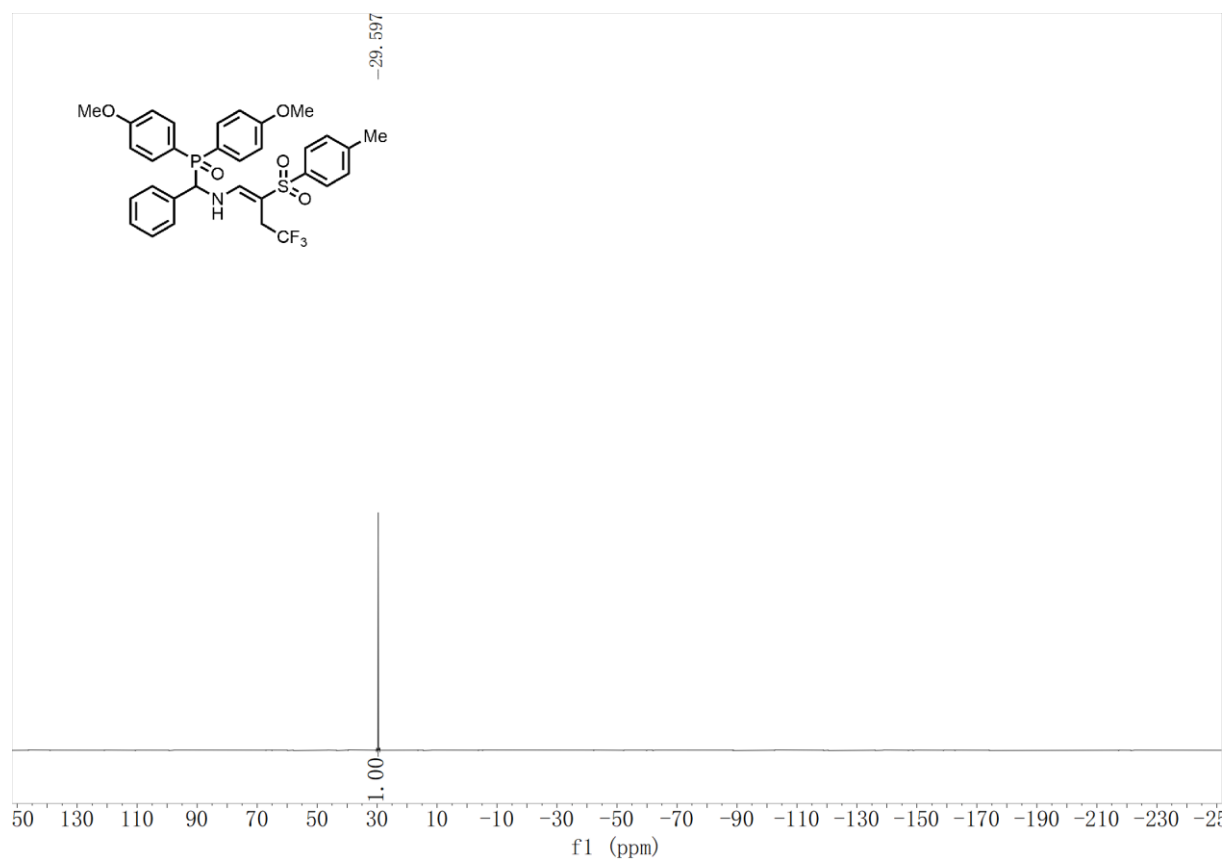

**4ac** – <sup>1</sup>H NMR (500 MHz, DMSO)

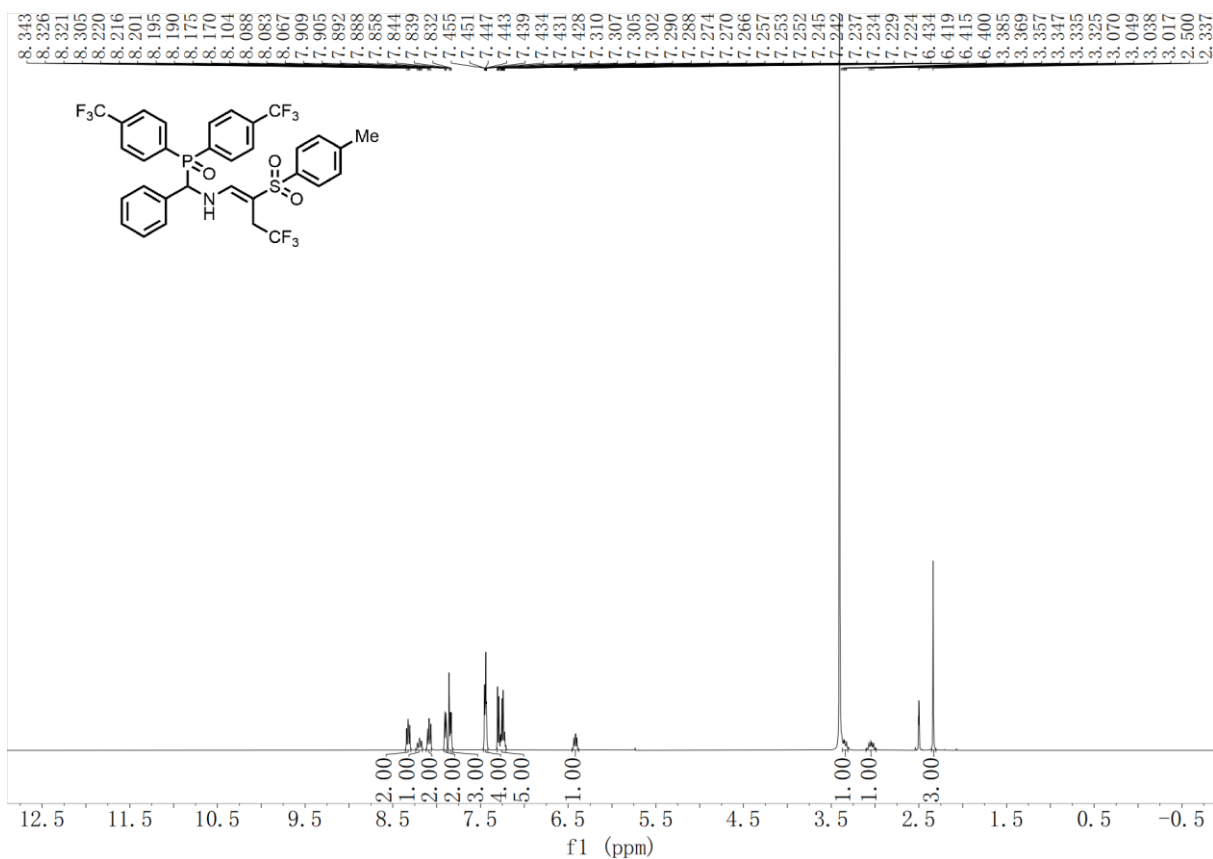

**4ac** – <sup>13</sup>C NMR (126 MHz, DMSO)

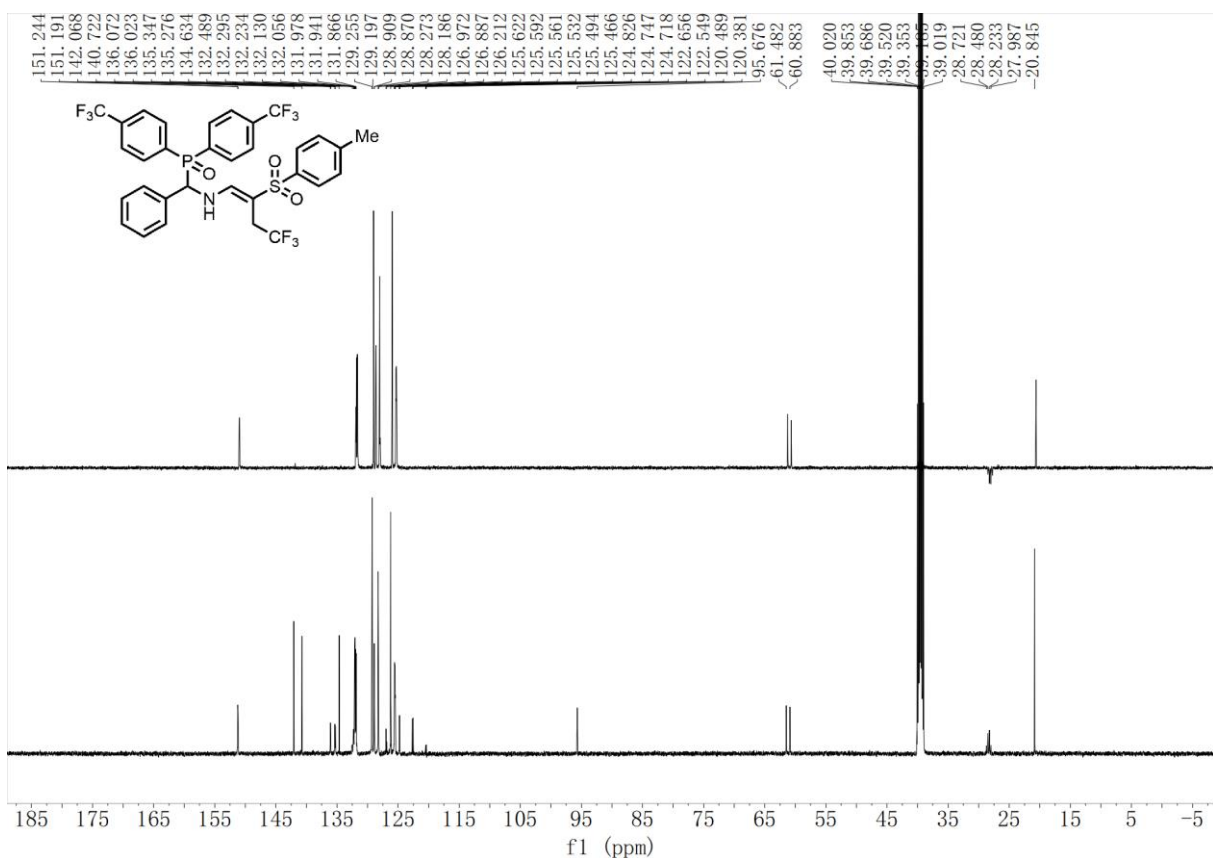

**4ac** –  $^{19}\text{F}$  NMR (471 MHz, DMSO)

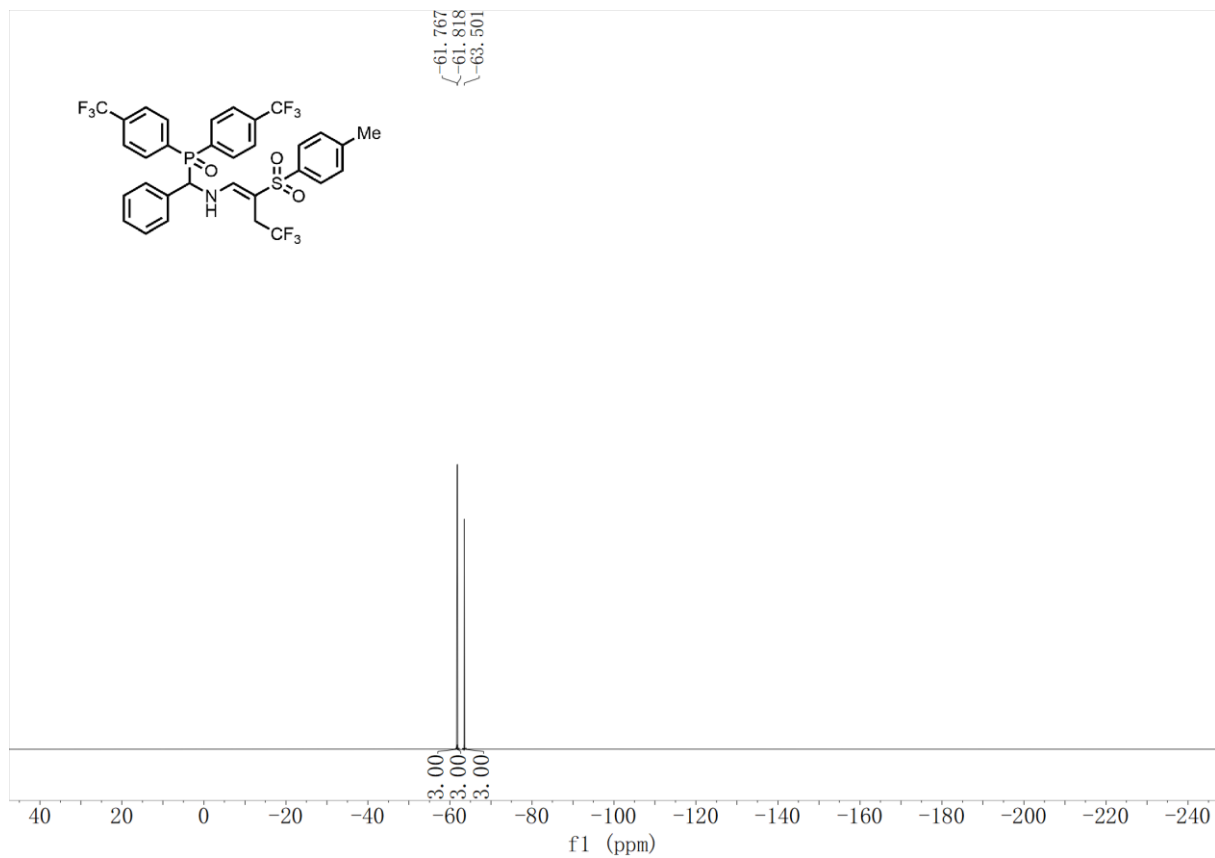

**4ac** –  $^{31}\text{P}$  NMR (202 MHz, DMSO)

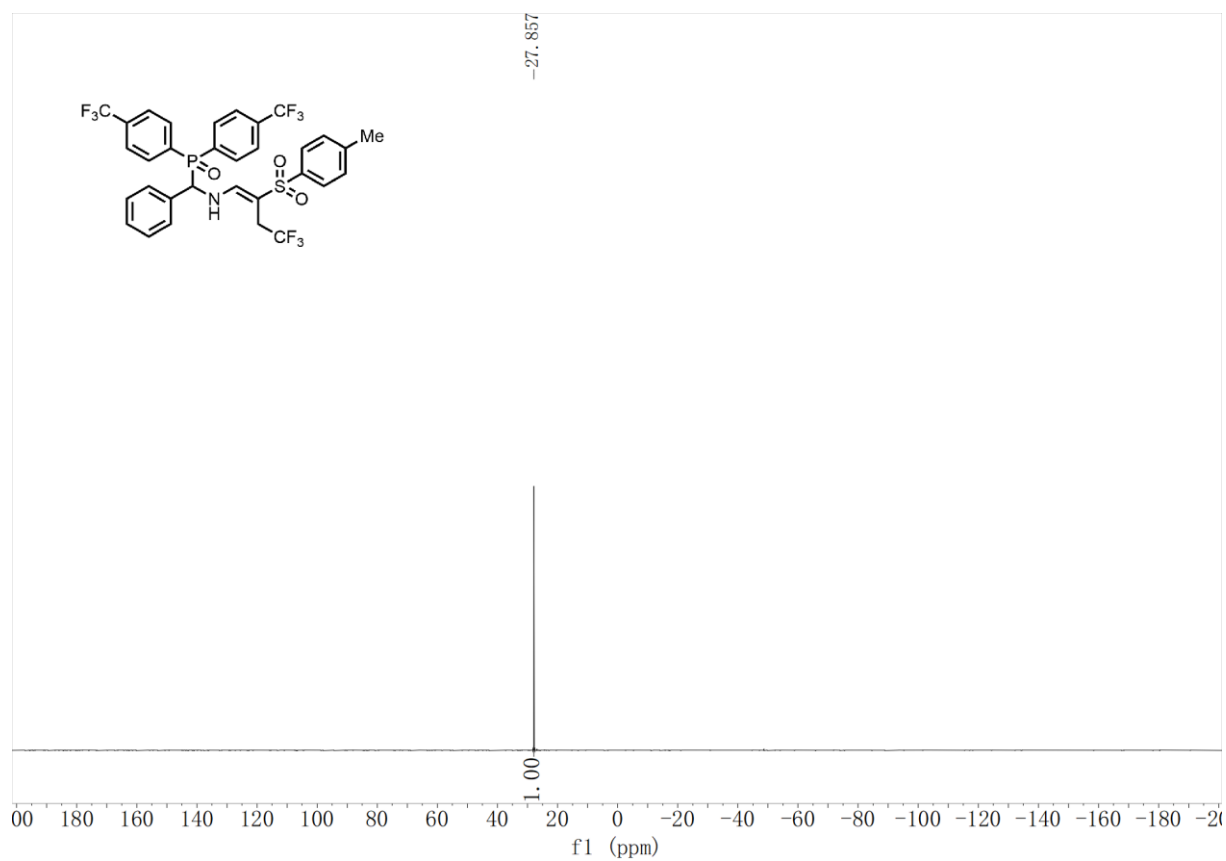

**4ad** – <sup>1</sup>H NMR (500 MHz, DMSO)

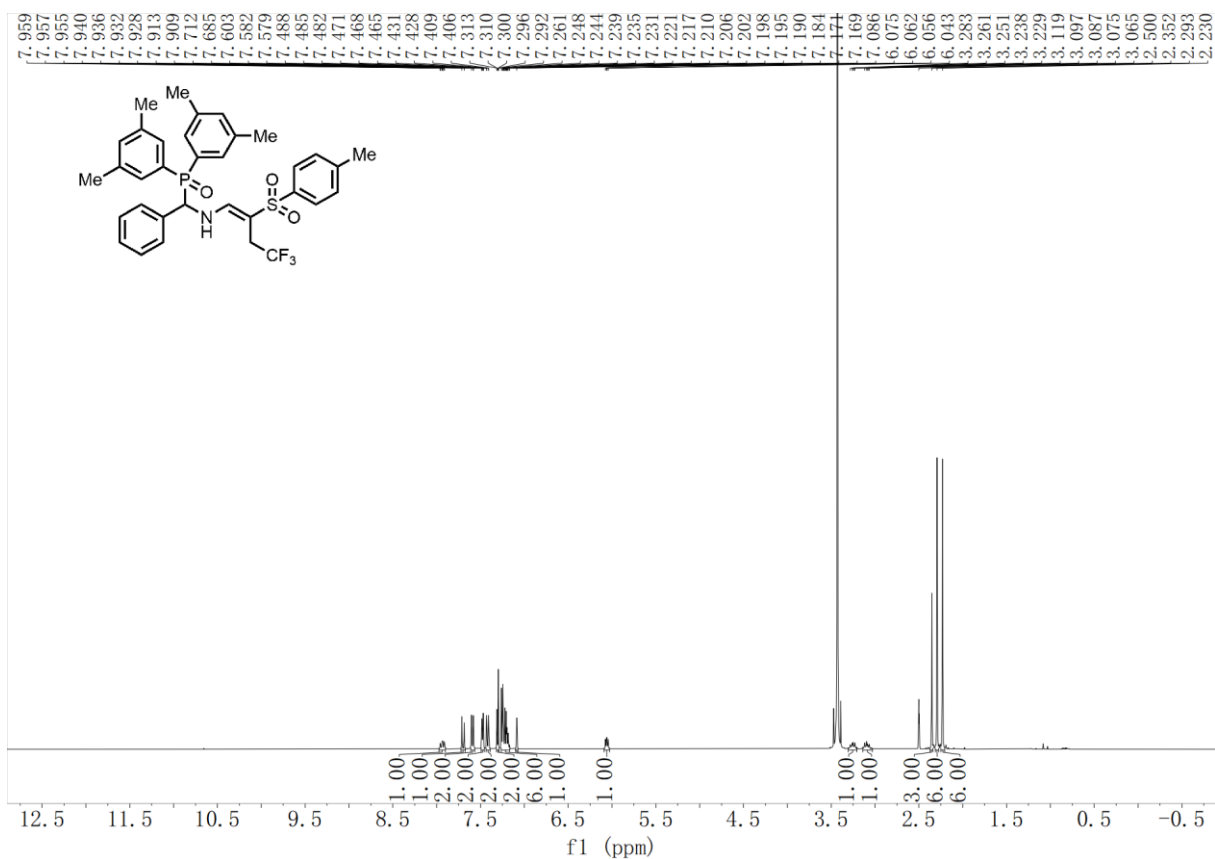

**4ad** – <sup>13</sup>C NMR (126 MHz, DMSO)

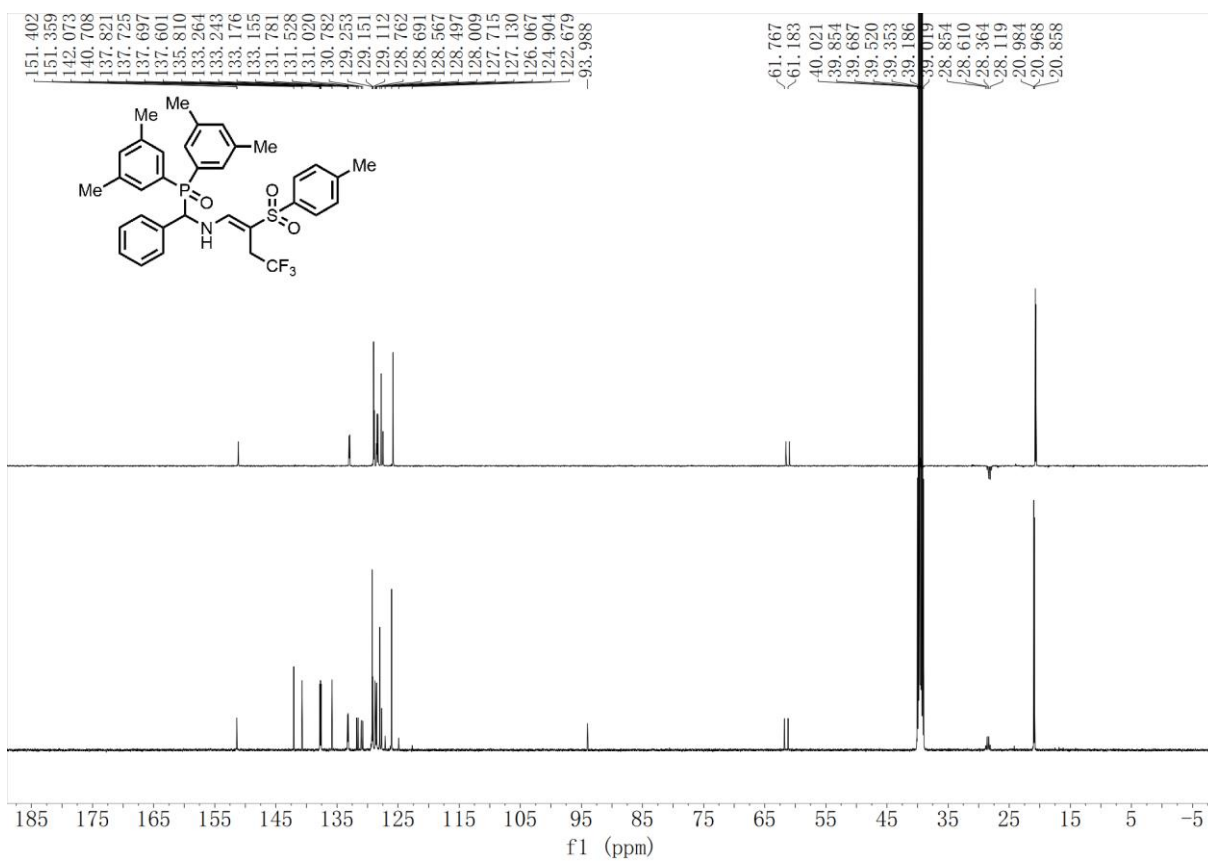

**4ad** –  $^{19}\text{F}$  NMR (282 MHz, DMSO)

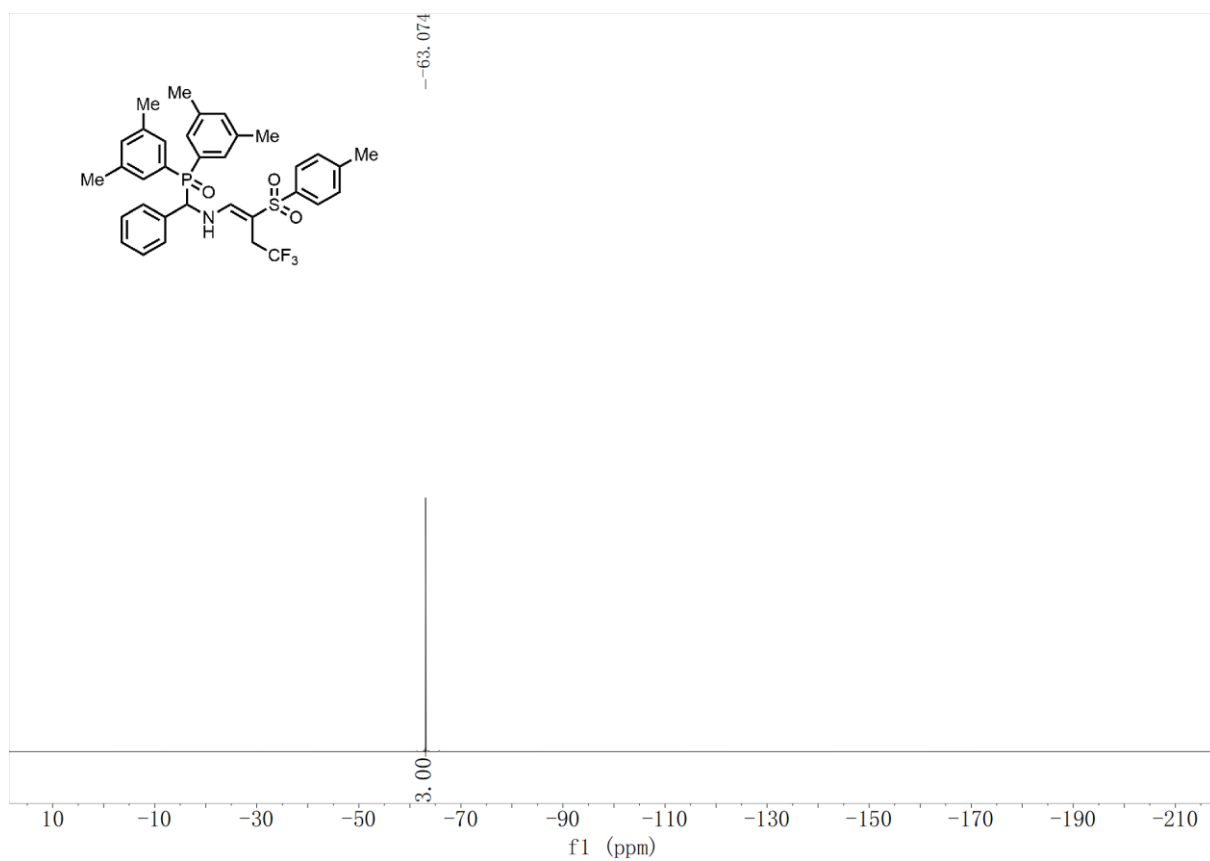

**4ad** –  $^{31}\text{P}$  NMR (121 MHz, DMSO)

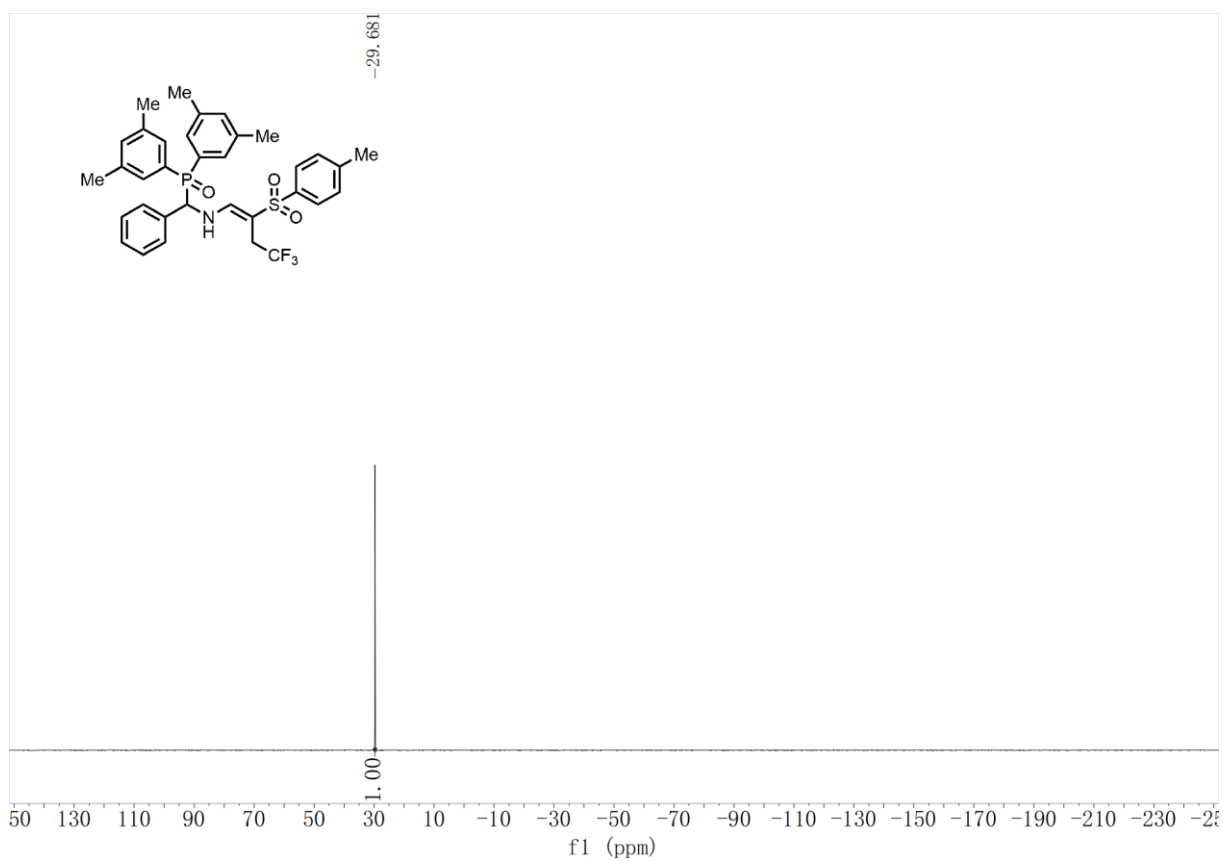

**4ae** – <sup>1</sup>H NMR (500 MHz, DMSO)

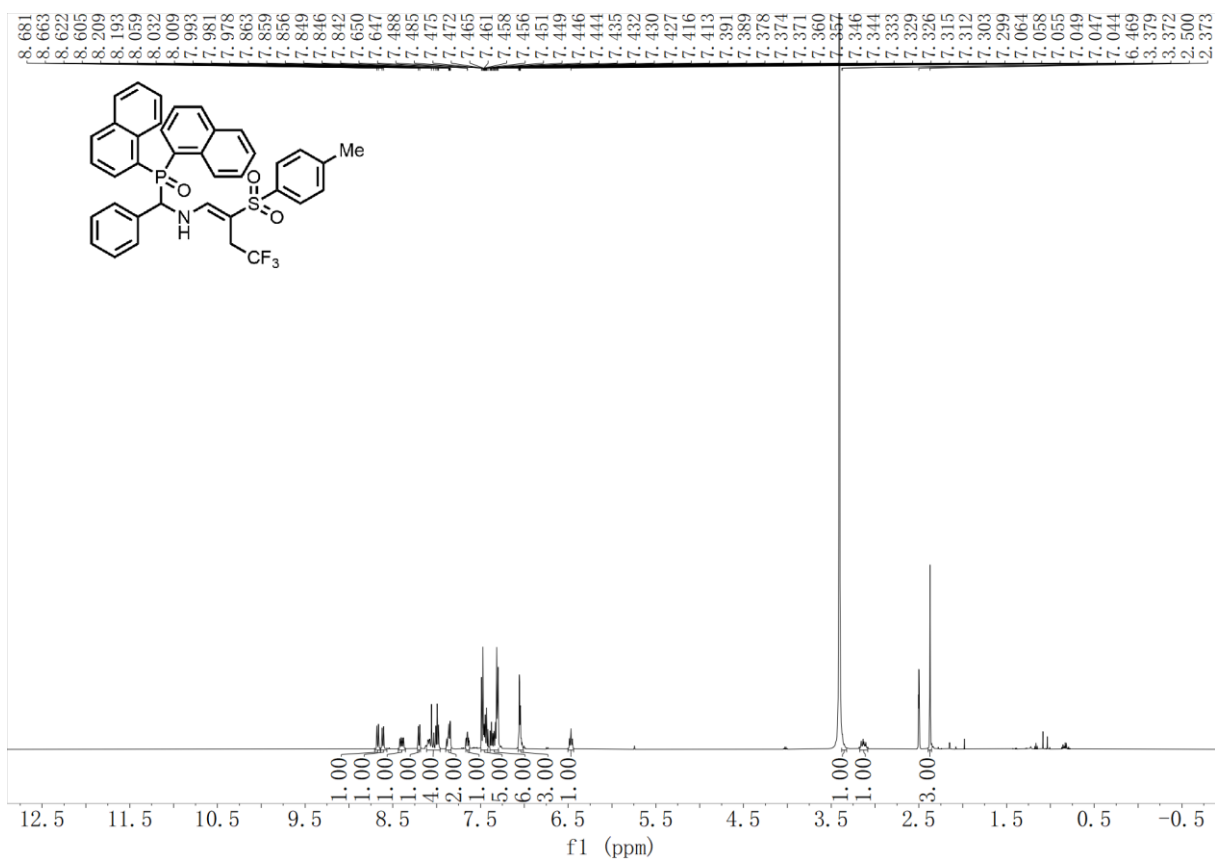

**4ae** – <sup>13</sup>C NMR (126 MHz, DMSO)

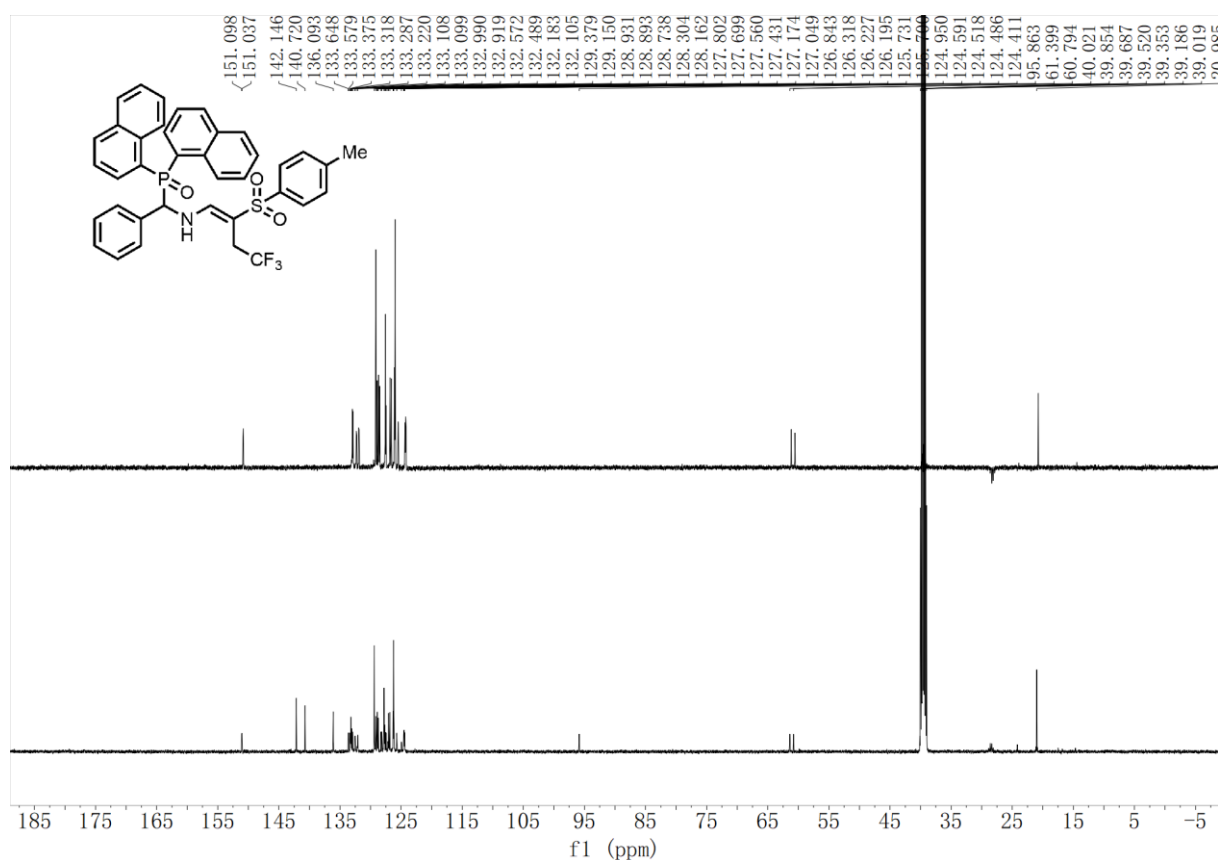

**4ae** –  $^{19}\text{F}$  NMR (471 MHz, DMSO)

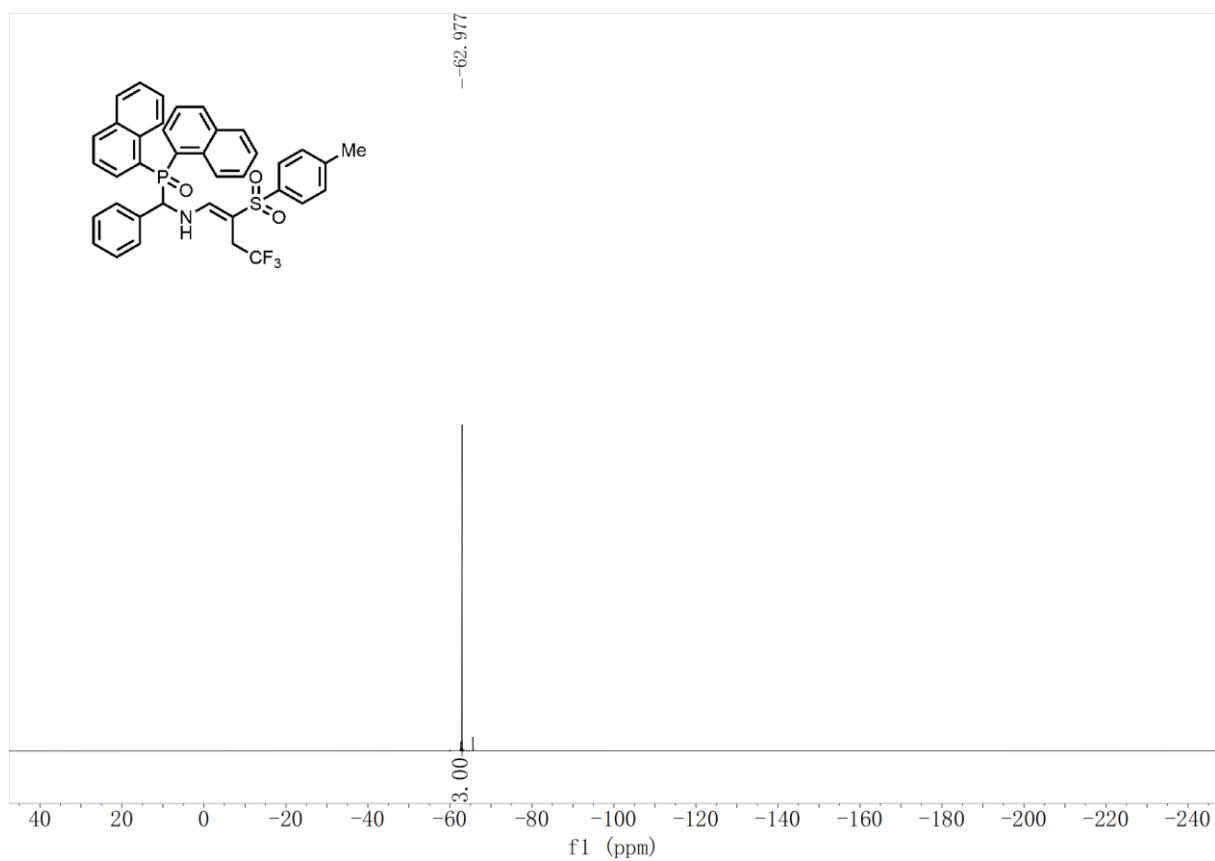

**4ae** –  $^{31}\text{P}$  NMR (202 MHz, DMSO)

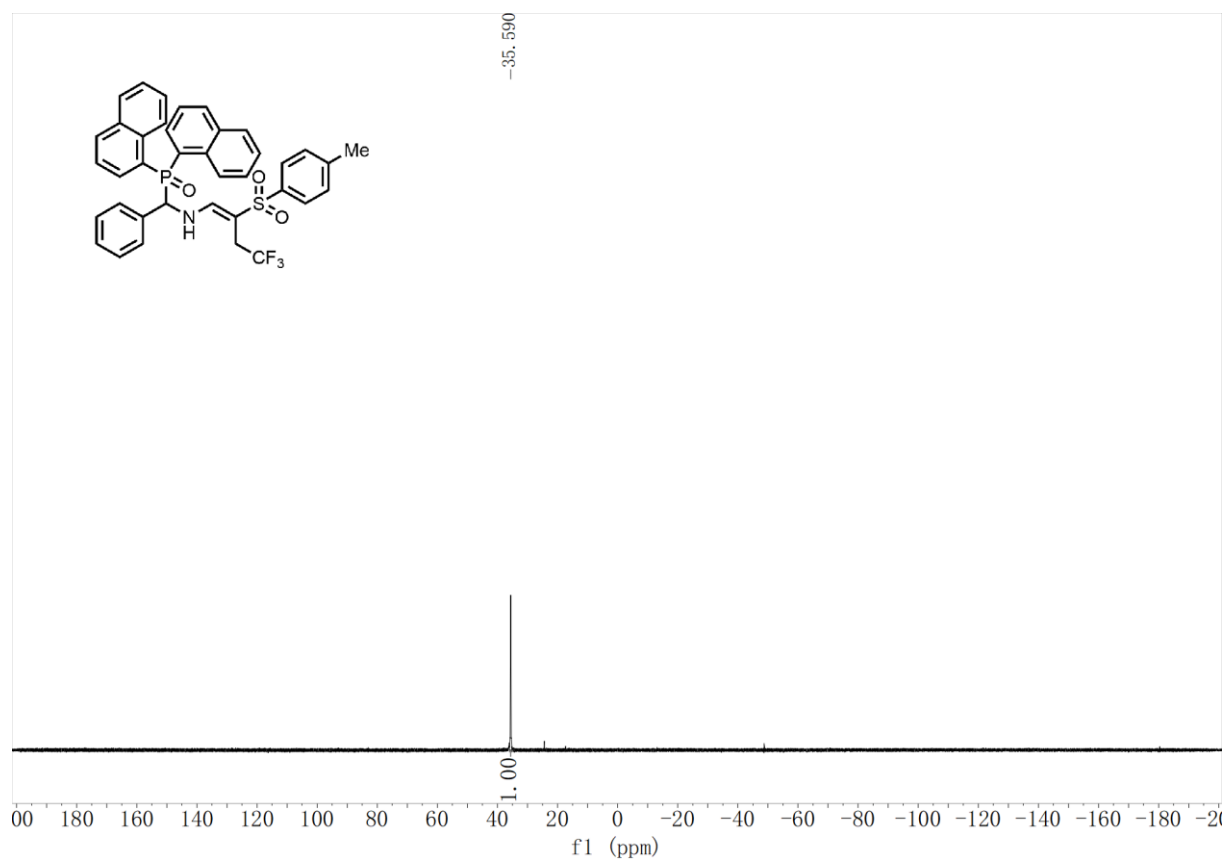

5 – <sup>1</sup>H NMR (500 MHz, C<sub>6</sub>D<sub>6</sub>)

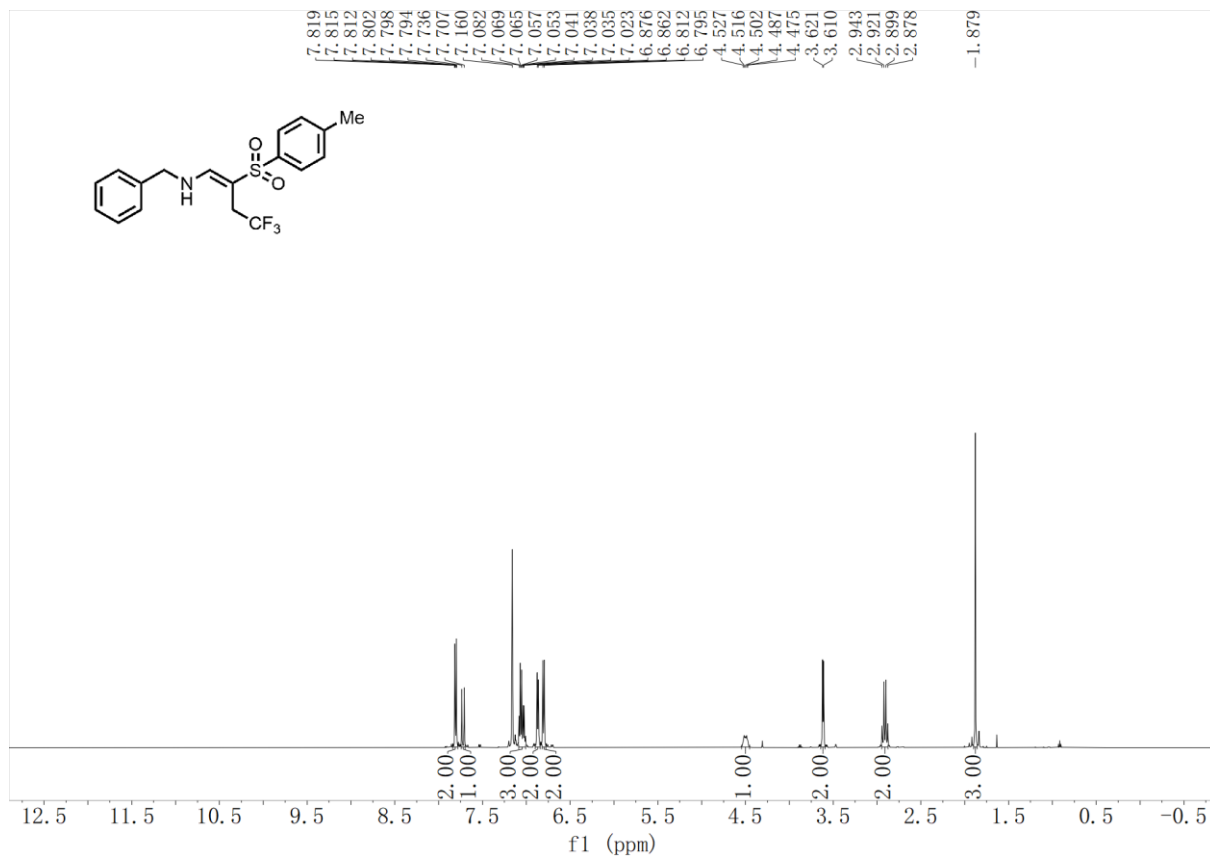

5 – <sup>13</sup>C NMR (126 MHz, C<sub>6</sub>D<sub>6</sub>)

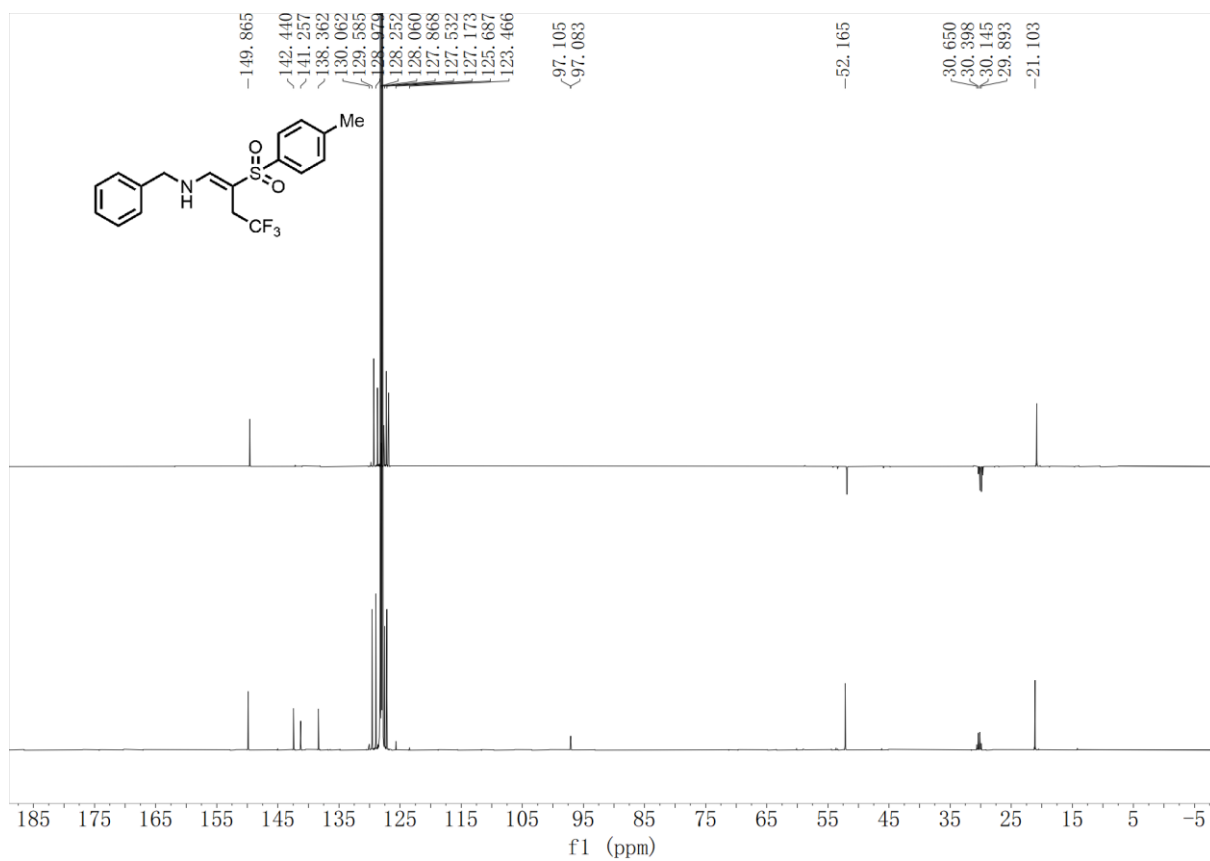



5 –  $^{19}\text{F}$  NMR (282 MHz,  $\text{C}_6\text{D}_6$ )

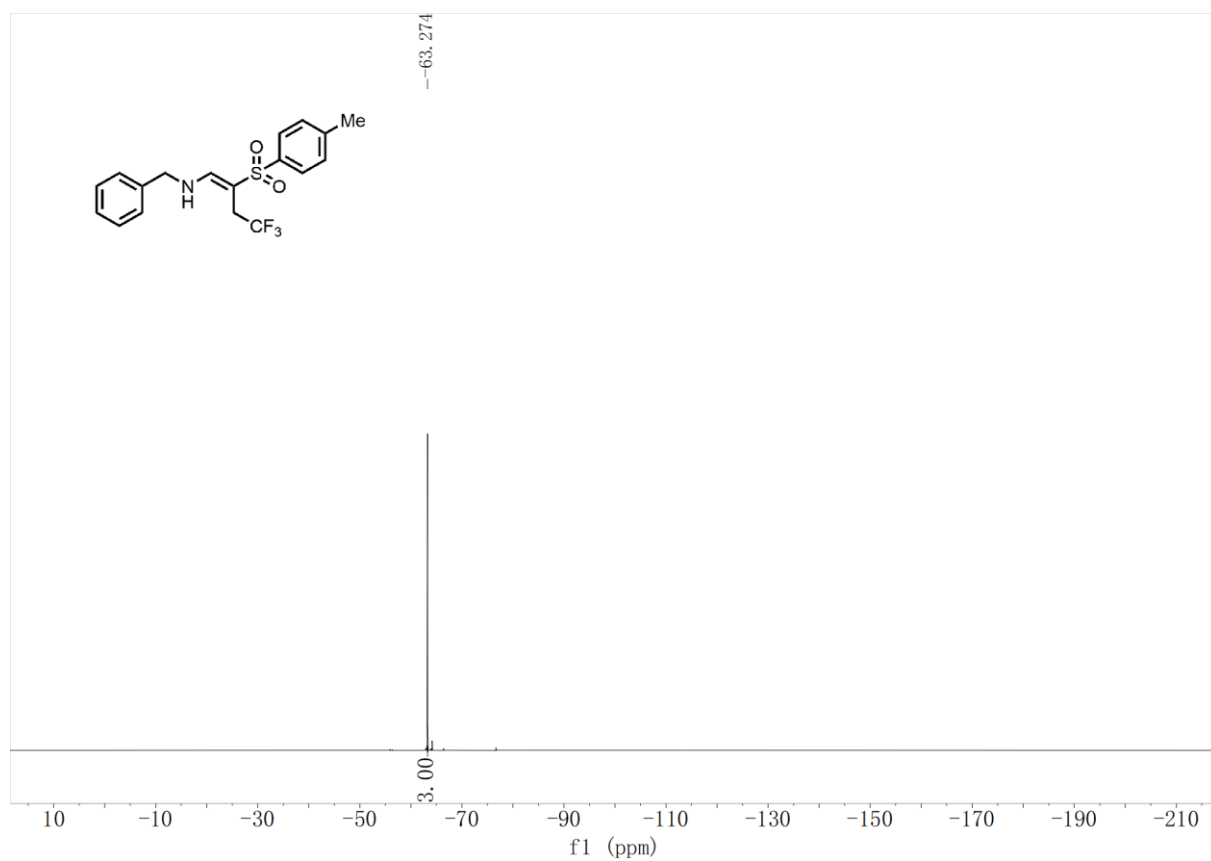

6 - <sup>1</sup>H NMR (500 MHz, DMSO)

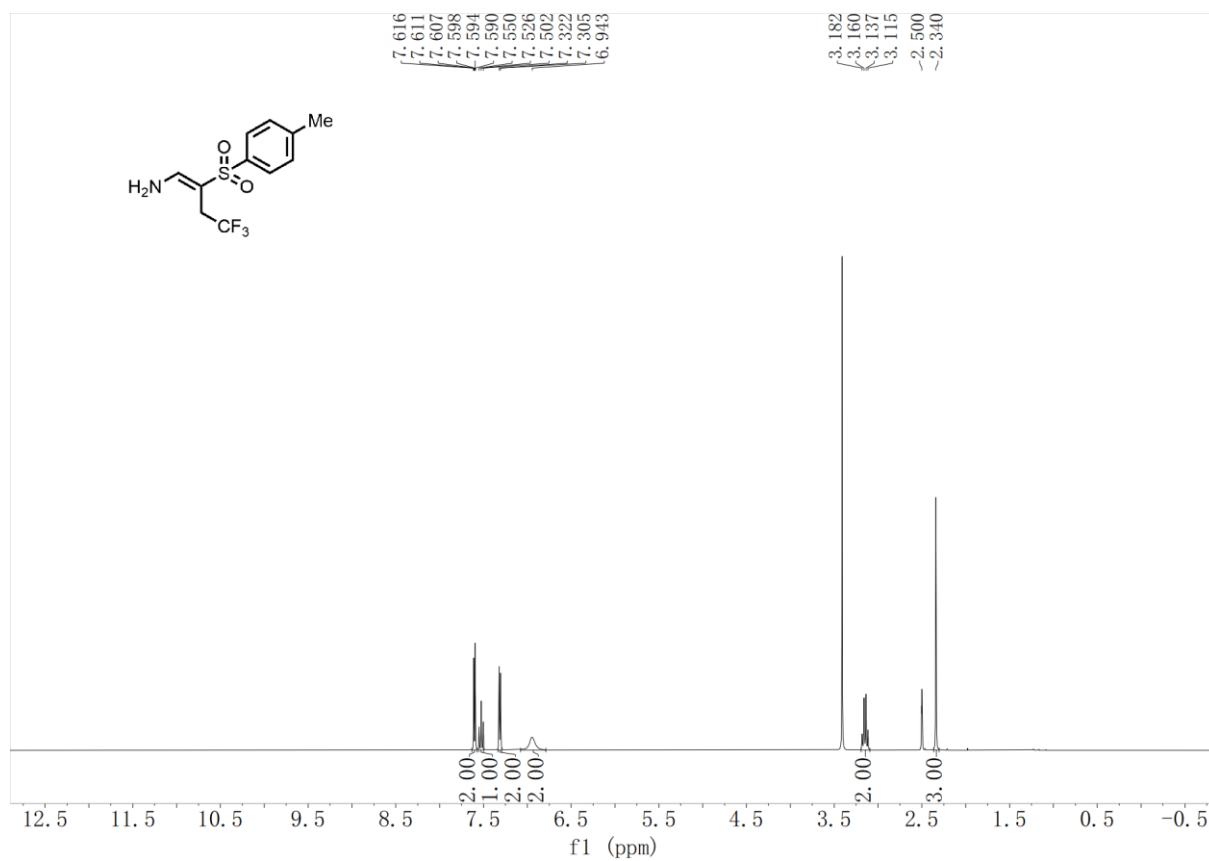

6 - <sup>13</sup>C NMR (126 MHz, DMSO)

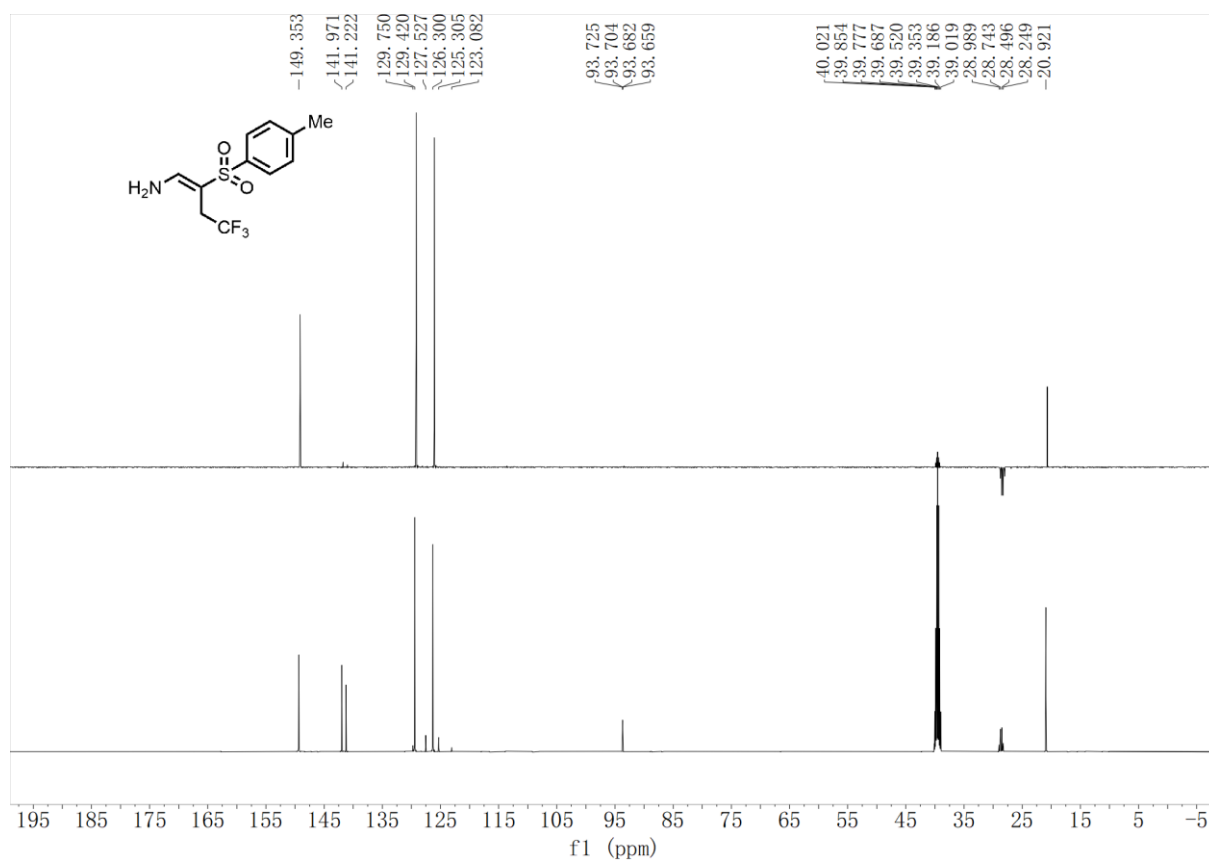

6 –  $^{19}\text{F}$  NMR (471 MHz, DMSO)

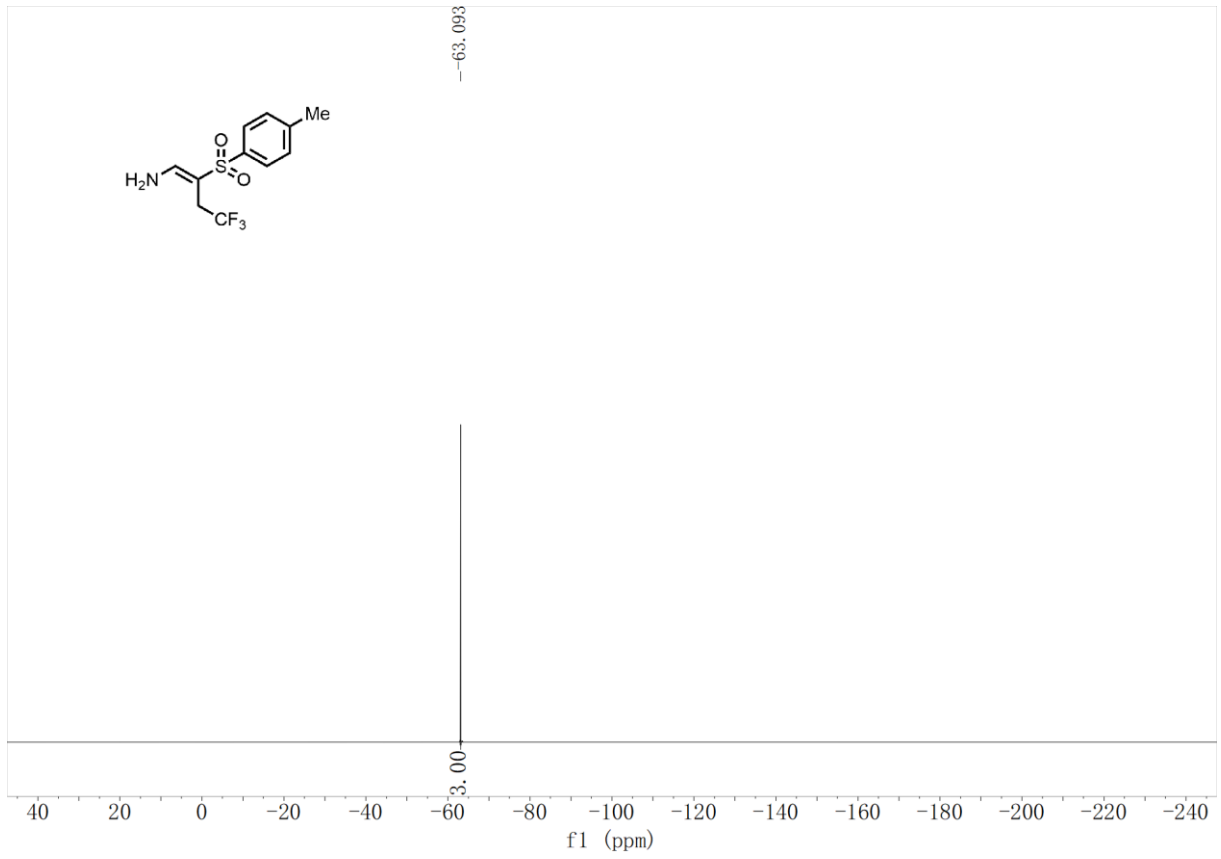

7f – <sup>1</sup>H NMR (500 MHz, CDCl<sub>3</sub>)

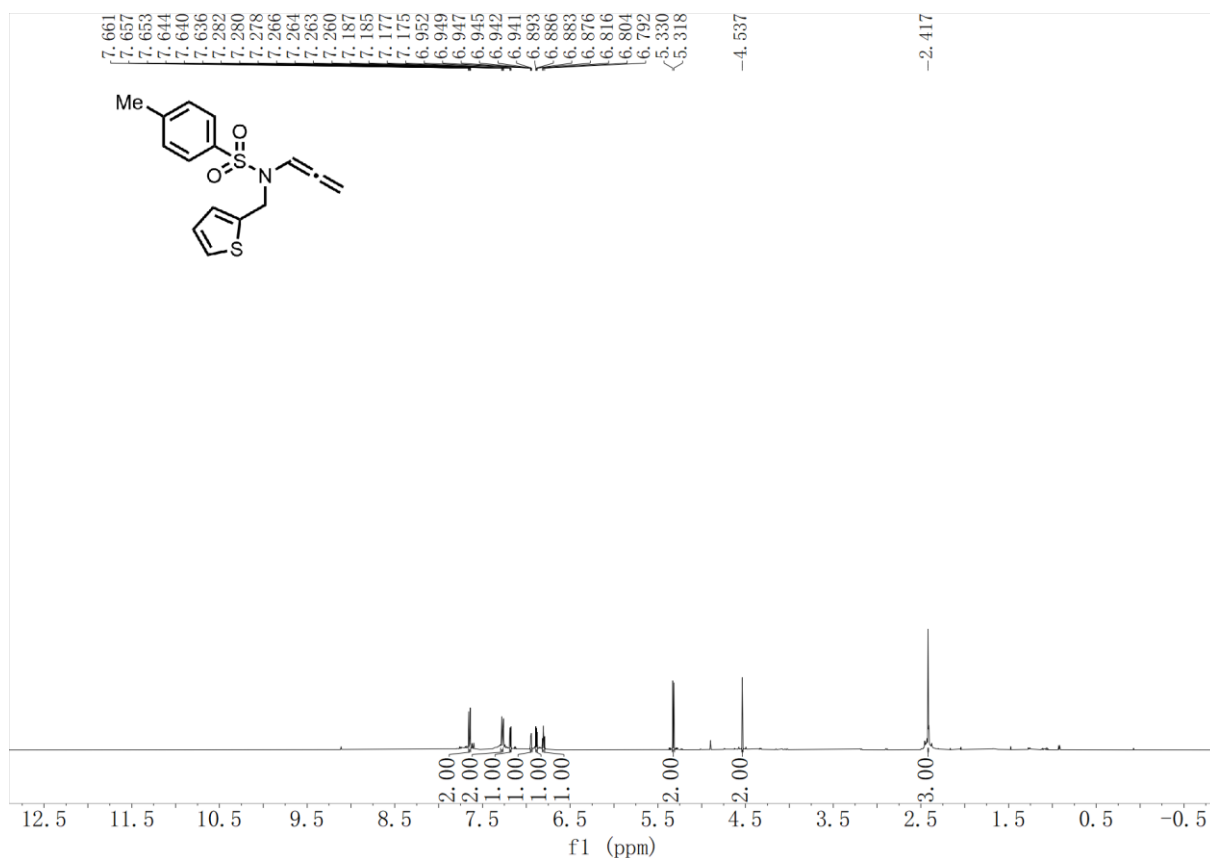

7f – <sup>13</sup>C NMR (126 MHz, CDCl<sub>3</sub>)

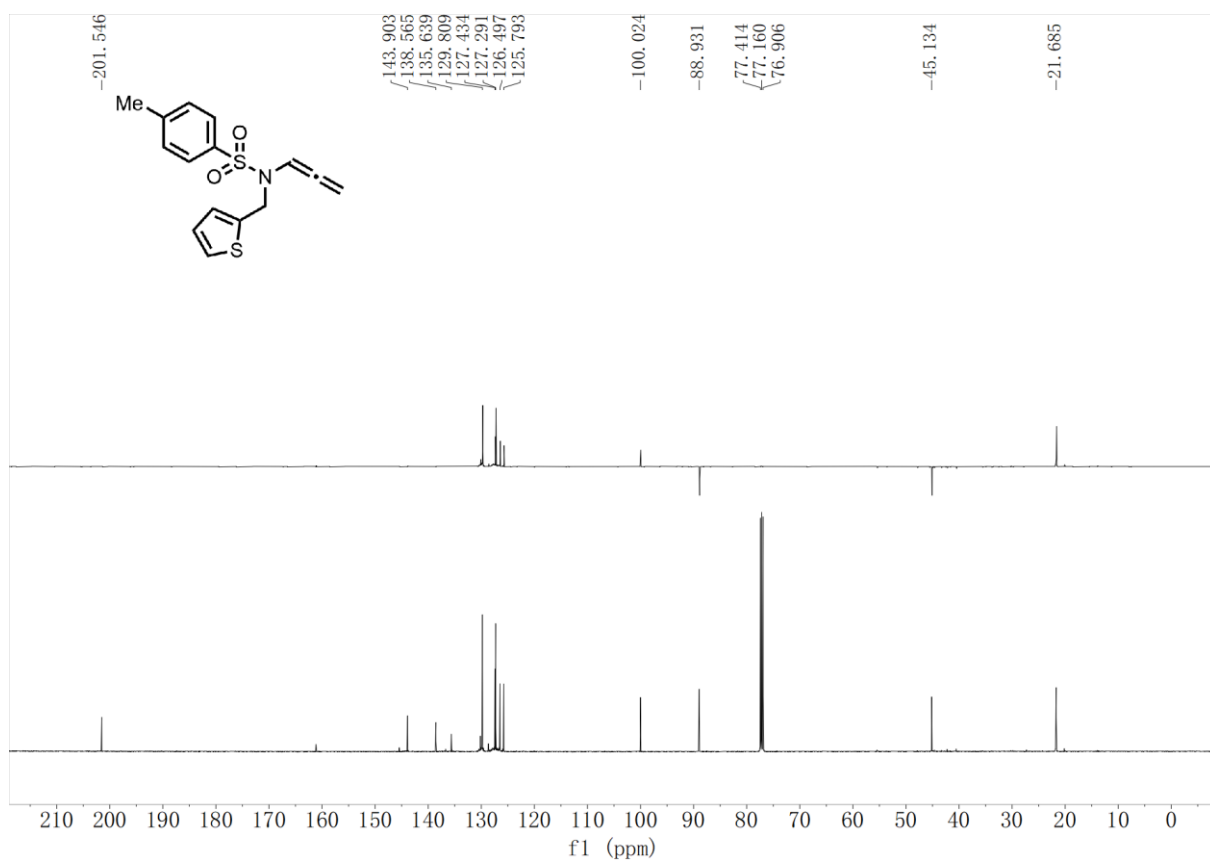

7i – <sup>1</sup>H NMR (500 MHz, CDCl<sub>3</sub>)

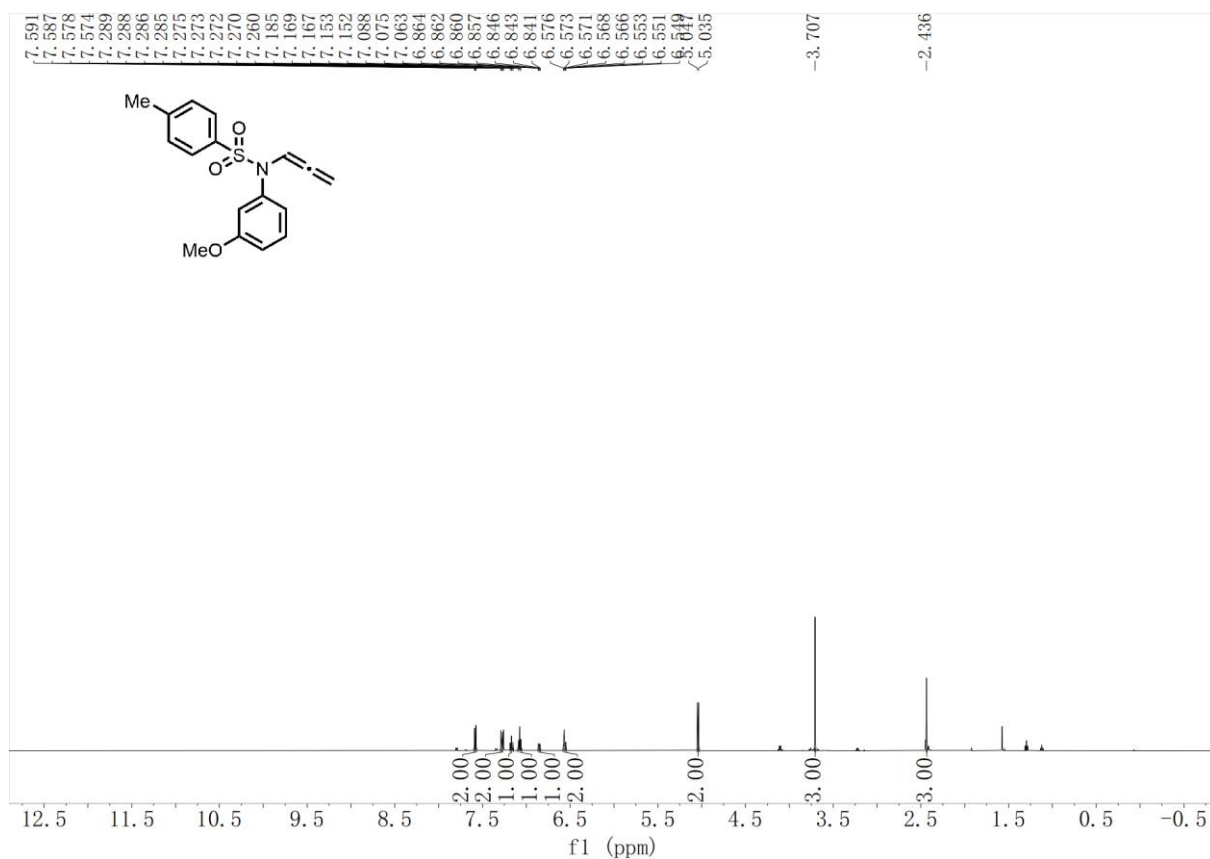

7i – <sup>13</sup>C NMR (126 MHz, CDCl<sub>3</sub>)

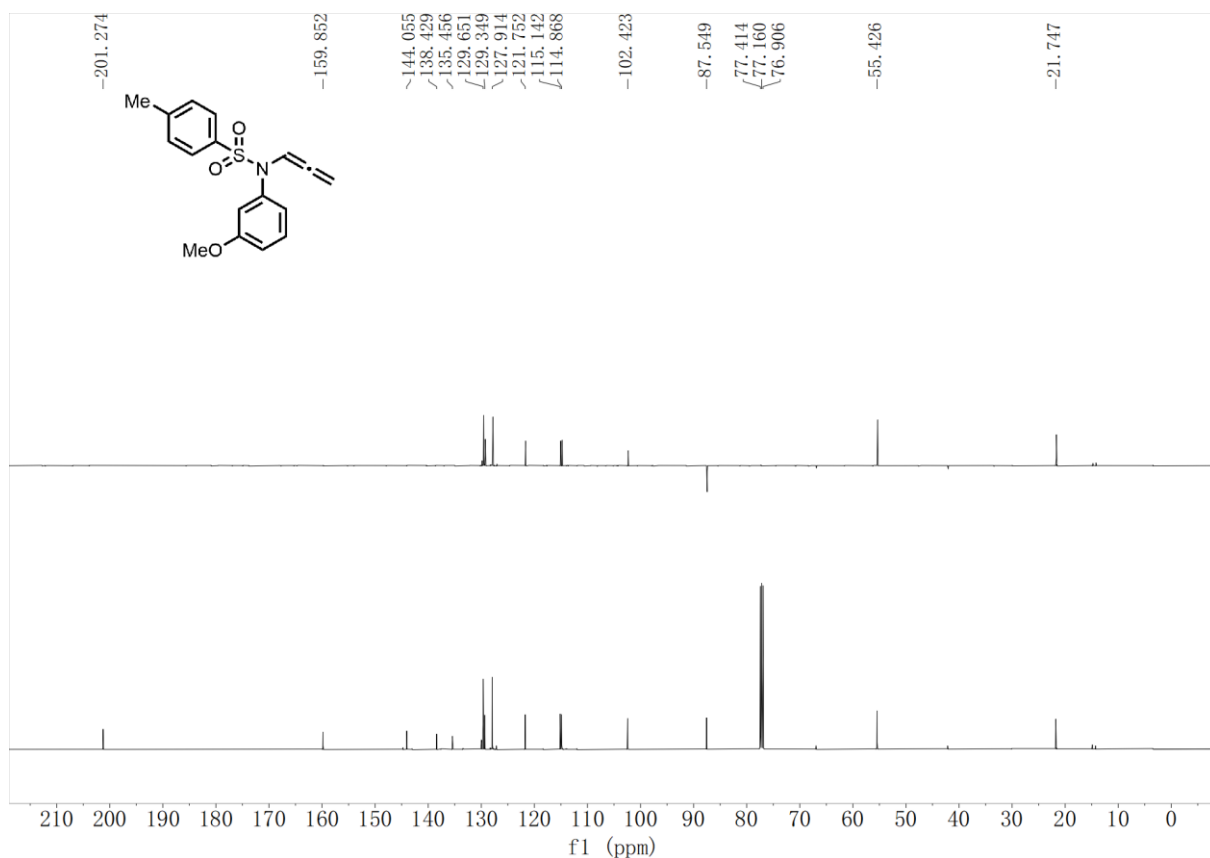

7j – <sup>1</sup>H NMR (500 MHz, CDCl<sub>3</sub>)

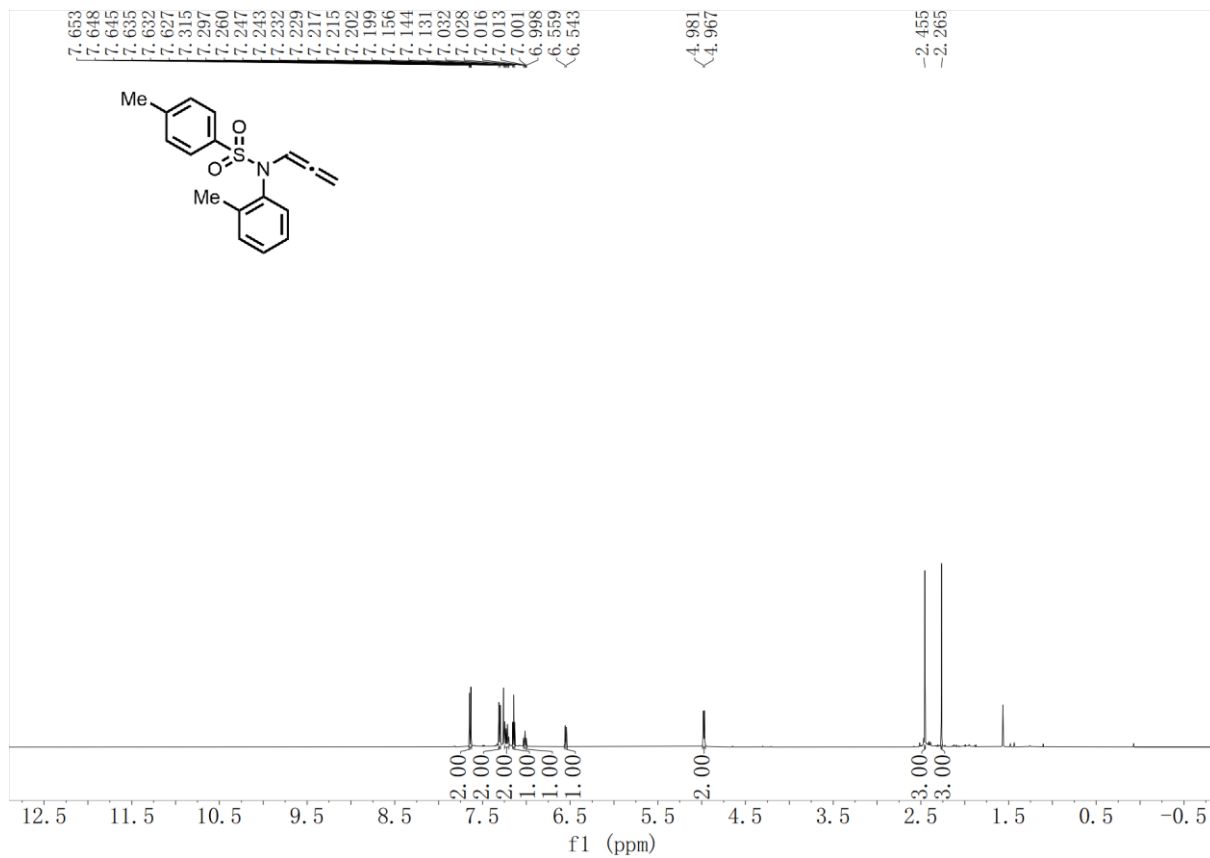

7j – <sup>13</sup>C NMR (126 MHz, CDCl<sub>3</sub>)

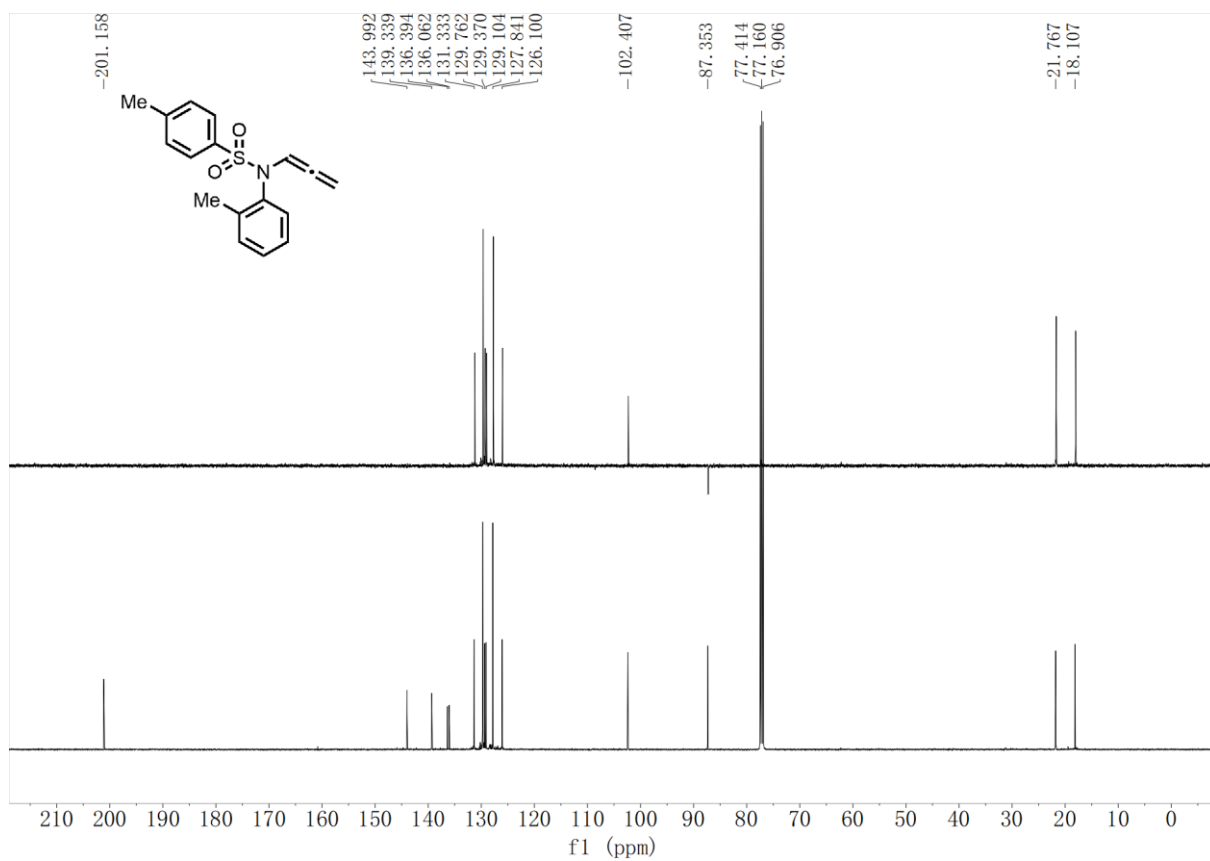

**7k** – <sup>1</sup>H NMR (500 MHz, CDCl<sub>3</sub>)

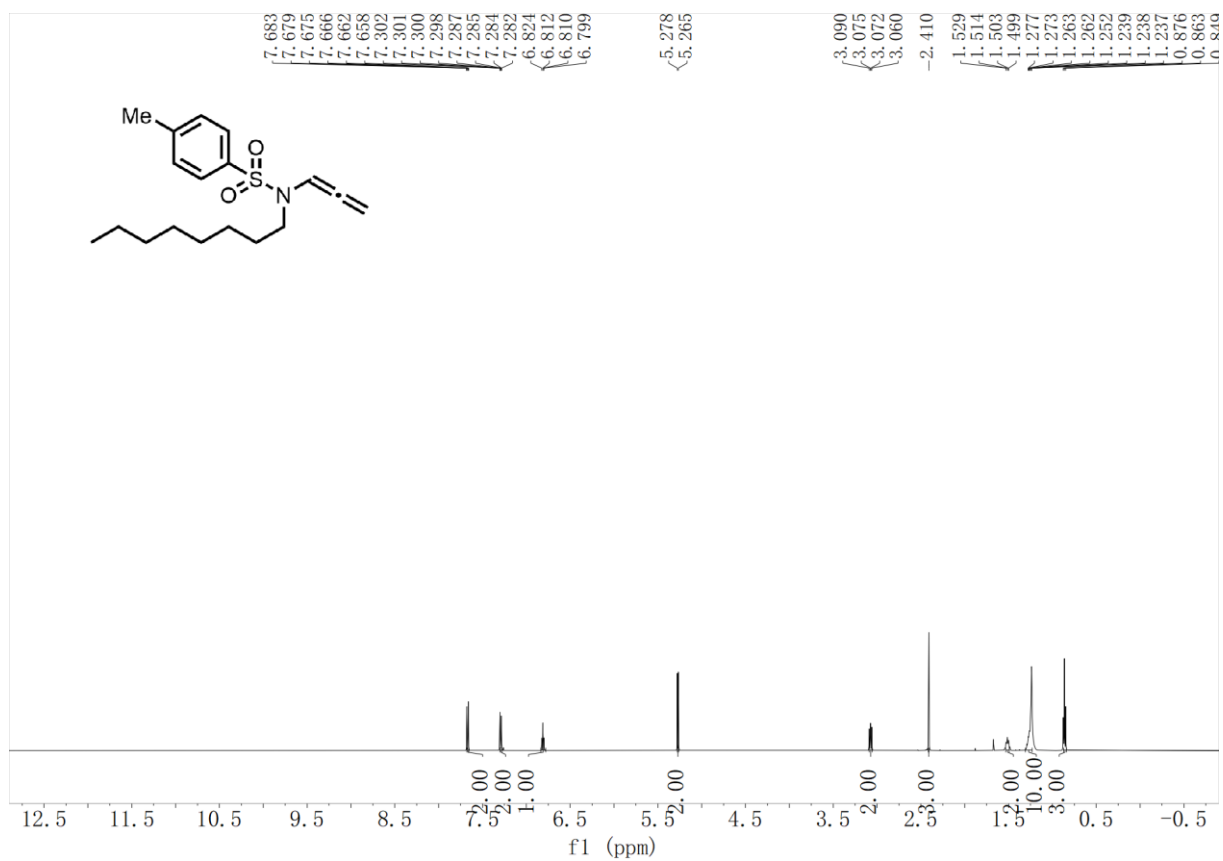

**7k** – <sup>13</sup>C NMR (126 MHz, CDCl<sub>3</sub>)

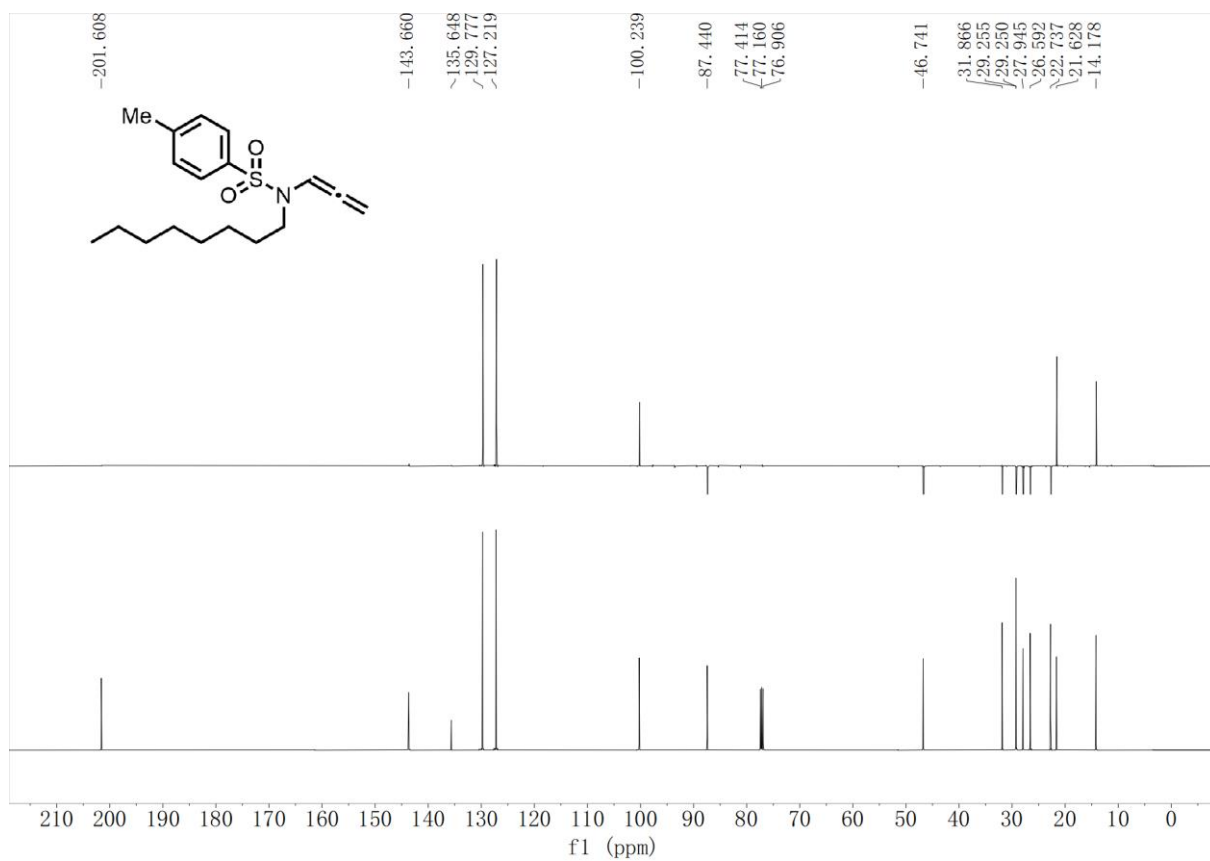

7m – <sup>1</sup>H NMR (500 MHz, CDCl<sub>3</sub>)

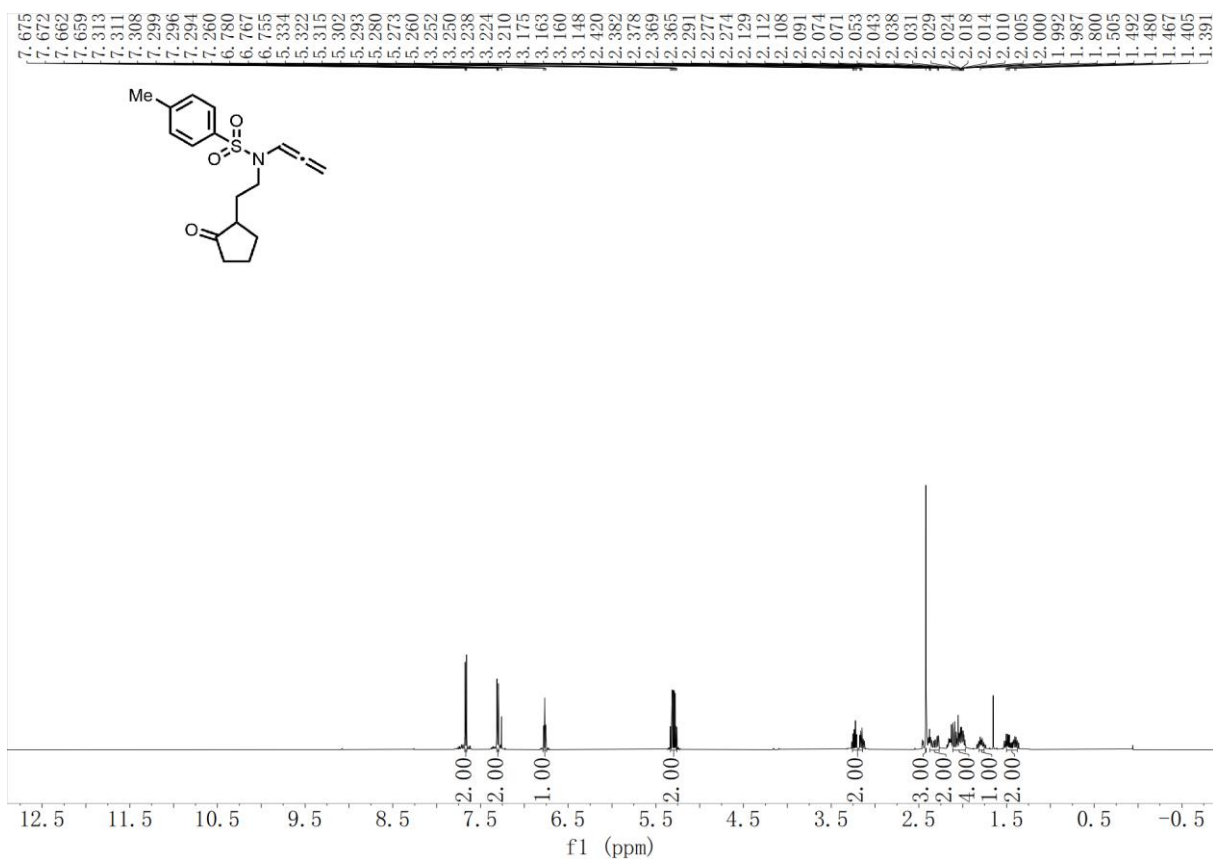

7m – <sup>13</sup>C NMR (126 MHz, CDCl<sub>3</sub>)

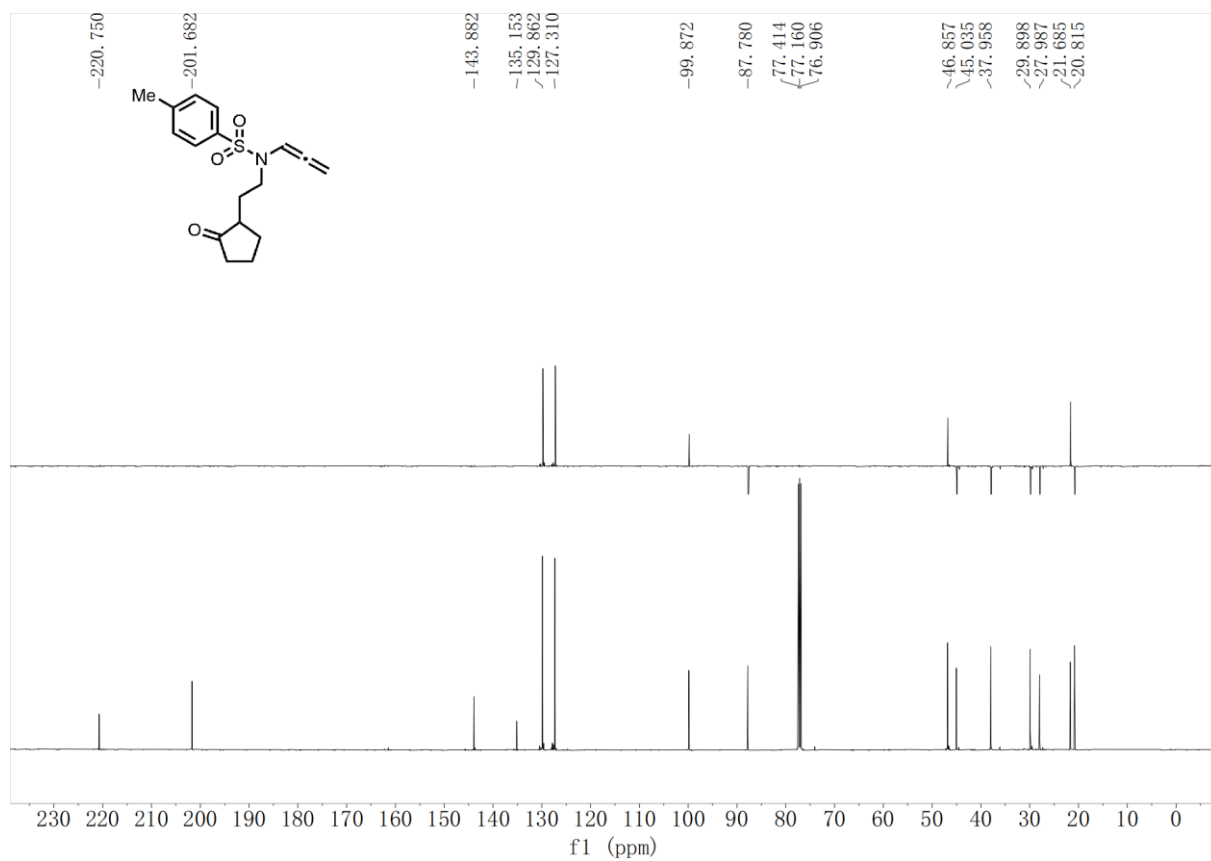



**7q** –  $^1\text{H}$  NMR (500 MHz,  $\text{CDCl}_3$ )

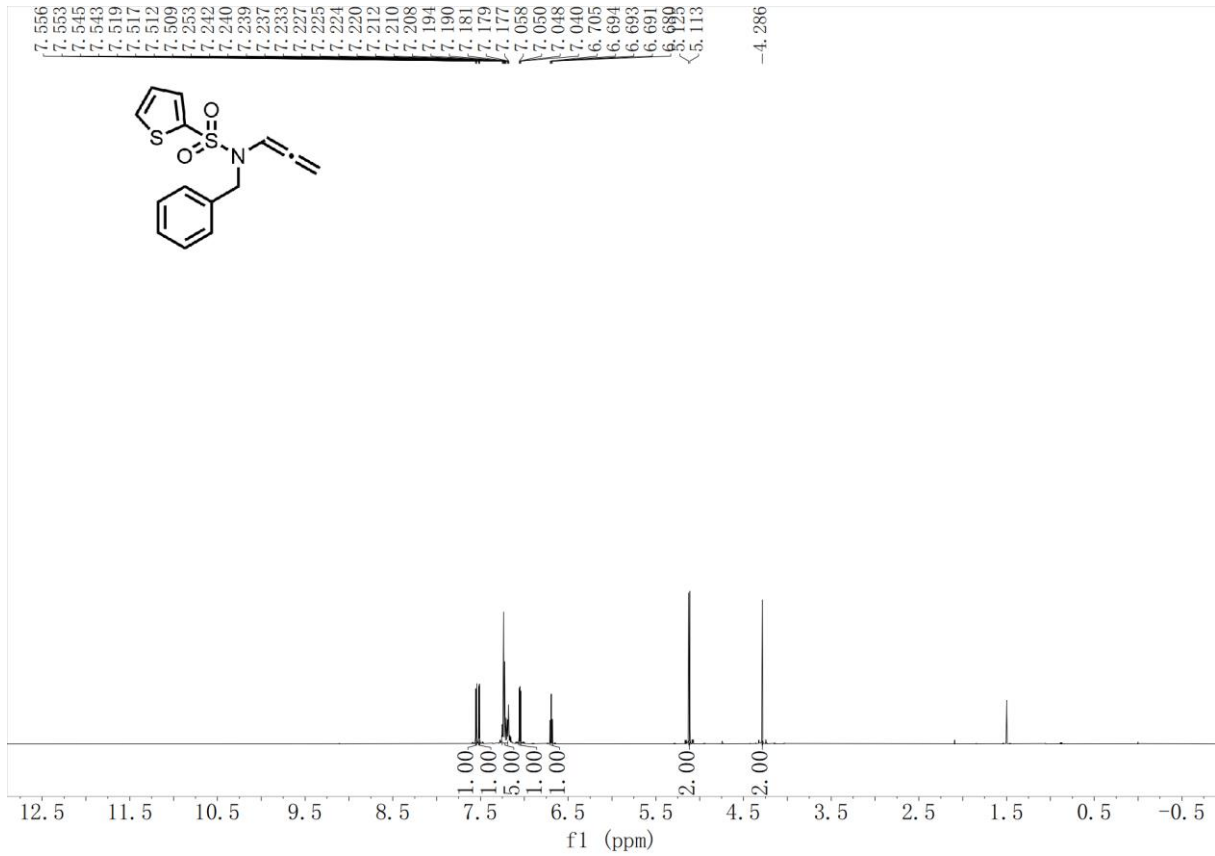

**7q** –  $^{13}\text{C}$  NMR (126 MHz,  $\text{CDCl}_3$ )

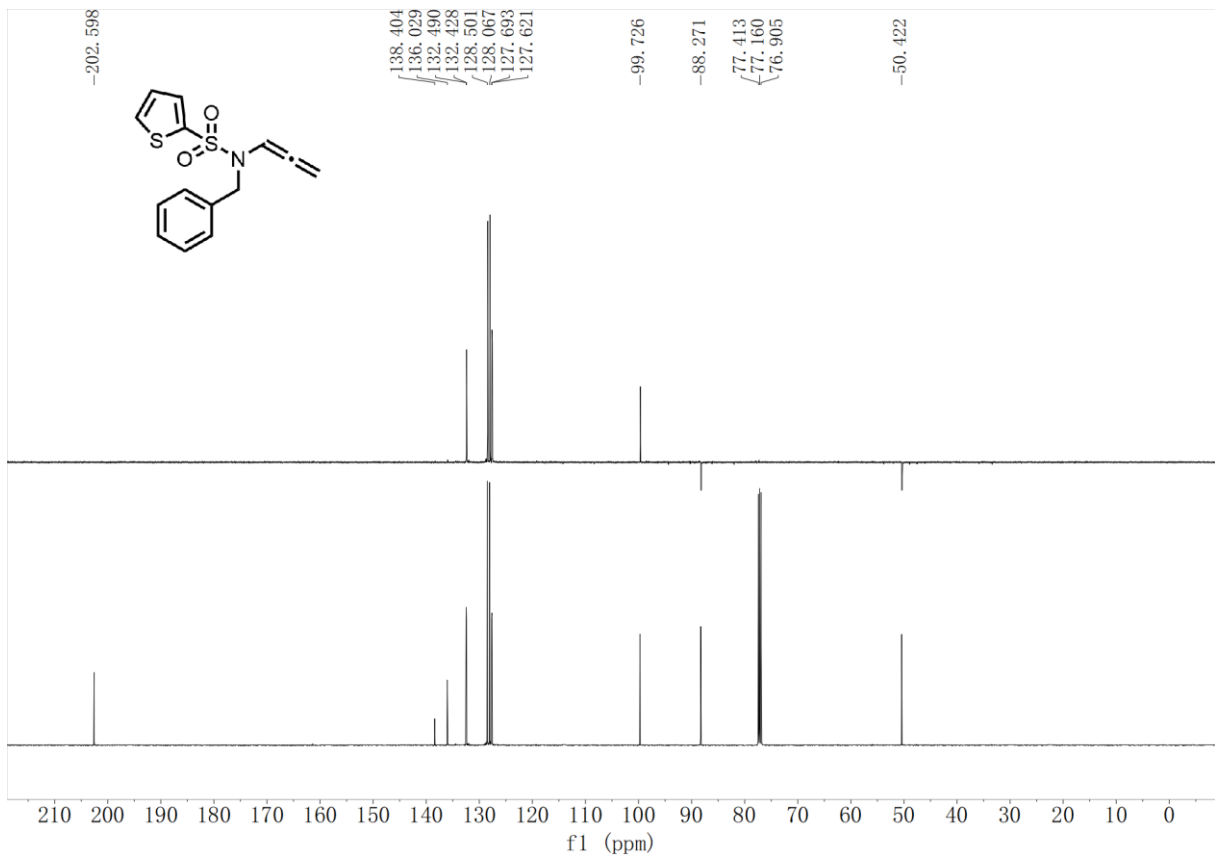

**7t** –  $^1\text{H}$  NMR (500 MHz,  $\text{CDCl}_3$ )

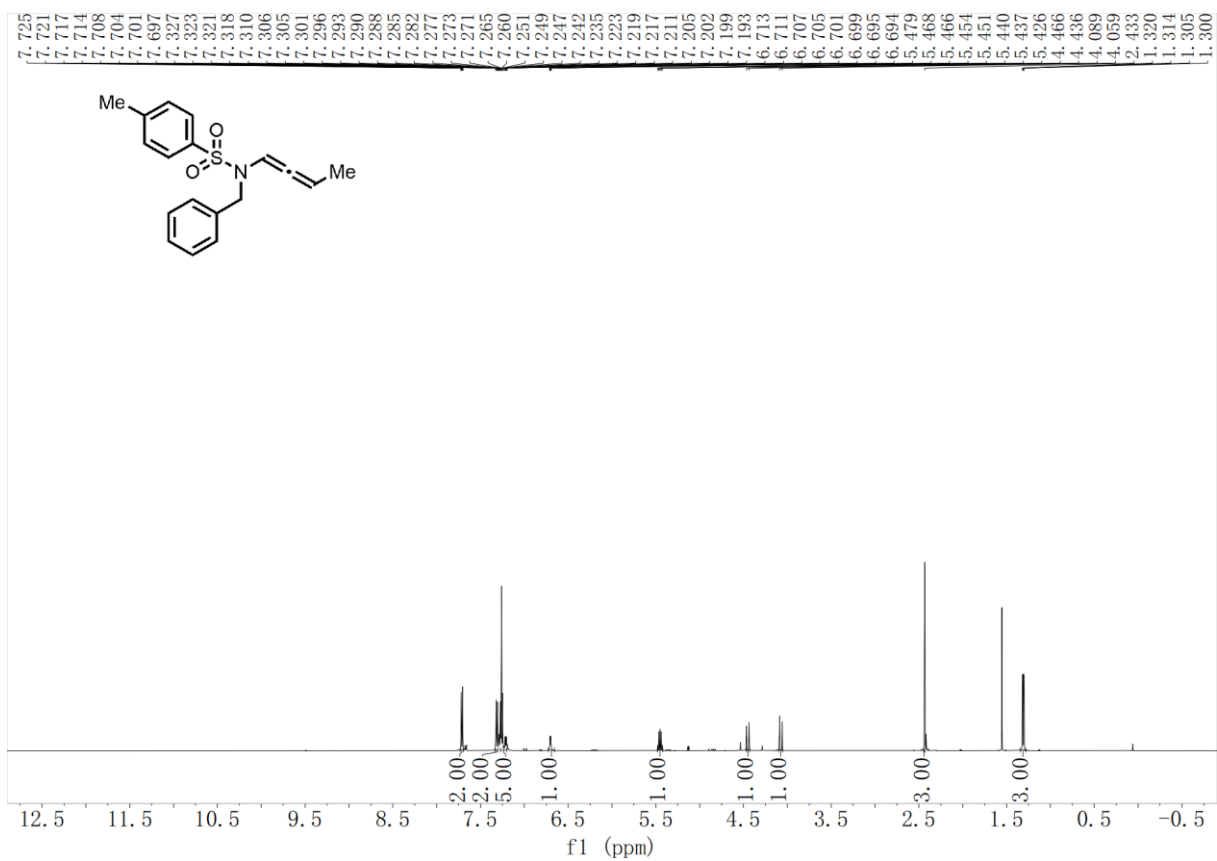

**7t** –  $^{13}\text{C}$  NMR (126 MHz,  $\text{CDCl}_3$ )

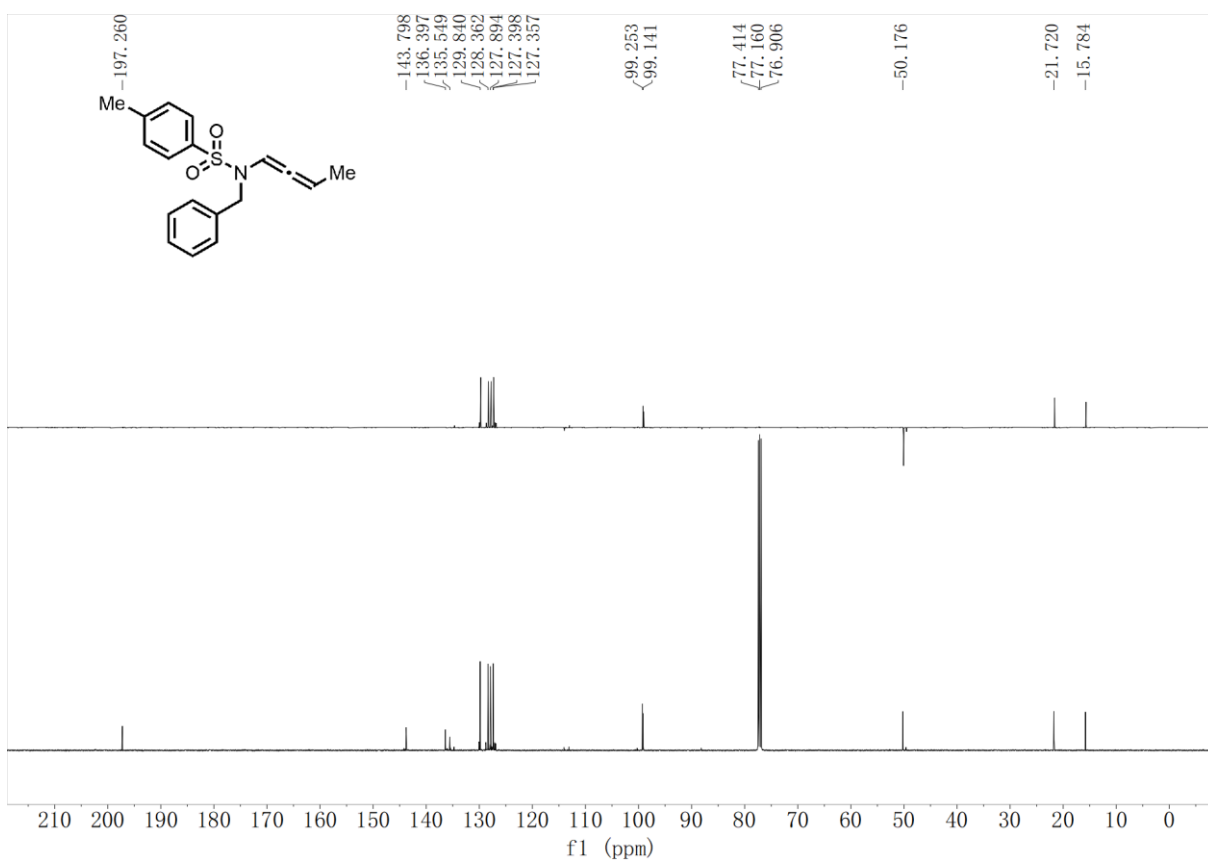

**8a** –  $^1\text{H}$  NMR (500 MHz,  $\text{CDCl}_3$ )

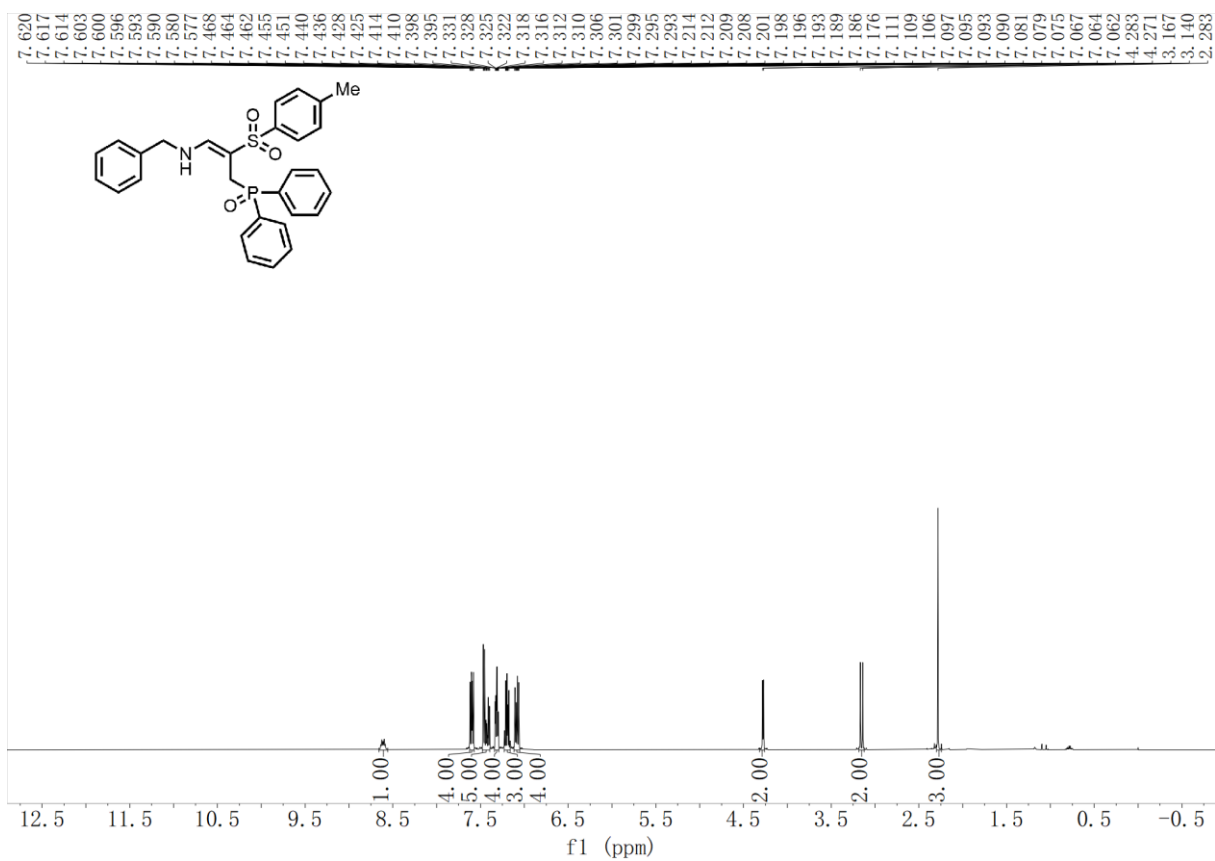

**8a** –  $^{13}\text{C}$  NMR (126 MHz,  $\text{CDCl}_3$ )

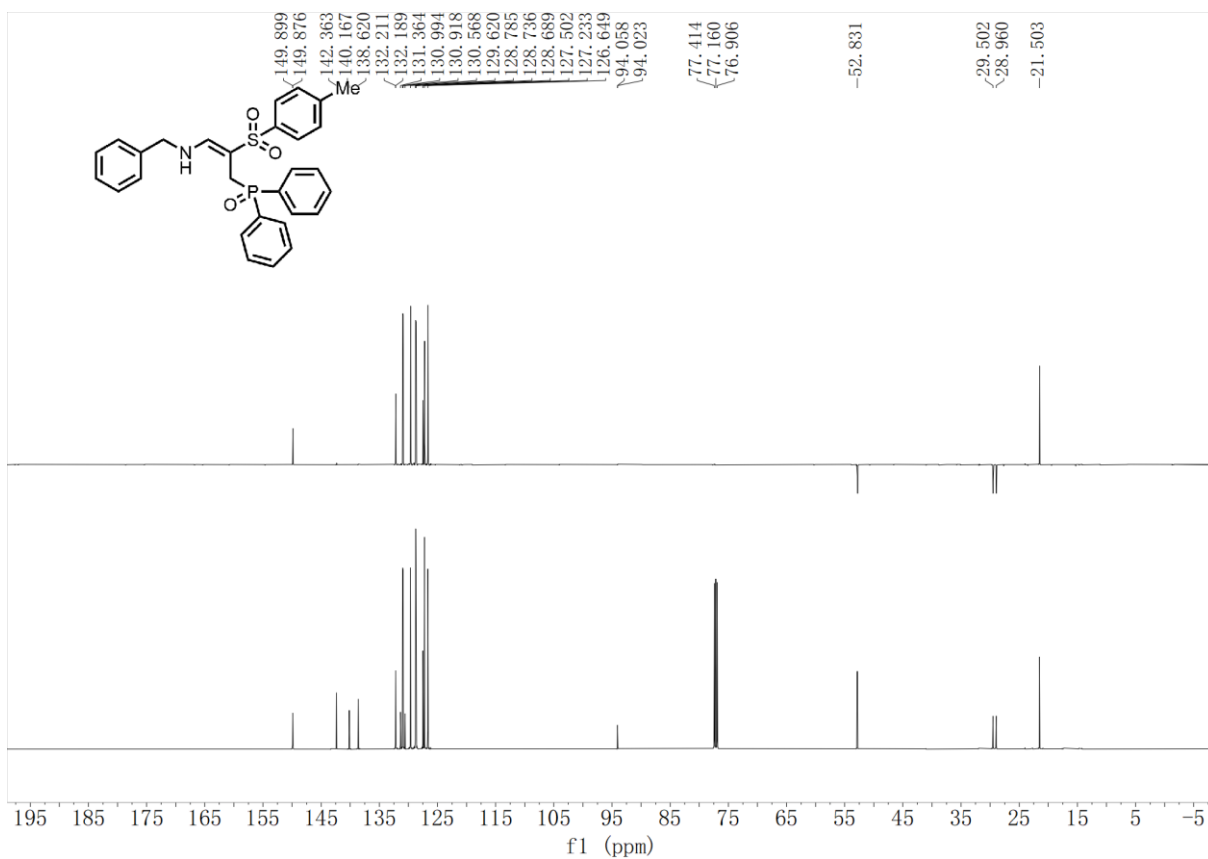

**8a** –  $^{31}\text{P}$  NMR (121 MHz,  $\text{CDCl}_3$ )

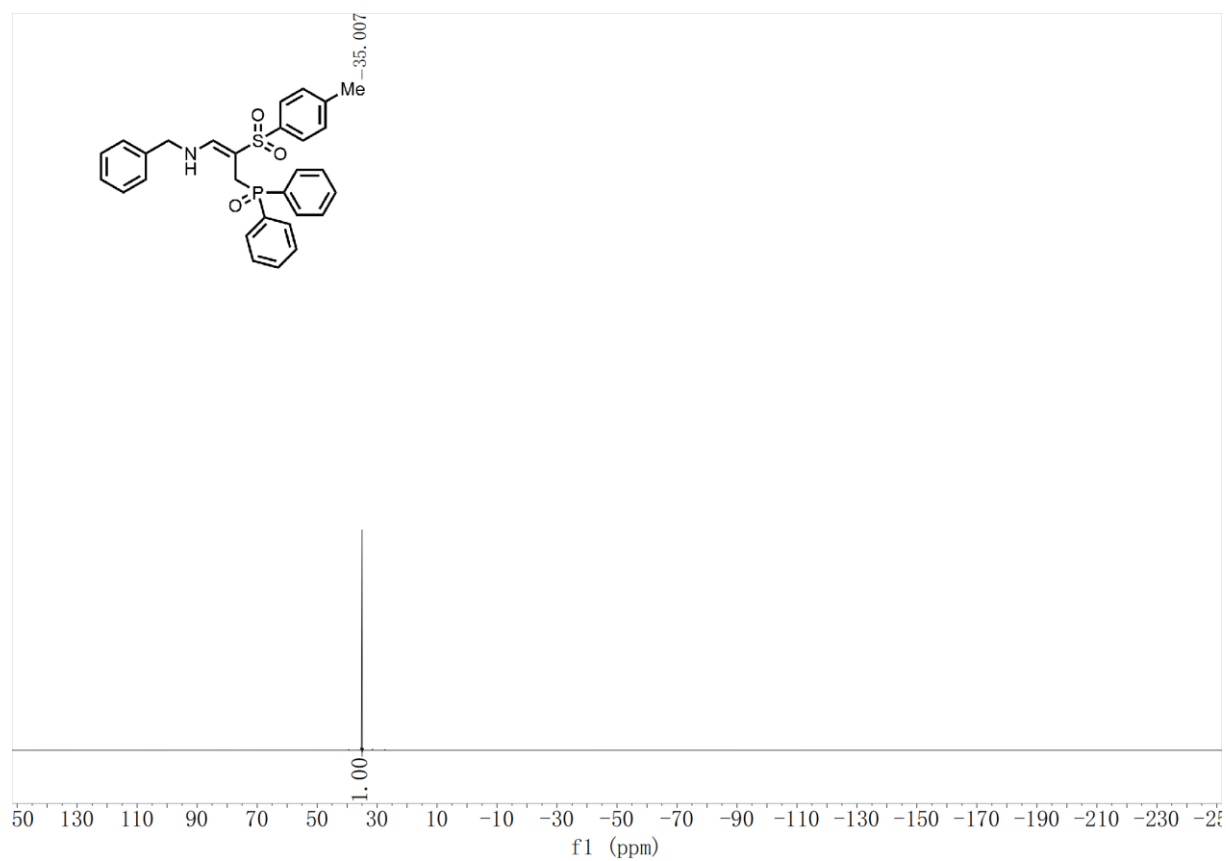

**8b** –  $^1\text{H}$  NMR (500 MHz,  $\text{CDCl}_3$ )

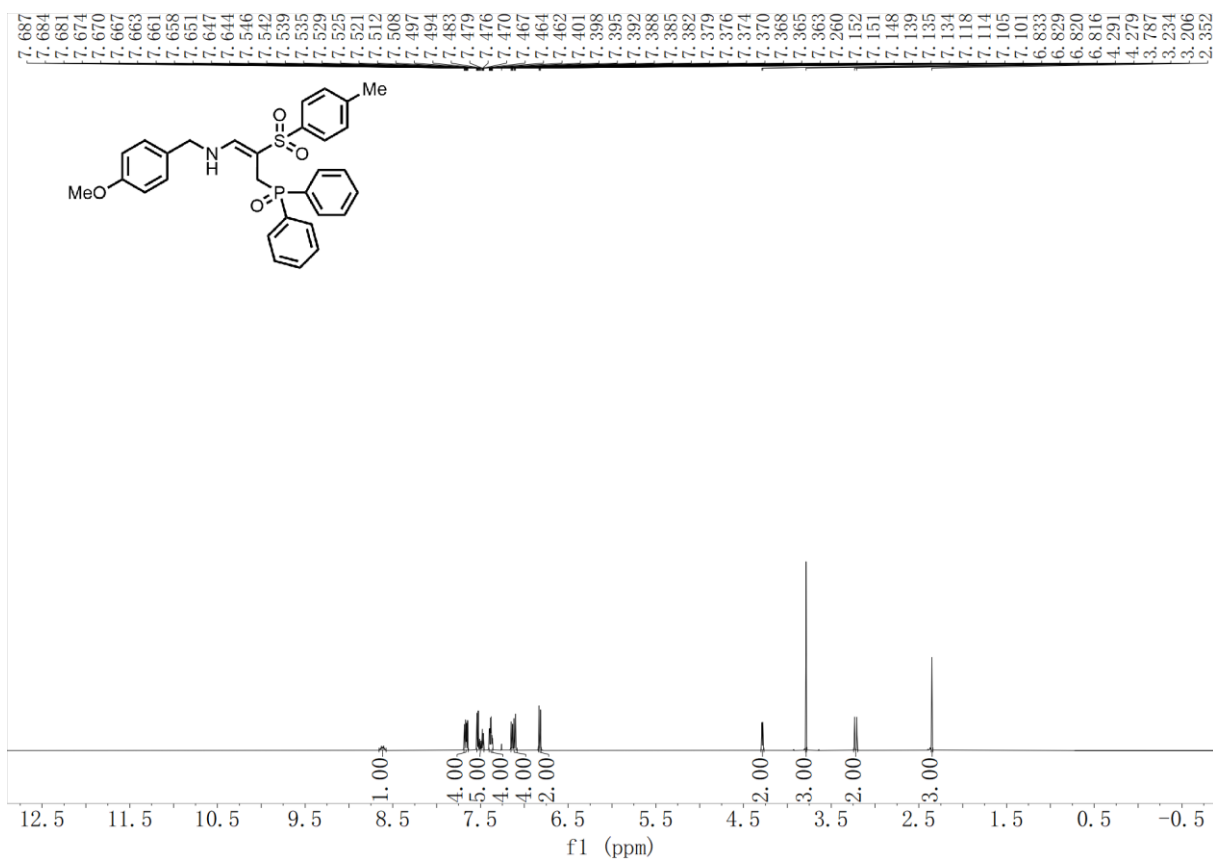

**8b** –  $^{13}\text{C}$  NMR (126 MHz,  $\text{CDCl}_3$ )

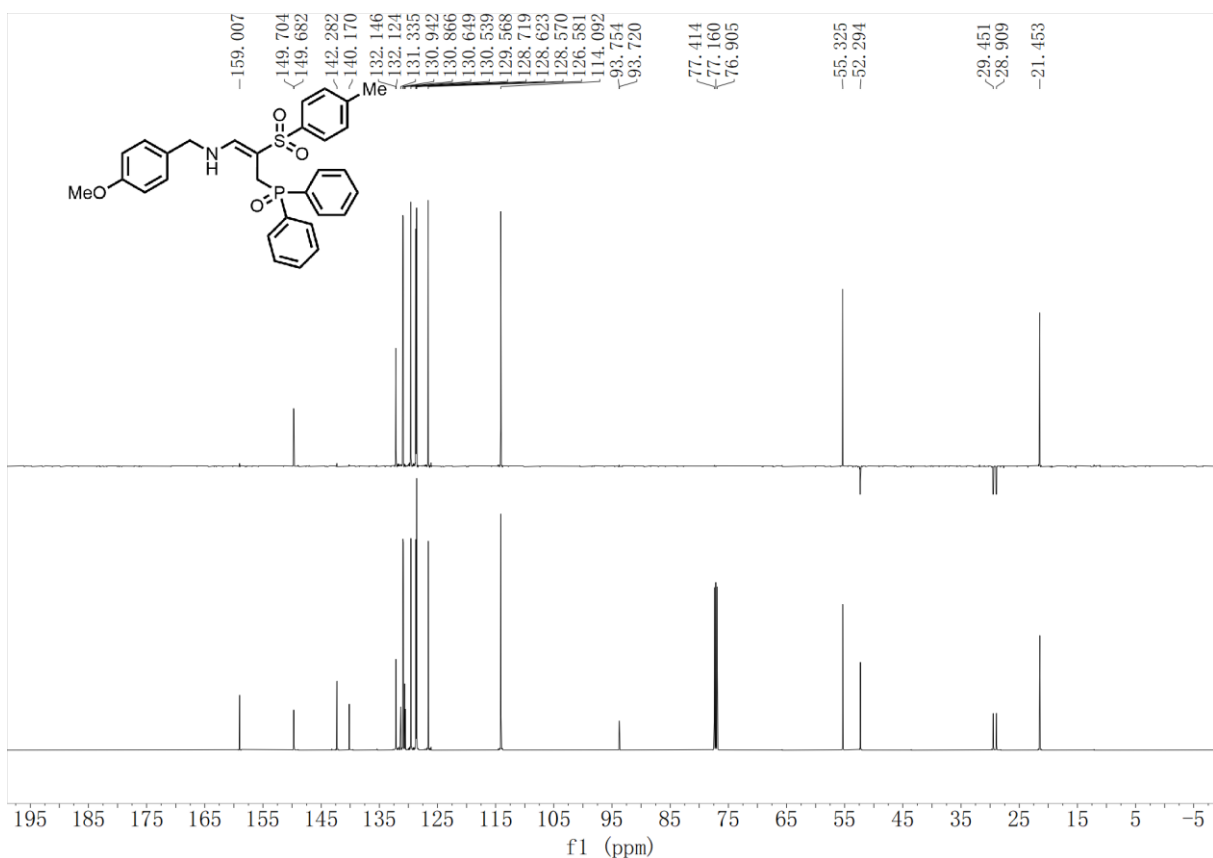

**8b** –  $^{31}\text{P}$  NMR (121 MHz,  $\text{CDCl}_3$ )

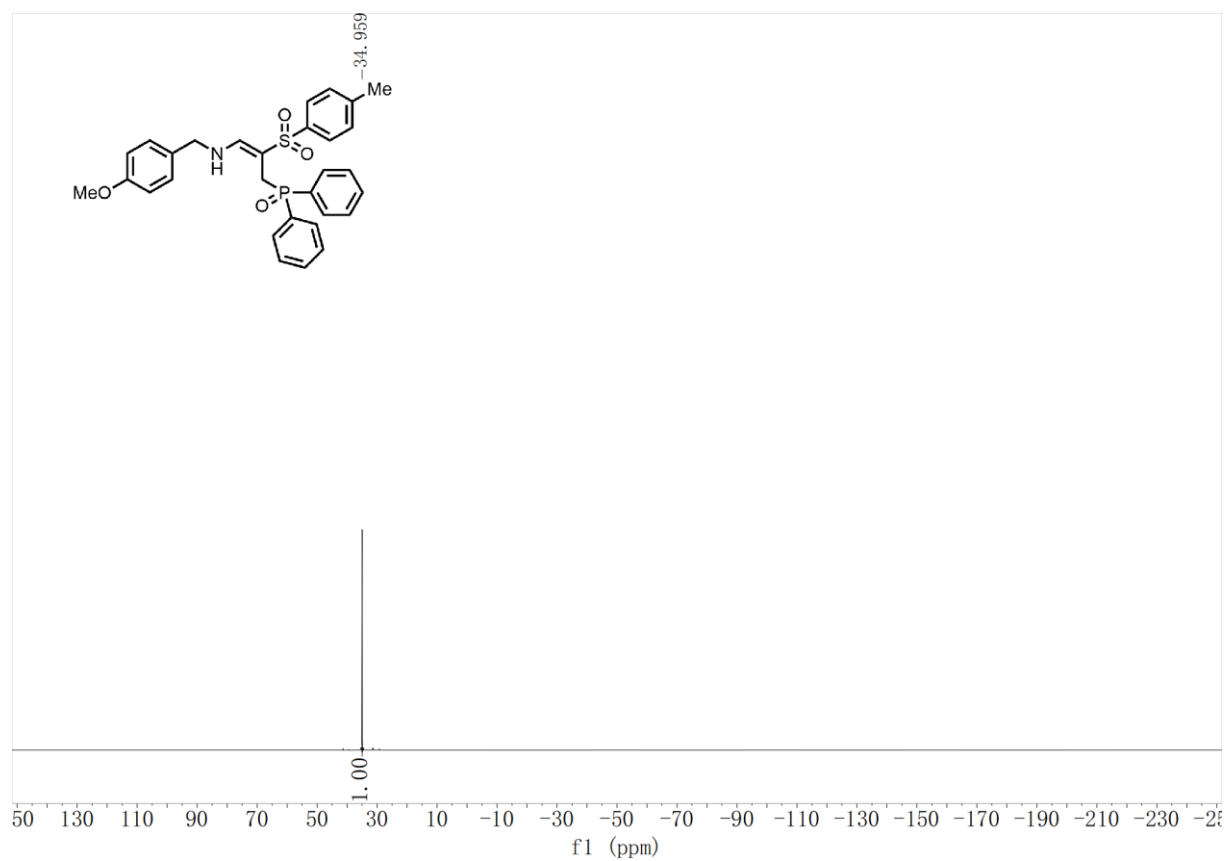

**8c** –  $^1\text{H}$  NMR (500 MHz,  $\text{CDCl}_3$ )

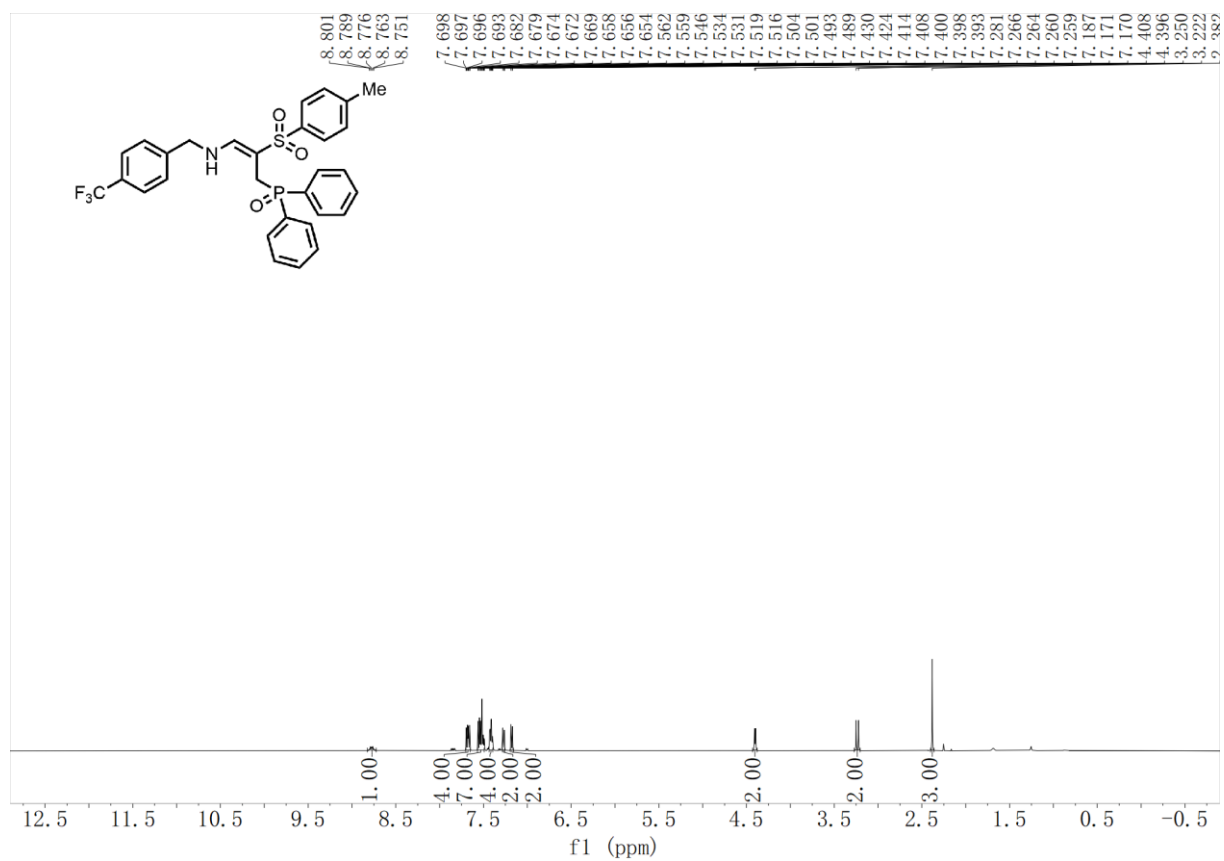

**8c** –  $^{13}\text{C}$  NMR (126 MHz,  $\text{CDCl}_3$ )

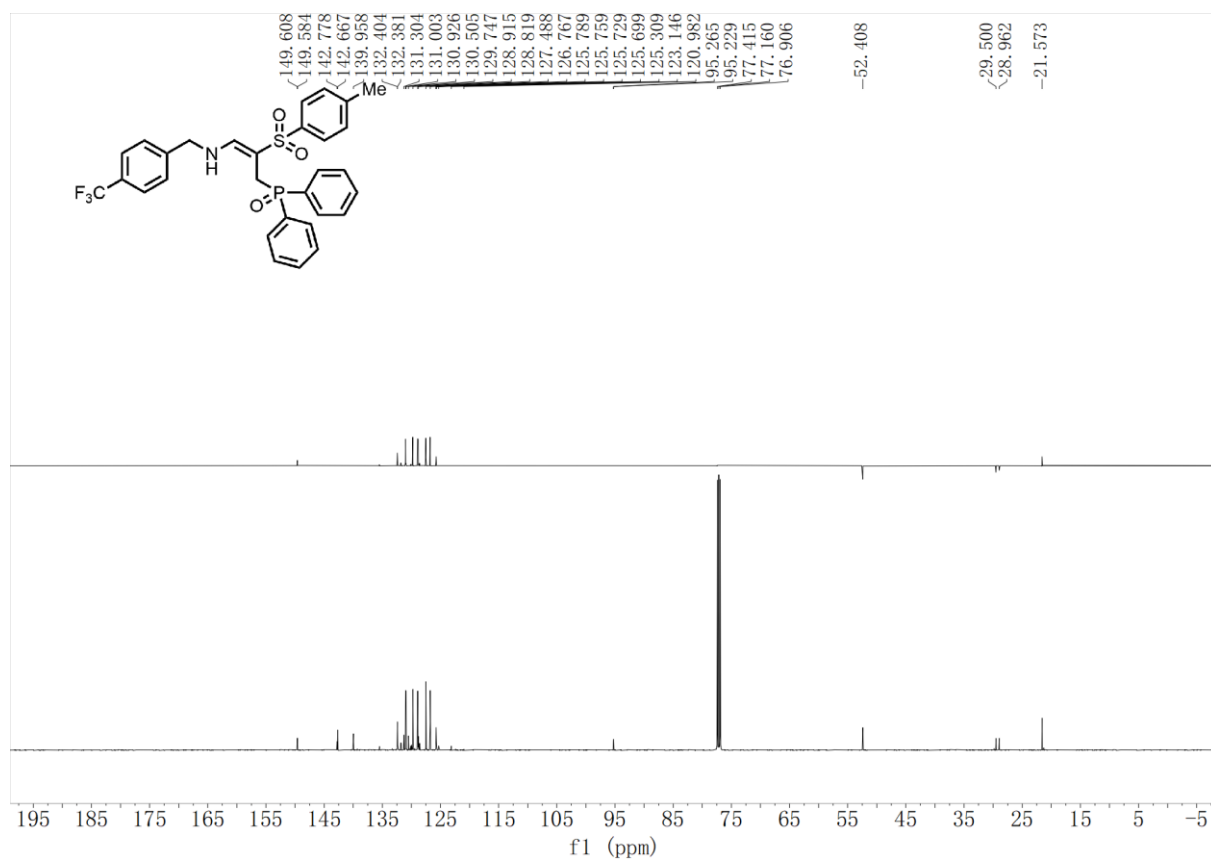

**8c** –  $^{19}\text{F}$  NMR (471 MHz,  $\text{CDCl}_3$ )

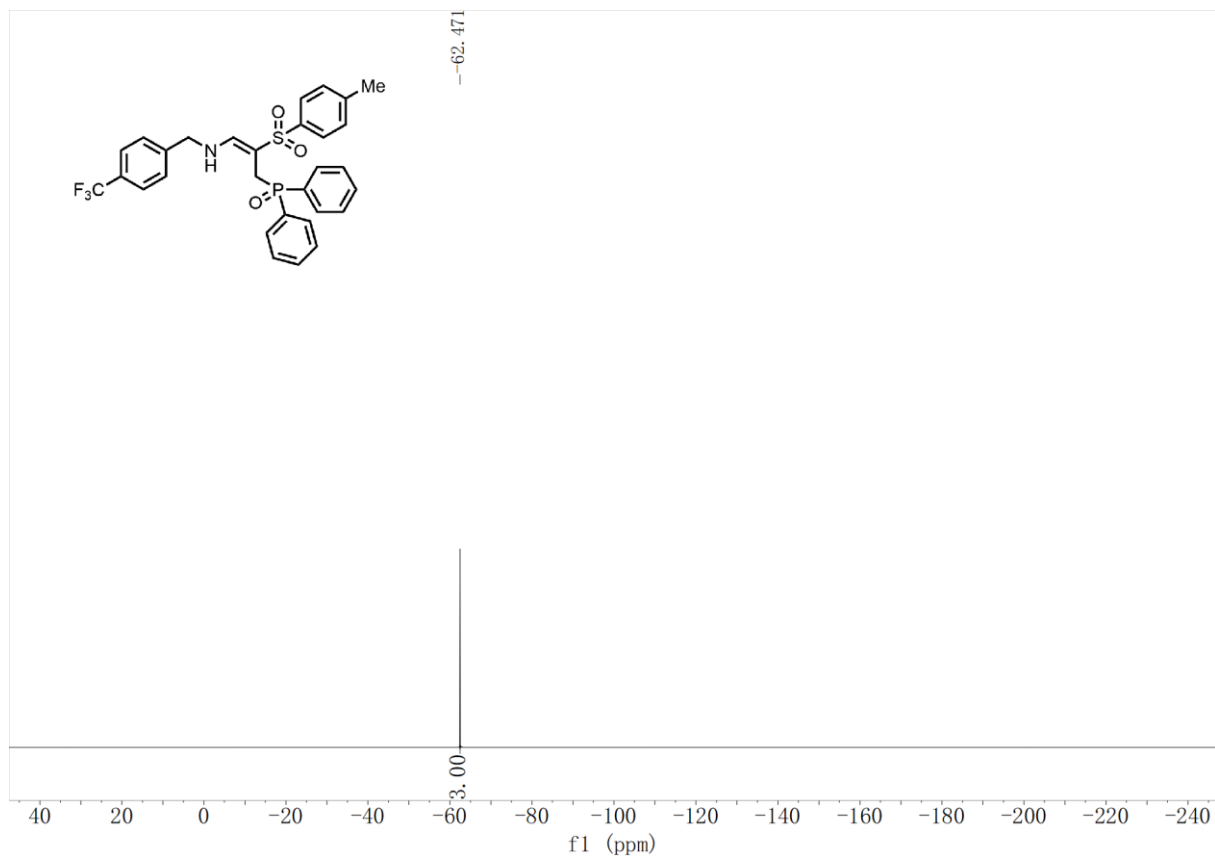

**8c** –  $^{31}\text{P}$  NMR (202 MHz,  $\text{CDCl}_3$ )

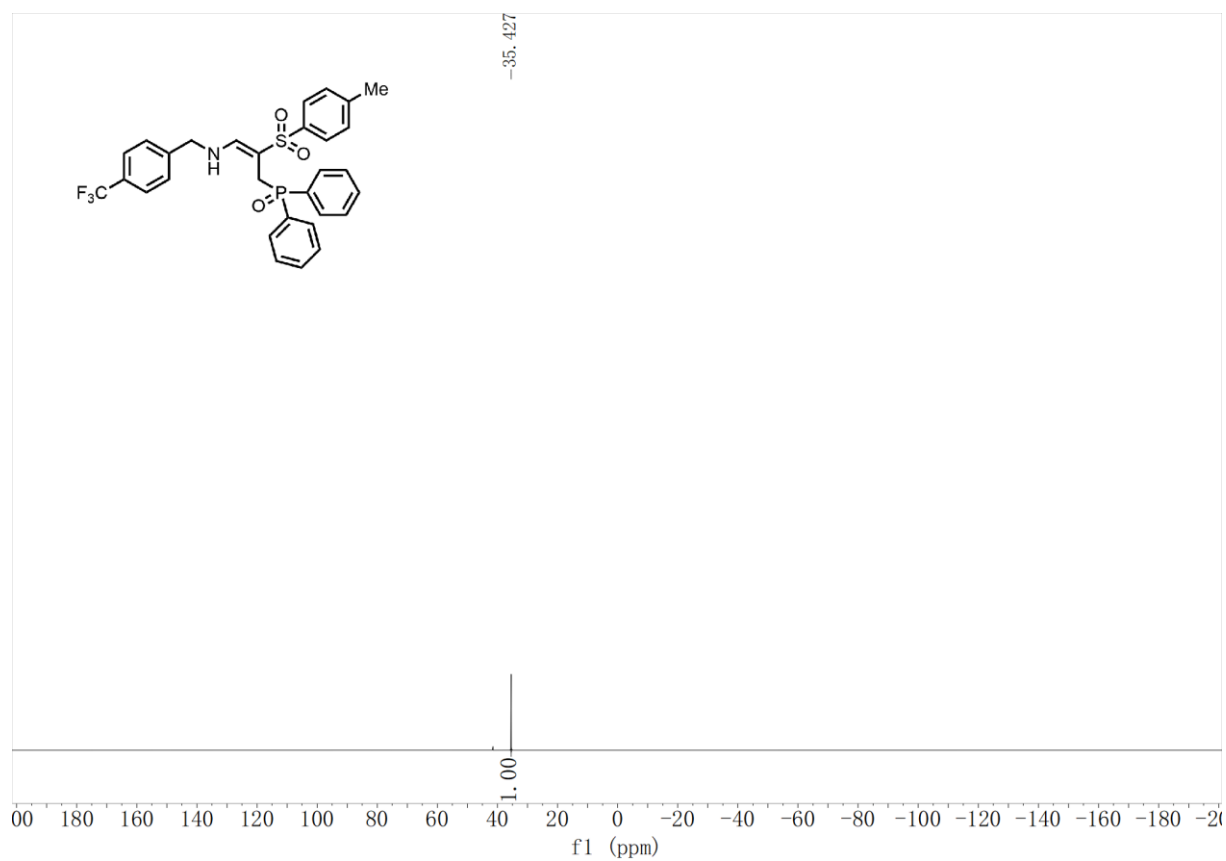



**8d** – <sup>1</sup>H NMR (500 MHz, CDCl<sub>3</sub>)

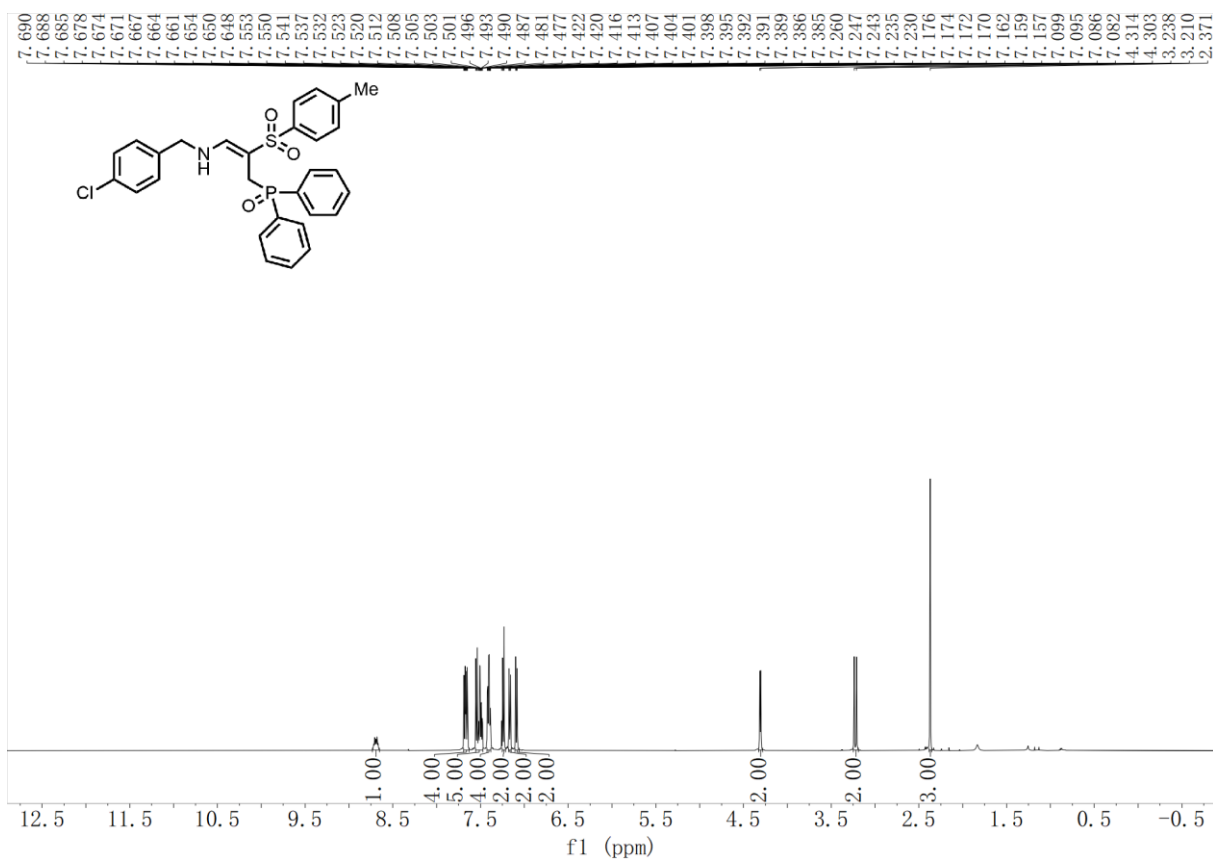

**8d** – <sup>13</sup>C NMR (126 MHz, CDCl<sub>3</sub>)

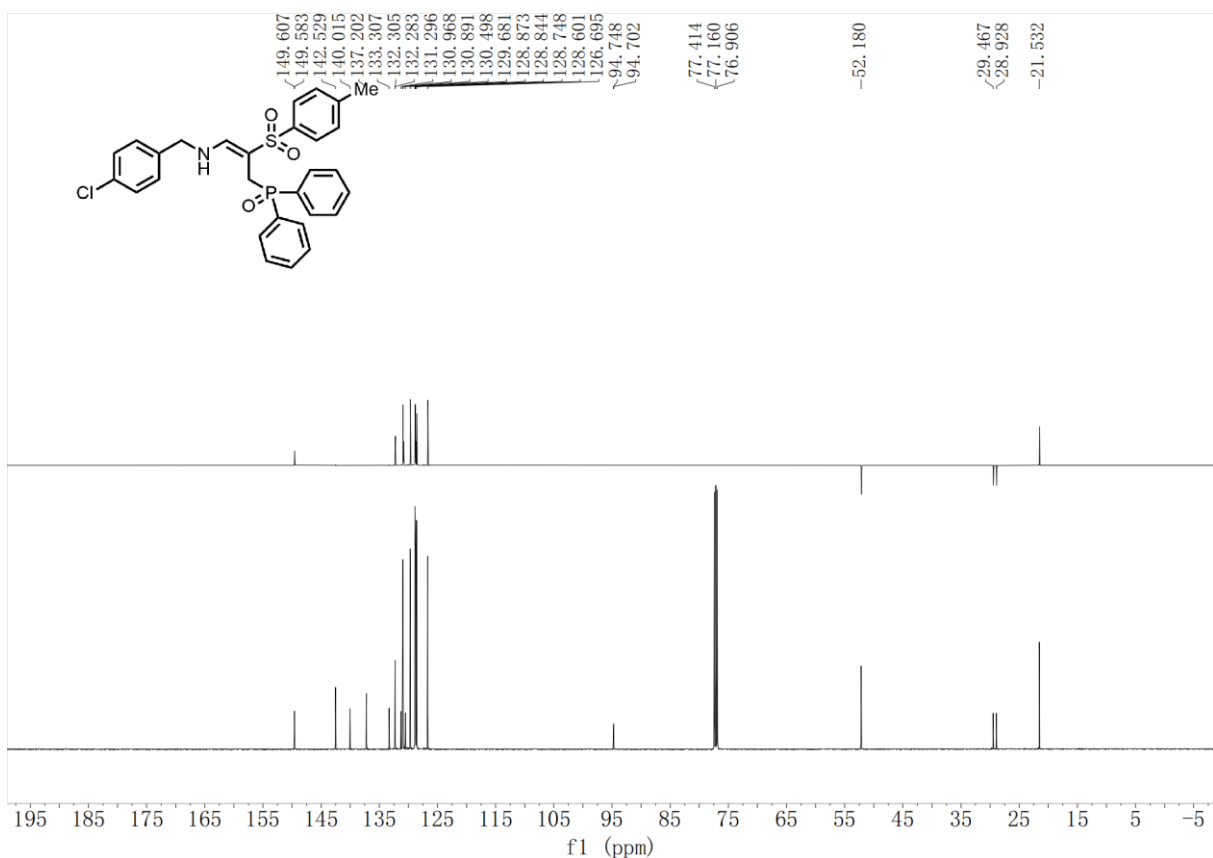

**8d** –  $^{31}\text{P}$  NMR (121 MHz,  $\text{CDCl}_3$ )

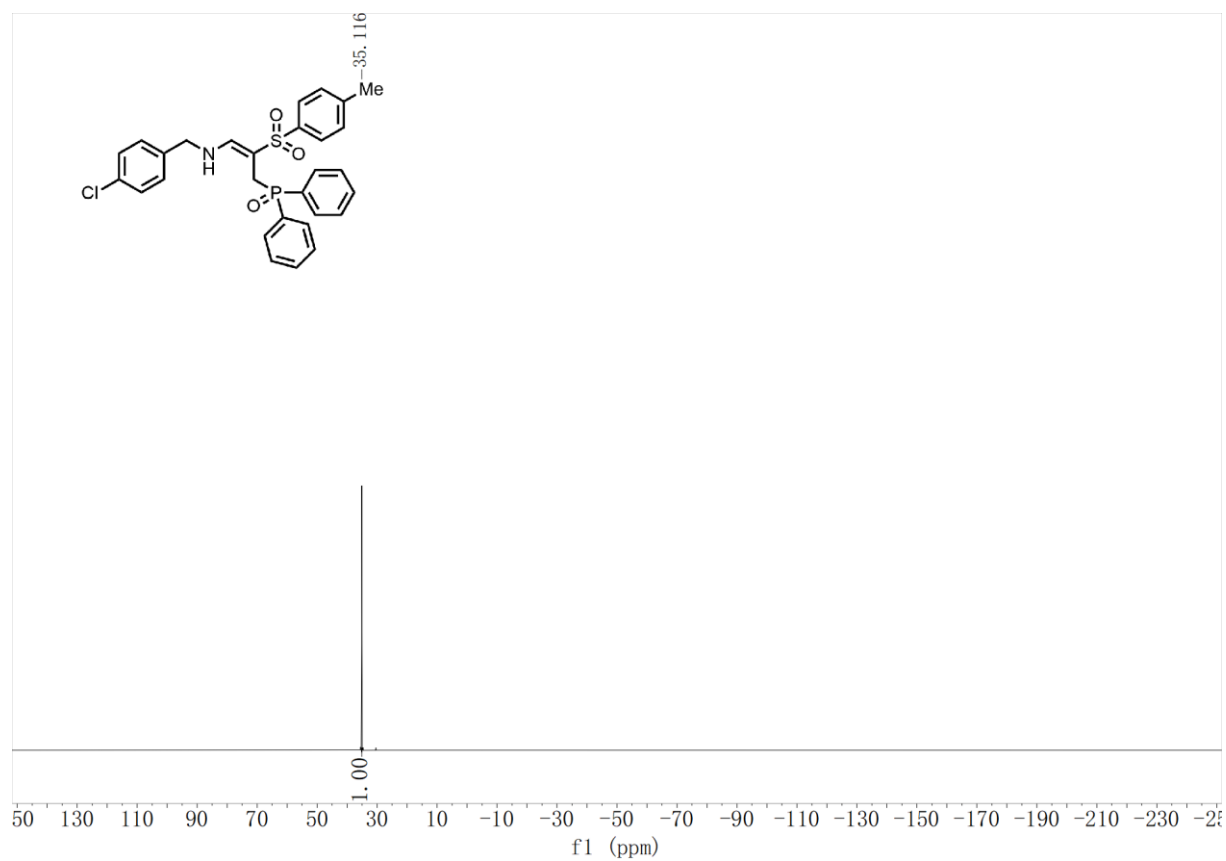

**8e** –  $^1\text{H}$  NMR (300 MHz,  $\text{CDCl}_3$ )

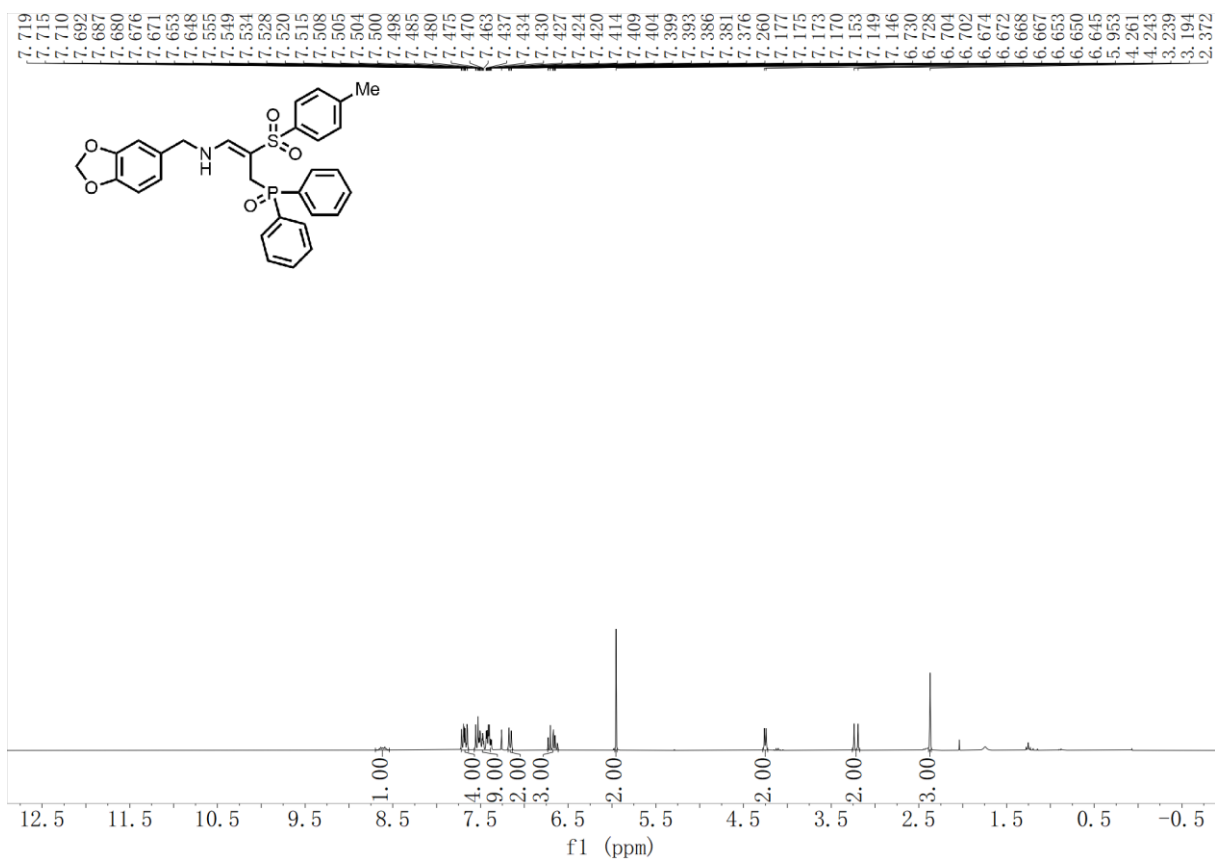

**8e** –  $^{13}\text{C}$  NMR (126 MHz,  $\text{CDCl}_3$ )

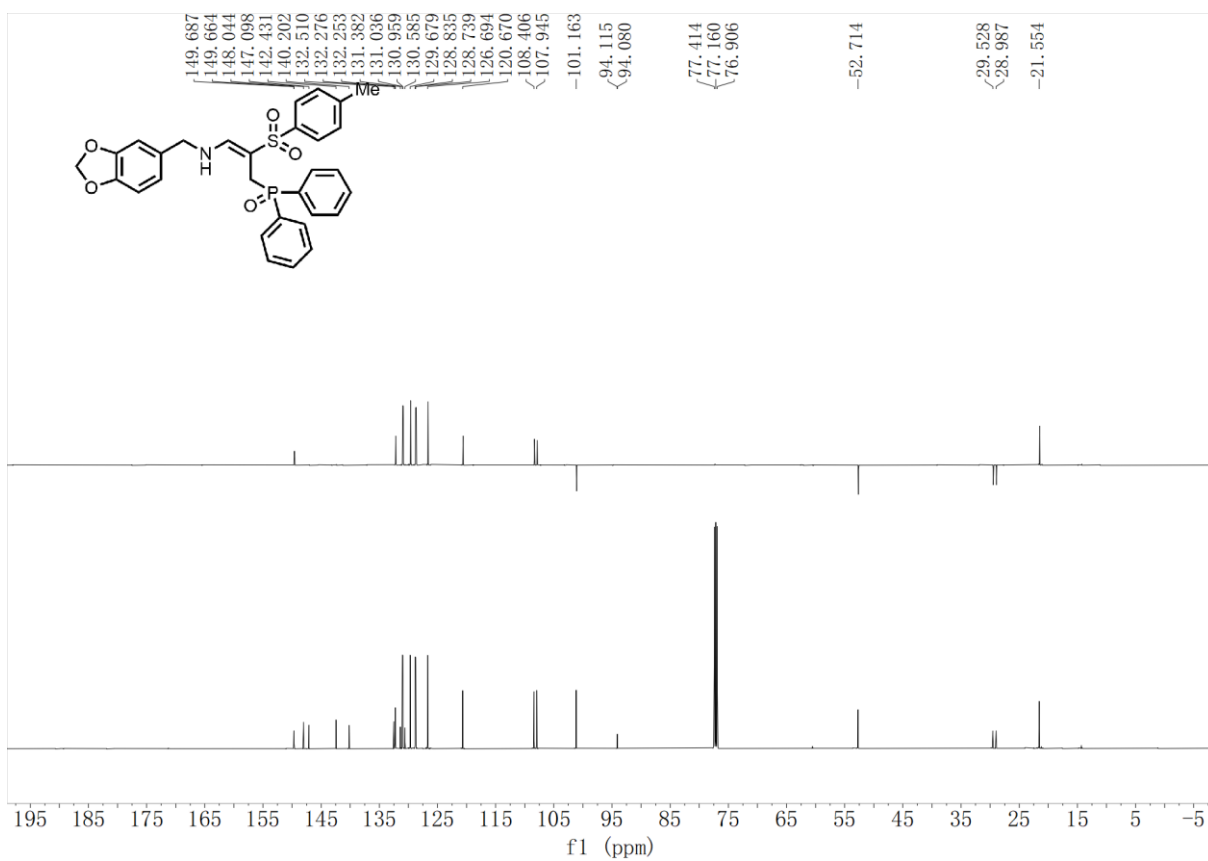

**8e** –  $^{31}\text{P}$  NMR (121 MHz,  $\text{CDCl}_3$ )

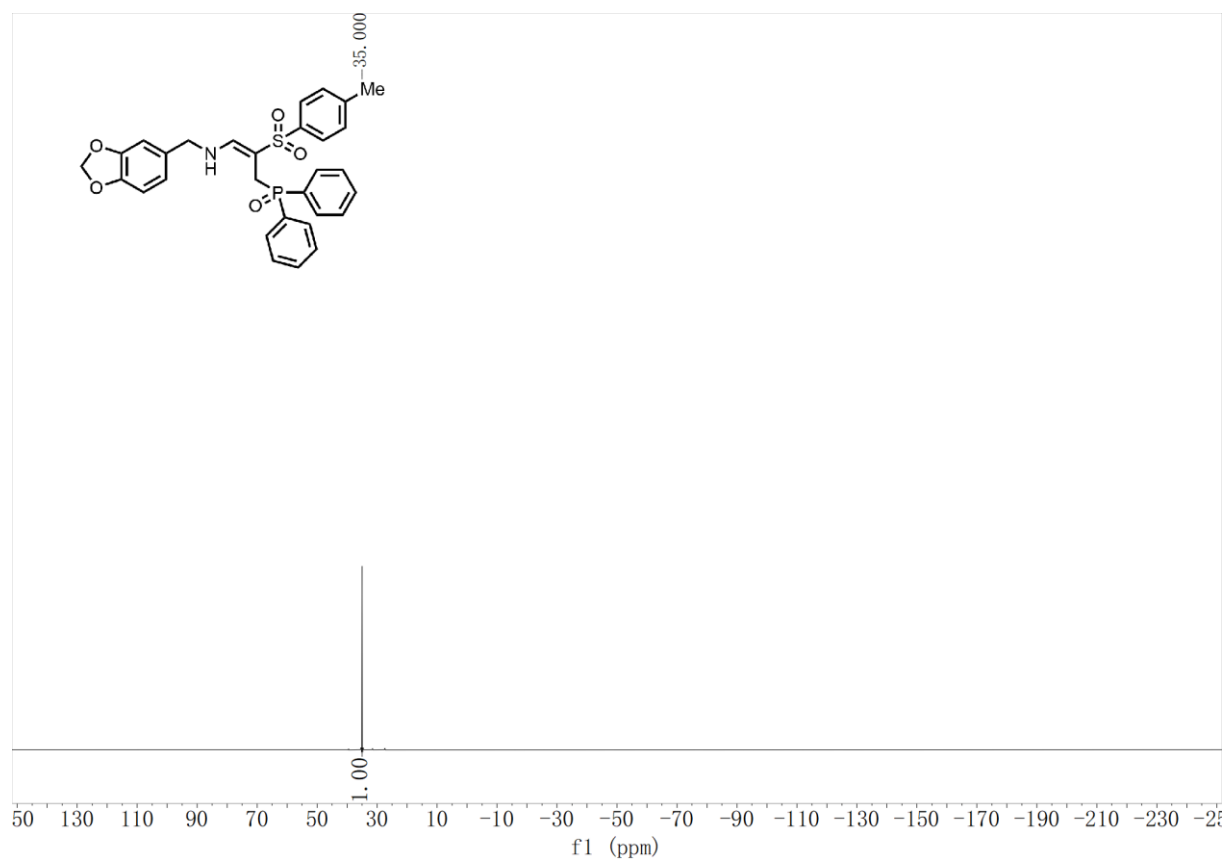

**8f** –  $^1\text{H}$  NMR (500 MHz,  $\text{CDCl}_3$ )

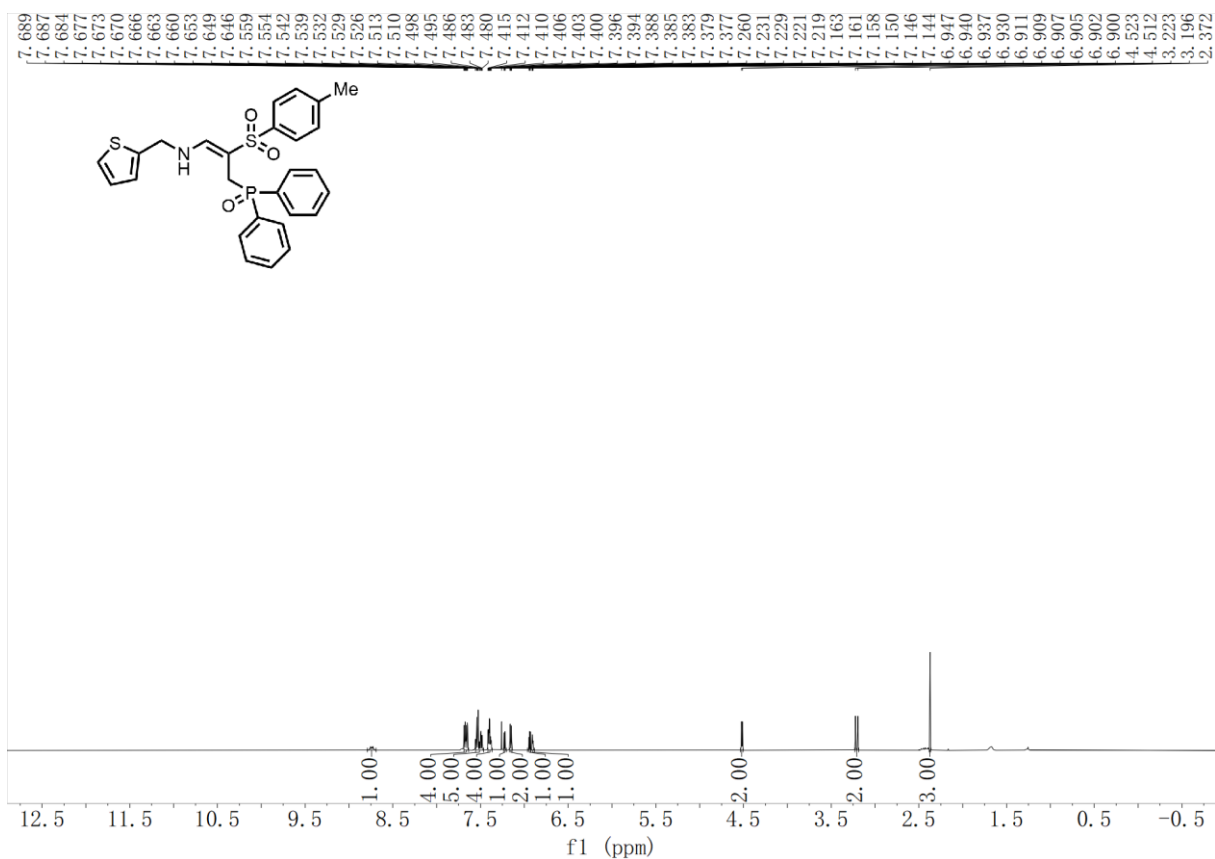

**8f** –  $^{13}\text{C}$  NMR (126 MHz,  $\text{CDCl}_3$ )

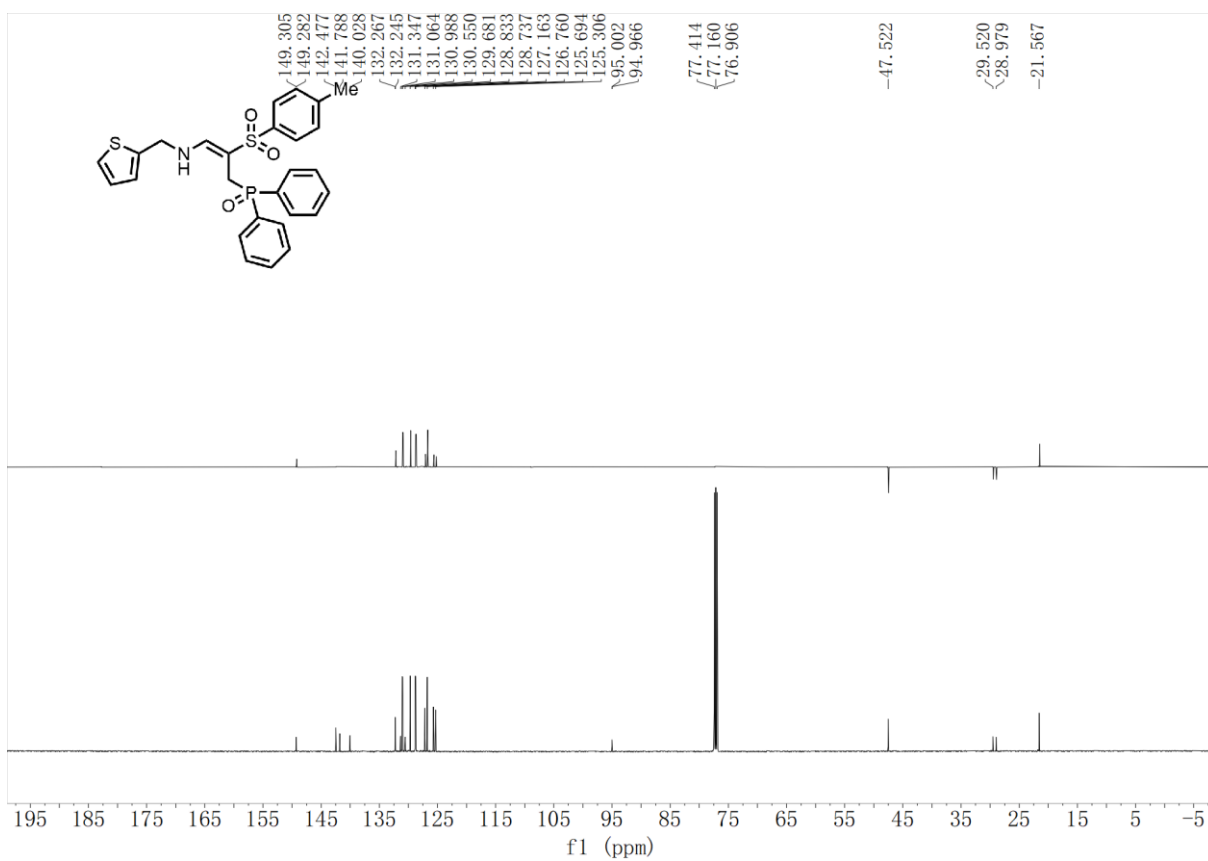

**8f** –  $^{31}\text{P}$  NMR (121 MHz,  $\text{CDCl}_3$ )

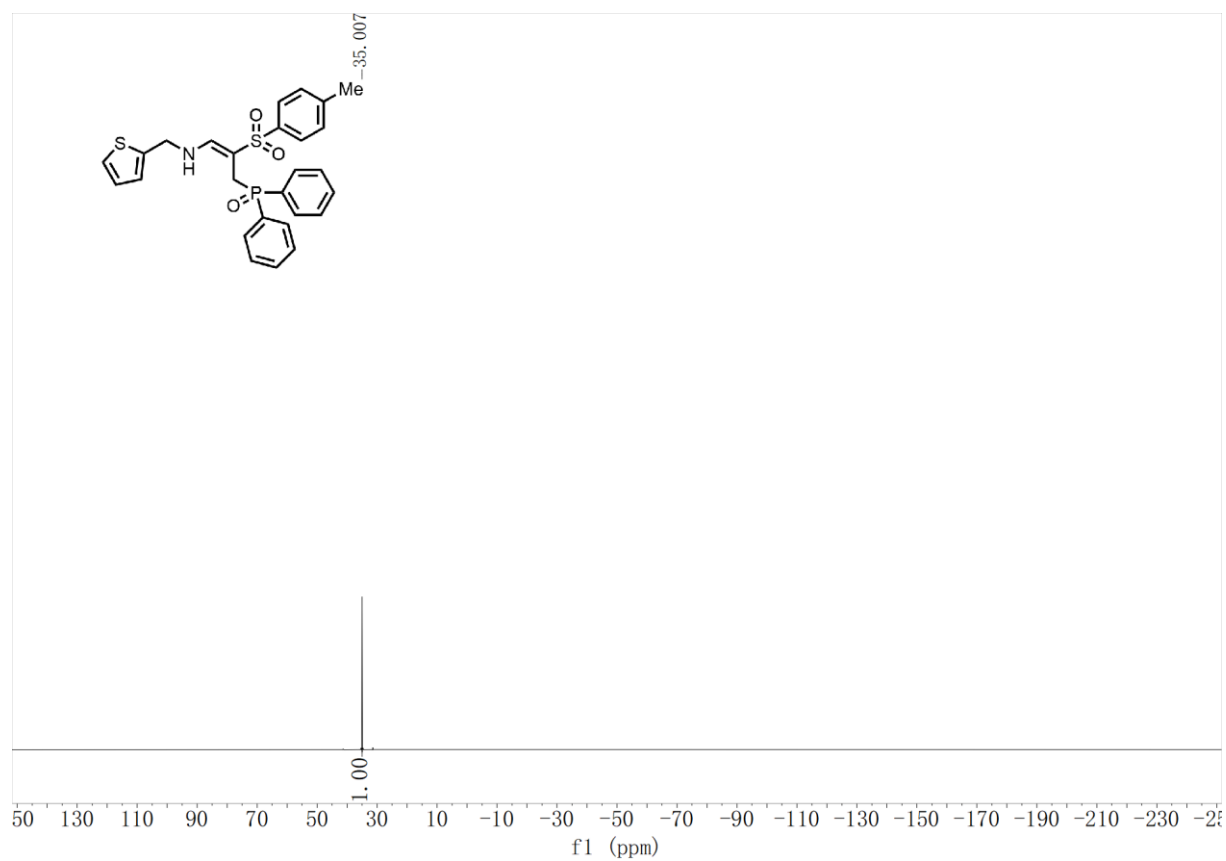

**8g** –  $^1\text{H}$  NMR (500 MHz,  $\text{CDCl}_3$ )

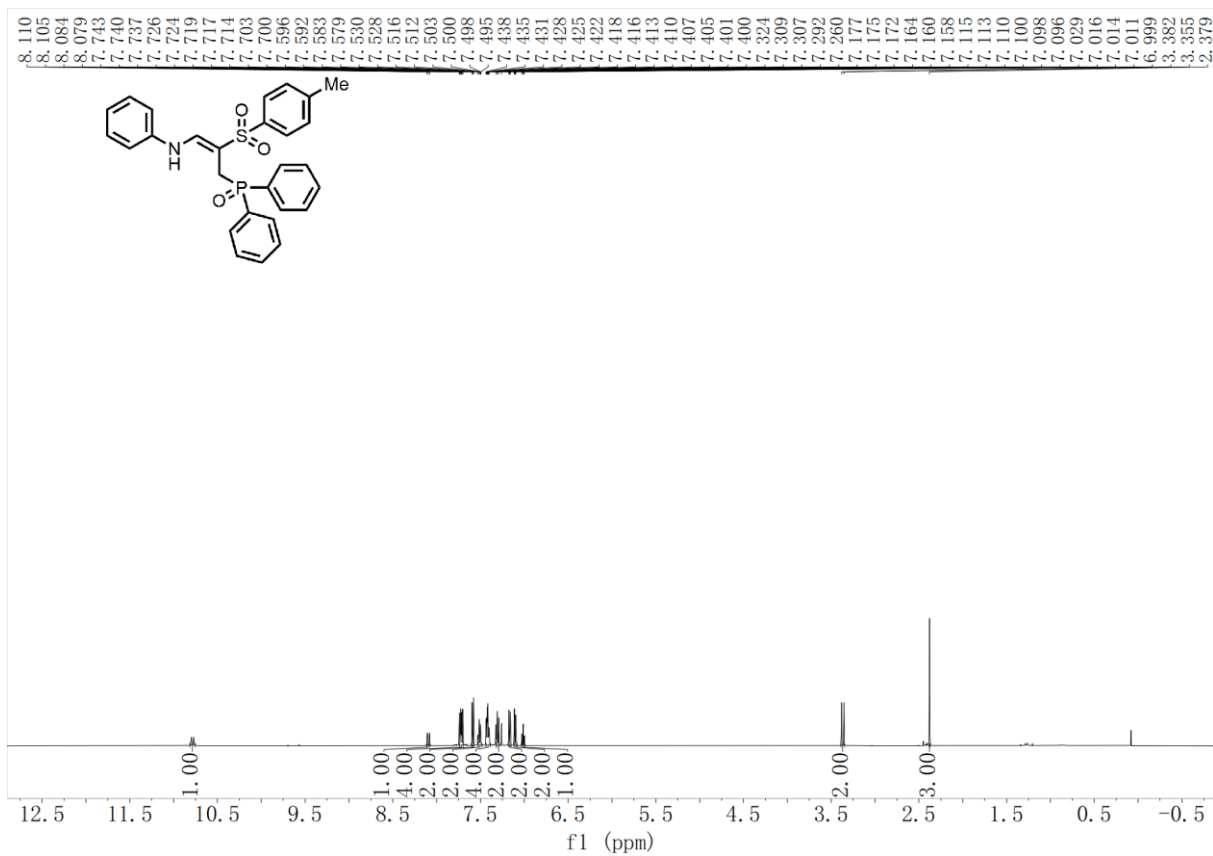

**8g** –  $^{13}\text{C}$  NMR (126 MHz,  $\text{CDCl}_3$ )

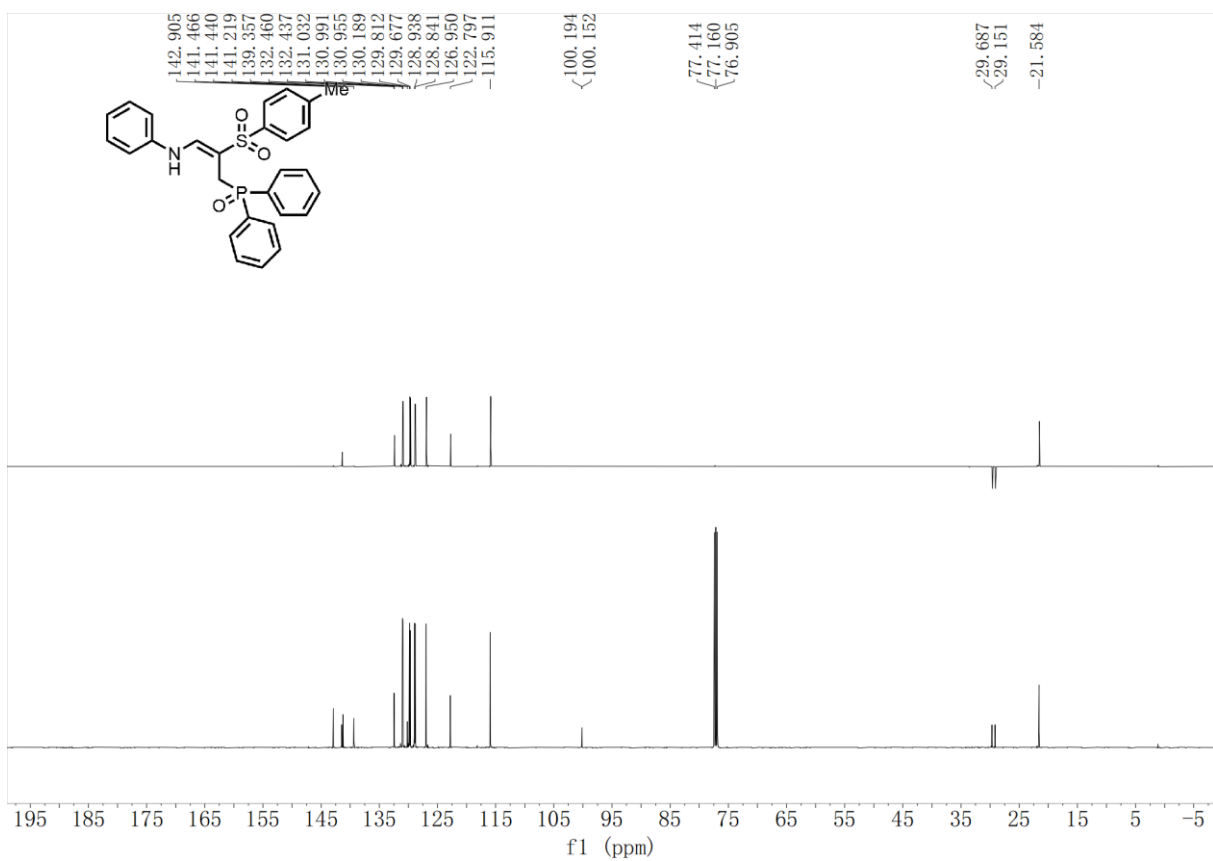

**8g** –  $^{31}\text{P}$  NMR (202 MHz,  $\text{CDCl}_3$ )

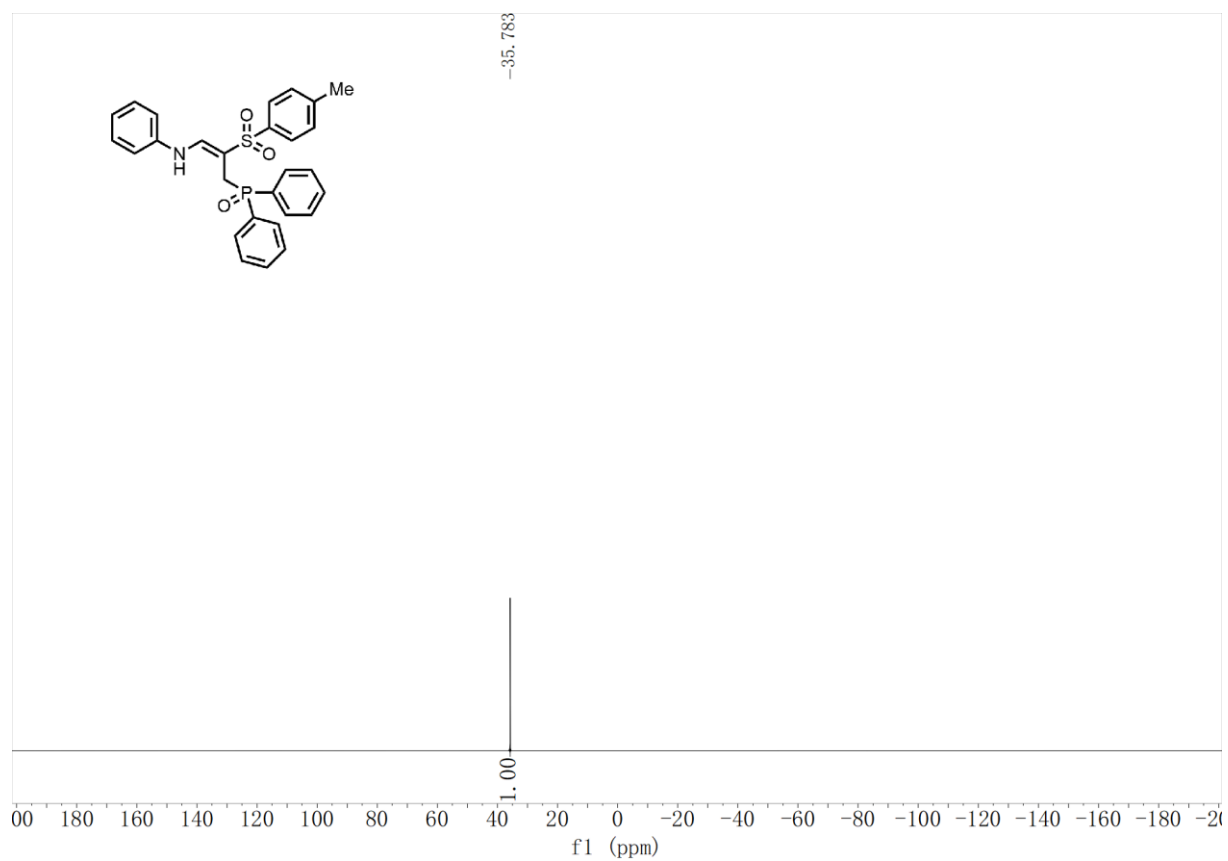



**8h** – <sup>1</sup>H NMR (500 MHz, CDCl<sub>3</sub>)

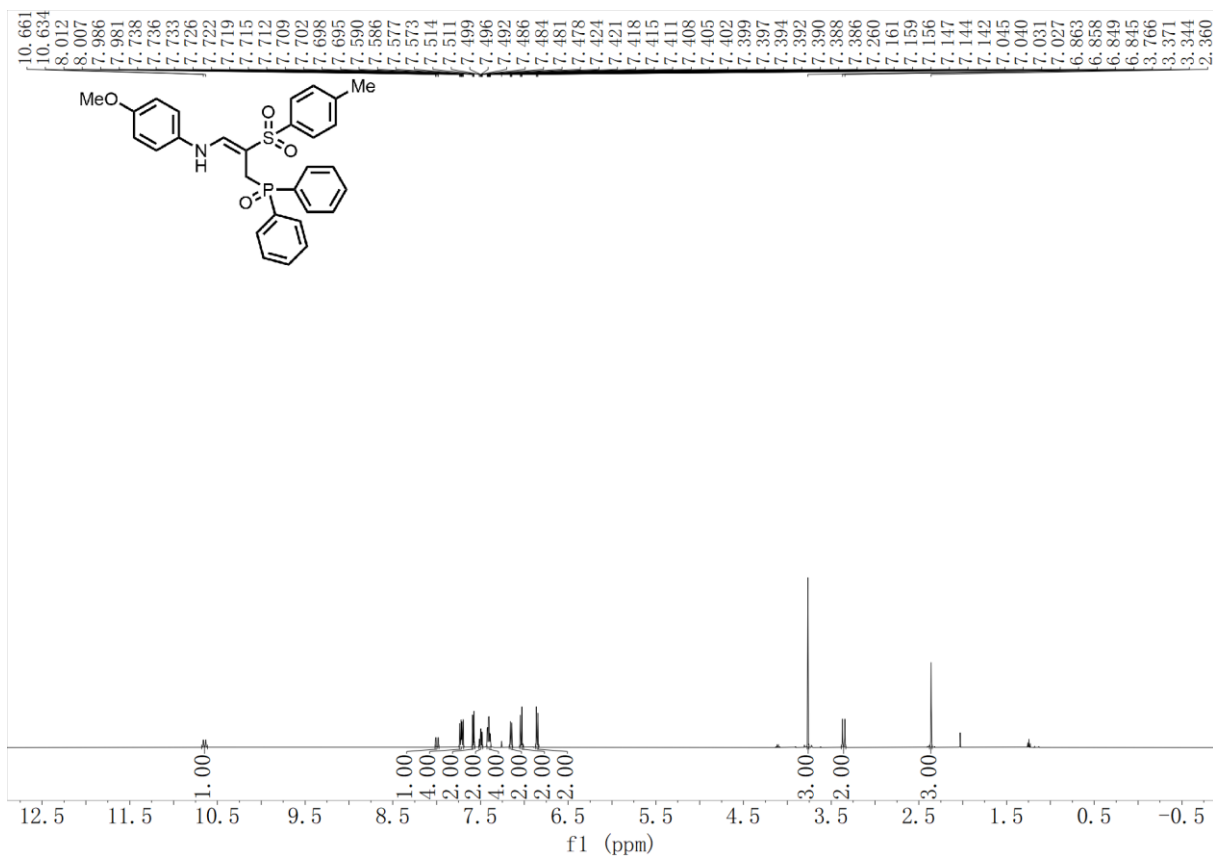

**8h** – <sup>13</sup>C NMR (126 MHz, CDCl<sub>3</sub>)

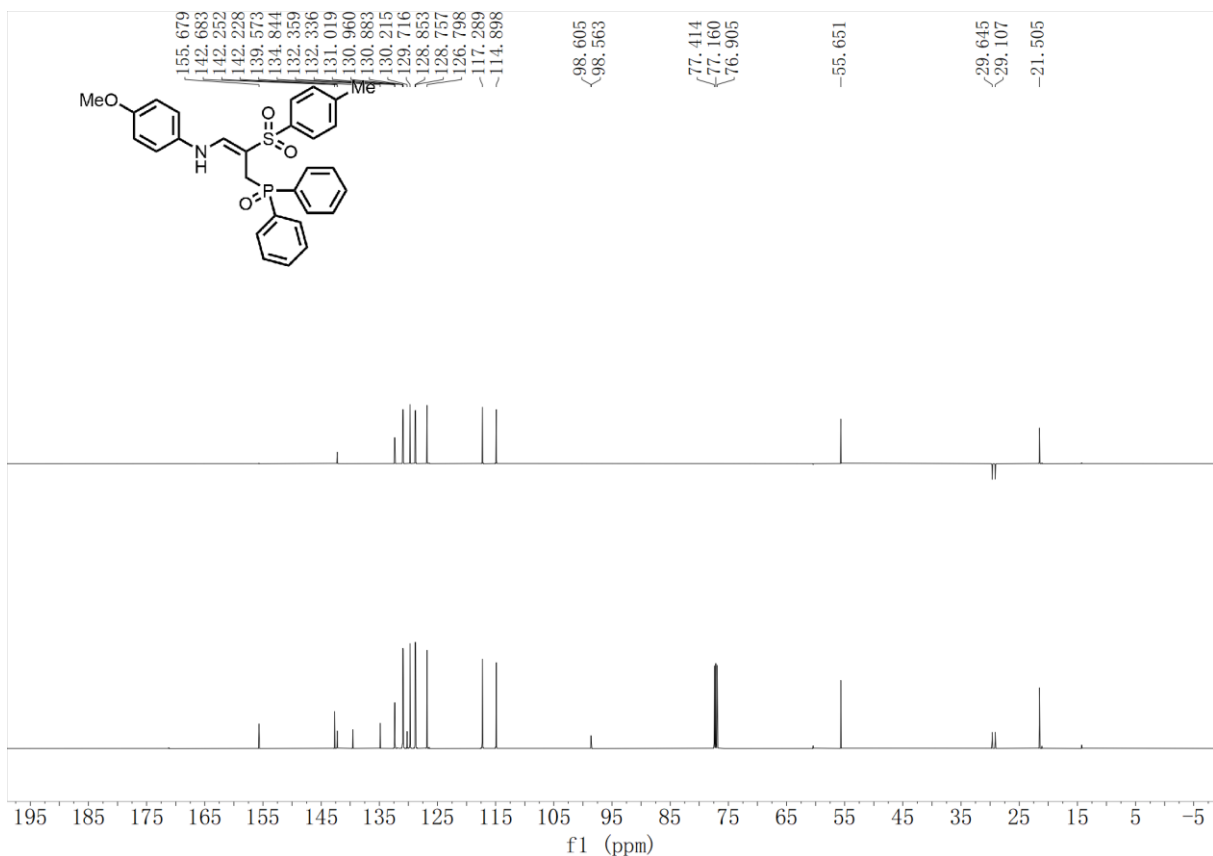

**8h** –  $^{31}\text{P}$  NMR (121 MHz,  $\text{CDCl}_3$ )

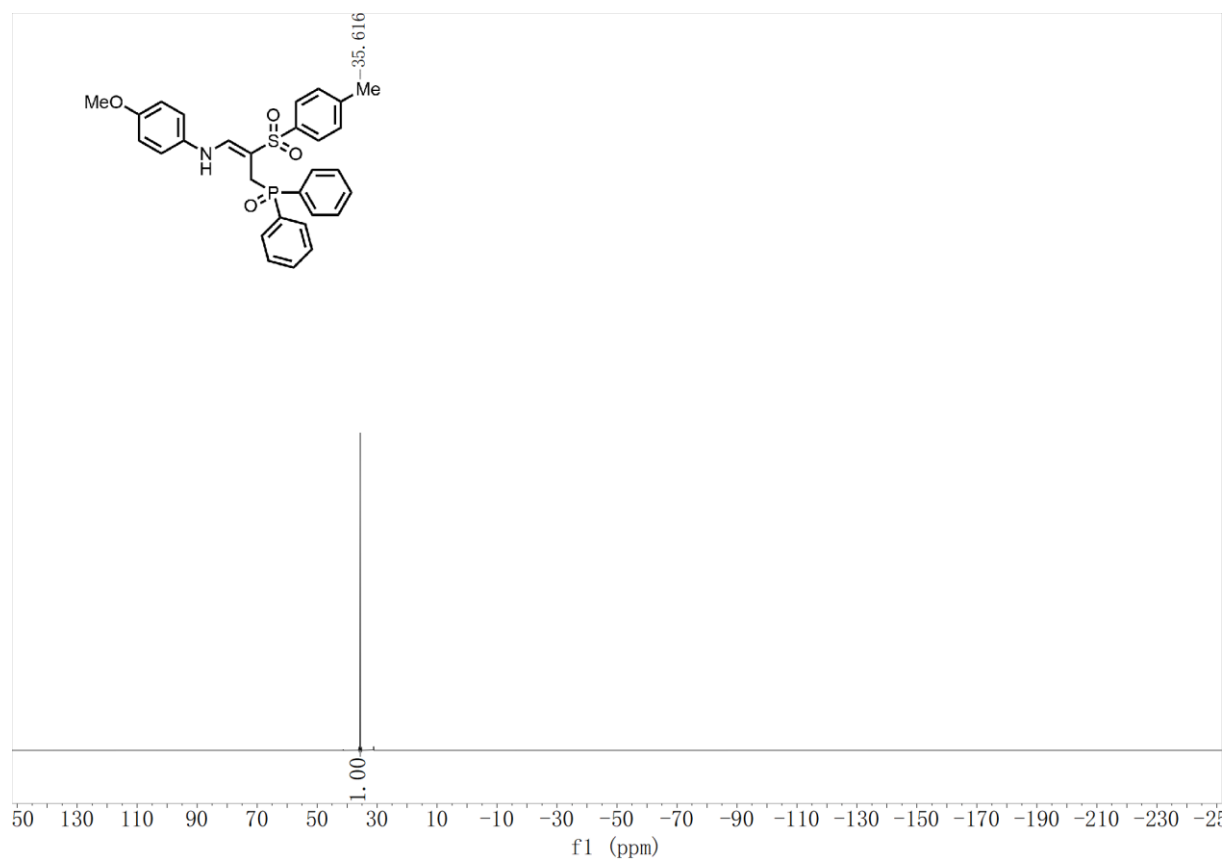

**8i** – <sup>1</sup>H NMR (500 MHz, CDCl<sub>3</sub>)

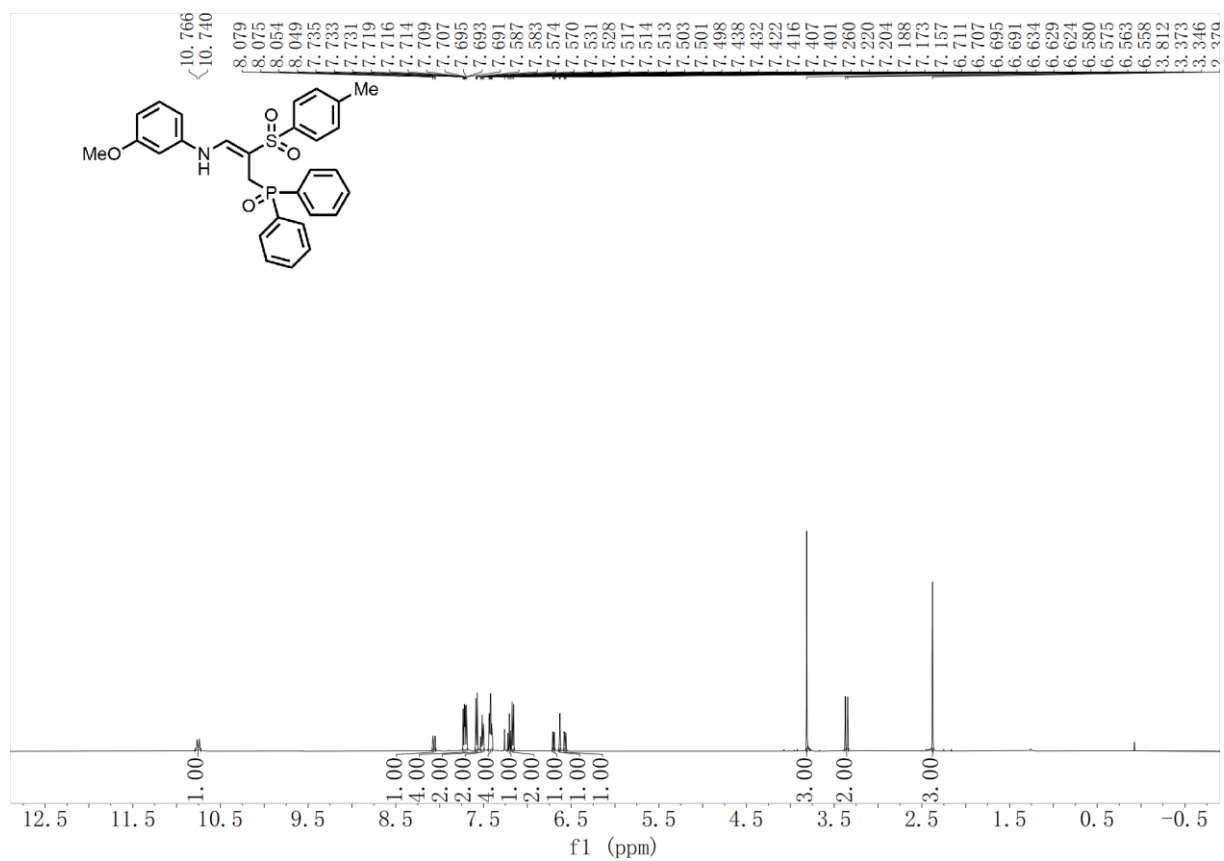

**8i** – <sup>13</sup>C NMR (126 MHz, CDCl<sub>3</sub>)

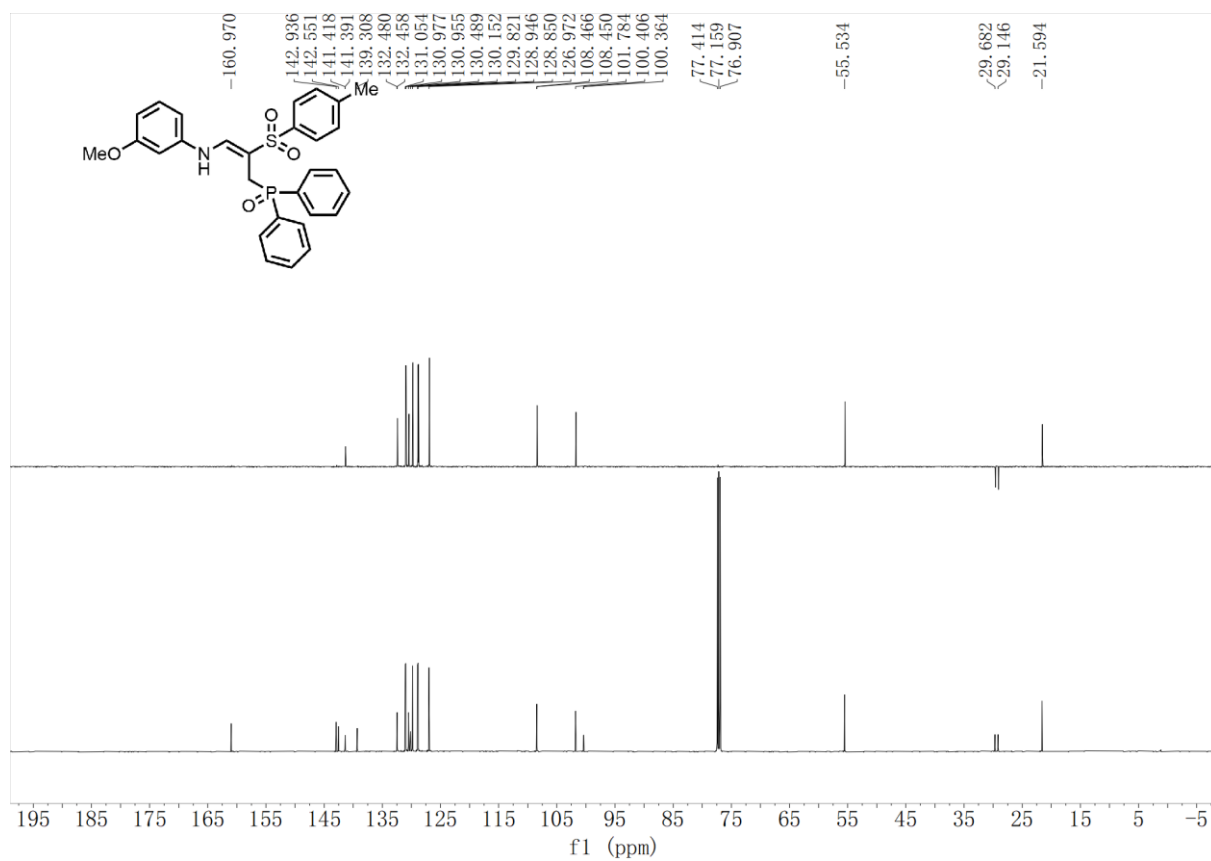

8i –  $^{31}\text{P}$  NMR (202 MHz,  $\text{CDCl}_3$ )

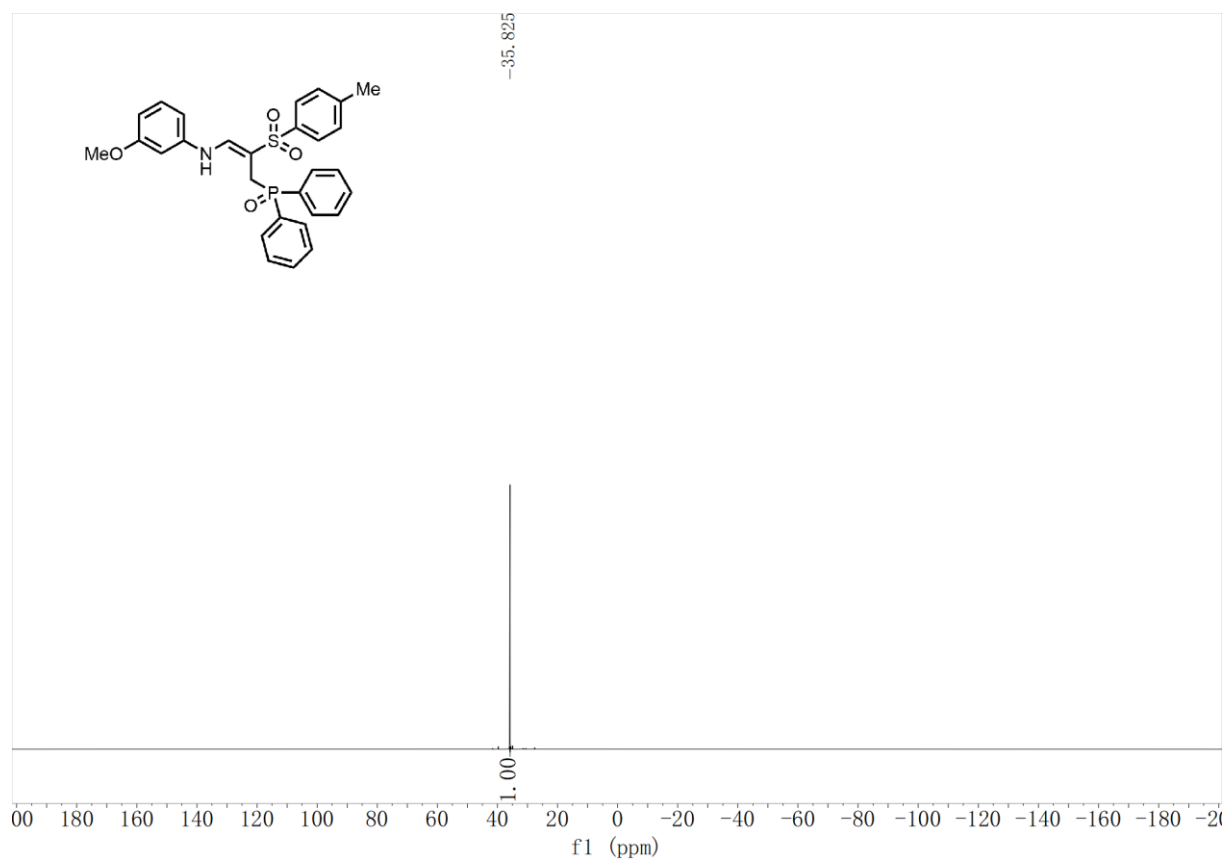

**8j** – <sup>1</sup>H NMR (500 MHz, CDCl<sub>3</sub>)

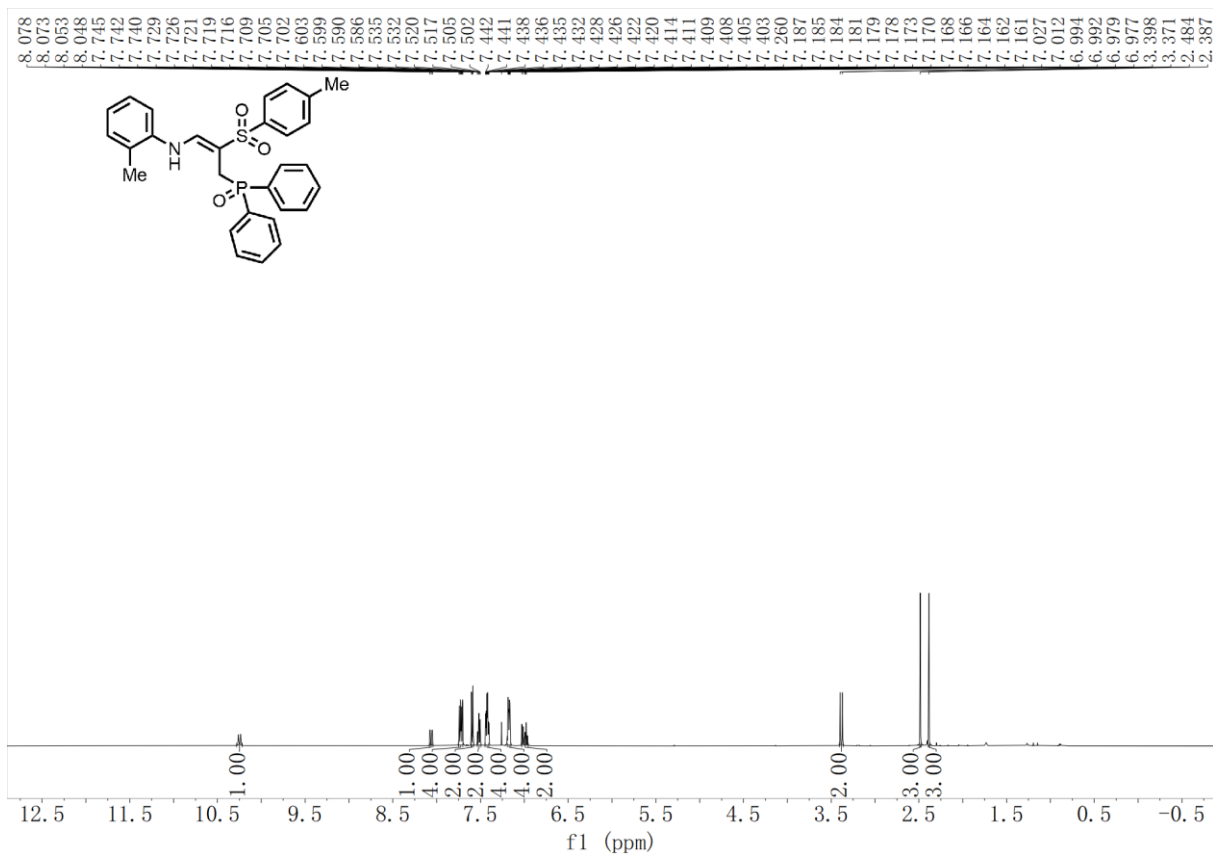

**8j** – <sup>13</sup>C NMR (126 MHz, CDCl<sub>3</sub>)

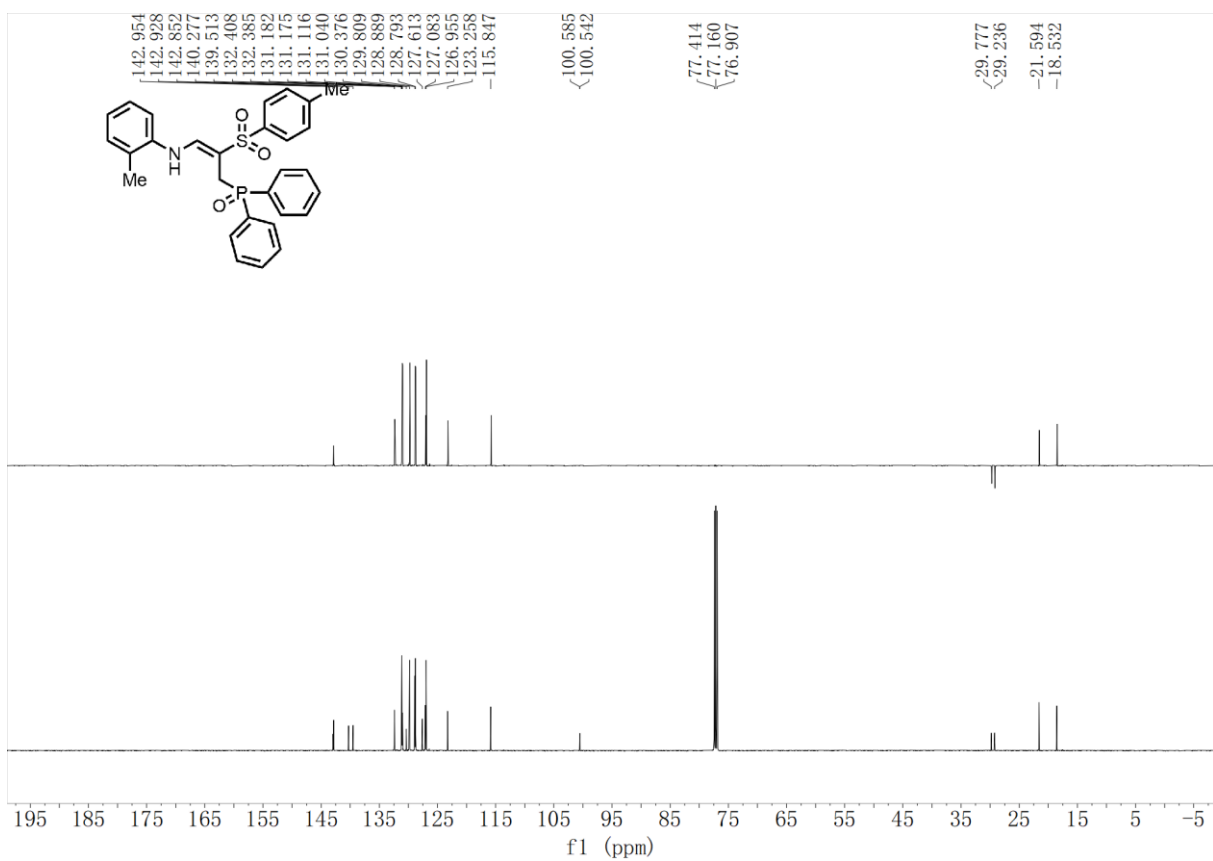

8j –  $^{31}\text{P}$  NMR (202 MHz,  $\text{CDCl}_3$ )

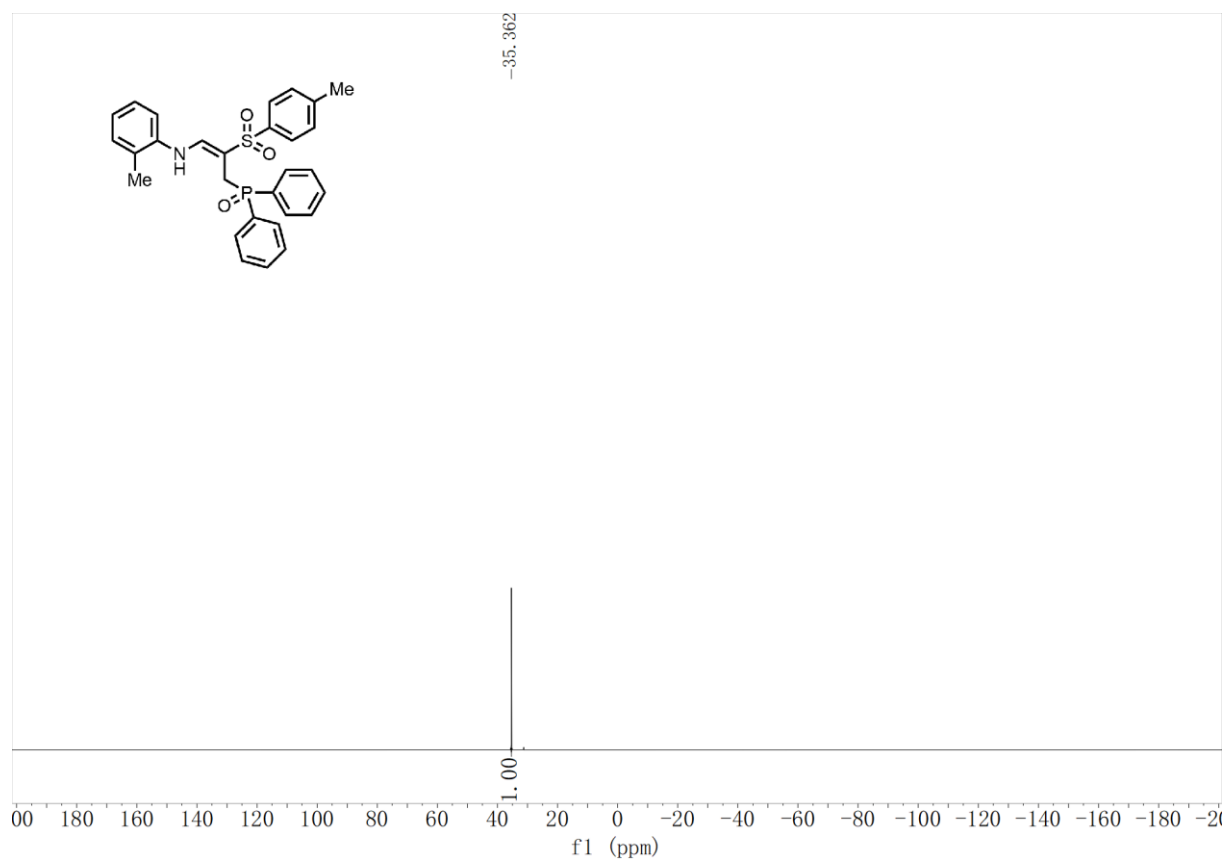

**8k** – <sup>1</sup>H NMR (500 MHz, CDCl<sub>3</sub>)

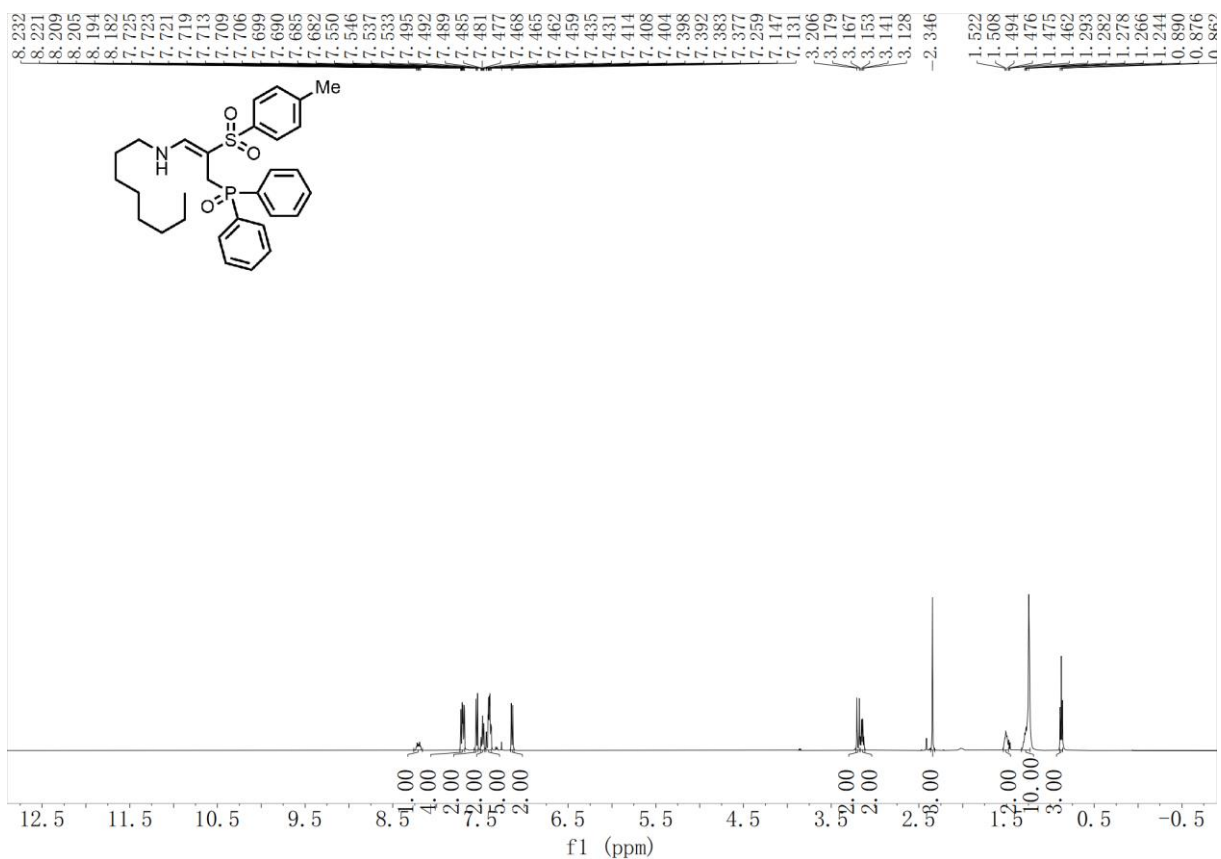

**8k** – <sup>13</sup>C NMR (126 MHz, CDCl<sub>3</sub>)

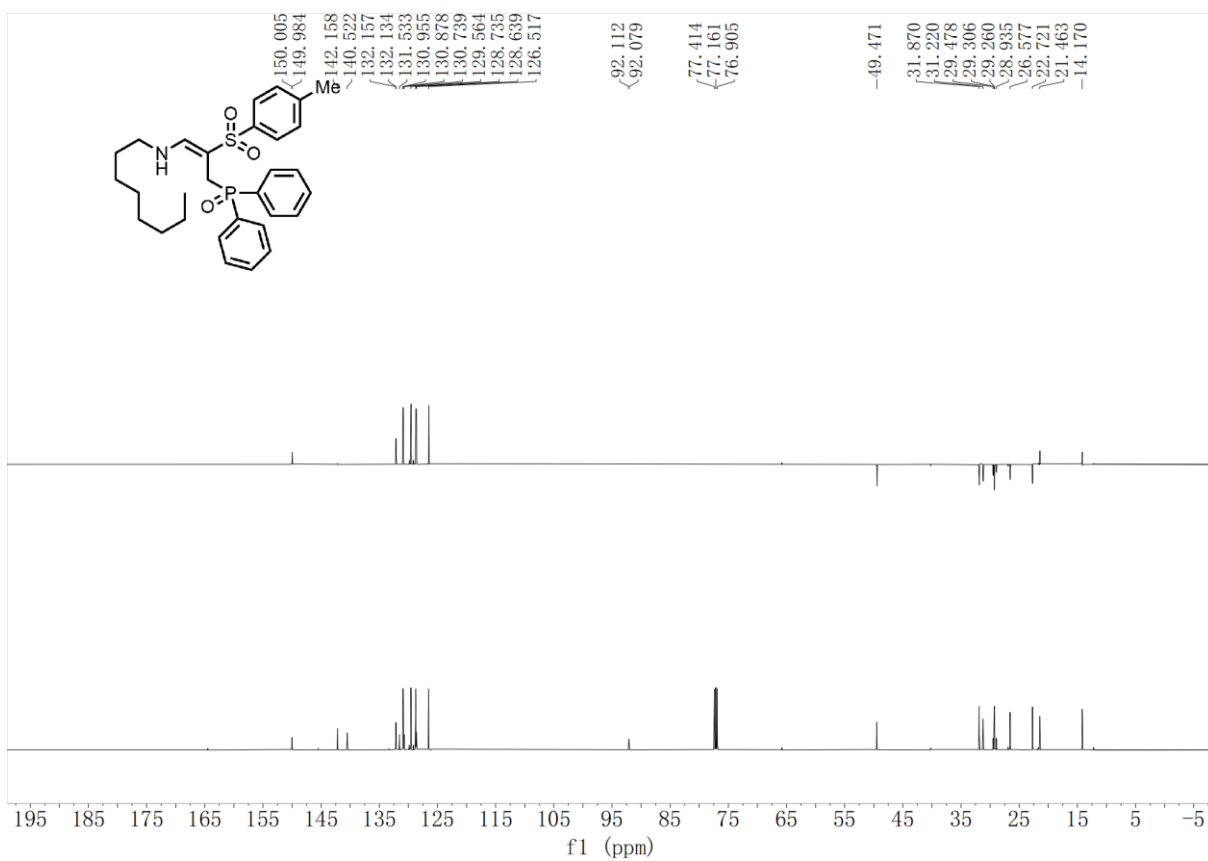

**8k** –  $^{31}\text{P}$  NMR (202 MHz,  $\text{CDCl}_3$ )

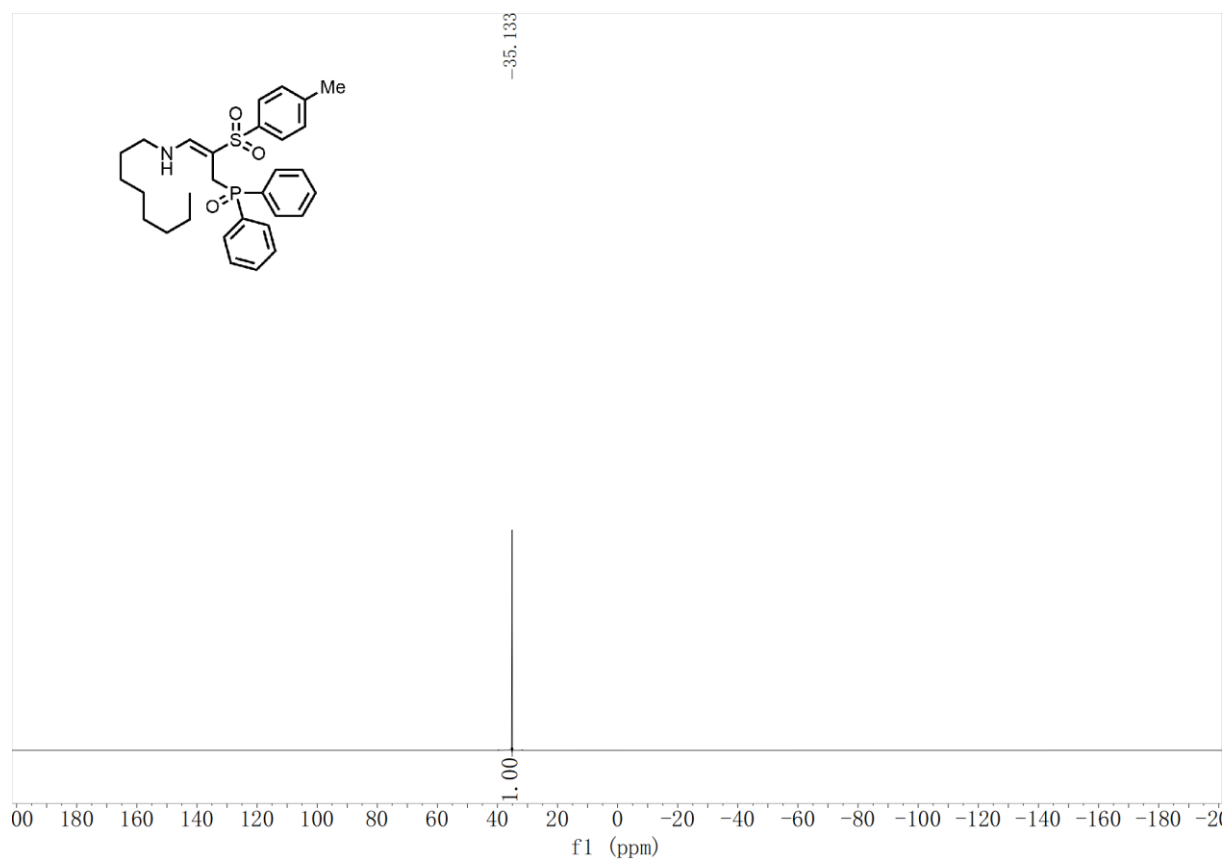



**8I** – <sup>1</sup>H NMR (500 MHz, CDCl<sub>3</sub>)

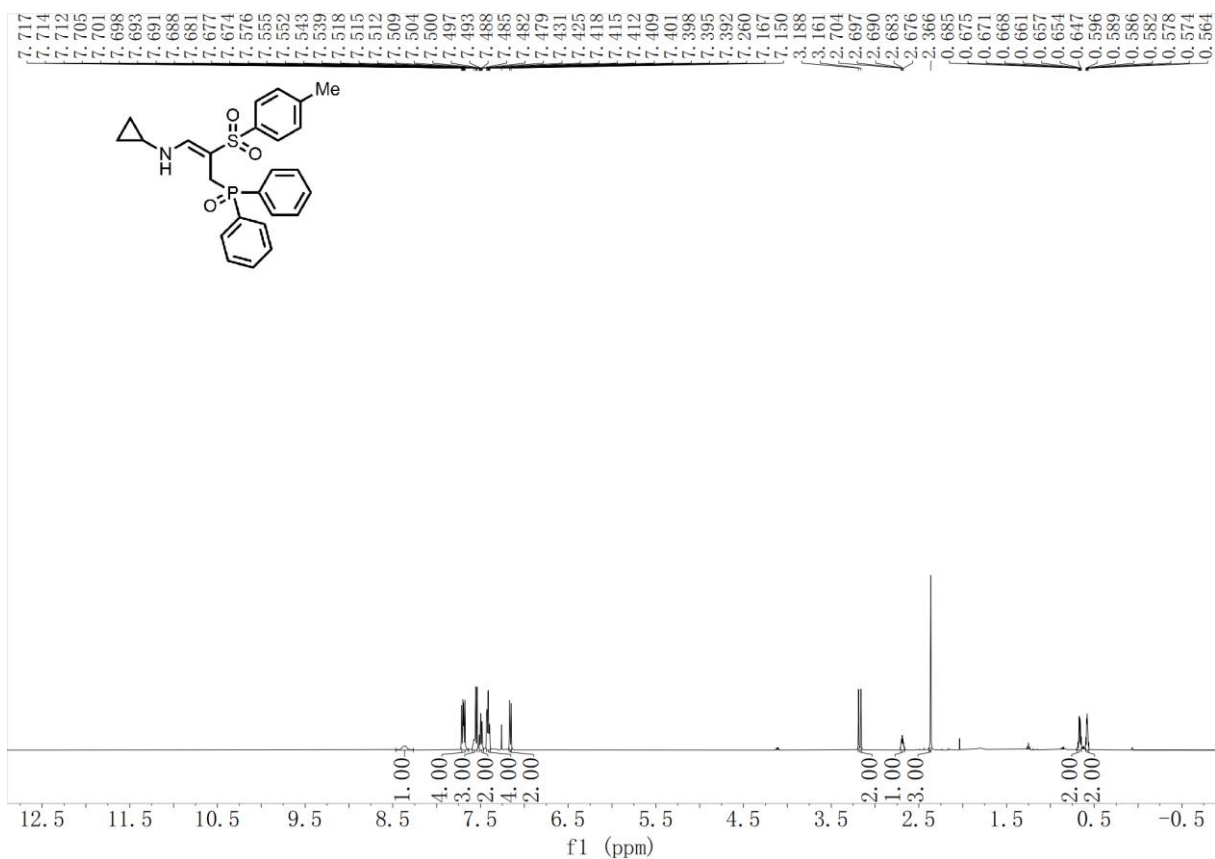

**8I** – <sup>13</sup>C NMR (126 MHz, CDCl<sub>3</sub>)

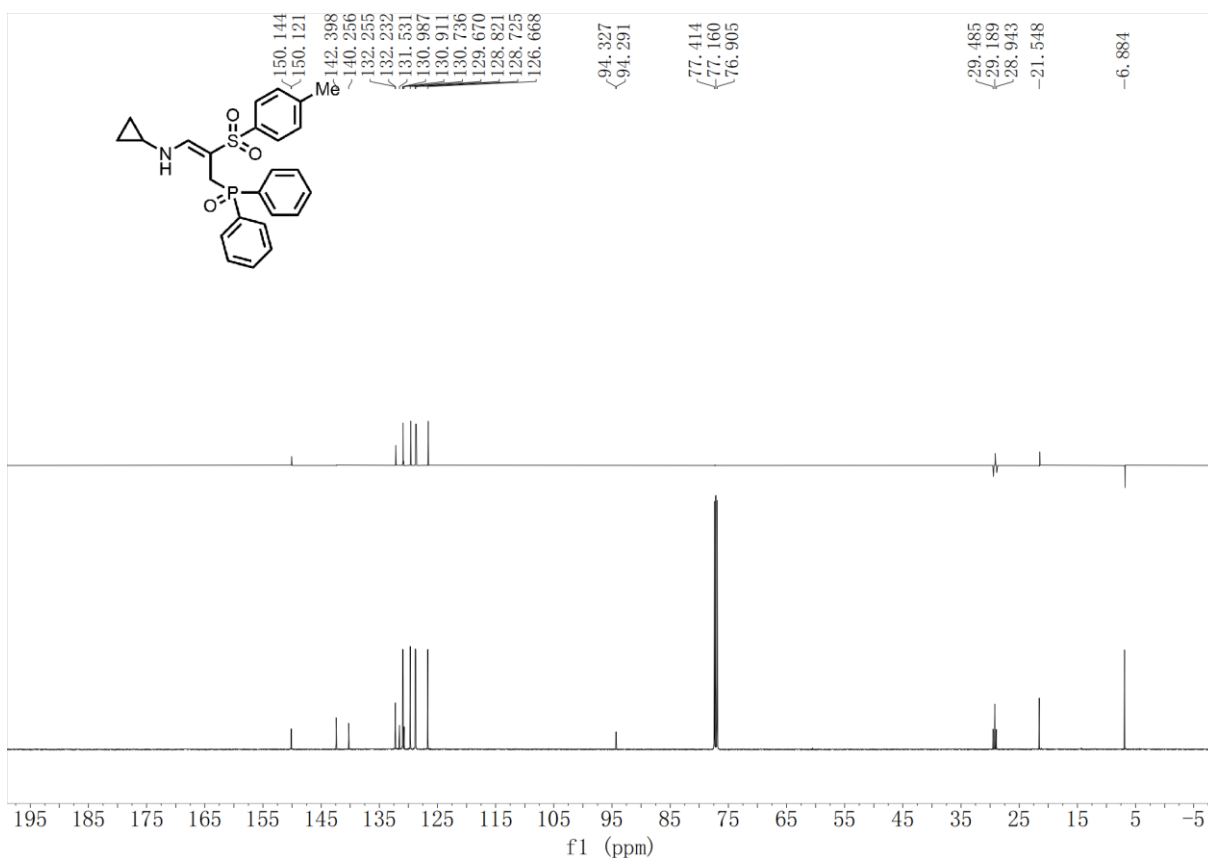

81 –  $^{31}\text{P}$  NMR (202 MHz,  $\text{CDCl}_3$ )

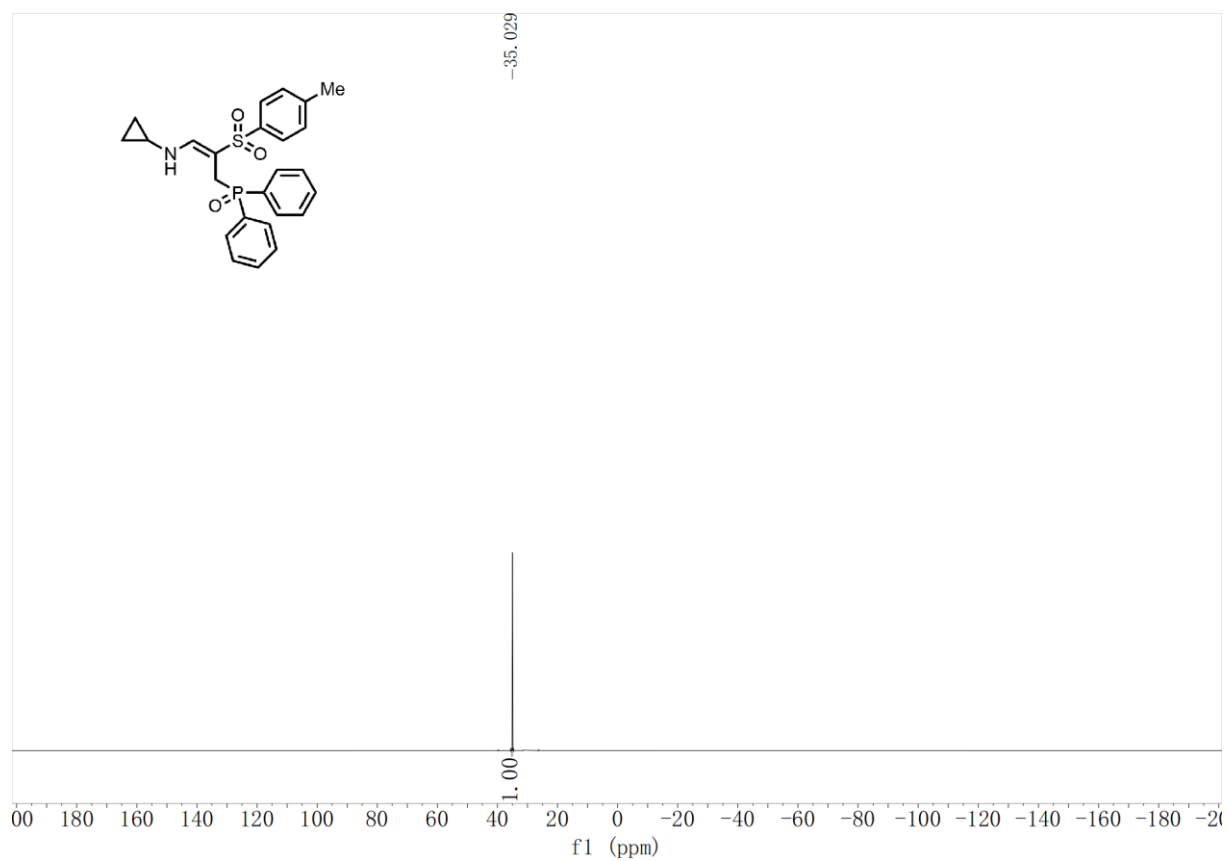

**8m** –  $^1\text{H}$  NMR (500 MHz,  $\text{CDCl}_3$ )

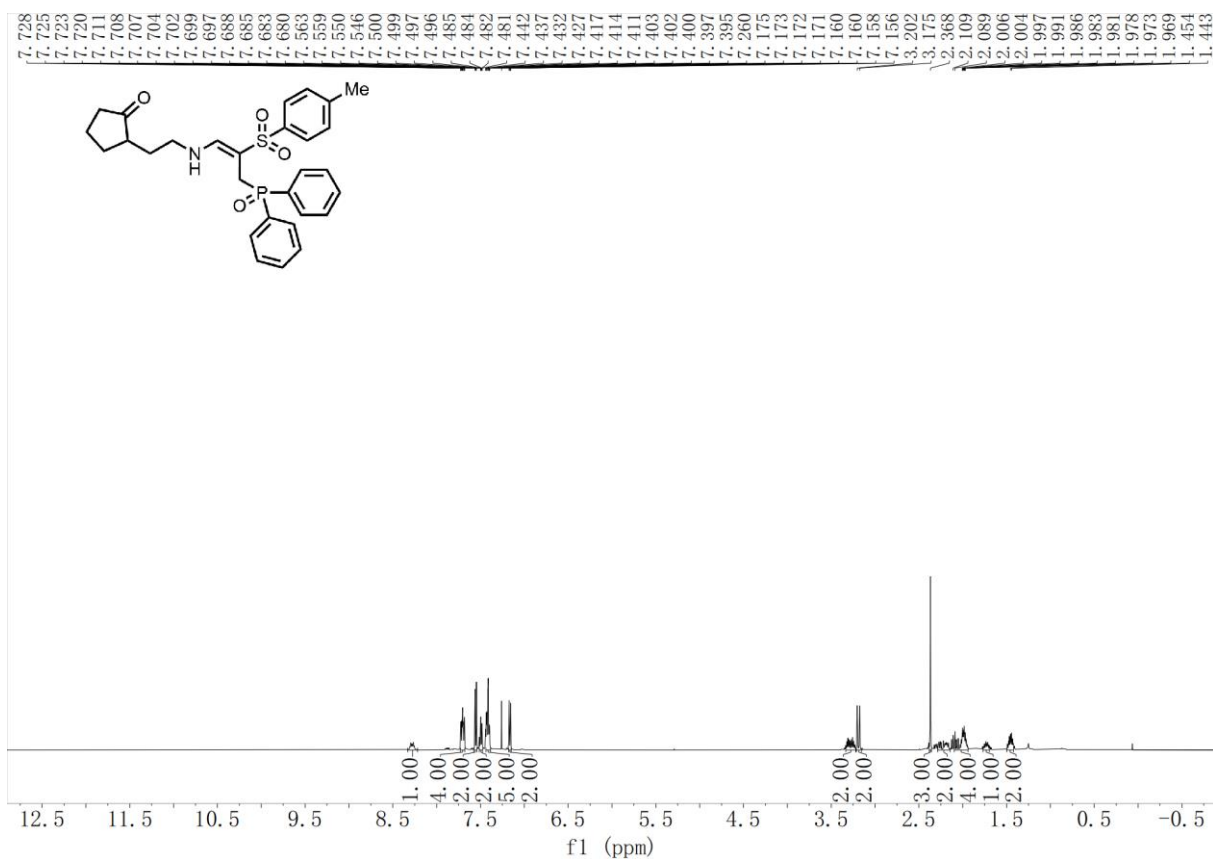

**8m** –  $^{13}\text{C}$  NMR (126 MHz,  $\text{CDCl}_3$ )

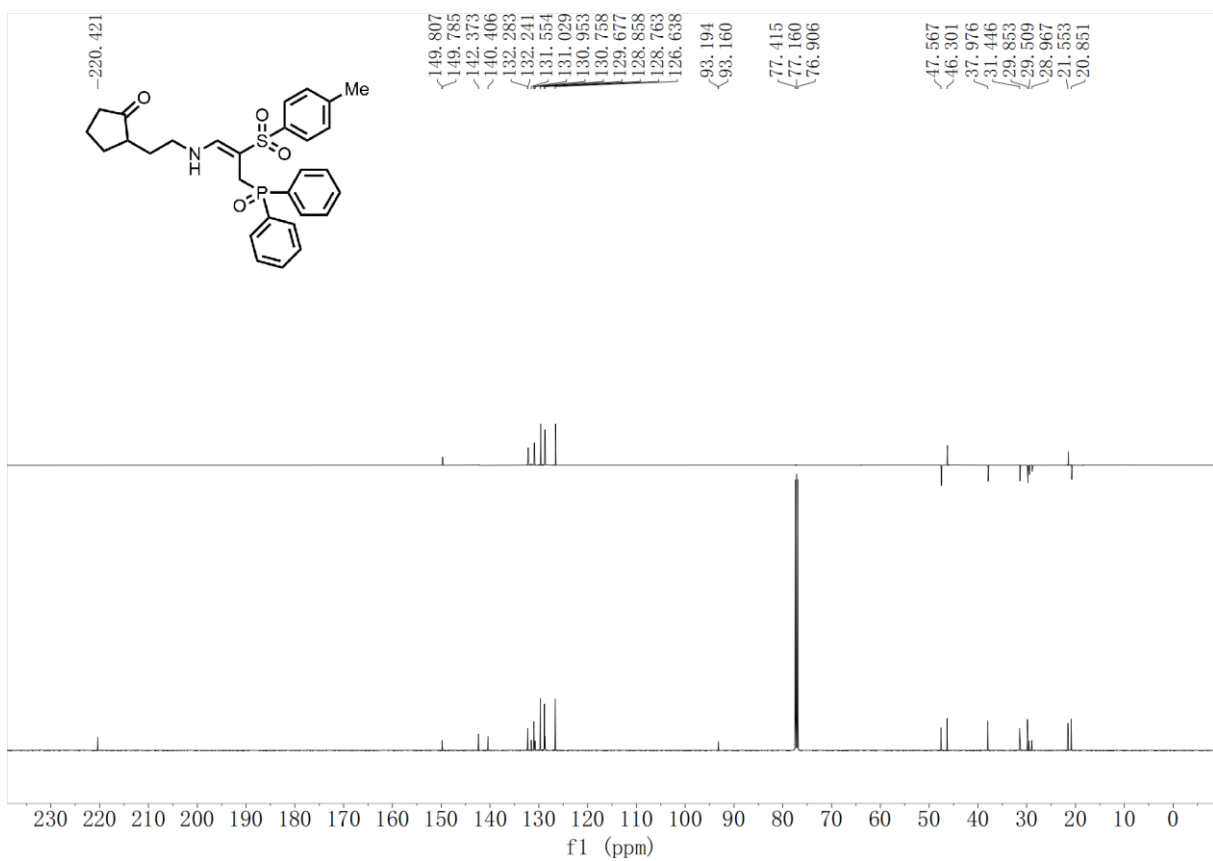

8m –  $^{31}\text{P}$  NMR (202 MHz,  $\text{CDCl}_3$ )

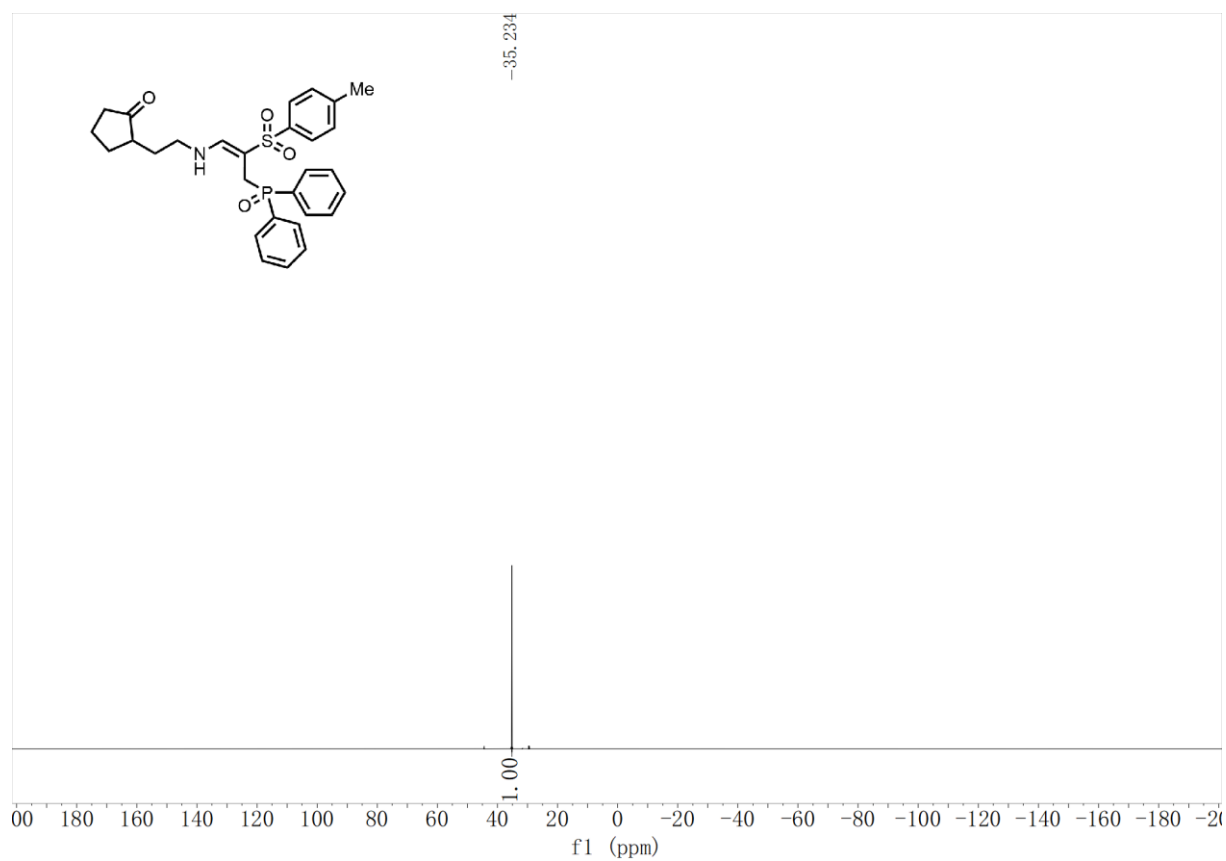

**8n** –  $^1\text{H}$  NMR (500 MHz,  $\text{CDCl}_3$ )

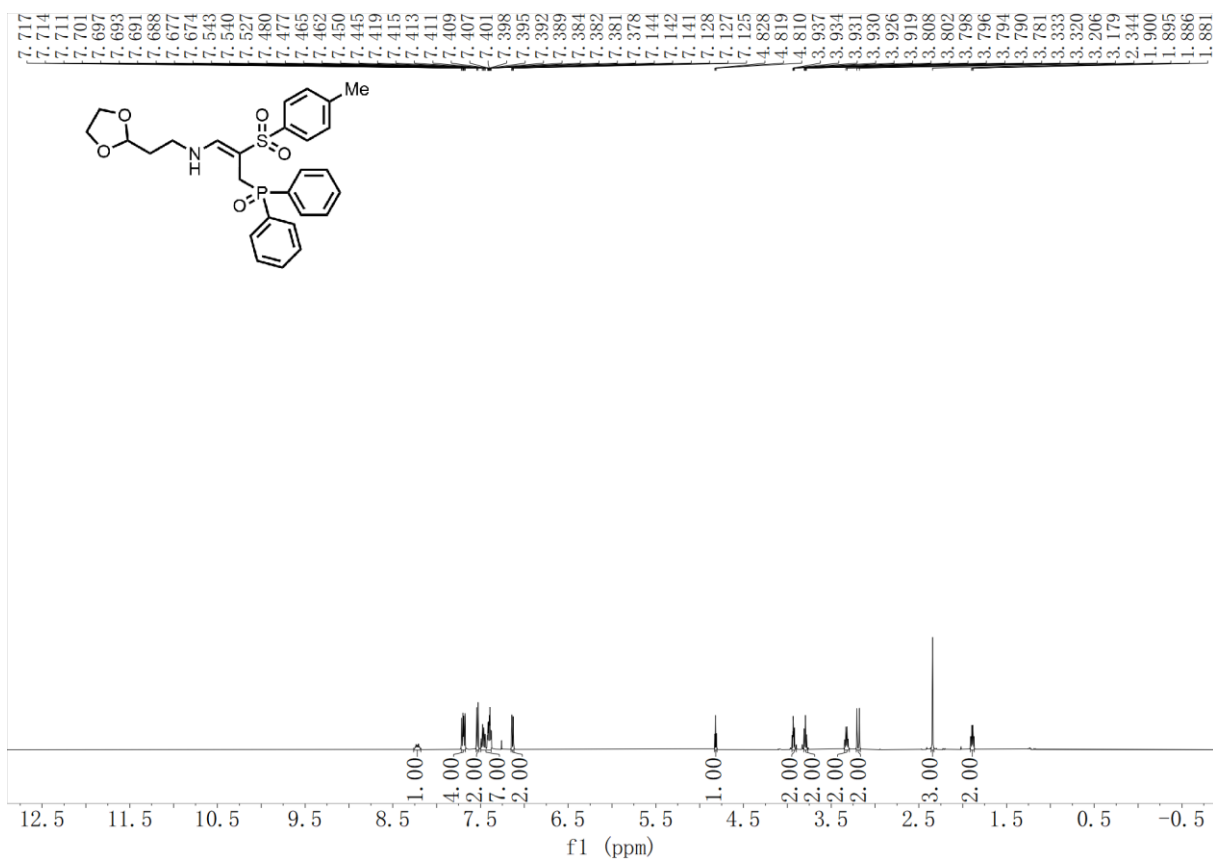

**8n** –  $^{13}\text{C}$  NMR (126 MHz,  $\text{CDCl}_3$ )

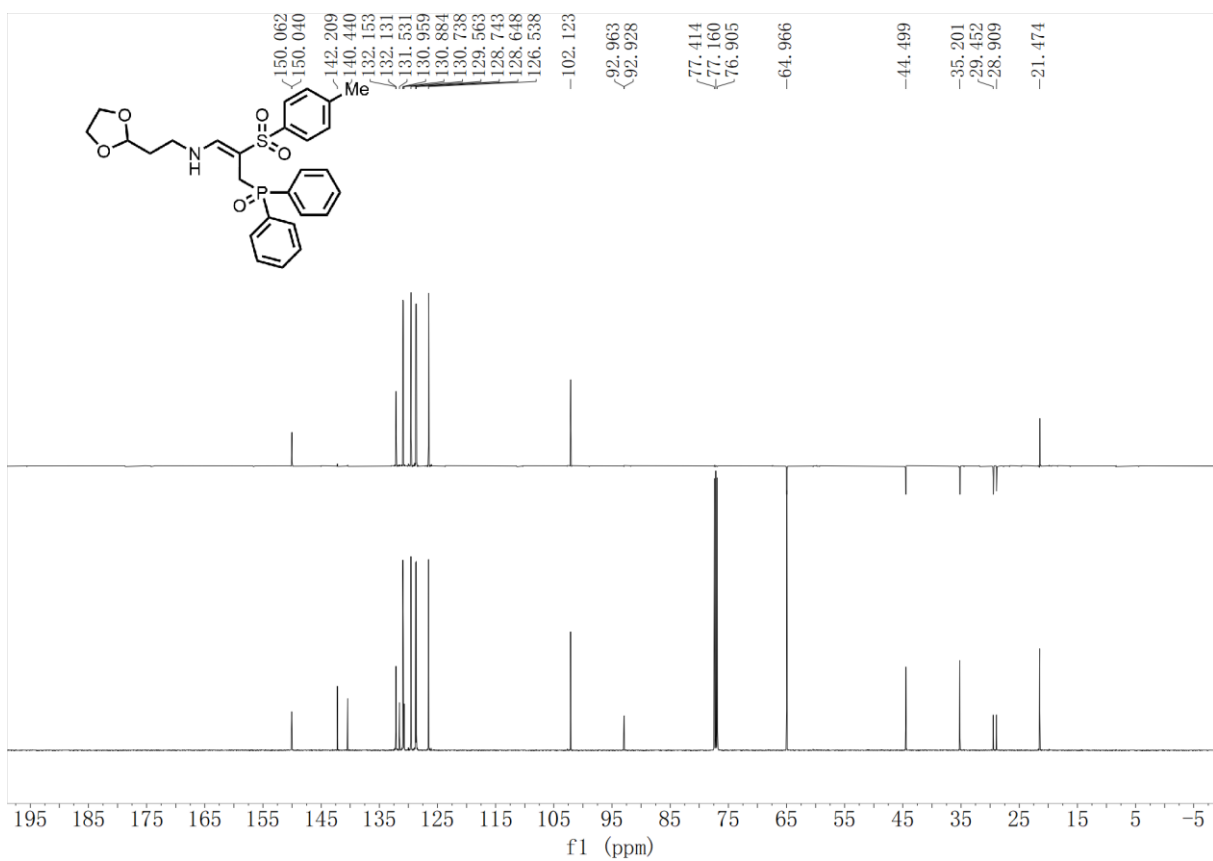

**8n** –  $^{31}\text{P}$  NMR (202 MHz,  $\text{CDCl}_3$ )

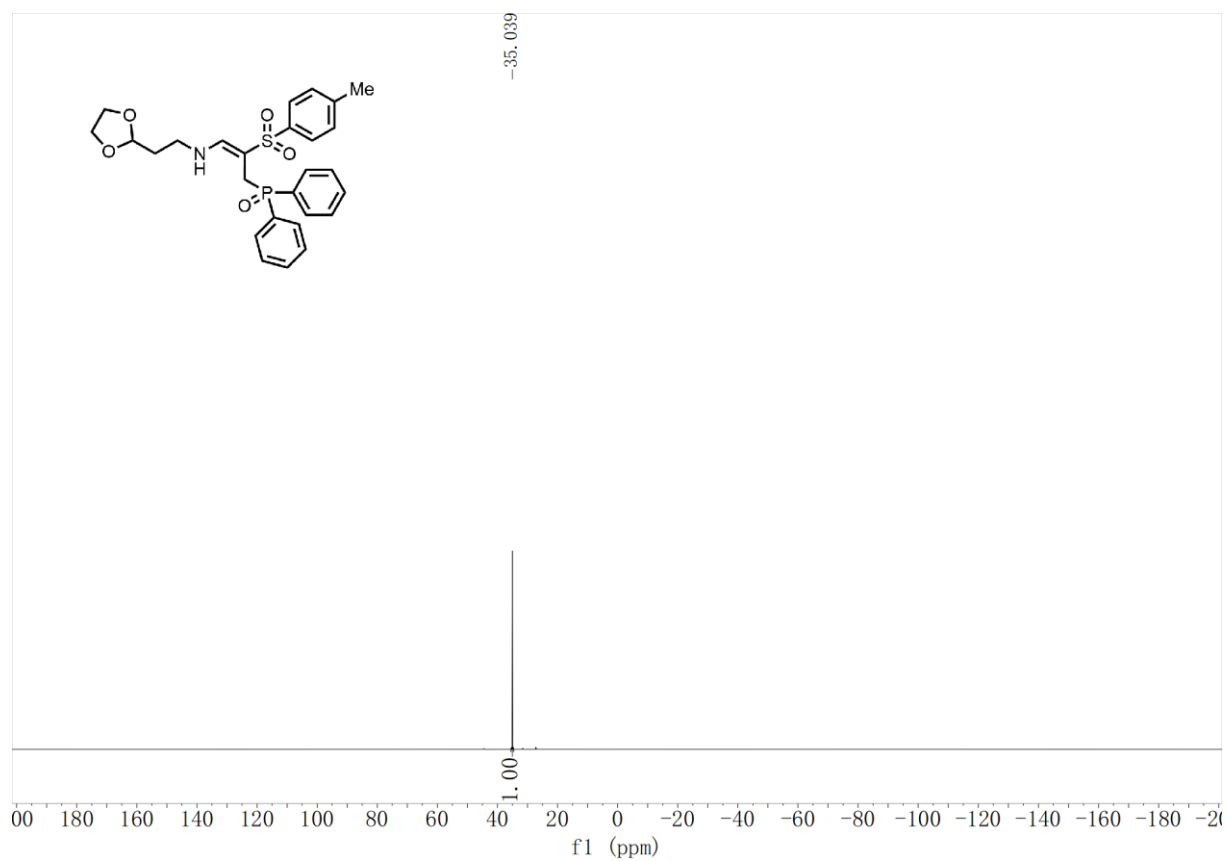

**8o** –  $^1\text{H}$  NMR (500 MHz,  $\text{CDCl}_3$ )

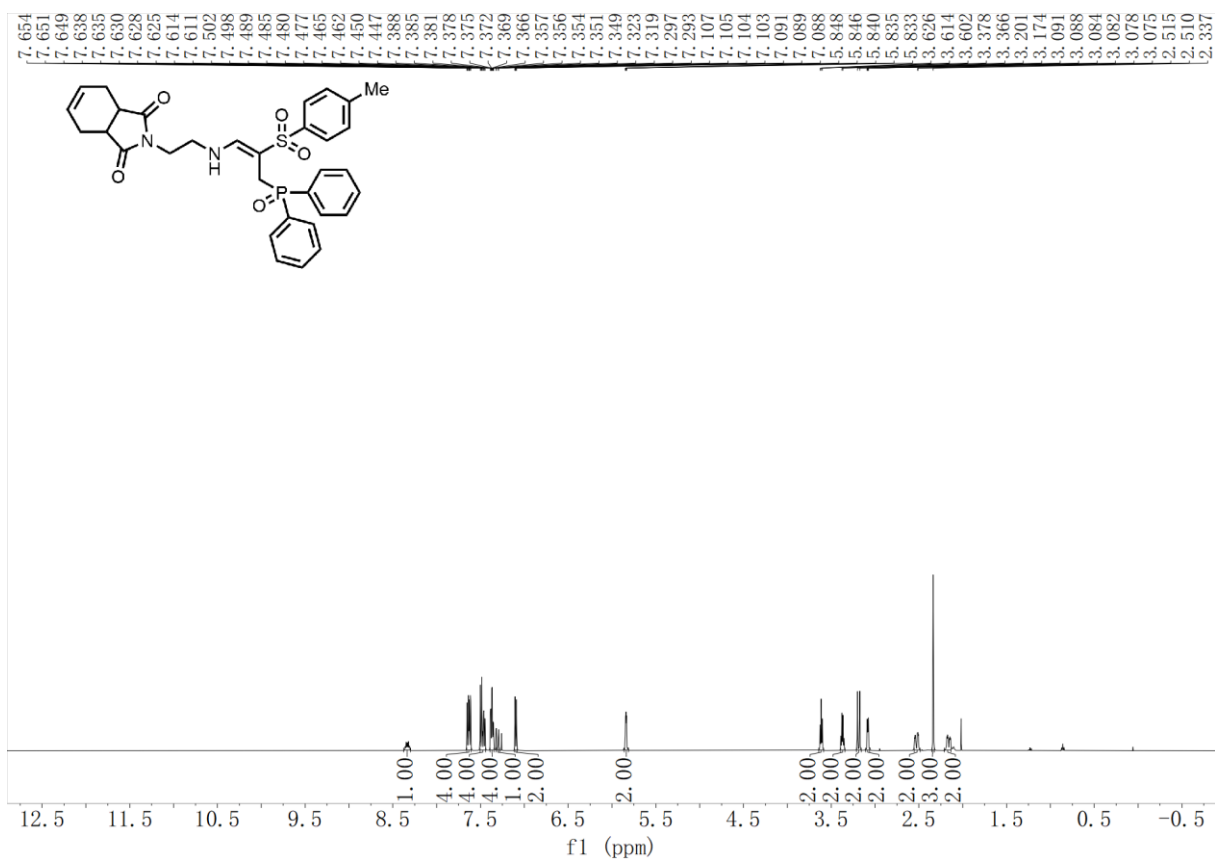

**8o** –  $^{13}\text{C}$  NMR (126 MHz,  $\text{CDCl}_3$ )

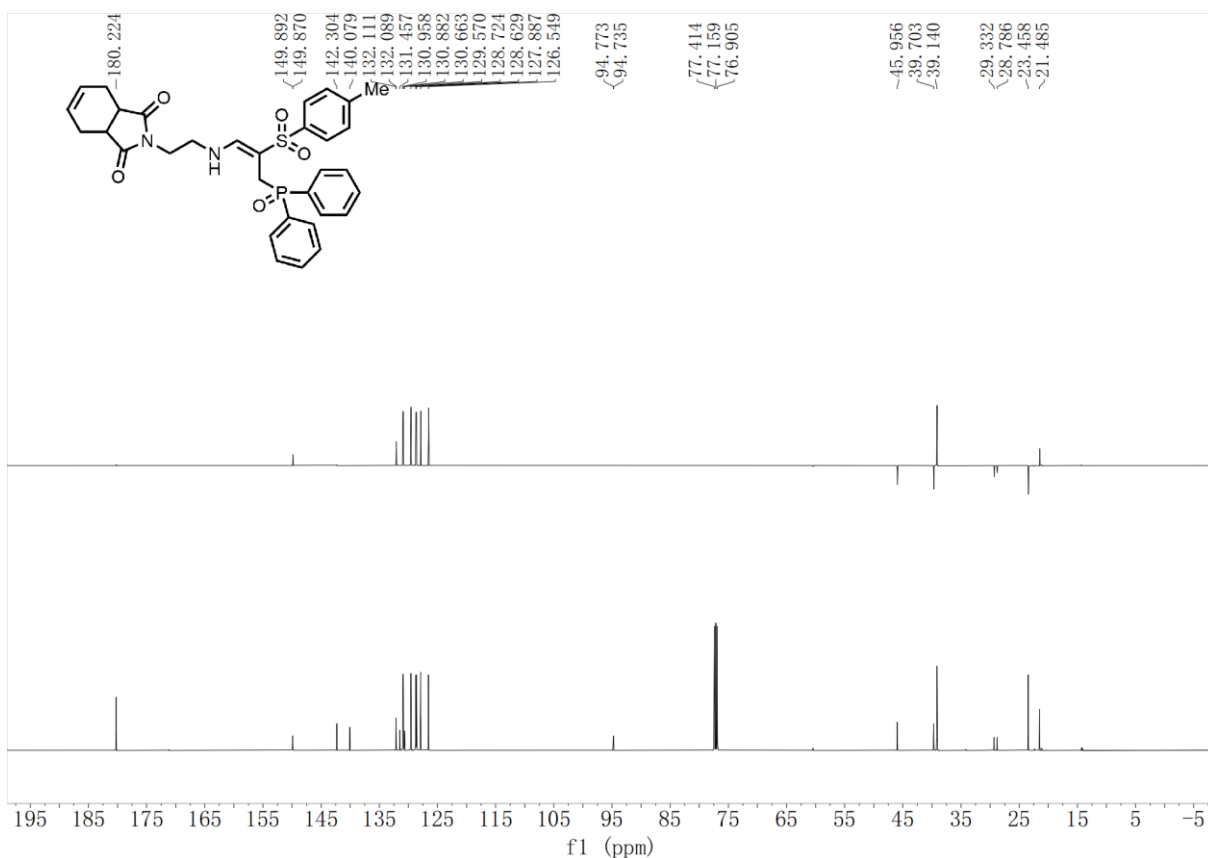

**8o** –  $^{31}\text{P}$  NMR (202 MHz,  $\text{CDCl}_3$ )

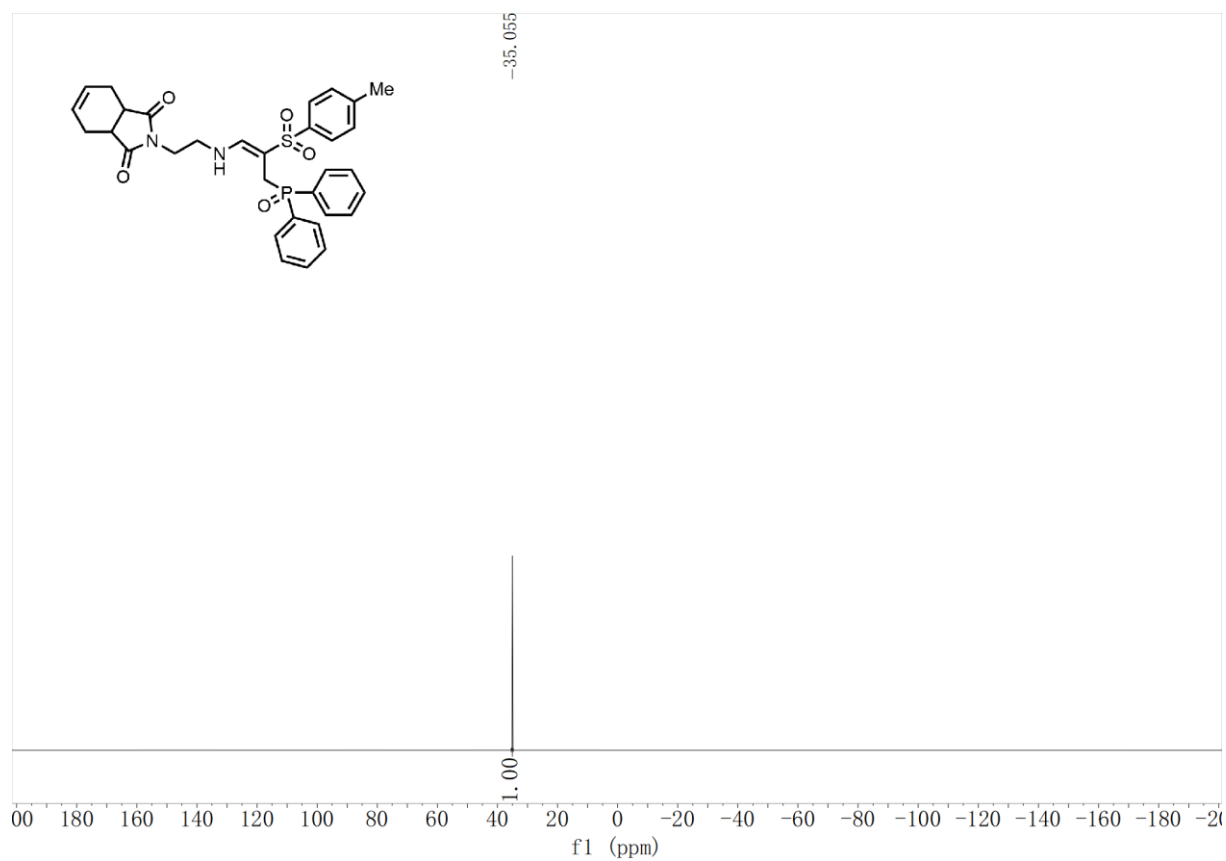



**8p** –  $^1\text{H}$  NMR (500 MHz,  $\text{CDCl}_3$ )

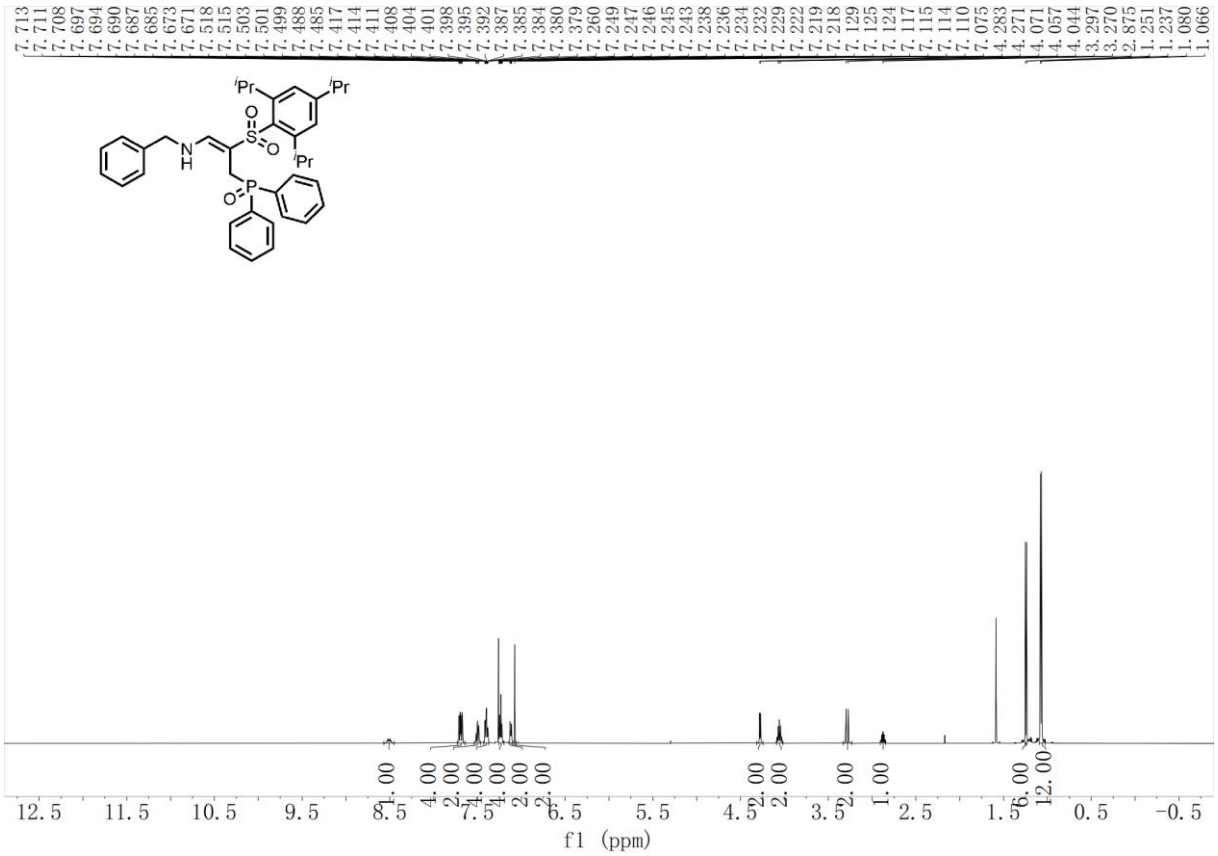

**8p** –  $^{13}\text{C}$  NMR (126 MHz,  $\text{CDCl}_3$ )

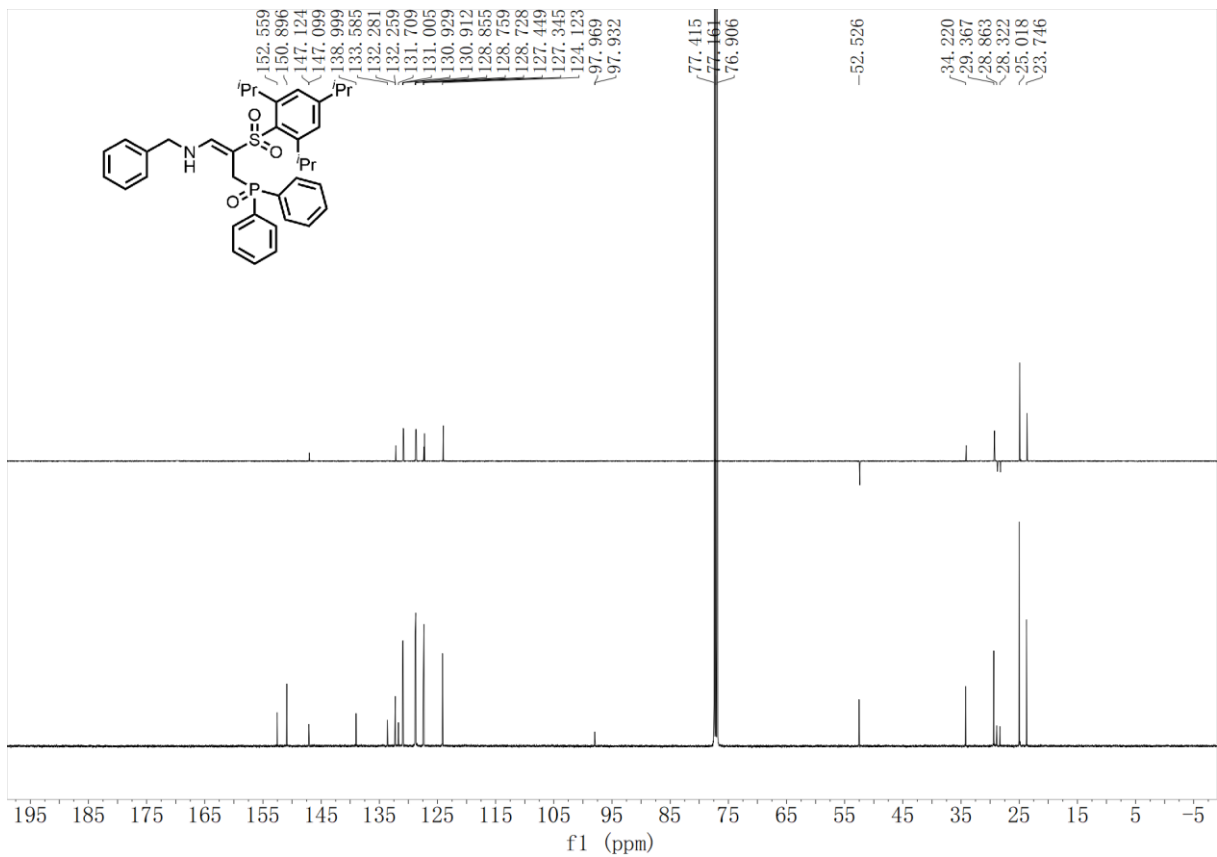

**8p** –  $^{31}\text{P}$  NMR (121 MHz,  $\text{CDCl}_3$ )

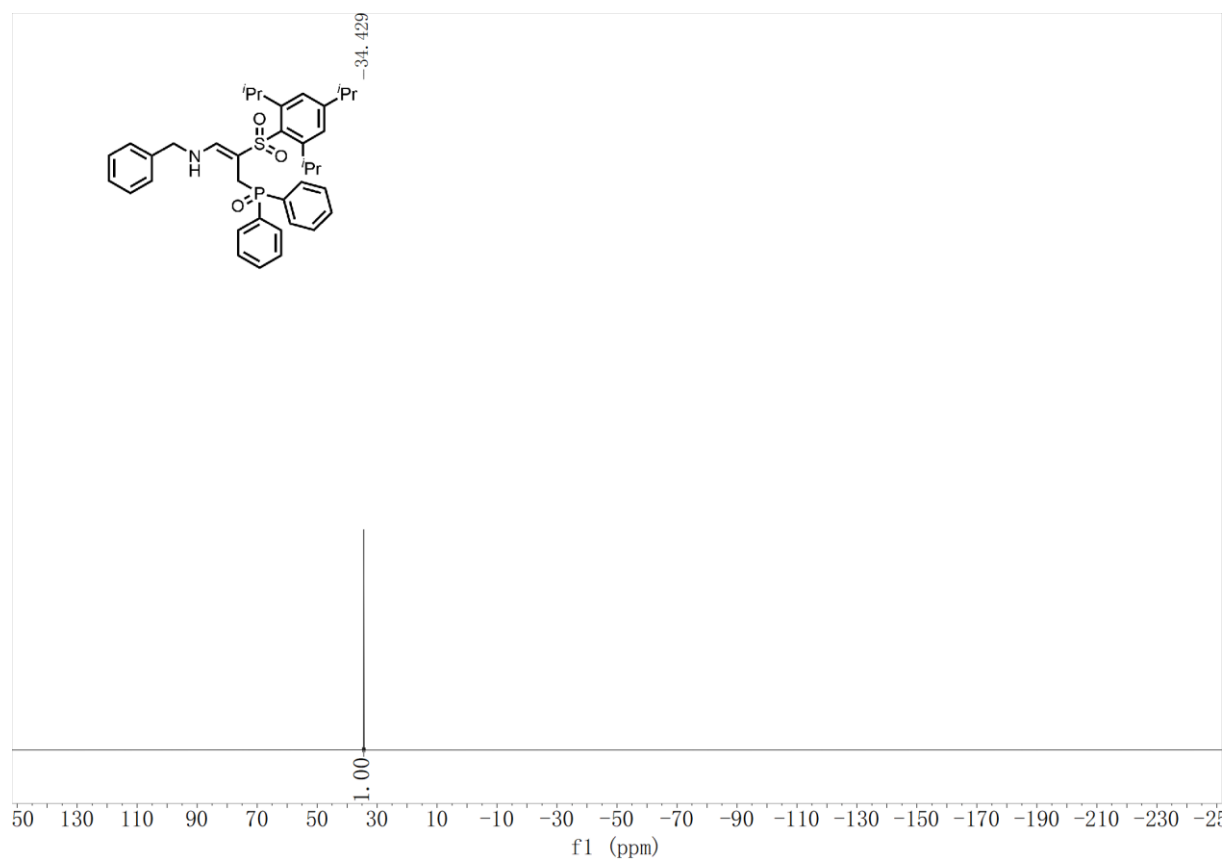

**8q** –  $^1\text{H}$  NMR (500 MHz,  $\text{CDCl}_3$ )

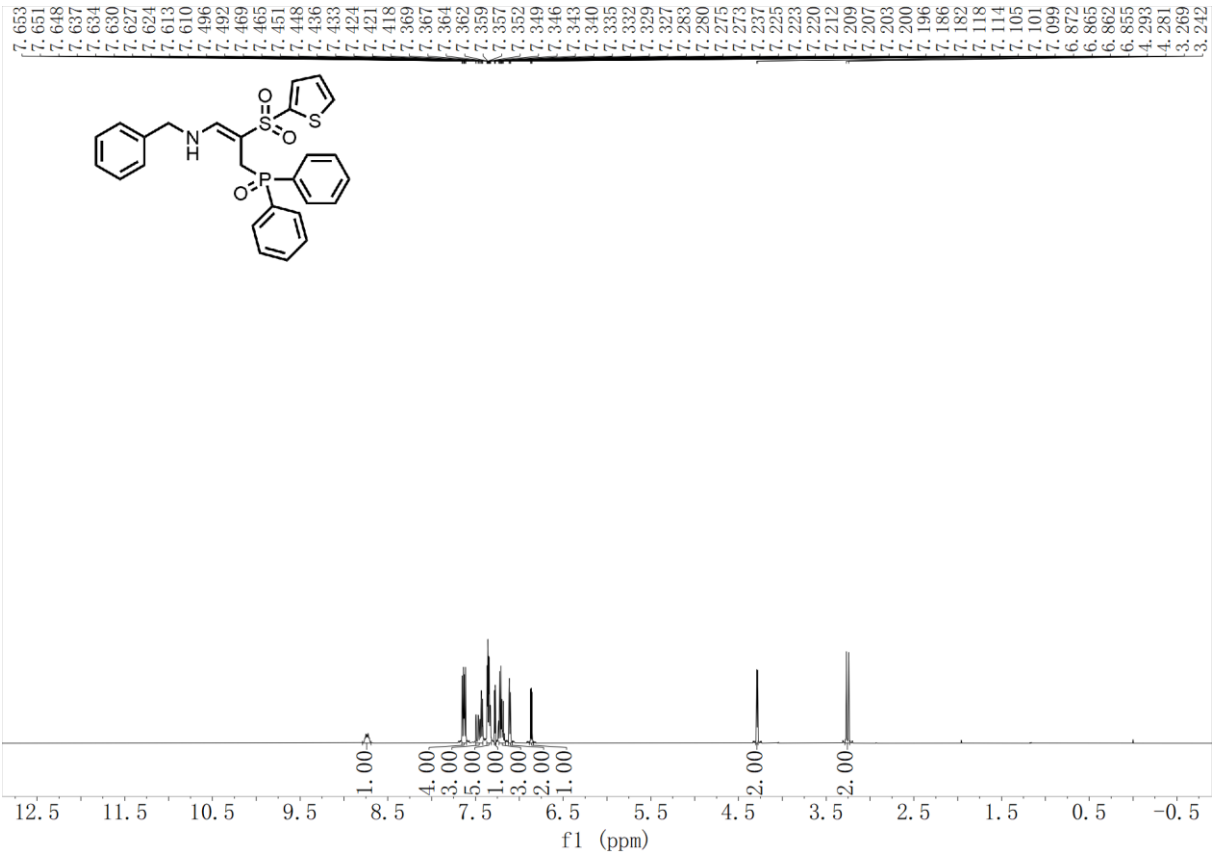

**8q** –  $^{13}\text{C}$  NMR (126 MHz,  $\text{CDCl}_3$ )

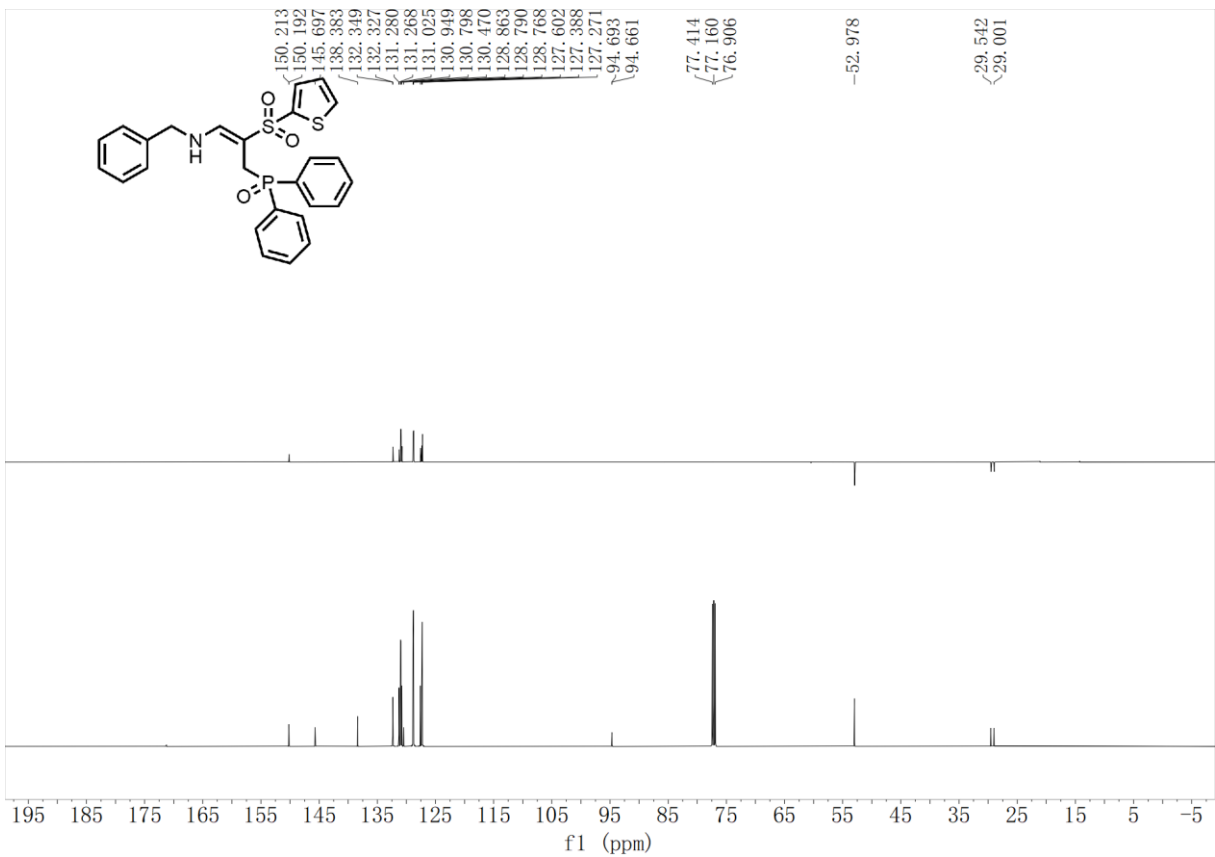

**8q** –  $^{31}\text{P}$  NMR (121 MHz,  $\text{CDCl}_3$ )

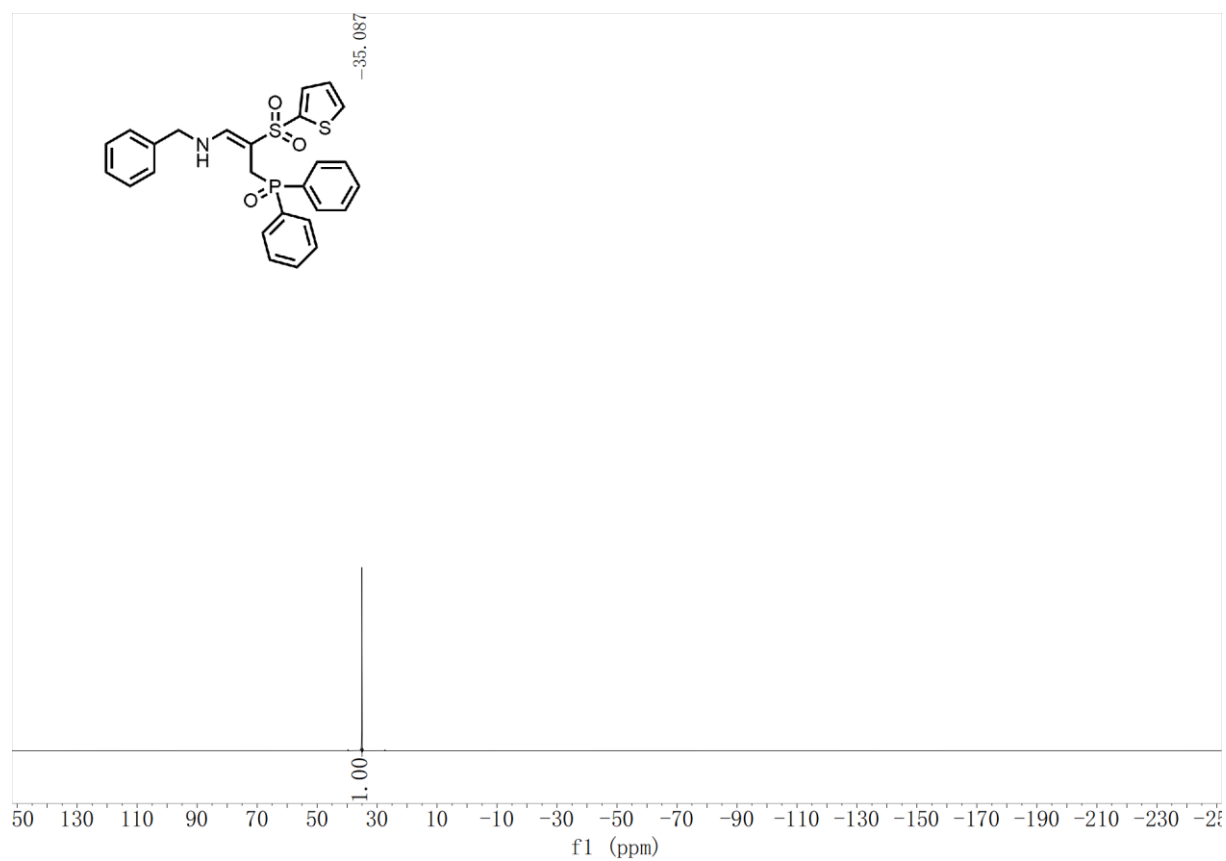

**8r** –  $^1\text{H}$  NMR (500 MHz,  $\text{CDCl}_3$ )

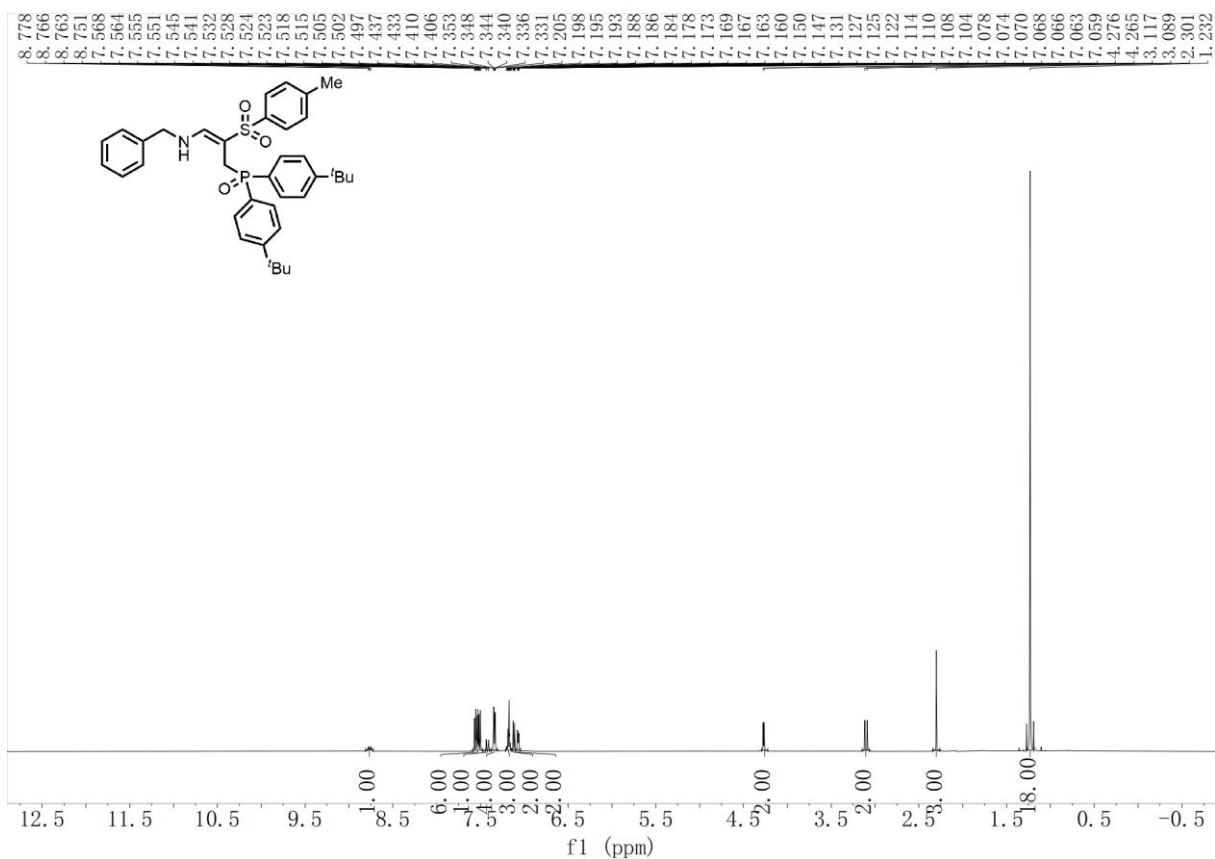

**8r** –  $^{13}\text{C}$  NMR (126 MHz,  $\text{CDCl}_3$ )

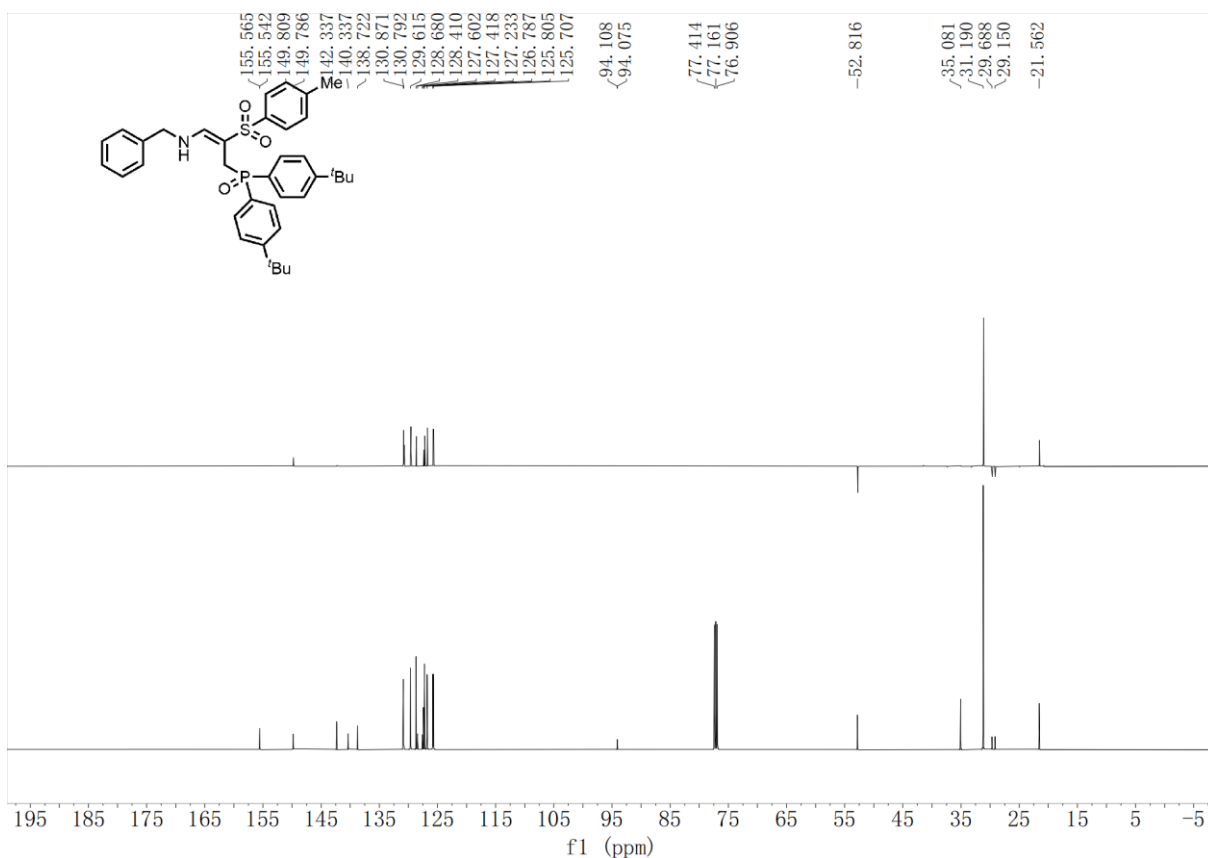

**8r** –  $^{31}\text{P}$  NMR (121 MHz,  $\text{CDCl}_3$ )

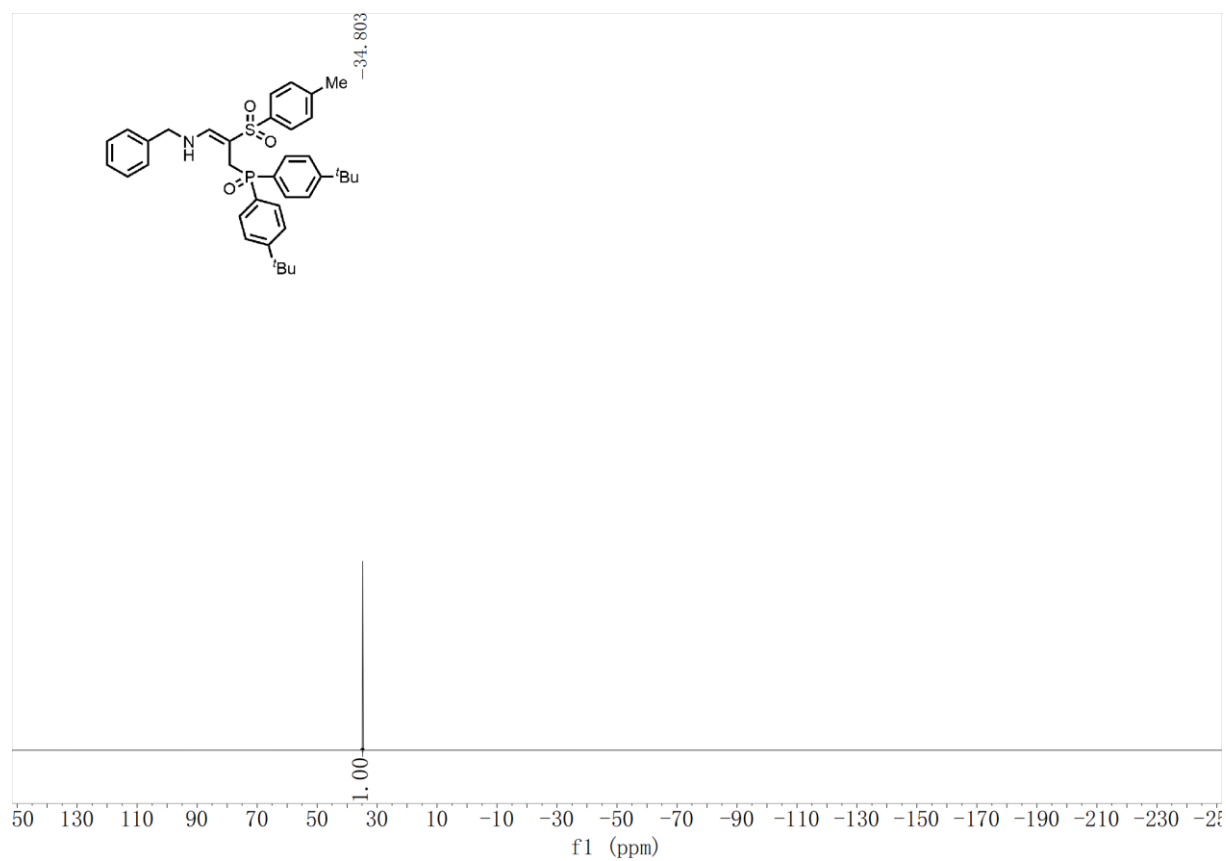

**8s** –  $^1\text{H}$  NMR (500 MHz,  $\text{CDCl}_3$ )

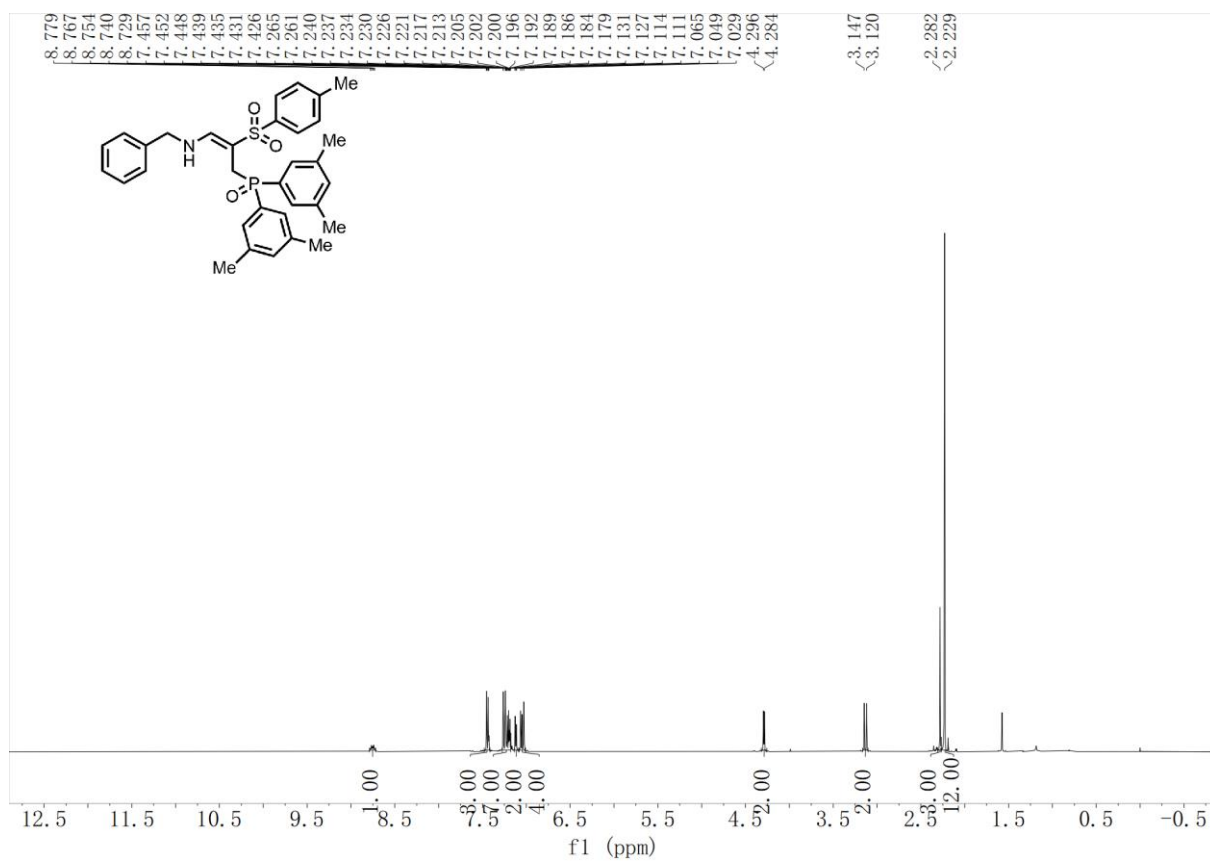

**8s** –  $^{13}\text{C}$  NMR (126 MHz,  $\text{CDCl}_3$ )

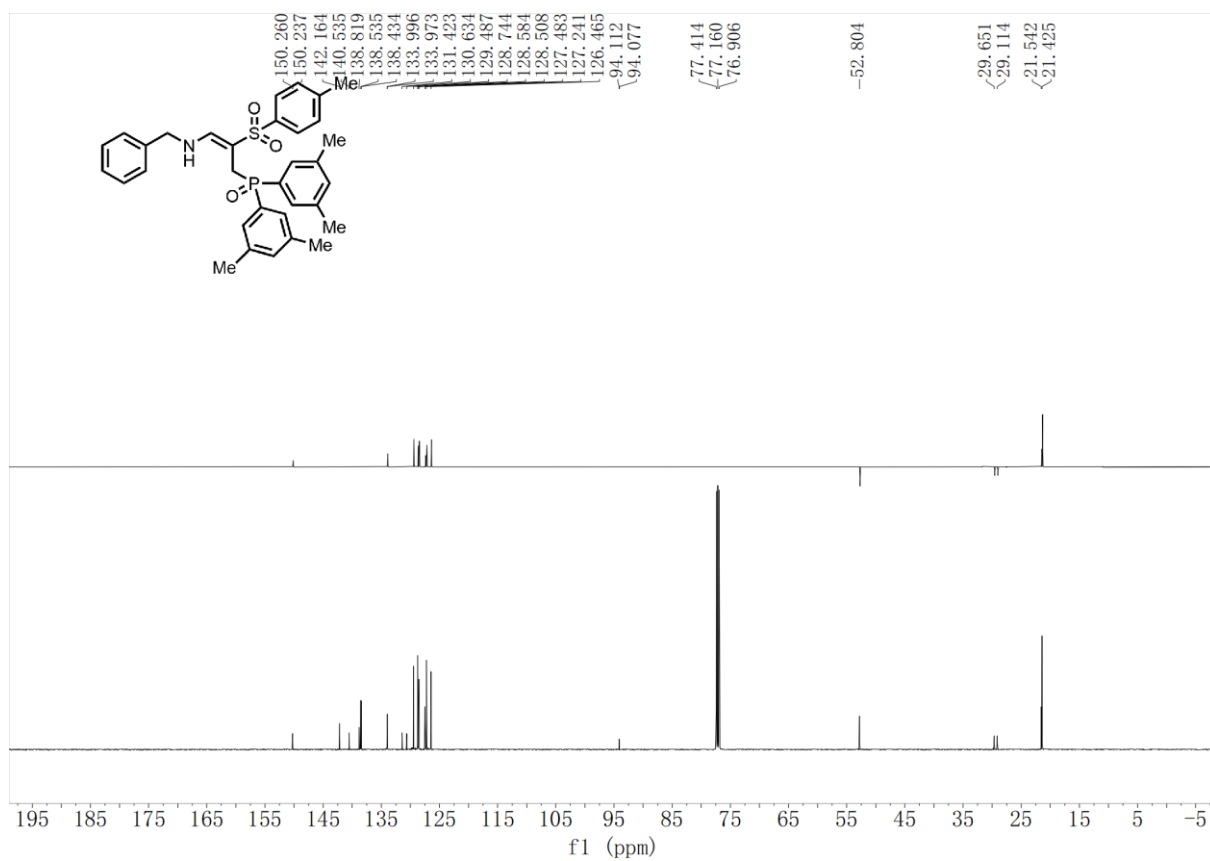

**8s** –  $^{31}\text{P}$  NMR (121 MHz,  $\text{CDCl}_3$ )

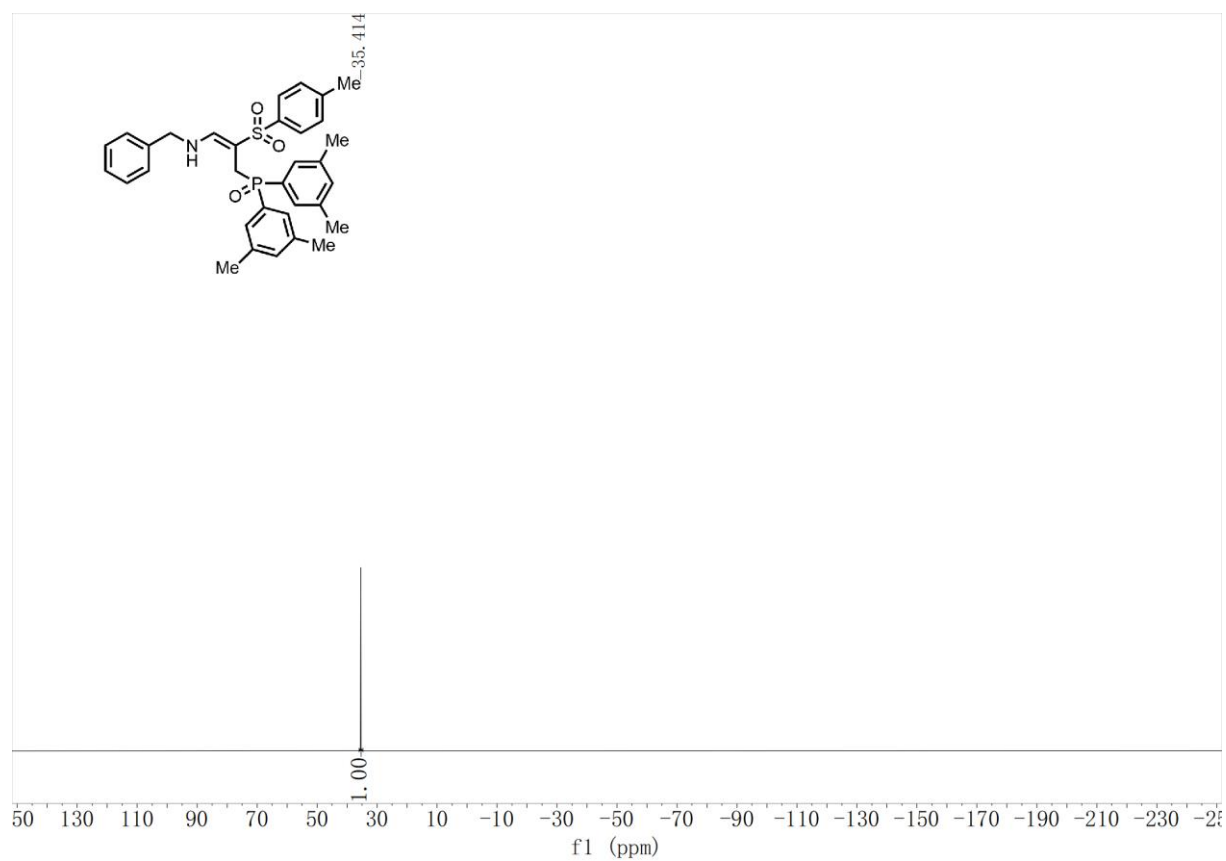



**8t** –  $^1\text{H}$  NMR (500 MHz,  $\text{CDCl}_3$ )

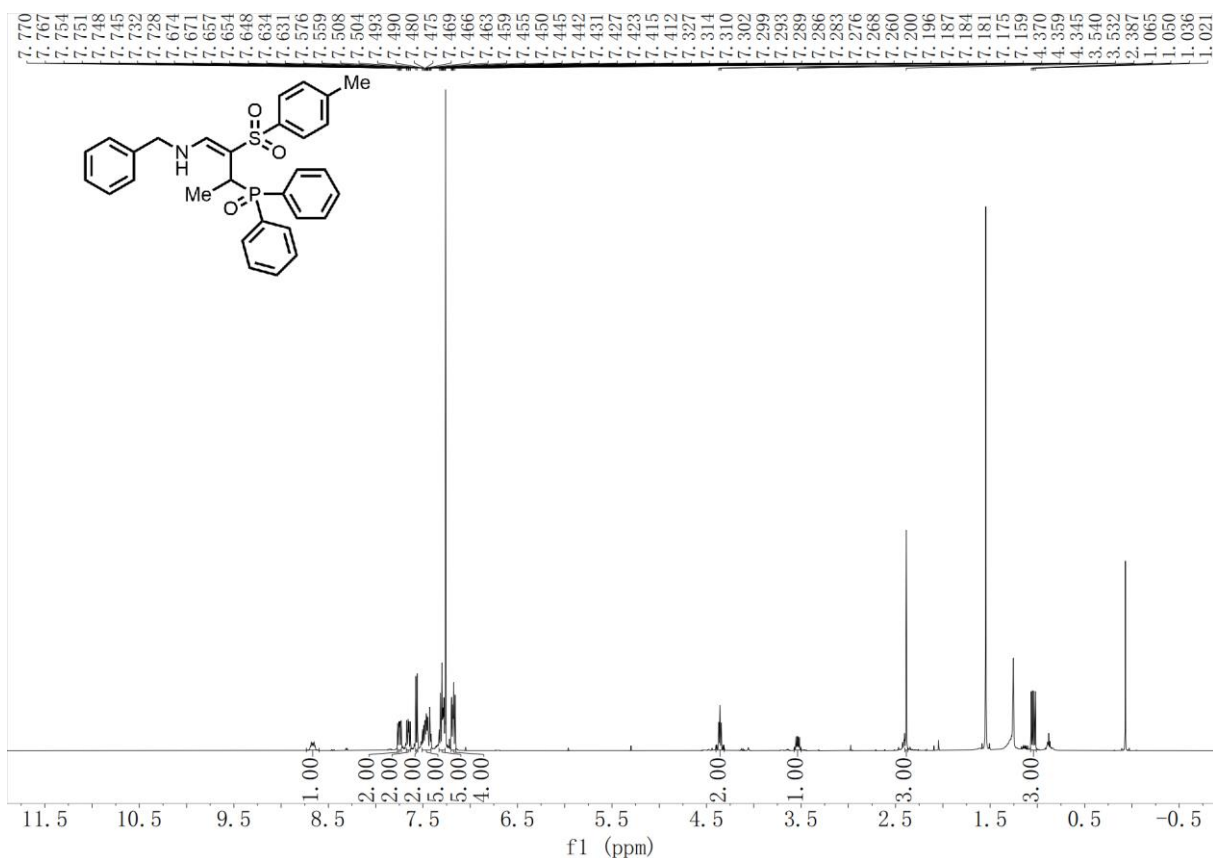

**8t** –  $^{13}\text{C}$  NMR (126 MHz,  $\text{CDCl}_3$ )

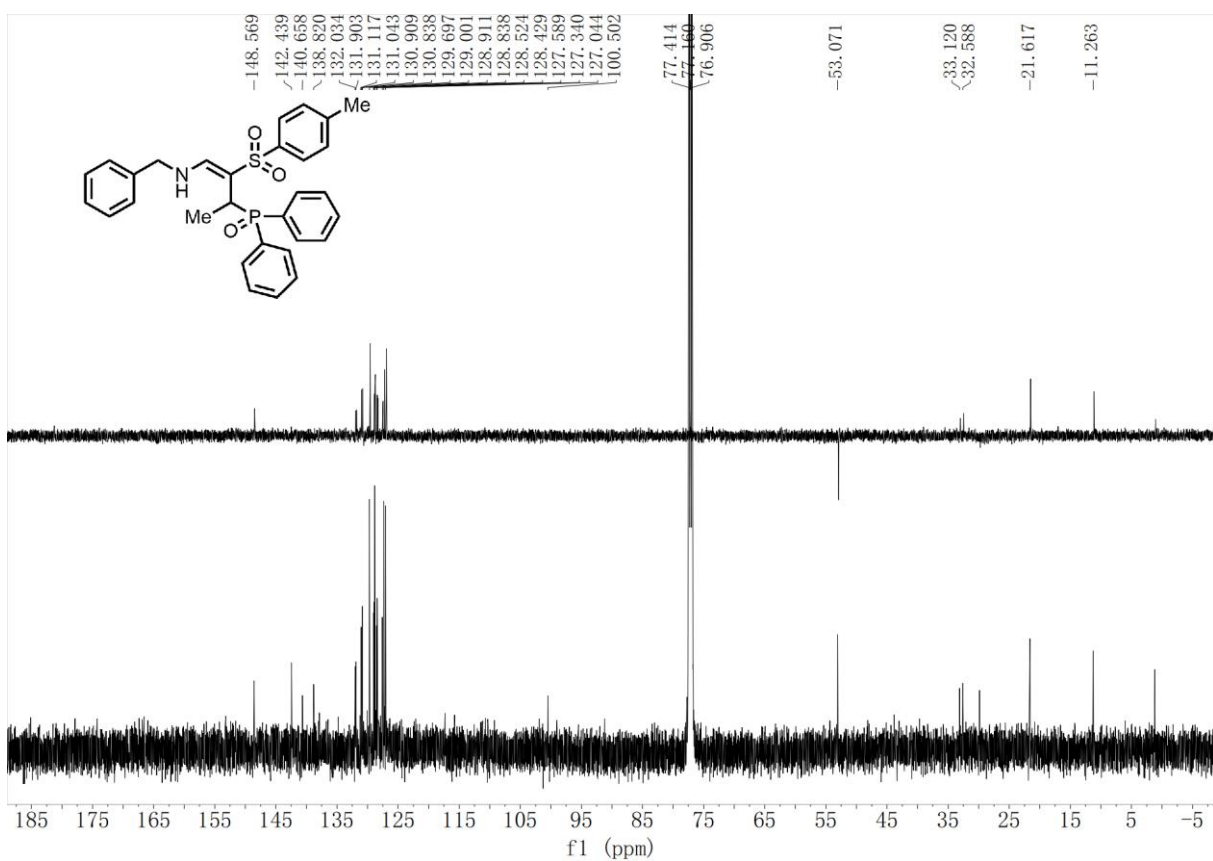

**8t** –  $^{31}\text{P}$  NMR (162 MHz,  $\text{CDCl}_3$ )

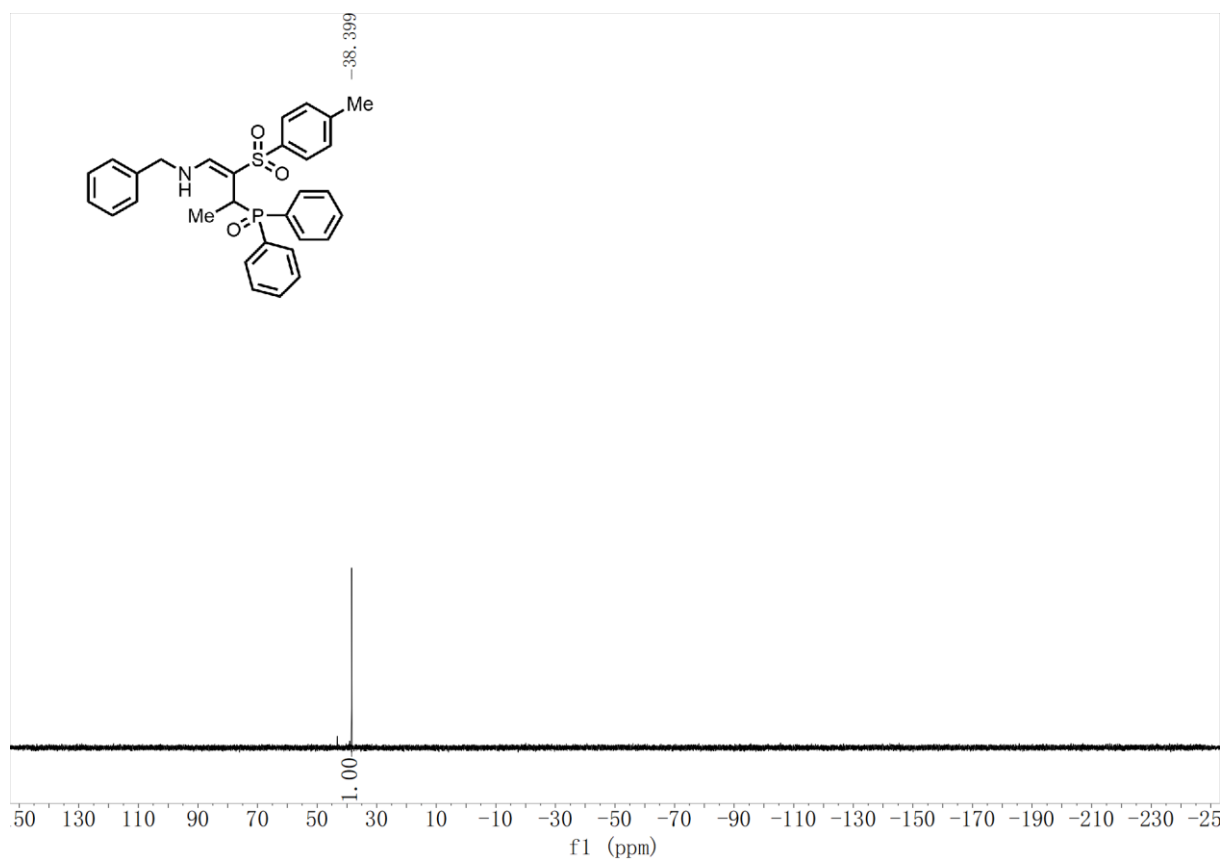

**8u** –  $^1\text{H}$  NMR (500 MHz,  $\text{CDCl}_3$ )

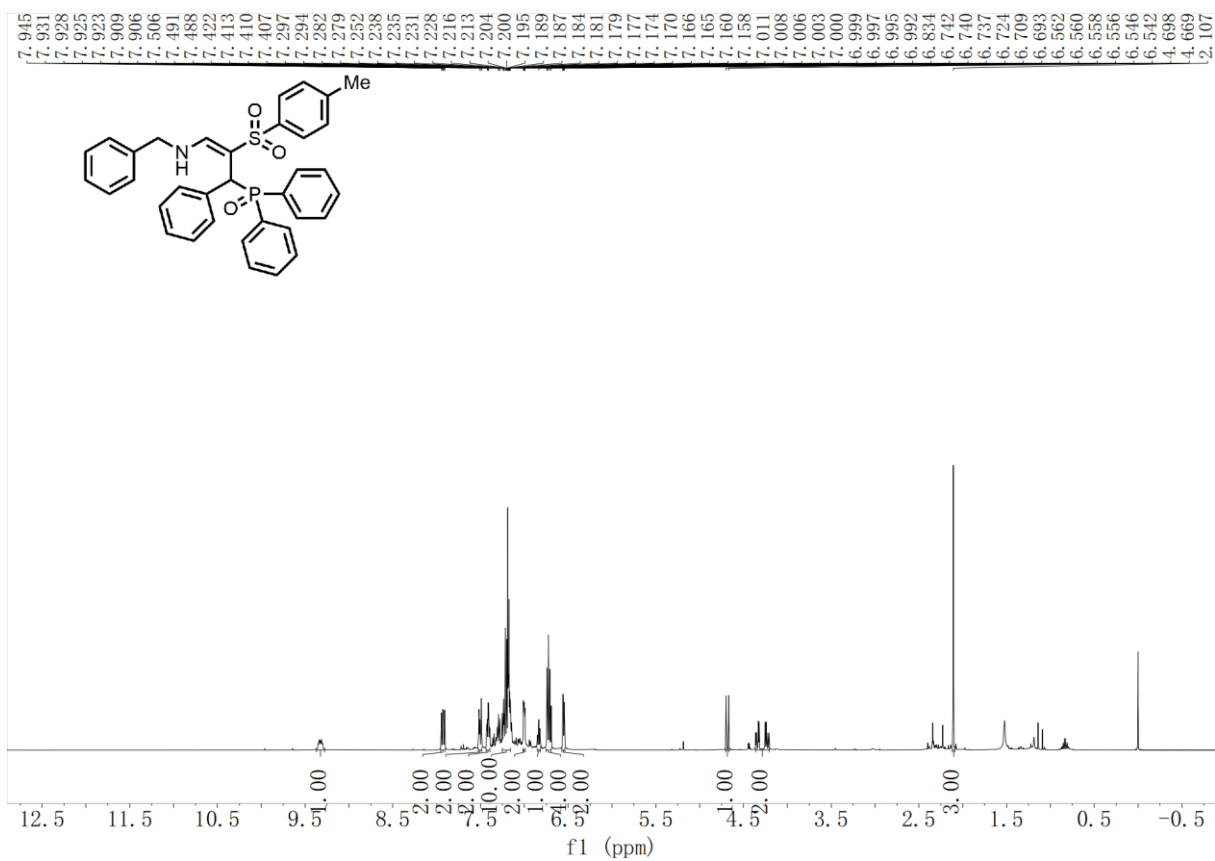

**8u** –  $^{13}\text{C}$  NMR (126 MHz,  $\text{CDCl}_3$ )

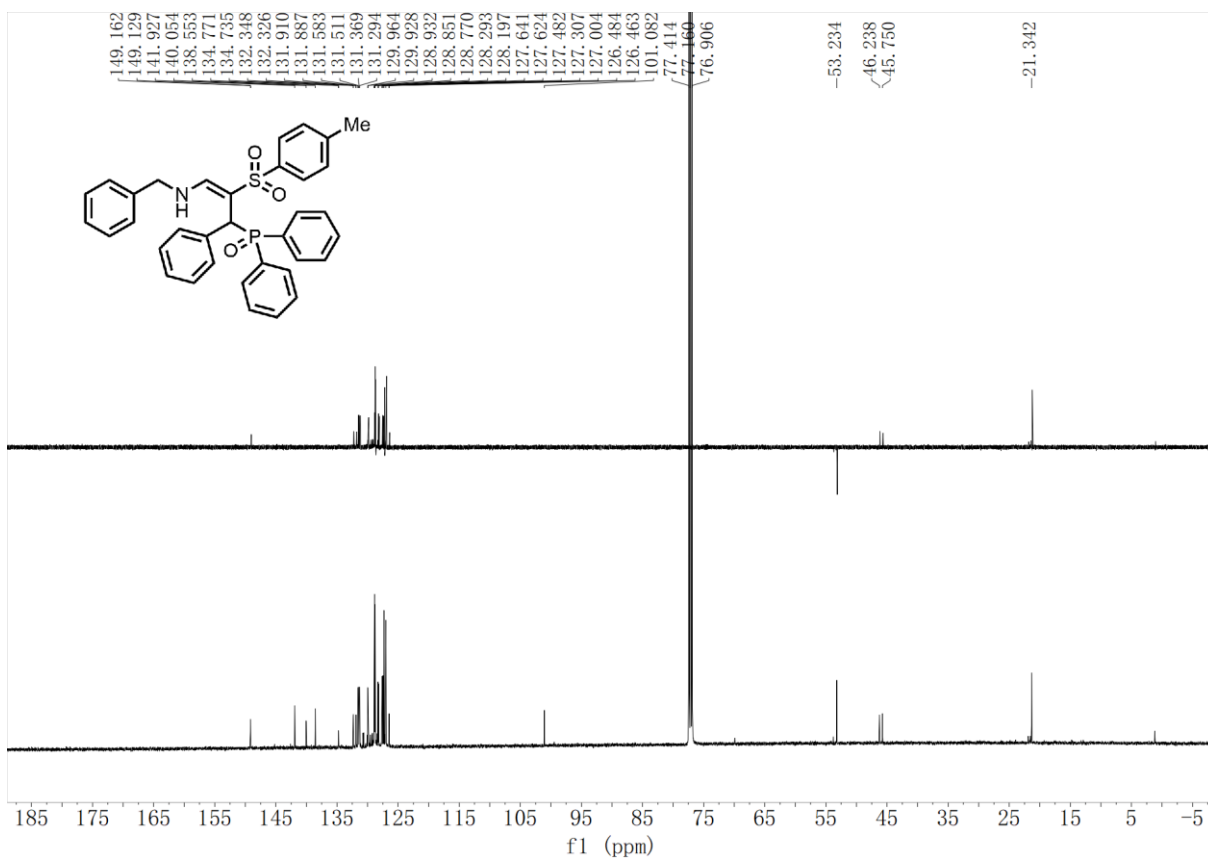

**8u** –  $^{31}\text{P}$  NMR (121 MHz,  $\text{CDCl}_3$ )

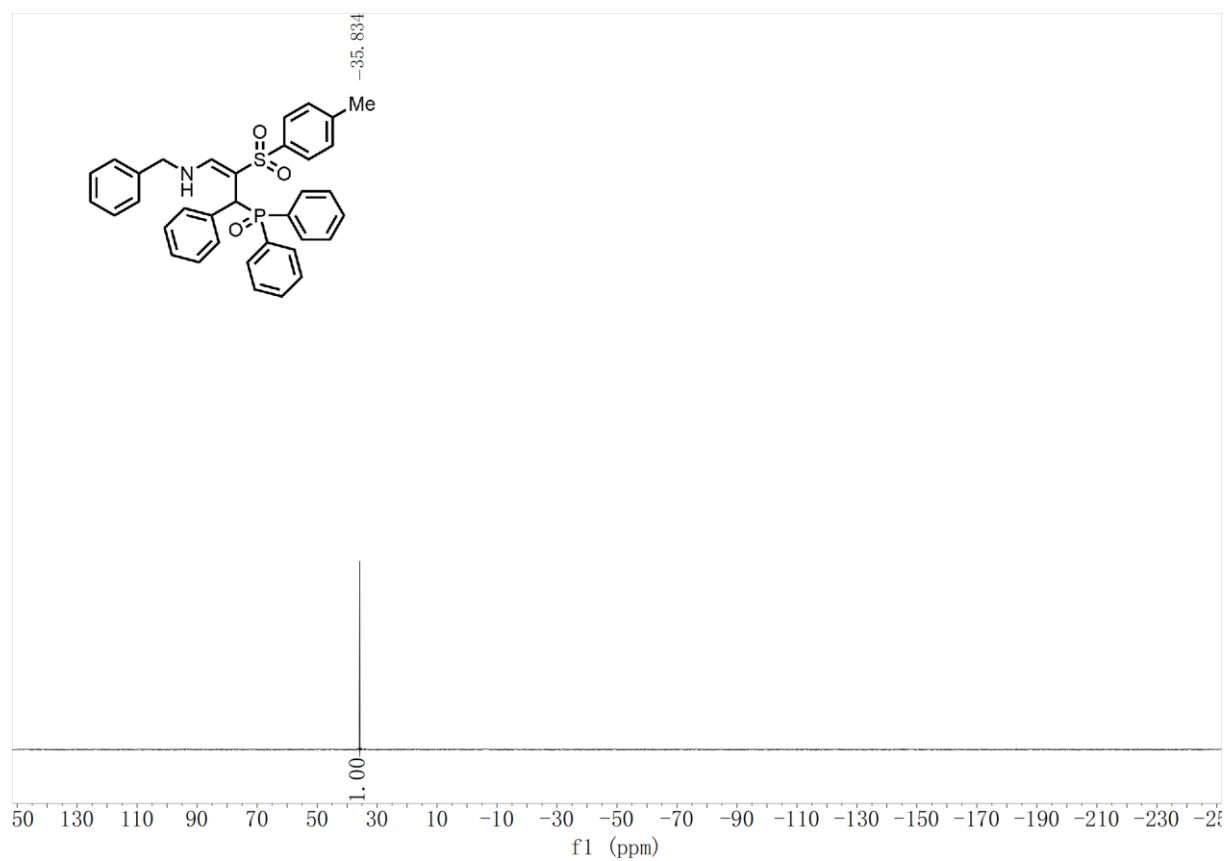

9 – <sup>1</sup>H NMR (500 MHz, CDCl<sub>3</sub>)

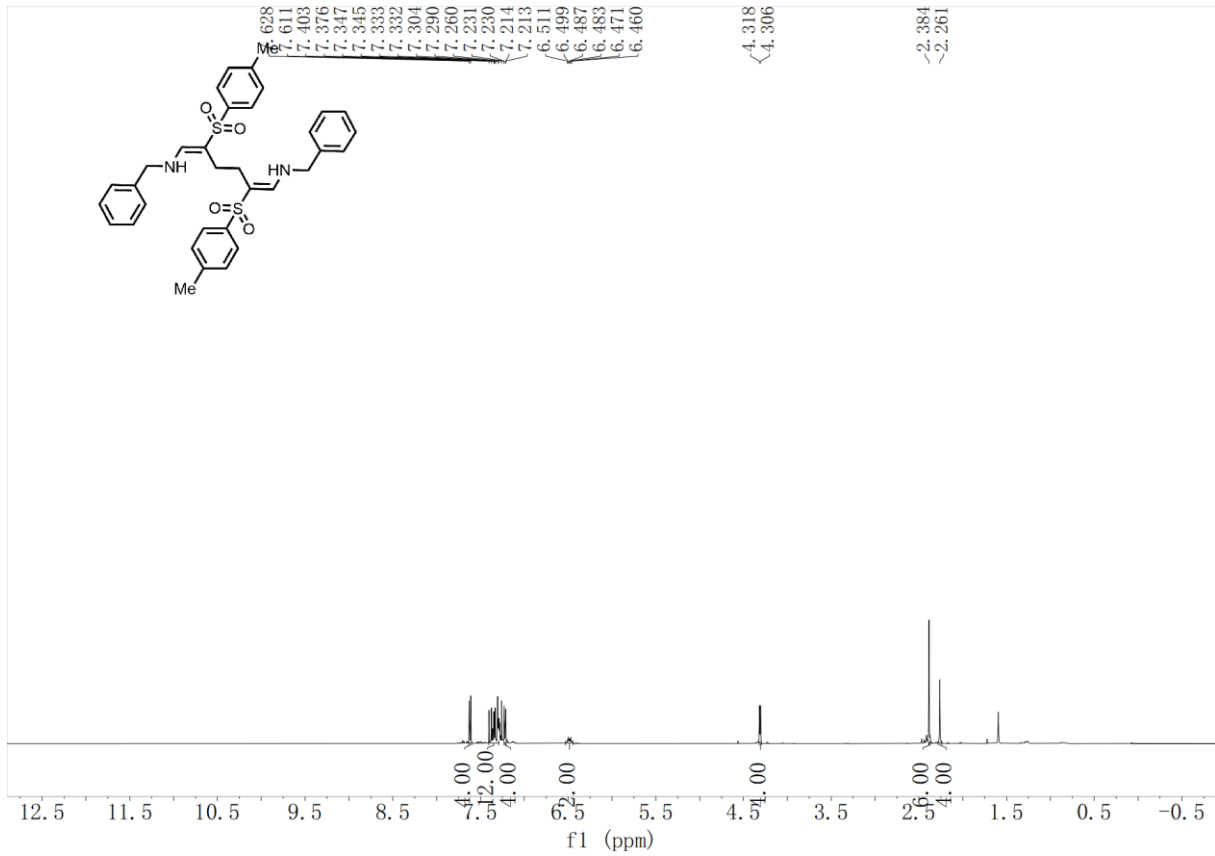

9 – <sup>13</sup>C NMR (126 MHz, CDCl<sub>3</sub>)

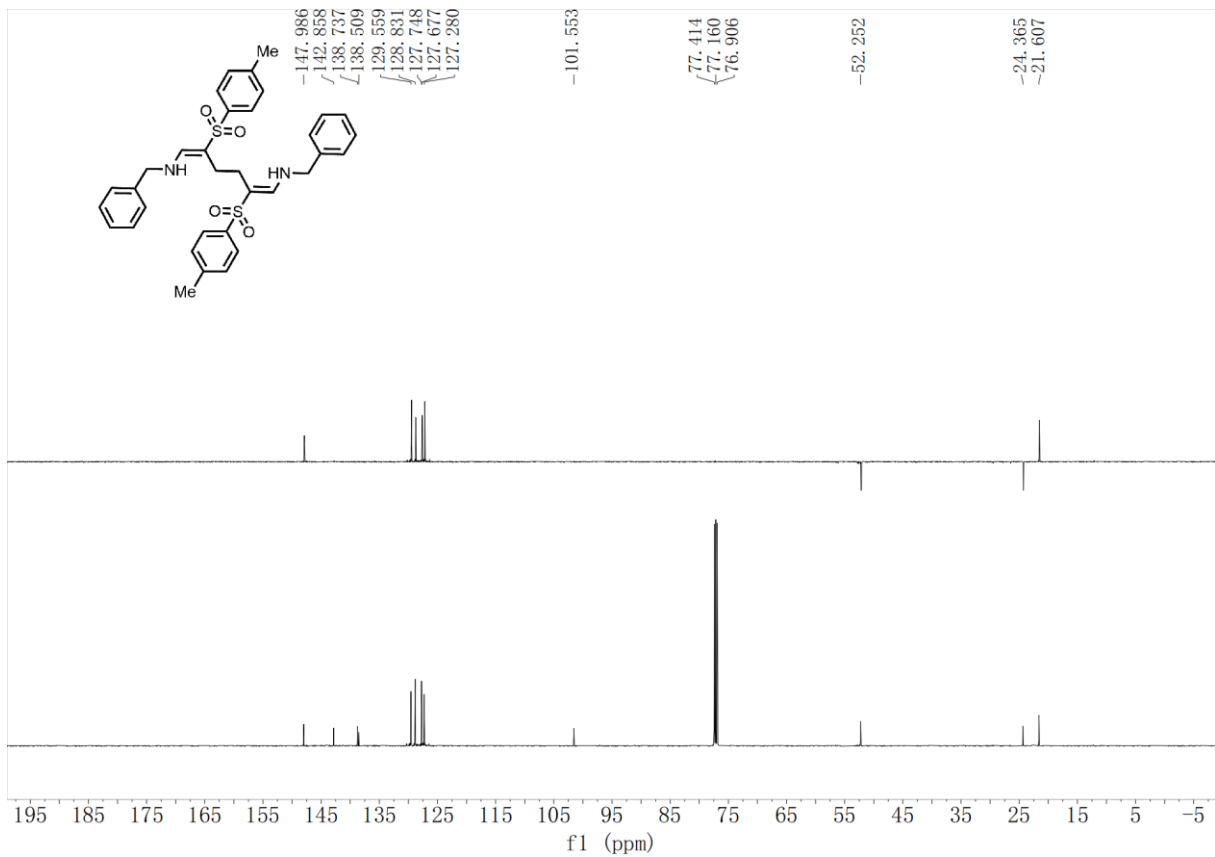

TEMPO-3a – <sup>1</sup>H NMR (500 MHz, CDCl<sub>3</sub>)

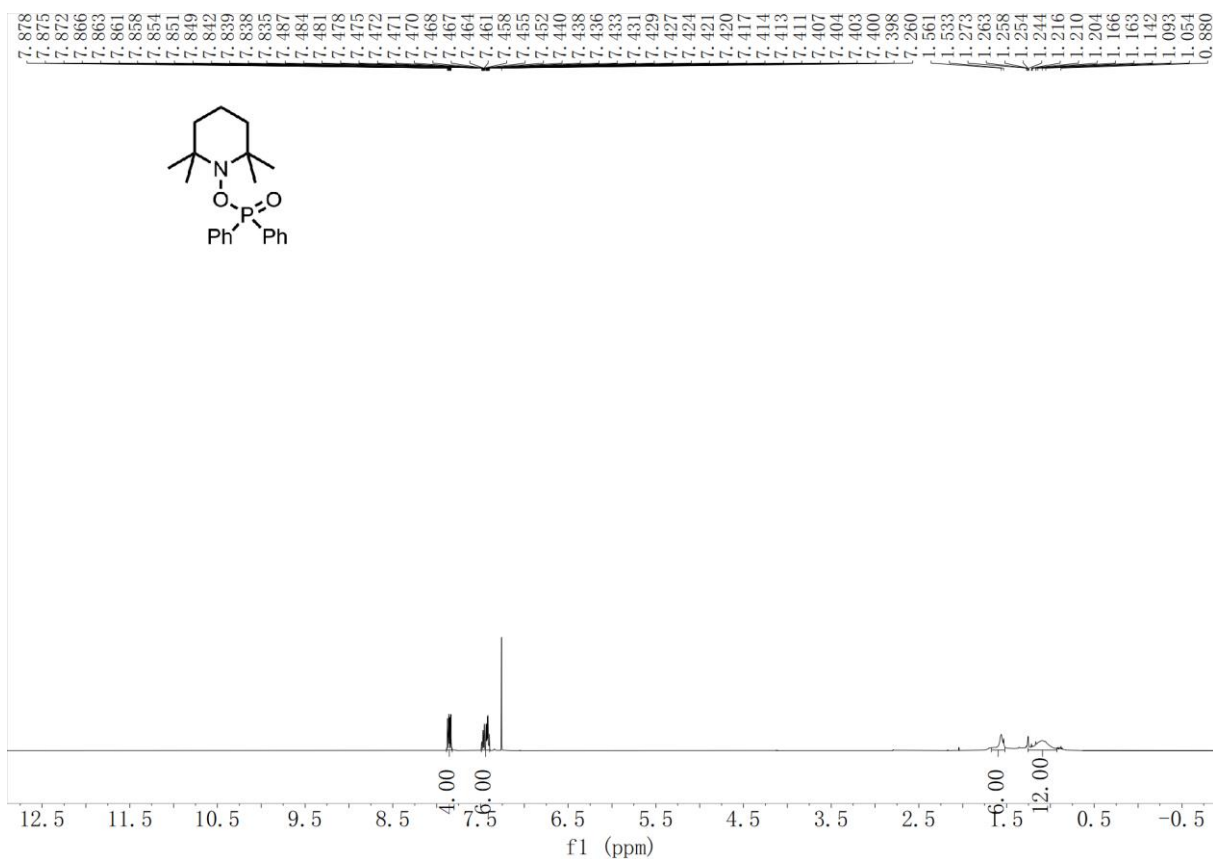

TEMPO-3a – <sup>13</sup>C NMR (126 MHz, CDCl<sub>3</sub>)

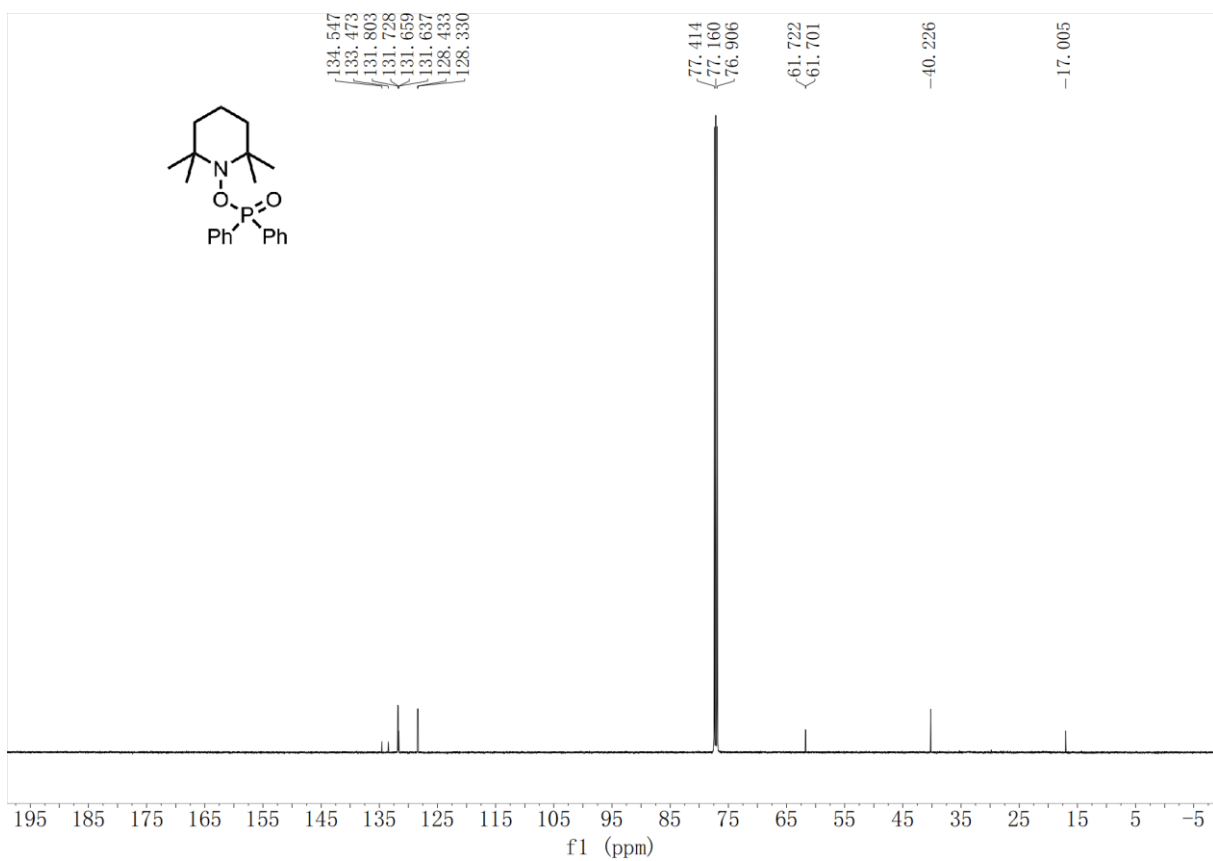

TEMPO-3a – <sup>31</sup>P NMR (202 MHz, CDCl<sub>3</sub>)

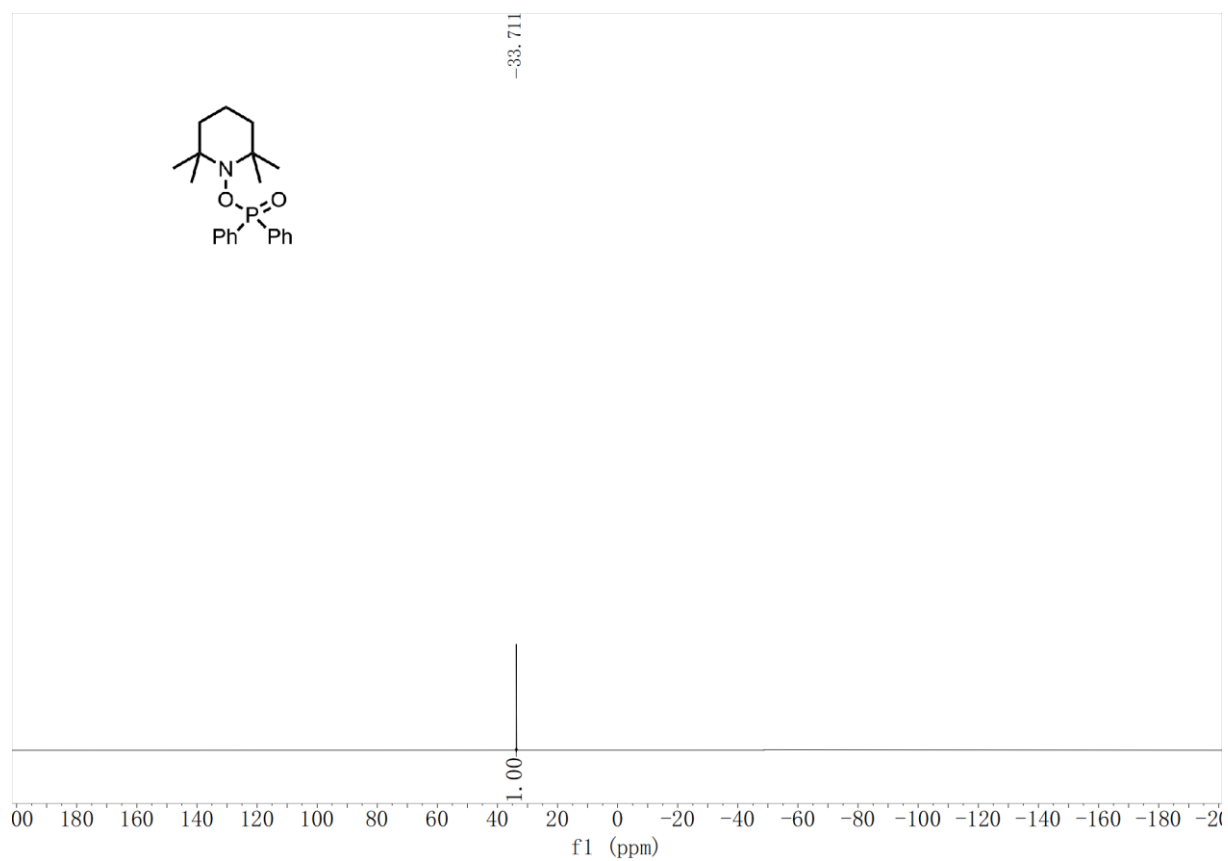

## 16. X-ray crystallography data

**4I** (CCDC 2281377) contains the supplementary crystallographic data for this paper. These data can be obtained free of charge from the Cambridge Crystallographic Data Centre.

Compound **4I** was dissolved in a dichloromethane (0.5 mL), and hexane (3.0 mL) were added. The sample was maintained at 4 °C for several days. Crystals were obtained through diffusion.

**5** (CCDC 2281378) contains the supplementary crystallographic data for this paper. These data can be obtained free of charge from the Cambridge Crystallographic Data Centre.

Compound **5** was dissolved in benzene-*d*<sub>6</sub> (3.0 mL). The sample was maintained at 4 °C for several days. Crystals were obtained through diffusion.

**8a** (CCDC 2310786) contains the supplementary crystallographic data for this paper. These data can be obtained free of charge from the Cambridge Crystallographic Data Centre.

Compound **8a** was dissolved in a dichloromethane (0.5 mL), and hexane (3.0 mL) were added. The sample was maintained at 4 °C for several days. Crystals were obtained through diffusion.

The X-ray diffraction data were collected at and 173 K on a Bruker SMART CCD diffractometer with MoK $\alpha$  radiation ( $\lambda = 0.71073 \text{ \AA}$ ). The diffraction data were corrected for absorption using the SADABS program. The structures were solved using SHELXS977 and refined by full matrix least-squares on F2 using SHELXL-2014 in the anisotropic approximation for all non-hydrogen atoms. The hydrogen atoms were introduced at calculated positions and not refined (riding model).



16.1 Crystallography data of 4I (CCDC 2281377)

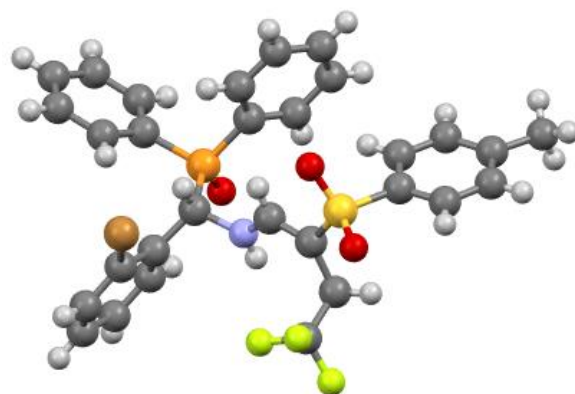

Figure S9. Structure of 4I (CCDC 2281377): ellipsoid contour probability: 50%.

**Table S2.** Crystal data and structure refinement for **4I** (CCDC 2281377).

|                                   |                                                                        |                                                                                 |
|-----------------------------------|------------------------------------------------------------------------|---------------------------------------------------------------------------------|
| Identification code               | <b>4I</b> (CCDC 2281377)                                               |                                                                                 |
| Empirical formula                 | C <sub>30</sub> H <sub>26</sub> Br F <sub>3</sub> N O <sub>3</sub> P S |                                                                                 |
| Formula weight                    | 648.46                                                                 |                                                                                 |
| Temperature                       | 120(2) K                                                               |                                                                                 |
| Wavelength                        | 0.71073 Å                                                              |                                                                                 |
| Crystal system, space group       | Triclinic, P -1                                                        |                                                                                 |
| Unit cell dimensions              | a = 10.2345(4) Å<br>b = 12.0047(4) Å<br>c = 13.9944(6) Å               | alpha = 112.2560(10) deg.<br>beta = 111.385(2) deg.<br>gamma = 90.4840(10) deg. |
| Volume                            | 1460.15(10) Å <sup>3</sup>                                             |                                                                                 |
| Z, Calculated density             | 2, 1.475 Mg/m <sup>3</sup>                                             |                                                                                 |
| Absorption coefficient            | 1.585 mm <sup>-1</sup>                                                 |                                                                                 |
| F(000)                            | 660                                                                    |                                                                                 |
| Crystal size                      | 0.200 x 0.120 x 0.120 mm                                               |                                                                                 |
| Theta range for data collection   | 1.945 to 30.122 deg.                                                   |                                                                                 |
| Limiting indices                  | -14 ≤ h ≤ 14, -14 ≤ k ≤ 16, -19 ≤ l ≤ 19                               |                                                                                 |
| Reflections collected / unique    | 79769 / 8606 [R(int) = 0.0478]                                         |                                                                                 |
| Completeness to theta = 25.242    | 100.0 %                                                                |                                                                                 |
| Absorption correction             | Semi-empirical from equivalents                                        |                                                                                 |
| Max. and min. transmission        | 0.7460 and 0.6389                                                      |                                                                                 |
| Refinement method                 | Full-matrix least-squares on F <sup>2</sup>                            |                                                                                 |
| Data / restraints / parameters    | 8606 / 0 / 362                                                         |                                                                                 |
| Goodness-of-fit on F <sup>2</sup> | 1.012                                                                  |                                                                                 |
| Final R indices [I > 2σ(I)]       | R1 = 0.0379, wR2 = 0.0870                                              |                                                                                 |
| R indices (all data)              | R1 = 0.0513, wR2 = 0.0961                                              |                                                                                 |
| Extinction coefficient            | n/a                                                                    |                                                                                 |
| Largest diff. peak and hole       | 1.611 and -1.708 e.Å <sup>-3</sup>                                     |                                                                                 |

**Table S3.** Atomic coordinates ( $\times 10^4$ ) and equivalent isotropic displacement parameters ( $\text{\AA}^2 \times 10^3$ ) for **4I** (CCDC 2281377). U(eq) is defined as one third of the trace of the orthogonalized  $U_{ij}$  tensor.

|       | x       | y       | z        | U(eq) |
|-------|---------|---------|----------|-------|
| S(1)  | 6361(1) | 1642(1) | 7239(1)  | 18(1) |
| O(1)  | 5486(1) | 522(1)  | 6327(1)  | 23(1) |
| O(2)  | 7721(1) | 1568(1) | 8007(1)  | 25(1) |
| C(1)  | 5390(2) | 2320(2) | 8069(1)  | 20(1) |
| C(2)  | 4078(2) | 2611(2) | 7578(2)  | 28(1) |
| C(3)  | 3317(2) | 3126(2) | 8230(2)  | 33(1) |
| C(4)  | 3856(2) | 3360(2) | 9369(2)  | 34(1) |
| C(5)  | 5146(3) | 3025(3) | 9825(2)  | 45(1) |
| C(6)  | 5928(2) | 2515(2) | 9188(2)  | 36(1) |
| C(7)  | 3066(3) | 3980(3) | 10093(2) | 51(1) |
| C(8)  | 6599(2) | 2673(2) | 6703(1)  | 17(1) |
| C(9)  | 5833(2) | 2346(2) | 5585(1)  | 18(1) |
| N(1)  | 5766(2) | 3040(1) | 5013(1)  | 19(1) |
| C(10) | 5101(2) | 2518(2) | 3786(1)  | 18(1) |
| P(1)  | 3338(1) | 2974(1) | 3311(1)  | 19(1) |
| O(3)  | 3382(2) | 4318(1) | 3660(1)  | 27(1) |
| C(11) | 2520(2) | 2101(2) | 1809(2)  | 24(1) |
| C(12) | 1230(2) | 2380(2) | 1239(2)  | 35(1) |
| C(13) | 524(3)  | 1750(3) | 84(2)    | 47(1) |
| C(14) | 1098(3) | 850(3)  | -509(2)  | 51(1) |
| C(15) | 2367(3) | 557(3)  | 45(2)    | 56(1) |
| C(16) | 3082(3) | 1173(2) | 1210(2)  | 42(1) |
| C(17) | 2321(2) | 2392(2) | 3885(2)  | 23(1) |
| C(18) | 2033(2) | 1146(2) | 3603(2)  | 32(1) |
| C(19) | 1273(3) | 724(2)  | 4075(2)  | 43(1) |
| C(20) | 762(3)  | 1544(3) | 4803(2)  | 46(1) |
| C(21) | 1005(3) | 2769(3) | 5056(2)  | 45(1) |
| C(22) | 1793(2) | 3207(2) | 4604(2)  | 33(1) |
| C(23) | 6109(2) | 2834(2) | 3315(1)  | 21(1) |
| C(24) | 7028(2) | 2055(2) | 2998(2)  | 26(1) |
| C(25) | 8007(2) | 2380(2) | 2635(2)  | 34(1) |
| C(26) | 8078(3) | 3500(2) | 2574(2)  | 36(1) |
| C(27) | 7178(3) | 4284(2) | 2870(2)  | 35(1) |
| C(28) | 6210(2) | 3958(2) | 3243(2)  | 28(1) |
| Br(1) | 6957(1) | 494(1)  | 3026(1)  | 42(1) |
| C(29) | 7603(2) | 3851(2) | 7531(1)  | 19(1) |
| C(30) | 9034(2) | 3876(2) | 7459(2)  | 30(1) |
| F(1)  | 8961(2) | 3902(2) | 6493(1)  | 48(1) |
| F(2)  | 9954(1) | 4884(1) | 8286(1)  | 44(1) |
| F(3)  | 9654(1) | 2924(1) | 7544(2)  | 49(1) |

**Table S4.** Selected bond lengths [Å] and angles [deg] for **4I** (CCDC 2281377).

---

---

Symmetry transformations used to generate equivalent atoms:

**Table S5.** Bond lengths [Å] and angles [deg] for **4I** (CCDC 2281377).

---

|              |            |
|--------------|------------|
| S(1)-O(1)    | 1.4437(13) |
| S(1)-O(2)    | 1.4441(13) |
| S(1)-C(8)    | 1.7273(17) |
| S(1)-C(1)    | 1.7708(18) |
| C(1)-C(6)    | 1.379(3)   |
| C(1)-C(2)    | 1.384(3)   |
| C(2)-C(3)    | 1.386(3)   |
| C(2)-H(2)    | 0.9500     |
| C(3)-C(4)    | 1.392(3)   |
| C(3)-H(3)    | 0.9500     |
| C(4)-C(5)    | 1.379(3)   |
| C(4)-C(7)    | 1.508(3)   |
| C(5)-C(6)    | 1.388(3)   |
| C(5)-H(5)    | 0.9500     |
| C(6)-H(6)    | 0.9500     |
| C(7)-H(7A)   | 0.9800     |
| C(7)-H(7B)   | 0.9800     |
| C(7)-H(7C)   | 0.9800     |
| C(8)-C(9)    | 1.361(2)   |
| C(8)-C(29)   | 1.505(2)   |
| C(9)-N(1)    | 1.344(2)   |
| C(9)-H(9)    | 0.9500     |
| N(1)-C(10)   | 1.460(2)   |
| N(1)-H(1)    | 0.8800     |
| C(10)-C(23)  | 1.523(2)   |
| C(10)-P(1)   | 1.8480(18) |
| C(10)-H(10)  | 1.0000     |
| P(1)-O(3)    | 1.4928(14) |
| P(1)-C(17)   | 1.7999(19) |
| P(1)-C(11)   | 1.8025(19) |
| C(11)-C(16)  | 1.389(3)   |
| C(11)-C(12)  | 1.390(3)   |
| C(12)-C(13)  | 1.385(3)   |
| C(12)-H(12)  | 0.9500     |
| C(13)-C(14)  | 1.374(4)   |
| C(13)-H(13)  | 0.9500     |
| C(14)-C(15)  | 1.375(4)   |
| C(14)-H(14)  | 0.9500     |
| C(15)-C(16)  | 1.395(3)   |
| C(15)-H(15)  | 0.9500     |
| C(16)-H(16)  | 0.9500     |
| C(17)-C(22)  | 1.387(3)   |
| C(17)-C(18)  | 1.394(3)   |
| C(18)-C(19)  | 1.385(3)   |
| C(18)-H(18)  | 0.9500     |
| C(19)-C(20)  | 1.385(4)   |
| C(19)-H(19)  | 0.9500     |
| C(20)-C(21)  | 1.373(4)   |
| C(20)-H(20)  | 0.9500     |
| C(21)-C(22)  | 1.395(3)   |
| C(21)-H(21)  | 0.9500     |
| C(22)-H(22)  | 0.9500     |
| C(23)-C(28)  | 1.396(3)   |
| C(23)-C(24)  | 1.401(3)   |
| C(24)-C(25)  | 1.389(3)   |
| C(24)-Br(1)  | 1.891(2)   |
| C(25)-C(26)  | 1.383(3)   |
| C(25)-H(25)  | 0.9500     |
| C(26)-C(27)  | 1.379(3)   |
| C(26)-H(26)  | 0.9500     |
| C(27)-C(28)  | 1.390(3)   |
| C(27)-H(27)  | 0.9500     |
| C(28)-H(28)  | 0.9500     |
| C(29)-C(30)  | 1.505(3)   |
| C(29)-H(29A) | 0.9900     |
| C(29)-H(29B) | 0.9900     |
| C(30)-F(3)   | 1.335(2)   |
| C(30)-F(1)   | 1.339(3)   |
| C(30)-F(2)   | 1.348(2)   |

|                   |            |
|-------------------|------------|
| O(1)-S(1)-O(2)    | 118.08(8)  |
| O(1)-S(1)-C(8)    | 109.41(8)  |
| O(2)-S(1)-C(8)    | 109.58(8)  |
| O(1)-S(1)-C(1)    | 107.99(8)  |
| O(2)-S(1)-C(1)    | 106.07(8)  |
| C(8)-S(1)-C(1)    | 104.86(8)  |
| C(6)-C(1)-C(2)    | 120.65(18) |
| C(6)-C(1)-S(1)    | 119.70(15) |
| C(2)-C(1)-S(1)    | 119.62(14) |
| C(1)-C(2)-C(3)    | 119.24(18) |
| C(1)-C(2)-H(2)    | 120.4      |
| C(3)-C(2)-H(2)    | 120.4      |
| C(2)-C(3)-C(4)    | 121.1(2)   |
| C(2)-C(3)-H(3)    | 119.5      |
| C(4)-C(3)-H(3)    | 119.5      |
| C(5)-C(4)-C(3)    | 118.35(19) |
| C(5)-C(4)-C(7)    | 120.5(2)   |
| C(3)-C(4)-C(7)    | 121.2(2)   |
| C(4)-C(5)-C(6)    | 121.4(2)   |
| C(4)-C(5)-H(5)    | 119.3      |
| C(6)-C(5)-H(5)    | 119.3      |
| C(1)-C(6)-C(5)    | 119.2(2)   |
| C(1)-C(6)-H(6)    | 120.4      |
| C(5)-C(6)-H(6)    | 120.4      |
| C(4)-C(7)-H(7A)   | 109.5      |
| C(4)-C(7)-H(7B)   | 109.5      |
| H(7A)-C(7)-H(7B)  | 109.5      |
| C(4)-C(7)-H(7C)   | 109.5      |
| H(7A)-C(7)-H(7C)  | 109.5      |
| H(7B)-C(7)-H(7C)  | 109.5      |
| C(9)-C(8)-C(29)   | 127.01(15) |
| C(9)-C(8)-S(1)    | 116.56(13) |
| C(29)-C(8)-S(1)   | 116.41(12) |
| N(1)-C(9)-C(8)    | 126.63(16) |
| N(1)-C(9)-H(9)    | 116.7      |
| C(8)-C(9)-H(9)    | 116.7      |
| C(9)-N(1)-C(10)   | 121.16(14) |
| C(9)-N(1)-H(1)    | 119.4      |
| C(10)-N(1)-H(1)   | 119.4      |
| N(1)-C(10)-C(23)  | 110.36(14) |
| N(1)-C(10)-P(1)   | 110.01(12) |
| C(23)-C(10)-P(1)  | 114.48(12) |
| N(1)-C(10)-H(10)  | 107.2      |
| C(23)-C(10)-H(10) | 107.2      |
| P(1)-C(10)-H(10)  | 107.2      |
| O(3)-P(1)-C(17)   | 110.86(9)  |
| O(3)-P(1)-C(11)   | 113.69(8)  |
| C(17)-P(1)-C(11)  | 105.89(9)  |
| O(3)-P(1)-C(10)   | 114.36(8)  |
| C(17)-P(1)-C(10)  | 105.51(8)  |
| C(11)-P(1)-C(10)  | 105.84(8)  |
| C(16)-C(11)-C(12) | 119.25(19) |
| C(16)-C(11)-P(1)  | 124.26(15) |
| C(12)-C(11)-P(1)  | 116.48(16) |
| C(13)-C(12)-C(11) | 120.3(2)   |
| C(13)-C(12)-H(12) | 119.8      |
| C(11)-C(12)-H(12) | 119.8      |
| C(14)-C(13)-C(12) | 120.2(2)   |
| C(14)-C(13)-H(13) | 119.9      |
| C(12)-C(13)-H(13) | 119.9      |
| C(13)-C(14)-C(15) | 120.1(2)   |
| C(13)-C(14)-H(14) | 119.9      |
| C(15)-C(14)-H(14) | 119.9      |
| C(14)-C(15)-C(16) | 120.3(3)   |
| C(14)-C(15)-H(15) | 119.8      |
| C(16)-C(15)-H(15) | 119.8      |
| C(11)-C(16)-C(15) | 119.8(2)   |
| C(11)-C(16)-H(16) | 120.1      |
| C(15)-C(16)-H(16) | 120.1      |
| C(22)-C(17)-C(18) | 119.73(19) |
| C(22)-C(17)-P(1)  | 118.79(16) |
| C(18)-C(17)-P(1)  | 121.47(15) |
| C(19)-C(18)-C(17) | 120.3(2)   |
| C(19)-C(18)-H(18) | 119.9      |

|                     |            |
|---------------------|------------|
| C(17)-C(18)-H(18)   | 119.9      |
| C(18)-C(19)-C(20)   | 119.7(2)   |
| C(18)-C(19)-H(19)   | 120.2      |
| C(20)-C(19)-H(19)   | 120.2      |
| C(21)-C(20)-C(19)   | 120.3(2)   |
| C(21)-C(20)-H(20)   | 119.9      |
| C(19)-C(20)-H(20)   | 119.9      |
| C(20)-C(21)-C(22)   | 120.6(2)   |
| C(20)-C(21)-H(21)   | 119.7      |
| C(22)-C(21)-H(21)   | 119.7      |
| C(17)-C(22)-C(21)   | 119.4(2)   |
| C(17)-C(22)-H(22)   | 120.3      |
| C(21)-C(22)-H(22)   | 120.3      |
| C(28)-C(23)-C(24)   | 116.99(17) |
| C(28)-C(23)-C(10)   | 120.71(17) |
| C(24)-C(23)-C(10)   | 122.20(16) |
| C(25)-C(24)-C(23)   | 121.99(19) |
| C(25)-C(24)-Br(1)   | 117.25(16) |
| C(23)-C(24)-Br(1)   | 120.76(14) |
| C(26)-C(25)-C(24)   | 119.5(2)   |
| C(26)-C(25)-H(25)   | 120.3      |
| C(24)-C(25)-H(25)   | 120.3      |
| C(25)-C(26)-C(27)   | 119.97(19) |
| C(25)-C(26)-H(26)   | 120.0      |
| C(27)-C(26)-H(26)   | 120.0      |
| C(26)-C(27)-C(28)   | 120.3(2)   |
| C(26)-C(27)-H(27)   | 119.9      |
| C(28)-C(27)-H(27)   | 119.9      |
| C(27)-C(28)-C(23)   | 121.3(2)   |
| C(27)-C(28)-H(28)   | 119.3      |
| C(23)-C(28)-H(28)   | 119.3      |
| C(8)-C(29)-C(30)    | 112.70(15) |
| C(8)-C(29)-H(29A)   | 109.1      |
| C(30)-C(29)-H(29A)  | 109.1      |
| C(8)-C(29)-H(29B)   | 109.1      |
| C(30)-C(29)-H(29B)  | 109.1      |
| H(29A)-C(29)-H(29B) | 107.8      |
| F(3)-C(30)-F(1)     | 106.80(19) |
| F(3)-C(30)-F(2)     | 106.34(17) |
| F(1)-C(30)-F(2)     | 105.96(17) |
| F(3)-C(30)-C(29)    | 113.79(17) |
| F(1)-C(30)-C(29)    | 112.25(16) |
| F(2)-C(30)-C(29)    | 111.20(17) |

---

Symmetry transformations used to generate equivalent atoms:

**Table S6.** Anisotropic displacement parameters ( $\text{\AA}^2 \times 10^3$ ) for **4I** (CCDC 2281377).

The anisotropic displacement factor exponent takes the form:

$$-2 \pi^2 [ h^2 a^{*2} U_{11} + \dots + 2 h k a^* b^* U_{12} ]$$

|       | U11   | U22   | U33   | U23   | U13   | U12   |
|-------|-------|-------|-------|-------|-------|-------|
| S(1)  | 20(1) | 18(1) | 16(1) | 8(1)  | 6(1)  | 4(1)  |
| O(1)  | 29(1) | 19(1) | 20(1) | 7(1)  | 8(1)  | 0(1)  |
| O(2)  | 24(1) | 28(1) | 22(1) | 13(1) | 5(1)  | 9(1)  |
| C(1)  | 22(1) | 20(1) | 19(1) | 8(1)  | 9(1)  | 2(1)  |
| C(2)  | 28(1) | 37(1) | 26(1) | 18(1) | 13(1) | 12(1) |
| C(3)  | 33(1) | 40(1) | 40(1) | 24(1) | 23(1) | 15(1) |
| C(4)  | 40(1) | 35(1) | 37(1) | 14(1) | 26(1) | 7(1)  |
| C(5)  | 42(1) | 74(2) | 21(1) | 17(1) | 16(1) | 13(1) |
| C(6)  | 29(1) | 60(2) | 22(1) | 19(1) | 10(1) | 12(1) |
| C(7)  | 62(2) | 55(2) | 55(2) | 22(1) | 45(2) | 18(1) |
| C(8)  | 17(1) | 18(1) | 17(1) | 8(1)  | 7(1)  | 3(1)  |
| C(9)  | 18(1) | 18(1) | 17(1) | 7(1)  | 8(1)  | 4(1)  |
| N(1)  | 23(1) | 17(1) | 14(1) | 5(1)  | 5(1)  | 2(1)  |
| C(10) | 19(1) | 17(1) | 15(1) | 6(1)  | 6(1)  | 1(1)  |
| P(1)  | 21(1) | 17(1) | 17(1) | 7(1)  | 6(1)  | 4(1)  |
| O(3)  | 33(1) | 18(1) | 26(1) | 9(1)  | 8(1)  | 7(1)  |
| C(11) | 23(1) | 26(1) | 18(1) | 9(1)  | 5(1)  | 1(1)  |
| C(12) | 27(1) | 43(1) | 28(1) | 16(1) | 3(1)  | 7(1)  |
| C(13) | 34(1) | 62(2) | 30(1) | 21(1) | -5(1) | 1(1)  |
| C(14) | 48(2) | 59(2) | 20(1) | 7(1)  | -3(1) | -9(1) |
| C(15) | 54(2) | 60(2) | 23(1) | -5(1) | 6(1)  | 7(1)  |
| C(16) | 36(1) | 45(1) | 23(1) | 1(1)  | 2(1)  | 11(1) |
| C(17) | 19(1) | 26(1) | 23(1) | 11(1) | 8(1)  | 6(1)  |
| C(18) | 32(1) | 29(1) | 46(1) | 19(1) | 22(1) | 9(1)  |
| C(19) | 39(1) | 45(1) | 60(2) | 31(1) | 25(1) | 5(1)  |
| C(20) | 31(1) | 72(2) | 42(1) | 27(1) | 18(1) | -3(1) |
| C(21) | 37(1) | 60(2) | 36(1) | 7(1)  | 24(1) | 4(1)  |
| C(22) | 30(1) | 34(1) | 29(1) | 5(1)  | 15(1) | 6(1)  |
| C(23) | 22(1) | 21(1) | 15(1) | 5(1)  | 6(1)  | -2(1) |
| C(24) | 25(1) | 23(1) | 28(1) | 7(1)  | 12(1) | -2(1) |
| C(25) | 30(1) | 33(1) | 36(1) | 6(1)  | 19(1) | -3(1) |
| C(26) | 39(1) | 40(1) | 32(1) | 12(1) | 19(1) | -8(1) |
| C(27) | 48(1) | 31(1) | 33(1) | 15(1) | 19(1) | -3(1) |
| C(28) | 36(1) | 25(1) | 26(1) | 13(1) | 14(1) | 2(1)  |
| Br(1) | 33(1) | 27(1) | 79(1) | 24(1) | 35(1) | 11(1) |
| C(29) | 18(1) | 19(1) | 19(1) | 7(1)  | 7(1)  | 2(1)  |
| C(30) | 19(1) | 31(1) | 39(1) | 14(1) | 10(1) | 2(1)  |
| F(1)  | 35(1) | 73(1) | 50(1) | 27(1) | 30(1) | 8(1)  |
| F(2)  | 24(1) | 38(1) | 55(1) | 18(1) | 3(1)  | -9(1) |
| F(3)  | 22(1) | 41(1) | 89(1) | 31(1) | 23(1) | 13(1) |



**Table S7.** Hydrogen coordinates ( $\times 10^4$ ) and isotropic displacement parameters ( $\text{\AA}^2 \times 10^3$ ) for **4I** (CCDC 2281377).

|        | x    | y    | z     | U(eq) |
|--------|------|------|-------|-------|
| H(2)   | 3702 | 2459 | 6803  | 34    |
| H(3)   | 2413 | 3324 | 7895  | 39    |
| H(5)   | 5507 | 3145 | 10593 | 54    |
| H(6)   | 6823 | 2303 | 9519  | 43    |
| H(7A)  | 3286 | 3708 | 10704 | 76    |
| H(7B)  | 2039 | 3767 | 9635  | 76    |
| H(7C)  | 3359 | 4867 | 10411 | 76    |
| H(9)   | 5291 | 1545 | 5166  | 21    |
| H(1)   | 6128 | 3823 | 5385  | 23    |
| H(10)  | 4938 | 1610 | 3521  | 21    |
| H(12)  | 831  | 3006 | 1643  | 41    |
| H(13)  | -361 | 1941 | -300  | 56    |
| H(14)  | 619  | 430  | -1302 | 61    |
| H(15)  | 2758 | -69  | -367  | 67    |
| H(16)  | 3950 | 959  | 1592  | 50    |
| H(18)  | 2358 | 583  | 3085  | 39    |
| H(19)  | 1104 | -123 | 3901  | 52    |
| H(20)  | 242  | 1258 | 5129  | 55    |
| H(21)  | 632  | 3323 | 5544  | 54    |
| H(22)  | 1967 | 4057 | 4788  | 39    |
| H(25)  | 8623 | 1836 | 2430  | 41    |
| H(26)  | 8746 | 3731 | 2328  | 44    |
| H(27)  | 7220 | 5049 | 2820  | 43    |
| H(28)  | 5605 | 4510 | 3453  | 33    |
| H(29A) | 7735 | 3971 | 8302  | 23    |
| H(29B) | 7172 | 4538 | 7388  | 23    |

**Table S8.** Selected torsion angles [deg] for **4I** (CCDC 2281377).

---

---

Symmetry transformations used to generate equivalent atoms:

**Table S9.** Torsion angles [deg] for **4I** (CCDC 2281377).

|                         |             |
|-------------------------|-------------|
| O(1)-S(1)-C(1)-C(6)     | 119.72(18)  |
| O(2)-S(1)-C(1)-C(6)     | -7.77(19)   |
| C(8)-S(1)-C(1)-C(6)     | -123.70(18) |
| O(1)-S(1)-C(1)-C(2)     | -58.15(17)  |
| O(2)-S(1)-C(1)-C(2)     | 174.37(15)  |
| C(8)-S(1)-C(1)-C(2)     | 58.44(17)   |
| C(6)-C(1)-C(2)-C(3)     | 1.3(3)      |
| S(1)-C(1)-C(2)-C(3)     | 179.16(16)  |
| C(1)-C(2)-C(3)-C(4)     | 0.3(3)      |
| C(2)-C(3)-C(4)-C(5)     | -2.3(4)     |
| C(2)-C(3)-C(4)-C(7)     | 176.8(2)    |
| C(3)-C(4)-C(5)-C(6)     | 2.8(4)      |
| C(7)-C(4)-C(5)-C(6)     | -176.4(3)   |
| C(2)-C(1)-C(6)-C(5)     | -0.9(4)     |
| S(1)-C(1)-C(6)-C(5)     | -178.7(2)   |
| C(4)-C(5)-C(6)-C(1)     | -1.2(4)     |
| O(1)-S(1)-C(8)-C(9)     | 7.13(16)    |
| O(2)-S(1)-C(8)-C(9)     | 138.06(13)  |
| C(1)-S(1)-C(8)-C(9)     | -108.47(14) |
| O(1)-S(1)-C(8)-C(29)    | -174.38(12) |
| O(2)-S(1)-C(8)-C(29)    | -43.45(15)  |
| C(1)-S(1)-C(8)-C(29)    | 70.01(14)   |
| C(29)-C(8)-C(9)-N(1)    | -3.9(3)     |
| S(1)-C(8)-C(9)-N(1)     | 174.40(14)  |
| C(8)-C(9)-N(1)-C(10)    | 169.50(16)  |
| C(9)-N(1)-C(10)-C(23)   | -127.70(17) |
| C(9)-N(1)-C(10)-P(1)    | 105.04(16)  |
| N(1)-C(10)-P(1)-O(3)    | 62.42(14)   |
| C(23)-C(10)-P(1)-O(3)   | -62.51(14)  |
| N(1)-C(10)-P(1)-C(17)   | -59.67(13)  |
| C(23)-C(10)-P(1)-C(17)  | 175.40(12)  |
| N(1)-C(10)-P(1)-C(11)   | -171.64(11) |
| C(23)-C(10)-P(1)-C(11)  | 63.43(14)   |
| O(3)-P(1)-C(11)-C(16)   | 134.0(2)    |
| C(17)-P(1)-C(11)-C(16)  | -104.1(2)   |
| C(10)-P(1)-C(11)-C(16)  | 7.6(2)      |
| O(3)-P(1)-C(11)-C(12)   | -47.28(19)  |
| C(17)-P(1)-C(11)-C(12)  | 74.67(18)   |
| C(10)-P(1)-C(11)-C(12)  | -173.63(16) |
| C(16)-C(11)-C(12)-C(13) | -0.9(3)     |
| P(1)-C(11)-C(12)-C(13)  | -179.68(19) |
| C(11)-C(12)-C(13)-C(14) | -0.5(4)     |
| C(12)-C(13)-C(14)-C(15) | 1.1(5)      |
| C(13)-C(14)-C(15)-C(16) | -0.3(5)     |
| C(12)-C(11)-C(16)-C(15) | 1.6(4)      |
| P(1)-C(11)-C(16)-C(15)  | -179.7(2)   |
| C(14)-C(15)-C(16)-C(11) | -1.0(5)     |
| O(3)-P(1)-C(17)-C(22)   | -3.82(18)   |
| C(11)-P(1)-C(17)-C(22)  | -127.57(16) |
| C(10)-P(1)-C(17)-C(22)  | 120.50(16)  |
| O(3)-P(1)-C(17)-C(18)   | 174.81(16)  |
| C(11)-P(1)-C(17)-C(18)  | 51.05(18)   |
| C(10)-P(1)-C(17)-C(18)  | -60.88(18)  |
| C(22)-C(17)-C(18)-C(19) | -2.8(3)     |
| P(1)-C(17)-C(18)-C(19)  | 178.63(18)  |
| C(17)-C(18)-C(19)-C(20) | 2.0(4)      |
| C(18)-C(19)-C(20)-C(21) | 0.0(4)      |
| C(19)-C(20)-C(21)-C(22) | -1.4(4)     |
| C(18)-C(17)-C(22)-C(21) | 1.4(3)      |
| P(1)-C(17)-C(22)-C(21)  | -179.93(18) |
| C(20)-C(21)-C(22)-C(17) | 0.6(4)      |
| N(1)-C(10)-C(23)-C(28)  | -82.9(2)    |
| P(1)-C(10)-C(23)-C(28)  | 41.8(2)     |
| N(1)-C(10)-C(23)-C(24)  | 93.3(2)     |
| P(1)-C(10)-C(23)-C(24)  | -141.92(15) |
| C(28)-C(23)-C(24)-C(25) | 0.5(3)      |
| C(10)-C(23)-C(24)-C(25) | -175.93(18) |
| C(28)-C(23)-C(24)-Br(1) | -178.47(14) |
| C(10)-C(23)-C(24)-Br(1) | 5.1(2)      |
| C(23)-C(24)-C(25)-C(26) | -0.5(3)     |

|                         |             |
|-------------------------|-------------|
| Br(1)-C(24)-C(25)-C(26) | 178.50(17)  |
| C(24)-C(25)-C(26)-C(27) | -0.1(3)     |
| C(25)-C(26)-C(27)-C(28) | 0.7(3)      |
| C(26)-C(27)-C(28)-C(23) | -0.8(3)     |
| C(24)-C(23)-C(28)-C(27) | 0.2(3)      |
| C(10)-C(23)-C(28)-C(27) | 176.60(18)  |
| C(9)-C(8)-C(29)-C(30)   | -79.0(2)    |
| S(1)-C(8)-C(29)-C(30)   | 102.71(16)  |
| C(8)-C(29)-C(30)-F(3)   | -53.4(2)    |
| C(8)-C(29)-C(30)-F(1)   | 68.0(2)     |
| C(8)-C(29)-C(30)-F(2)   | -173.45(16) |

---

Symmetry transformations used to generate equivalent atoms:

**Table S10.** Hydrogen bonds for **4I** (CCDC 2281377) [Å and deg.].

---

| D-H...A | d(D-H) | d(H...A) | d(D...A) | <(DHA) |
|---------|--------|----------|----------|--------|
|---------|--------|----------|----------|--------|

16.2 Crystallography data of 5 (CCDC 2281378)

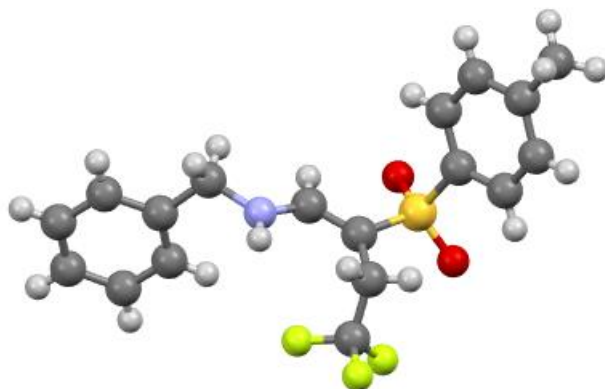

Figure S10. Structure of 5 (CCDC 2281378): ellipsoid contour probability: 50%.

**Table S11.** Crystal data and structure refinement for **5** (CCDC 2281378).

|                                   |                                                                                                                         |
|-----------------------------------|-------------------------------------------------------------------------------------------------------------------------|
| Identification code               | <b>5</b> (CCDC 2281378)                                                                                                 |
| Empirical formula                 | C18 H18 F3 N O2 S                                                                                                       |
| Formula weight                    | 369.39                                                                                                                  |
| Temperature                       | 173(2) K                                                                                                                |
| Wavelength                        | 0.71073 Å                                                                                                               |
| Crystal system, space group       | Monoclinic, P 21/c                                                                                                      |
| Unit cell dimensions              | a = 17.628(2) Å    alpha = 90 deg.<br>b = 7.0992(10) Å    beta = 92.821(7) deg.<br>c = 13.6449(16) Å    gamma = 90 deg. |
| Volume                            | 1705.5(4) Å <sup>3</sup>                                                                                                |
| Z, Calculated density             | 4, 1.439 Mg/m <sup>3</sup>                                                                                              |
| Absorption coefficient            | 0.232 mm <sup>-1</sup>                                                                                                  |
| F(000)                            | 768                                                                                                                     |
| Crystal size                      | 0.200 x 0.150 x 0.100 mm                                                                                                |
| Theta range for data collection   | 1.157 to 27.962 deg.                                                                                                    |
| Limiting indices                  | -22<=h<=23, -9<=k<=9, -17<=l<=15                                                                                        |
| Reflections collected / unique    | 19385 / 4081 [R(int) = 0.0662]                                                                                          |
| Completeness to theta = 25.242    | 100.0 %                                                                                                                 |
| Absorption correction             | Semi-empirical from equivalents                                                                                         |
| Max. and min. transmission        | 0.7456 and 0.6067                                                                                                       |
| Refinement method                 | Full-matrix least-squares on F <sup>2</sup>                                                                             |
| Data / restraints / parameters    | 4081 / 0 / 227                                                                                                          |
| Goodness-of-fit on F <sup>2</sup> | 1.009                                                                                                                   |
| Final R indices [I>2sigma(I)]     | R1 = 0.0440, wR2 = 0.0957                                                                                               |
| R indices (all data)              | R1 = 0.0796, wR2 = 0.1115                                                                                               |
| Extinction coefficient            | n/a                                                                                                                     |
| Largest diff. peak and hole       | 0.368 and -0.314 e.Å <sup>-3</sup>                                                                                      |

**Table S12.** Atomic coordinates ( $\times 10^4$ ) and equivalent isotropic displacement parameters ( $\text{\AA}^2 \times 10^3$ ) for **5** (CCDC 2281378).  $U(\text{eq})$  is defined as one third of the trace of the orthogonalized  $U_{ij}$  tensor.

|       | x       | y        | z       | U(eq) |
|-------|---------|----------|---------|-------|
| S(1)  | 2166(1) | 6380(1)  | 6358(1) | 25(1) |
| O(1)  | 1944(1) | 4467(2)  | 6537(1) | 35(1) |
| O(2)  | 2711(1) | 7277(2)  | 7034(1) | 33(1) |
| C(1)  | 1325(1) | 7740(3)  | 6358(1) | 24(1) |
| C(2)  | 623(1)  | 6852(3)  | 6218(2) | 32(1) |
| C(3)  | -35(1)  | 7919(4)  | 6200(2) | 37(1) |
| C(4)  | -11(1)  | 9866(4)  | 6323(2) | 34(1) |
| C(5)  | 698(1)  | 10712(3) | 6465(2) | 36(1) |
| C(6)  | 1359(1) | 9670(3)  | 6474(2) | 32(1) |
| C(7)  | -731(1) | 11010(4) | 6279(2) | 50(1) |
| C(8)  | 2485(1) | 6557(3)  | 5183(1) | 24(1) |
| C(9)  | 2063(1) | 5437(3)  | 4393(2) | 27(1) |
| C(10) | 2448(1) | 3637(3)  | 4127(2) | 32(1) |
| F(1)  | 3163(1) | 3931(2)  | 3865(1) | 54(1) |
| F(2)  | 2495(1) | 2377(2)  | 4849(1) | 48(1) |
| F(3)  | 2084(1) | 2790(2)  | 3370(1) | 59(1) |
| N(1)  | 3328(1) | 8262(3)  | 4157(1) | 29(1) |
| C(11) | 3040(1) | 7825(3)  | 5018(1) | 25(1) |
| C(12) | 3919(1) | 9664(3)  | 4045(2) | 30(1) |
| C(13) | 4687(1) | 8860(3)  | 3813(1) | 26(1) |
| C(14) | 4915(1) | 7056(3)  | 4074(2) | 34(1) |
| C(15) | 5640(1) | 6415(4)  | 3870(2) | 41(1) |
| C(16) | 6135(1) | 7574(4)  | 3402(2) | 41(1) |
| C(17) | 5912(1) | 9358(4)  | 3132(2) | 38(1) |
| C(18) | 5192(1) | 10011(3) | 3339(2) | 32(1) |



**Table S13.** Selected bond lengths [Å] and angles [deg] for **5** (CCDC 2281378).

---

---

Symmetry transformations used to generate equivalent atoms:

**Table S14.** Bond lengths [Å] and angles [deg] for **5** (CCDC 2281378).

---

|                 |            |
|-----------------|------------|
| S(1)-O(1)       | 1.4381(16) |
| S(1)-O(2)       | 1.4476(15) |
| S(1)-C(8)       | 1.7282(19) |
| S(1)-C(1)       | 1.769(2)   |
| C(1)-C(6)       | 1.380(3)   |
| C(1)-C(2)       | 1.393(3)   |
| C(2)-C(3)       | 1.385(3)   |
| C(2)-H(2)       | 0.9500     |
| C(3)-C(4)       | 1.392(3)   |
| C(3)-H(3)       | 0.9500     |
| C(4)-C(5)       | 1.392(3)   |
| C(4)-C(7)       | 1.505(3)   |
| C(5)-C(6)       | 1.379(3)   |
| C(5)-H(5)       | 0.9500     |
| C(6)-H(6)       | 0.9500     |
| C(7)-H(7A)      | 0.9800     |
| C(7)-H(7B)      | 0.9800     |
| C(7)-H(7C)      | 0.9800     |
| C(8)-C(11)      | 1.357(3)   |
| C(8)-C(9)       | 1.506(3)   |
| C(9)-C(10)      | 1.500(3)   |
| C(9)-H(9A)      | 0.9900     |
| C(9)-H(9B)      | 0.9900     |
| C(10)-F(2)      | 1.330(3)   |
| C(10)-F(3)      | 1.332(2)   |
| C(10)-F(1)      | 1.343(3)   |
| N(1)-C(11)      | 1.340(2)   |
| N(1)-C(12)      | 1.454(3)   |
| N(1)-H(1)       | 0.8800     |
| C(11)-H(11)     | 0.9500     |
| C(12)-C(13)     | 1.517(3)   |
| C(12)-H(12A)    | 0.9900     |
| C(12)-H(12B)    | 0.9900     |
| C(13)-C(14)     | 1.384(3)   |
| C(13)-C(18)     | 1.391(3)   |
| C(14)-C(15)     | 1.398(3)   |
| C(14)-H(14)     | 0.9500     |
| C(15)-C(16)     | 1.379(3)   |
| C(15)-H(15)     | 0.9500     |
| C(16)-C(17)     | 1.371(4)   |
| C(16)-H(16)     | 0.9500     |
| C(17)-C(18)     | 1.394(3)   |
| C(17)-H(17)     | 0.9500     |
| C(18)-H(18)     | 0.9500     |
| O(1)-S(1)-O(2)  | 119.01(9)  |
| O(1)-S(1)-C(8)  | 109.30(10) |
| O(2)-S(1)-C(8)  | 108.86(9)  |
| O(1)-S(1)-C(1)  | 106.26(9)  |
| O(2)-S(1)-C(1)  | 106.86(9)  |
| C(8)-S(1)-C(1)  | 105.72(9)  |
| C(6)-C(1)-C(2)  | 119.90(19) |
| C(6)-C(1)-S(1)  | 120.65(16) |
| C(2)-C(1)-S(1)  | 119.44(16) |
| C(3)-C(2)-C(1)  | 119.5(2)   |
| C(3)-C(2)-H(2)  | 120.2      |
| C(1)-C(2)-H(2)  | 120.2      |
| C(2)-C(3)-C(4)  | 121.3(2)   |
| C(2)-C(3)-H(3)  | 119.3      |
| C(4)-C(3)-H(3)  | 119.3      |
| C(5)-C(4)-C(3)  | 117.8(2)   |
| C(5)-C(4)-C(7)  | 121.5(2)   |
| C(3)-C(4)-C(7)  | 120.7(2)   |
| C(6)-C(5)-C(4)  | 121.5(2)   |
| C(6)-C(5)-H(5)  | 119.3      |
| C(4)-C(5)-H(5)  | 119.3      |
| C(5)-C(6)-C(1)  | 119.9(2)   |
| C(5)-C(6)-H(6)  | 120.0      |
| C(1)-C(6)-H(6)  | 120.0      |
| C(4)-C(7)-H(7A) | 109.5      |

|                     |            |
|---------------------|------------|
| C(4)-C(7)-H(7B)     | 109.5      |
| H(7A)-C(7)-H(7B)    | 109.5      |
| C(4)-C(7)-H(7C)     | 109.5      |
| H(7A)-C(7)-H(7C)    | 109.5      |
| H(7B)-C(7)-H(7C)    | 109.5      |
| C(11)-C(8)-C(9)     | 124.47(17) |
| C(11)-C(8)-S(1)     | 118.19(15) |
| C(9)-C(8)-S(1)      | 116.98(14) |
| C(10)-C(9)-C(8)     | 114.21(17) |
| C(10)-C(9)-H(9A)    | 108.7      |
| C(8)-C(9)-H(9A)     | 108.7      |
| C(10)-C(9)-H(9B)    | 108.7      |
| C(8)-C(9)-H(9B)     | 108.7      |
| H(9A)-C(9)-H(9B)    | 107.6      |
| F(2)-C(10)-F(3)     | 106.32(19) |
| F(2)-C(10)-F(1)     | 106.01(18) |
| F(3)-C(10)-F(1)     | 106.62(17) |
| F(2)-C(10)-C(9)     | 114.01(17) |
| F(3)-C(10)-C(9)     | 111.46(18) |
| F(1)-C(10)-C(9)     | 111.93(18) |
| C(11)-N(1)-C(12)    | 123.66(17) |
| C(11)-N(1)-H(1)     | 118.2      |
| C(12)-N(1)-H(1)     | 118.2      |
| N(1)-C(11)-C(8)     | 127.35(19) |
| N(1)-C(11)-H(11)    | 116.3      |
| C(8)-C(11)-H(11)    | 116.3      |
| N(1)-C(12)-C(13)    | 114.59(18) |
| N(1)-C(12)-H(12A)   | 108.6      |
| C(13)-C(12)-H(12A)  | 108.6      |
| N(1)-C(12)-H(12B)   | 108.6      |
| C(13)-C(12)-H(12B)  | 108.6      |
| H(12A)-C(12)-H(12B) | 107.6      |
| C(14)-C(13)-C(18)   | 118.63(19) |
| C(14)-C(13)-C(12)   | 123.00(19) |
| C(18)-C(13)-C(12)   | 118.34(19) |
| C(13)-C(14)-C(15)   | 120.5(2)   |
| C(13)-C(14)-H(14)   | 119.8      |
| C(15)-C(14)-H(14)   | 119.8      |
| C(16)-C(15)-C(14)   | 120.2(2)   |
| C(16)-C(15)-H(15)   | 119.9      |
| C(14)-C(15)-H(15)   | 119.9      |
| C(17)-C(16)-C(15)   | 119.8(2)   |
| C(17)-C(16)-H(16)   | 120.1      |
| C(15)-C(16)-H(16)   | 120.1      |
| C(16)-C(17)-C(18)   | 120.3(2)   |
| C(16)-C(17)-H(17)   | 119.8      |
| C(18)-C(17)-H(17)   | 119.8      |
| C(13)-C(18)-C(17)   | 120.6(2)   |
| C(13)-C(18)-H(18)   | 119.7      |
| C(17)-C(18)-H(18)   | 119.7      |

---

Symmetry transformations used to generate equivalent atoms:

**Table S15.** Anisotropic displacement parameters ( $\text{Å}^2 \times 10^3$ ) for **5** (CCDC 2281378).

The anisotropic displacement factor exponent takes the form:

$$-2 \pi^2 [ h^2 a^2 U_{11} + \dots + 2 h k a^* b^* U_{12} ]$$

|       | U11   | U22   | U33   | U23    | U13    | U12    |
|-------|-------|-------|-------|--------|--------|--------|
| S(1)  | 26(1) | 31(1) | 20(1) | 3(1)   | 2(1)   | 2(1)   |
| O(1)  | 39(1) | 32(1) | 34(1) | 9(1)   | 8(1)   | 5(1)   |
| O(2)  | 31(1) | 49(1) | 19(1) | 2(1)   | -2(1)  | -1(1)  |
| C(1)  | 26(1) | 29(1) | 18(1) | 1(1)   | 6(1)   | 0(1)   |
| C(2)  | 32(1) | 32(1) | 33(1) | 2(1)   | 4(1)   | 0(1)   |
| C(3)  | 25(1) | 49(2) | 38(1) | 2(1)   | 4(1)   | -1(1)  |
| C(4)  | 38(1) | 46(2) | 19(1) | 3(1)   | 6(1)   | 12(1)  |
| C(5)  | 47(1) | 30(1) | 33(1) | 0(1)   | 8(1)   | 8(1)   |
| C(6)  | 35(1) | 34(1) | 27(1) | -1(1)  | 3(1)   | -2(1)  |
| C(7)  | 48(1) | 67(2) | 34(1) | 5(1)   | 5(1)   | 26(1)  |
| C(8)  | 23(1) | 30(1) | 18(1) | -1(1)  | 2(1)   | 4(1)   |
| C(9)  | 26(1) | 32(1) | 23(1) | 0(1)   | 0(1)   | 2(1)   |
| C(10) | 39(1) | 31(1) | 27(1) | -2(1)  | 3(1)   | 0(1)   |
| F(1)  | 49(1) | 45(1) | 70(1) | -7(1)  | 27(1)  | 9(1)   |
| F(2)  | 71(1) | 33(1) | 41(1) | 4(1)   | 9(1)   | 10(1)  |
| F(3)  | 83(1) | 51(1) | 43(1) | -24(1) | -13(1) | 3(1)   |
| N(1)  | 28(1) | 39(1) | 19(1) | -3(1)  | 4(1)   | -4(1)  |
| C(11) | 24(1) | 30(1) | 20(1) | -1(1)  | 0(1)   | 6(1)   |
| C(12) | 33(1) | 31(1) | 26(1) | 2(1)   | 6(1)   | 0(1)   |
| C(13) | 26(1) | 34(1) | 18(1) | 0(1)   | 1(1)   | -1(1)  |
| C(14) | 37(1) | 39(1) | 27(1) | 7(1)   | 5(1)   | 2(1)   |
| C(15) | 42(1) | 45(2) | 36(1) | 2(1)   | 0(1)   | 13(1)  |
| C(16) | 30(1) | 64(2) | 29(1) | -9(1)  | 1(1)   | 5(1)   |
| C(17) | 29(1) | 58(2) | 26(1) | -7(1)  | 7(1)   | -12(1) |
| C(18) | 35(1) | 37(1) | 24(1) | -1(1)  | 1(1)   | -4(1)  |

**Table S16.** Hydrogen coordinates ( $\times 10^4$ ) and isotropic displacement parameters ( $\text{\AA}^2 \times 10^3$ ) for **5** (CCDC 2281378).

|        | x     | y     | z    | U(eq) |
|--------|-------|-------|------|-------|
| H(2)   | 596   | 5524  | 6135 | 39    |
| H(3)   | -513  | 7310  | 6102 | 45    |
| H(5)   | 728   | 12036 | 6558 | 44    |
| H(6)   | 1837  | 10280 | 6559 | 38    |
| H(7A)  | -918  | 11138 | 5594 | 75    |
| H(7B)  | -627  | 12261 | 6557 | 75    |
| H(7C)  | -1115 | 10375 | 6655 | 75    |
| H(9A)  | 1550  | 5137  | 4615 | 33    |
| H(9B)  | 1998  | 6229  | 3798 | 33    |
| H(1)   | 3149  | 7667  | 3628 | 34    |
| H(11)  | 3248  | 8477  | 5577 | 30    |
| H(12A) | 3978  | 10402 | 4660 | 36    |
| H(12B) | 3752  | 10542 | 3514 | 36    |
| H(14)  | 4577  | 6248  | 4395 | 41    |
| H(15)  | 5793  | 5176  | 4054 | 49    |
| H(16)  | 6628  | 7138  | 3266 | 49    |
| H(17)  | 6251  | 10152 | 2802 | 45    |
| H(18)  | 5045  | 11254 | 3155 | 38    |

**Table S17.** Selected torsion angles [deg] for **5** (CCDC 2281378).

---

---

Symmetry transformations used to generate equivalent atoms:

**Table S18.** Torsion angles [deg] for **5** (CCDC 2281378).

---

|                         |             |
|-------------------------|-------------|
| O(1)-S(1)-C(1)-C(6)     | 162.16(16)  |
| O(2)-S(1)-C(1)-C(6)     | 34.12(19)   |
| C(8)-S(1)-C(1)-C(6)     | -81.75(18)  |
| O(1)-S(1)-C(1)-C(2)     | -19.26(19)  |
| O(2)-S(1)-C(1)-C(2)     | -147.30(16) |
| C(8)-S(1)-C(1)-C(2)     | 96.83(17)   |
| C(6)-C(1)-C(2)-C(3)     | -0.3(3)     |
| S(1)-C(1)-C(2)-C(3)     | -178.85(16) |
| C(1)-C(2)-C(3)-C(4)     | -0.2(3)     |
| C(2)-C(3)-C(4)-C(5)     | 0.0(3)      |
| C(2)-C(3)-C(4)-C(7)     | 178.6(2)    |
| C(3)-C(4)-C(5)-C(6)     | 0.8(3)      |
| C(7)-C(4)-C(5)-C(6)     | -177.8(2)   |
| C(4)-C(5)-C(6)-C(1)     | -1.2(3)     |
| C(2)-C(1)-C(6)-C(5)     | 1.0(3)      |
| S(1)-C(1)-C(6)-C(5)     | 179.55(16)  |
| O(1)-S(1)-C(8)-C(11)    | -147.76(16) |
| O(2)-S(1)-C(8)-C(11)    | -16.26(19)  |
| C(1)-S(1)-C(8)-C(11)    | 98.23(17)   |
| O(1)-S(1)-C(8)-C(9)     | 38.78(17)   |
| O(2)-S(1)-C(8)-C(9)     | 170.27(15)  |
| C(1)-S(1)-C(8)-C(9)     | -75.23(17)  |
| C(11)-C(8)-C(9)-C(10)   | 86.5(2)     |
| S(1)-C(8)-C(9)-C(10)    | -100.47(19) |
| C(8)-C(9)-C(10)-F(2)    | 65.0(2)     |
| C(8)-C(9)-C(10)-F(3)    | -174.67(18) |
| C(8)-C(9)-C(10)-F(1)    | -55.4(2)    |
| C(12)-N(1)-C(11)-C(8)   | 179.17(19)  |
| C(9)-C(8)-C(11)-N(1)    | -2.4(3)     |
| S(1)-C(8)-C(11)-N(1)    | -175.34(16) |
| C(11)-N(1)-C(12)-C(13)  | 109.0(2)    |
| N(1)-C(12)-C(13)-C(14)  | -25.8(3)    |
| N(1)-C(12)-C(13)-C(18)  | 156.02(18)  |
| C(18)-C(13)-C(14)-C(15) | 0.4(3)      |
| C(12)-C(13)-C(14)-C(15) | -177.8(2)   |
| C(13)-C(14)-C(15)-C(16) | -0.2(3)     |
| C(14)-C(15)-C(16)-C(17) | -0.3(3)     |
| C(15)-C(16)-C(17)-C(18) | 0.8(3)      |
| C(14)-C(13)-C(18)-C(17) | 0.1(3)      |
| C(12)-C(13)-C(18)-C(17) | 178.31(19)  |
| C(16)-C(17)-C(18)-C(13) | -0.6(3)     |

---

Symmetry transformations used to generate equivalent atoms:

**Table S19.** Hydrogen bonds for **5** (CCDC 2281378) [Å and deg.].

---

| D-H...A | d(D-H) | d(H...A) | d(D...A) | <(DHA) |
|---------|--------|----------|----------|--------|
|---------|--------|----------|----------|--------|



16.3 Crystallography data of 8a (CCDC 2310786)

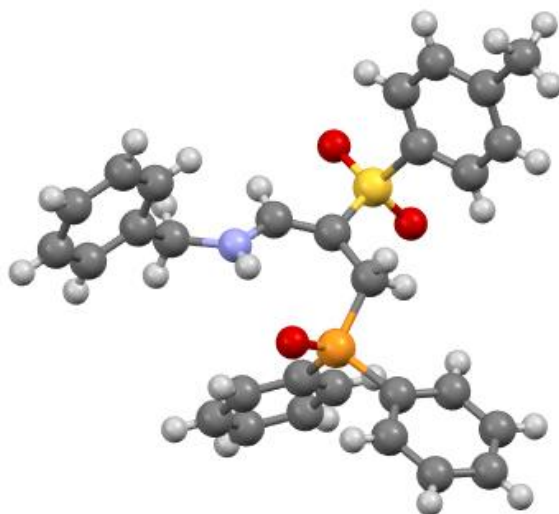

Figure S11. Structure of **8a** (CCDC 2310786): ellipsoid contour probability: 50%.

**Table S20.** Crystal data and structure refinement for **8a** (CCDC 2310786).

|                                   |                                                             |                                                                           |
|-----------------------------------|-------------------------------------------------------------|---------------------------------------------------------------------------|
| Identification code               | <b>8a</b> (CCDC 2310786)                                    |                                                                           |
| Empirical formula                 | C <sub>29</sub> H <sub>28</sub> N O <sub>3</sub> P S        |                                                                           |
| Formula weight                    | 501.55                                                      |                                                                           |
| Temperature                       | 120(2) K                                                    |                                                                           |
| Wavelength                        | 1.54178 Å                                                   |                                                                           |
| Crystal system, space group       | Triclinic, P -1                                             |                                                                           |
| Unit cell dimensions              | a = 11.2161(17) Å<br>b = 11.2502(18) Å<br>c = 11.6904(18) Å | alpha = 89.379(5) deg.<br>beta = 62.804(4) deg.<br>gamma = 74.413(5) deg. |
| Volume                            | 1253.0(3) Å <sup>3</sup>                                    |                                                                           |
| Z, Calculated density             | 2, 1.329 Mg/m <sup>3</sup>                                  |                                                                           |
| Absorption coefficient            | 2.005 mm <sup>-1</sup>                                      |                                                                           |
| F(000)                            | 528                                                         |                                                                           |
| Crystal size                      | 0.200 x 0.180 x 0.150 mm                                    |                                                                           |
| Theta range for data collection   | 4.641 to 66.842 deg.                                        |                                                                           |
| Limiting indices                  | -13 ≤ h ≤ 13, -13 ≤ k ≤ 13, -13 ≤ l ≤ 13                    |                                                                           |
| Reflections collected / unique    | 20327 / 4345 [R(int) = 0.0525]                              |                                                                           |
| Completeness to theta = 66.843    | 97.6 %                                                      |                                                                           |
| Absorption correction             | Semi-empirical from equivalents                             |                                                                           |
| Max. and min. transmission        | 0.7528 and 0.6157                                           |                                                                           |
| Refinement method                 | Full-matrix least-squares on F <sup>2</sup>                 |                                                                           |
| Data / restraints / parameters    | 4345 / 0 / 317                                              |                                                                           |
| Goodness-of-fit on F <sup>2</sup> | 1.021                                                       |                                                                           |
| Final R indices [I > 2σ(I)]       | R1 = 0.0416, wR2 = 0.1345                                   |                                                                           |
| R indices (all data)              | R1 = 0.0423, wR2 = 0.1355                                   |                                                                           |
| Extinction coefficient            | n/a                                                         |                                                                           |
| Largest diff. peak and hole       | 0.404 and -0.511 e.Å <sup>-3</sup>                          |                                                                           |

**Table S21.** Atomic coordinates ( $\times 10^4$ ) and equivalent isotropic displacement parameters ( $\text{\AA}^2 \times 10^3$ ) for **8a** (CCDC 2310786). U(eq) is defined as one third of the trace of the orthogonalized Uij tensor.

|       | x        | y       | z        | U(eq) |
|-------|----------|---------|----------|-------|
| C(1)  | 4849(2)  | 3743(2) | 7387(2)  | 15(1) |
| S(1)  | 3485(1)  | 4741(1) | 8747(1)  | 14(1) |
| O(1)  | 4070(1)  | 5447(1) | 9269(1)  | 19(1) |
| O(2)  | 2382(1)  | 5423(1) | 8456(1)  | 20(1) |
| C(2)  | 2823(2)  | 3729(2) | 9886(2)  | 16(1) |
| C(3)  | 1690(2)  | 3360(2) | 9999(2)  | 20(1) |
| C(4)  | 1266(2)  | 2486(2) | 10815(2) | 22(1) |
| C(5)  | 1971(2)  | 1953(2) | 11501(2) | 21(1) |
| C(6)  | 3100(2)  | 2342(2) | 11376(2) | 20(1) |
| C(7)  | 3522(2)  | 3238(2) | 10590(2) | 18(1) |
| C(8)  | 1527(2)  | 977(2)  | 12358(2) | 29(1) |
| C(9)  | 6065(2)  | 3040(2) | 7604(2)  | 16(1) |
| P(1)  | 7813(1)  | 2587(1) | 6233(1)  | 13(1) |
| O(3)  | 8024(1)  | 1580(1) | 5277(1)  | 18(1) |
| C(10) | 8963(2)  | 2122(2) | 6954(2)  | 15(1) |
| C(11) | 8657(2)  | 2699(2) | 8150(2)  | 19(1) |
| C(12) | 9588(2)  | 2314(2) | 8649(2)  | 24(1) |
| C(13) | 10827(2) | 1361(2) | 7965(2)  | 24(1) |
| C(14) | 11134(2) | 782(2)  | 6779(2)  | 21(1) |
| C(15) | 10209(2) | 1159(2) | 6270(2)  | 17(1) |
| C(16) | 8112(2)  | 3966(2) | 5482(2)  | 15(1) |
| C(17) | 7980(2)  | 5040(2) | 6172(2)  | 19(1) |
| C(18) | 8260(2)  | 6055(2) | 5534(2)  | 21(1) |
| C(19) | 8673(2)  | 6010(2) | 4215(2)  | 21(1) |
| C(20) | 8816(2)  | 4942(2) | 3526(2)  | 21(1) |
| C(21) | 8533(2)  | 3919(2) | 4154(2)  | 18(1) |
| C(22) | 4636(2)  | 3648(2) | 6338(2)  | 16(1) |
| N(1)  | 5484(2)  | 2887(1) | 5217(1)  | 17(1) |
| C(23) | 5327(2)  | 3114(2) | 4047(2)  | 19(1) |
| C(24) | 5452(2)  | 1944(2) | 3323(2)  | 17(1) |
| C(25) | 4667(2)  | 1146(2) | 3952(2)  | 23(1) |
| C(26) | 4761(2)  | 97(2)   | 3267(2)  | 27(1) |
| C(27) | 5649(2)  | -174(2) | 1938(2)  | 27(1) |
| C(28) | 6425(2)  | 618(2)  | 1304(2)  | 26(1) |
| C(29) | 6331(2)  | 1672(2) | 1992(2)  | 22(1) |

**Table S22.** Selected bond lengths [Å] and angles [deg] for **8a** (CCDC 2310786).

---

---

Symmetry transformations used to generate equivalent atoms:

**Table S23.** Bond lengths [Å] and angles [deg] for **8a** (CCDC 2310786).

---

|                 |            |
|-----------------|------------|
| C(1)-C(22)      | 1.363(2)   |
| C(1)-C(9)       | 1.511(2)   |
| C(1)-S(1)       | 1.7381(18) |
| S(1)-O(1)       | 1.4462(13) |
| S(1)-O(2)       | 1.4493(13) |
| S(1)-C(2)       | 1.7721(17) |
| C(2)-C(3)       | 1.390(3)   |
| C(2)-C(7)       | 1.394(3)   |
| C(3)-C(4)       | 1.386(3)   |
| C(3)-H(3)       | 0.9500     |
| C(4)-C(5)       | 1.393(3)   |
| C(4)-H(4)       | 0.9500     |
| C(5)-C(6)       | 1.394(3)   |
| C(5)-C(8)       | 1.507(3)   |
| C(6)-C(7)       | 1.386(3)   |
| C(6)-H(6)       | 0.9500     |
| C(7)-H(7)       | 0.9500     |
| C(8)-H(8A)      | 0.9800     |
| C(8)-H(8B)      | 0.9800     |
| C(8)-H(8C)      | 0.9800     |
| C(9)-P(1)       | 1.8118(18) |
| C(9)-H(9A)      | 0.9900     |
| C(9)-H(9B)      | 0.9900     |
| P(1)-O(3)       | 1.4933(13) |
| P(1)-C(16)      | 1.8077(17) |
| P(1)-C(10)      | 1.8081(18) |
| C(10)-C(15)     | 1.396(3)   |
| C(10)-C(11)     | 1.399(2)   |
| C(11)-C(12)     | 1.388(3)   |
| C(11)-H(11)     | 0.9500     |
| C(12)-C(13)     | 1.386(3)   |
| C(12)-H(12)     | 0.9500     |
| C(13)-C(14)     | 1.389(3)   |
| C(13)-H(13)     | 0.9500     |
| C(14)-C(15)     | 1.390(3)   |
| C(14)-H(14)     | 0.9500     |
| C(15)-H(15)     | 0.9500     |
| C(16)-C(17)     | 1.397(2)   |
| C(16)-C(21)     | 1.398(3)   |
| C(17)-C(18)     | 1.385(3)   |
| C(17)-H(17)     | 0.9500     |
| C(18)-C(19)     | 1.389(3)   |
| C(18)-H(18)     | 0.9500     |
| C(19)-C(20)     | 1.385(3)   |
| C(19)-H(19)     | 0.9500     |
| C(20)-C(21)     | 1.389(3)   |
| C(20)-H(20)     | 0.9500     |
| C(21)-H(21)     | 0.9500     |
| C(22)-N(1)      | 1.343(2)   |
| C(22)-H(22)     | 0.9500     |
| N(1)-C(23)      | 1.467(2)   |
| N(1)-H(1)       | 0.8800     |
| C(23)-C(24)     | 1.512(2)   |
| C(23)-H(23A)    | 0.9900     |
| C(23)-H(23B)    | 0.9900     |
| C(24)-C(29)     | 1.390(3)   |
| C(24)-C(25)     | 1.393(3)   |
| C(25)-C(26)     | 1.386(3)   |
| C(25)-H(25)     | 0.9500     |
| C(26)-C(27)     | 1.390(3)   |
| C(26)-H(26)     | 0.9500     |
| C(27)-C(28)     | 1.384(3)   |
| C(27)-H(27)     | 0.9500     |
| C(28)-C(29)     | 1.393(3)   |
| C(28)-H(28)     | 0.9500     |
| C(29)-H(29)     | 0.9500     |
| <br>            |            |
| C(22)-C(1)-C(9) | 130.00(16) |
| C(22)-C(1)-S(1) | 116.68(13) |
| C(9)-C(1)-S(1)  | 113.16(12) |

|                   |            |
|-------------------|------------|
| O(1)-S(1)-O(2)    | 118.02(8)  |
| O(1)-S(1)-C(1)    | 108.54(8)  |
| O(2)-S(1)-C(1)    | 110.29(8)  |
| O(1)-S(1)-C(2)    | 106.78(8)  |
| O(2)-S(1)-C(2)    | 108.26(8)  |
| C(1)-S(1)-C(2)    | 103.98(8)  |
| C(3)-C(2)-C(7)    | 120.81(16) |
| C(3)-C(2)-S(1)    | 120.11(14) |
| C(7)-C(2)-S(1)    | 118.90(13) |
| C(4)-C(3)-C(2)    | 119.11(17) |
| C(4)-C(3)-H(3)    | 120.4      |
| C(2)-C(3)-H(3)    | 120.4      |
| C(3)-C(4)-C(5)    | 121.29(17) |
| C(3)-C(4)-H(4)    | 119.4      |
| C(5)-C(4)-H(4)    | 119.4      |
| C(4)-C(5)-C(6)    | 118.48(17) |
| C(4)-C(5)-C(8)    | 120.87(17) |
| C(6)-C(5)-C(8)    | 120.65(17) |
| C(7)-C(6)-C(5)    | 121.29(17) |
| C(7)-C(6)-H(6)    | 119.4      |
| C(5)-C(6)-H(6)    | 119.4      |
| C(6)-C(7)-C(2)    | 118.97(16) |
| C(6)-C(7)-H(7)    | 120.5      |
| C(2)-C(7)-H(7)    | 120.5      |
| C(5)-C(8)-H(8A)   | 109.5      |
| C(5)-C(8)-H(8B)   | 109.5      |
| H(8A)-C(8)-H(8B)  | 109.5      |
| C(5)-C(8)-H(8C)   | 109.5      |
| H(8A)-C(8)-H(8C)  | 109.5      |
| H(8B)-C(8)-H(8C)  | 109.5      |
| C(1)-C(9)-P(1)    | 118.51(12) |
| C(1)-C(9)-H(9A)   | 107.7      |
| P(1)-C(9)-H(9A)   | 107.7      |
| C(1)-C(9)-H(9B)   | 107.7      |
| P(1)-C(9)-H(9B)   | 107.7      |
| H(9A)-C(9)-H(9B)  | 107.1      |
| O(3)-P(1)-C(16)   | 111.19(8)  |
| O(3)-P(1)-C(10)   | 112.65(8)  |
| C(16)-P(1)-C(10)  | 107.80(8)  |
| O(3)-P(1)-C(9)    | 112.95(8)  |
| C(16)-P(1)-C(9)   | 107.61(8)  |
| C(10)-P(1)-C(9)   | 104.24(8)  |
| C(15)-C(10)-C(11) | 119.49(16) |
| C(15)-C(10)-P(1)  | 117.99(13) |
| C(11)-C(10)-P(1)  | 122.51(13) |
| C(12)-C(11)-C(10) | 120.03(17) |
| C(12)-C(11)-H(11) | 120.0      |
| C(10)-C(11)-H(11) | 120.0      |
| C(13)-C(12)-C(11) | 120.33(17) |
| C(13)-C(12)-H(12) | 119.8      |
| C(11)-C(12)-H(12) | 119.8      |
| C(12)-C(13)-C(14) | 119.87(17) |
| C(12)-C(13)-H(13) | 120.1      |
| C(14)-C(13)-H(13) | 120.1      |
| C(13)-C(14)-C(15) | 120.32(17) |
| C(13)-C(14)-H(14) | 119.8      |
| C(15)-C(14)-H(14) | 119.8      |
| C(14)-C(15)-C(10) | 119.96(17) |
| C(14)-C(15)-H(15) | 120.0      |
| C(10)-C(15)-H(15) | 120.0      |
| C(17)-C(16)-C(21) | 119.85(16) |
| C(17)-C(16)-P(1)  | 122.30(13) |
| C(21)-C(16)-P(1)  | 117.82(13) |
| C(18)-C(17)-C(16) | 119.56(17) |
| C(18)-C(17)-H(17) | 120.2      |
| C(16)-C(17)-H(17) | 120.2      |
| C(17)-C(18)-C(19) | 120.54(17) |
| C(17)-C(18)-H(18) | 119.7      |
| C(19)-C(18)-H(18) | 119.7      |
| C(20)-C(19)-C(18) | 120.05(17) |
| C(20)-C(19)-H(19) | 120.0      |
| C(18)-C(19)-H(19) | 120.0      |
| C(19)-C(20)-C(21) | 120.04(17) |
| C(19)-C(20)-H(20) | 120.0      |

|                     |            |
|---------------------|------------|
| C(21)-C(20)-H(20)   | 120.0      |
| C(20)-C(21)-C(16)   | 119.95(17) |
| C(20)-C(21)-H(21)   | 120.0      |
| C(16)-C(21)-H(21)   | 120.0      |
| N(1)-C(22)-C(1)     | 127.83(17) |
| N(1)-C(22)-H(22)    | 116.1      |
| C(1)-C(22)-H(22)    | 116.1      |
| C(22)-N(1)-C(23)    | 121.56(15) |
| C(22)-N(1)-H(1)     | 119.2      |
| C(23)-N(1)-H(1)     | 119.2      |
| N(1)-C(23)-C(24)    | 112.99(14) |
| N(1)-C(23)-H(23A)   | 109.0      |
| C(24)-C(23)-H(23A)  | 109.0      |
| N(1)-C(23)-H(23B)   | 109.0      |
| C(24)-C(23)-H(23B)  | 109.0      |
| H(23A)-C(23)-H(23B) | 107.8      |
| C(29)-C(24)-C(25)   | 118.85(17) |
| C(29)-C(24)-C(23)   | 119.71(16) |
| C(25)-C(24)-C(23)   | 121.40(17) |
| C(26)-C(25)-C(24)   | 120.73(18) |
| C(26)-C(25)-H(25)   | 119.6      |
| C(24)-C(25)-H(25)   | 119.6      |
| C(25)-C(26)-C(27)   | 120.17(18) |
| C(25)-C(26)-H(26)   | 119.9      |
| C(27)-C(26)-H(26)   | 119.9      |
| C(28)-C(27)-C(26)   | 119.45(18) |
| C(28)-C(27)-H(27)   | 120.3      |
| C(26)-C(27)-H(27)   | 120.3      |
| C(27)-C(28)-C(29)   | 120.42(19) |
| C(27)-C(28)-H(28)   | 119.8      |
| C(29)-C(28)-H(28)   | 119.8      |
| C(24)-C(29)-C(28)   | 120.38(18) |
| C(24)-C(29)-H(29)   | 119.8      |
| C(28)-C(29)-H(29)   | 119.8      |

---

Symmetry transformations used to generate equivalent atoms:

**Table S24.** Anisotropic displacement parameters ( $\text{\AA}^2 \times 10^3$ ) for **8a** (CCDC 2310786).  
The anisotropic displacement factor exponent takes the form:  
 $-2 \pi^2 [ h^2 a^2 U_{11} + \dots + 2 h k a^* b^* U_{12} ]$

|       | U11   | U22   | U33   | U23   | U13    | U12    |
|-------|-------|-------|-------|-------|--------|--------|
| C(1)  | 14(1) | 17(1) | 14(1) | 2(1)  | -6(1)  | -6(1)  |
| S(1)  | 14(1) | 14(1) | 14(1) | 1(1)  | -7(1)  | -4(1)  |
| O(1)  | 22(1) | 18(1) | 21(1) | 0(1)  | -11(1) | -7(1)  |
| O(2)  | 17(1) | 21(1) | 20(1) | 3(1)  | -10(1) | -2(1)  |
| C(2)  | 15(1) | 17(1) | 13(1) | 0(1)  | -5(1)  | -5(1)  |
| C(3)  | 19(1) | 25(1) | 18(1) | 2(1)  | -10(1) | -7(1)  |
| C(4)  | 20(1) | 27(1) | 20(1) | 1(1)  | -7(1)  | -12(1) |
| C(5)  | 23(1) | 20(1) | 13(1) | 0(1)  | -3(1)  | -6(1)  |
| C(6)  | 19(1) | 22(1) | 15(1) | 1(1)  | -7(1)  | -2(1)  |
| C(7)  | 16(1) | 21(1) | 15(1) | 0(1)  | -7(1)  | -5(1)  |
| C(8)  | 33(1) | 26(1) | 24(1) | 8(1)  | -8(1)  | -11(1) |
| C(9)  | 15(1) | 18(1) | 17(1) | 4(1)  | -8(1)  | -6(1)  |
| P(1)  | 13(1) | 14(1) | 13(1) | 0(1)  | -6(1)  | -4(1)  |
| O(3)  | 19(1) | 17(1) | 19(1) | -2(1) | -10(1) | -4(1)  |
| C(10) | 16(1) | 14(1) | 16(1) | 3(1)  | -7(1)  | -6(1)  |
| C(11) | 16(1) | 21(1) | 16(1) | -2(1) | -7(1)  | -3(1)  |
| C(12) | 23(1) | 31(1) | 18(1) | 0(1)  | -11(1) | -6(1)  |
| C(13) | 22(1) | 26(1) | 27(1) | 6(1)  | -16(1) | -6(1)  |
| C(14) | 17(1) | 17(1) | 28(1) | 2(1)  | -11(1) | -3(1)  |
| C(15) | 18(1) | 15(1) | 17(1) | 1(1)  | -7(1)  | -6(1)  |
| C(16) | 12(1) | 16(1) | 17(1) | 1(1)  | -7(1)  | -4(1)  |
| C(17) | 18(1) | 21(1) | 16(1) | 1(1)  | -8(1)  | -6(1)  |
| C(18) | 21(1) | 17(1) | 25(1) | 0(1)  | -11(1) | -6(1)  |
| C(19) | 17(1) | 21(1) | 28(1) | 8(1)  | -11(1) | -8(1)  |
| C(20) | 18(1) | 28(1) | 17(1) | 5(1)  | -9(1)  | -7(1)  |
| C(21) | 17(1) | 20(1) | 17(1) | 0(1)  | -8(1)  | -5(1)  |
| C(22) | 17(1) | 16(1) | 18(1) | 3(1)  | -8(1)  | -8(1)  |
| N(1)  | 18(1) | 19(1) | 16(1) | 1(1)  | -10(1) | -4(1)  |
| C(23) | 24(1) | 20(1) | 16(1) | 4(1)  | -11(1) | -8(1)  |
| C(24) | 20(1) | 17(1) | 18(1) | 3(1)  | -13(1) | -5(1)  |
| C(25) | 28(1) | 25(1) | 21(1) | 7(1)  | -14(1) | -11(1) |
| C(26) | 36(1) | 20(1) | 33(1) | 8(1)  | -21(1) | -13(1) |
| C(27) | 31(1) | 20(1) | 34(1) | -5(1) | -21(1) | -2(1)  |
| C(28) | 25(1) | 27(1) | 23(1) | -4(1) | -12(1) | -2(1)  |
| C(29) | 22(1) | 22(1) | 22(1) | 3(1)  | -12(1) | -6(1)  |



**Table S25.** Hydrogen coordinates ( $\times 10^4$ ) and isotropic displacement parameters ( $\text{\AA}^2 \times 10^3$ ) for **8a** (CCDC 2310786).

|        | x     | y    | z     | U(eq) |
|--------|-------|------|-------|-------|
| H(3)   | 1213  | 3703 | 9522  | 24    |
| H(4)   | 479   | 2246 | 10909 | 27    |
| H(6)   | 3590  | 1987 | 11838 | 24    |
| H(7)   | 4276  | 3512 | 10531 | 21    |
| H(8A)  | 654   | 1372 | 13151 | 43    |
| H(8B)  | 2263  | 564  | 12585 | 43    |
| H(8C)  | 1373  | 361  | 11895 | 43    |
| H(9A)  | 5868  | 2275 | 7969  | 20    |
| H(9B)  | 6078  | 3558 | 8276  | 20    |
| H(11)  | 7811  | 3355 | 8622  | 22    |
| H(12)  | 9376  | 2706 | 9463  | 29    |
| H(13)  | 11464 | 1104 | 8307  | 28    |
| H(14)  | 11980 | 125  | 6313  | 25    |
| H(15)  | 10424 | 761  | 5457  | 21    |
| H(17)  | 7700  | 5075 | 7074  | 22    |
| H(18)  | 8170  | 6788 | 6001  | 25    |
| H(19)  | 8858  | 6712 | 3787  | 25    |
| H(20)  | 9109  | 4909 | 2622  | 25    |
| H(21)  | 8626  | 3189 | 3682  | 22    |
| H(22)  | 3785  | 4185 | 6409  | 19    |
| H(1)   | 6149  | 2236 | 5182  | 21    |
| H(23A) | 6055  | 3488 | 3462  | 22    |
| H(23B) | 4398  | 3721 | 4297  | 22    |
| H(25)  | 4061  | 1322 | 4861  | 28    |
| H(26)  | 4217  | -438 | 3708  | 32    |
| H(27)  | 5722  | -898 | 1469  | 32    |
| H(28)  | 7026  | 442  | 394   | 31    |
| H(29)  | 6872  | 2209 | 1548  | 26    |

**Table S26.** Selected torsion angles [deg] for **8a** (CCDC 2310786).

---

---

Symmetry transformations used to generate equivalent atoms:

**Table S27.** Torsion angles [deg] for **8a** (CCDC 2310786).

---

|                         |             |
|-------------------------|-------------|
| C(22)-C(1)-S(1)-O(1)    | -137.24(14) |
| C(9)-C(1)-S(1)-O(1)     | 46.89(14)   |
| C(22)-C(1)-S(1)-O(2)    | -6.52(16)   |
| C(9)-C(1)-S(1)-O(2)     | 177.61(11)  |
| C(22)-C(1)-S(1)-C(2)    | 109.35(14)  |
| C(9)-C(1)-S(1)-C(2)     | -66.52(13)  |
| O(1)-S(1)-C(2)-C(3)     | 150.74(15)  |
| O(2)-S(1)-C(2)-C(3)     | 22.70(17)   |
| C(1)-S(1)-C(2)-C(3)     | -94.59(16)  |
| O(1)-S(1)-C(2)-C(7)     | -34.11(16)  |
| O(2)-S(1)-C(2)-C(7)     | -162.16(14) |
| C(1)-S(1)-C(2)-C(7)     | 80.55(15)   |
| C(7)-C(2)-C(3)-C(4)     | -0.5(3)     |
| S(1)-C(2)-C(3)-C(4)     | 174.54(14)  |
| C(2)-C(3)-C(4)-C(5)     | -1.4(3)     |
| C(3)-C(4)-C(5)-C(6)     | 1.6(3)      |
| C(3)-C(4)-C(5)-C(8)     | -178.27(17) |
| C(4)-C(5)-C(6)-C(7)     | 0.0(3)      |
| C(8)-C(5)-C(6)-C(7)     | 179.88(17)  |
| C(5)-C(6)-C(7)-C(2)     | -1.8(3)     |
| C(3)-C(2)-C(7)-C(6)     | 2.1(3)      |
| S(1)-C(2)-C(7)-C(6)     | -173.05(13) |
| C(22)-C(1)-C(9)-P(1)    | 34.4(2)     |
| S(1)-C(1)-C(9)-P(1)     | -150.40(10) |
| C(1)-C(9)-P(1)-O(3)     | -70.41(14)  |
| C(1)-C(9)-P(1)-C(16)    | 52.69(15)   |
| C(1)-C(9)-P(1)-C(10)    | 166.98(13)  |
| O(3)-P(1)-C(10)-C(15)   | 23.55(16)   |
| C(16)-P(1)-C(10)-C(15)  | -99.49(14)  |
| C(9)-P(1)-C(10)-C(15)   | 146.36(14)  |
| O(3)-P(1)-C(10)-C(11)   | -157.30(14) |
| C(16)-P(1)-C(10)-C(11)  | 79.66(16)   |
| C(9)-P(1)-C(10)-C(11)   | -34.50(17)  |
| C(15)-C(10)-C(11)-C(12) | 0.0(3)      |
| P(1)-C(10)-C(11)-C(12)  | -179.09(14) |
| C(10)-C(11)-C(12)-C(13) | 0.2(3)      |
| C(11)-C(12)-C(13)-C(14) | -0.4(3)     |
| C(12)-C(13)-C(14)-C(15) | 0.4(3)      |
| C(13)-C(14)-C(15)-C(10) | -0.1(3)     |
| C(11)-C(10)-C(15)-C(14) | -0.1(3)     |
| P(1)-C(10)-C(15)-C(14)  | 179.10(13)  |
| O(3)-P(1)-C(16)-C(17)   | 179.98(13)  |
| C(10)-P(1)-C(16)-C(17)  | -56.09(16)  |
| C(9)-P(1)-C(16)-C(17)   | 55.81(16)   |
| O(3)-P(1)-C(16)-C(21)   | -2.18(16)   |
| C(10)-P(1)-C(16)-C(21)  | 121.75(14)  |
| C(9)-P(1)-C(16)-C(21)   | -126.35(14) |
| C(21)-C(16)-C(17)-C(18) | 0.4(3)      |
| P(1)-C(16)-C(17)-C(18)  | 178.23(13)  |
| C(16)-C(17)-C(18)-C(19) | -0.1(3)     |
| C(17)-C(18)-C(19)-C(20) | -0.4(3)     |
| C(18)-C(19)-C(20)-C(21) | 0.7(3)      |
| C(19)-C(20)-C(21)-C(16) | -0.4(3)     |
| C(17)-C(16)-C(21)-C(20) | -0.2(3)     |
| P(1)-C(16)-C(21)-C(20)  | -178.06(13) |
| C(9)-C(1)-C(22)-N(1)    | -0.2(3)     |
| S(1)-C(1)-C(22)-N(1)    | -175.24(14) |
| C(1)-C(22)-N(1)-C(23)   | -162.57(17) |
| C(22)-N(1)-C(23)-C(24)  | -136.85(17) |
| N(1)-C(23)-C(24)-C(29)  | -131.05(17) |
| N(1)-C(23)-C(24)-C(25)  | 51.1(2)     |
| C(29)-C(24)-C(25)-C(26) | 0.1(3)      |
| C(23)-C(24)-C(25)-C(26) | 178.00(17)  |
| C(24)-C(25)-C(26)-C(27) | 0.3(3)      |
| C(25)-C(26)-C(27)-C(28) | -0.7(3)     |
| C(26)-C(27)-C(28)-C(29) | 0.7(3)      |
| C(25)-C(24)-C(29)-C(28) | -0.1(3)     |
| C(23)-C(24)-C(29)-C(28) | -178.04(17) |
| C(27)-C(28)-C(29)-C(24) | -0.3(3)     |

---

Symmetry transformations used to generate equivalent atoms:

**Table S28.** Hydrogen bonds for **8a** (CCDC 2310786) [A and deg.].

---

| D-H...A | d(D-H) | d(H...A) | d(D...A) | <(DHA) |
|---------|--------|----------|----------|--------|
|---------|--------|----------|----------|--------|

## 17. Computational details

DFT and time-dependent DFT (TDDFT) calculations have been performed to describe ground and excited states, respectively. All the calculations were carried out using Gaussian16 program suite and the global hybrid functional PBE0<sup>12</sup> in conjunction with the 6-311++G(d,p) basis set<sup>13</sup>. The effect of the solvent (here DMSO) has been modeled by the means of the Polarizable Continuum Model (PCM)<sup>14</sup> using the integral equation formalism variant (IEFPCM)<sup>15</sup>. Only the absorption spectrum of compound **1a** and the corresponding fluorescence from  $^1\text{A}^*$  state have been modeled considering acetonitrile (MeCN) as solvent to enable direct comparison with the experimental data. The computed spectra are reported in **Figure S12**. For the same reason, the phosphorescence of the triplet  $^3\text{A}^*_{s\text{-}trans\text{-}E}$  state has been computed using tetrahydrofuran (THF) as solvent. In the case of open shell diradicals, the Broken Symmetry approach has been applied.

All the calculations were performed using an ultrafine integral grid, and geometry optimizations were performed using tight convergence criteria with no symmetry constrains. After optimization, frequency calculations were performed to ensure the presence of positive eigenvalues of the Hessian matrix in the case of minima, while all transition states were characterized as first order transition states (by the presence of a single imaginary frequency). It should be noted that since the geometry difference between the diradical triplet intermediate  $^3\text{D}^*$  and the corresponding diradical singlet is expected to be small, the energies of the open-shell singlet intermediate  $^1\text{D}^*$  and the transition state **TS IV** are obtained from single point calculations making use of the Broken Symmetry formalism at the corresponding triplet state geometries. This was done because the open-shell singlet intermediate  $^1\text{D}^*$  optimization directly leads to the minimum of the potential energy curve of the corresponding closed-shell  $^1\text{D}^*$  state. We therefore expect the actual minimum of  $^1\text{D}^*$  and **TS IV** to be slightly lower in energy than those reported in **Scheme 3B**.

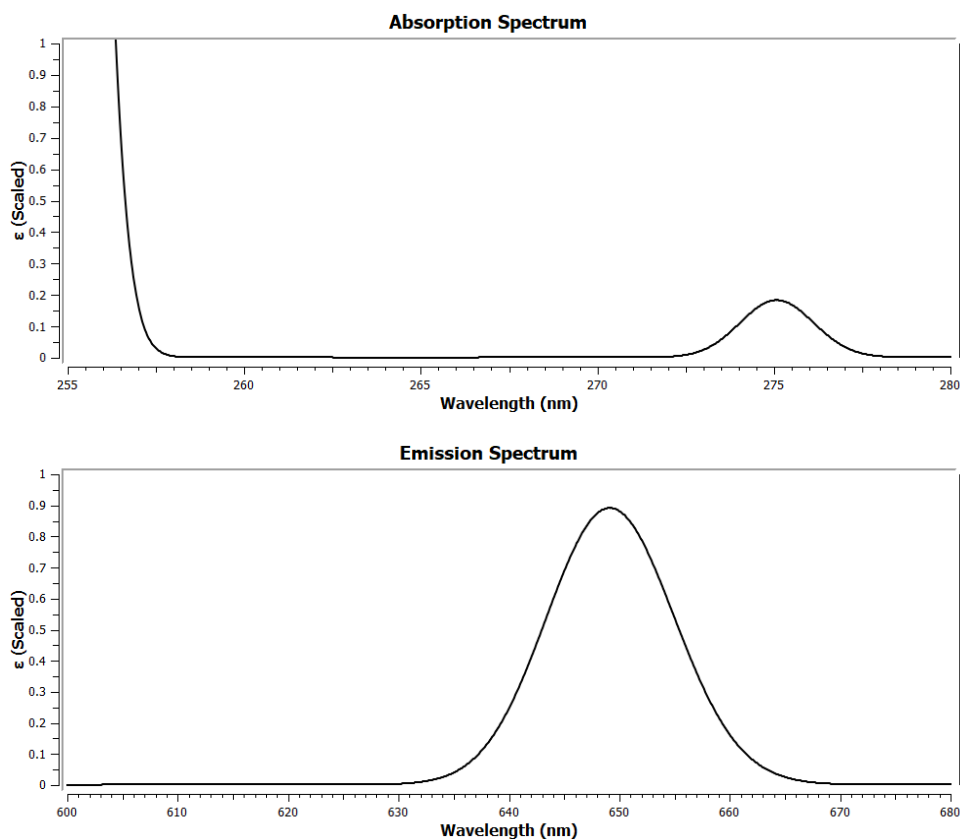

**Figure S12.** Computed absorption and fluorescence spectra in MeCN (spectrum broadening 0.02 eV).

### Diradical Triplet $^3A^*$

In order to evaluate the most plausible geometry of intermediate  $^3A^*$ , four different possible conformations have been considered. These geometries, together with their spin densities and Gibbs free energy difference with respect to the most stable structure ( $^3A^*_{s-trans-E}$  set as zero) are reported in **Scheme S10**. The intermediate  $^3A^*_{s-trans-E}$  is found to be the most energetically stable and is therefore the one considered in the following study of the reaction mechanism. The computed phosphorescence from the  $^3A^*_{s-trans-E}$  in THF ( $\epsilon=7.43$ ) is computed at 2.30 eV, which is in good agreement with the experimental value of 2.51 eV recorded in 2-Methyl-THF ( $\epsilon = 6.97$ ).

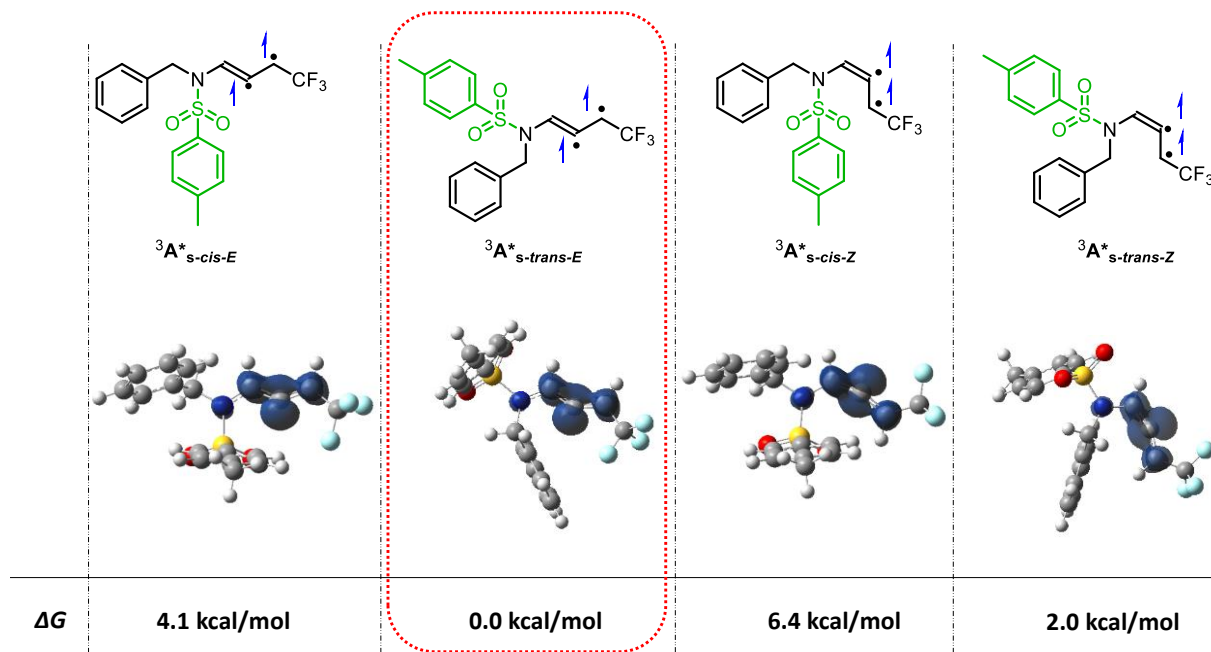

**Scheme S10.** Four proposed geometries of the diradical triplet intermediate  $^3A^*$ . For each, the corresponding spin density (isocontour value 0.01 au) and the  $\Delta G$  with respect to the most stable intermediate  $^3A^*_{s-trans-E}$  are reported.

As discussed in the main text, DFT calculations reported in **Scheme 3** show that route II is more favorable compared to route I. The pathway II involves a first shift of the Ts group from the nitrogen to the  $\beta$ -carbon to the  $\text{CF}_3$ - moiety. This transfer would occur as a frontside or a backside shift to afford the *E* or *Z* isomer intermediate  $^3\text{D}^*$  through a four-membered transition state **TS III** in **Scheme S11A**. The reaction mechanism for both isomers has been thus computed and is reported in **Scheme S11B**. These results show that the *E* isomer of all the intermediates and transition states considered is more stable than the corresponding *Z* isomer.

A. Possible shift directions of Ts group:  $\text{CF}_3$ -substituted *N*-sulfonyl allenamide

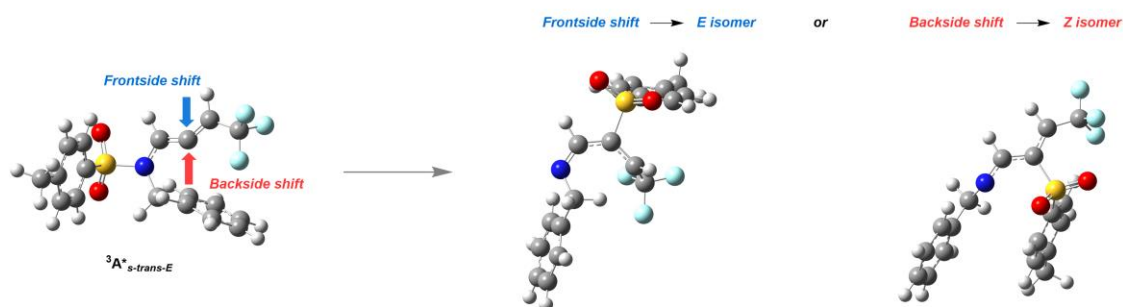

B. Reaction mechanism with frontside (*E* isomer) and backside (*Z* isomer) shift of Ts group:  $\text{CF}_3$ -substituted *N*-sulfonyl allenamide

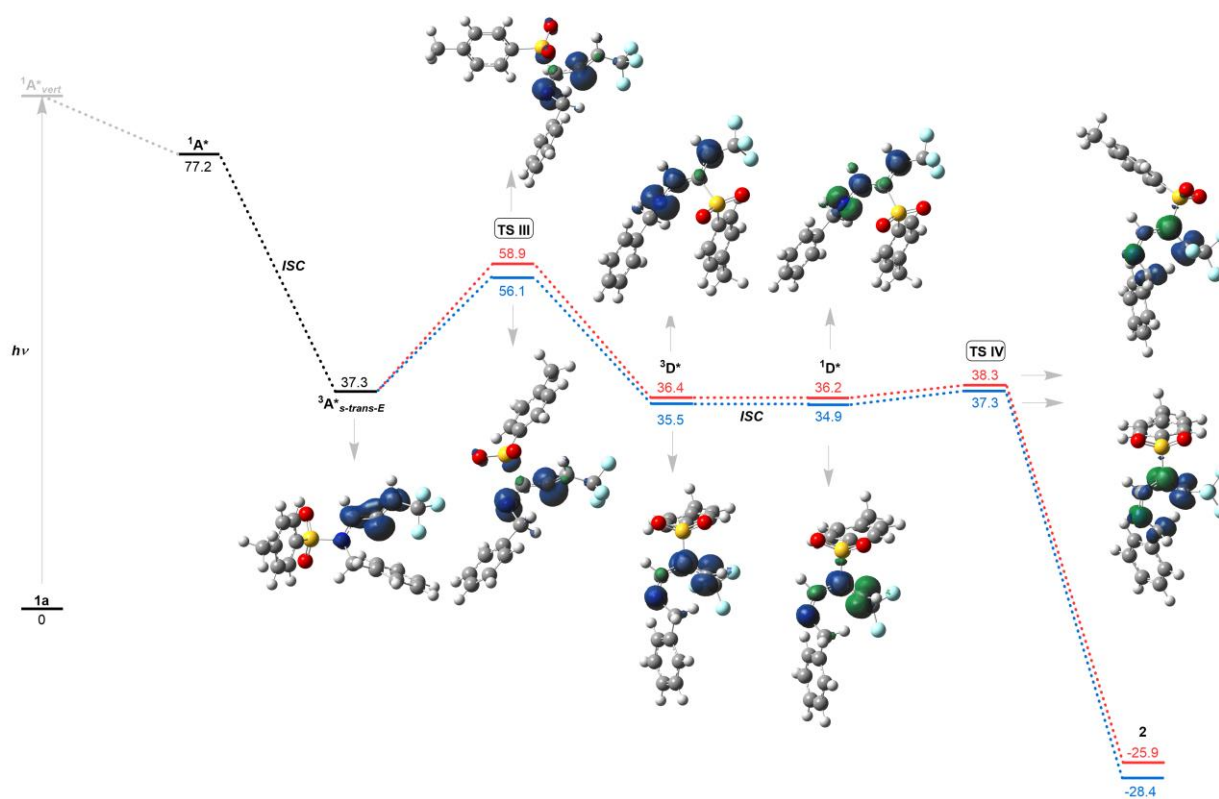

**Scheme S11.** Possible shift directions of the Ts group and reaction mechanism of route II for frontside (*E* isomer) and backside shift (*Z* isomer).



**TableS29. SCF energies (Ha), spin expectation value ( $\langle S^2 \rangle$ ) and optimized geometries in cartesian coordinates (Å) of all intermediate presented in Scheme 3B.**

1a

Energy: -1597.24112952

$\langle S^2 \rangle = 0$

Geometry:

|   |             |             |             |
|---|-------------|-------------|-------------|
| C | 4.41488300  | -0.84788700 | 1.80845800  |
| C | 3.05102200  | -0.59590800 | 1.70191100  |
| C | 2.28770200  | -1.23454800 | 0.72618500  |
| C | 2.90893200  | -2.12345800 | -0.14931200 |
| C | 4.27384500  | -2.37010300 | -0.04898900 |
| C | 5.03064800  | -1.73496900 | 0.93129400  |
| H | 4.99784700  | -0.34355200 | 2.57242500  |
| H | 2.57669000  | 0.10624700  | 2.38196900  |
| H | 2.32115800  | -2.61769300 | -0.91648900 |
| H | 4.74745700  | -3.06149900 | -0.73865500 |
| H | 6.09567100  | -1.92803700 | 1.00882400  |
| C | 0.79659200  | -0.99737300 | 0.67742400  |
| H | 0.28988800  | -1.78846400 | 1.23526700  |
| H | 0.54730800  | -0.04177200 | 1.15414700  |
| N | 0.27459900  | -1.01906500 | -0.68788600 |
| C | 0.51472000  | 0.08938000  | -1.50723700 |
| H | 0.11141700  | 0.01740600  | -2.51296600 |
| C | 1.20708900  | 1.14259200  | -1.15566800 |
| C | 1.95120700  | 2.17559300  | -0.88445600 |
| H | 3.02655800  | 2.18961600  | -1.05133900 |
| C | 1.39619900  | 3.43442800  | -0.30247600 |
| F | 0.07285600  | 3.39564800  | -0.11560300 |
| F | 1.95820000  | 3.70948200  | 0.89209800  |
| F | 1.65570400  | 4.49477600  | -1.09343700 |
| S | -1.13553000 | -1.89743400 | -0.98782400 |
| O | -1.31137600 | -1.86029800 | -2.43092100 |
| O | -0.96417700 | -3.16066400 | -0.29058500 |
| C | -2.46698700 | -1.01569400 | -0.22719000 |
| C | -2.86211400 | -1.35592400 | 1.06317400  |
| C | -3.06735000 | 0.03543900  | -0.91484300 |
| C | -3.87574200 | -0.62646800 | 1.66717200  |
| H | -2.39317800 | -2.18613300 | 1.57870200  |
| C | -4.07794000 | 0.75187500  | -0.29128200 |
| H | -2.76005100 | 0.28055300  | -1.92521800 |
| C | -4.49759400 | 0.43523700  | 1.00415500  |

|   |             |             |             |
|---|-------------|-------------|-------------|
| H | -4.19100700 | -0.88957600 | 2.67203300  |
| H | -4.55242700 | 1.57080900  | -0.82267100 |
| C | -5.61208100 | 1.19655600  | 1.65544200  |
| H | -6.57137800 | 0.70284500  | 1.46493500  |
| H | -5.47977100 | 1.24668700  | 2.73835600  |
| H | -5.68206700 | 2.21305600  | 1.26308100  |

1A\*

Energy: -1597.18506647

<S\*\*2>=0

Geometry:

|   |             |             |             |
|---|-------------|-------------|-------------|
| C | 3.92708900  | -2.49682600 | 1.57454800  |
| C | 2.77086900  | -1.72277700 | 1.58102000  |
| C | 1.72091400  | -2.01658200 | 0.71325200  |
| C | 1.83929100  | -3.09411800 | -0.16453500 |
| C | 2.99938400  | -3.86073200 | -0.17822500 |
| C | 4.04503900  | -3.56490300 | 0.69156700  |
| H | 4.73703900  | -2.26103400 | 2.25715000  |
| H | 2.68454900  | -0.87998800 | 2.25947200  |
| H | 1.02226100  | -3.33241700 | -0.83785600 |
| H | 3.08427800  | -4.69496600 | -0.86710300 |
| H | 4.94830800  | -4.16623900 | 0.68154900  |
| C | 0.45945500  | -1.18821300 | 0.76931200  |
| H | -0.40303500 | -1.81844700 | 0.99456700  |
| H | 0.54296400  | -0.42590100 | 1.54544100  |
| N | 0.17099900  | -0.48731900 | -0.49207400 |
| C | 0.86871100  | 0.59094800  | -0.89721100 |
| H | 0.57685600  | 0.97879200  | -1.87340300 |
| C | 1.85972200  | 1.14654600  | -0.10810800 |
| C | 2.68644700  | 2.22479600  | -0.44377400 |
| H | 3.75147900  | 2.03940500  | -0.57809300 |
| C | 2.37763100  | 3.57224900  | 0.02242500  |
| F | 1.07239600  | 3.90228100  | -0.13407600 |
| F | 2.62579500  | 3.80816200  | 1.35831400  |
| F | 3.10553100  | 4.51141500  | -0.62379300 |
| S | -1.20940500 | -1.01389300 | -1.42836400 |
| O | -1.12239500 | -0.28053700 | -2.67336300 |
| O | -1.16042500 | -2.46079900 | -1.39677400 |
| C | -2.57085300 | -0.44870400 | -0.47258700 |
| C | -3.22362600 | -1.34345100 | 0.37040200  |
| C | -2.96250500 | 0.88541800  | -0.57364000 |
| C | -4.29119700 | -0.88326600 | 1.12630500  |
| H | -2.91096300 | -2.37994300 | 0.42129600  |
| C | -4.02951900 | 1.32029600  | 0.19281800  |
| H | -2.44993200 | 1.56627700  | -1.24384300 |
| C | -4.70899800 | 0.44803600  | 1.05209000  |
| H | -4.80976500 | -1.57287000 | 1.78421800  |

|   |             |            |            |
|---|-------------|------------|------------|
| H | -4.34501400 | 2.35615800 | 0.12229600 |
| C | -5.87948200 | 0.92981100 | 1.85145600 |
| H | -6.78688500 | 0.91268400 | 1.23773600 |
| H | -6.05641000 | 0.29600300 | 2.72215700 |
| H | -5.73340400 | 1.95880000 | 2.18716000 |

<sup>3</sup>A\*<sub>s-trans-E</sub>

Energy: -1597.17679407

<S\*\*2>=2.01

Geometry:

|   |             |             |             |
|---|-------------|-------------|-------------|
| C | 4.34331300  | -0.60768300 | 1.73929000  |
| C | 2.97097400  | -0.38969300 | 1.66840900  |
| C | 2.19111100  | -1.08928800 | 0.74964200  |
| C | 2.80273200  | -2.00689400 | -0.10437700 |
| C | 4.17449400  | -2.21988400 | -0.03925300 |
| C | 4.94869800  | -1.52207800 | 0.88413800  |
| H | 4.94002300  | -0.05548700 | 2.45811500  |
| H | 2.50330800  | 0.33344700  | 2.33025200  |
| H | 2.20248300  | -2.55075300 | -0.82738800 |
| H | 4.64082500  | -2.93357900 | -0.71082900 |
| H | 6.01977500  | -1.68900200 | 0.93386700  |
| C | 0.69523200  | -0.88744100 | 0.73477100  |
| H | 0.21027300  | -1.71425800 | 1.25854500  |
| H | 0.43003600  | 0.04072600  | 1.25159800  |
| N | 0.15525100  | -0.85849200 | -0.62633800 |
| C | 0.43302100  | 0.21191400  | -1.45002600 |
| H | 0.00445100  | 0.15939200  | -2.44886900 |
| C | 1.23598200  | 1.25077500  | -1.07853700 |
| C | 1.75951500  | 2.38998300  | -1.57582700 |
| H | 1.55399600  | 2.71802500  | -2.59473100 |
| C | 2.67367400  | 3.25955000  | -0.80547600 |
| F | 2.71930000  | 2.95922600  | 0.50058400  |
| F | 3.95193100  | 3.19971600  | -1.25785900 |
| F | 2.32275300  | 4.56227100  | -0.90026100 |
| S | -1.19719600 | -1.82246000 | -0.98423100 |
| O | -1.35471700 | -1.73974400 | -2.42619800 |
| O | -0.95243800 | -3.09547800 | -0.33016700 |
| C | -2.57670700 | -1.04264300 | -0.20487700 |
| C | -2.97401700 | -1.46506600 | 1.05932000  |
| C | -3.21621500 | 0.01186500  | -0.85315300 |
| C | -4.03275100 | -0.81535200 | 1.67881600  |
| H | -2.47270000 | -2.29539900 | 1.54311700  |
| C | -4.26964200 | 0.64630700  | -0.21507600 |
| H | -2.90407000 | 0.32113500  | -1.84426100 |
| C | -4.69436400 | 0.24572700  | 1.05675300  |
| H | -4.35115600 | -1.14228100 | 2.66353200  |

|   |             |            |             |
|---|-------------|------------|-------------|
| H | -4.77553200 | 1.46620300 | -0.71526000 |
| C | -5.85283800 | 0.92610100 | 1.72026300  |
| H | -6.79758600 | 0.57143000 | 1.29427100  |
| H | -5.87406300 | 0.72327300 | 2.79245300  |
| H | -5.81537300 | 2.00765500 | 1.56904800  |

**TSI**

Energy: -1597.12121939

&lt;S\*\*2&gt;=2.01

Geometry:

|   |             |             |             |
|---|-------------|-------------|-------------|
| C | -0.38051900 | -1.82590900 | -4.66221900 |
| C | -0.81474000 | -0.77375300 | -3.86753200 |
| C | -0.78101600 | -0.87427400 | -2.47044500 |
| C | -0.28673700 | -2.04772400 | -1.89024100 |
| C | 0.14417800  | -3.09922000 | -2.68873300 |
| C | 0.10066500  | -2.99401100 | -4.07652400 |
| H | -0.42201000 | -1.73562400 | -5.74284700 |
| H | -1.19574600 | 0.13250500  | -4.32957200 |
| H | -0.24846700 | -2.14567700 | -0.80999600 |
| H | 0.51589100  | -4.00683300 | -2.22418900 |
| H | 0.43886400  | -3.81711700 | -4.69714200 |
| C | -1.21207400 | 0.29311200  | -1.67297700 |
| H | -1.96015200 | 0.91548800  | -2.16125700 |
| N | -1.50646500 | 0.10728200  | -0.28621100 |
| C | -0.50777700 | 0.21504800  | 0.66280500  |
| H | -0.82027400 | 0.07456600  | 1.69173500  |
| C | 0.74450500  | 0.54151100  | 0.31640900  |
| C | 2.04148100  | 2.27078500  | -0.94758500 |
| F | 1.44205800  | 3.28627700  | -0.29763400 |
| F | 3.24779700  | 2.10581200  | -0.34771900 |
| F | 2.30148500  | 2.69765400  | -2.19689300 |
| S | -3.14238200 | -0.10060200 | 0.21041800  |
| O | -3.13899300 | 0.07908700  | 1.65167200  |
| O | -3.91861200 | 0.77018600  | -0.65388300 |
| C | -3.52490900 | -1.77703800 | -0.17496500 |
| C | -4.06925500 | -2.08120000 | -1.41825800 |
| C | -3.24345700 | -2.76878700 | 0.76138900  |
| C | -4.33381900 | -3.40883600 | -1.72220400 |
| H | -4.28926100 | -1.29374000 | -2.12962800 |
| C | -3.51557300 | -4.08733700 | 0.43537800  |
| H | -2.82719100 | -2.51045600 | 1.72846000  |
| C | -4.06169800 | -4.42880300 | -0.80701900 |
| H | -4.76048700 | -3.65599200 | -2.68902500 |
| H | -3.30259600 | -4.86736900 | 1.15956700  |
| C | -4.37447800 | -5.85720200 | -1.13311200 |
| H | -5.33559100 | -6.14512500 | -0.69318000 |

|   |             |             |             |
|---|-------------|-------------|-------------|
| H | -4.44300300 | -6.01462300 | -2.21104500 |
| H | -3.61668600 | -6.53116700 | -0.72699600 |
| C | 1.21347100  | 1.03690600  | -0.96111300 |
| H | 1.63118300  | 0.29206200  | -1.64425600 |
| H | -0.07169500 | 1.00838500  | -1.55065900 |



<sup>3</sup>B\*

Energy: -1597.17142494

<S\*\*2>=2.05

Geometry:

|   |             |             |             |
|---|-------------|-------------|-------------|
| C | 3.99611400  | -1.47879100 | 2.33718000  |
| C | 2.64731100  | -1.38373600 | 2.05088000  |
| C | 2.18525800  | -1.39869200 | 0.71130300  |
| C | 3.14565800  | -1.52550100 | -0.32185600 |
| C | 4.49241400  | -1.62383500 | -0.01997600 |
| C | 4.93068400  | -1.59545500 | 1.30541100  |
| H | 4.32800900  | -1.46408500 | 3.37034000  |
| H | 1.92494200  | -1.29454500 | 2.85682100  |
| H | 2.81899500  | -1.56348400 | -1.35459100 |
| H | 5.21347800  | -1.72801000 | -0.82455500 |
| H | 5.98881600  | -1.66954800 | 1.53230400  |
| C | 0.79399300  | -1.31118500 | 0.47609900  |
| H | 0.10024100  | -1.36927500 | 1.30874900  |
| N | 0.24196900  | -1.17760900 | -0.80476600 |
| C | 0.54707200  | -0.07992800 | -1.63748100 |
| H | 0.14702600  | -0.16955400 | -2.64766200 |
| C | 1.28321200  | 0.94993100  | -1.27838300 |
| C | 1.42793800  | 3.42589800  | -1.32230300 |
| F | 1.72732500  | 3.51675300  | -0.01573700 |
| F | 2.01786500  | 4.46718100  | -1.93379200 |
| F | 0.10162800  | 3.60570200  | -1.43266600 |
| S | -1.24766200 | -1.95984900 | -1.07340300 |
| O | -1.49231600 | -1.84811700 | -2.50214300 |
| O | -1.12769300 | -3.25689900 | -0.43245300 |
| C | -2.45768500 | -1.01129600 | -0.20285900 |
| C | -2.86341700 | -1.42039300 | 1.06282800  |
| C | -2.95354600 | 0.15486500  | -0.78280600 |
| C | -3.78320200 | -0.64307100 | 1.75424200  |
| H | -2.47656000 | -2.33763300 | 1.49160800  |
| C | -3.86865900 | 0.91564300  | -0.07376500 |
| H | -2.63888900 | 0.45471300  | -1.77601700 |
| C | -4.29755800 | 0.53155400  | 1.20200400  |
| H | -4.10767100 | -0.95853700 | 2.74074100  |
| H | -4.26153400 | 1.82392700  | -0.51989400 |
| C | -5.30757400 | 1.35382300  | 1.94320900  |
| H | -6.31073100 | 1.18106700  | 1.53884000  |

|   |             |            |             |
|---|-------------|------------|-------------|
| H | -5.32741300 | 1.09976300 | 3.00445100  |
| H | -5.09778900 | 2.42159400 | 1.84283500  |
| C | 1.88351500  | 2.11713000 | -1.92463300 |
| H | 1.62840300  | 2.14433200 | -2.99329300 |
| H | 2.97670700  | 2.09657000 | -1.85181500 |

**TS II**

Energy: -1597.16699801

&lt;S\*\*2&gt;=2.00

Geometry:

|   |             |             |             |
|---|-------------|-------------|-------------|
| C | 0.32921000  | -5.01501800 | 2.57601700  |
| C | -0.00790100 | -3.69258500 | 2.31281200  |
| C | 0.61821300  | -2.99763000 | 1.27448000  |
| C | 1.58896700  | -3.64296900 | 0.49911700  |
| C | 1.92318600  | -4.96127600 | 0.76344700  |
| C | 1.29430300  | -5.64958300 | 1.80177500  |
| H | -0.16056100 | -5.54895800 | 3.38326700  |
| H | -0.76141500 | -3.19231900 | 2.91435100  |
| H | 2.07117800  | -3.09739900 | -0.30464300 |
| H | 2.67581100  | -5.45959900 | 0.16145300  |
| H | 1.55956200  | -6.68200000 | 2.00497200  |
| C | 0.23409300  | -1.60698500 | 1.03042300  |
| H | -0.53189000 | -1.20242800 | 1.70478600  |
| N | 0.75532400  | -0.90390200 | 0.10585800  |
| C | 0.32647400  | 0.46560100  | -0.03939600 |
| H | 0.91622900  | 1.12576800  | 0.61060600  |
| C | -1.09161900 | 0.75200700  | 0.06746900  |
| C | -3.56838600 | 0.41881000  | 0.29250300  |
| F | -3.36101300 | 1.18247800  | 1.37523800  |
| F | -4.48185600 | 1.05542400  | -0.46033700 |
| F | -4.14904100 | -0.71438200 | 0.72461400  |
| S | 0.94362800  | 0.96073500  | -1.75244600 |
| O | 2.39903900  | 0.79615000  | -1.78059300 |
| O | 0.12242900  | 0.25309100  | -2.74119700 |
| C | 0.56555200  | 2.69179700  | -1.84278000 |
| C | -0.59530200 | 3.10523800  | -2.48586600 |
| C | 1.42802200  | 3.60784200  | -1.24629800 |
| C | -0.89276400 | 4.46065300  | -2.52837500 |
| H | -1.24599800 | 2.37799900  | -2.95816400 |
| C | 1.11060300  | 4.95641800  | -1.29539500 |
| H | 2.33804800  | 3.27243300  | -0.76081900 |
| C | -0.05017200 | 5.40386200  | -1.93561900 |
| H | -1.79577600 | 4.79060900  | -3.03226300 |
| H | 1.77817600  | 5.67654200  | -0.83247700 |
| C | -0.36394000 | 6.86768900  | -2.00572500 |
| H | 0.21978300  | 7.34450100  | -2.80062100 |

|   |             |             |             |
|---|-------------|-------------|-------------|
| H | -1.42015100 | 7.03949200  | -2.22102500 |
| H | -0.11053100 | 7.37197700  | -1.07020100 |
| C | -2.29334500 | 0.12917500  | -0.49754100 |
| H | -2.17598100 | -0.96144100 | -0.54502500 |
| H | -2.46446600 | 0.46369200  | -1.52901000 |

<sup>3</sup>C\*

Energy: -1597.21246382

<S\*\*2>=2.04

Geometry:

|   |             |             |             |
|---|-------------|-------------|-------------|
| N | 1.48014600  | -0.21750800 | 0.24605700  |
| C | 2.30413200  | -1.15115900 | 0.83537100  |
| H | 1.94575900  | -1.71176200 | 1.70062600  |
| C | 3.60151000  | -1.38709900 | 0.34574600  |
| C | 4.43164200  | -2.34862200 | 0.98372700  |
| C | 4.12722500  | -0.69082600 | -0.77690700 |
| C | 5.70760900  | -2.59726100 | 0.52197400  |
| H | 4.04623000  | -2.88870400 | 1.84338400  |
| C | 5.40648800  | -0.95129700 | -1.22659000 |
| H | 3.50390700  | 0.04437800  | -1.27229300 |
| C | 6.20755500  | -1.90218300 | -0.58568600 |
| H | 6.32691700  | -3.33576300 | 1.02065200  |
| H | 5.79372300  | -0.41289600 | -2.08579900 |
| H | 7.21143800  | -2.10077100 | -0.94533000 |
| C | 0.37775900  | 0.09040300  | 0.83325000  |
| H | 0.07568900  | -0.35141100 | 1.78821600  |
| C | -0.52329000 | 1.05960300  | 0.22857300  |
| S | -2.19506300 | 1.08202000  | 0.80394400  |
| O | -2.87553200 | 2.18975800  | 0.13521800  |
| O | -2.14303100 | 1.02672200  | 2.26672400  |
| C | -2.89213100 | -0.43829200 | 0.22457700  |
| C | -3.47201200 | -0.48472100 | -1.04213200 |
| C | -2.82278800 | -1.57279500 | 1.03013500  |
| C | -3.98833900 | -1.68681900 | -1.49803800 |
| H | -3.52767600 | 0.40968700  | -1.65234500 |
| C | -3.34470600 | -2.76586700 | 0.55362600  |
| H | -2.38370500 | -1.51570400 | 2.01971800  |
| C | -3.93300800 | -2.84351000 | -0.71229000 |
| H | -4.44546100 | -1.72957300 | -2.48165500 |
| H | -3.29830400 | -3.65272600 | 1.17768200  |
| C | -4.52004600 | -4.12986300 | -1.20645100 |
| H | -5.58669500 | -4.17827200 | -0.96047700 |
| H | -4.43130200 | -4.21639400 | -2.29148100 |
| H | -4.03643000 | -4.99240300 | -0.74377500 |
| C | -0.12531400 | 1.90935400  | -0.92002700 |
| H | -0.99017900 | 2.19968700  | -1.51966700 |

|   |             |            |             |
|---|-------------|------------|-------------|
| H | 0.58566100  | 1.35411200 | -1.54042300 |
| C | 0.56744200  | 3.19415200 | -0.50769400 |
| F | -0.22287800 | 3.98523700 | 0.23410500  |
| F | 1.67995300  | 2.97456800 | 0.20843700  |
| F | 0.92743100  | 3.89994000 | -1.59199500 |

2

Energy: -1597.28827305

<S\*\*2>=0

Geometry:

|   |             |             |             |
|---|-------------|-------------|-------------|
| N | 1.84718600  | -0.19671100 | 0.27617400  |
| C | 2.81503200  | -0.79665700 | 0.87459100  |
| H | 2.69879500  | -1.17486700 | 1.89903400  |
| C | 4.11258000  | -1.01227500 | 0.25869600  |
| C | 5.10303600  | -1.67831500 | 0.99068900  |
| C | 4.39399300  | -0.57232800 | -1.04282700 |
| C | 6.35448000  | -1.90357000 | 0.43311400  |
| H | 4.88575500  | -2.01794400 | 1.99908700  |
| C | 5.64299500  | -0.79912900 | -1.59531800 |
| H | 3.62249700  | -0.05589900 | -1.60293300 |
| C | 6.62459200  | -1.46462600 | -0.85919200 |
| H | 7.11821400  | -2.42000900 | 1.00433400  |
| H | 5.85973500  | -0.45861100 | -2.60225500 |
| H | 7.60209000  | -1.63929700 | -1.29673700 |
| C | 0.66573000  | -0.09289800 | 0.97325000  |
| H | 0.55971400  | -0.60385200 | 1.93257500  |
| C | -0.37656000 | 0.61062700  | 0.49130000  |
| S | -1.88273400 | 0.55923500  | 1.43115600  |
| O | -2.48108200 | 1.89492400  | 1.44607000  |
| O | -1.59861200 | -0.10773400 | 2.70440400  |
| C | -2.94944900 | -0.49037900 | 0.47095800  |
| C | -3.94663100 | 0.08058400  | -0.30892800 |
| C | -2.76167100 | -1.87079200 | 0.50733600  |
| C | -4.77117300 | -0.74940200 | -1.06024100 |
| H | -4.08351200 | 1.15608200  | -0.31447000 |
| C | -3.59238400 | -2.68041300 | -0.24837100 |
| H | -1.98211200 | -2.30388700 | 1.12491600  |
| C | -4.60823200 | -2.13480900 | -1.04390500 |
| H | -5.55545000 | -0.30897100 | -1.66779300 |
| H | -3.45458500 | -3.75701100 | -0.22074500 |
| C | -5.50190600 | -3.02983200 | -1.84814200 |
| H | -6.10185300 | -3.66761000 | -1.19125900 |
| H | -6.18296800 | -2.45379000 | -2.47669100 |
| H | -4.91517000 | -3.69221700 | -2.49108900 |
| C | -0.38602600 | 1.32226800  | -0.82541000 |
| H | -1.39098100 | 1.37609100  | -1.25177100 |

|   |             |            |             |
|---|-------------|------------|-------------|
| H | 0.24731400  | 0.77165900 | -1.52529000 |
| C | 0.15415000  | 2.73531100 | -0.79128800 |
| F | -0.59000900 | 3.57406600 | -0.05765100 |
| F | 1.40285900  | 2.79993800 | -0.30398800 |
| F | 0.19472500  | 3.24173500 | -2.03972600 |



**TS III**

Energy: -1597.14490149

&lt;S\*\*2&gt;=2.00

Geometry:

|   |             |             |             |
|---|-------------|-------------|-------------|
| C | 0.44965400  | -5.57886700 | 1.21045800  |
| C | -0.14229000 | -4.33859300 | 0.98870200  |
| C | 0.56221400  | -3.16219900 | 1.23748400  |
| C | 1.87237100  | -3.24438600 | 1.71081900  |
| C | 2.46687700  | -4.48157200 | 1.92920100  |
| C | 1.75626700  | -5.65316000 | 1.68035100  |
| H | -0.10990600 | -6.48681100 | 1.00957600  |
| H | -1.16129600 | -4.28633500 | 0.61539200  |
| H | 2.42936900  | -2.33252600 | 1.90368500  |
| H | 3.48721600  | -4.53226300 | 2.29579000  |
| H | 2.22052600  | -6.61903800 | 1.85122100  |
| C | -0.09570700 | -1.82488400 | 1.03232400  |
| H | -1.04062600 | -1.94392800 | 0.47849400  |
| H | -0.39423000 | -1.39958900 | 2.00627700  |
| N | 0.75715400  | -0.89849600 | 0.34549800  |
| C | 0.22870800  | 0.39447700  | 0.11524900  |
| H | 0.91807500  | 1.14849900  | 0.52368400  |
| C | -1.14083200 | 0.67392600  | 0.48502600  |
| C | -2.37490400 | 0.79883100  | 0.07921700  |
| H | -2.66197100 | 0.70439200  | -0.96998200 |
| C | -3.50507800 | 1.07452400  | 1.01862700  |
| F | -3.11857700 | 1.16546000  | 2.29499300  |
| F | -4.12576700 | 2.22667600  | 0.70492500  |
| F | -4.43744600 | 0.10655800  | 0.94991100  |
| S | 0.51099400  | 0.72579000  | -1.78454100 |
| O | 1.90257200  | 0.38408200  | -2.07159800 |
| O | -0.57132200 | 0.05150900  | -2.50527300 |
| C | 0.30878300  | 2.47836400  | -1.94994900 |
| C | -0.88674200 | 2.98607400  | -2.44519500 |
| C | 1.35202900  | 3.31715700  | -1.56573000 |
| C | -1.03293400 | 4.36132900  | -2.55791800 |
| H | -1.68078000 | 2.31513600  | -2.75166800 |
| C | 1.18160700  | 4.68794900  | -1.67892700 |
| H | 2.28590500  | 2.90671000  | -1.19682800 |
| C | -0.00808800 | 5.23084500  | -2.17629000 |
| H | -1.96096700 | 4.76584500  | -2.94927000 |

|   |             |            |             |
|---|-------------|------------|-------------|
| H | 1.98903700  | 5.34947700 | -1.38139300 |
| C | -0.16561300 | 6.71344900 | -2.32411900 |
| H | 0.25999300  | 7.04635100 | -3.27716000 |
| H | -1.21741900 | 7.00553600 | -2.31266000 |
| H | 0.35702500  | 7.24957600 | -1.52893200 |

<sup>3</sup>D\*

Energy: -1597.18062726

<S\*\*2>=2.04

Geometry:

|   |            |             |             |
|---|------------|-------------|-------------|
| C | 3.31663400 | -4.75142200 | 1.25296200  |
| C | 2.88072600 | -3.61634200 | 0.57724400  |
| C | 1.86519000 | -2.82285900 | 1.11073800  |
| C | 1.29340400 | -3.18419100 | 2.33163500  |
| C | 1.73272800 | -4.31467900 | 3.01069700  |
| C | 2.74600200 | -5.10275200 | 2.47223500  |
| H | 4.10544600 | -5.36231000 | 0.82566300  |
| H | 3.32812000 | -3.34776200 | -0.37460600 |
| H | 0.49710100 | -2.57680200 | 2.75290300  |
| H | 1.27826100 | -4.58449600 | 3.95857000  |
| H | 3.08708000 | -5.98775400 | 2.99944700  |
| C | 1.41040800 | -1.56723000 | 0.41494900  |
| H | 0.35031200 | -1.39404000 | 0.64878300  |
| H | 1.94542300 | -0.69182300 | 0.82962100  |
| N | 1.50337700 | -1.65137800 | -1.01134600 |
| C | 1.98251600 | -0.66953600 | -1.72710200 |
| H | 1.86242300 | -0.76948900 | -2.80546000 |
| C | 3.10864300 | 0.89185000  | -0.00279100 |
| H | 2.59916900 | 1.68131900  | 0.54142200  |
| C | 4.39412800 | 0.42898800  | 0.58869700  |
| F | 4.99804900 | -0.50198100 | -0.15975800 |
| F | 5.26729400 | 1.44348100  | 0.74882000  |
| F | 4.21118400 | -0.09825300 | 1.81620800  |
| C | 2.66008900 | 0.49790600  | -1.31848000 |
| S | 3.00840400 | 1.68593700  | -2.64170700 |
| O | 2.35163400 | 1.20407300  | -3.85615600 |
| O | 2.65790600 | 2.99936700  | -2.10172100 |
| C | 4.75954800 | 1.62610200  | -2.88075500 |
| C | 5.56406200 | 2.57480300  | -2.25939700 |
| C | 5.30273300 | 0.62045700  | -3.67862500 |
| C | 6.93772800 | 2.51182000  | -2.44708800 |
| H | 5.11918200 | 3.35336200  | -1.65076000 |
| C | 6.67609400 | 0.57396300  | -3.84868900 |
| H | 4.66022800 | -0.10605700 | -4.16354500 |
| C | 7.51381500 | 1.51520600  | -3.23825000 |
| H | 7.57297100 | 3.25082500  | -1.96930400 |

|   |            |             |             |
|---|------------|-------------|-------------|
| H | 7.10864700 | -0.20491700 | -4.46874100 |
| C | 8.99527800 | 1.46689100  | -3.45514600 |
| H | 9.25392500 | 1.93562900  | -4.41097100 |
| H | 9.53143700 | 2.00056400  | -2.66829600 |
| H | 9.35699300 | 0.43667900  | -3.49057700 |

**1D\***

Energy: -1597.18232705

$\langle S^2 \rangle = 1.02$

Geometry:

|   |            |             |             |
|---|------------|-------------|-------------|
| C | 3.31663400 | -4.75142200 | 1.25296200  |
| C | 2.88072600 | -3.61634200 | 0.57724400  |
| C | 1.86519000 | -2.82285900 | 1.11073800  |
| C | 1.29340400 | -3.18419100 | 2.33163500  |
| C | 1.73272800 | -4.31467900 | 3.01069700  |
| C | 2.74600200 | -5.10275200 | 2.47223500  |
| H | 4.10544600 | -5.36231000 | 0.82566300  |
| H | 3.32812000 | -3.34776200 | -0.37460600 |
| H | 0.49710100 | -2.57680200 | 2.75290300  |
| H | 1.27826100 | -4.58449600 | 3.95857000  |
| H | 3.08708000 | -5.98775400 | 2.99944700  |
| C | 1.41040800 | -1.56723000 | 0.41494900  |
| H | 0.35031200 | -1.39404000 | 0.64878300  |
| H | 1.94542300 | -0.69182300 | 0.82962100  |
| N | 1.50337700 | -1.65137800 | -1.01134600 |
| C | 1.98251600 | -0.66953600 | -1.72710200 |
| H | 1.86242300 | -0.76948900 | -2.80546000 |
| C | 3.10864300 | 0.89185000  | -0.00279100 |
| H | 2.59916900 | 1.68131900  | 0.54142200  |
| C | 4.39412800 | 0.42898800  | 0.58869700  |
| F | 4.99804900 | -0.50198100 | -0.15975800 |
| F | 5.26729400 | 1.44348100  | 0.74882000  |
| F | 4.21118400 | -0.09825300 | 1.81620800  |
| C | 2.66008900 | 0.49790600  | -1.31848000 |
| S | 3.00840400 | 1.68593700  | -2.64170700 |
| O | 2.35163400 | 1.20407300  | -3.85615600 |
| O | 2.65790600 | 2.99936700  | -2.10172100 |
| C | 4.75954800 | 1.62610200  | -2.88075500 |
| C | 5.56406200 | 2.57480300  | -2.25939700 |
| C | 5.30273300 | 0.62045700  | -3.67862500 |
| C | 6.93772800 | 2.51182000  | -2.44708800 |
| H | 5.11918200 | 3.35336200  | -1.65076000 |
| C | 6.67609400 | 0.57396300  | -3.84868900 |
| H | 4.66022800 | -0.10605700 | -4.16354500 |
| C | 7.51381500 | 1.51520600  | -3.23825000 |
| H | 7.57297100 | 3.25082500  | -1.96930400 |

|   |            |             |             |
|---|------------|-------------|-------------|
| H | 7.10864700 | -0.20491700 | -4.46874100 |
| C | 8.99527800 | 1.46689100  | -3.45514600 |
| H | 9.25392500 | 1.93562900  | -4.41097100 |
| H | 9.53143700 | 2.00056400  | -2.66829600 |
| H | 9.35699300 | 0.43667900  | -3.49057700 |

**TS IV**

Energy: -1597.17623658

&lt;S\*\*2&gt;=0.96

Geometry:

|   |             |             |             |
|---|-------------|-------------|-------------|
| N | 1.63585400  | -0.02572900 | 0.04354300  |
| C | 1.44542500  | -1.09661500 | -0.86298200 |
| H | 1.93677700  | -0.87658000 | -1.81769900 |
| C | 1.77753100  | -2.44947800 | -0.35660400 |
| C | 2.17726300  | -3.44345300 | -1.25690800 |
| C | 1.64717900  | -2.77220200 | 0.99829000  |
| C | 2.44120100  | -4.73172900 | -0.81169500 |
| H | 2.28358200  | -3.20108600 | -2.31029100 |
| C | 1.91733400  | -4.06079000 | 1.44153200  |
| H | 1.34258600  | -2.00856900 | 1.70689500  |
| C | 2.31233500  | -5.04490700 | 0.53929100  |
| H | 2.75340000  | -5.49267500 | -1.51949700 |
| H | 1.81928100  | -4.29830100 | 2.49587900  |
| H | 2.52209900  | -6.05083200 | 0.88767100  |
| C | 0.64327600  | 0.75826200  | 0.35739900  |
| H | 0.85211800  | 1.57994300  | 1.03870100  |
| C | -0.68423300 | 0.63248100  | -0.11515600 |
| S | -1.85811500 | 1.85436900  | 0.49662400  |
| O | -2.56962300 | 2.39539700  | -0.65978100 |
| O | -1.13092000 | 2.76191400  | 1.38420500  |
| C | -2.98789700 | 0.89296800  | 1.45998200  |
| C | -4.12682900 | 0.37221900  | 0.85418000  |
| C | -2.69929800 | 0.64778600  | 2.80073900  |
| C | -4.99286900 | -0.40066200 | 1.61465600  |
| H | -4.33398900 | 0.57922500  | -0.18954100 |
| C | -3.57764500 | -0.12672400 | 3.54108900  |
| H | -1.80718600 | 1.06487000  | 3.25448400  |
| C | -4.73484200 | -0.66120600 | 2.96324100  |
| H | -5.88642300 | -0.80775600 | 1.15221800  |
| H | -3.36363900 | -0.31918300 | 4.58774500  |
| C | -5.68891800 | -1.47396500 | 3.78395700  |
| H | -6.32619900 | -2.09737400 | 3.15417800  |
| H | -5.15710200 | -2.11574500 | 4.49018000  |
| H | -6.34082200 | -0.81635500 | 4.36939500  |
| C | -1.12576600 | -0.45777300 | -0.97469400 |
| H | -1.65122800 | -1.28522200 | -0.49698400 |

|   |             |             |             |
|---|-------------|-------------|-------------|
| H | 0.23889500  | -1.06917100 | -1.13462700 |
| C | -1.58701600 | -0.21372300 | -2.36991100 |
| F | -2.90593700 | 0.05865000  | -2.47293900 |
| F | -0.93139100 | 0.79865600  | -2.95718500 |
| F | -1.38516400 | -1.31262000 | -3.12801300 |



**Table S30.** SCF energies (Ha), spin expectations ( $\langle S^2 \rangle$ ) and optimized geometries in cartesian coordinates (Å) of the two proposed mechanisms in Scheme 4C.

7a

Energy: -1260.40583997

$\langle S^2 \rangle = 0$

Geometry:

|   |           |           |           |
|---|-----------|-----------|-----------|
| C | 4.434189  | -0.873442 | 1.793774  |
| C | 3.065891  | -0.643166 | 1.694159  |
| C | 2.311460  | -1.272440 | 0.705305  |
| C | 2.947729  | -2.130333 | -0.190150 |
| C | 4.316884  | -2.356102 | -0.096489 |
| C | 5.064371  | -1.730196 | 0.896798  |
| H | 5.009356  | -0.375785 | 2.568053  |
| H | 2.580622  | 0.035747  | 2.389976  |
| H | 2.366528  | -2.616044 | -0.967615 |
| H | 4.801349  | -3.023718 | -0.801993 |
| H | 6.132689  | -1.906573 | 0.969069  |
| C | 0.816310  | -1.061070 | 0.663450  |
| H | 0.328606  | -1.866747 | 1.217472  |
| H | 0.554542  | -0.114203 | 1.150784  |
| N | 0.292231  | -1.084021 | -0.700338 |
| C | 0.492979  | 0.063921  | -1.501846 |
| H | 0.151669  | -0.036071 | -2.526952 |
| C | 1.088097  | 1.157568  | -1.096002 |
| S | -1.130721 | -1.937900 | -0.971859 |
| O | -1.321631 | -1.928571 | -2.414753 |
| O | -0.984488 | -3.196399 | -0.256540 |
| C | -2.450685 | -1.024883 | -0.223819 |
| C | -2.842571 | -1.330519 | 1.076380  |
| C | -3.041801 | 0.019773  | -0.928905 |
| C | -3.843457 | -0.575814 | 1.670583  |
| H | -2.380813 | -2.155148 | 1.607209  |
| C | -4.040057 | 0.762579  | -0.315240 |
| H | -2.736566 | 0.238865  | -1.945770 |
| C | -4.456639 | 0.478968  | 0.988443  |
| H | -4.156139 | -0.813315 | 2.682692  |
| H | -4.507000 | 1.576278  | -0.861312 |
| C | -5.558579 | 1.266889  | 1.629946  |
| H | -6.522620 | 0.770891  | 1.472165  |
| H | -5.409220 | 1.353969  | 2.708409  |

|   |           |          |           |
|---|-----------|----------|-----------|
| H | -5.631118 | 2.269656 | 1.204136  |
| C | 1.733907  | 2.238024 | -0.762344 |
| H | 1.217257  | 3.105396 | -0.357845 |
| H | 2.814155  | 2.310203 | -0.870872 |

1E\*

Energy: -1260.29503269

<S\*\*2>=0

Geometry:

|   |           |           |           |
|---|-----------|-----------|-----------|
| C | 4.314506  | -0.455764 | 1.619919  |
| C | 2.929637  | -0.332169 | 1.552302  |
| C | 2.186186  | -1.161601 | 0.715518  |
| C | 2.847024  | -2.111400 | -0.063406 |
| C | 4.229667  | -2.232132 | -0.001634 |
| C | 4.967442  | -1.405573 | 0.842930  |
| H | 4.882686  | 0.196988  | 2.274805  |
| H | 2.423358  | 0.419512  | 2.151327  |
| H | 2.273548  | -2.753718 | -0.725119 |
| H | 4.733930  | -2.973783 | -0.612831 |
| H | 6.047369  | -1.500728 | 0.890994  |
| C | 0.681673  | -1.053069 | 0.688898  |
| H | 0.244536  | -1.928300 | 1.173601  |
| H | 0.357484  | -0.160435 | 1.235167  |
| N | 0.165276  | -1.008929 | -0.682824 |
| C | 0.386155  | 0.139735  | -1.434123 |
| H | -0.016092 | 0.118572  | -2.444476 |
| C | 1.127761  | 1.187809  | -0.965550 |
| C | 1.613145  | 2.384616  | -1.317286 |
| H | 1.409786  | 2.820901  | -2.298768 |
| S | -1.229194 | -1.903057 | -1.024742 |
| O | -1.398051 | -1.817965 | -2.466602 |
| O | -1.039979 | -3.190358 | -0.376579 |
| C | -2.577004 | -1.070193 | -0.241224 |
| C | -2.988505 | -1.476428 | 1.024629  |
| C | -3.167940 | 0.017051  | -0.880322 |
| C | -4.012444 | -0.780674 | 1.651173  |
| H | -2.523551 | -2.330541 | 1.503427  |
| C | -4.187158 | 0.699978  | -0.233872 |
| H | -2.846229 | 0.314711  | -1.871814 |
| C | -4.626038 | 0.314111  | 1.036415  |
| H | -4.341963 | -1.096170 | 2.636138  |
| H | -4.654018 | 1.546640  | -0.727395 |
| C | -5.751473 | 1.039659  | 1.709496  |
| H | -6.713255 | 0.603865  | 1.417266  |
| H | -5.676452 | 0.970105  | 2.796606  |

|   |           |          |           |
|---|-----------|----------|-----------|
| H | -5.770805 | 2.094083 | 1.425784  |
| H | 2.224311  | 2.975051 | -0.639250 |

<sup>3</sup>E\*<sub>s-trans-E</sub>

Energy: -1260.33880326

<S\*\*2>=2.01

Geometry:

|   |           |           |           |
|---|-----------|-----------|-----------|
| C | 4.325328  | -0.567309 | 1.722810  |
| C | 2.945498  | -0.404802 | 1.644793  |
| C | 2.197317  | -1.139277 | 0.726759  |
| C | 2.849390  | -2.035567 | -0.119755 |
| C | 4.228435  | -2.193584 | -0.047972 |
| C | 4.970633  | -1.461042 | 0.874880  |
| H | 4.896442  | 0.011957  | 2.441221  |
| H | 2.446092  | 0.302244  | 2.301234  |
| H | 2.273039  | -2.604493 | -0.842948 |
| H | 4.725758  | -2.891540 | -0.713947 |
| H | 6.047292  | -1.584997 | 0.929959  |
| C | 0.694966  | -0.998040 | 0.701980  |
| H | 0.243122  | -1.854387 | 1.207677  |
| H | 0.391818  | -0.089863 | 1.234573  |
| N | 0.167921  | -0.970666 | -0.664064 |
| C | 0.396006  | 0.158275  | -1.446350 |
| H | -0.005091 | 0.109723  | -2.456657 |
| C | 1.127268  | 1.228303  | -1.015921 |
| C | 1.614778  | 2.411445  | -1.438829 |
| H | 1.403674  | 2.780234  | -2.444534 |
| S | -1.213373 | -1.888593 | -0.996104 |
| O | -1.383909 | -1.822459 | -2.438957 |
| O | -1.010379 | -3.166141 | -0.332458 |
| C | -2.573479 | -1.065047 | -0.222474 |
| C | -2.976385 | -1.458931 | 1.050054  |
| C | -3.184530 | 0.001214  | -0.877435 |
| C | -4.010810 | -0.771127 | 1.667973  |
| H | -2.496603 | -2.297861 | 1.540913  |
| C | -4.214560 | 0.676193  | -0.239842 |
| H | -2.869212 | 0.289375  | -1.873860 |
| C | -4.644102 | 0.303392  | 1.037507  |
| H | -4.332860 | -1.077102 | 2.658442  |
| H | -4.697025 | 1.506599  | -0.745767 |
| C | -5.779834 | 1.020715  | 1.702090  |
| H | -6.733378 | 0.550685  | 1.437153  |
| H | -5.689344 | 0.987902  | 2.789825  |

|   |           |          |           |
|---|-----------|----------|-----------|
| H | -5.830438 | 2.064651 | 1.385570  |
| H | 2.225865  | 3.040320 | -0.798963 |

**TS V**

Energy: -1260.31171794

&lt;S\*\*2&gt;=2.02

Geometry:

|   |           |           |           |
|---|-----------|-----------|-----------|
| C | 0.328555  | -5.578453 | 1.345629  |
| C | -0.227567 | -4.318468 | 1.146077  |
| C | 0.560434  | -3.171669 | 1.236030  |
| C | 1.918212  | -3.306033 | 1.526348  |
| C | 2.476866  | -4.564206 | 1.722529  |
| C | 1.683460  | -5.704752 | 1.633758  |
| H | -0.297070 | -6.462008 | 1.268967  |
| H | -1.285274 | -4.227096 | 0.914474  |
| H | 2.539192  | -2.418310 | 1.592131  |
| H | 3.535254  | -4.654620 | 1.945834  |
| H | 2.119900  | -6.686533 | 1.786438  |
| C | -0.066430 | -1.813627 | 1.064722  |
| H | -1.025775 | -1.897294 | 0.529685  |
| H | -0.340426 | -1.402508 | 2.052607  |
| N | 0.791132  | -0.888274 | 0.388720  |
| C | 0.261144  | 0.405450  | 0.162792  |
| H | 0.938792  | 1.152750  | 0.603847  |
| C | -1.122239 | 0.679773  | 0.479622  |
| C | -2.339938 | 0.839109  | 0.040589  |
| H | -2.576097 | 0.799038  | -1.025722 |
| S | 0.648064  | 0.753003  | -1.718189 |
| O | 2.073869  | 0.488666  | -1.922443 |
| O | -0.343464 | 0.026328  | -2.517084 |
| C | 0.371565  | 2.495523  | -1.911487 |
| C | -0.803925 | 2.942638  | -2.502420 |
| C | 1.339587  | 3.386968  | -1.456460 |
| C | -1.006113 | 4.308625  | -2.641669 |
| H | -1.539767 | 2.231127  | -2.858805 |
| C | 1.113970  | 4.747621  | -1.596198 |
| H | 2.260365  | 3.024509  | -1.012331 |
| C | -0.056773 | 5.229377  | -2.191360 |
| H | -1.919075 | 4.665390  | -3.108020 |
| H | 1.863266  | 5.449201  | -1.243125 |
| C | -0.271950 | 6.701955  | -2.366848 |
| H | 0.226704  | 7.052692  | -3.277094 |
| H | -1.333045 | 6.941473  | -2.458552 |

|   |           |          |           |
|---|-----------|----------|-----------|
| H | 0.144463  | 7.266441 | -1.529555 |
| H | -3.172768 | 1.014967 | 0.719033  |



3F\*

Energy: -1260.34886265

<S\*\*2>=2.04

Geometry:

|   |          |           |           |
|---|----------|-----------|-----------|
| C | 3.332359 | -4.760206 | 1.145376  |
| C | 2.910669 | -3.588124 | 0.526344  |
| C | 1.958016 | -2.768727 | 1.133099  |
| C | 1.435834 | -3.144581 | 2.371373  |
| C | 1.859976 | -4.313480 | 2.994315  |
| C | 2.809951 | -5.125807 | 2.382353  |
| H | 4.071916 | -5.389409 | 0.660184  |
| H | 3.319591 | -3.308866 | -0.439845 |
| H | 0.688463 | -2.518544 | 2.851142  |
| H | 1.442607 | -4.593423 | 3.956335  |
| H | 3.138922 | -6.040204 | 2.865340  |
| C | 1.530543 | -1.473876 | 0.492637  |
| H | 0.527909 | -1.210324 | 0.856943  |
| H | 2.196668 | -0.657095 | 0.825598  |
| N | 1.443237 | -1.571613 | -0.938261 |
| C | 1.875088 | -0.614289 | -1.716157 |
| H | 1.685057 | -0.753229 | -2.779925 |
| C | 3.067324 | 1.039005  | -0.117026 |
| H | 2.549498 | 1.827934  | 0.418588  |
| C | 2.568945 | 0.568838  | -1.385701 |
| S | 2.933390 | 1.656777  | -2.785304 |
| O | 2.337170 | 1.089239  | -3.996852 |
| O | 2.557290 | 3.010848  | -2.372094 |
| C | 4.696568 | 1.589838  | -2.939314 |
| C | 5.478505 | 2.491740  | -2.225112 |
| C | 5.271311 | 0.609463  | -3.743961 |
| C | 6.860020 | 2.407437  | -2.327941 |
| H | 5.011441 | 3.253259  | -1.610963 |
| C | 6.652880 | 0.543433  | -3.833564 |
| H | 4.644559 | -0.082055 | -4.295911 |
| C | 7.467292 | 1.437394  | -3.129948 |
| H | 7.477449 | 3.109659  | -1.776670 |
| H | 7.108895 | -0.215158 | -4.462062 |
| C | 8.958850 | 1.371582  | -3.257966 |
| H | 9.287588 | 1.914626  | -4.150898 |
| H | 9.453416 | 1.823570  | -2.396066 |

|   |          |          |           |
|---|----------|----------|-----------|
| H | 9.303500 | 0.340021 | -3.359490 |
| H | 4.043455 | 0.724457 | 0.241067  |

**TS VI**

Energy: -2140.22740063

&lt;S\*\*2&gt;=2.04

Geometry:

|   |          |           |           |
|---|----------|-----------|-----------|
| C | 5.317692 | -3.460103 | -1.611143 |
| C | 4.018405 | -3.005466 | -1.818118 |
| C | 3.271701 | -2.488913 | -0.760193 |
| C | 3.852536 | -2.434313 | 0.508243  |
| C | 5.147308 | -2.894034 | 0.718524  |
| C | 5.885556 | -3.408303 | -0.343167 |
| H | 5.886837 | -3.853109 | -2.447418 |
| H | 3.600198 | -3.047377 | -2.818520 |
| H | 3.285136 | -2.025885 | 1.340153  |
| H | 5.582418 | -2.842534 | 1.711422  |
| H | 6.898600 | -3.762924 | -0.183490 |
| C | 1.838677 | -2.035148 | -0.914154 |
| H | 1.154372 | -2.864091 | -0.691091 |
| H | 1.609776 | -1.290019 | -0.136765 |
| C | 2.221500 | -0.773150 | -3.021021 |
| H | 2.241232 | -1.107028 | -4.056629 |
| C | 2.907555 | 1.098905  | -1.496867 |
| H | 3.470443 | 2.018184  | -1.405523 |
| C | 2.870478 | 0.417456  | -2.692668 |
| S | 3.821634 | 1.117080  | -4.048363 |
| O | 3.112560 | 0.825769  | -5.298906 |
| O | 4.128255 | 2.508418  | -3.706289 |
| C | 5.352986 | 0.212913  | -4.081190 |
| C | 6.391384 | 0.596963  | -3.239353 |
| C | 5.483187 | -0.872830 | -4.939575 |
| C | 7.576337 | -0.124214 | -3.263976 |
| H | 6.276834 | 1.450984  | -2.581051 |
| C | 6.678618 | -1.578226 | -4.953307 |
| H | 4.665595 | -1.152282 | -5.594916 |
| C | 7.740119 | -1.218421 | -4.118931 |
| H | 8.390537 | 0.169667  | -2.608641 |
| H | 6.787883 | -2.424456 | -5.624787 |
| C | 9.036548 | -1.970235 | -4.158883 |
| H | 9.727723 | -1.501158 | -4.867851 |
| H | 9.524317 | -1.973985 | -3.181587 |
| H | 8.888139 | -3.003377 | -4.480031 |

|   |           |           |           |
|---|-----------|-----------|-----------|
| H | 2.348265  | 0.749537  | -0.638381 |
| N | 1.414989  | -1.469637 | -2.172258 |
| H | 0.710205  | -2.549293 | -3.012254 |
| O | -1.340240 | -2.887880 | -4.397530 |
| P | 0.011306  | -3.440930 | -4.028012 |
| C | -0.045377 | -5.081728 | -3.266969 |
| C | 0.965997  | -5.546943 | -2.422794 |
| C | -1.155792 | -5.885604 | -3.535913 |
| C | 0.874077  | -6.818350 | -1.868552 |
| H | 1.825296  | -4.926322 | -2.186519 |
| C | -1.240957 | -7.155640 | -2.978970 |
| H | -1.948277 | -5.512429 | -4.176376 |
| C | -0.226957 | -7.622158 | -2.147691 |
| H | 1.659857  | -7.177668 | -1.212742 |
| H | -2.102719 | -7.779802 | -3.190488 |
| H | -0.297530 | -8.612986 | -1.711191 |
| C | 1.166397  | -3.476661 | -5.426769 |
| C | 0.975883  | -2.531917 | -6.439782 |
| C | 2.240637  | -4.367503 | -5.497232 |
| C | 1.856496  | -2.479645 | -7.513501 |
| H | 0.134870  | -1.848059 | -6.386766 |
| C | 3.117352  | -4.309162 | -6.573851 |
| H | 2.389773  | -5.114997 | -4.725167 |
| C | 2.927857  | -3.365290 | -7.579337 |
| H | 1.704370  | -1.747938 | -8.299840 |
| H | 3.946246  | -5.006799 | -6.630728 |
| H | 3.614397  | -3.323528 | -8.418575 |

**G + [P(O)-]**

Energy: -2140.28125868

&lt;S\*\*2&gt;=2.03

Geometry:

|   |          |           |           |
|---|----------|-----------|-----------|
| C | 4.174924 | -3.527894 | -0.018256 |
| C | 3.176002 | -2.779427 | -0.635584 |
| C | 2.402573 | -1.887890 | 0.103278  |
| C | 2.644353 | -1.757695 | 1.472302  |
| C | 3.637669 | -2.507313 | 2.091159  |
| C | 4.408856 | -3.395597 | 1.345896  |
| H | 4.772456 | -4.216011 | -0.608071 |
| H | 3.002004 | -2.885834 | -1.701583 |
| H | 2.050765 | -1.061092 | 2.059006  |
| H | 3.813946 | -2.393934 | 3.156170  |
| H | 5.188373 | -3.978075 | 1.826196  |
| C | 1.284453 | -1.079336 | -0.525787 |
| H | 0.325751 | -1.521687 | -0.238037 |
| H | 1.282534 | -0.066165 | -0.111880 |
| C | 2.115353 | -0.309952 | -2.756294 |
| H | 1.928639 | -0.461721 | -3.813810 |
| C | 3.637665 | 1.019711  | -1.197733 |
| H | 4.406866 | 1.780035  | -1.173990 |
| C | 3.119870 | 0.591965  | -2.418278 |
| S | 3.960543 | 1.246042  | -3.854913 |
| O | 3.077381 | 1.135060  | -5.024007 |
| O | 4.506967 | 2.564328  | -3.511374 |
| C | 5.344890 | 0.158889  | -4.136316 |
| C | 6.573385 | 0.449768  | -3.555726 |
| C | 5.168060 | -0.983255 | -4.910650 |
| C | 7.637822 | -0.419352 | -3.759125 |
| H | 6.695686 | 1.348613  | -2.961974 |
| C | 6.243171 | -1.838246 | -5.104647 |
| H | 4.205884 | -1.195093 | -5.364502 |
| C | 7.492167 | -1.571953 | -4.534574 |
| H | 8.600089 | -0.195132 | -3.308856 |
| H | 6.110237 | -2.728691 | -5.711928 |
| C | 8.654011 | -2.488704 | -4.775928 |
| H | 9.166155 | -2.220255 | -5.706544 |
| H | 9.385996 | -2.425395 | -3.968066 |
| H | 8.327865 | -3.526886 | -4.871449 |

|   |           |           |           |
|---|-----------|-----------|-----------|
| H | 3.303582  | 0.605223  | -0.257648 |
| N | 1.294795  | -1.023502 | -1.966897 |
| H | 0.677118  | -1.670624 | -2.458633 |
| O | -0.248550 | -2.912405 | -3.471325 |
| P | 0.382099  | -4.072088 | -4.221381 |
| C | -0.808342 | -5.344975 | -4.684357 |
| C | -0.615672 | -6.181345 | -5.789053 |
| C | -1.922899 | -5.524373 | -3.856646 |
| C | -1.542154 | -7.177628 | -6.068354 |
| H | 0.241963  | -6.047564 | -6.439391 |
| C | -2.844930 | -6.520604 | -4.146798 |
| H | -2.068780 | -4.875661 | -2.999297 |
| C | -2.654938 | -7.349070 | -5.249808 |
| H | -1.397156 | -7.818061 | -6.931877 |
| H | -3.714000 | -6.650792 | -3.510653 |
| H | -3.376043 | -8.128469 | -5.472523 |
| C | 1.359856  | -3.568263 | -5.653831 |
| C | 1.111347  | -2.324649 | -6.243825 |
| C | 2.392371  | -4.380003 | -6.134067 |
| C | 1.876450  | -1.912951 | -7.327664 |
| H | 0.319492  | -1.690471 | -5.859023 |
| C | 3.150534  | -3.960520 | -7.220295 |
| H | 2.613502  | -5.329472 | -5.655992 |
| C | 2.892395  | -2.729742 | -7.816954 |
| H | 1.679599  | -0.951807 | -7.790721 |
| H | 3.949701  | -4.591277 | -7.594684 |
| H | 3.489634  | -2.402486 | -8.661576 |

**38a\***

Energy: -2140.28502982

<S\*\*2>=2.01

Geometry:

|   |           |           |           |
|---|-----------|-----------|-----------|
| C | 3.546836  | 4.391931  | -5.096751 |
| C | 2.349781  | 4.722118  | -5.726398 |
| C | 1.124752  | 4.413703  | -5.134769 |
| C | 1.120583  | 3.759009  | -3.901320 |
| C | 2.313539  | 3.427677  | -3.268912 |
| C | 3.531263  | 3.745596  | -3.865263 |
| H | 4.492080  | 4.636844  | -5.570948 |
| H | 2.368604  | 5.219543  | -6.692303 |
| H | 0.173552  | 3.503997  | -3.432868 |
| H | 2.293953  | 2.915195  | -2.312209 |
| H | 4.463302  | 3.484920  | -3.374115 |
| C | -0.177710 | 4.812077  | -5.792940 |
| H | -0.019840 | 4.964293  | -6.865197 |
| H | -0.910518 | 4.008099  | -5.682953 |
| C | -0.192643 | 7.240682  | -5.504972 |
| H | 0.448060  | 7.318443  | -6.377702 |
| C | -0.794054 | 8.444117  | -4.957543 |
| S | -1.884780 | 9.390923  | -6.018391 |
| O | -2.313114 | 10.597177 | -5.295437 |
| O | -1.180924 | 9.558755  | -7.298298 |
| C | -3.313646 | 8.388360  | -6.334856 |
| C | -3.299534 | 7.499741  | -7.405894 |
| C | -4.419860 | 8.489976  | -5.496384 |
| C | -4.414022 | 6.706134  | -7.635200 |
| H | -2.431469 | 7.441246  | -8.052290 |
| C | -5.526152 | 7.691109  | -5.745350 |
| H | -4.415063 | 9.190321  | -4.668423 |
| C | -5.542138 | 6.789080  | -6.813652 |
| H | -4.409713 | 6.011724  | -8.469813 |
| H | -6.394033 | 7.769177  | -5.097518 |
| C | -6.754515 | 5.951646  | -7.089578 |
| H | -7.454608 | 6.495073  | -7.733861 |
| H | -6.489937 | 5.024156  | -7.601723 |
| H | -7.284886 | 5.703645  | -6.167528 |
| O | -1.414779 | 6.585406  | -2.500866 |
| P | -1.363737 | 8.072803  | -2.239731 |

|   |           |           |           |
|---|-----------|-----------|-----------|
| C | -3.020673 | 8.776009  | -2.040630 |
| C | -3.270795 | 10.150922 | -2.034892 |
| C | -4.076406 | 7.876360  | -1.881568 |
| C | -4.569068 | 10.617165 | -1.870778 |
| H | -2.462723 | 10.864111 | -2.160177 |
| C | -5.373498 | 8.348121  | -1.714521 |
| H | -3.873113 | 6.810811  | -1.898064 |
| C | -5.619606 | 9.716944  | -1.710685 |
| H | -4.761531 | 11.684702 | -1.870251 |
| H | -6.191586 | 7.646125  | -1.592351 |
| H | -6.632345 | 10.085671 | -1.584360 |
| C | -0.403251 | 8.494071  | -0.758128 |
| C | -0.944375 | 9.202918  | 0.315369  |
| C | 0.917229  | 8.035407  | -0.688412 |
| C | -0.169495 | 9.458245  | 1.442408  |
| H | -1.969934 | 9.553668  | 0.278797  |
| C | 1.686287  | 8.292559  | 0.438301  |
| H | 1.345502  | 7.466679  | -1.508853 |
| C | 1.143667  | 9.006593  | 1.503760  |
| H | -0.596048 | 10.009274 | 2.273887  |
| H | 2.709093  | 7.934175  | 0.486165  |
| H | 1.745902  | 9.207456  | 2.383725  |
| N | -0.770379 | 6.020294  | -5.246236 |
| H | -1.154976 | 5.944286  | -4.302846 |
| C | -0.514977 | 8.996419  | -3.609613 |
| H | 0.556278  | 8.896505  | -3.401424 |
| H | -0.793808 | 10.050756 | -3.528161 |



8a

Energy: -2140.38153446

<S\*\*2>=0

Geometry:

|   |           |           |            |
|---|-----------|-----------|------------|
| C | 3.037092  | 4.873700  | -2.476701  |
| C | 1.850325  | 5.015727  | -3.189764  |
| C | 1.151872  | 3.893360  | -3.632195  |
| C | 1.658840  | 2.626108  | -3.341309  |
| C | 2.846804  | 2.481928  | -2.633348  |
| C | 3.540815  | 3.607331  | -2.198370  |
| H | 3.567768  | 5.757292  | -2.136080  |
| H | 1.462595  | 6.008791  | -3.394127  |
| H | 1.116822  | 1.743398  | -3.670192  |
| H | 3.226731  | 1.489114  | -2.414077  |
| H | 4.465220  | 3.497289  | -1.640700  |
| C | -0.115914 | 4.014192  | -4.450388  |
| H | 0.132412  | 4.000542  | -5.517096  |
| H | -0.744706 | 3.136723  | -4.269245  |
| C | -0.933385 | 6.237319  | -5.037904  |
| H | -0.385493 | 6.098934  | -5.966828  |
| C | -1.579648 | 7.429678  | -4.867961  |
| S | -1.493041 | 8.532337  | -6.218193  |
| O | -1.433409 | 9.907141  | -5.695256  |
| O | -0.438018 | 8.083532  | -7.137639  |
| C | -3.045001 | 8.403127  | -7.090880  |
| C | -3.243749 | 7.344226  | -7.974276  |
| C | -4.048986 | 9.332403  | -6.854288  |
| C | -4.460598 | 7.227522  | -8.625678  |
| H | -2.450467 | 6.627365  | -8.157337  |
| C | -5.266031 | 9.197929  | -7.514913  |
| H | -3.874560 | 10.157864 | -6.173489  |
| C | -5.492183 | 8.148937  | -8.405701  |
| H | -4.615200 | 6.407443  | -9.320618  |
| H | -6.050983 | 9.925950  | -7.334352  |
| C | -6.800733 | 8.008754  | -9.124659  |
| H | -6.666333 | 8.136600  | -10.203500 |
| H | -7.228568 | 7.013987  | -8.969596  |
| H | -7.524707 | 8.750773  | -8.783393  |
| O | -1.810640 | 6.132560  | -1.683513  |
| P | -1.938245 | 7.598316  | -2.045084  |

|   |           |           |           |
|---|-----------|-----------|-----------|
| C | -3.195797 | 8.417816  | -1.025391 |
| C | -3.324759 | 9.808216  | -0.981915 |
| C | -4.060611 | 7.613903  | -0.282003 |
| C | -4.319960 | 10.386918 | -0.204437 |
| H | -2.645924 | 10.444627 | -1.541948 |
| C | -5.054059 | 8.198512  | 0.496555  |
| H | -3.944653 | 6.535505  | -0.313610 |
| C | -5.184716 | 9.582603  | 0.533659  |
| H | -4.417588 | 11.466838 | -0.169702 |
| H | -5.724497 | 7.571990  | 1.075519  |
| H | -5.959298 | 10.037877 | 1.142151  |
| C | -0.386200 | 8.504863  | -1.831052 |
| C | 0.460988  | 8.088426  | -0.800187 |
| C | -0.027236 | 9.589913  | -2.633832 |
| C | 1.653588  | 8.760967  | -0.566574 |
| H | 0.187527  | 7.233512  | -0.189933 |
| C | 1.169511  | 10.258012 | -2.394348 |
| H | -0.656126 | 9.905401  | -3.460555 |
| C | 2.006582  | 9.847671  | -1.362058 |
| H | 2.309182  | 8.435197  | 0.234204  |
| H | 1.450364  | 11.097408 | -3.021899 |
| H | 2.939263  | 10.371808 | -1.180172 |
| N | -0.886127 | 5.209211  | -4.188349 |
| H | -1.276160 | 5.328069  | -3.246806 |
| C | -2.518124 | 7.829175  | -3.767813 |
| H | -2.796055 | 8.882370  | -3.872815 |
| H | -3.455812 | 7.255943  | -3.799533 |

## 18. References

1. H. Hofmeister, K. Annen, H. Laurent and R. Wiechert, *Angew. Chem. Int. Ed. Engl.*, 1984, **23**, 727.
2. C. Gommenginger, Y. Zheng, D. Maccarone, I. Ciofini and L. Miesch, *Org. Chem. Front.*, 2023, **10**, 4055.
3. J. Li, C. Ma, D. Xing and W. Hu, *Org. Lett.*, 2019, **21**, 2101.
4. Y. Zheng, B. Moegle, S. Ghosh, A. Perfetto, D. Luise, I. Ciofini and L. Miesch, *Chem. Eur. J.*, 2022, **28**, e202103598.
5. P.-W. Zhu, H.-M. Ma, Y. Li, L.-Z. Miao and J. Zhu, *J. Org. Chem.*, 2023, **88**, 2069.
6. M. Hourtoule and L. Miesch, *Org. Lett.*, 2022, **24**, 3896.
7. C. Gommenginger, M. Hourtoule, M. Menghini and L. Miesch, *Org. Biomol. Chem.*, 2024, **22**, 940.
8. W.-F. Zheng, G.-J. Sun, L. Chen and Q. Kang, *Adv. Synth. Catal.*, 2018, **360**, 1790.
9. G. Luo, Y. Liu, N. Ding, X. Li and Z. Zhao, *ACS Omega*, 2019, **4**, 15312.
10. L. García, J. Sendra, N. Miralles, E. Reyes, J. J. Carbó, J. L. Vicario and E. Fernández, *Chem. Eur. J.*, 2018, **24**, 14059.
11. H.-H. Li, X.-X. Li, Z.-G. Zhao, X. Yuan and C.-Y. Sun, *Org. Biomol. Chem.*, 2017, **15**, 4005.
12. C. Adamo and V. Barone, *J. Chem. Phys.*, 1999, **110**, 6158.
13. K. B. Wiberg, *J. Comput. Chem.*, 1986, **7**, 379.
14. S. Miertuš, E. Scrocco and J. Tomasi, *Chem. Phys.*, 1981, **55**, 117.
15. E. Cancès, B. Mennucci and J. Tomasi, *J. Chem. Phys.*, 1997, **107**, 3032.
